# Supplementary material
Source: MDPI journal article supplement (https://www.mdpi.com/2304-6740/7/5/65)
Supplement: s1 [file s1]

# Supplementary Information

## Transmetalation from Magnesium NHCs – Convenient Synthesis of Chelating $\pi$ -Acidic NHC Complexes

Julian Messelberger<sup>1</sup>, Annette Grünwald<sup>1</sup>, Philipp Stegner<sup>1</sup>, Laura Senft<sup>2</sup>, Frank W. Heinemann<sup>1</sup>,  
and Dominik Munz<sup>1,\*</sup>

<sup>1</sup> Lehrstuhl für Anorganische und Allgemeine Chemie, Friedrich-Alexander-Universität Erlangen-Nürnberg; Egerlandstr. 1; 91058 Erlangen

<sup>2</sup> Lehrstuhl für Bioanorganische Chemie, Friedrich-Alexander-Universität Erlangen-Nürnberg, Egerlandstr. 1; 91058 Erlangen

\* Correspondence: dominik.munz@fau.de; Tel.: +49-9131-85-27464

### Contents

|                                                                                          |     |
|------------------------------------------------------------------------------------------|-----|
| 1. NMR Spectra.....                                                                      | S2  |
| 1.1. Proton and Carbon NMR Spectra of Benzimidazolium Salt <b>1<sup>benz</sup></b> ..... | S2  |
| 1.2. Proton and Carbon NMR Spectra of Free Carbene <b>2<sup>sa</sup></b> .....           | S3  |
| 1.3. Proton and Carbon NMR Spectra of Free Carbene <b>2<sup>benz</sup></b> .....         | S3  |
| 1.4. Proton and Carbon NMR Spectra of Palladium Complex <b>3<sup>sa</sup></b> .....      | S4  |
| 1.5. Proton and Carbon NMR Spectra of Palladium Complex <b>3<sup>benz</sup></b> .....    | S5  |
| 1.6. Proton and Carbon NMR Spectra of Magnesium Complex <b>4<sup>sa</sup></b> .....      | S6  |
| 1.7. Proton and Carbon NMR Spectra of Magnesium Complex <b>4<sup>benz</sup></b> .....    | S7  |
| 1.8. The Impact of Magnesium Bromide on The Purity of The Palladium Complex .....        | S8  |
| 2. X-ray Crystallographic Data .....                                                     | S9  |
| 2.1. Palladium(II) Complex <b>3<sup>benz</sup></b> .....                                 | S9  |
| 2.2. Magnesium Complex <b>4<sup>sa</sup></b> .....                                       | S10 |
| 3. References.....                                                                       | S13 |

# 1. NMR Spectra

## 1.1. Proton and Carbon NMR Spectra of Benzimidazolium Salt **1<sup>benz</sup>**

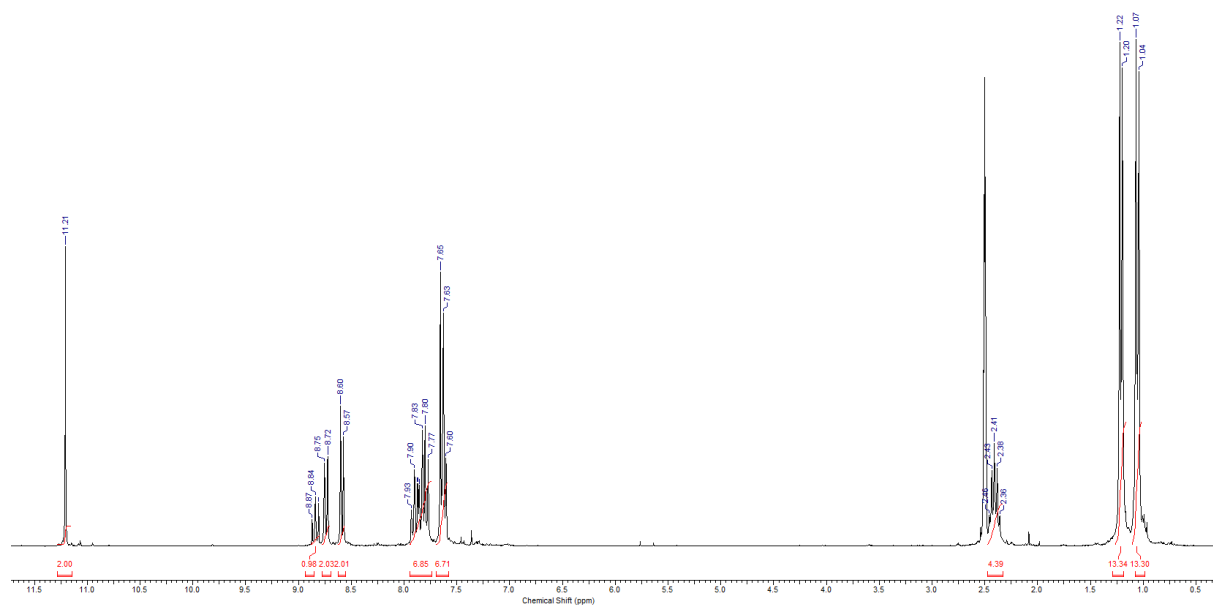

Figure S1. <sup>1</sup>H NMR spectrum of benzimidazolium salt **1<sup>benz</sup>** (270 MHz, DMSO-D<sub>6</sub>).

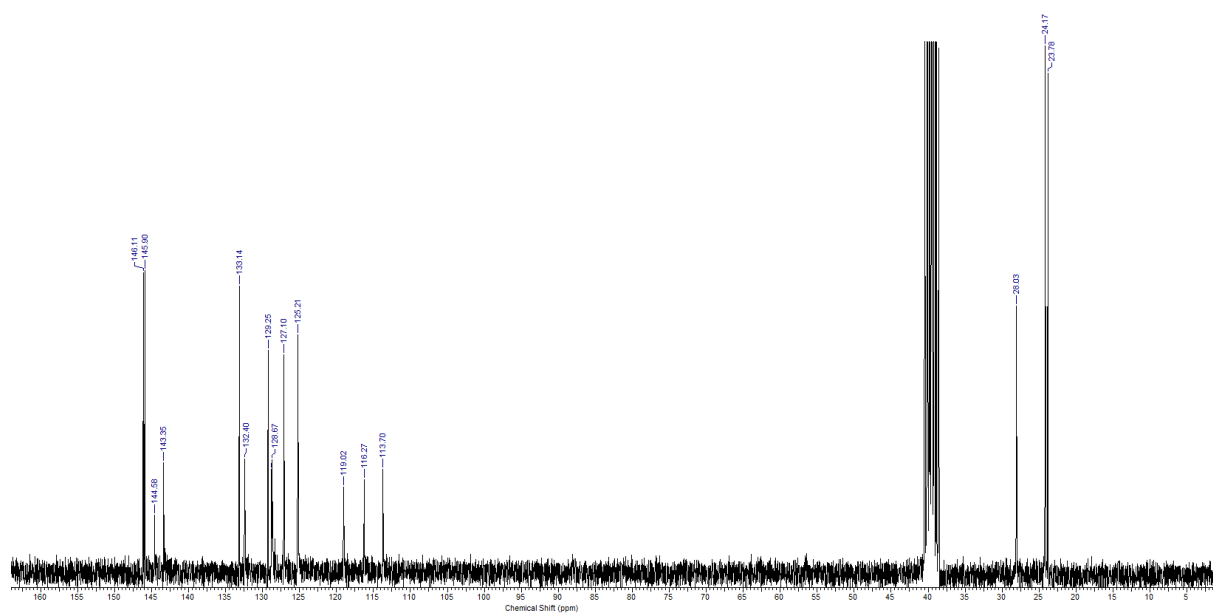

Figure S2. <sup>13</sup>C NMR spectrum of benzimidazolium salt **1<sup>benz</sup>** (68 MHz, DMSO-D<sub>6</sub>).

### 1.2. Proton and Carbon NMR Spectra of Free Carbene 2<sup>sa</sup>

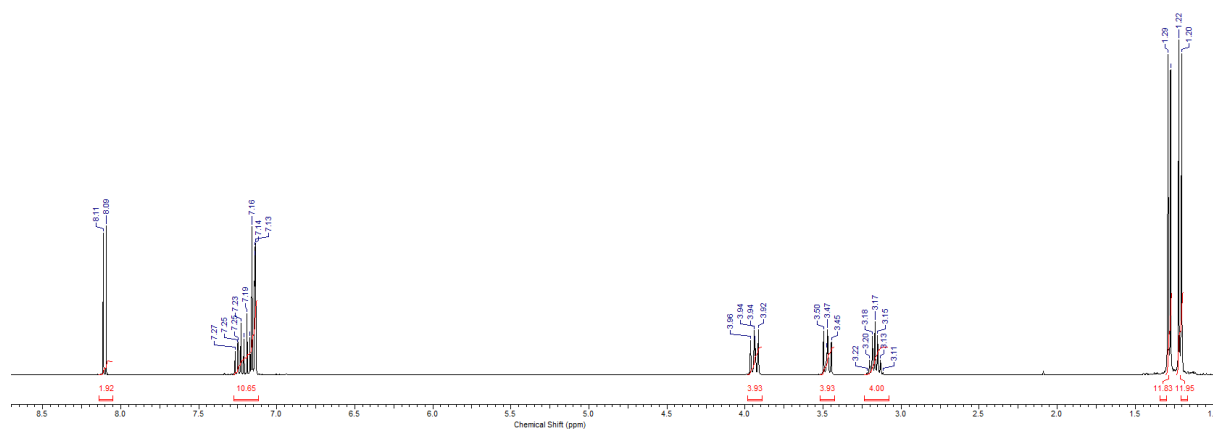

Figure S3. <sup>1</sup>H NMR spectrum of free carbene 2<sup>sa</sup> (400 MHz, C<sub>6</sub>D<sub>6</sub>).

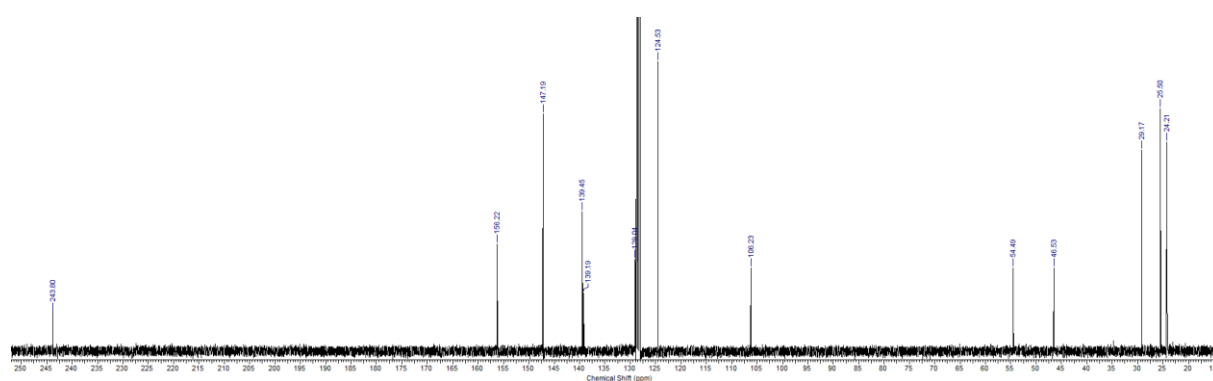

Figure S4. <sup>13</sup>C NMR spectrum of free carbene 2<sup>sa</sup> (101 MHz, C<sub>6</sub>D<sub>6</sub>).

### 1.3. Proton and Carbon NMR Spectra of Free Carbene 2<sup>benz</sup>

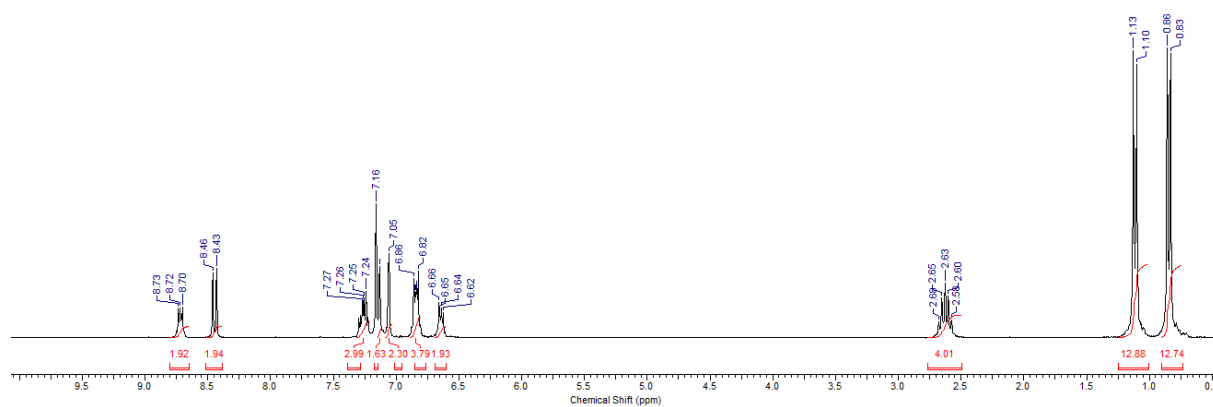

Figure S5. <sup>1</sup>H NMR spectrum of free carbene 2<sup>benz</sup> (270 MHz, C<sub>6</sub>D<sub>6</sub>).

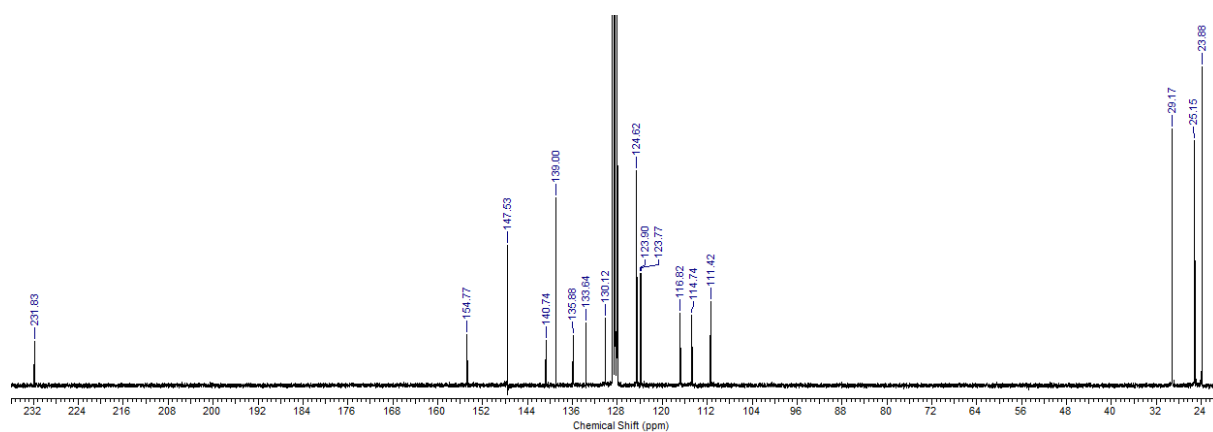

**Figure S6.**  $^{13}\text{C}$  NMR spectrum of free carbene  $2^{\text{benz}}$  (68 MHz,  $\text{C}_6\text{D}_6$ ).

#### 1.4. Proton and Carbon NMR Spectra of Palladium Complex $3^{\text{sa}}$

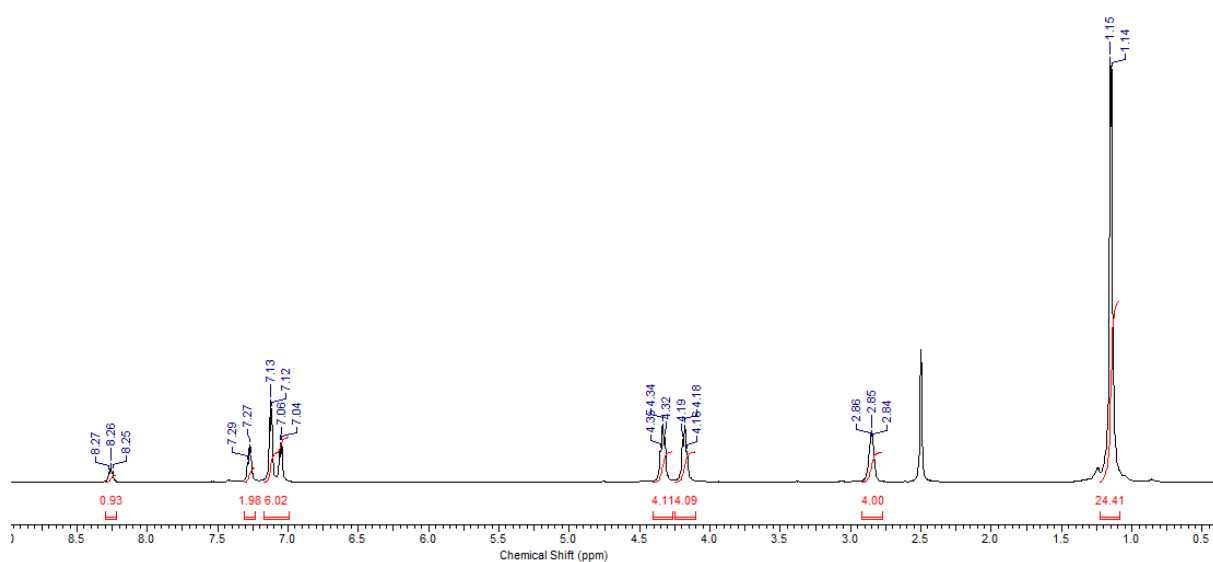

**Figure S7.**  $^1\text{H}$  NMR spectrum of palladium complex  $3^{\text{sa}}$  (600 MHz,  $\text{DMSO}-d_6$ ).

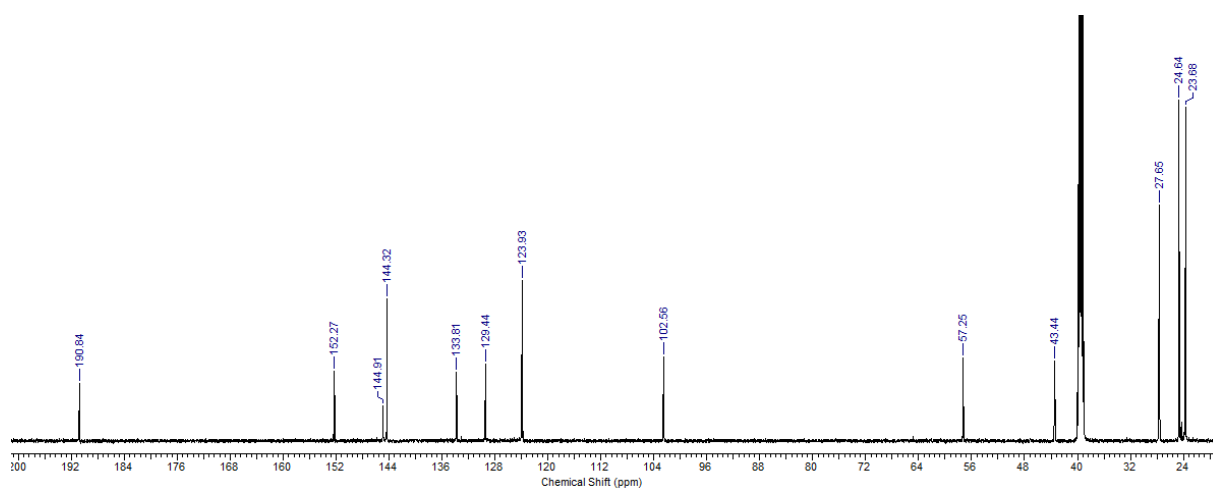

**Figure S8.**  $^{13}\text{C}$  NMR spectrum of palladium complex  $3^{\text{sa}}$  (151 MHz,  $\text{DMSO}-d_6$ )

1.5. Proton and Carbon NMR Spectra of Palladium Complex  $3^{\text{benz}}$

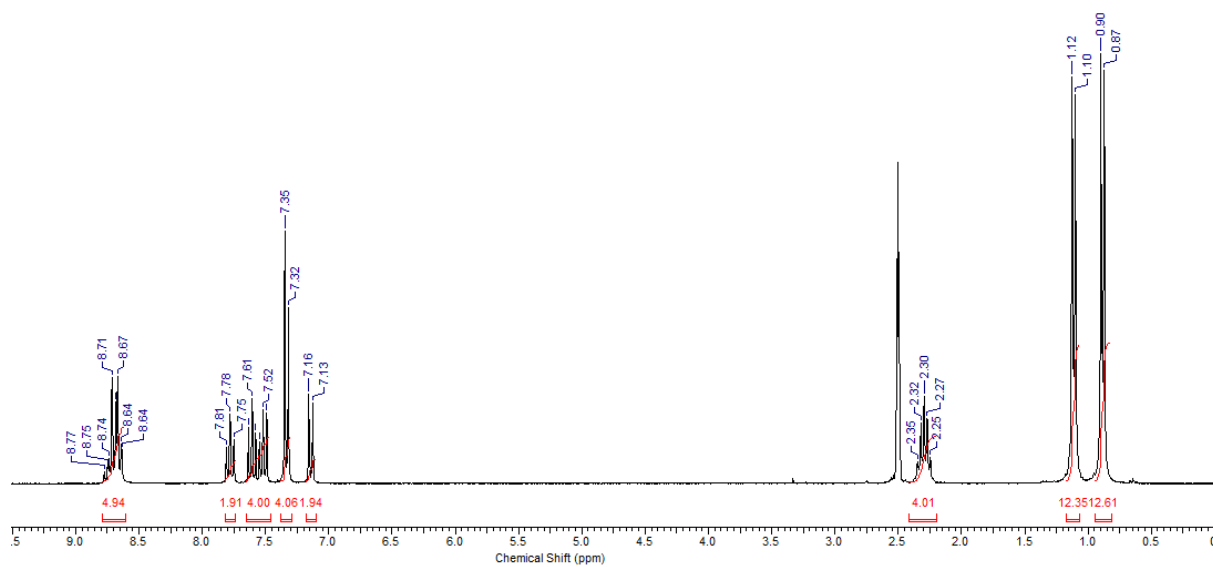

Figure S9.  $^1\text{H}$  NMR spectrum of palladium complex  $3^{\text{benz}}$  (270 MHz,  $\text{DMSO-D}_6$ ).

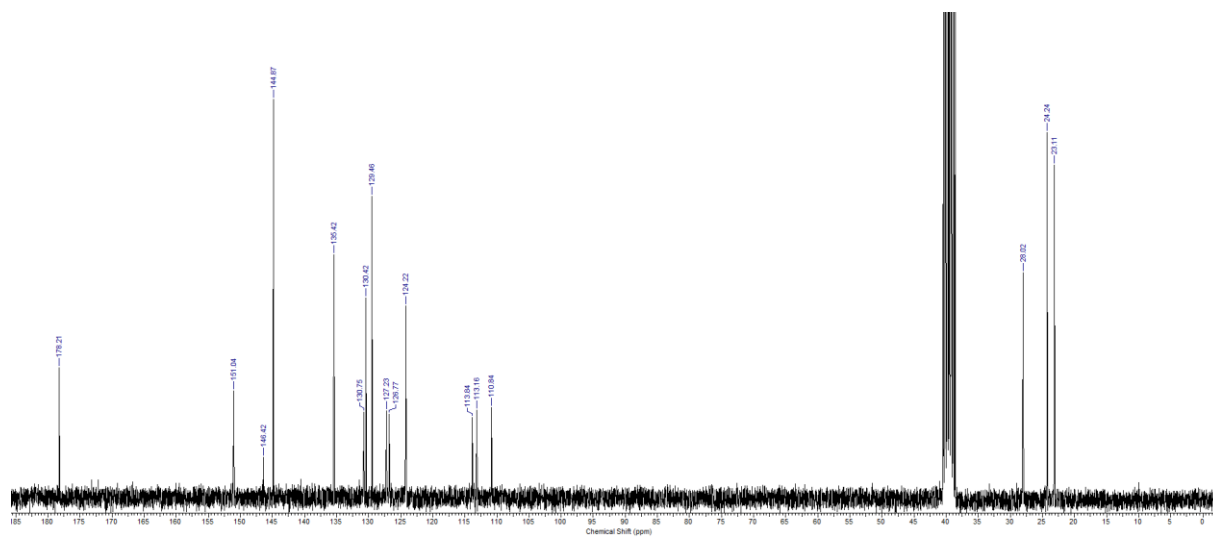

Figure S10.  $^{13}\text{C}$  NMR spectrum of palladium complex  $3^{\text{benz}}$  (68 MHz,  $\text{DMSO-D}_6$ ).

### 1.6. Proton and Carbon NMR Spectra of Magnesium Complex 4<sup>sa</sup>

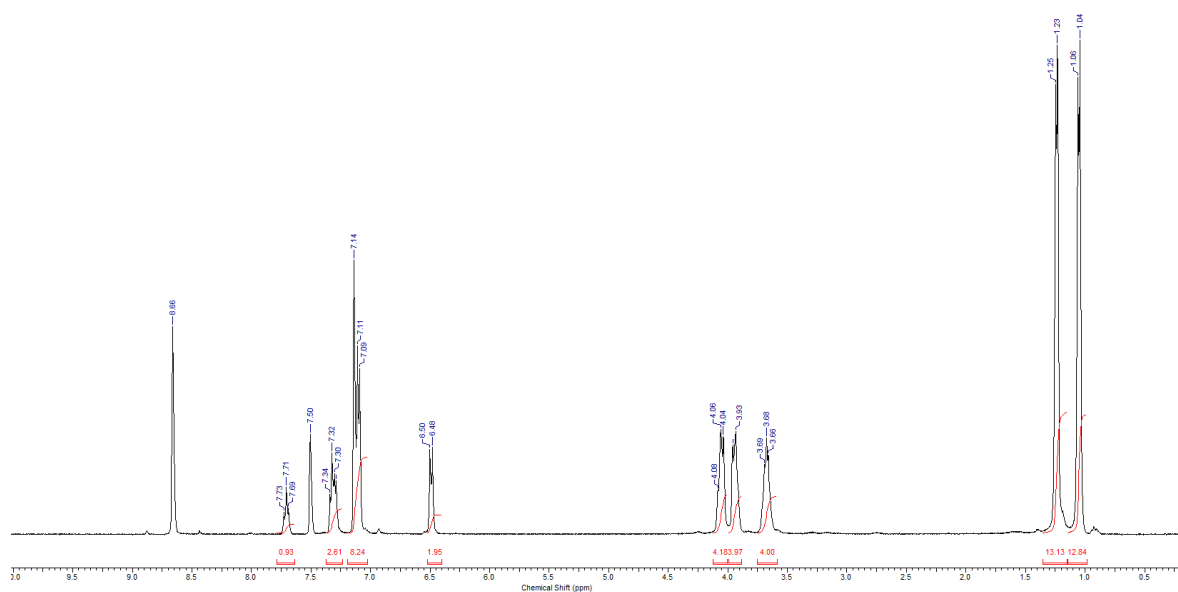

Figure S11. <sup>1</sup>H NMR spectrum of magnesium complex 4<sup>sa</sup> (400 MHz, pyridine-D<sub>5</sub>).

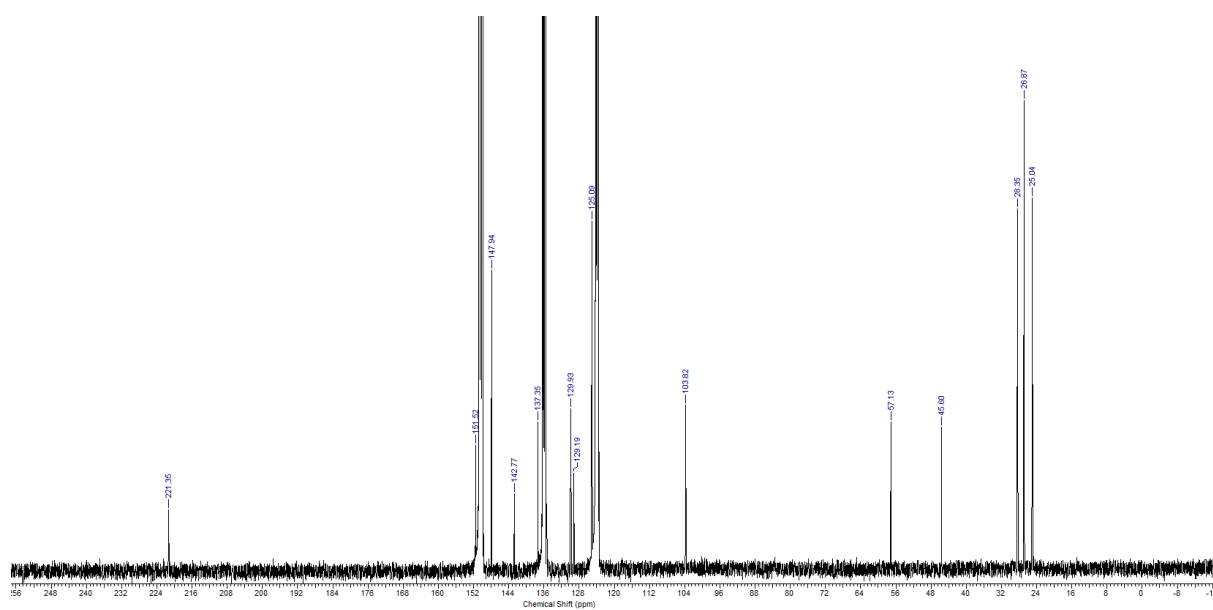

Figure S12. <sup>13</sup>C NMR spectrum of magnesium complex 4<sup>sa</sup> (101 MHz, pyridine-D<sub>5</sub>).

### 1.7. Proton and Carbon NMR Spectra of Magnesium Complex $4^{benz}$

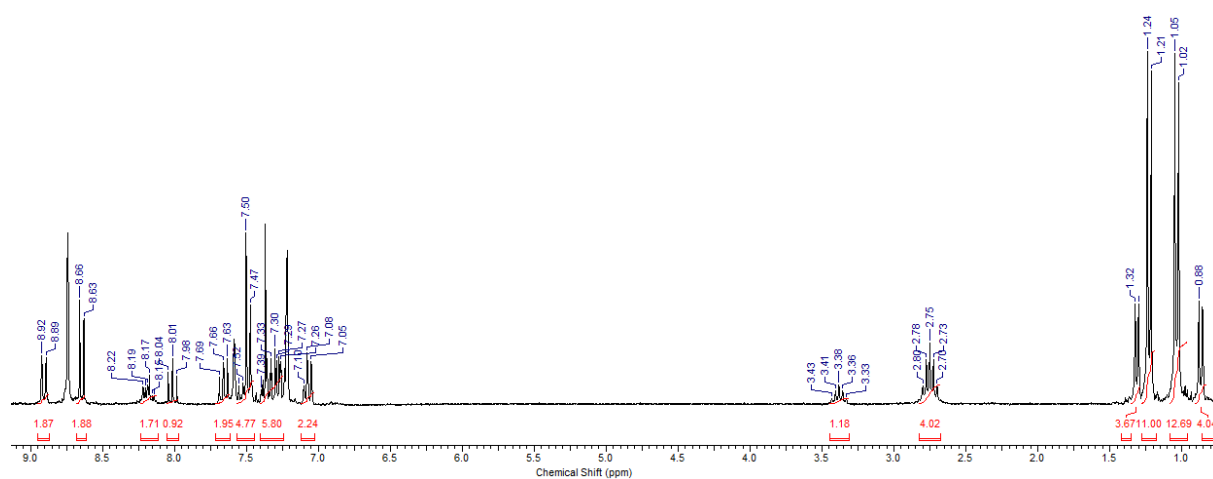

Figure S13.  $^1\text{H}$  NMR spectrum of magnesium complex  $4^{benz}$  (270 MHz, pyridine- $\text{D}_5$ ).

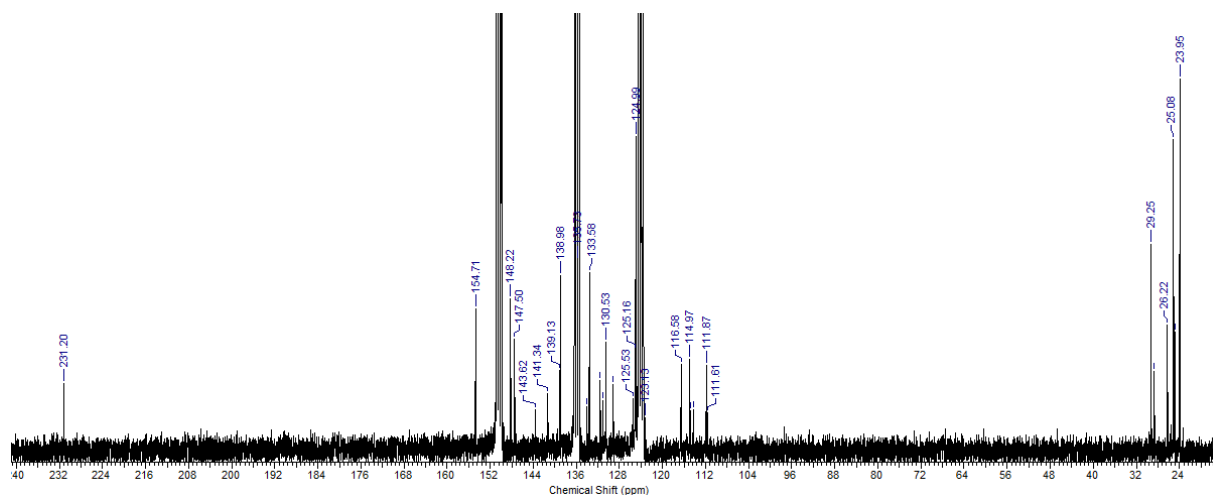

Figure S14.  $^{13}\text{C}$  NMR spectrum of magnesium complex  $4^{benz}$  (68 MHz, pyridine- $\text{D}_5$ ).

1.8. The Impact of Magnesium Bromide on The Purity of The Palladium Complex

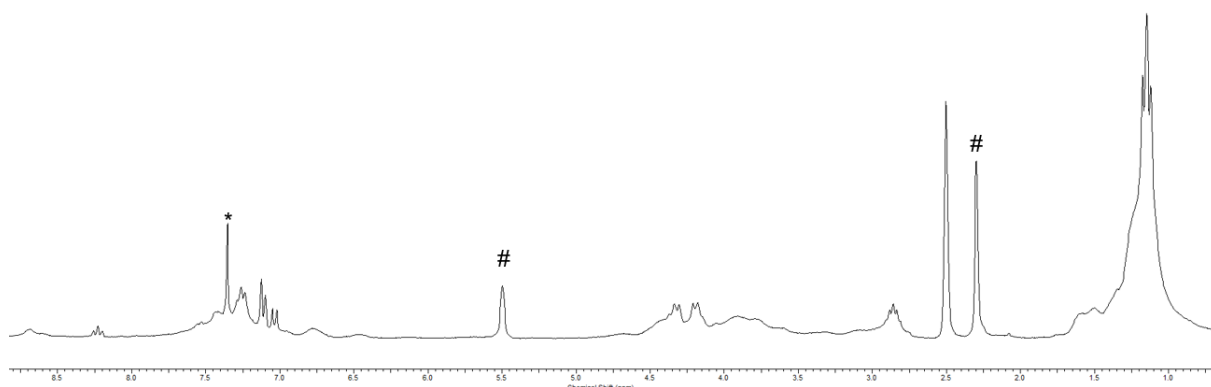

**Figure S15.** The crude <sup>1</sup>H NMR spectrum of the reaction of free carbene **2<sup>sa</sup>** with [Pd(COD)Cl<sub>2</sub>] (270 MHz, DMSO-D<sub>6</sub>) indicates the formation of a mixture of products. The free carbene was dissolved in benzene and [Pd(COD)Cl<sub>2</sub>] was added. The solvent was removed in vacuo until a solid was obtained. The solid was dissolved in DMSO-D<sub>6</sub> and analyzed by NMR spectroscopy. Marked signals are due to residual 1,5-cyclooctadiene (#) and benzene (\*).



## 2. X-ray Crystallographic Data

CCDC-1906543 for **3<sup>benz</sup>** and CCDC-1906542 for **4<sup>sa</sup>** contain the supplementary crystallographic data for this paper. The data can be obtained free of charge from Cambridge Crystallographic Data Centre, 12 Union Road, Cambridge, CB2 1EZ, UK (fax: ++33-1223-336-033; e-mail:deposit@ccdc.cam.ac.uk).

### 2.1. Palladium(II) Complex **3<sup>benz</sup>**

Single crystals of **3<sup>benz</sup>** were obtained by slow evaporation of a saturated solution in CH<sub>2</sub>Cl<sub>2</sub>. The crystals were obtained as yellow platelets and the sample was coated with protective perfluoropolyalkylether oil. A suitable single crystal was selected, mounted on a MiTeGen micro mount and transferred to the cold nitrogen gas stream of the diffractometer. Intensity data were collected at 100 K on a Bruker Kappa APEX 2 I $\mu$ S Duo diffractometer equipped with QUAZAR focusing Montel optics using MoK $\alpha$  radiation ( $\lambda = 0.71073$  Å). Data were corrected for Lorentz and polarization effects; semiempirical absorption corrections were performed on the basis of multiple scans using SADABS [1]. The structure was solved by direct methods (*SHELXT*) [2] and refined by full-matrix least-squares procedures on  $F^2$  using *SHELXL 2014/6* [3]. *OLEX2* was used to prepare material for publication [4].

|                                                            |                                                                   |
|------------------------------------------------------------|-------------------------------------------------------------------|
| <b>Identification code</b>                                 | <b>3<sup>benz</sup></b>                                           |
| <b>Empirical formula</b>                                   | C <sub>43</sub> H <sub>45</sub> Br <sub>2</sub> N <sub>5</sub> Pd |
| <b>Formula weight [g mol<sup>-1</sup>]</b>                 | 898.06                                                            |
| <b>Temperature [K]</b>                                     | 100                                                               |
| <b>Crystal system</b>                                      | monoclinic                                                        |
| <b>Space group</b>                                         | <i>P</i> 2 <sub>1</sub> / <i>n</i>                                |
| <b><i>a</i> [Å]</b>                                        | 20.957(5)                                                         |
| <b><i>b</i> [Å]</b>                                        | 8.173(2)                                                          |
| <b><i>c</i> [Å]</b>                                        | 22.929(5)                                                         |
| <b><math>\alpha</math> [°]</b>                             | 90                                                                |
| <b><math>\beta</math> [°]</b>                              | 106.623(3)                                                        |
| <b><math>\gamma</math> [°]</b>                             | 90                                                                |
| <b>Volume [Å<sup>3</sup>]</b>                              | 3763(2)                                                           |
| <b><i>Z</i></b>                                            | 4                                                                 |
| <b><math>\rho_{\text{calc}}</math> [g cm<sup>-3</sup>]</b> | 1.585                                                             |
| <b><math>\mu</math> [mm<sup>-1</sup>]</b>                  | 2.66                                                              |
| <b><i>F</i>(000)</b>                                       | 1816                                                              |
| <b>Crystal size [mm<sup>3</sup>]</b>                       | 0.16 × 0.08 × 0.02                                                |
| <b>Radiation, wavelength [Å]</b>                           | MoK $\alpha$ , $\lambda = 0.71073$                                |

|                                                                       |                                                                  |
|-----------------------------------------------------------------------|------------------------------------------------------------------|
| <b>2<math>\theta</math> range for data collection [°]</b>             | 2.32 to 52.00                                                    |
| <b>Index ranges</b>                                                   | -25 ≤ h ≤ 25, -9 ≤ k ≤ 10, -28 ≤ l ≤ 28                          |
| <b>Reflections collected</b>                                          | 46711                                                            |
| <b>Independent reflections</b>                                        | 7389 [ $R_{\text{int}} = 0.1164$ , $R_{\text{sigma}} = 0.0882$ ] |
| <b>Data/restraints/parameters</b>                                     | 7389/0/468                                                       |
| <b>Goodness-of-fit on <math>F^2</math></b>                            | 1.089                                                            |
| <b>Final <math>R</math> indexes [<math>I &gt; 2\sigma(I)</math>]</b>  | $R_1 = 0.0694$ , $wR_2 = 0.1525$                                 |
| <b>Final <math>R</math> indexes [all data]</b>                        | $R_1 = 0.1029$ , $wR_2 = 0.1683$                                 |
| <b>Largest diff. peak/hole [<math>\text{e}\text{\AA}^{-3}</math>]</b> | 1.57/-1.49                                                       |

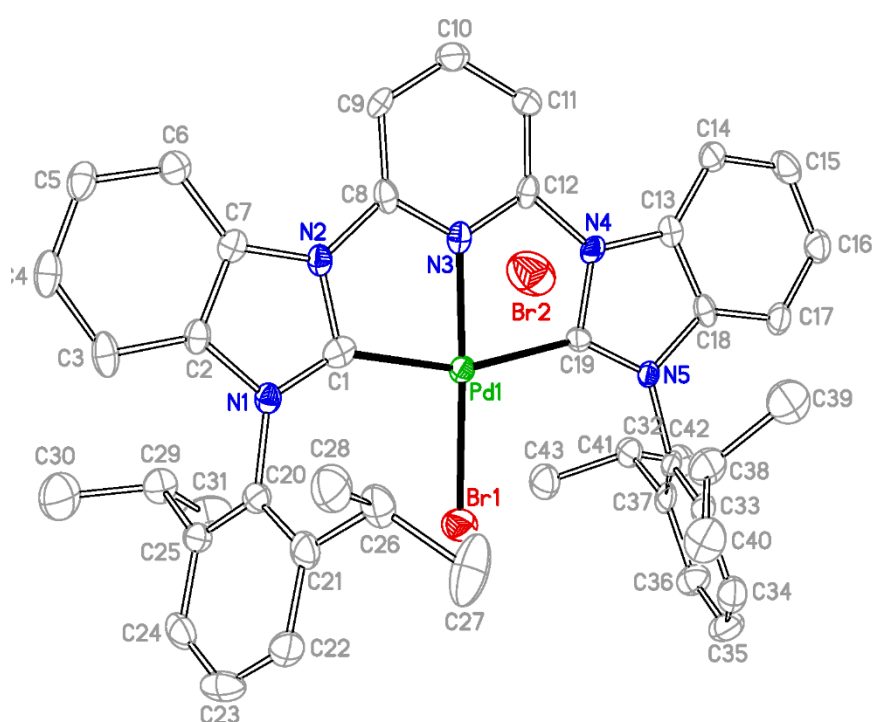

**Figure S16.** Thermal ellipsoid representation of the molecular structure of **3<sup>benz</sup>** with the applied numbering scheme (50% probability level, hydrogen atoms omitted for clarity).

## 2.2. Magnesium Complex **4<sup>sa</sup>**

Single crystals of **4<sup>sa</sup>** were obtained by vapor diffusion of pentane into a saturated solution of **4<sup>sa</sup>** in pyridine. The crystals were obtained as colorless prisms and the sample was coated with protective perfluoropolyalkylether oil. A suitable single crystal was selected, mounted on a MiTeGen micro mount and transferred to the cold nitrogen gas stream of the diffractometer. Intensity data were collected at 100 K on a Bruker Kappa Photon 2  $I\mu S$  Duo diffractometer equipped with QUAZAR focusing Montel optics using  $\text{MoK}\alpha$  radiation ( $\lambda = 0.71073 \text{ \AA}$ ). Data were corrected for Lorentz and polarization effects;

semiempirical absorption corrections were performed on the basis of multiple scans using SADABS [1]. The structure was solved by direct methods (*SHELXT*) [2] and refined by full-matrix least-squares procedures on  $F^2$  using *SHELXL 2014/6* [3]. *OLEX2* was used to prepare material for publication [4]. The compound crystallized with two molecules of pyridine per formula unit.

|                                                                                           |                                                                                                                                                 |
|-------------------------------------------------------------------------------------------|-------------------------------------------------------------------------------------------------------------------------------------------------|
| <b>Identification code</b>                                                                | <b>4<sup>sa</sup></b>                                                                                                                           |
| <b>Empirical formula</b>                                                                  | <b>C<sub>50</sub>H<sub>60</sub>Br<sub>2</sub>MgN<sub>8</sub></b>                                                                                |
| <b>Formula weight [g mol<sup>-1</sup>]</b>                                                | <b>957.19</b>                                                                                                                                   |
| <b>Temperature [K]</b>                                                                    | <b>100</b>                                                                                                                                      |
| <b>Crystal system</b>                                                                     | <b>Monoclinic</b>                                                                                                                               |
| <b>Space group</b>                                                                        | <b><i>P</i>2<sub>1</sub>/<i>n</i></b>                                                                                                           |
| <b><i>a</i> [Å]</b>                                                                       | <b>19.0860(8)</b>                                                                                                                               |
| <b><i>b</i> [Å]</b>                                                                       | <b>12.8472(6)</b>                                                                                                                               |
| <b><i>c</i> [Å]</b>                                                                       | <b>20.6882(8)</b>                                                                                                                               |
| <b><math>\alpha</math> [°]</b>                                                            | <b>90</b>                                                                                                                                       |
| <b><math>\beta</math> [°]</b>                                                             | <b>111.643(1)</b>                                                                                                                               |
| <b><math>\gamma</math> [°]</b>                                                            | <b>90</b>                                                                                                                                       |
| <b>Volume [Å<sup>3</sup>]</b>                                                             | <b>4715.1(3)</b>                                                                                                                                |
| <b><i>Z</i></b>                                                                           | <b>4</b>                                                                                                                                        |
| <b><math>\rho_{\text{calc}}</math> [g cm<sup>-3</sup>]</b>                                | <b>1.348</b>                                                                                                                                    |
| <b><math>\mu</math> [mm<sup>-1</sup>]</b>                                                 | <b>1.776</b>                                                                                                                                    |
| <b><i>F</i>(000)</b>                                                                      | <b>1992</b>                                                                                                                                     |
| <b>Crystal size [mm<sup>3</sup>]</b>                                                      | <b>0.15 x 0.13 x 0.08</b>                                                                                                                       |
| <b>Radiation, wavelength [Å]</b>                                                          | <b>MoK<math>\alpha</math>, <math>\lambda</math> = 0.71073</b>                                                                                   |
| <b>2<math>\theta</math> range for data collection [°]</b>                                 | <b>3.65 to 59.21</b>                                                                                                                            |
| <b>Index ranges</b>                                                                       | <b>-26 <math>\leq</math> h <math>\leq</math> 26, -17 <math>\leq</math> k <math>\leq</math> 17, -28 <math>\leq</math> l <math>\leq</math> 24</b> |
| <b>Reflections collected</b>                                                              | <b>186565</b>                                                                                                                                   |
| <b>Independent reflections</b>                                                            | <b>13232 [<i>R</i><sub>int</sub> = 0.0639, <i>R</i><sub>sigma</sub> = 0.0290]</b>                                                               |
| <b>Data/restraints/parameters</b>                                                         | <b>13232/0/558</b>                                                                                                                              |
| <b>Goodness-of-fit on <i>F</i><sup>2</sup></b>                                            | <b>1.038</b>                                                                                                                                    |
| <b>Final <i>R</i> indexes [<i>I</i> <math>\geq</math> 2<math>\sigma</math>(<i>I</i>)]</b> | <b><i>R</i><sub>1</sub> = 0.0307, <i>wR</i><sub>2</sub> = 0.0623</b>                                                                            |
| <b>Final <i>R</i> indexes [all data]</b>                                                  | <b><i>R</i><sub>1</sub> = 0.0474, <i>wR</i><sub>2</sub> = 0.0680</b>                                                                            |
| <b>Largest diff. peak/hole [eÅ<sup>-3</sup>]</b>                                          | <b>0.54/-0.40</b>                                                                                                                               |

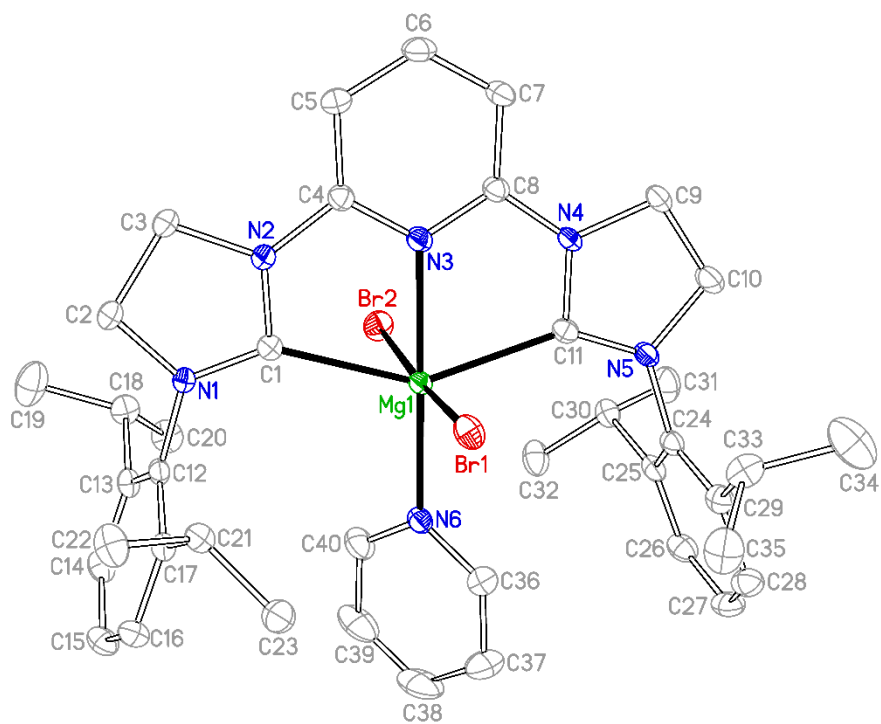

**Figure S17.** Thermal ellipsoid representation of the molecular structure of  $4^{sa} \times 2 C_5H_6N$  with the applied numbering scheme (50% probability level, hydrogen atoms and solvent molecules omitted for clarity).

### 3. References

1. Krause, L.; Herbst-Irmer, R.; Sheldrick, G. M.; Stalke, D. Comparison of silver and molybdenum microfocus X-ray sources for single-crystal structure determination. *J. Appl. Crystallogr.* **2015**, *48*, 3-10.
2. Sheldrick, G. M. SHELXT - integrated space-group and crystal-structure determination. *Acta Cryst.* **2015**, *A71*, 3-8.
3. Sheldrick, G. M. Crystal structure refinement with SHELXL. *Acta Cryst.* **2015**, *C71*, 3-8.
4. Dolomanov, O. V.; Bourhis, L. J.; Gildea, R. J.; Howard, J. A. K.; Puschmann, H. OLEX2: a complete structure solution, refinement and analysis program. *J. Appl. Crystallogr.* **2009**, *42*, 339-341.
