# Supplementary material
Source: MDPI journal article supplement (https://www.mdpi.com/2304-6740/7/5/65)
Supplement: s1 [file s1]

Archive with 7 entries (5 files):
- inorganics-510360-supplementary/
- inorganics-510360-supplementary/cif and checkcif files/
- inorganics-510360-supplementary/cif and checkcif files/dm1603.cif
- inorganics-510360-supplementary/cif and checkcif files/dm1603_checkcif_report.pdf
- inorganics-510360-supplementary/cif and checkcif files/jm1901.cif
- inorganics-510360-supplementary/cif and checkcif files/jm1901_checkcif_report.pdf
- inorganics-510360-supplementary/inorganics-510360-supplementary.pdf
