# Supplementary material
Source: MDPI journal article supplement (https://www.mdpi.com/2304-6740/7/5/65)
Supplement: s1 [file s1 › inorganics-510360-supplementary/cif and checkcif files/dm1603.cif]

data_dm1603
_audit_creation_date              2016-12-12
_audit_creation_method
;
Olex2 1.2
(compiled 2016.11.24 svn.r3356 for OlexSys, GUI svn.r5267)
;
_shelxl_version_number            2014/6
_publ_contact_author_address      ?
_publ_contact_author_email        ?
_publ_contact_author_id_orcid     ?
_publ_contact_author_name         ''
_publ_contact_author_phone        ?
_publ_section_references
;
Dolomanov, O.V., Bourhis, L.J., Gildea, R.J, Howard, J.A.K. & Puschmann, H.
 (2009), J. Appl. Cryst. 42, 339-341.

Sheldrick, G.M. (2015). Acta Cryst. C71, 3-8.
;
_chemical_name_common             ?
_chemical_name_systematic
;
 ? 
;
_chemical_formula_moiety          'C43 H45 Br N5 Pd, Br'
_chemical_formula_sum             'C43 H45 Br2 N5 Pd'
_chemical_formula_weight          898.06
_chemical_melting_point           ?
loop_
  _atom_type_symbol
  _atom_type_description
  _atom_type_scat_dispersion_real
  _atom_type_scat_dispersion_imag
  _atom_type_scat_source
 'C' 'C' 0.0033 0.0016 'International Tables Vol C Tables 4.2.6.8 and 6.1.1.4'
 'H' 'H' 0.0000 0.0000 'International Tables Vol C Tables 4.2.6.8 and 6.1.1.4'
 'N' 'N' 0.0061 0.0033 'International Tables Vol C Tables 4.2.6.8 and 6.1.1.4'
 'Br' 'Br' -0.2901 2.4595
 'International Tables Vol C Tables 4.2.6.8 and 6.1.1.4'
 'Pd' 'Pd' -0.9988 1.0072
 'International Tables Vol C Tables 4.2.6.8 and 6.1.1.4'

_shelx_space_group_comment
;
The symmetry employed for this shelxl refinement is uniquely defined
by the following loop, which should always be used as a source of
symmetry information in preference to the above space-group names.
They are only intended as comments.
;
_space_group_crystal_system       'monoclinic'
_space_group_IT_number            14
_space_group_name_H-M_alt         'P 1 21/n 1'
_space_group_name_Hall            '-P 2yn'
loop_
  _space_group_symop_operation_xyz
 'x, y, z'
 '-x+1/2, y+1/2, -z+1/2'
 '-x, -y, -z'
 'x-1/2, -y-1/2, z-1/2'

_cell_length_a                    20.957(5)
_cell_length_b                    8.1726(17)
_cell_length_c                    22.929(5)
_cell_angle_alpha                 90
_cell_angle_beta                  106.623(3)
_cell_angle_gamma                 90
_cell_volume                      3763.1(14)
_cell_formula_units_Z             4
_cell_measurement_reflns_used     6940
_cell_measurement_temperature     100(2)
_cell_measurement_theta_max       25.11
_cell_measurement_theta_min       2.32
_shelx_estimated_absorpt_T_max    0.949
_shelx_estimated_absorpt_T_min    0.676
_exptl_absorpt_coefficient_mu     2.655
_exptl_absorpt_correction_T_max   1.0000
_exptl_absorpt_correction_T_min   0.6130
_exptl_absorpt_correction_type    'multi-scan'
_exptl_absorpt_process_details
;
SADABS-2014/5 (Bruker,2014/5) was used for absorption correction.
wR2(int) was 0.1133 before and 0.0711 after correction.
The Ratio of minimum to maximum transmission is 0.6130.
The \l/2 correction factor is Not present.
;
_exptl_absorpt_special_details    ?
_exptl_crystal_colour             yellow
_exptl_crystal_density_diffrn     1.585
_exptl_crystal_density_meas       ?
_exptl_crystal_density_method     'not measured'
_exptl_crystal_description        platelet
_exptl_crystal_F_000              1816
_exptl_crystal_size_max           0.16
_exptl_crystal_size_mid           0.08
_exptl_crystal_size_min           0.02
_exptl_special_details
;
 ? 
;
_exptl_transmission_factor_max    ?
_exptl_transmission_factor_min    ?
_diffrn_reflns_av_R_equivalents   0.1164
_diffrn_reflns_av_unetI/netI      0.0882
_diffrn_reflns_Laue_measured_fraction_full 1.000
_diffrn_reflns_Laue_measured_fraction_max 1.000
_diffrn_reflns_limit_h_max        25
_diffrn_reflns_limit_h_min        -25
_diffrn_reflns_limit_k_max        10
_diffrn_reflns_limit_k_min        -9
_diffrn_reflns_limit_l_max        28
_diffrn_reflns_limit_l_min        -28
_diffrn_reflns_number             46711
_diffrn_reflns_point_group_measured_fraction_full 1.000
_diffrn_reflns_point_group_measured_fraction_max 1.000
_diffrn_reflns_theta_full         25.242
_diffrn_reflns_theta_max          25.997
_diffrn_reflns_theta_min          1.162
_diffrn_ambient_temperature       100.15
_diffrn_measured_fraction_theta_full 1.000
_diffrn_measured_fraction_theta_max 1.000
_diffrn_radiation_source          'ImuS high brilliance micro-focus tube' 
_diffrn_radiation_monochromator   'Quazar focussing montel optics' 
_diffrn_measurement_device_type   'Bruker Kappa APEX II CCD area detector'
_diffrn_measurement_method        'phi and omega scans'
_diffrn_detector_area_resol_mean  83.33 
_diffrn_radiation_type            MoK\a
_diffrn_radiation_wavelength      0.71073
_diffrn_standards_number          0
_reflns_Friedel_coverage          0.000
_reflns_Friedel_fraction_full     .
_reflns_Friedel_fraction_max      .
_reflns_number_gt                 5351
_reflns_number_total              7389
_reflns_special_details
;
 Reflections were merged by SHELXL according to the crystal
 class for the calculation of statistics and refinement.
 
 _reflns_Friedel_fraction is defined as the number of unique
 Friedel pairs measured divided by the number that would be
 possible theoretically, ignoring centric projections and
 systematic absences.
;
_reflns_threshold_expression      'I > 2\s(I)'
_computing_data_collection        'Bruker APEX2'
_computing_cell_refinement        'Bruker SAINT' 
_computing_data_reduction         'Bruker SAINT' 
_computing_structure_solution     'SHELXTL 6.12 (Bruker AXS, 2002)'
_computing_structure_refinement   'SHELXL-2014/6 (Sheldrick, 2008)'
_computing_molecular_graphics     'SHELXTL 6.12 (Bruker AXS, 2002)'
_computing_publication_material   'Olex2 (Dolomanov et al., 2009)'
_refine_diff_density_max          1.567
_refine_diff_density_min          -1.487
_refine_diff_density_rms          0.164
_refine_ls_extinction_coef        .
_refine_ls_extinction_method      none
_refine_ls_goodness_of_fit_ref    1.089
_refine_ls_hydrogen_treatment     constr
_refine_ls_matrix_type            full
_refine_ls_number_parameters      468
_refine_ls_number_reflns          7389
_refine_ls_number_restraints      0
_refine_ls_R_factor_all           0.1029
_refine_ls_R_factor_gt            0.0694
_refine_ls_restrained_S_all       1.089
_refine_ls_shift/su_max           0.001
_refine_ls_shift/su_mean          0.000
_refine_ls_structure_factor_coef  Fsqd
_refine_ls_weighting_details
'w=1/[\s^2^(Fo^2^)+(0.0491P)^2^+34.1566P] where P=(Fo^2^+2Fc^2^)/3'
_refine_ls_weighting_scheme       calc
_refine_ls_wR_factor_gt           0.1525
_refine_ls_wR_factor_ref          0.1683
_refine_special_details           ?
_olex2_refinement_description
;
1. Fixed Uiso
 At 1.2 times of:
  All C(H) groups
 At 1.5 times of:
  All C(H,H,H) groups
2.a Ternary CH refined with riding coordinates:
 C26(H26), C29(H29), C38(H38), C41(H41)
2.b Aromatic/amide H refined with riding coordinates:
 C3(H3), C4(H4), C5(H5), C6(H6), C9(H9), C10(H10), C11(H11), C14(H14),
 C15(H15), C16(H16), C17(H17), C22(H22), C23(H23), C24(H24), C34(H34), C35(H35),
  C36(H36)
2.c Idealised Me refined as rotating group:
 C27(H27A,H27B,H27C), C28(H28A,H28B,H28C), C30(H30A,H30B,H30C), C31(H31A,H31B,
 H31C), C39(H39A,H39B,H39C), C40(H40A,H40B,H40C), C42(H42A,H42B,H42C), C43(H43A,
 H43B,H43C)
;
_atom_sites_solution_hydrogens    geom
_atom_sites_solution_primary      ?
_atom_sites_solution_secondary    ?
loop_
  _atom_site_label
  _atom_site_type_symbol
  _atom_site_fract_x
  _atom_site_fract_y
  _atom_site_fract_z
  _atom_site_U_iso_or_equiv
  _atom_site_adp_type
  _atom_site_occupancy
  _atom_site_site_symmetry_order
  _atom_site_calc_flag
  _atom_site_refinement_flags_posn
  _atom_site_refinement_flags_adp
  _atom_site_refinement_flags_occupancy
  _atom_site_disorder_assembly
  _atom_site_disorder_group
 Pd1 Pd 0.45514(3) 0.39846(7) 0.68806(2) 0.01613(16) Uani 1 1 d . . . . .
 Br1 Br 0.39799(4) 0.27131(11) 0.75269(4) 0.0301(2) Uani 1 1 d . . . . .
 Br2 Br 0.55055(5) 0.14359(12) 0.60800(4) 0.0405(3) Uani 1 1 d . . . . .
 N1 N 0.5862(3) 0.3530(7) 0.7981(3) 0.0166(13) Uani 1 1 d . . . . .
 N2 N 0.5906(3) 0.4952(7) 0.7196(3) 0.0170(13) Uani 1 1 d . . . . .
 N3 N 0.5001(3) 0.5239(7) 0.6375(3) 0.0160(13) Uani 1 1 d . . . . .
 N4 N 0.3986(3) 0.5184(7) 0.5681(3) 0.0163(13) Uani 1 1 d . . . . .
 N5 N 0.3147(3) 0.3947(7) 0.5867(2) 0.0156(12) Uani 1 1 d . . . . .
 C1 C 0.5490(4) 0.4074(9) 0.7451(3) 0.0187(15) Uani 1 1 d . . . . .
 C2 C 0.6531(3) 0.4035(9) 0.8086(3) 0.0184(15) Uani 1 1 d . . . . .
 C3 C 0.7081(4) 0.3792(10) 0.8584(3) 0.0252(18) Uani 1 1 d . . . . .
 H3 H 0.7060 0.3145 0.8923 0.030 Uiso 1 1 calc R . . . .
 C4 C 0.7661(4) 0.4551(10) 0.8557(4) 0.0251(18) Uani 1 1 d . . . . .
 H4 H 0.8049 0.4428 0.8891 0.030 Uiso 1 1 calc R . . . .
 C5 C 0.7701(4) 0.5484(10) 0.8064(3) 0.0237(17) Uani 1 1 d . . . . .
 H5 H 0.8111 0.5987 0.8068 0.028 Uiso 1 1 calc R . . . .
 C6 C 0.7152(4) 0.5687(9) 0.7569(3) 0.0214(16) Uani 1 1 d . . . . .
 H6 H 0.7180 0.6314 0.7228 0.026 Uiso 1 1 calc R . . . .
 C7 C 0.6555(3) 0.4954(9) 0.7578(3) 0.0179(15) Uani 1 1 d . . . . .
 C8 C 0.5648(4) 0.5593(9) 0.6603(3) 0.0186(16) Uani 1 1 d . . . . .
 C9 C 0.5969(4) 0.6518(10) 0.6272(3) 0.0226(17) Uani 1 1 d . . . . .
 H9 H 0.6427 0.6784 0.6431 0.027 Uiso 1 1 calc R . . . .
 C10 C 0.5605(4) 0.7051(10) 0.5702(3) 0.0236(17) Uani 1 1 d . . . . .
 H10 H 0.5815 0.7710 0.5470 0.028 Uiso 1 1 calc R . . . .
 C11 C 0.4940(4) 0.6642(9) 0.5464(3) 0.0213(16) Uani 1 1 d . . . . .
 H11 H 0.4692 0.6988 0.5069 0.026 Uiso 1 1 calc R . . . .
 C12 C 0.4654(3) 0.5728(8) 0.5816(3) 0.0173(15) Uani 1 1 d . . . . .
 C13 C 0.3456(3) 0.5396(8) 0.5156(3) 0.0154(15) Uani 1 1 d . . . . .
 C14 C 0.3376(4) 0.6194(9) 0.4601(3) 0.0217(16) Uani 1 1 d . . . . .
 H14 H 0.3735 0.6746 0.4510 0.026 Uiso 1 1 calc R . . . .
 C15 C 0.2754(4) 0.6138(10) 0.4195(3) 0.0281(18) Uani 1 1 d . . . . .
 H15 H 0.2683 0.6646 0.3809 0.034 Uiso 1 1 calc R . . . .
 C16 C 0.2218(4) 0.5359(10) 0.4328(3) 0.0264(18) Uani 1 1 d . . . . .
 H16 H 0.1792 0.5381 0.4036 0.032 Uiso 1 1 calc R . . . .
 C17 C 0.2293(4) 0.4566(10) 0.4869(3) 0.0237(17) Uani 1 1 d . . . . .
 H17 H 0.1932 0.4016 0.4958 0.028 Uiso 1 1 calc R . . . .
 C18 C 0.2917(4) 0.4610(9) 0.5276(3) 0.0176(15) Uani 1 1 d . . . . .
 C19 C 0.3791(3) 0.4301(8) 0.6121(3) 0.0150(15) Uani 1 1 d . . . . .
 C20 C 0.5664(3) 0.2495(9) 0.8409(3) 0.0198(16) Uani 1 1 d . . . . .
 C21 C 0.5555(4) 0.0845(10) 0.8277(3) 0.0253(18) Uani 1 1 d . . . . .
 C22 C 0.5414(4) -0.0134(10) 0.8721(4) 0.0271(18) Uani 1 1 d . . . . .
 H22 H 0.5332 -0.1269 0.8645 0.032 Uiso 1 1 calc R . . . .
 C23 C 0.5391(4) 0.0515(10) 0.9264(4) 0.0294(19) Uani 1 1 d . . . . .
 H23 H 0.5308 -0.0183 0.9565 0.035 Uiso 1 1 calc R . . . .
 C24 C 0.5485(4) 0.2147(10) 0.9380(3) 0.0269(18) Uani 1 1 d . . . . .
 H24 H 0.5464 0.2567 0.9760 0.032 Uiso 1 1 calc R . . . .
 C25 C 0.5610(4) 0.3207(10) 0.8951(3) 0.0226(17) Uani 1 1 d . . . . .
 C26 C 0.5591(4) 0.0079(10) 0.7683(4) 0.031(2) Uani 1 1 d . . . . .
 H26 H 0.5540 0.0969 0.7374 0.037 Uiso 1 1 calc R . . . .
 C27 C 0.5039(5) -0.1174(13) 0.7440(5) 0.057(3) Uani 1 1 d . . . . .
 H27A H 0.4640 -0.0845 0.7552 0.085 Uiso 1 1 calc GR . . . .
 H27B H 0.5188 -0.2250 0.7615 0.085 Uiso 1 1 calc GR . . . .
 H27C H 0.4934 -0.1232 0.6995 0.085 Uiso 1 1 calc GR . . . .
 C28 C 0.6261(4) -0.0746(12) 0.7763(4) 0.039(2) Uani 1 1 d . . . . .
 H28A H 0.6619 0.0058 0.7908 0.059 Uiso 1 1 calc GR . . . .
 H28B H 0.6281 -0.1194 0.7372 0.059 Uiso 1 1 calc GR . . . .
 H28C H 0.6317 -0.1633 0.8061 0.059 Uiso 1 1 calc GR . . . .
 C29 C 0.5639(4) 0.5031(9) 0.9061(4) 0.0254(18) Uani 1 1 d . . . . .
 H29 H 0.5779 0.5563 0.8724 0.030 Uiso 1 1 calc R . . . .
 C30 C 0.6147(5) 0.5489(13) 0.9663(4) 0.051(3) Uani 1 1 d . . . . .
 H30A H 0.6589 0.5100 0.9662 0.076 Uiso 1 1 calc GR . . . .
 H30B H 0.6021 0.4980 1.0001 0.076 Uiso 1 1 calc GR . . . .
 H30C H 0.6157 0.6681 0.9712 0.076 Uiso 1 1 calc GR . . . .
 C31 C 0.4949(5) 0.5634(11) 0.9028(5) 0.042(2) Uani 1 1 d . . . . .
 H31A H 0.4652 0.5442 0.8618 0.063 Uiso 1 1 calc GR . . . .
 H31B H 0.4966 0.6808 0.9118 0.063 Uiso 1 1 calc GR . . . .
 H31C H 0.4782 0.5043 0.9326 0.063 Uiso 1 1 calc GR . . . .
 C32 C 0.2722(3) 0.2898(9) 0.6102(3) 0.0174(15) Uani 1 1 d . . . . .
 C33 C 0.2827(4) 0.1224(9) 0.6088(3) 0.0231(17) Uani 1 1 d . . . . .
 C34 C 0.2379(4) 0.0229(11) 0.6271(3) 0.0277(18) Uani 1 1 d . . . . .
 H34 H 0.2427 -0.0927 0.6268 0.033 Uiso 1 1 calc R . . . .
 C35 C 0.1865(4) 0.0912(11) 0.6454(4) 0.0309(19) Uani 1 1 d . . . . .
 H35 H 0.1559 0.0213 0.6568 0.037 Uiso 1 1 calc R . . . .
 C36 C 0.1786(4) 0.2559(10) 0.6475(4) 0.0274(18) Uani 1 1 d . . . . .
 H36 H 0.1434 0.2993 0.6614 0.033 Uiso 1 1 calc R . . . .
 C37 C 0.2220(3) 0.3624(9) 0.6293(3) 0.0217(17) Uani 1 1 d . . . . .
 C38 C 0.3401(4) 0.0482(10) 0.5893(4) 0.0304(19) Uani 1 1 d . . . . .
 H38 H 0.3793 0.1218 0.6057 0.037 Uiso 1 1 calc R . . . .
 C39 C 0.3280(5) 0.0430(11) 0.5213(4) 0.039(2) Uani 1 1 d . . . . .
 H39A H 0.3693 0.0134 0.5120 0.058 Uiso 1 1 calc GR . . . .
 H39B H 0.3130 0.1508 0.5040 0.058 Uiso 1 1 calc GR . . . .
 H39C H 0.2936 -0.0387 0.5036 0.058 Uiso 1 1 calc GR . . . .
 C40 C 0.3604(4) -0.1188(11) 0.6169(4) 0.035(2) Uani 1 1 d . . . . .
 H40A H 0.4019 -0.1527 0.6086 0.053 Uiso 1 1 calc GR . . . .
 H40B H 0.3252 -0.1982 0.5989 0.053 Uiso 1 1 calc GR . . . .
 H40C H 0.3673 -0.1138 0.6609 0.053 Uiso 1 1 calc GR . . . .
 C41 C 0.2148(4) 0.5451(10) 0.6339(3) 0.0233(17) Uani 1 1 d . . . . .
 H41 H 0.2421 0.5980 0.6098 0.028 Uiso 1 1 calc R . . . .
 C42 C 0.1426(4) 0.6026(11) 0.6075(4) 0.0298(19) Uani 1 1 d . . . . .
 H42A H 0.1241 0.5561 0.5668 0.045 Uiso 1 1 calc GR . . . .
 H42B H 0.1415 0.7223 0.6049 0.045 Uiso 1 1 calc GR . . . .
 H42C H 0.1161 0.5662 0.6340 0.045 Uiso 1 1 calc GR . . . .
 C43 C 0.2435(4) 0.5957(11) 0.6998(4) 0.0320(19) Uani 1 1 d . . . . .
 H43A H 0.2905 0.5637 0.7140 0.048 Uiso 1 1 calc GR . . . .
 H43B H 0.2188 0.5414 0.7247 0.048 Uiso 1 1 calc GR . . . .
 H43C H 0.2398 0.7146 0.7033 0.048 Uiso 1 1 calc GR . . . .

loop_
  _atom_site_aniso_label
  _atom_site_aniso_U_11
  _atom_site_aniso_U_22
  _atom_site_aniso_U_33
  _atom_site_aniso_U_23
  _atom_site_aniso_U_13
  _atom_site_aniso_U_12
 Pd1 0.0154(3) 0.0134(3) 0.0170(3) 0.0027(2) 0.0005(2) -0.0001(2)
 Br1 0.0257(4) 0.0341(5) 0.0293(4) 0.0078(4) 0.0059(3) -0.0010(4)
 Br2 0.0549(6) 0.0317(5) 0.0351(5) 0.0053(4) 0.0130(4) 0.0033(4)
 N1 0.015(3) 0.015(3) 0.018(3) 0.001(2) 0.001(2) 0.002(2)
 N2 0.018(3) 0.015(3) 0.016(3) -0.002(2) 0.001(2) 0.000(3)
 N3 0.017(3) 0.008(3) 0.018(3) -0.001(2) -0.002(2) 0.002(2)
 N4 0.019(3) 0.010(3) 0.019(3) -0.002(2) 0.004(2) -0.003(3)
 N5 0.017(3) 0.014(3) 0.014(3) -0.001(2) 0.001(2) -0.003(3)
 C1 0.024(4) 0.009(4) 0.026(4) -0.006(3) 0.011(3) 0.001(3)
 C2 0.017(3) 0.016(4) 0.019(4) -0.004(3) 0.001(3) 0.001(3)
 C3 0.028(4) 0.023(4) 0.019(4) -0.011(3) -0.002(3) 0.003(4)
 C4 0.016(4) 0.025(4) 0.028(4) -0.007(3) -0.003(3) 0.006(3)
 C5 0.015(4) 0.031(5) 0.025(4) -0.007(3) 0.004(3) 0.000(3)
 C6 0.023(4) 0.020(4) 0.021(4) -0.002(3) 0.007(3) 0.000(3)
 C7 0.017(4) 0.012(4) 0.023(4) -0.001(3) 0.003(3) 0.002(3)
 C8 0.023(4) 0.014(4) 0.015(4) -0.002(3) 0.000(3) 0.002(3)
 C9 0.013(3) 0.029(4) 0.023(4) -0.001(3) 0.002(3) -0.009(3)
 C10 0.027(4) 0.022(4) 0.024(4) 0.000(3) 0.011(3) -0.003(3)
 C11 0.024(4) 0.022(4) 0.017(4) 0.004(3) 0.004(3) -0.002(3)
 C12 0.017(3) 0.012(4) 0.020(4) -0.004(3) -0.001(3) -0.001(3)
 C13 0.018(3) 0.009(3) 0.017(4) -0.001(3) 0.001(3) 0.007(3)
 C14 0.030(4) 0.013(4) 0.020(4) -0.001(3) 0.005(3) -0.004(3)
 C15 0.040(5) 0.024(4) 0.017(4) 0.005(3) 0.002(3) 0.002(4)
 C16 0.025(4) 0.028(5) 0.020(4) 0.001(3) -0.002(3) -0.003(4)
 C17 0.021(4) 0.024(4) 0.021(4) -0.001(3) -0.002(3) -0.005(3)
 C18 0.021(4) 0.015(4) 0.014(3) -0.003(3) 0.000(3) 0.005(3)
 C19 0.019(3) 0.011(4) 0.014(3) 0.003(3) 0.002(3) 0.000(3)
 C20 0.015(4) 0.019(4) 0.021(4) 0.006(3) -0.001(3) 0.001(3)
 C21 0.023(4) 0.025(5) 0.022(4) 0.003(3) -0.003(3) 0.002(3)
 C22 0.029(4) 0.015(4) 0.032(4) 0.005(3) 0.000(4) -0.001(3)
 C23 0.025(4) 0.027(5) 0.039(5) 0.016(4) 0.014(4) 0.009(4)
 C24 0.023(4) 0.034(5) 0.020(4) 0.005(3) 0.000(3) 0.004(4)
 C25 0.016(4) 0.030(5) 0.020(4) 0.005(3) 0.003(3) -0.002(3)
 C26 0.042(5) 0.019(4) 0.025(4) 0.001(3) -0.002(4) 0.002(4)
 C27 0.036(5) 0.056(7) 0.071(7) -0.039(6) 0.004(5) -0.001(5)
 C28 0.040(5) 0.050(6) 0.029(5) -0.011(4) 0.012(4) -0.009(5)
 C29 0.029(4) 0.018(4) 0.029(4) -0.003(3) 0.008(3) 0.002(3)
 C30 0.060(7) 0.051(7) 0.040(6) -0.018(5) 0.014(5) -0.014(5)
 C31 0.051(6) 0.021(5) 0.062(6) 0.003(4) 0.027(5) 0.005(4)
 C32 0.018(4) 0.014(4) 0.015(4) 0.001(3) -0.002(3) -0.006(3)
 C33 0.025(4) 0.020(4) 0.018(4) 0.001(3) -0.003(3) -0.006(3)
 C34 0.028(4) 0.024(5) 0.026(4) -0.001(3) -0.001(3) -0.001(4)
 C35 0.023(4) 0.032(5) 0.035(5) 0.010(4) 0.003(3) -0.008(4)
 C36 0.021(4) 0.027(5) 0.033(5) 0.004(4) 0.006(3) -0.001(4)
 C37 0.016(4) 0.023(4) 0.020(4) 0.001(3) -0.006(3) -0.004(3)
 C38 0.036(5) 0.020(4) 0.035(5) -0.002(4) 0.009(4) -0.001(4)
 C39 0.050(6) 0.025(5) 0.042(5) 0.000(4) 0.012(4) 0.003(4)
 C40 0.030(4) 0.029(5) 0.042(5) 0.002(4) 0.003(4) 0.006(4)
 C41 0.016(4) 0.030(5) 0.023(4) 0.001(3) 0.003(3) 0.000(3)
 C42 0.025(4) 0.034(5) 0.026(4) 0.004(4) 0.001(3) 0.001(4)
 C43 0.027(4) 0.035(5) 0.030(4) 0.001(4) 0.001(4) 0.001(4)

_geom_special_details
;
 All esds (except the esd in the dihedral angle between two l.s. planes)
 are estimated using the full covariance matrix.  The cell esds are taken
 into account individually in the estimation of esds in distances, angles
 and torsion angles; correlations between esds in cell parameters are only
 used when they are defined by crystal symmetry.  An approximate (isotropic)
 treatment of cell esds is used for estimating esds involving l.s. planes.
;
loop_
  _geom_bond_atom_site_label_1
  _geom_bond_atom_site_label_2
  _geom_bond_distance
  _geom_bond_site_symmetry_2
  _geom_bond_publ_flag
 Pd1 Br1 2.3929(10) . ?
 Pd1 N3 1.977(6) . ?
 Pd1 C1 2.027(7) . ?
 Pd1 C19 2.012(7) . ?
 N1 C1 1.321(9) . ?
 N1 C2 1.415(9) . ?
 N1 C20 1.444(9) . ?
 N2 C1 1.380(9) . ?
 N2 C7 1.392(9) . ?
 N2 C8 1.413(9) . ?
 N3 C8 1.338(9) . ?
 N3 C12 1.340(9) . ?
 N4 C12 1.417(9) . ?
 N4 C13 1.395(9) . ?
 N4 C19 1.394(9) . ?
 N5 C18 1.410(9) . ?
 N5 C19 1.340(9) . ?
 N5 C32 1.446(9) . ?
 C2 C3 1.385(10) . ?
 C2 C7 1.400(10) . ?
 C3 H3 0.9500 . ?
 C3 C4 1.382(11) . ?
 C4 H4 0.9500 . ?
 C4 C5 1.387(11) . ?
 C5 H5 0.9500 . ?
 C5 C6 1.376(10) . ?
 C6 H6 0.9500 . ?
 C6 C7 1.393(10) . ?
 C8 C9 1.374(10) . ?
 C9 H9 0.9500 . ?
 C9 C10 1.381(10) . ?
 C10 H10 0.9500 . ?
 C10 C11 1.385(10) . ?
 C11 H11 0.9500 . ?
 C11 C12 1.359(10) . ?
 C13 C14 1.398(10) . ?
 C13 C18 1.392(10) . ?
 C14 H14 0.9500 . ?
 C14 C15 1.370(11) . ?
 C15 H15 0.9500 . ?
 C15 C16 1.398(11) . ?
 C16 H16 0.9500 . ?
 C16 C17 1.368(11) . ?
 C17 H17 0.9500 . ?
 C17 C18 1.374(10) . ?
 C20 C21 1.387(11) . ?
 C20 C25 1.405(11) . ?
 C21 C22 1.391(11) . ?
 C21 C26 1.520(11) . ?
 C22 H22 0.9500 . ?
 C22 C23 1.367(12) . ?
 C23 H23 0.9500 . ?
 C23 C24 1.363(12) . ?
 C24 H24 0.9500 . ?
 C24 C25 1.391(11) . ?
 C25 C29 1.510(11) . ?
 C26 H26 1.0000 . ?
 C26 C27 1.526(12) . ?
 C26 C28 1.522(12) . ?
 C27 H27A 0.9800 . ?
 C27 H27B 0.9800 . ?
 C27 H27C 0.9800 . ?
 C28 H28A 0.9800 . ?
 C28 H28B 0.9800 . ?
 C28 H28C 0.9800 . ?
 C29 H29 1.0000 . ?
 C29 C30 1.529(12) . ?
 C29 C31 1.509(12) . ?
 C30 H30A 0.9800 . ?
 C30 H30B 0.9800 . ?
 C30 H30C 0.9800 . ?
 C31 H31A 0.9800 . ?
 C31 H31B 0.9800 . ?
 C31 H31C 0.9800 . ?
 C32 C33 1.387(11) . ?
 C32 C37 1.385(11) . ?
 C33 C34 1.394(11) . ?
 C33 C38 1.525(11) . ?
 C34 H34 0.9500 . ?
 C34 C35 1.380(12) . ?
 C35 H35 0.9500 . ?
 C35 C36 1.359(12) . ?
 C36 H36 0.9500 . ?
 C36 C37 1.406(11) . ?
 C37 C41 1.507(11) . ?
 C38 H38 1.0000 . ?
 C38 C39 1.507(12) . ?
 C38 C40 1.513(12) . ?
 C39 H39A 0.9800 . ?
 C39 H39B 0.9800 . ?
 C39 H39C 0.9800 . ?
 C40 H40A 0.9800 . ?
 C40 H40B 0.9800 . ?
 C40 H40C 0.9800 . ?
 C41 H41 1.0000 . ?
 C41 C42 1.534(10) . ?
 C41 C43 1.516(11) . ?
 C42 H42A 0.9800 . ?
 C42 H42B 0.9800 . ?
 C42 H42C 0.9800 . ?
 C43 H43A 0.9800 . ?
 C43 H43B 0.9800 . ?
 C43 H43C 0.9800 . ?

loop_
  _geom_angle_atom_site_label_1
  _geom_angle_atom_site_label_2
  _geom_angle_atom_site_label_3
  _geom_angle
  _geom_angle_site_symmetry_1
  _geom_angle_site_symmetry_3
  _geom_angle_publ_flag
 N3 Pd1 Br1 174.50(17) . . ?
 N3 Pd1 C1 79.7(3) . . ?
 N3 Pd1 C19 79.5(3) . . ?
 C1 Pd1 Br1 100.5(2) . . ?
 C19 Pd1 Br1 100.3(2) . . ?
 C19 Pd1 C1 159.2(3) . . ?
 C1 N1 C2 110.7(6) . . ?
 C1 N1 C20 127.9(6) . . ?
 C2 N1 C20 121.3(6) . . ?
 C1 N2 C7 110.9(6) . . ?
 C1 N2 C8 119.1(6) . . ?
 C7 N2 C8 129.8(6) . . ?
 C8 N3 Pd1 118.9(5) . . ?
 C8 N3 C12 121.4(6) . . ?
 C12 N3 Pd1 119.7(5) . . ?
 C13 N4 C12 130.1(6) . . ?
 C19 N4 C12 118.6(6) . . ?
 C19 N4 C13 111.3(6) . . ?
 C18 N5 C32 120.5(6) . . ?
 C19 N5 C18 111.1(6) . . ?
 C19 N5 C32 128.1(6) . . ?
 N1 C1 Pd1 142.2(6) . . ?
 N1 C1 N2 106.6(6) . . ?
 N2 C1 Pd1 111.1(5) . . ?
 C3 C2 N1 130.4(7) . . ?
 C3 C2 C7 123.0(7) . . ?
 C7 C2 N1 106.6(6) . . ?
 C2 C3 H3 122.2 . . ?
 C4 C3 C2 115.7(8) . . ?
 C4 C3 H3 122.2 . . ?
 C3 C4 H4 118.6 . . ?
 C3 C4 C5 122.9(7) . . ?
 C5 C4 H4 118.6 . . ?
 C4 C5 H5 119.7 . . ?
 C6 C5 C4 120.5(7) . . ?
 C6 C5 H5 119.7 . . ?
 C5 C6 H6 120.7 . . ?
 C5 C6 C7 118.6(7) . . ?
 C7 C6 H6 120.7 . . ?
 N2 C7 C2 105.1(6) . . ?
 N2 C7 C6 135.4(7) . . ?
 C6 C7 C2 119.3(6) . . ?
 N3 C8 N2 111.2(6) . . ?
 N3 C8 C9 120.3(6) . . ?
 C9 C8 N2 128.5(7) . . ?
 C8 C9 H9 120.9 . . ?
 C8 C9 C10 118.1(7) . . ?
 C10 C9 H9 120.9 . . ?
 C9 C10 H10 119.4 . . ?
 C9 C10 C11 121.2(7) . . ?
 C11 C10 H10 119.4 . . ?
 C10 C11 H11 121.2 . . ?
 C12 C11 C10 117.6(7) . . ?
 C12 C11 H11 121.2 . . ?
 N3 C12 N4 110.4(6) . . ?
 N3 C12 C11 121.4(6) . . ?
 C11 C12 N4 128.2(6) . . ?
 N4 C13 C14 134.5(7) . . ?
 C18 C13 N4 105.2(6) . . ?
 C18 C13 C14 120.2(6) . . ?
 C13 C14 H14 121.8 . . ?
 C15 C14 C13 116.5(7) . . ?
 C15 C14 H14 121.8 . . ?
 C14 C15 H15 118.8 . . ?
 C14 C15 C16 122.3(7) . . ?
 C16 C15 H15 118.8 . . ?
 C15 C16 H16 119.2 . . ?
 C17 C16 C15 121.5(7) . . ?
 C17 C16 H16 119.2 . . ?
 C16 C17 H17 121.8 . . ?
 C16 C17 C18 116.4(7) . . ?
 C18 C17 H17 121.8 . . ?
 C13 C18 N5 107.1(6) . . ?
 C17 C18 N5 129.9(7) . . ?
 C17 C18 C13 123.1(7) . . ?
 N4 C19 Pd1 111.8(5) . . ?
 N5 C19 Pd1 143.0(5) . . ?
 N5 C19 N4 105.2(5) . . ?
 C21 C20 N1 118.8(7) . . ?
 C21 C20 C25 123.1(7) . . ?
 C25 C20 N1 118.1(7) . . ?
 C20 C21 C22 117.1(7) . . ?
 C20 C21 C26 123.3(7) . . ?
 C22 C21 C26 119.6(7) . . ?
 C21 C22 H22 119.6 . . ?
 C23 C22 C21 120.9(8) . . ?
 C23 C22 H22 119.6 . . ?
 C22 C23 H23 119.4 . . ?
 C24 C23 C22 121.1(8) . . ?
 C24 C23 H23 119.4 . . ?
 C23 C24 H24 119.4 . . ?
 C23 C24 C25 121.1(8) . . ?
 C25 C24 H24 119.4 . . ?
 C20 C25 C29 123.1(7) . . ?
 C24 C25 C20 116.5(7) . . ?
 C24 C25 C29 120.3(7) . . ?
 C21 C26 H26 108.3 . . ?
 C21 C26 C27 112.2(8) . . ?
 C21 C26 C28 110.8(7) . . ?
 C27 C26 H26 108.3 . . ?
 C28 C26 H26 108.3 . . ?
 C28 C26 C27 108.9(7) . . ?
 C26 C27 H27A 109.5 . . ?
 C26 C27 H27B 109.5 . . ?
 C26 C27 H27C 109.5 . . ?
 H27A C27 H27B 109.5 . . ?
 H27A C27 H27C 109.5 . . ?
 H27B C27 H27C 109.5 . . ?
 C26 C28 H28A 109.5 . . ?
 C26 C28 H28B 109.5 . . ?
 C26 C28 H28C 109.5 . . ?
 H28A C28 H28B 109.5 . . ?
 H28A C28 H28C 109.5 . . ?
 H28B C28 H28C 109.5 . . ?
 C25 C29 H29 107.9 . . ?
 C25 C29 C30 112.1(7) . . ?
 C30 C29 H29 107.9 . . ?
 C31 C29 C25 108.7(7) . . ?
 C31 C29 H29 107.9 . . ?
 C31 C29 C30 112.0(8) . . ?
 C29 C30 H30A 109.5 . . ?
 C29 C30 H30B 109.5 . . ?
 C29 C30 H30C 109.5 . . ?
 H30A C30 H30B 109.5 . . ?
 H30A C30 H30C 109.5 . . ?
 H30B C30 H30C 109.5 . . ?
 C29 C31 H31A 109.5 . . ?
 C29 C31 H31B 109.5 . . ?
 C29 C31 H31C 109.5 . . ?
 H31A C31 H31B 109.5 . . ?
 H31A C31 H31C 109.5 . . ?
 H31B C31 H31C 109.5 . . ?
 C33 C32 N5 117.3(7) . . ?
 C37 C32 N5 117.9(6) . . ?
 C37 C32 C33 124.6(7) . . ?
 C32 C33 C34 116.4(7) . . ?
 C32 C33 C38 122.8(7) . . ?
 C34 C33 C38 120.8(7) . . ?
 C33 C34 H34 119.8 . . ?
 C35 C34 C33 120.4(8) . . ?
 C35 C34 H34 119.8 . . ?
 C34 C35 H35 119.1 . . ?
 C36 C35 C34 121.8(8) . . ?
 C36 C35 H35 119.1 . . ?
 C35 C36 H36 119.8 . . ?
 C35 C36 C37 120.4(8) . . ?
 C37 C36 H36 119.8 . . ?
 C32 C37 C36 116.4(7) . . ?
 C32 C37 C41 123.1(7) . . ?
 C36 C37 C41 120.4(7) . . ?
 C33 C38 H38 106.4 . . ?
 C39 C38 C33 113.7(7) . . ?
 C39 C38 H38 106.4 . . ?
 C39 C38 C40 110.5(7) . . ?
 C40 C38 C33 112.8(7) . . ?
 C40 C38 H38 106.4 . . ?
 C38 C39 H39A 109.5 . . ?
 C38 C39 H39B 109.5 . . ?
 C38 C39 H39C 109.5 . . ?
 H39A C39 H39B 109.5 . . ?
 H39A C39 H39C 109.5 . . ?
 H39B C39 H39C 109.5 . . ?
 C38 C40 H40A 109.5 . . ?
 C38 C40 H40B 109.5 . . ?
 C38 C40 H40C 109.5 . . ?
 H40A C40 H40B 109.5 . . ?
 H40A C40 H40C 109.5 . . ?
 H40B C40 H40C 109.5 . . ?
 C37 C41 H41 107.8 . . ?
 C37 C41 C42 112.6(6) . . ?
 C37 C41 C43 108.6(6) . . ?
 C42 C41 H41 107.8 . . ?
 C43 C41 H41 107.8 . . ?
 C43 C41 C42 112.0(7) . . ?
 C41 C42 H42A 109.5 . . ?
 C41 C42 H42B 109.5 . . ?
 C41 C42 H42C 109.5 . . ?
 H42A C42 H42B 109.5 . . ?
 H42A C42 H42C 109.5 . . ?
 H42B C42 H42C 109.5 . . ?
 C41 C43 H43A 109.5 . . ?
 C41 C43 H43B 109.5 . . ?
 C41 C43 H43C 109.5 . . ?
 H43A C43 H43B 109.5 . . ?
 H43A C43 H43C 109.5 . . ?
 H43B C43 H43C 109.5 . . ?

loop_
  _geom_torsion_atom_site_label_1
  _geom_torsion_atom_site_label_2
  _geom_torsion_atom_site_label_3
  _geom_torsion_atom_site_label_4
  _geom_torsion
  _geom_torsion_site_symmetry_1
  _geom_torsion_site_symmetry_2
  _geom_torsion_site_symmetry_3
  _geom_torsion_site_symmetry_4
  _geom_torsion_publ_flag
 Pd1 N3 C8 N2 0.6(8) . . . . ?
 Pd1 N3 C8 C9 -177.4(6) . . . . ?
 Pd1 N3 C12 N4 -1.2(8) . . . . ?
 Pd1 N3 C12 C11 177.6(6) . . . . ?
 N1 C2 C3 C4 -175.7(7) . . . . ?
 N1 C2 C7 N2 -0.1(7) . . . . ?
 N1 C2 C7 C6 176.7(6) . . . . ?
 N1 C20 C21 C22 175.3(6) . . . . ?
 N1 C20 C21 C26 -4.0(11) . . . . ?
 N1 C20 C25 C24 -173.6(6) . . . . ?
 N1 C20 C25 C29 10.3(10) . . . . ?
 N2 C8 C9 C10 -178.1(7) . . . . ?
 N3 C8 C9 C10 -0.5(11) . . . . ?
 N4 C13 C14 C15 -179.0(8) . . . . ?
 N4 C13 C18 N5 -0.4(7) . . . . ?
 N4 C13 C18 C17 179.0(7) . . . . ?
 N5 C32 C33 C34 -175.0(6) . . . . ?
 N5 C32 C33 C38 5.6(10) . . . . ?
 N5 C32 C37 C36 175.3(6) . . . . ?
 N5 C32 C37 C41 -7.5(10) . . . . ?
 C1 N1 C2 C3 177.7(8) . . . . ?
 C1 N1 C2 C7 0.1(8) . . . . ?
 C1 N1 C20 C21 74.3(10) . . . . ?
 C1 N1 C20 C25 -107.6(8) . . . . ?
 C1 N2 C7 C2 0.0(8) . . . . ?
 C1 N2 C7 C6 -176.0(8) . . . . ?
 C1 N2 C8 N3 0.9(9) . . . . ?
 C1 N2 C8 C9 178.7(7) . . . . ?
 C2 N1 C1 Pd1 176.2(7) . . . . ?
 C2 N1 C1 N2 -0.2(8) . . . . ?
 C2 N1 C20 C21 -102.6(8) . . . . ?
 C2 N1 C20 C25 75.5(9) . . . . ?
 C2 C3 C4 C5 -0.7(11) . . . . ?
 C3 C2 C7 N2 -177.8(7) . . . . ?
 C3 C2 C7 C6 -1.0(11) . . . . ?
 C3 C4 C5 C6 -0.4(12) . . . . ?
 C4 C5 C6 C7 0.8(11) . . . . ?
 C5 C6 C7 N2 175.5(8) . . . . ?
 C5 C6 C7 C2 -0.1(11) . . . . ?
 C7 N2 C1 Pd1 -177.5(5) . . . . ?
 C7 N2 C1 N1 0.1(8) . . . . ?
 C7 N2 C8 N3 175.6(7) . . . . ?
 C7 N2 C8 C9 -6.6(13) . . . . ?
 C7 C2 C3 C4 1.4(11) . . . . ?
 C8 N2 C1 Pd1 -1.8(8) . . . . ?
 C8 N2 C1 N1 175.8(6) . . . . ?
 C8 N2 C7 C2 -175.1(7) . . . . ?
 C8 N2 C7 C6 8.9(13) . . . . ?
 C8 N3 C12 N4 179.3(6) . . . . ?
 C8 N3 C12 C11 -1.8(11) . . . . ?
 C8 C9 C10 C11 -1.2(12) . . . . ?
 C9 C10 C11 C12 1.4(12) . . . . ?
 C10 C11 C12 N3 0.1(11) . . . . ?
 C10 C11 C12 N4 178.7(7) . . . . ?
 C12 N3 C8 N2 180.0(6) . . . . ?
 C12 N3 C8 C9 2.0(11) . . . . ?
 C12 N4 C13 C14 -1.2(13) . . . . ?
 C12 N4 C13 C18 -179.8(7) . . . . ?
 C12 N4 C19 Pd1 -0.4(8) . . . . ?
 C12 N4 C19 N5 -179.5(6) . . . . ?
 C13 N4 C12 N3 -179.4(6) . . . . ?
 C13 N4 C12 C11 1.8(12) . . . . ?
 C13 N4 C19 Pd1 180.0(4) . . . . ?
 C13 N4 C19 N5 0.9(8) . . . . ?
 C13 C14 C15 C16 1.4(12) . . . . ?
 C14 C13 C18 N5 -179.3(6) . . . . ?
 C14 C13 C18 C17 0.1(11) . . . . ?
 C14 C15 C16 C17 -1.9(13) . . . . ?
 C15 C16 C17 C18 1.3(12) . . . . ?
 C16 C17 C18 N5 178.7(7) . . . . ?
 C16 C17 C18 C13 -0.5(11) . . . . ?
 C18 N5 C19 Pd1 -179.7(7) . . . . ?
 C18 N5 C19 N4 -1.2(8) . . . . ?
 C18 N5 C32 C33 100.3(8) . . . . ?
 C18 N5 C32 C37 -76.4(8) . . . . ?
 C18 C13 C14 C15 -0.5(10) . . . . ?
 C19 N4 C12 N3 1.1(9) . . . . ?
 C19 N4 C12 C11 -177.7(7) . . . . ?
 C19 N4 C13 C14 178.3(8) . . . . ?
 C19 N4 C13 C18 -0.3(8) . . . . ?
 C19 N5 C18 C13 1.0(8) . . . . ?
 C19 N5 C18 C17 -178.3(8) . . . . ?
 C19 N5 C32 C33 -72.8(9) . . . . ?
 C19 N5 C32 C37 110.4(8) . . . . ?
 C20 N1 C1 Pd1 -1.0(13) . . . . ?
 C20 N1 C1 N2 -177.4(6) . . . . ?
 C20 N1 C2 C3 -4.9(12) . . . . ?
 C20 N1 C2 C7 177.6(6) . . . . ?
 C20 C21 C22 C23 -0.6(11) . . . . ?
 C20 C21 C26 C27 -139.2(8) . . . . ?
 C20 C21 C26 C28 98.9(9) . . . . ?
 C20 C25 C29 C30 -128.5(8) . . . . ?
 C20 C25 C29 C31 107.1(9) . . . . ?
 C21 C20 C25 C24 4.4(11) . . . . ?
 C21 C20 C25 C29 -171.7(7) . . . . ?
 C21 C22 C23 C24 2.1(12) . . . . ?
 C22 C21 C26 C27 41.5(10) . . . . ?
 C22 C21 C26 C28 -80.4(9) . . . . ?
 C22 C23 C24 C25 -0.3(12) . . . . ?
 C23 C24 C25 C20 -2.8(11) . . . . ?
 C23 C24 C25 C29 173.4(7) . . . . ?
 C24 C25 C29 C30 55.6(10) . . . . ?
 C24 C25 C29 C31 -68.9(9) . . . . ?
 C25 C20 C21 C22 -2.7(11) . . . . ?
 C25 C20 C21 C26 178.0(7) . . . . ?
 C26 C21 C22 C23 178.8(7) . . . . ?
 C32 N5 C18 C13 -173.2(6) . . . . ?
 C32 N5 C18 C17 7.5(11) . . . . ?
 C32 N5 C19 Pd1 -6.0(13) . . . . ?
 C32 N5 C19 N4 172.5(6) . . . . ?
 C32 C33 C34 C35 -0.2(11) . . . . ?
 C32 C33 C38 C39 -78.9(10) . . . . ?
 C32 C33 C38 C40 154.2(7) . . . . ?
 C32 C37 C41 C42 135.3(7) . . . . ?
 C32 C37 C41 C43 -100.0(8) . . . . ?
 C33 C32 C37 C36 -1.2(11) . . . . ?
 C33 C32 C37 C41 176.0(7) . . . . ?
 C33 C34 C35 C36 -1.3(12) . . . . ?
 C34 C33 C38 C39 101.7(9) . . . . ?
 C34 C33 C38 C40 -25.2(10) . . . . ?
 C34 C35 C36 C37 1.7(13) . . . . ?
 C35 C36 C37 C32 -0.5(11) . . . . ?
 C35 C36 C37 C41 -177.8(7) . . . . ?
 C36 C37 C41 C42 -47.6(10) . . . . ?
 C36 C37 C41 C43 77.0(8) . . . . ?
 C37 C32 C33 C34 1.5(11) . . . . ?
 C37 C32 C33 C38 -177.9(7) . . . . ?
 C38 C33 C34 C35 179.2(7) . . . . ?

_shelx_res_file
;
TITL DM1603 in P2(1)/n, D.MUNZ, MD50
CELL 0.71073 20.9574 8.1726 22.9293 90 106.623 90
ZERR 4 0.0045 0.0017 0.0049 0 0.003 0
LATT 1
SYMM 0.5-X,0.5+Y,0.5-Z
SFAC C H N Br Pd
UNIT 172 180 20 8 4

L.S. 10
PLAN  20
SIZE 0.16 0.08 0.02
TEMP -173
BOND .5 $H
HTAB
CONF
WPDB -1
LIST 4
fmap 2
acta
MORE -1
OMIT -3 52
REM <olex2.extras>
REM <HklSrc "%.\\dm1603.hkl">
REM </olex2.extras>

WGHT    0.049100   34.156590
FVAR       0.17652
PD1   5    0.455144    0.398459    0.688061    11.00000    0.01536    0.01343 =
         0.01703    0.00267    0.00051   -0.00008
BR1   4    0.397989    0.271310    0.752688    11.00000    0.02568    0.03407 =
         0.02928    0.00777    0.00588   -0.00095
BR2   4    0.550549    0.143594    0.608003    11.00000    0.05492    0.03170 =
         0.03511    0.00527    0.01302    0.00327
N1    3    0.586217    0.352975    0.798127    11.00000    0.01475    0.01513 =
         0.01762    0.00066    0.00100    0.00162
N2    3    0.590569    0.495240    0.719642    11.00000    0.01817    0.01461 =
         0.01567   -0.00163    0.00058   -0.00041
N3    3    0.500132    0.523900    0.637516    11.00000    0.01732    0.00834 =
         0.01826   -0.00054   -0.00153    0.00246
N4    3    0.398573    0.518398    0.568064    11.00000    0.01878    0.00960 =
         0.01947   -0.00218    0.00369   -0.00281
N5    3    0.314716    0.394738    0.586704    11.00000    0.01675    0.01392 =
         0.01386   -0.00086    0.00060   -0.00315
C1    1    0.548976    0.407439    0.745070    11.00000    0.02358    0.00867 =
         0.02604   -0.00551    0.01077    0.00072
C2    1    0.653123    0.403475    0.808623    11.00000    0.01728    0.01600 =
         0.01949   -0.00379    0.00143    0.00081
C3    1    0.708081    0.379184    0.858433    11.00000    0.02804    0.02321 =
         0.01892   -0.01104   -0.00183    0.00321
AFIX  43
H3    2    0.706033    0.314509    0.892277    11.00000   -1.20000
AFIX   0
C4    1    0.766115    0.455114    0.855734    11.00000    0.01641    0.02513 =
         0.02776   -0.00739   -0.00318    0.00581
AFIX  43
H4    2    0.804945    0.442831    0.889145    11.00000   -1.20000
AFIX   0
C5    1    0.770132    0.548421    0.806394    11.00000    0.01461    0.03059 =
         0.02496   -0.00725    0.00428    0.00024
AFIX  43
H5    2    0.811119    0.598735    0.806792    11.00000   -1.20000
AFIX   0
C6    1    0.715238    0.568725    0.756864    11.00000    0.02303    0.01998 =
         0.02141   -0.00233    0.00651   -0.00030
AFIX  43
H6    2    0.717995    0.631419    0.722779    11.00000   -1.20000
AFIX   0
C7    1    0.655537    0.495371    0.757779    11.00000    0.01747    0.01170 =
         0.02310   -0.00149    0.00340    0.00169
C8    1    0.564816    0.559328    0.660286    11.00000    0.02302    0.01433 =
         0.01490   -0.00236   -0.00043    0.00161
C9    1    0.596850    0.651845    0.627206    11.00000    0.01349    0.02933 =
         0.02310   -0.00143    0.00241   -0.00880
AFIX  43
H9    2    0.642691    0.678398    0.643088    11.00000   -1.20000
AFIX   0
C10   1    0.560514    0.705103    0.570233    11.00000    0.02680    0.02209 =
         0.02415    0.00036    0.01092   -0.00327
AFIX  43
H10   2    0.581514    0.770974    0.546965    11.00000   -1.20000
AFIX   0
C11   1    0.493999    0.664176    0.546421    11.00000    0.02354    0.02183 =
         0.01713    0.00400    0.00376   -0.00189
AFIX  43
H11   2    0.469238    0.698786    0.506869    11.00000   -1.20000
AFIX   0
C12   1    0.465415    0.572753    0.581643    11.00000    0.01697    0.01152 =
         0.01964   -0.00393   -0.00077   -0.00056
C13   1    0.345559    0.539600    0.515616    11.00000    0.01789    0.00902 =
         0.01681   -0.00086    0.00080    0.00692
C14   1    0.337629    0.619380    0.460079    11.00000    0.03025    0.01331 =
         0.01981   -0.00132    0.00451   -0.00358
AFIX  43
H14   2    0.373516    0.674572    0.450977    11.00000   -1.20000
AFIX   0
C15   1    0.275374    0.613786    0.419464    11.00000    0.04013    0.02363 =
         0.01662    0.00506    0.00193    0.00186
AFIX  43
H15   2    0.268348    0.664639    0.380882    11.00000   -1.20000
AFIX   0
C16   1    0.221799    0.535889    0.432775    11.00000    0.02544    0.02817 =
         0.02026    0.00085   -0.00200   -0.00302
AFIX  43
H16   2    0.179235    0.538059    0.403581    11.00000   -1.20000
AFIX   0
C17   1    0.229263    0.456647    0.486852    11.00000    0.02125    0.02356 =
         0.02131   -0.00134   -0.00180   -0.00455
AFIX  43
H17   2    0.193229    0.401601    0.495752    11.00000   -1.20000
AFIX   0
C18   1    0.291733    0.460988    0.527619    11.00000    0.02139    0.01514 =
         0.01353   -0.00316    0.00047    0.00508
C19   1    0.379147    0.430083    0.612139    11.00000    0.01871    0.01080 =
         0.01402    0.00288    0.00229    0.00042
C20   1    0.566366    0.249547    0.840944    11.00000    0.01531    0.01902 =
         0.02150    0.00557   -0.00057    0.00131
C21   1    0.555485    0.084518    0.827694    11.00000    0.02283    0.02519 =
         0.02204    0.00290   -0.00287    0.00181
C22   1    0.541360   -0.013411    0.872075    11.00000    0.02885    0.01542 =
         0.03155    0.00532    0.00006   -0.00083
AFIX  43
H22   2    0.533204   -0.126904    0.864535    11.00000   -1.20000
AFIX   0
C23   1    0.539062    0.051491    0.926362    11.00000    0.02451    0.02701 =
         0.03946    0.01623    0.01361    0.00870
AFIX  43
H23   2    0.530769   -0.018311    0.956518    11.00000   -1.20000
AFIX   0
C24   1    0.548468    0.214689    0.937994    11.00000    0.02338    0.03397 =
         0.01959    0.00458    0.00013    0.00417
AFIX  43
H24   2    0.546432    0.256716    0.976049    11.00000   -1.20000
AFIX   0
C25   1    0.560990    0.320695    0.895105    11.00000    0.01640    0.02968 =
         0.02021    0.00514    0.00288   -0.00211
C26   1    0.559060    0.007908    0.768307    11.00000    0.04210    0.01923 =
         0.02498    0.00143   -0.00170    0.00175
AFIX  13
H26   2    0.554042    0.096870    0.737376    11.00000   -1.20000
AFIX   0
C27   1    0.503903   -0.117410    0.743975    11.00000    0.03572    0.05644 =
         0.07093   -0.03893    0.00427   -0.00143
AFIX 137
H27A  2    0.464040   -0.084520    0.755242    11.00000   -1.50000
H27B  2    0.518791   -0.225003    0.761508    11.00000   -1.50000
H27C  2    0.493447   -0.123208    0.699545    11.00000   -1.50000
AFIX   0
C28   1    0.626150   -0.074622    0.776318    11.00000    0.04041    0.04971 =
         0.02922   -0.01061    0.01178   -0.00876
AFIX 137
H28A  2    0.661869    0.005804    0.790792    11.00000   -1.50000
H28B  2    0.628063   -0.119447    0.737212    11.00000   -1.50000
H28C  2    0.631703   -0.163347    0.806107    11.00000   -1.50000
AFIX   0
C29   1    0.563932    0.503109    0.906085    11.00000    0.02941    0.01773 =
         0.02851   -0.00304    0.00750    0.00233
AFIX  13
H29   2    0.577938    0.556340    0.872443    11.00000   -1.20000
AFIX   0
C30   1    0.614726    0.548917    0.966303    11.00000    0.05994    0.05143 =
         0.04019   -0.01801    0.01421   -0.01438
AFIX 137
H30A  2    0.658937    0.510020    0.966232    11.00000   -1.50000
H30B  2    0.602062    0.497987    1.000062    11.00000   -1.50000
H30C  2    0.615727    0.668096    0.971202    11.00000   -1.50000
AFIX   0
C31   1    0.494908    0.563387    0.902777    11.00000    0.05063    0.02100 =
         0.06166    0.00265    0.02693    0.00468
AFIX 137
H31A  2    0.465179    0.544214    0.861806    11.00000   -1.50000
H31B  2    0.496566    0.680783    0.911800    11.00000   -1.50000
H31C  2    0.478164    0.504302    0.932577    11.00000   -1.50000
AFIX   0
C32   1    0.272227    0.289810    0.610156    11.00000    0.01829    0.01410 =
         0.01536    0.00077   -0.00223   -0.00603
C33   1    0.282662    0.122415    0.608840    11.00000    0.02546    0.01957 =
         0.01849    0.00109   -0.00297   -0.00632
C34   1    0.237855    0.022863    0.627050    11.00000    0.02767    0.02431 =
         0.02583   -0.00121   -0.00078   -0.00138
AFIX  43
H34   2    0.242674   -0.092702    0.626846    11.00000   -1.20000
AFIX   0
C35   1    0.186514    0.091248    0.645382    11.00000    0.02253    0.03170 =
         0.03527    0.00962    0.00303   -0.00755
AFIX  43
H35   2    0.155924    0.021302    0.656808    11.00000   -1.20000
AFIX   0
C36   1    0.178561    0.255898    0.647520    11.00000    0.02121    0.02700 =
         0.03317    0.00410    0.00638   -0.00092
AFIX  43
H36   2    0.143440    0.299337    0.661375    11.00000   -1.20000
AFIX   0
C37   1    0.222010    0.362426    0.629345    11.00000    0.01558    0.02252 =
         0.01996    0.00148   -0.00613   -0.00350
C38   1    0.340105    0.048201    0.589294    11.00000    0.03632    0.01971 =
         0.03488   -0.00200    0.00950   -0.00133
AFIX  13
H38   2    0.379279    0.121761    0.605663    11.00000   -1.20000
AFIX   0
C39   1    0.327966    0.042955    0.521277    11.00000    0.04983    0.02461 =
         0.04154   -0.00025    0.01163    0.00256
AFIX 137
H39A  2    0.369333    0.013399    0.512014    11.00000   -1.50000
H39B  2    0.313047    0.150752    0.503968    11.00000   -1.50000
H39C  2    0.293625   -0.038695    0.503625    11.00000   -1.50000
AFIX   0
C40   1    0.360422   -0.118841    0.616850    11.00000    0.02976    0.02857 =
         0.04221    0.00217    0.00264    0.00629
AFIX 137
H40A  2    0.401853   -0.152729    0.608600    11.00000   -1.50000
H40B  2    0.325236   -0.198195    0.598867    11.00000   -1.50000
H40C  2    0.367332   -0.113768    0.660928    11.00000   -1.50000
AFIX   0
C41   1    0.214800    0.545090    0.633859    11.00000    0.01604    0.02973 =
         0.02251    0.00084    0.00302   -0.00009
AFIX  13
H41   2    0.242121    0.598008    0.609797    11.00000   -1.20000
AFIX   0
C42   1    0.142608    0.602610    0.607503    11.00000    0.02515    0.03376 =
         0.02636    0.00387    0.00059    0.00059
AFIX 137
H42A  2    0.124107    0.556071    0.566762    11.00000   -1.50000
H42B  2    0.141509    0.722316    0.604897    11.00000   -1.50000
H42C  2    0.116077    0.566200    0.634008    11.00000   -1.50000
AFIX   0
C43   1    0.243490    0.595683    0.699812    11.00000    0.02721    0.03470 =
         0.02998    0.00069    0.00135    0.00072
AFIX 137
H43A  2    0.290473    0.563721    0.714041    11.00000   -1.50000
H43B  2    0.218789    0.541436    0.724736    11.00000   -1.50000
H43C  2    0.239751    0.714589    0.703286    11.00000   -1.50000
AFIX   0
HKLF 4

REM  DM1603 in P2(1)/n, D.MUNZ, MD50
REM R1 =  0.0694 for    5351 Fo > 4sig(Fo)  and  0.1029 for all    7389 data
REM    468 parameters refined using      0 restraints

END

WGHT      0.0495     34.1313

REM Instructions for potential hydrogen bonds
EQIV $1 -x+1, -y+1, -z+1
HTAB C11 Br2_$1
HTAB C14 Br2_$1

REM Highest difference peak  1.567,  deepest hole -1.487,  1-sigma level  0.164
Q1    1   0.4970  0.2179  0.5787  11.00000  0.05    1.57
Q2    1   0.5832  0.2200  0.6473  11.00000  0.05    1.39
Q3    1   0.4431  0.2974  0.6791  11.00000  0.05    1.37
Q4    1   0.4424  0.4913  0.6777  11.00000  0.05    1.35
Q5    1   0.5778  0.0695  0.5690  11.00000  0.05    1.33
Q6    1   0.4768  0.3940  0.6711  11.00000  0.05    1.25
Q7    1   0.4366  0.3989  0.7059  11.00000  0.05    1.19
Q8    1   0.4278  0.0066  0.5056  11.00000  0.05    1.12
Q9    1   0.5223 -0.0088  0.6287  11.00000  0.05    1.10
Q10   1   0.5000  1.0000  0.5000  10.50000  0.05    0.97
Q11   1   0.4206  0.1524  0.7618  11.00000  0.05    0.90
Q12   1   0.4743  0.3908  0.7150  11.00000  0.05    0.81
Q13   1   0.5418  0.0033  0.6018  11.00000  0.05    0.81
Q14   1   0.2808 -0.0370  0.5222  11.00000  0.05    0.75
Q15   1   0.5005  0.0626  0.5925  11.00000  0.05    0.72
Q16   1   0.3647  0.3793  0.7382  11.00000  0.05    0.69
Q17   1   0.4579  0.5978  0.6703  11.00000  0.05    0.69
Q18   1   0.5143  0.0770  0.5676  11.00000  0.05    0.68
Q19   1   0.5204  0.4180  0.6500  11.00000  0.05    0.67
Q20   1   0.3770  0.1514  0.7383  11.00000  0.05    0.67
;
_shelx_res_checksum               91411
_shelx_hkl_file
;
  -1   0   0   -0.30    0.90
   2   0   0 1912.41  196.68
  -2   0   0 1773.12  196.78
   2   0   0 1795.92  196.88
  -2   0   0 1811.52  196.78
  -2   0   0 1973.00  196.68
   3   0   0   -1.20    2.40
  -3   0   0    2.00    1.80
   3   0   0   -5.60    2.30
  -3   0   0    0.30    2.60
  -3   0   0    1.60    1.90
  -3   0   0   -1.00    3.20
   3   0   0   -0.20    2.10
   4   0   0  476.55   52.49
   4   0   0  470.05   52.69
  -4   0   0  503.55   52.39
  -4   0   0  471.55   52.89
   4   0   0  505.25   52.39
  -4   0   0  515.75   52.39
   5   0   0    1.50    3.70
  -5   0   0    4.60    5.20
  -5   0   0    3.50    2.70
  -5   0   0    6.90    3.10
   5   0   0   -0.70    3.70
   6   0   0 1105.79  122.99
  -6   0   0 1177.08  122.79
  -6   0   0 1119.69  123.29
  -6   0   0 1202.88  122.59
   6   0   0 1156.08  122.89
  -7   0   0    0.10    3.10
  -7   0   0    5.50    6.50
   7   0   0   14.00    4.90
   7   0   0    3.20    4.50
  -7   0   0   10.00    3.80
   8   0   0  661.43   71.19
   8   0   0  657.33   70.99
  -8   0   0  652.83   71.89
  -8   0   0  666.23   70.49
  -8   0   0  663.83   70.79
  -9   0   0    3.00    4.70
  -9   0   0    0.20    3.60
   9   0   0    1.50    5.90
   9   0   0    1.20    5.50
  -9   0   0    2.60    7.70
  10   0   0  629.24   69.99
 -10   0   0  624.04   71.19
 -10   0   0  648.44   69.69
  10   0   0  639.74   70.29
 -10   0   0  687.33   69.29
  11   0   0    0.20    6.90
 -11   0   0   -4.60    8.70
  11   0   0    3.30    6.30
 -11   0   0    1.20    5.40
 -11   0   0   -0.90    3.90
  12   0   0  639.44   68.39
 -12   0   0  649.64   67.39
  12   0   0  633.24   68.79
 -12   0   0  606.84   69.89
 -12   0   0  615.14   68.09
  13   0   0    7.00    7.30
 -13   0   0   -6.60    9.60
  13   0   0    4.90    7.90
 -13   0   0   -6.40    6.00
  14   0   0  202.88   25.10
 -14   0   0  199.68   24.40
  14   0   0  206.08   25.40
 -15   0   0   -4.30    7.60
  15   0   0   -3.50    8.40
  15   0   0  -17.70    8.80
  16   0   0  104.29   16.80
 -16   0   0  113.49   15.70
  16   0   0  113.09   17.40
  17   0   0   -9.30   10.90
  17   0   0   -3.60   10.80
 -17   0   0   15.60    9.50
 -18   0   0  662.33   77.69
  18   0   0  766.02   80.29
 -19   0   0   29.80   11.40
  19   0   0   14.20   15.30
  19   0   0   -5.80   12.50
  20   0   0  575.84   67.59
  20   0   0  623.94   69.19
  21   0   0   -2.60   15.10
 -21   0   0    0.60   12.10
  21   0   0    0.70   14.60
  22   0   0  334.37   43.20
 -22   0   0  322.27   40.30
  22   0   0  339.47   42.40
  23   0   0    5.10   16.70
 -23   0   0    1.40   13.80
 -24   0   0  -11.30   14.50
  24   0   0   -4.10   17.10
  25   0   0  -11.60   20.00
 -25   0   0   28.80   16.40
   0  -1   0    2.50    1.90
   0  -1   0   -1.80    2.40
   0   1   0   -5.10    2.10
   0   1   0    3.10    2.10
  -1  -1   0 1202.88  121.89
  -1  -1   0 1166.58  121.89
  -1  -1   0 1101.59  121.89
  -1  -1   0 1248.78  121.89
   1  -1   0 1150.18  121.99
   1  -1   0 1132.29  122.09
   1  -1   0 1162.98  122.09
   1   1   0 1131.29  121.89
   1   1   0 1201.08  121.89
  -1   1   0 1164.88  121.99
  -1   1   0 1128.39  122.09
   1   1   0 1069.59  121.89
   1   1   0 1129.29  121.89
  -1   1   0 1168.48  121.89
  -1   1   0 1162.88  122.09
   1   1   0 1041.30  121.89
  -2  -1   0  116.79   12.00
   2  -1   0  121.39   12.80
  -2  -1   0   88.19   12.00
  -2   1   0  105.09   12.80
   2   1   0  106.79   12.00
  -2   1   0  112.79   12.30
   2   1   0  115.49   12.00
  -2   1   0  118.99   12.00
   2   1   0  112.59   12.00
   2   1   0   99.39   11.90
  -3  -1   0   30.60    5.10
   3  -1   0   43.00    6.00
  -3  -1   0   47.60    5.10
   3   1   0   25.10    4.30
  -3   1   0   40.50    6.20
  -3   1   0   35.90    4.90
   3   1   0   30.60    5.00
  -3   1   0   44.00    4.90
   3   1   0   42.50    5.10
  -4  -1   0   17.80    4.10
  -4  -1   0   16.40    4.10
   4  -1   0   23.30    5.10
   4   1   0   13.40    3.50
   4   1   0   17.30    4.60
  -4   1   0   19.50    3.70
   4   1   0   15.10    3.00
  -4   1   0   21.90    3.70
   4   1   0   22.00    4.00
  -4   1   0   16.00    5.70
   5  -1   0   85.29   10.20
   5  -1   0   92.39   11.70
  -5  -1   0   97.29   10.20
  -5   1   0   84.39   10.10
   5   1   0   77.79    9.50
   5   1   0   85.19   10.10
   5   1   0   70.39   10.00
  -5   1   0   93.39   11.60
  -5   1   0   73.69   10.00
  -6  -1   0  494.15   49.20
   6  -1   0  462.85   49.20
   6  -1   0  469.95   49.70
   6   1   0  422.36   49.00
  -6   1   0  448.06   49.99
  -6   1   0  467.65   49.00
   6   1   0  442.96   49.00
  -6   1   0  452.75   48.90
   7  -1   0    2.40    5.30
  -7  -1   0   -8.30    4.40
   7  -1   0    5.60    5.50
  -7   1   0   -1.30    3.40
  -7   1   0    0.30    6.70
  -7   1   0    8.50    3.70
   7   1   0   -1.20    4.00
   7   1   0   -0.30    4.50
   8  -1   0  390.66   40.90
   8  -1   0  375.96   41.40
  -8  -1   0  392.06   40.90
  -8   1   0  368.96   40.50
  -8   1   0  368.76   42.10
   8   1   0  339.17   40.70
  -8   1   0  382.06   40.40
   8   1   0  386.16   40.90
   9  -1   0   31.60    7.80
  -9  -1   0   36.40    6.90
   9  -1   0   37.10    7.40
  -9   1   0   27.80    5.40
  -9   1   0   29.50    5.90
  -9   1   0   29.00    9.40
   9   1   0   28.80    7.20
   9   1   0   15.60    6.10
 -10  -1   0  182.28   20.70
  10  -1   0  162.78   20.70
  10  -1   0  200.98   22.20
 -10   1   0  183.68   19.80
  10   1   0  149.59   20.40
  10   1   0  168.08   20.90
 -10   1   0  178.18   20.20
 -10   1   0  163.18   22.80
  11  -1   0  138.79   17.90
  11  -1   0  148.79   16.40
 -11  -1   0  120.39   15.60
  11   1   0  106.49   15.90
 -11   1   0  129.59   15.70
 -11   1   0  130.79   18.60
  11   1   0  119.09   16.10
 -11   1   0  117.49   15.10
  12  -1   0  280.37   33.40
 -12  -1   0  318.07   33.30
  12  -1   0  317.57   34.50
  12   1   0  293.37   33.40
 -12   1   0  287.57   35.50
 -12   1   0  296.27   32.40
  12   1   0  280.37   33.40
 -12   1   0  290.07   32.90
 -13  -1   0  110.09   13.60
  13  -1   0   95.89   14.80
  13  -1   0   85.09   13.70
  13   1   0   84.39   13.20
 -13   1   0   98.79   13.00
 -13   1   0   95.49   12.70
 -13   1   0   91.19   16.40
  13   1   0  117.59   14.50
  14  -1   0   17.00    9.50
 -14  -1   0   14.00    8.00
  14  -1   0   14.10    8.60
  14   1   0   11.70    9.90
 -14   1   0   26.20    5.90
 -14   1   0   19.80    7.10
 -14   1   0   23.50   12.40
  14   1   0   12.60    7.80
  15  -1   0   22.20    9.30
 -15  -1   0   19.80    9.20
  15  -1   0   36.70   11.30
 -15   1   0   23.40    8.10
 -15   1   0   21.70   13.70
  15   1   0   13.60    8.70
 -15   1   0   20.70    6.20
  15   1   0   12.70   10.40
  16  -1   0  123.29   18.60
  16  -1   0  106.79   16.70
 -16  -1   0  116.29   16.30
 -16   1   0  117.09   14.80
  16   1   0  111.29   17.90
  16   1   0  101.79   16.80
 -16   1   0  119.79   15.80
 -16   1   0  112.69   20.90
 -17  -1   0   21.60   10.50
  17  -1   0   35.90   13.60
  17  -1   0   18.80   10.80
 -17   1   0   -5.80   15.70
  17   1   0   34.70   11.70
  17   1   0   20.50   12.20
 -17   1   0   11.40    9.10
 -18  -1   0   97.39   17.80
  18  -1   0  112.79   18.70
  18  -1   0  126.49   24.30
  18   1   0  124.39   19.40
 -18   1   0  140.89   17.80
  18   1   0  135.99   20.20
 -19  -1   0   86.39   15.50
  19  -1   0   87.89   19.60
  19  -1   0   67.99   15.70
  19   1   0   76.59   18.00
 -19   1   0   89.69   14.80
  19   1   0   82.79   19.30
 -20  -1   0  -11.40   11.50
  20  -1   0   -4.10   15.70
  20  -1   0    3.20   11.90
 -20   1   0    9.20   11.10
  20   1   0   -2.60   14.10
  21  -1   0   49.10   14.90
  21  -1   0   36.60   18.50
 -21  -1   0   36.40   13.70
 -21   1   0   50.89   13.70
  21   1   0   44.20   16.70
  22  -1   0   -8.90   18.10
 -22  -1   0    9.00   13.30
  22  -1   0   11.70   14.60
 -22   1   0   -2.90   12.70
  22   1   0   23.80   18.80
 -23  -1   0    5.80   13.80
  23  -1   0   16.00   16.00
  23  -1   0   -2.90   19.10
 -23   1   0   -3.00   13.50
  23   1   0   11.40   18.10
  24  -1   0  -25.60   19.40
 -24  -1   0    1.50   14.40
  24  -1   0    3.30   15.90
 -24   1   0  -10.20   14.30
  24   1   0   -0.10   18.90
  25  -1   0   11.20   18.10
 -25  -1   0   26.60   15.90
 -25   1   0   26.60   15.80
  25   1   0   23.50   20.00
   0  -2   0 2760.32  282.97
   0   2   0 2816.22  282.97
   0   2   0 2416.66  282.97
   1  -2   0   23.20    4.90
  -1  -2   0   11.00    4.20
  -1  -2   0   17.30    5.20
  -1   2   0    4.90    4.70
   1   2   0    7.00    4.10
  -1   2   0    2.30    4.10
  -1   2   0    6.80    3.90
   1   2   0   14.00    3.70
  -2  -2   0  166.68   19.10
  -2  -2   0  166.28   18.90
   2  -2   0  181.48   19.60
  -2   2   0  171.28   19.70
   2   2   0  140.79   19.20
   2   2   0  157.48   18.90
  -2   2   0  168.48   19.20
   2   2   0  184.48   18.60
  -2   2   0  192.48   18.90
   3  -2   0 1949.51  206.08
  -3  -2   0 1928.21  205.68
   3   2   0 2029.80  205.58
  -3   2   0 1991.00  206.18
  -3   2   0 1861.11  205.78
   3   2   0 1849.21  205.68
   3   2   0 1930.71  205.68
  -3   2   0 1914.81  205.68
   3   2   0 1965.10  205.68
   4  -2   0  526.25   55.59
  -4  -2   0  479.85   54.89
   4   2   0  543.55   54.89
  -4   2   0  483.45   55.09
   4   2   0  463.65   54.89
   4   2   0  525.75   54.89
  -4   2   0  527.75   54.99
  -4   2   0  528.25   55.79
   4   2   0  544.35   55.19
  -5  -2   0 1686.03  196.28
   5  -2   0 1840.42  196.88
  -5   2   0 1828.52  196.98
   5   2   0 1951.40  196.28
   5   2   0 1909.21  196.28
  -5   2   0 1880.41  196.28
  -5   2   0 1832.12  196.38
  -6  -2   0  169.78   19.20
   6  -2   0  194.88   20.60
  -6  -2   0  154.78   19.10
  -6   2   0  167.78   20.90
   6   2   0  172.38   19.10
  -6   2   0  176.18   18.90
   6   2   0  153.58   18.60
  -6   2   0  169.78   19.10
  -7  -2   0  512.95   54.89
  -7  -2   0  425.26   54.79
   7  -2   0  538.55   55.79
  -7   2   0  514.25   56.09
   7   2   0  554.54   54.79
   7   2   0  484.55   54.49
  -7   2   0  524.05   54.79
  -7   2   0  544.65   54.79
  -8  -2   0    2.50    6.00
   8  -2   0    2.80    5.90
   8  -2   0   -2.10    7.10
   8   2   0    4.90    6.00
   8   2   0    5.20    4.30
  -8   2   0   -3.10    4.60
  -8   2   0    6.80    4.40
  -8   2   0    1.50    7.80
   9  -2   0   32.40    8.40
  -9  -2   0   43.00    8.40
   9  -2   0   44.90    9.80
   9   2   0   39.40    7.00
  -9   2   0   42.40   10.00
  -9   2   0   50.09    7.30
   9   2   0   51.49    8.50
  -9   2   0   43.30    7.10
 -10  -2   0  313.07   35.90
  10  -2   0  309.47   35.80
  10  -2   0  315.87   36.90
 -10   2   0  322.17   37.70
  10   2   0  340.57   35.90
 -10   2   0  334.87   35.30
  10   2   0  304.17   35.30
 -10   2   0  330.37   35.20
  11  -2   0    8.80    8.30
 -11  -2   0    1.70    7.00
  11  -2   0    5.00    6.90
 -11   2   0   16.00    5.40
  11   2   0    4.80    5.40
 -11   2   0    6.80    5.20
  11   2   0   17.40    7.90
 -11   2   0   16.50   10.10
 -12  -2   0   43.50    9.40
  12  -2   0   54.39    9.70
  12  -2   0   29.50   10.50
 -12   2   0   56.19    8.10
 -12   2   0   46.00    8.30
 -12   2   0   49.20   12.60
  12   2   0   47.80   10.20
  12   2   0   43.30    8.20
 -13  -2   0  282.27   33.20
  13  -2   0  288.07   32.90
  13  -2   0  300.77   35.10
 -13   2   0  281.57   36.00
 -13   2   0  305.57   32.20
 -13   2   0  273.57   32.50
  13   2   0  272.17   32.80
  13   2   0  301.37   33.30
 -14  -2   0   66.59   11.90
  14  -2   0   72.39   12.20
  14  -2   0   73.89   14.00
  14   2   0   73.59   13.10
  14   2   0   48.90   11.00
 -14   2   0   84.59   17.00
 -14   2   0   75.39   10.20
 -14   2   0   55.99   10.50
  15  -2   0  625.74   74.19
  15  -2   0  683.93   76.09
 -15  -2   0  638.14   74.29
 -15   2   0  725.93   73.49
  15   2   0  688.43   74.29
 -15   2   0  672.63   77.19
  15   2   0  719.83   74.59
 -15   2   0  678.73   73.89
 -16  -2   0   -2.10    9.50
  16  -2   0   -2.80   11.70
  16  -2   0   -9.20    9.30
 -16   2   0    3.80    7.30
 -16   2   0    4.50    8.10
  16   2   0   -6.00   11.90
 -16   2   0   -6.20   14.70
  16   2   0   -7.90    8.60
  17  -2   0  318.77   42.20
 -17  -2   0  341.87   42.60
  17  -2   0  421.26   45.10
 -17   2   0  355.06   41.90
  17   2   0  341.97   44.00
  17   2   0  376.56   44.40
 -17   2   0  391.76   48.20
 -17   2   0  394.76   41.10
  18  -2   0   -9.70   15.20
  18  -2   0   13.00   10.70
 -18  -2   0    2.50   11.10
  18   2   0    5.60   13.80
 -18   2   0   13.90    9.80
 -18   2   0  -18.40   17.90
  19  -2   0   65.09   15.50
 -19  -2   0   81.59   15.40
  19  -2   0   61.39   20.10
 -19   2   0   78.99   14.50
  19   2   0   95.59   19.40
 -19   2   0   83.99   23.20
  20  -2   0   18.60   13.30
 -20  -2   0   -3.60   12.30
  20  -2   0   12.20   17.10
 -20   2   0   22.30   12.00
  20   2   0   -5.90   15.80
 -20   2   0   33.60   22.50
  21  -2   0   26.50   13.50
 -21  -2   0   22.30   13.40
  21  -2   0   11.60   17.80
 -21   2   0  -12.20   12.20
  21   2   0   28.20   17.60
 -22  -2   0   21.90   14.10
  22  -2   0  -11.20   19.80
  22  -2   0    7.60   14.30
 -22   2   0   45.10   14.10
  22   2   0    2.70   17.60
  23  -2   0   51.39   16.70
 -23  -2   0   73.09   16.90
  23  -2   0   51.59   25.00
  23   2   0   59.39   22.80
 -23   2   0   68.99   17.20
 -24  -2   0   69.29   17.20
  24  -2   0   30.00   24.90
  24  -2   0   39.40   18.00
 -24   2   0   79.89   18.60
  24   2   0  102.39   23.30
  25  -2   0  -10.60   23.20
 -25  -2   0    4.00   15.40
  25  -2   0   14.60   17.20
 -25   2   0   18.90   16.50
  25   2   0   11.70   23.70
   0  -3   0    5.20    5.60
   0   3   0    1.70    4.40
   0   3   0   -2.00    4.90
   0   3   0   -0.50    5.20
  -1  -3   0   -9.50    4.90
   1  -3   0    2.70    5.80
  -1  -3   0    0.50    6.10
   1   3   0    0.20    4.20
   1   3   0   -1.60    5.00
  -1   3   0    2.30    4.60
  -1   3   0   -1.90    4.80
  -1   3   0   -2.40    5.50
  -2  -3   0    4.80    5.80
   2  -3   0    6.80    6.20
  -2  -3   0   -8.60    5.00
  -2   3   0    0.10    4.70
  -2   3   0    4.60    5.00
   2   3   0    2.60    4.30
   2   3   0    5.30    4.90
  -2   3   0  -11.50    5.60
  -3  -3   0   26.90    6.40
  -3  -3   0   21.20    6.30
   3  -3   0   46.60    8.00
  -3   3   0   38.50    6.30
   3   3   0   35.30    6.30
  -3   3   0   17.50    7.60
  -3   3   0   37.70    6.60
   3   3   0   43.70    5.80
   4  -3   0   14.10    6.90
  -4  -3   0    0.50    5.00
  -4   3   0    5.10    6.90
   4   3   0   -2.10    4.60
  -4   3   0   -3.60    5.00
   4   3   0   10.30    4.50
  -4   3   0    8.10    4.70
   5  -3   0   30.00    7.70
  -5  -3   0    6.70    5.10
  -5   3   0   13.20    5.70
  -5   3   0   -0.20    7.20
   5   3   0   13.60    4.70
   5   3   0    0.70    5.00
  -5   3   0   11.60    4.80
   6  -3   0  388.56   41.20
  -6  -3   0  303.97   39.30
   6   3   0  385.06   39.40
  -6   3   0  364.46   41.00
   6   3   0  375.06   39.40
  -6   3   0  372.36   39.50
  -6   3   0  367.36   39.70
  -7  -3   0   77.89   11.50
   7  -3   0   96.69   13.80
  -7   3   0   91.59   11.50
  -7   3   0   79.89   13.80
   7   3   0   87.09   11.60
  -7   3   0  108.69   12.20
   7   3   0  100.59   12.20
   8  -3   0  308.47   36.70
  -8   3   0  315.77   37.10
   8   3   0  311.77   34.50
  -8   3   0  313.67   35.20
   8   3   0  317.67   35.00
  -8   3   0  336.37   34.90
   8   3   0  317.87   35.20
   9  -3   0   34.50    9.70
   9  -3   0   35.80    8.20
   9   3   0   31.80    5.90
  -9   3   0   24.60   10.10
  -9   3   0   28.50    6.30
   9   3   0   26.30    7.40
  -9   3   0   32.70    7.00
   9   3   0   32.60    8.20
  10  -3   0    6.40    8.70
  10  -3   0    8.30    7.30
 -10   3   0    6.60    6.00
 -10   3   0    6.70    5.40
  10   3   0    3.60    7.50
  10   3   0    7.90    4.70
 -10   3   0    7.40    8.80
 -11  -3   0    3.20    7.60
  11  -3   0    2.50    9.20
  11  -3   0    0.50    7.20
 -11   3   0    9.20    5.60
 -11   3   0    6.80    6.00
 -11   3   0    6.30   10.20
  11   3   0    1.30    5.20
  11   3   0   17.20    8.60
  12  -3   0   64.09   14.00
 -12  -3   0   68.79   12.40
  12  -3   0   82.49   12.50
 -12   3   0   71.99   11.00
  12   3   0   93.09   13.40
 -12   3   0   47.00   14.80
 -12   3   0   92.89   11.30
  12   3   0   79.69   10.90
 -13  -3   0    6.00    9.10
  13  -3   0   16.10    8.80
  13  -3   0    7.50   10.70
 -13   3   0    6.70    6.50
  13   3   0   26.30   10.50
 -13   3   0    8.80   12.80
 -13   3   0   17.80    7.10
  13   3   0    6.70    6.80
 -14  -3   0  220.18   32.60
  14  -3   0  293.97   35.20
  14  -3   0  256.87   32.10
 -14   3   0  261.47   35.70
 -14   3   0  299.57   31.80
  14   3   0  266.77   32.00
  14   3   0  332.67   33.60
 -14   3   0  271.87   31.40
  15  -3   0   82.49   17.40
  15  -3   0   74.89   14.60
 -15  -3   0  101.29   15.50
 -15   3   0   82.59   13.60
  15   3   0   97.79   16.30
 -15   3   0   95.89   20.20
 -15   3   0  100.19   13.50
  16  -3   0   12.70   10.70
  16  -3   0    5.10   13.60
 -16  -3   0    1.60   11.10
 -16   3   0  -17.70   16.20
 -16   3   0    4.50    8.20
  16   3   0   14.40   13.00
 -16   3   0   -1.90    8.40
 -17  -3   0   -5.10   11.20
  17  -3   0   -4.90   10.40
  17  -3   0    5.10   14.70
  17   3   0    5.50   14.60
 -17   3   0  -11.50    8.60
 -17   3   0   -5.00   17.50
 -17   3   0    8.80    9.40
  18  -3   0   -2.00   12.70
  18  -3   0  -14.10   15.40
 -18  -3   0  -12.00   11.60
  18   3   0   18.90   15.60
 -18   3   0   -9.50    9.30
 -18   3   0   -5.40   19.90
 -18   3   0    6.80    9.80
  19  -3   0  -13.50   18.30
 -19  -3   0    4.20   12.50
  19  -3   0    2.20   11.40
 -19   3   0   -8.90   22.30
 -19   3   0    1.70   11.20
  19   3   0    4.80   16.70
  20  -3   0   13.10   18.90
  20  -3   0   25.30   13.40
 -20  -3   0   28.60   13.60
 -20   3   0   10.40   24.40
  20   3   0   14.90   17.00
 -20   3   0   -2.40   11.60
 -21  -3   0    7.10   13.60
  21  -3   0   -8.10   13.40
  21  -3   0  -31.60   19.30
 -21   3   0  -12.60   12.40
  21   3   0    6.00   19.10
 -21   3   0   12.00   25.00
 -22  -3   0   48.00   16.70
  22  -3   0   65.69   17.50
  22  -3   0   42.70   24.50
 -22   3   0  116.09   31.70
 -22   3   0   92.49   17.20
  22   3   0  114.09   23.80
  23  -3   0  -13.00   14.00
 -23  -3   0   31.80   15.30
  23  -3   0  -29.70   20.60
 -23   3   0   -2.30   14.90
  23   3   0   26.90   20.40
  24  -3   0  -27.20   22.50
  24  -3   0    1.30   17.50
 -24  -3   0    7.40   15.20
 -24   3   0   -2.30   16.20
  24   3   0   10.90   22.90
   0  -4   0  233.68   27.40
   0  -4   0  279.67   28.40
   0   4   0  218.18   27.00
   0   4   0  196.18   26.70
   0   4   0  224.48   26.10
  -1  -4   0  165.38   20.90
  -1  -4   0  144.09   20.20
   1  -4   0  194.08   21.30
   1   4   0  163.18   19.80
  -1   4   0  165.18   19.90
  -1   4   0  155.38   19.10
   1   4   0  135.79   19.50
  -1   4   0  147.19   20.40
  -2  -4   0  147.79   20.10
  -2  -4   0  133.59   19.60
   2  -4   0  204.28   21.20
  -2   4   0  144.79   20.00
   2   4   0  171.58   18.30
  -2   4   0  152.58   19.50
  -2   4   0  188.98   18.90
   2   4   0  122.99   18.90
  -3  -4   0  -12.10    7.00
  -3  -4   0   -6.70    6.20
   3  -4   0   13.20    8.50
   3   4   0   11.00    5.40
  -3   4   0   -6.20    7.40
  -3   4   0    0.90    5.70
  -3   4   0   -2.60    6.10
   3   4   0    1.50    5.90
  -4  -4   0  368.76   42.70
   4  -4   0  441.86   44.40
  -4  -4   0  394.26   42.60
  -4   4   0  368.16   42.90
  -4   4   0  407.86   44.30
  -4   4   0  412.86   42.60
   4   4   0  388.56   42.20
   4   4   0  354.06   42.70
   5  -4   0  142.99   18.60
  -5  -4   0  107.99   15.00
  -5   4   0  111.49   16.70
   5   4   0  129.49   14.80
   5   4   0  103.49   15.20
  -5   4   0  138.59   15.50
  -5   4   0  123.99   15.30
  -6  -4   0   90.29   13.30
   6  -4   0  112.59   15.50
  -6   4   0  119.89   13.10
  -6   4   0   98.19   13.40
   6   4   0  108.39   12.80
  -6   4   0   86.29   14.70
   6   4   0   93.59   13.70
   7  -4   0  124.59   16.40
  -7  -4   0   93.29   13.80
  -7   4   0  115.29   13.60
  -7   4   0  117.09   14.20
   7   4   0  116.69   13.50
   7   4   0   88.69   13.70
  -7   4   0   98.59   16.10
   8  -4   0  290.77   36.90
  -8  -4   0  306.97   34.50
   8   4   0  337.47   34.70
  -8   4   0  314.97   34.70
   8   4   0  334.27   34.80
  -8   4   0  277.57   37.00
  -8   4   0  299.07   35.10
   9  -4   0   13.80    9.80
  -9  -4   0    8.40    5.30
  -9   4   0   -1.90    9.00
   9   4   0   14.60    7.80
  -9   4   0    8.00    6.80
  -9   4   0    6.40    5.60
   9   4   0    6.10    6.70
 -10  -4   0  652.63   81.89
  10  -4   0  736.13   83.99
  10  -4   0  821.22   82.39
 -10   4   0  798.12   84.39
  10   4   0  740.03   81.79
  10   4   0  802.32   82.19
  10   4   0  767.92   82.39
 -10   4   0  782.52   82.19
 -10   4   0  807.42   82.49
  11  -4   0   12.40    8.60
  11  -4   0    2.10   10.50
 -11   4   0   12.30    6.40
  11   4   0    4.10    7.80
  11   4   0    1.80    9.50
 -11   4   0   -3.00    9.70
 -11   4   0    0.70    7.70
  11   4   0    3.40    5.70
  12  -4   0  517.25   58.49
  12  -4   0  519.45   60.49
 -12   4   0  597.64   61.79
  12   4   0  505.65   58.39
  12   4   0  512.95   58.79
 -12   4   0  558.34   58.49
 -12   4   0  531.65   58.09
  13  -4   0  118.69   15.40
  13  -4   0   91.79   17.80
  13   4   0   98.79   16.20
 -13   4   0   76.39   17.80
 -13   4   0   98.29   14.30
 -13   4   0   81.19   13.60
  14  -4   0    3.90   13.20
  14  -4   0    4.30   10.00
 -14   4   0   14.40    8.30
 -14   4   0   15.50    8.80
 -14   4   0    3.30   15.60
  14   4   0   18.70   12.20
  15  -4   0    1.90   10.70
  15  -4   0   20.70   15.10
 -15   4   0    6.40    8.80
  15   4   0   36.90   13.90
 -15   4   0   23.60   18.50
 -15   4   0   45.90   10.30
  16  -4   0   12.80   16.60
  16  -4   0   13.00   11.00
 -16   4   0    8.20   10.10
  16   4   0   11.70   14.30
 -16   4   0   -8.20   16.00
 -16   4   0   24.80   10.40
  17  -4   0   18.10   13.40
  17  -4   0  -11.10   16.40
 -17   4   0    7.10   20.60
  17   4   0   19.40   15.40
 -17   4   0    6.60   10.60
 -17   4   0   -4.20   10.20
  18  -4   0  -14.30   17.10
  18  -4   0  -11.00   11.80
 -18   4   0  -16.10   10.20
 -18   4   0   -4.40   10.80
 -18   4   0   10.80   23.90
  18   4   0  -18.40   15.30
  19  -4   0   -3.50   12.90
  19  -4   0  -21.10   18.80
 -19   4   0    4.00   12.00
  19   4   0   42.10   17.60
 -19   4   0   -5.00   24.80
  20  -4   0    2.70   19.50
  20  -4   0    3.30   13.20
 -20   4   0   25.00   14.30
  20   4   0   48.70   18.80
 -20   4   0    7.10   27.70
  21  -4   0   -9.90   23.10
  21  -4   0    4.80   17.20
  21   4   0   31.30   19.80
 -21   4   0   13.50   14.40
 -21   4   0   41.10   29.50
  22  -4   0   50.19   23.10
  22  -4   0   58.59   18.50
  22   4   0   94.19   27.40
 -22   4   0  122.49   20.30
 -22   4   0  135.89   35.50
  23  -4   0  -16.50   23.60
  23  -4   0   -5.40   15.70
 -23   4   0   24.80   15.70
 -23   4   0   44.00   33.70
   0  -5   0    6.20    9.50
   0  -5   0   -5.00   11.00
   0   5   0   14.50    6.80
   0   5   0    0.00    8.10
   0   5   0    2.20    7.10
   1  -5   0   56.89   11.80
  -1  -5   0   35.70   10.70
  -1  -5   0   44.00   12.00
   1  -5   0   55.59   14.50
   1   5   0   46.00   10.00
   1   5   0   27.80    8.60
  -1   5   0   50.69    9.60
   1   5   0   36.60    9.30
  -1   5   0   44.50   10.90
  -1   5   0   56.49    9.20
  -2  -5   0  347.97   42.20
   2  -5   0  347.77   43.10
  -2  -5   0  391.36   42.90
   2   5   0  399.66   41.90
  -2   5   0  393.06   43.10
   2   5   0  366.76   42.00
  -2   5   0  365.66   41.50
  -2   5   0  379.16   41.90
  -3  -5   0  131.89   18.20
   3  -5   0  162.08   20.00
  -3  -5   0  118.39   19.30
   3   5   0  141.09   17.90
  -3   5   0  133.89   17.80
  -3   5   0  137.99   19.70
  -3   5   0  149.49   18.00
   3   5   0  141.49   17.20
  -4  -5   0   78.89   12.70
  -4  -5   0   69.69   12.70
   4  -5   0   81.59   15.10
  -4   5   0   78.99   14.60
  -4   5   0   88.09   12.10
  -4   5   0   80.59   12.60
   4   5   0   81.29   12.20
   4   5   0   98.59   11.50
  -5  -5   0  261.77   32.00
   5  -5   0  291.37   34.80
   5   5   0  276.87   32.00
  -5   5   0  297.67   32.00
  -5   5   0  295.47   34.30
  -5   5   0  282.47   32.60
   5   5   0  279.77   31.40
  -6  -5   0    8.00    6.70
   6  -5   0   24.70   11.50
   6   5   0   15.10    6.80
  -6   5   0    6.00    7.60
   6   5   0   23.10    7.30
  -6   5   0    5.40    6.70
  -6   5   0    5.40    9.80
   7  -5   0   32.80   13.30
  -7  -5   0   49.90    9.40
   7   5   0   55.89    9.70
   7   5   0   55.69    9.40
  -7   5   0   61.19   10.00
  -7   5   0   54.89   10.60
  -7   5   0   63.29   13.90
   8  -5   0   83.89   16.50
  -8  -5   0   75.59   12.40
   8   5   0  113.29   13.10
   8   5   0   86.19   12.80
  -8   5   0  100.89   13.10
  -8   5   0  102.19   17.30
  -8   5   0   93.69   14.00
   9  -5   0  443.56   59.49
  -9  -5   0  588.54   58.89
   9   5   0  527.95   57.19
  -9   5   0  540.05   60.29
   9   5   0  482.65   56.99
  -9   5   0  530.25   57.19
  -9   5   0  535.45   58.29
  10  -5   0    6.20   12.40
 -10   5   0   25.90    9.40
  10   5   0   28.90    9.10
 -10   5   0   10.40    7.70
 -10   5   0   -1.20   11.50
  11  -5   0  361.56   37.10
  11  -5   0  254.27   40.00
 -11   5   0  315.17   36.60
  11   5   0  289.97   36.30
 -11   5   0  312.77   35.90
 -11   5   0  377.86   41.80
  12  -5   0   -5.80    9.90
  12  -5   0    2.40   13.20
 -12   5   0   18.60   15.60
 -12   5   0   -1.50   10.30
  12   5   0   14.70   11.10
 -12   5   0    1.80    8.00
  13  -5   0  179.78   31.50
  13  -5   0  221.88   28.60
 -13   5   0  254.47   33.90
 -13   5   0  236.58   28.30
 -13   5   0  255.37   29.30
  13   5   0  231.88   29.70
  14  -5   0   22.10   15.80
  14  -5   0   14.40   11.60
  14   5   0   24.30   13.40
 -14   5   0   18.70   11.20
 -14   5   0   35.10   19.70
 -14   5   0   17.80   10.40
  15  -5   0   25.50   12.40
  15  -5   0    5.60   15.80
 -15   5   0   21.40   20.80
 -15   5   0   13.70   11.90
 -15   5   0   13.30   10.40
  15   5   0   31.90   14.80
  16  -5   0    5.40   17.60
  16  -5   0   39.10   13.70
 -16   5   0   32.40   12.60
 -16   5   0   31.60   11.30
  16   5   0   23.70   16.40
 -16   5   0   25.90   20.10
  17  -5   0   -3.40   15.80
  17  -5   0  -12.40   16.10
 -17   5   0   -5.70   12.50
 -17   5   0   15.60   24.50
 -17   5   0    5.50   13.70
  18  -5   0    7.40   21.40
  18  -5   0   19.00   14.30
 -18   5   0   32.80   13.70
 -18   5   0   20.50   13.50
 -18   5   0   55.29   28.90
  19  -5   0  -30.90   18.60
  19  -5   0   -5.10   14.70
 -19   5   0  -12.50   13.40
 -19   5   0   -8.60   13.20
 -19   5   0   31.10   28.90
  20  -5   0   49.60   16.90
  20  -5   0   -6.20   21.30
 -20   5   0   22.90   14.90
 -20   5   0   49.00   30.50
  21  -5   0   -4.70   23.40
 -21   5   0    5.30   32.80
 -21   5   0    3.40   16.00
  22  -5   0    5.60   16.70
  22  -5   0  -29.40   22.60
 -22   5   0   39.60   36.40
 -22   5   0  -10.60   15.60
   0  -6   0  260.67   37.60
   0  -6   0  299.87   36.80
   0   6   0  346.97   36.50
   0   6   0  303.27   35.20
   0   6   0  272.57   34.70
  -1  -6   0    3.20   14.20
   1  -6   0  -26.90   15.50
  -1  -6   0   -2.30   11.30
   1  -6   0   12.20   12.60
   1   6   0   26.60   10.00
  -1   6   0   13.70   11.20
   1   6   0    3.00    8.70
   1   6   0   29.90   10.50
  -1   6   0   22.50    9.50
  -1   6   0   13.70    9.20
   2  -6   0   -7.50   15.00
   2  -6   0    6.80   12.80
  -2  -6   0   12.60   11.10
  -2  -6   0  -25.60   11.90
  -2   6   0    2.60    8.40
   2   6   0   13.60    8.70
  -2   6   0    3.00    9.10
   2   6   0   11.60    9.30
  -2   6   0    8.30   11.50
   2   6   0   13.10    9.50
  -3  -6   0   70.89   13.40
   3  -6   0   53.19   15.50
  -3  -6   0   46.60   14.30
  -3   6   0   66.89   13.00
   3   6   0   70.09   12.60
   3   6   0   62.19   12.30
  -3   6   0   67.09   11.70
  -3   6   0   59.19   14.70
  -4  -6   0  -15.50   10.00
   4  -6   0    4.10   12.80
  -4  -6   0   22.00   10.40
  -4   6   0   23.90   13.00
  -4   6   0   10.90    8.80
   4   6   0   23.70    9.70
   4   6   0   20.30    9.20
  -4   6   0   28.20   10.10
  -5  -6   0  113.49   18.60
  -5  -6   0  120.79   19.00
   5  -6   0  120.59   22.20
  -5   6   0  167.28   22.70
  -5   6   0  148.89   18.60
   5   6   0  162.08   17.70
  -5   6   0  160.28   19.90
   5   6   0  132.59   19.20
  -6  -6   0   12.30   10.60
   6  -6   0   10.10   13.90
  -6   6   0    9.70   13.60
  -6   6   0   11.50   10.10
   6   6   0   -4.50    8.00
  -6   6   0    7.70    8.40
   6   6   0    8.50    8.40
   7  -6   0  434.96   51.59
  -7   6   0  404.56   48.80
   7   6   0  404.26   47.30
  -7   6   0  440.06   48.00
  -7   6   0  472.15   51.69
   8  -6   0   20.00   15.40
  -8   6   0   21.70    9.70
  -8   6   0   12.50   11.20
   8   6   0   21.70    9.20
  -8   6   0   32.10   15.70
   9  -6   0   75.79   22.30
   9   6   0  135.69   19.80
  -9   6   0  146.39   19.00
  -9   6   0  149.99   24.10
  -9   6   0  173.18   20.80
  10  -6   0    4.10   15.80
 -10   6   0   -5.00    9.40
 -10   6   0   31.30   17.50
 -10   6   0   14.30   11.70
  11  -6   0   30.80   11.80
  11  -6   0   -8.30   16.20
 -11   6   0   34.60   12.80
 -11   6   0   37.90   19.40
 -11   6   0   31.90   10.90
  12  -6   0   55.59   22.20
  12  -6   0  131.79   20.20
 -12   6   0  130.29   17.70
 -12   6   0  136.99   19.30
 -12   6   0   98.39   25.10
  13  -6   0   32.10   14.30
  13  -6   0   47.60   19.70
 -13   6   0   75.79   14.10
 -13   6   0   68.29   23.40
 -13   6   0   63.59   15.10
  14  -6   0  143.39   22.30
  14  -6   0  104.19   26.00
 -14   6   0  156.18   23.10
 -14   6   0  160.68   31.00
 -14   6   0  137.69   20.70
  15  -6   0   48.30   23.00
  15  -6   0   99.19   17.60
 -15   6   0   91.79   28.60
 -15   6   0  107.79   19.50
 -15   6   0   91.39   18.80
  16  -6   0  -27.00   18.90
 -16   6   0   34.20   28.10
 -16   6   0   -2.60   14.20
 -16   6   0   25.80   13.30
  17  -6   0  -24.70   19.00
  17  -6   0   30.80   16.20
 -17   6   0   19.20   15.20
 -17   6   0   28.00   28.90
 -17   6   0  -19.80   13.60
  18  -6   0    1.90   15.30
  18  -6   0  -36.60   17.80
 -18   6   0  -14.80   18.20
 -18   6   0    4.60   29.10
 -18   6   0   11.20   14.10
  19  -6   0    8.30   22.80
 -19   6   0   41.50   18.20
 -19   6   0   15.70   16.20
 -19   6   0    9.10   33.30
  20  -6   0   24.60   19.60
  20  -6   0  -13.60   26.10
 -20   6   0   38.20   36.70
 -20   6   0    8.40   16.10
  21  -6   0  -44.60   20.10
  21  -6   0   28.00   20.20
 -21   6   0    0.80   18.00
 -21   6   0   20.40   38.40
   0  -7   0   36.30   16.10
   0  -7   0  -25.70   18.40
   0   7   0   24.00   11.20
   0   7   0   27.70   12.90
   1  -7   0  296.27   38.20
  -1  -7   0  283.47   35.90
  -1  -7   0  207.08   35.50
   1  -7   0  254.57   38.00
   1   7   0  272.87   34.10
   1   7   0  246.78   32.60
  -1   7   0  253.47   33.40
  -1   7   0  307.57   36.00
   1   7   0  295.17   34.40
  -1   7   0  266.27   33.10
   2  -7   0  100.39   20.60
   2  -7   0   51.19   25.80
  -2  -7   0  116.19   19.00
  -2  -7   0   36.30   19.60
  -2   7   0  147.49   21.00
   2   7   0  102.59   17.70
   2   7   0   62.89   15.90
   2   7   0  107.99   17.00
  -2   7   0   99.29   15.90
  -2   7   0   96.39   17.60
   3  -7   0   56.49   18.50
  -3  -7   0   18.90   16.30
  -3  -7   0   81.99   16.20
   3  -7   0   41.90   24.80
   3   7   0   66.69   14.30
  -3   7   0   57.29   14.10
   3   7   0   56.79   14.40
  -3   7   0   86.59   17.70
   3   7   0   35.40   12.70
  -3   7   0   67.39   14.90
  -4  -7   0  310.87   37.70
   4  -7   0  306.07   42.90
   4  -7   0  252.17   38.50
  -4   7   0  292.07   36.30
   4   7   0  242.98   36.30
  -4   7   0  338.77   39.20
  -4   7   0  288.97   35.00
   5  -7   0  -15.40   16.00
  -5   7   0   14.40   13.80
  -5   7   0   14.30   17.60
   5   7   0   17.90   12.20
  -5   7   0   24.60   11.60
   6  -7   0   16.20   17.80
  -6   7   0   47.40   12.60
  -6   7   0   33.40   19.20
   6   7   0   37.80   13.00
  -6   7   0   29.20   13.90
   7  -7   0   33.40   19.80
  -7   7   0   72.29   21.10
  -7   7   0   75.29   16.10
  -7   7   0   76.79   14.90
   8  -7   0    8.70   18.20
  -8   7   0   40.00   20.60
  -8   7   0   47.30   12.70
  -8   7   0   48.30   15.70
   9  -7   0  -17.30   17.50
  -9   7   0   13.20   14.80
  -9   7   0   30.50   13.90
  -9   7   0   37.20   20.90
  10  -7   0   13.40   20.30
 -10   7   0   28.70   22.30
 -10   7   0   36.20   15.30
 -10   7   0   32.50   15.90
  11  -7   0   54.89   23.50
  11  -7   0  125.09   22.80
 -11   7   0  111.89   19.30
 -11   7   0  126.19   27.70
 -11   7   0   95.59   18.60
  12  -7   0  -18.20   18.20
  12  -7   0   44.80   14.00
 -12   7   0    6.10   15.90
 -12   7   0    6.60   24.40
 -12   7   0   36.40   14.00
  13  -7   0   45.10   25.20
 -13   7   0  132.09   22.50
 -13   7   0  181.58   34.30
 -13   7   0  107.99   22.20
  14  -7   0   -1.90   21.60
  14  -7   0   16.70   16.20
 -14   7   0   51.59   17.50
 -14   7   0   37.50   18.00
 -14   7   0   36.50   28.70
  15  -7   0  -14.40   22.70
  15  -7   0    7.00   15.00
 -15   7   0   78.39   33.60
 -15   7   0    9.40   15.80
 -15   7   0    6.00   17.00
  16  -7   0   74.59   29.40
 -16   7   0  150.48   23.70
 -16   7   0  153.38   38.80
 -16   7   0   89.99   23.40
  17  -7   0  -32.50   24.60
 -17   7   0   61.19   35.70
 -17   7   0   23.20   16.70
 -17   7   0   16.80   18.20
  18  -7   0   83.59   22.60
  18  -7   0   19.30   26.70
 -18   7   0  114.09   21.80
 -18   7   0  112.29   38.10
  19  -7   0    9.20   24.30
  19  -7   0   25.60   19.20
 -19   7   0   45.70   39.10
 -19   7   0   36.20   17.90
   0  -8   0  147.69   38.10
   0  -8   0  206.18   31.60
   0   8   0  200.38   29.40
   0   8   0  206.18   29.50
   0   8   0  254.57   33.70
   1  -8   0   66.09   23.60
  -1  -8   0  112.19   22.60
   1  -8   0   32.10   26.80
  -1   8   0  112.09   28.00
   1   8   0   67.99   18.60
  -1   8   0  106.79   19.30
   1   8   0   74.39   18.70
  -1   8   0   72.99   17.40
   2  -8   0   64.39   23.50
   2  -8   0   31.80   26.50
   2   8   0   84.19   18.50
  -2   8   0   82.39   18.00
  -2   8   0  134.49   23.90
   2   8   0   36.70   16.40
  -2   8   0   97.69   19.40
   3  -8   0   92.69   33.30
   3  -8   0  106.09   27.60
  -3   8   0  176.08   25.90
   3   8   0  105.89   21.30
   3   8   0  137.49   22.20
  -3   8   0  156.18   24.10
  -3   8   0  120.69   24.20
   4  -8   0  -27.70   23.70
   4  -8   0   18.90   20.20
  -4   8   0    9.50   15.80
  -4   8   0   30.70   19.10
   4   8   0    7.30   14.50
  -4   8   0    3.40   16.50
   4   8   0    8.80   13.30
   5  -8   0    1.90   20.60
   5  -8   0   -9.30   29.70
  -5   8   0   44.10   15.00
   5   8   0   68.09   16.40
   5   8   0   39.20   14.40
  -5   8   0   35.50   17.90
  -5   8   0   16.90   20.10
   6  -8   0    1.10   20.00
   6  -8   0  -84.89   30.80
  -6   8   0   11.40   20.70
  -6   8   0   -1.60   14.30
  -6   8   0   16.70   16.90
   6   8   0   10.10   14.60
   7  -8   0  -13.30   19.90
  -7   8   0  -11.60   13.70
  -7   8   0   26.10   17.40
   7   8   0   -1.60   13.90
  -7   8   0   -6.80   21.00
   8  -8   0   26.00   21.90
  -8   8   0   74.09   25.30
   8   8   0   25.00   14.90
  -8   8   0   76.59   19.50
  -8   8   0   42.60   16.60
   9  -8   0  -25.20   20.70
  -9   8   0    5.70   24.50
  -9   8   0    4.30   15.80
  -9   8   0   10.10   18.00
  10  -8   0  -36.70   20.30
 -10   8   0    6.60   16.50
 -10   8   0    1.50   25.10
 -10   8   0   13.70   18.00
  11  -8   0   42.10   24.30
 -11   8   0   46.20   18.50
 -11   8   0   17.10   19.00
  12  -8   0  -14.70   22.00
 -12   8   0   33.40   19.30
 -12   8   0   -8.80   21.20
  13  -8   0  -25.20   23.10
  13  -8   0   16.30   15.90
 -13   8   0   31.50   19.40
 -13   8   0   11.20   21.40
  14  -8   0   15.00   25.70
 -14   8   0   15.00   33.90
 -14   8   0   17.70   21.50
 -14   8   0   15.80   17.20
  15  -8   0   11.90   26.10
 -15   8   0   17.50   20.10
 -15   8   0   25.00   21.10
 -15   8   0   30.00   38.00
  16  -8   0    1.70   21.60
  16  -8   0  -24.50   24.20
 -16   8   0   17.80   21.30
 -16   8   0   59.19   42.20
   0   9   0  -15.40   15.50
   0   9   0   17.50   18.00
  -1   9   0  135.79   25.30
   1   9   0  115.59   24.80
   1   9   0  179.18   27.50
  -1   9   0  198.78   28.10
   2  -9   0   69.49   27.00
  -2   9   0   73.39   23.40
   2   9   0   51.59   22.10
  -2   9   0   40.70   17.90
   2   9   0   71.19   18.60
   3  -9   0   38.10   24.10
  -3   9   0   42.90   20.50
   3   9   0   11.60   16.40
  -3   9   0   14.00   16.80
   3   9   0   34.20   17.70
   4  -9   0   66.09   36.00
   4  -9   0   70.79   26.40
  -4   9   0   84.29   22.70
   4   9   0   79.99   21.00
  -4   9   0   81.19   30.80
  -4   9   0   92.69   20.50
   4   9   0   56.39   19.50
   5  -9   0  -33.40   29.60
   5  -9   0   12.20   24.20
   5   9   0   43.70   17.50
   5   9   0   17.70   17.60
  -5   9   0   13.80   17.20
  -5   9   0   45.50   20.90
  -5   9   0   35.70   31.20
   6  -9   0   -4.10   38.70
   6  -9   0   56.59   29.40
   6   9   0   61.99   19.70
  -6   9   0   86.99   27.00
   6   9   0   71.49   20.10
  -6   9   0   80.09   21.60
  -6   9   0  120.09   23.70
   7  -9   0   24.40   25.90
   7  -9   0    4.00   35.50
  -7   9   0  116.39   30.30
  -7   9   0   63.39   22.10
   7   9   0   68.19   20.10
   7   9   0   59.79   18.60
  -7   9   0   54.09   27.80
   8  -9   0  -60.89   31.80
   8  -9   0    1.00   24.40
  -8   9   0    1.70   19.70
   8   9   0   35.00   17.30
  -8   9   0   72.99   29.30
  -8   9   0   22.10   23.30
   9  -9   0    6.60   24.80
  -9   9   0   97.09   32.70
  -9   9   0   20.00   23.00
  -9   9   0   13.00   17.80
   9   9   0   40.50   17.90
  10  -9   0  -21.20   24.00
  10  -9   0  -88.59   33.20
 -10   9   0   14.30   23.50
 -10   9   0   10.70   17.80
 -10   9   0   27.80   32.90
  11  -9   0   27.20   27.80
 -11   9   0   62.39   36.30
 -11   9   0   29.10   21.30
  12  -9   0   -9.40   25.60
 -12   9   0   19.50   22.70
 -12   9   0   86.09   40.60
  13  -9   0   14.60   25.10
 -13   9   0   70.39   41.60
 -13   9   0   52.99   20.80
 -13   9   0   53.59   23.30
   0  10   0   38.40   24.10
  -1  10   0   41.60   22.70
   1  10   0   42.80   21.30
  -1  10   0   39.90   22.60
   1  10   0    0.40   20.40
   2  10   0    0.30   18.70
   2  10   0   51.79   23.10
  -2  10   0   42.70   21.10
  -2  10   0   60.29   28.30
   3  10   0   61.89   21.30
  -3  10   0   32.10   22.60
  -3  10   0   48.90   23.40
   3  10   0    6.60   20.80
   4  10   0   40.90   22.30
   4  10   0   19.40   21.70
  -4  10   0   -6.10   18.20
  -4  10   0   24.40   21.70
   5  10   0    0.70   19.30
  -5  10   0   56.79   29.20
   5  10   0   39.60   22.00
   6 -10   0   16.50   26.90
   6  10   0   30.00   21.10
   6  10   0   45.00   20.00
  -6  10   0   67.29   24.60
   7 -10   0   45.40   28.50
   7  10   0   14.70   19.70
  -7  10   0    6.20   29.10
   8  10   0   49.70   21.60
  26   0  -1   26.80   22.80
 -26   0   1   -9.90   16.20
  25   0  -1  -12.00   20.30
 -25   0   1   16.60   15.80
  24   0  -1  -16.90   16.50
 -24   0   1   16.70   15.00
 -23   0   1  -15.50   13.50
  23   0  -1  -25.40   16.30
  22   0  -1  -14.50   16.00
 -22   0   1  -13.10   12.90
  22   0  -1   17.10   16.20
 -21   0   1   63.09   15.10
  21   0  -1   68.79   18.20
  21   0  -1   52.69   16.90
  20   0  -1   25.00   14.80
  20   0  -1   -1.10   13.90
 -20   0   1    6.10   11.90
  19   0  -1  457.25   51.59
  19   0  -1  398.06   49.99
 -19   0   1  438.86   49.30
  18   0  -1    0.00   12.40
  18   0  -1    3.90   12.00
 -18   0   1  -10.20    9.80
  17   0  -1  412.86   45.90
 -17   0   1  356.16   43.80
  17   0  -1  389.36   44.50
  16   0  -1   -4.90   10.20
 -16   0   1   -7.00    8.20
  16   0  -1   16.10   10.60
  15   0  -1   89.99   14.00
 -15   0   1   87.19   11.10
  15   0  -1   83.49   14.10
 -15   0   1   77.69   13.10
  14   0  -1   22.40    8.30
 -14   0   1   -1.80    5.00
 -14   0   1    4.70    7.00
  14   0  -1   -7.00    8.60
 -13   0   1  495.05   50.99
  13   0  -1  472.75   52.29
  13   0  -1  476.15   52.49
 -13   0   1  440.06   51.79
  12   0  -1    1.40    6.60
 -12   0   1   -2.30    4.50
 -12   0   1  -10.70    5.80
  12   0  -1   -9.40    7.30
 -11   0   1  904.41   93.59
  11   0  -1  870.11   94.39
  11   0  -1  864.71   94.19
 -11   0   1  864.11   93.99
 -10   0   1    2.20    4.20
 -10   0   1   -1.60    5.40
  10   0  -1    7.20    6.70
  10   0  -1    7.20    6.20
   9   0  -1  471.35   51.99
  -9   0   1  497.65   51.69
  -9   0   1  505.95   51.39
   9   0  -1  476.15   52.09
  -9   0   1  429.16   52.99
  -8   0   1    4.60    4.20
   8   0  -1   -4.00    5.50
   8   0  -1    6.30    4.90
  -8   0   1    1.90    3.80
  -8   0   1   -6.30    7.10
  -7   0   1   86.89   10.80
   7   0  -1   77.89   11.60
  -7   0   1   75.59   12.30
  -7   0   1   97.09   10.70
   7   0  -1   99.09   11.20
   6   0  -1   -4.60    4.30
  -6   0   1   -1.40    5.80
   6   0  -1    0.40    4.00
  -6   0   1    0.60    3.40
  -6   0   1    3.50    3.50
   5   0  -1  354.76   39.60
   5   0  -1  370.76   39.50
  -5   0   1  371.86   39.40
  -5   0   1  355.76   40.20
  -5   0   1  378.56   39.40
  -4   0   1   -1.10    2.80
   4   0  -1    2.20    3.00
  -4   0   1    2.10    2.50
   4   0  -1    1.00    3.20
   4   0  -1    2.40    3.80
   3   0  -1  157.28   16.70
  -3   0   1  159.48   16.70
   3   0  -1  156.58   16.70
   3   0  -1  150.08   16.60
  -3   0   1  146.79   16.60
  -3   0   1  145.99   16.80
   2   0  -1    2.90    1.80
  -2   0   1   -1.10    1.40
   2   0  -1    0.50    2.20
  -2   0   1    0.00    1.10
   1   0  -1  763.62   76.19
  -1   0   1  678.93   76.29
  -1   0   1  710.83   76.19
  -1   0  -1 1869.61  189.38
   1   0   1 1708.03  189.28
   1   0   1 1773.22  189.28
  -2   0  -1    0.60    1.30
   2   0   1   -1.10    1.50
  -2   0  -1    2.60    2.30
   2   0   1    0.00    3.10
  -2   0  -1    1.10    2.00
  -2   0  -1   -0.60    2.10
   2   0   1   -0.20    2.20
   2   0   1    1.00    1.70
   3   0   1   43.00    7.10
  -3   0  -1   47.70    6.40
   3   0   1   71.09    6.80
  -3   0  -1   56.19    7.10
   3   0   1   55.29    6.30
   4   0   1    1.50    3.30
  -4   0  -1    2.00    2.40
  -4   0  -1   -1.20    4.10
   4   0   1    0.10    3.20
   4   0   1    1.90    2.30
   5   0   1   59.79    8.00
   5   0   1   74.49    7.90
  -5   0  -1   52.39    8.50
   5   0   1   55.09    7.30
  -5   0  -1   53.99    7.20
  -6   0  -1   -2.10    5.20
   6   0   1    1.40    4.40
   6   0   1    2.10    4.20
  -6   0  -1    0.00    3.10
   7   0   1   78.59   11.40
  -7   0  -1   75.29   11.90
   7   0   1  111.59   11.30
  -7   0  -1   82.99   10.40
  -8   0  -1    7.30    6.40
   8   0   1   -3.20    4.90
  -8   0  -1    3.00    4.00
   8   0   1   -4.80    5.30
  -9   0  -1   23.10    8.00
  -9   0  -1   10.40    5.20
   9   0   1   21.20    6.70
   9   0   1   24.30    6.60
 -10   0  -1   -2.90    7.60
  10   0   1    0.70    6.50
 -10   0  -1    6.30    5.00
  10   0   1   -3.80    6.00
  11   0   1  285.07   32.50
 -11   0  -1  294.37   32.10
  11   0   1  291.17   32.80
 -11   0  -1  278.87   34.30
 -12   0  -1   -6.90    8.90
  12   0   1  -11.60    6.40
  12   0   1   -1.80    7.30
 -12   0  -1   -8.50    5.60
 -13   0  -1   94.69   12.90
 -13   0  -1   88.39   16.00
  13   0   1   94.89   14.10
  13   0   1  103.39   14.20
 -14   0  -1   -4.70    6.80
  14   0   1   -6.90    8.30
  14   0   1    3.30    8.00
 -14   0  -1    1.20   11.00
  15   0   1  314.57   38.80
 -15   0  -1  337.47   41.50
 -15   0  -1  316.07   38.20
  15   0   1  380.26   39.60
 -16   0  -1   -0.70    8.20
  16   0   1    4.40   10.40
  16   0   1    8.40   10.40
 -17   0  -1  202.08   26.10
  17   0   1  216.98   28.80
  17   0   1  199.68   26.70
 -18   0  -1   18.40   10.50
  18   0   1   34.60   12.70
  18   0   1   17.70   12.70
 -19   0  -1   14.70   10.80
  19   0   1   19.00   12.70
  19   0   1   28.80   16.10
  20   0   1   -3.00   16.70
 -20   0  -1   -3.70   10.90
  20   0   1   -9.00   12.90
 -21   0  -1   18.90   12.70
  21   0   1    7.60   14.80
  21   0   1   28.20   15.60
  22   0   1    2.60   15.50
  22   0   1    5.10   15.70
 -22   0  -1    4.80   12.80
  23   0   1   55.69   19.10
 -23   0  -1   65.49   16.30
 -24   0  -1   -3.80   14.30
  24   0   1    4.70   18.00
 -25   0  -1   -3.80   14.90
  25   0   1    0.90   19.00
  25  -1  -1   -0.70   16.80
 -25  -1   1   -9.50   14.90
 -25   1   1   -3.10   15.50
  25   1  -1   -5.60   20.80
  24  -1  -1  -32.00   18.80
 -24  -1   1   -6.10   14.30
  24  -1  -1  -11.40   16.50
 -24   1   1   -9.30   14.40
  24   1  -1   11.30   19.00
  23  -1  -1   17.00   15.70
  23  -1  -1  -23.10   18.20
 -23  -1   1  -15.00   13.60
  23   1  -1   11.70   19.50
 -23   1   1  -13.80   13.70
 -22  -1   1   -5.30   13.20
  22  -1  -1   16.50   15.30
  22  -1  -1   22.30   18.80
 -22   1   1   -5.10   12.70
  22   1  -1  -27.20   15.90
 -21  -1   1   69.79   16.50
  21  -1  -1   69.19   21.30
  21  -1  -1  119.29   19.20
 -21   1   1   64.09   16.20
  21   1  -1  101.19   20.10
  20  -1  -1  120.69   18.00
 -20  -1   1   88.89   16.70
 -20   1   1   81.09   16.10
  20   1  -1   84.59   19.20
  19  -1  -1  302.67   36.20
  19  -1  -1  236.18   31.80
 -19  -1   1  238.28   31.40
  19   1  -1  252.57   32.90
 -19   1   1  227.08   31.00
  19   1  -1  254.77   32.10
  18  -1  -1   46.10   14.90
  18  -1  -1   17.20   11.90
 -18  -1   1   40.60   12.00
  18   1  -1   27.40   13.50
  18   1  -1   29.20   13.50
 -18   1   1   37.60   11.10
 -17  -1   1   11.00   10.00
  17  -1  -1   11.40   10.60
  17  -1  -1    5.10   12.20
  17   1  -1   -3.40   11.50
 -17   1   1    5.10    9.00
  17   1  -1  -10.70    9.90
 -17   1   1   -7.80    6.90
  16  -1  -1  225.28   27.00
  16  -1  -1  162.38   24.00
 -16  -1   1  177.18   23.80
 -16   1   1  192.98   22.60
  16   1  -1  185.98   26.00
 -16   1   1  194.28   24.20
 -16   1   1  227.68   29.30
  16   1  -1  199.08   25.20
  15  -1  -1  278.17   33.50
  15  -1  -1  265.57   32.00
 -15  -1   1  262.37   31.80
  15   1  -1  280.97   32.70
 -15   1   1  278.87   30.50
  15   1  -1  294.97   32.50
 -15   1   1  250.37   35.90
 -15   1   1  257.37   31.50
  14  -1  -1  201.28   24.40
  14  -1  -1  152.48   22.20
 -14  -1   1  164.58   22.00
  14   1  -1  172.18   22.90
 -14   1   1  200.68   21.40
 -14   1   1  176.68   22.20
  14   1  -1  192.98   24.00
 -14   1   1  201.48   27.10
  13  -1  -1  226.38   27.90
  13  -1  -1  250.07   29.30
 -13  -1   1  238.28   28.00
  13   1  -1  241.08   28.60
 -13   1   1  257.07   26.90
  13   1  -1  227.88   27.70
 -13   1   1  236.68   30.90
 -13   1   1  228.58   27.30
 -12  -1   1  124.39   15.60
  12  -1  -1  121.69   16.70
  12  -1  -1  114.09   15.70
  12   1  -1  134.19   16.20
 -12   1   1  123.79   15.50
  12   1  -1  100.59   15.80
 -12   1   1  127.29   15.30
 -12   1   1  144.39   19.10
  11  -1  -1  164.78   19.90
 -11  -1   1  153.28   18.60
  11  -1  -1  139.39   18.40
 -11   1   1  149.59   17.50
  11   1  -1  147.59   18.50
  11   1  -1  127.19   17.90
 -11   1   1  165.58   21.60
 -11   1   1  135.99   17.70
  10  -1  -1  122.99   16.00
 -10  -1   1  128.99   14.60
 -10  -1   1  134.29   16.40
  10  -1  -1  152.68   18.00
 -10   1   1  129.79   15.50
 -10   1   1  126.09   15.60
 -10   1   1  124.49   18.10
  10   1  -1  140.99   16.90
  10   1  -1  105.49   15.90
   9  -1  -1  361.16   35.60
   9  -1  -1  312.17   34.60
  -9  -1   1  311.87   33.70
  -9  -1   1  304.57   34.60
  -9   1   1  326.47   34.30
   9   1  -1  269.77   34.30
   9   1  -1  315.37   34.50
  -9   1   1  319.57   34.10
  -9   1   1  301.27   36.20
  -8  -1   1  424.86   44.90
   8  -1  -1  449.26   46.20
  -8  -1   1  436.96   45.60
   8  -1  -1  426.56   45.50
   8   1  -1  369.06   45.30
  -8   1   1  424.36   45.30
  -8   1   1  430.56   45.20
   8   1  -1  414.26   45.50
  -8   1   1  404.76   46.50
   7  -1  -1  464.95   48.90
  -7  -1   1  476.05   49.00
   7  -1  -1  441.56   49.50
  -7  -1   1  460.05   48.50
   7   1  -1  395.76   48.70
   7   1  -1  465.65   48.90
  -7   1   1  464.75   48.70
  -7   1   1  461.05   50.09
  -7   1   1  462.45   48.70
   6  -1  -1  974.50  104.59
  -6  -1   1 1015.30  104.19
   6  -1  -1  994.20  104.19
  -6  -1   1 1001.70  103.89
   6   1  -1  907.71  103.99
   6   1  -1  957.10  104.19
  -6   1   1 1001.60  104.99
  -6   1   1  952.30  104.09
  -6   1   1  998.30  104.09
  -5  -1   1  161.48   17.40
   5  -1  -1  156.38   17.70
   5  -1  -1  185.58   18.70
  -5  -1   1  137.39   17.20
  -5  -1   1  156.68   17.90
   5   1  -1  149.99   17.30
  -5   1   1  164.78   17.50
   5   1  -1  170.88   17.70
  -5   1   1  162.38   17.50
  -5   1   1  142.69   18.70
   4  -1  -1  657.03   70.99
  -4  -1   1  678.13   70.49
  -4  -1   1  687.33   70.69
   4  -1  -1  658.63   70.59
  -4   1   1  657.73   70.59
   4   1  -1  670.43   70.69
   4   1  -1  614.54   70.39
  -4   1   1  667.23   71.29
  -4   1   1  672.63   70.59
   3  -1  -1   21.20    4.00
   3  -1  -1   29.90    4.80
  -3  -1   1   21.20    3.50
  -3  -1   1   24.50    4.00
   3   1  -1   16.10    3.20
  -3   1   1   26.50    3.60
   3   1  -1   21.20    3.50
  -3   1   1   25.50    3.90
   3   1  -1   22.40    4.30
  -3   1   1   19.10    5.40
  -2  -1   1   42.60    6.00
  -2  -1   1   62.89    6.40
  -2  -1   1   41.60    5.80
   2  -1  -1   53.49    6.50
   2   1  -1   47.00    6.10
   2   1  -1   42.40    6.10
  -2   1   1   44.80    5.70
   2   1  -1   67.99    6.20
  -2   1   1   46.90    5.90
  -2   1   1   45.50    6.70
   1  -1  -1 2690.93  323.67
   1  -1  -1 3269.77  323.77
   1  -1  -1 2934.21  323.67
  -1  -1   1 3312.67  323.67
  -1  -1   1 3068.49  323.57
  -1  -1   1 3093.59  323.67
  -1  -1   1 2929.01  323.67
   1  -1  -1 2941.01  323.57
  -1   1   1 3108.89  323.67
   1   1  -1 3057.49  323.57
   1   1  -1 3219.68  323.77
  -1   1   1 2849.91  323.57
  -1   1   1 2982.60  323.77
   1   1  -1 3159.78  323.57
   1   1  -1 3126.79  323.77
   0  -1  -1  360.36   44.80
   0  -1  -1  437.96   45.10
   0  -1   1  408.76   45.00
   0  -1   1  424.46   44.90
   0  -1   1  445.36   44.90
   0  -1  -1  413.86   44.80
   0  -1   1  425.46   44.90
   0  -1  -1  458.85   45.00
   0   1   1  420.46   45.00
   0   1  -1  425.16   44.90
   0   1  -1  428.66   44.80
   0   1   1  427.16   44.80
   0   1  -1  430.06   45.00
   0   1   1  428.06   45.10
   0   1   1  377.46   44.80
  -1  -1  -1 1338.17  130.19
  -1  -1  -1 1201.18  130.29
   1  -1   1 1294.67  130.29
  -1  -1  -1 1269.67  129.99
   1  -1   1 1195.68  130.19
  -1   1  -1 1021.80  130.29
   1   1   1 1308.37  129.99
  -1   1  -1 1200.98  130.19
  -1   1  -1 1224.38  130.19
   1   1   1 1261.17  130.19
   1   1   1 1224.38  130.29
  -1   1  -1 1150.58  130.09
   2  -1   1   92.09   11.70
  -2  -1  -1   88.69   11.50
  -2  -1  -1   99.99   10.80
   2   1   1   89.19   11.40
   2   1   1  106.49   10.80
   2   1   1  111.89   11.10
  -2   1  -1  101.19   11.70
  -2   1  -1   97.79   11.50
  -2   1  -1  100.49   11.10
  -2   1  -1   91.29   11.20
  -3  -1  -1   75.39    8.90
  -3  -1  -1   59.29    9.40
   3  -1   1   76.89   10.10
   3   1   1   74.99    8.70
  -3   1  -1   73.69    8.80
  -3   1  -1   68.79    9.60
  -3   1  -1   62.89    8.80
   3   1   1   86.09    8.50
   4  -1   1 1881.71  188.28
  -4  -1  -1 1528.75  188.08
  -4  -1  -1 1795.02  187.88
  -4   1  -1 1786.92  187.78
   4   1   1 1714.43  187.88
   4   1   1 1790.82  187.98
  -4   1  -1 1785.02  187.88
  -4   1  -1 1840.22  188.38
   4   1   1 1796.82  187.78
  -5  -1  -1  882.21   99.09
   5  -1   1  945.71   99.19
  -5  -1  -1  978.50   98.79
  -5   1  -1  915.31   98.69
   5   1   1  973.50   98.69
  -5   1  -1  897.71   98.59
  -5   1  -1  886.61   99.19
   5   1   1  935.91   98.89
   6  -1   1  901.61   94.79
  -6  -1  -1  811.72   94.59
  -6  -1  -1  929.91   94.29
   6   1   1  877.11   94.29
   6   1   1  901.11   93.89
  -6   1  -1  879.41   94.09
  -6   1  -1  883.31   94.19
  -6   1  -1  865.51   94.89
   6   1   1  902.51   94.29
   7  -1   1  961.30  103.09
  -7  -1  -1 1035.10  102.69
   7  -1   1  932.11  102.69
  -7   1  -1  943.71  102.59
   7   1   1  911.01  102.69
  -7   1  -1  926.01  102.39
  -7   1  -1  961.70  103.39
   7   1   1 1030.30  102.69
   8  -1   1  512.65   56.89
  -8  -1  -1  544.15   56.79
   8  -1   1  547.05   57.59
   8   1   1  502.55   56.89
  -8   1  -1  537.95   56.39
  -8   1  -1  524.55   57.89
   8   1   1  512.65   56.89
  -8   1  -1  533.75   56.59
  -9  -1  -1    7.50    5.70
   9  -1   1   -1.20    5.90
   9  -1   1    6.60    6.60
  -9   1  -1    8.80    7.90
   9   1   1   -1.10    6.00
   9   1   1  -10.20    5.00
  -9   1  -1    8.20    4.10
  -9   1  -1   15.10    4.50
  10  -1   1  160.38   19.10
 -10  -1  -1  148.29   17.60
  10  -1   1  142.49   17.80
  10   1   1  114.19   17.70
  10   1   1  143.89   17.50
 -10   1  -1  137.79   16.50
 -10   1  -1  151.28   19.40
 -10   1  -1  147.99   17.00
  11  -1   1  161.68   19.80
  11  -1   1  200.88   21.60
 -11  -1  -1  160.98   19.80
  11   1   1  174.38   20.00
 -11   1  -1  154.08   19.10
 -11   1  -1  149.88   18.70
  11   1   1  148.69   19.90
 -11   1  -1  172.88   22.40
  12  -1   1   45.80   10.00
 -12  -1  -1   35.00    8.30
  12  -1   1   55.39    9.50
 -12   1  -1   28.40   11.20
  12   1   1   42.30    8.40
 -12   1  -1   37.40    6.50
 -12   1  -1   30.20    7.40
  12   1   1   41.20    9.30
  13  -1   1  159.48   21.10
 -13  -1  -1  176.98   21.40
  13  -1   1  195.88   23.30
  13   1   1  199.38   21.90
 -13   1  -1  187.48   20.70
  13   1   1  167.08   21.50
 -13   1  -1  144.89   23.00
 -13   1  -1  163.38   19.70
 -14  -1  -1  366.16   43.60
  14  -1   1  415.16   45.20
  14  -1   1  368.66   43.70
  14   1   1  423.36   44.20
 -14   1  -1  386.96   42.40
 -14   1  -1  400.26   46.50
  14   1   1  382.26   44.20
 -14   1  -1  385.16   43.40
 -15  -1  -1  175.38   22.70
  15  -1   1  182.18   23.30
  15  -1   1  220.18   26.40
 -15   1  -1  185.08   21.20
  15   1   1  189.48   24.10
  15   1   1  183.88   23.70
 -15   1  -1  191.38   26.70
 -15   1  -1  162.28   22.80
 -16  -1  -1  684.93   79.29
  16  -1   1  695.13   79.49
  16  -1   1  798.42   81.09
  16   1   1  784.02   80.59
 -16   1  -1  686.83   78.99
  16   1   1  703.33   79.69
 -16   1  -1  759.72   82.79
  17  -1   1   14.30   10.50
 -17  -1  -1   10.00    9.90
  17  -1   1   11.40   12.20
 -17   1  -1   -0.30   15.40
 -17   1  -1    1.40    8.90
  17   1   1   21.70   12.80
  17   1   1    3.30   10.50
  18  -1   1   23.40   14.20
  18  -1   1    5.70   10.90
 -18  -1  -1    9.90   10.60
  18   1   1   16.10   13.60
 -18   1  -1  -13.80    9.40
 -18   1  -1   47.20   18.10
  18   1   1  -12.60   13.20
  19  -1   1  178.28   27.10
 -19  -1  -1  157.78   22.60
  19  -1   1  136.99   23.70
  19   1   1  228.98   25.70
  19   1   1  186.68   26.60
 -19   1  -1  160.18   22.40
  20  -1   1   23.90   16.60
 -20  -1  -1   32.00   12.60
  20  -1   1   12.00   13.60
 -20   1  -1   19.90   11.90
  20   1   1   42.90   15.90
  20   1   1   21.40   14.20
  21  -1   1  107.39   23.30
  21  -1   1  152.98   26.60
 -21  -1  -1  136.79   21.40
  21   1   1  191.18   25.50
 -21   1  -1  145.89   21.10
  22  -1   1   12.00   14.10
 -22  -1  -1   18.50   13.30
  22   1   1   17.10   18.50
 -22   1  -1   44.80   13.70
  23  -1   1    9.50   20.80
  23  -1   1   15.80   15.80
 -23  -1  -1    1.20   13.60
 -23   1  -1  -13.00   13.00
  23   1   1   -9.70   17.30
  24  -1   1    9.20   22.70
 -24  -1  -1   25.30   15.20
  24  -1   1   41.60   18.10
  24   1   1   30.00   19.40
 -24   1  -1   16.50   14.80
  25  -1   1   -5.90   16.60
 -25  -1  -1    5.40   14.80
 -25   1  -1  -23.60   14.50
  25   1   1  -18.20   19.90
  25  -2  -1   20.40   17.30
  25  -2  -1    5.30   22.90
 -25  -2   1   13.50   16.00
  25   2  -1   29.50   23.90
 -25   2   1    4.30   16.30
  24  -2  -1   55.49   19.20
  24  -2  -1   59.39   24.90
 -24  -2   1   82.89   18.10
  24   2  -1  111.79   24.30
 -24   2   1   96.69   19.00
  23  -2  -1   37.90   15.70
  23  -2  -1   11.70   20.80
 -23  -2   1   48.70   15.60
  23   2  -1   27.80   21.30
 -23   2   1   52.29   15.70
  22  -2  -1   70.79   26.40
  22  -2  -1  107.79   19.90
 -22  -2   1   99.09   19.50
 -22   2   1  145.79   20.00
  22   2  -1  155.68   24.30
  21  -2  -1  -13.00   18.80
 -21  -2   1   12.90   13.40
  21  -2  -1   10.60   13.00
  21   2  -1    6.20   17.70
 -21   2   1   32.50   13.40
  20  -2  -1    0.20   12.00
  20  -2  -1   20.00   16.80
 -20  -2   1    7.00   12.80
 -20   2   1   19.70   12.00
  20   2  -1   -0.80   15.60
  19  -2  -1    8.60   11.60
  19  -2  -1   -2.40   16.50
 -19  -2   1   10.10   11.90
  19   2  -1    8.70   15.30
 -19   2   1   26.50   21.10
 -19   2   1   -0.20   10.00
  18  -2  -1    4.70   14.60
  18  -2  -1    6.40   10.70
 -18  -2   1   -0.30   11.20
 -18   2   1   -4.50    9.50
  18   2  -1   10.90   14.60
 -18   2   1   19.60    8.70
 -18   2   1   25.00   19.20
  17  -2  -1   87.89   18.40
 -17  -2   1   68.29   15.10
  17  -2  -1   86.29   15.50
 -17   2   1   82.99   20.60
  17   2  -1   91.09   17.10
 -17   2   1  104.89   13.30
 -17   2   1   95.39   14.40
  16  -2  -1  130.29   19.10
  16  -2  -1  139.99   21.40
 -16  -2   1  121.09   18.70
 -16   2   1  141.09   17.40
  16   2  -1  179.68   20.70
  16   2  -1  126.39   18.80
 -16   2   1  130.59   17.70
 -16   2   1  130.39   23.20
 -15  -2   1    6.70    9.30
  15  -2  -1   13.00    9.50
  15  -2  -1   13.70   11.60
 -15   2   1   15.70    7.60
 -15   2   1    8.80   14.00
  15   2  -1    0.70    7.90
  15   2  -1    0.40   10.90
 -15   2   1   27.60    7.80
  14  -2  -1  697.13   73.69
  14  -2  -1  632.24   72.09
 -14  -2   1  677.63   72.29
 -14   2   1  667.43   74.89
  14   2  -1  657.63   71.99
 -14   2   1  617.84   71.69
  14   2  -1  660.93   72.29
 -14   2   1  692.33   71.49
  13  -2  -1  102.59   14.90
 -13  -2   1  111.19   15.20
  13  -2  -1   95.59   16.40
 -13   2   1  111.99   18.70
  13   2  -1  112.59   15.80
  13   2  -1  103.79   15.10
 -13   2   1  106.69   14.20
 -13   2   1  117.89   14.70
 -12  -2   1  270.97   31.40
  12  -2  -1  297.17   31.30
  12  -2  -1  278.47   33.10
 -12   2   1  265.77   33.80
 -12   2   1  284.87   30.70
  12   2  -1  247.58   30.60
 -12   2   1  278.57   30.60
  12   2  -1  273.07   31.70
  11  -2  -1  168.28   20.90
 -11  -2   1  156.28   18.90
  11  -2  -1  139.59   18.30
 -11   2   1  122.89   20.10
  11   2  -1  121.39   17.30
 -11   2   1  151.58   17.60
  11   2  -1  166.38   18.50
 -11   2   1  161.18   17.70
  10  -2  -1   89.29   11.00
 -10  -2   1   64.69   10.80
  10  -2  -1   67.79   12.00
  10   2  -1   48.30    9.30
 -10   2   1   82.59    9.80
 -10   2   1   84.89   14.10
  10   2  -1   77.59   11.40
 -10   2   1   77.49    9.70
   9  -2  -1  207.18   24.50
  -9  -2   1  198.88   24.80
   9  -2  -1  226.58   26.30
  -9   2   1  233.68   24.00
  -9   2   1  210.28   24.00
   9   2  -1  199.48   23.60
   9   2  -1  217.78   24.80
  -9   2   1  209.88   26.10
  -8  -2   1   32.90    5.70
   8  -2  -1   29.40    7.60
  -8  -2   1   35.00    7.80
   8  -2  -1   47.70    9.40
   8   2  -1   48.10    8.30
  -8   2   1   43.30    6.80
  -8   2   1   49.20    7.20
  -8   2   1   39.80   10.30
   8   2  -1   39.20    6.10
   7  -2  -1  239.58   26.60
   7  -2  -1  225.08   25.00
  -7  -2   1  228.58   25.00
  -7  -2   1  227.58   24.30
  -7   2   1  204.58   24.80
  -7   2   1  216.38   26.20
   7   2  -1  228.58   25.10
   7   2  -1  210.88   24.20
  -7   2   1  222.88   24.60
   6  -2  -1  313.67   34.90
   6  -2  -1  308.27   34.00
  -6  -2   1  316.97   33.60
  -6   2   1  313.57   34.00
   6   2  -1  324.27   34.10
   6   2  -1  295.37   33.40
  -6   2   1  307.07   33.80
   6   2  -1  304.47   33.90
  -6   2   1  328.57   35.40
  -5  -2   1   63.79    7.60
  -5  -2   1   46.20    7.50
   5  -2  -1   62.49    9.30
   5   2  -1   53.59    7.70
  -5   2   1   66.69    7.80
  -5   2   1   54.29    7.90
   5   2  -1   81.19    8.50
  -5   2   1   54.29   10.10
   5   2  -1   67.89    9.00
   4  -2  -1  268.07   28.20
  -4  -2   1  258.37   27.00
   4   2  -1  242.68   26.70
   4   2  -1  263.57   27.20
  -4   2   1  243.08   27.00
   4   2  -1  250.37   27.30
  -4   2   1  227.88   28.20
   4   2  -1  240.08   26.60
  -4   2   1  237.58   27.30
  -3  -2   1   -6.30    3.10
  -3  -2   1    3.20    3.00
   3  -2  -1   11.00    5.40
  -3  -2   1    7.10    3.70
   3   2  -1   10.00    4.50
  -3   2   1    8.20    5.10
  -3   2   1    6.30    4.10
  -3   2   1   14.30    3.70
   3   2  -1   18.80    4.10
  -2  -2   1 1077.59  112.69
  -2  -2   1 1103.49  112.79
   2  -2  -1 1122.69  113.09
  -2  -2   1 1098.19  112.69
  -2   2   1 1039.40  112.69
   2   2  -1 1078.79  112.69
   2   2  -1  974.80  112.79
   2   2  -1  956.50  112.59
  -2   2   1 1074.19  112.79
  -2   2   1 1067.49  113.09
  -1  -2   1  448.16   47.00
   1  -2  -1  455.45   47.40
  -1  -2   1  438.36   47.00
   1   2  -1  403.86   47.20
  -1   2   1  413.56   47.20
   1   2  -1  456.15   46.90
  -1   2   1  442.36   47.10
  -1   2   1  440.46   46.90
   0  -2  -1  516.65   51.89
   0  -2  -1  496.35   51.69
   0  -2   1  510.25   51.49
   0  -2  -1  470.85   51.09
   0   2   1  411.36   51.29
   0   2  -1  522.25   51.59
   0   2  -1  443.36   51.69
   0   2   1  468.25   51.39
  -1  -2  -1  252.07   27.10
  -1  -2  -1  249.28   26.30
  -1  -2  -1  239.88   27.10
   1  -2   1  274.77   27.20
  -1  -2  -1  228.68   26.90
   1   2   1  206.58   26.50
  -1   2  -1  245.48   26.90
   1   2   1  254.47   26.30
  -1   2  -1  262.97   26.80
  -1   2  -1  240.88   27.30
  -2  -2  -1   32.40    5.70
  -2  -2  -1   49.30    6.60
   2  -2   1   42.00    6.90
  -2  -2  -1   53.09    5.60
  -2  -2  -1   39.00    6.60
  -2   2  -1   38.30    6.20
  -2   2  -1   25.30    7.20
   2   2   1   33.20    5.60
  -2   2  -1   42.90    6.50
   2   2   1   59.89    5.90
  -3  -2  -1  408.56   44.10
   3  -2   1  398.86   44.60
  -3   2  -1  411.76   44.70
  -3   2  -1  413.86   44.00
  -3   2  -1  402.26   44.10
   3   2   1  387.06   43.70
   3   2   1  437.06   43.70
  -4  -2  -1  610.94   68.89
   4  -2   1  667.53   69.29
   4   2   1  617.14   68.49
  -4   2  -1  615.04   68.79
  -4   2  -1  655.83   68.79
   4   2   1  691.53   68.59
  -4   2  -1  646.94   69.49
  -5  -2  -1   22.70    6.00
   5  -2   1   33.80    7.00
  -5   2  -1   21.70    6.80
  -5   2  -1   24.30    5.40
   5   2   1   38.80    5.40
  -5   2  -1   35.60    5.30
   6  -2   1  233.98   27.30
  -6  -2  -1  222.78   26.10
  -6  -2  -1  225.88   26.50
  -6   2  -1  221.28   26.00
   6   2   1  248.48   26.00
  -6   2  -1  251.57   27.60
  -6   2  -1  246.98   26.00
  -7  -2  -1  588.84   62.19
   7  -2   1  589.74   63.09
  -7  -2  -1  492.15   62.29
  -7   2  -1  603.64   63.19
   7   2   1  611.94   62.09
  -7   2  -1  581.04   62.09
   7   2   1  605.74   62.19
  -7   2  -1  565.24   62.09
  -8  -2  -1   95.59   12.60
   8  -2   1  103.19   14.20
  -8  -2  -1   92.99   13.60
  -8   2  -1   88.69   14.40
   8   2   1   99.59   12.50
   8   2   1   96.39   12.90
  -8   2  -1   93.59   12.60
  -8   2  -1  109.19   12.70
  -9  -2  -1   15.00    6.80
   9  -2   1    9.50    6.90
   9  -2   1   15.10    7.90
   9   2   1   18.70    6.40
   9   2   1   14.50    5.50
  -9   2  -1   22.50    5.40
  -9   2  -1   13.30    5.10
  -9   2  -1   15.00    8.70
 -10  -2  -1   21.70    7.20
  10  -2   1   15.20    8.40
  10  -2   1   35.00    7.60
 -10   2  -1   24.50    5.40
  10   2   1   19.20    6.20
  10   2   1   23.70    7.40
 -10   2  -1   23.00    5.60
 -10   2  -1    2.40    8.90
  11  -2   1   -1.20    8.00
  11  -2   1    1.20    6.70
 -11  -2  -1    7.60    6.80
  11   2   1   -0.80    5.60
 -11   2  -1    6.80    8.60
 -11   2  -1   -5.00    4.80
 -11   2  -1   -0.30    5.00
  11   2   1   -2.80    6.70
  12  -2   1   32.40    8.80
 -12  -2  -1   31.70    8.40
  12  -2   1   17.20    9.40
 -12   2  -1   25.80    7.00
  12   2   1   31.30    8.70
  12   2   1   22.10    7.40
 -12   2  -1   35.20    6.70
 -12   2  -1   40.90   11.70
  13  -2   1  189.38   23.70
  13  -2   1  200.58   25.80
 -13  -2  -1  196.38   24.00
  13   2   1  187.38   23.40
 -13   2  -1  206.28   22.50
 -13   2  -1  191.48   22.90
 -13   2  -1  174.38   25.90
  13   2   1  197.38   23.80
 -14  -2  -1   34.10    9.60
  14  -2   1   19.50   11.30
  14  -2   1   35.40    9.40
  14   2   1   32.40   10.30
 -14   2  -1   17.40    7.40
 -14   2  -1   21.10   13.40
  14   2   1   28.00    9.30
 -14   2  -1   29.30    7.20
 -15  -2  -1   24.70    9.80
  15  -2   1   18.10    9.90
  15  -2   1   22.40   12.00
 -15   2  -1   25.80    7.40
 -15   2  -1   13.60   13.40
 -15   2  -1   22.00    7.80
  15   2   1    9.30    9.00
  15   2   1   26.50   11.50
 -16  -2  -1   -8.80    9.40
  16  -2   1   -1.20    9.60
  16  -2   1   -8.00   11.70
 -16   2  -1    0.10    8.10
 -16   2  -1    1.30   15.40
  16   2   1  -11.10    9.20
 -16   2  -1   -3.50    6.70
  16   2   1   -9.40   11.90
  17  -2   1   54.89   15.50
 -17  -2  -1   45.30   12.00
  17  -2   1   31.70   11.80
 -17   2  -1   39.40   10.20
  17   2   1   47.50   14.00
 -17   2  -1   19.50   17.80
  18  -2   1   24.60   12.10
 -18  -2  -1   36.50   12.20
  18  -2   1   45.20   18.20
  18   2   1   30.00   15.40
 -18   2  -1   41.50   20.30
 -18   2  -1   38.00   10.80
 -19  -2  -1   11.70   11.70
  19  -2   1   -6.20   11.20
  19  -2   1   10.80   15.00
 -19   2  -1    0.30   10.20
 -19   2  -1    2.20   20.60
  19   2   1    2.80   14.70
 -20  -2  -1   92.99   16.60
  20  -2   1   67.79   21.70
  20  -2   1   84.29   16.80
 -20   2  -1   74.49   16.00
 -20   2  -1  119.69   26.40
  20   2   1  102.29   20.30
  21  -2   1  -14.50   17.80
  21  -2   1   16.90   13.80
 -21  -2  -1   -6.00   12.40
 -21   2  -1   14.50   23.80
 -21   2  -1   22.90   12.80
  21   2   1   18.00   17.10
  22  -2   1   12.60   19.80
  22  -2   1    5.10   13.90
 -22  -2  -1    3.40   13.60
  22   2   1   24.10   19.40
 -22   2  -1   29.40   14.30
  23  -2   1   15.30   21.20
 -23  -2  -1   26.60   14.80
  23  -2   1    6.10   14.80
 -23   2  -1   49.00   14.90
  23   2   1    3.80   21.30
  24  -2   1  -10.30   21.30
  24  -2   1    8.00   15.40
 -24  -2  -1    2.70   14.60
 -24   2  -1    4.20   15.10
  24   2   1   35.10   20.50
  25  -2   1   11.60   19.80
 -25  -2  -1   17.40   15.60
 -25   2  -1   30.30   18.00
  25   2   1  -21.60   21.30
 -24  -3   1    4.00   15.40
  24  -3  -1  -11.70   23.90
 -24   3   1   20.30   16.30
  24   3  -1   -0.90   23.60
  23  -3  -1  108.99   29.30
  23  -3  -1   48.20   19.10
 -23  -3   1  131.19   20.50
  23   3  -1  142.29   25.10
 -23   3   1  105.29   22.10
  22  -3  -1  -14.80   19.80
 -22  -3   1   14.70   14.40
  22  -3  -1   12.40   13.90
 -22   3   1    8.30   14.40
  22   3  -1   25.70   20.30
  21  -3  -1   -2.80   13.10
 -21  -3   1   20.80   14.10
  21  -3  -1  -17.50   20.00
 -21   3   1   24.90   25.40
 -21   3   1   11.10   12.50
  21   3  -1   -3.00   19.50
  20  -3  -1   -3.50   18.50
 -20  -3   1   11.30   13.50
  20  -3  -1   -3.20   12.80
  20   3  -1    9.90   18.10
 -20   3   1   22.90   12.70
 -20   3   1    1.20   22.70
  19  -3  -1  -17.50   11.90
  19  -3  -1  -21.30   17.10
 -19  -3   1    7.30   13.00
 -19   3   1   -5.60   10.50
 -19   3   1   -4.40   21.40
  19   3  -1   18.20   16.00
 -19   3   1   -5.90   12.50
 -18  -3   1   30.50   13.30
  18  -3  -1   25.90   17.70
  18  -3  -1   52.69   13.20
 -18   3   1   41.10   21.70
 -18   3   1   41.20   10.90
 -18   3   1   28.70   11.30
  18   3  -1   41.90   15.90
  17  -3  -1   -1.50   10.70
 -17  -3   1    7.80   11.70
  17  -3  -1   -9.50   14.10
 -17   3   1   -2.70    9.10
 -17   3   1   -6.00   18.00
 -17   3   1    8.50    9.30
  17   3  -1   -1.60   13.60
  16  -3  -1   58.19   14.30
 -16  -3   1   65.29   14.60
  16  -3  -1   59.29   17.20
 -16   3   1   94.09   21.10
  16   3  -1   87.79   17.00
 -16   3   1  100.19   13.30
 -16   3   1   75.69   13.10
  15  -3  -1   19.10   13.20
  15  -3  -1    1.00    9.30
 -15  -3   1   13.40   10.80
 -15   3   1   17.70    8.10
 -15   3   1   19.60    8.50
  15   3  -1   12.30   12.50
 -15   3   1   29.30   14.10
  14  -3  -1   30.00   12.90
 -14  -3   1    3.70   10.10
  14  -3  -1   20.60    9.80
 -14   3   1   31.80    8.40
 -14   3   1   14.60   14.00
  14   3  -1   40.60   11.90
 -14   3   1   38.90    8.50
  13  -3  -1   70.29   15.00
  13  -3  -1   75.89   13.00
 -13  -3   1  101.69   14.00
  13   3  -1   65.99   11.50
 -13   3   1   82.19   11.90
 -13   3   1   93.09   17.70
 -13   3   1   95.89   12.30
  13   3  -1  105.39   14.90
  12  -3  -1    5.30   10.10
  12  -3  -1   17.30    8.20
 -12  -3   1   26.40    8.90
 -12   3   1   24.60   12.20
  12   3  -1   35.00   10.00
  12   3  -1   14.00    5.80
 -12   3   1   28.30    7.20
 -12   3   1   12.10    6.40
  11  -3  -1  554.64   62.79
  11  -3  -1  561.74   64.39
 -11   3   1  573.44   62.49
  11   3  -1  603.24   62.19
  11   3  -1  525.25   62.99
 -11   3   1  623.74   62.59
 -11   3   1  577.34   64.89
  10  -3  -1   19.00    9.40
  10  -3  -1   20.10    7.70
 -10   3   1   13.40    6.00
 -10   3   1   22.10   10.90
  10   3  -1   26.20    7.90
 -10   3   1   14.30    6.60
  10   3  -1   21.00    4.80
  10   3  -1   39.50    8.80
   9  -3  -1 1388.76  147.19
   9  -3  -1 1379.26  146.19
  -9   3   1 1416.86  146.19
  -9   3   1 1380.26  147.39
   9   3  -1 1386.06  146.19
  -9   3   1 1346.27  146.09
   9   3  -1 1359.96  146.19
   9   3  -1 1308.07  145.69
   8  -3  -1   17.30    8.70
   8  -3  -1    8.90    6.40
  -8   3   1    6.00    4.80
   8   3  -1    3.40    6.30
  -8   3   1    1.90    8.50
   8   3  -1    0.60    3.50
   8   3  -1    4.50    7.20
  -8   3   1    8.60    5.70
   7  -3  -1   23.40    8.60
  -7  -3   1    7.70    4.10
   7   3  -1    9.40    6.00
  -7   3   1   12.40    5.20
   7   3  -1   14.20    6.00
  -7   3   1    2.60    5.60
   7   3  -1    1.50    6.30
  -7   3   1    5.30    7.40
  -6  -3   1    0.20    4.10
   6  -3  -1   23.10    8.20
  -6   3   1   -6.00    5.20
   6   3  -1    5.50    5.00
  -6   3   1    9.20    7.90
  -6   3   1    5.20    4.80
   6   3  -1    1.60    5.60
   6   3  -1    1.10    5.70
   6   3  -1  -11.90    4.20
   5  -3  -1  404.26   40.80
  -5  -3   1  341.17   39.10
  -5   3   1  375.56   40.80
   5   3  -1  327.97   39.40
  -5   3   1  389.76   39.40
  -5   3   1  365.66   39.80
   5   3  -1  344.07   39.60
   5   3  -1  381.66   39.30
  -4  -3   1  283.17   30.80
   4  -3  -1  302.27   32.40
  -4  -3   1  276.97   30.80
  -4   3   1  302.57   32.40
   4   3  -1  244.98   31.20
   4   3  -1  290.77   30.90
  -4   3   1  293.37   31.00
  -4   3   1  275.97   31.40
  -3  -3   1   43.20    7.80
  -3  -3   1   46.30    7.90
   3  -3  -1   65.49    9.90
  -3   3   1   48.50    9.20
   3   3  -1   69.79    8.00
  -3   3   1   68.79    7.90
   3   3  -1   54.39    8.50
  -3   3   1   55.79    8.30
   2  -3  -1  266.67   29.10
  -2  -3   1  245.48   28.30
  -2  -3   1  243.58   28.20
   2   3  -1  241.48   28.40
  -2   3   1  261.57   27.90
  -2   3   1  243.18   28.70
   2   3  -1  276.27   27.90
  -2   3   1  250.87   28.30
  -1  -3   1  140.99   15.50
   1  -3  -1  121.39   16.20
  -1   3   1  118.19   14.70
  -1   3   1  126.19   15.30
   1   3  -1  129.49   15.80
  -1   3   1   99.19   15.20
   1   3  -1  130.89   14.80
   0  -3  -1   40.50    8.00
   0  -3   1   46.30    7.80
   0  -3  -1   53.99    9.50
   0   3   1   43.80    7.40
   0   3   1   43.80    7.60
   0   3  -1   39.60    7.50
   0   3  -1   42.80    7.10
   0   3   1   42.30    7.00
   0   3  -1   47.30    8.20
   1  -3   1  104.89   14.10
  -1  -3  -1   95.69   13.70
  -1  -3  -1   94.49   14.10
  -1   3  -1  103.79   12.70
  -1   3  -1  102.19   13.40
   1   3   1   85.09   12.70
  -1   3  -1  116.09   12.80
   1   3   1  104.99   12.50
   2  -3   1    3.00    5.80
  -2  -3  -1   -1.10    5.30
  -2  -3  -1   -0.60    6.20
   2   3   1    5.60    3.80
  -2   3  -1   -0.90    6.10
   2   3   1    3.20    4.30
  -2   3  -1   11.40    4.90
  -2   3  -1    6.30    5.10
  -3  -3  -1  284.87   32.00
  -3  -3  -1  299.67   32.10
   3  -3   1  317.47   32.80
   3   3   1  250.87   31.50
  -3   3  -1  276.37   32.90
  -3   3  -1  287.77   32.10
   3   3   1  315.17   31.30
  -3   3  -1  290.27   31.90
  -4  -3  -1  225.48   26.10
   4  -3   1  259.87   27.60
  -4   3  -1  232.98   26.10
   4   3   1  220.08   25.70
  -4   3  -1  216.78   26.30
   4   3   1  253.07   25.50
  -4   3  -1  224.58   27.40
   5  -3   1  298.27   30.50
  -5  -3  -1  226.08   28.80
  -5   3  -1  256.17   29.10
   5   3   1  252.87   28.40
   5   3   1  287.57   28.40
  -5   3  -1  240.38   30.30
  -5   3  -1  262.57   28.70
   6  -3   1  102.89   14.10
  -6  -3  -1   84.09   13.40
  -6   3  -1  110.69   12.50
   6   3   1  111.29   12.30
  -6   3  -1   95.19   14.50
  -6   3  -1  107.89   12.70
   6   3   1   82.19   12.40
  -7  -3  -1  183.28   22.90
   7  -3   1  208.78   24.40
   7   3   1  225.58   22.30
  -7   3  -1  191.98   23.90
   7   3   1  186.68   22.00
  -7   3  -1  204.88   22.20
  -7   3  -1  168.08   22.50
   8  -3   1  247.18   28.60
  -8  -3  -1  215.78   26.90
  -8   3  -1  239.18   26.50
  -8   3  -1  209.48   28.20
   8   3   1  264.17   26.80
  -8   3  -1  217.28   26.80
   8   3   1  255.77   26.40
  -9  -3  -1  910.31  100.09
   9  -3   1  900.41  100.89
   9   3   1  918.61   99.69
  -9   3  -1  934.01  101.09
  -9   3  -1  924.91   99.79
  -9   3  -1  955.60   99.89
   9   3   1  936.41   99.79
   9   3   1  975.80   99.79
  10  -3   1    5.40    8.70
 -10  -3  -1    3.60    6.10
  10  -3   1    2.70    6.80
  10   3   1   11.00    7.40
 -10   3  -1    5.60    5.80
 -10   3  -1   10.10    9.30
  10   3   1    6.10    5.40
 -10   3  -1   13.70    5.50
  11  -3   1 1008.20  109.49
 -11  -3  -1 1027.60  109.49
  11  -3   1  980.40  110.59
  11   3   1 1035.60  109.39
 -11   3  -1 1058.49  111.19
 -11   3  -1  995.10  109.29
 -11   3  -1 1059.29  109.29
  11   3   1  993.80  109.49
  12  -3   1  112.59   18.40
  12  -3   1  141.89   17.20
 -12  -3  -1  129.69   16.90
 -12   3  -1  126.09   15.80
 -12   3  -1  104.29   19.10
 -12   3  -1  131.29   16.10
  12   3   1  123.89   16.50
  12   3   1  139.19   17.40
  13  -3   1  153.98   18.90
 -13  -3  -1  126.99   18.30
  13  -3   1  110.99   19.60
 -13   3  -1  172.08   22.90
  13   3   1  138.69   18.40
 -13   3  -1  133.99   17.70
 -13   3  -1  139.09   17.50
  13   3   1  144.69   19.10
 -14  -3  -1   66.59   12.70
  14  -3   1   77.29   15.00
  14  -3   1   61.89   12.20
  14   3   1   54.29   11.50
 -14   3  -1   73.19   17.20
 -14   3  -1   63.69   11.00
  14   3   1   65.89   13.80
 -14   3  -1   64.49   10.40
  15  -3   1    4.50   12.80
  15  -3   1    6.70   10.40
 -15  -3  -1   19.80   10.50
 -15   3  -1   23.20   16.10
 -15   3  -1   13.20    7.90
  15   3   1    8.30   12.00
 -15   3  -1   17.60    8.40
 -16  -3  -1   45.60   12.70
  16  -3   1   49.20   16.10
  16  -3   1   25.30   11.90
  16   3   1   38.60   14.80
 -16   3  -1   49.10    9.90
 -16   3  -1   43.20   10.70
 -16   3  -1   54.39   18.30
  17  -3   1   -4.10   14.20
  17  -3   1  -11.40   10.30
 -17  -3  -1   21.80   11.60
 -17   3  -1    1.30    8.40
 -17   3  -1   11.60   19.40
  17   3   1   -8.30   13.90
 -17   3  -1    7.90    9.20
  18  -3   1   81.99   15.60
  18  -3   1   59.99   20.10
 -18  -3  -1   77.79   15.90
 -18   3  -1   86.79   15.10
 -18   3  -1   92.49   24.60
  18   3   1   97.79   19.50
  19  -3   1    6.70   13.30
  19  -3   1   44.30   20.20
 -19  -3  -1   19.60   12.90
 -19   3  -1   16.90   11.40
 -19   3  -1   25.50   23.20
  19   3   1   21.10   17.20
  20  -3   1   -8.00   16.90
 -20  -3  -1   19.80   13.50
  20  -3   1   17.00   12.60
 -20   3  -1    3.00   12.30
  20   3   1   26.10   18.10
 -20   3  -1    7.80   24.60
 -21  -3  -1   43.00   15.60
  21  -3   1   53.99   15.60
  21  -3   1   30.30   21.20
  21   3   1   65.59   20.30
 -21   3  -1   72.79   27.80
 -21   3  -1   55.59   14.70
  22  -3   1   -3.20   21.50
 -22  -3  -1   26.20   14.50
  22  -3   1   17.20   14.60
 -22   3  -1   30.70   28.10
  22   3   1   15.30   20.20
 -22   3  -1   11.70   13.40
  23  -3   1   70.99   20.50
 -23  -3  -1  116.59   20.70
  23  -3   1   88.39   29.60
  23   3   1  109.89   25.70
 -23   3  -1  177.18   38.00
 -23   3  -1  144.19   22.30
  24  -3   1  -34.80   23.20
  24  -3   1    3.90   18.10
 -24  -3  -1   -8.90   14.70
 -24   3  -1   -5.60   15.60
  24   3   1   19.80   22.90
  24  -4  -1   57.89   21.00
 -24   4   1   59.39   18.10
  23  -4  -1   33.50   17.40
  23  -4  -1  -10.90   24.00
  23   4  -1   79.69   23.40
 -23   4   1   61.29   18.50
 -23   4   1   97.79   35.40
  22  -4  -1  -26.00   23.90
  22  -4  -1   34.40   17.00
 -22   4   1   11.90   14.90
  22   4  -1   35.10   20.50
 -22   4   1   61.89   33.60
  21  -4  -1   92.89   21.40
  21  -4  -1   86.19   25.40
 -21   4   1  206.98   38.20
 -21   4   1  145.39   21.60
  21   4  -1  194.48   26.10
  20  -4  -1   18.90   16.60
  20  -4  -1  -32.70   19.80
 -20   4   1   26.30   13.30
 -20   4   1   29.10   27.00
  20   4  -1   36.40   18.20
  19  -4  -1   16.40   18.20
  19  -4  -1   26.40   13.70
 -19   4   1   59.99   25.00
 -19   4   1   43.80   14.10
  19   4  -1   62.89   18.30
 -19   4   1   42.50   13.30
  18  -4  -1   -7.60   11.70
  18  -4  -1   -9.50   17.00
 -18   4   1  -21.10   21.60
 -18   4   1  -23.90   10.70
  18   4  -1    2.30   16.60
 -18   4   1    2.60   11.20
  17  -4  -1    3.30   17.50
  17  -4  -1    2.60   11.70
 -17   4   1   11.40   10.80
 -17   4   1   -4.20   10.10
  17   4  -1   -2.50   15.10
 -17   4   1   18.40   21.50
  16  -4  -1   15.00   17.20
  16  -4  -1   27.60   11.90
 -16   4   1   37.00   11.50
  16   4  -1   41.70   15.50
 -16   4   1   39.90   20.60
 -16   4   1   26.60   10.30
  15  -4  -1   -5.70   14.30
  15  -4  -1   -5.70   10.70
 -15   4   1    6.00    9.60
  15   4  -1   25.40   13.70
 -15   4   1   12.00   17.00
 -15   4   1   15.30    9.20
  14  -4  -1   25.00   14.90
  14  -4  -1   50.29   12.20
 -14   4   1   62.09   10.60
  14   4  -1   51.69   14.20
 -14   4   1   58.99   11.00
 -14   4   1   34.20   15.20
  13  -4  -1    5.30   12.70
  13  -4  -1   23.20    9.90
  13   4  -1   12.50   12.30
 -13   4   1   17.30    7.90
 -13   4   1   16.70    8.70
 -13   4   1   27.10   15.00
  13   4  -1   12.40   10.00
  12  -4  -1   74.39   13.00
  12  -4  -1   55.99   15.60
 -12   4   1   95.99   13.00
  12   4  -1   81.69   14.70
 -12   4   1   72.39   11.90
 -12   4   1   82.59   18.20
  12   4  -1   83.99   13.50
  11  -4  -1   60.09   11.10
  11  -4  -1   39.80   13.30
  11   4  -1   64.79   11.20
  11   4  -1   55.99   11.90
 -11   4   1   56.19   14.70
 -11   4   1   58.49    9.80
 -11   4   1   54.99   10.70
  10  -4  -1  160.08   20.20
  10  -4  -1  179.48   22.70
 -10   4   1  154.38   20.30
  10   4  -1  149.59   20.30
 -10   4   1  157.08   19.60
 -10   4   1  160.48   22.70
  10   4  -1  163.88   20.20
   9  -4  -1  716.33   80.99
   9  -4  -1  777.02   79.49
   9   4  -1  697.53   79.39
  -9   4   1  760.22   79.59
  -9   4   1  741.83   79.19
   9   4  -1  730.93   79.39
  -9   4   1  726.13   81.29
   8  -4  -1  118.49   16.60
  -8  -4   1   86.99   12.80
  -8   4   1  127.49   14.40
   8   4  -1  112.99   14.10
  -8   4   1   86.09   15.70
   8   4  -1  133.89   14.10
  -8   4   1  111.79   14.20
   7  -4  -1  887.41   94.89
  -7  -4   1  867.11   93.19
  -7   4   1  870.91   93.59
  -7   4   1  896.81   93.89
   7   4  -1  873.91   93.49
  -7   4   1  858.91   94.99
   7   4  -1  856.01   93.69
  -6  -4   1   28.60    6.70
   6  -4  -1   59.19   11.10
  -6   4   1   40.00    8.20
   6   4  -1   34.40    8.00
  -6   4   1   45.80    7.50
  -6   4   1   42.40   10.50
   6   4  -1   60.49    8.00
   5  -4  -1  108.59   14.70
  -5  -4   1   75.09   11.40
  -5   4   1   95.39   11.70
   5   4  -1   89.39   12.30
   5   4  -1   96.99   11.70
  -5   4   1   80.59   12.20
  -5   4   1   83.79   14.00
   4  -4  -1   13.40    9.10
  -4  -4   1   -4.50    5.60
  -4  -4   1   -8.10    5.70
   4   4  -1    1.30    6.30
   4   4  -1   -4.60    5.60
  -4   4   1    0.80    5.40
  -4   4   1    0.60    8.00
  -4   4   1    7.20    6.30
  -3  -4   1  153.18   19.20
   3  -4  -1  196.38   21.50
  -3  -4   1  126.99   18.80
  -3   4   1  163.08   19.20
  -3   4   1  152.58   18.40
   3   4  -1  142.79   19.00
   3   4  -1  165.08   18.20
  -3   4   1  141.39   19.90
   2  -4  -1  104.29   13.40
  -2  -4   1   76.59   12.40
  -2  -4   1   76.09   11.60
   2   4  -1   76.29   12.00
  -2   4   1   63.79   12.00
   2   4  -1   88.89   10.90
  -2   4   1   74.29   11.00
  -2   4   1   80.69   11.40
  -1  -4   1  540.55   57.19
  -1  -4   1  556.94   57.49
   1  -4  -1  597.44   57.99
   1  -4  -1  528.45   57.59
  -1   4   1  496.95   57.19
   1   4  -1  486.85   56.89
  -1   4   1  510.75   56.59
   1   4  -1  491.55   57.19
  -1   4   1  494.35   56.89
   0  -4  -1   17.10    8.40
   0  -4   1   22.70    8.00
   0  -4  -1   18.80   10.20
   0   4  -1   18.10    7.60
   0   4   1   22.90    6.30
   0   4  -1   17.10    6.30
   0   4   1    8.80    6.80
   0   4  -1    4.40    6.60
   0   4   1   15.40    6.70
   1  -4   1  323.27   34.20
  -1  -4  -1  281.97   33.90
  -1  -4  -1  301.87   34.20
   1   4   1  290.27   33.30
  -1   4  -1  318.97   33.00
  -1   4  -1  288.07   34.10
   1   4   1  263.47   33.20
  -1   4  -1  303.57   33.40
   2  -4   1  358.86   35.10
  -2  -4  -1  286.27   34.20
  -2  -4  -1  298.17   34.40
   2   4   1  296.67   33.90
  -2   4  -1  306.47   35.20
  -2   4  -1  315.57   34.10
  -2   4  -1  319.37   33.70
   2   4   1  260.97   33.60
   3  -4   1   85.79   12.60
  -3  -4  -1   85.79   11.40
  -3  -4  -1   70.39   11.40
  -3   4  -1   84.49   10.80
   3   4   1   84.79    9.80
   3   4   1   62.39   10.30
  -3   4  -1   61.19   10.80
  -3   4  -1   62.09   12.40
  -4  -4  -1  108.89   14.80
   4  -4   1  106.19   15.30
   4   4   1   92.99   12.90
  -4   4  -1   90.69   15.10
  -4   4  -1  117.99   14.00
   4   4   1   96.39   13.10
  -4   4  -1  131.99   13.90
   5  -4   1  269.17   30.90
  -5  -4  -1  258.47   29.00
  -5   4  -1  250.87   28.70
  -5   4  -1  237.48   29.20
   5   4   1  264.37   28.10
  -5   4  -1  244.78   30.60
   5   4   1  250.47   28.40
   6  -4   1   26.40    9.60
  -6  -4  -1   34.10    7.80
   6   4   1   40.20    6.70
  -6   4  -1   26.30    7.70
   6   4   1   32.10    6.60
  -6   4  -1   42.60   10.60
  -6   4  -1   31.50    7.00
  -7  -4  -1  110.49   16.20
   7  -4   1  124.99   17.80
   7   4   1  125.59   15.30
  -7   4  -1  147.19   15.80
  -7   4  -1  116.09   18.20
   7   4   1  125.69   15.40
  -7   4  -1  132.79   16.10
   8  -4   1   46.60   11.70
  -8  -4  -1   47.60    9.30
   8   4   1   65.49    9.10
   8   4   1   53.39    8.50
  -8   4  -1   48.50    9.50
  -8   4  -1   55.29    8.90
  -8   4  -1   54.59   12.30
  -9  -4  -1    4.20    6.50
   9  -4   1    5.00    9.60
  -9   4  -1   -3.00    6.40
   9   4   1   16.70    7.60
  -9   4  -1   13.30    9.80
  -9   4  -1    7.60    5.90
   9   4   1   17.60    6.20
 -10  -4  -1  404.56   47.20
  10  -4   1  422.76   49.60
 -10   4  -1  450.55   49.99
  10   4   1  461.35   47.70
  10   4   1  397.46   46.90
 -10   4  -1  463.35   47.50
 -10   4  -1  443.86   47.20
  10   4   1  425.86   47.10
 -11  -4  -1  400.66   49.10
  11  -4   1  463.15   49.50
  11  -4   1  385.86   51.49
 -11   4  -1  455.05   52.19
  11   4   1  470.55   49.70
  11   4   1  445.46   48.80
 -11   4  -1  481.85   49.10
  11   4   1  452.45   49.00
 -11   4  -1  475.75   49.40
  12  -4   1  244.68   30.20
  12  -4   1  227.18   33.30
 -12   4  -1  235.78   29.20
  12   4   1  279.47   31.10
 -12   4  -1  270.07   29.60
 -12   4  -1  250.57   34.10
  13  -4   1  410.46   48.90
  13  -4   1  391.46   46.50
  13   4   1  398.86   47.00
 -13   4  -1  403.16   46.00
 -13   4  -1  435.46   50.49
 -13   4  -1  437.86   46.10
  14  -4   1   -5.30    9.90
  14  -4   1    3.20   12.90
 -14   4  -1   10.50   15.80
  14   4   1   23.80   12.20
 -14   4  -1    2.30    8.30
 -14   4  -1   -1.00    7.60
  15  -4   1   62.49   12.80
  15  -4   1   32.70   15.40
  15   4   1   54.79   14.80
 -15   4  -1   48.50   10.70
 -15   4  -1   66.79   20.00
 -15   4  -1   49.50   11.10
  16  -4   1  -18.70   14.60
  16  -4   1   10.30   11.10
 -16   4  -1   11.30   19.80
  16   4   1   18.40   14.30
 -16   4  -1   -6.20    9.60
 -16   4  -1   -4.10    9.20
  17  -4   1   22.40   12.60
  17  -4   1   11.40   16.90
 -17   4  -1   52.99   12.00
 -17   4  -1   40.80   22.00
  17   4   1   32.60   16.90
 -17   4  -1   19.00   11.60
  18  -4   1   -6.20   13.80
  18  -4   1  -22.20   17.70
 -18   4  -1   11.60   11.70
 -18   4  -1  -21.80   22.10
  18   4   1   -2.40   15.80
 -18   4  -1   -2.50   11.30
  19  -4   1  -12.20   17.70
  19  -4   1   -5.10   12.50
 -19   4  -1    6.10   25.60
 -19   4  -1    9.10   12.40
  19   4   1   -1.80   17.10
  20  -4   1  -11.90   20.00
  20  -4   1  -12.00   13.20
 -20   4  -1  -17.80   12.60
 -20   4  -1   32.20   28.20
  20   4   1   11.90   18.90
  21  -4   1  -13.00   18.70
  21  -4   1   -9.70   14.20
 -21   4  -1   -3.30   14.20
 -21   4  -1   36.80   30.80
  21   4   1   27.50   25.70
  22  -4   1    7.10   23.60
  22  -4   1   12.50   15.30
 -22   4  -1   99.59   35.30
 -22   4  -1   33.50   15.30
  23  -4   1  -51.79   22.20
  23  -4   1    1.30   16.00
 -23   4  -1    7.70   16.00
 -23   4  -1   32.90   33.50
  22  -5  -1   -2.00   27.60
  22  -5  -1    4.30   17.90
 -22   5   1   32.10   16.90
 -22   5   1   75.79   38.00
  21  -5  -1  -50.59   18.60
 -21   5   1   15.60   31.80
 -21   5   1   -2.90   15.20
  20  -5  -1   11.60   22.10
 -20   5   1   23.50   30.70
 -20   5   1   40.30   16.10
  19  -5  -1  -49.10   19.40
  19  -5  -1   14.40   14.20
 -19   5   1    6.00   13.90
 -19   5   1   29.50   27.80
 -19   5   1   30.70   14.40
  18  -5  -1   -7.60   14.00
  18  -5  -1   22.00   18.40
 -18   5   1   26.00   13.50
 -18   5   1  -16.40   12.90
  18   5  -1   38.30   22.50
 -18   5   1  -21.30   25.00
  17  -5  -1   -7.90   12.70
  17  -5  -1  -18.90   17.40
 -17   5   1   12.70   12.00
 -17   5   1   12.20   24.50
  17   5  -1   19.30   16.50
 -17   5   1    5.90   12.40
  16  -5  -1   23.30   18.40
  16  -5  -1   43.00   15.60
 -16   5   1   58.19   14.30
  16   5  -1   54.19   17.20
 -16   5   1   51.39   12.80
 -16   5   1   53.19   24.20
  15  -5  -1  132.29   27.50
  15  -5  -1  152.18   22.90
 -15   5   1  204.48   31.20
  15   5  -1  161.98   24.70
 -15   5   1  206.98   23.10
 -15   5   1  147.99   22.40
  14  -5  -1  109.19   15.50
  14  -5  -1   48.70   18.70
  14   5  -1   70.89   16.60
 -14   5   1   58.99   20.10
 -14   5   1   64.19   15.30
 -14   5   1  101.69   14.30
  13  -5  -1   -1.60   14.30
  13  -5  -1   19.50   11.90
 -13   5   1   13.10   10.90
 -13   5   1   20.30   17.60
 -13   5   1   29.10    9.50
  13   5  -1   23.10   12.40
  12  -5  -1   -4.90    9.80
  12  -5  -1    2.70   14.10
  12   5  -1    6.40   11.00
 -12   5   1  -20.50    9.90
 -12   5   1    0.30   15.90
 -12   5   1    0.50    8.10
  11  -5  -1   11.70   10.20
  11  -5  -1   -2.90   13.40
 -11   5   1    9.80   14.80
 -11   5   1    5.80    9.60
  11   5  -1   13.50   10.00
 -11   5   1    1.90    7.50
  10  -5  -1   26.20   13.70
  10  -5  -1   36.80   10.40
  10   5  -1   37.70    9.80
  10   5  -1   44.60   10.50
 -10   5   1   46.70   10.30
 -10   5   1   25.10   12.90
 -10   5   1   34.90    8.80
   9  -5  -1  241.58   35.90
   9   5  -1  268.17   32.40
   9   5  -1  288.17   32.00
  -9   5   1  300.27   36.40
  -9   5   1  282.27   32.00
  -9   5   1  290.37   33.10
  -8  -5   1  552.34   64.39
   8  -5  -1  543.35   67.39
   8   5  -1  621.44   65.29
  -8   5   1  628.74   65.09
   8   5  -1  592.04   64.89
  -8   5   1  618.24   65.79
  -8   5   1  661.73   67.79
   7  -5  -1  176.28   25.80
  -7  -5   1  185.98   22.40
   7   5  -1  195.18   23.60
  -7   5   1  208.88   23.30
  -7   5   1  205.68   24.30
   7   5  -1  201.98   23.00
  -7   5   1  192.28   27.40
   6  -5  -1  282.57   38.20
  -6  -5   1  275.57   34.60
  -6   5   1  358.86   35.20
  -6   5   1  354.16   37.80
   6   5  -1  328.07   35.70
  -6   5   1  299.97   35.70
   6   5  -1  321.97   34.90
  -5  -5   1    5.50    6.70
   5  -5  -1    2.70   10.60
  -5  -5   1   -4.80    6.80
   5   5  -1   21.00    7.00
  -5   5   1    7.90   10.30
   5   5  -1    9.90    7.40
  -5   5   1   12.60    6.60
  -5   5   1   11.10    7.60
  -4  -5   1  188.28   25.00
   4  -5  -1  223.28   28.20
  -4  -5   1  173.68   25.20
  -4   5   1  231.78   25.60
  -4   5   1  238.98   27.00
   4   5  -1  219.48   25.60
  -4   5   1  206.58   24.70
   4   5  -1  232.58   24.60
   3  -5  -1   11.50   10.50
  -3  -5   1   18.30    8.20
  -3  -5   1   -6.40    8.40
   3   5  -1   30.50    7.20
   3   5  -1   20.00    8.30
  -3   5   1   14.40    9.60
  -3   5   1    9.40    6.90
  -3   5   1   13.70    7.70
   2  -5  -1   13.60   12.20
   2  -5  -1    8.70   10.20
  -2  -5   1   -0.60    8.40
  -2  -5   1   -7.40    9.40
  -2   5   1   -1.20    6.70
   2   5  -1    3.70    7.70
  -2   5   1   -8.30    7.00
   2   5  -1    7.30    7.20
  -2   5   1   -0.80    8.60
  -1  -5   1   19.70    9.20
   1  -5  -1    6.60   12.90
  -1  -5   1    4.40   11.20
   1  -5  -1   17.90    9.60
  -1   5   1   12.10    7.50
  -1   5   1   11.60    7.20
   1   5  -1   10.00    7.70
   1   5  -1   14.00    7.00
  -1   5   1    7.60    8.40
   1   5  -1   18.50    8.70
   0  -5  -1    6.60    9.70
   0  -5   1   24.80    9.60
   0  -5  -1   22.30   11.80
   0   5   1    8.90    7.10
   0   5   1   12.80    8.50
   0   5   1   22.30    7.80
   0   5  -1   14.10    7.10
   0   5  -1   20.40    7.70
   0   5  -1   22.50    8.70
   1  -5   1   42.70   11.00
  -1  -5  -1   27.30   11.40
  -1  -5  -1   30.90   10.30
   1   5   1   45.10    9.50
   1   5   1   37.40    8.00
   1   5   1   41.80    9.00
  -1   5  -1   45.80   11.00
  -1   5  -1   28.50    8.30
  -1   5  -1   37.00    9.00
  -2  -5  -1   17.60    9.80
   2  -5   1   27.60   10.70
  -2  -5  -1   27.40   11.10
  -2   5  -1   45.30    8.50
   2   5   1   48.30    8.90
   2   5   1   32.30    8.70
  -2   5  -1   29.40    8.50
  -2   5  -1   28.80   10.60
   3  -5   1  157.78   23.90
  -3  -5  -1  148.59   22.60
  -3  -5  -1  168.28   22.70
   3   5   1  170.48   21.30
  -3   5  -1  187.88   22.00
  -3   5  -1  164.08   21.20
  -3   5  -1  234.18   24.80
   3   5   1  185.88   21.80
  -4  -5  -1  198.08   26.30
   4  -5   1  233.18   28.30
  -4  -5  -1  212.98   26.40
   4   5   1  222.58   25.50
  -4   5  -1  198.88   26.10
  -4   5  -1  213.98   27.90
  -4   5  -1  202.18   25.70
   4   5   1  258.67   25.00
  -5  -5  -1  382.16   42.20
   5  -5   1  364.66   43.90
   5   5   1  365.16   41.40
  -5   5  -1  346.17   43.60
  -5   5  -1  367.06   42.20
  -5   5  -1  399.76   41.80
   5   5   1  394.16   41.10
  -6  -5  -1  281.97   33.30
   6  -5   1  282.27   35.90
   6   5   1  290.67   32.30
  -6   5  -1  313.47   33.30
  -6   5  -1  283.17   33.70
   6   5   1  294.17   32.80
  -6   5  -1  303.57   35.90
   7  -5   1   45.60   13.10
  -7  -5  -1   50.59    9.90
  -7   5  -1   48.70   10.60
   7   5   1   49.10    8.90
   7   5   1   59.19    9.10
  -7   5  -1   70.99   14.00
  -7   5  -1   48.70    9.60
  -8  -5  -1  254.17   29.30
   8  -5   1  216.38   32.70
  -8   5  -1  258.87   29.80
  -8   5  -1  254.37   32.70
   8   5   1  241.78   28.50
   8   5   1  257.87   28.70
  -8   5  -1  253.97   29.00
  -9  -5  -1   62.69   11.00
   9  -5   1   58.09   15.20
  -9   5  -1   66.79   15.80
  -9   5  -1   67.49   11.20
   9   5   1   70.89   11.10
  -9   5  -1   78.59   12.50
  10  -5   1   68.59   18.50
 -10   5  -1  118.69   17.00
  10   5   1  146.39   15.90
 -10   5  -1  128.19   21.00
 -10   5  -1  114.49   15.80
  11  -5   1  175.78   26.90
 -11   5  -1  198.98   23.90
 -11   5  -1  196.88   25.20
  11   5   1  185.18   24.20
 -11   5  -1  197.28   28.30
  12  -5   1   49.50   16.30
  12  -5   1   42.80   13.30
 -12   5  -1   69.69   12.90
 -12   5  -1   43.40   17.30
  12   5   1   83.39   13.20
 -12   5  -1   50.79   11.10
  13  -5   1    7.20   10.70
  13  -5   1    7.20   14.10
 -13   5  -1   26.80   17.60
  13   5   1   37.60   12.70
 -13   5  -1   24.90    9.70
 -13   5  -1   22.20   10.90
  14  -5   1  222.58   38.70
  14  -5   1  313.97   36.00
 -14   5  -1  330.87   41.60
 -14   5  -1  300.17   36.30
  14   5   1  289.77   36.90
 -14   5  -1  342.47   36.20
  15  -5   1   -1.80   11.30
  15  -5   1  -20.30   14.30
 -15   5  -1   -5.30   20.10
 -15   5  -1   12.90   11.40
 -15   5  -1   13.60   10.10
  16  -5   1   23.10   13.20
  16  -5   1   -5.70   17.40
 -16   5  -1   20.30   10.90
 -16   5  -1   22.30   23.10
 -16   5  -1   27.80   11.70
  17  -5   1  -27.30   18.20
  17  -5   1    6.00   12.90
 -17   5  -1    7.30   12.30
 -17   5  -1    6.70   23.80
 -17   5  -1    2.00   11.60
  18  -5   1  -11.30   18.50
 -18   5  -1   19.00   12.70
 -18   5  -1    0.00   13.50
 -18   5  -1   41.80   27.50
  19  -5   1  -26.10   19.30
  19  -5   1    4.20   15.10
 -19   5  -1   -7.60   29.10
 -19   5  -1    2.10   13.80
  20  -5   1  -11.00   20.70
  20  -5   1   30.50   16.20
 -20   5  -1   47.40   31.70
 -20   5  -1   38.80   16.90
  21  -5   1    0.30   15.70
  21  -5   1  -27.40   21.80
 -21   5  -1   15.30   32.90
 -21   5  -1    2.00   18.20
  22  -5   1   10.90   16.60
  22  -5   1   -8.60   22.70
 -22   5  -1   12.90   35.50
 -22   5  -1   -3.30   15.30
  21  -6  -1  -12.10   19.30
  21  -6  -1  -33.70   24.00
 -21   6   1    4.40   16.60
 -21   6   1   -3.70   36.60
  20  -6  -1   44.00   21.50
  20  -6  -1    2.20   21.10
 -20   6   1   -4.40   19.10
 -20   6   1   27.60   18.50
 -20   6   1   76.79   38.90
  19  -6  -1    5.60   22.60
 -19   6   1   21.20   16.10
 -19   6   1   57.89   35.30
 -19   6   1   29.70   16.80
  18  -6  -1  -10.10   24.10
 -18   6   1   23.00   16.00
 -18   6   1   44.60   32.50
 -18   6   1   36.90   16.30
  17  -6  -1   66.09   26.10
  17  -6  -1   79.69   18.40
 -17   6   1  109.09   18.60
 -17   6   1  113.79   20.00
 -17   6   1   65.79   32.80
  16  -6  -1   71.99   15.80
  16  -6  -1    3.90   19.50
 -16   6   1   30.90   26.40
 -16   6   1   29.20   13.80
 -16   6   1   47.70   16.30
  15  -6  -1   25.20   20.10
 -15   6   1   83.39   16.90
 -15   6   1   53.29   15.30
 -15   6   1   66.29   27.40
  14  -6  -1   -5.80   16.40
  14  -6  -1  -13.00   18.00
 -14   6   1  -12.70   10.90
 -14   6   1   19.50   14.70
 -14   6   1  -25.50   21.50
  13  -6  -1   42.40   13.20
  13  -6  -1   12.50   18.30
 -13   6   1   24.20   12.00
 -13   6   1   31.10   15.00
 -13   6   1   23.60   22.20
  12  -6  -1   -0.40   13.20
  12  -6  -1   19.50   17.80
 -12   6   1   31.10   13.50
 -12   6   1   23.50   20.60
 -12   6   1   29.80   11.00
  11  -6  -1   30.70   18.30
  11  -6  -1   89.89   13.80
  11   6  -1   65.99   14.30
 -11   6   1   51.09   12.50
 -11   6   1   58.59   15.20
 -11   6   1   52.09   20.50
  10  -6  -1  172.58   20.30
  10  -6  -1  108.49   23.70
 -10   6   1  125.79   24.80
 -10   6   1  150.38   20.90
  10   6  -1  127.59   18.70
 -10   6   1  132.59   19.30
   9  -6  -1   17.00   15.70
   9   6  -1   13.10    9.60
  -9   6   1    1.70   10.90
  -9   6   1   20.20   10.00
  -9   6   1   29.90   16.40
   8  -6  -1   25.60   16.30
   8   6  -1   61.19   11.30
  -8   6   1   50.29   11.30
  -8   6   1   47.40   13.40
  -8   6   1   57.79   17.10
   7  -6  -1   35.70   17.50
  -7   6   1   93.49   18.50
  -7   6   1   69.49   13.10
   7   6  -1  104.39   13.50
  -7   6   1   82.79   14.70
   7   6  -1   85.49   13.40
   6  -6  -1   85.29   19.90
  -6   6   1  118.89   20.30
   6   6  -1  111.09   15.40
  -6   6   1  116.99   15.80
   6   6  -1  105.59   16.30
  -6   6   1  123.19   17.80
  -5  -6   1  166.68   20.60
   5  -6  -1  158.98   23.60
  -5  -6   1  118.09   19.30
  -5   6   1  145.79   20.60
  -5   6   1  150.18   22.90
  -5   6   1  166.78   19.40
   5   6  -1  155.28   20.80
   5   6  -1  156.08   19.60
   4  -6  -1  466.55   52.19
  -4  -6   1  385.36   49.70
  -4  -6   1  406.76   49.80
  -4   6   1  433.06   49.10
  -4   6   1  444.16   50.09
   4   6  -1  508.35   49.90
   4   6  -1  405.76   49.80
  -4   6   1  513.05   51.59
   3  -6  -1  471.05   56.29
  -3  -6   1  464.75   52.19
  -3  -6   1  414.56   52.09
   3  -6  -1  446.46   53.79
  -3   6   1  423.26   52.09
   3   6  -1  431.86   51.29
  -3   6   1  468.05   50.89
  -3   6   1  530.45   53.49
   3   6  -1  492.75   51.89
  -2  -6   1  214.98   27.60
   2  -6  -1  221.78   29.20
  -2  -6   1  186.88   27.50
   2  -6  -1  208.68   30.40
  -2   6   1  246.08   28.30
   2   6  -1  233.88   27.10
  -2   6   1  190.38   26.30
   2   6  -1  190.38   26.00
   2   6  -1  179.78   25.10
  -2   6   1  204.88   25.30
  -1  -6   1  192.78   27.60
   1  -6  -1  181.68   28.30
  -1  -6   1  199.78   27.30
   1  -6  -1  171.48   26.60
   1   6  -1  191.78   25.20
   1   6  -1  183.68   24.20
  -1   6   1  194.88   24.30
  -1   6   1  189.48   25.30
   1   6  -1  224.78   26.70
  -1   6   1  229.18   26.80
   0  -6  -1   50.59   14.50
   0  -6   1   48.20   14.20
   0  -6  -1   27.10   16.60
   0  -6   1   54.29   16.90
   0   6  -1   58.09   13.50
   0   6  -1   49.80   11.00
   0   6   1   42.10   12.10
   0   6  -1   65.09   12.10
   0   6   1   74.49   12.90
   0   6   1   46.90   10.70
   1  -6   1  102.59   17.30
  -1  -6  -1   88.59   18.50
  -1  -6  -1   91.79   17.10
   1  -6   1   83.09   20.90
  -1   6  -1   97.69   14.50
  -1   6  -1   93.59   15.10
   1   6   1  101.99   15.40
   1   6   1  105.49   15.70
  -1   6  -1   92.89   16.70
   1   6   1   91.39   14.00
  -2  -6  -1   38.70   12.60
  -2  -6  -1   15.60   13.90
   2  -6   1   12.90   12.90
   2   6   1   35.50   10.30
   2   6   1   15.90    9.40
  -2   6  -1   40.20   10.50
  -2   6  -1   37.50   12.70
  -2   6  -1   13.30    9.40
   2   6   1   48.80   10.50
   3  -6   1  359.06   47.30
  -3  -6  -1  369.66   46.10
  -3  -6  -1  346.17   46.30
  -3   6  -1  440.76   45.00
   3   6   1  391.56   45.70
  -3   6  -1  409.16   46.00
  -3   6  -1  449.95   48.00
   3   6   1  443.76   45.40
  -4  -6  -1   -2.10   10.50
   4  -6   1   11.80   12.90
  -4  -6  -1  -10.20   10.50
   4   6   1    6.80    8.50
  -4   6  -1   14.70   12.70
  -4   6  -1    9.50    8.40
  -4   6  -1   17.00   10.00
   4   6   1   17.80    9.60
   5  -6   1  174.58   25.30
  -5  -6  -1  147.39   23.50
  -5   6  -1  170.48   23.20
   5   6   1  183.08   22.80
  -5   6  -1  215.58   26.30
  -5   6  -1  187.28   22.70
   5   6   1  176.58   21.50
  -6  -6  -1   25.50   10.00
   6  -6   1   14.30   14.00
  -6   6  -1   17.50   13.90
   6   6   1   14.50    8.40
  -6   6  -1   10.50   10.40
  -6   6  -1   18.10    9.20
   7  -6   1   21.70   14.80
  -7   6  -1   45.10   15.70
  -7   6  -1   30.90   12.40
  -7   6  -1   50.89   10.20
   8  -6   1  273.87   40.40
  -8   6  -1  356.06   41.90
  -8   6  -1  294.37   37.40
  -8   6  -1  335.87   36.70
   9  -6   1   -3.90   14.20
  -9   6  -1   27.80   10.10
  -9   6  -1    5.20   15.70
  -9   6  -1    4.60   11.40
  10  -6   1   45.20   17.40
 -10   6  -1   64.69   19.70
 -10   6  -1   47.30   12.30
 -10   6  -1   49.10   13.60
  11  -6   1    0.70   15.70
 -11   6  -1   -9.20   11.30
 -11   6  -1   -3.20   17.60
 -11   6  -1    4.10   10.10
  12  -6   1   -1.70   16.20
  12  -6   1   18.10   12.30
 -12   6  -1   40.90   11.50
 -12   6  -1   38.50   20.10
 -12   6  -1   31.70   13.40
  13  -6   1   25.70   12.90
  13  -6   1   -2.80   17.10
 -13   6  -1  -21.10   20.30
 -13   6  -1   -0.60   10.60
 -13   6  -1   16.10   13.10
  14  -6   1   22.20   19.80
  14  -6   1   61.79   15.90
 -14   6  -1   88.29   16.50
 -14   6  -1  121.09   27.50
 -14   6  -1   68.39   16.20
  15  -6   1  157.58   23.50
  15  -6   1   89.79   25.10
 -15   6  -1  114.29   22.60
 -15   6  -1  186.58   33.70
 -15   6  -1  222.78   24.30
  16  -6   1    7.70   18.70
  16  -6   1   22.10   15.40
 -16   6  -1   51.69   14.30
 -16   6  -1   52.99   17.70
 -16   6  -1   90.09   29.30
  17  -6   1   62.99   26.20
 -17   6  -1  173.88   22.60
 -17   6  -1  132.39   21.20
 -17   6  -1  191.48   37.30
  18  -6   1   15.30   16.70
  18  -6   1   -4.90   23.10
 -18   6  -1   34.20   17.00
 -18   6  -1   41.00   30.60
 -18   6  -1   44.10   17.40
  19  -6   1   33.10   24.80
  19  -6   1   71.89   20.60
 -19   6  -1  159.78   21.10
 -19   6  -1  117.69   38.20
  20  -6   1  -12.40   22.90
 -20   6  -1   37.00   38.70
 -20   6  -1    6.20   15.70
  19  -7  -1    2.20   24.50
 -19   7   1   26.10   19.70
 -19   7   1   69.49   41.60
  18  -7  -1   30.20   18.40
  18  -7  -1  -17.10   20.50
 -18   7   1   62.59   37.50
 -18   7   1   46.70   20.00
 -18   7   1   35.90   17.60
  17  -7  -1    3.30   17.10
  17  -7  -1  -29.40   19.70
 -17   7   1   38.60   18.90
 -17   7   1   -8.50   33.40
 -17   7   1   26.80   19.00
  16  -7  -1   41.10   19.00
  16  -7  -1   -8.40   19.90
 -16   7   1   11.50   18.70
 -16   7   1   35.50   18.40
 -16   7   1    8.70   33.20
  15  -7  -1   49.60   23.90
 -15   7   1  133.29   35.60
 -15   7   1  152.28   23.10
 -15   7   1  137.99   21.60
  14  -7  -1    1.60   20.90
 -14   7   1   46.70   17.70
 -14   7   1   77.89   29.90
 -14   7   1   52.99   20.30
  13  -7  -1   85.89   27.40
  13  -7  -1  130.29   21.10
 -13   7   1  134.19   23.20
 -13   7   1  173.28   33.90
 -13   7   1  107.99   22.00
  12  -7  -1  271.17   40.70
 -12   7   1  368.66   48.00
 -12   7   1  305.07   39.20
 -12   7   1  331.87   40.40
  11  -7  -1   -1.60   19.50
  11  -7  -1   66.09   17.70
 -11   7   1   54.09   16.40
 -11   7   1   56.29   25.00
 -11   7   1   17.30   13.80
  10  -7  -1  206.18   27.30
  10  -7  -1  121.99   30.60
 -10   7   1  212.88   28.50
 -10   7   1  204.38   26.90
 -10   7   1  229.58   34.50
   9  -7  -1   36.00   19.60
  -9   7   1   36.90   21.10
  -9   7   1   23.40   14.80
  -9   7   1   25.70   12.90
   8  -7  -1    4.60   17.60
  -8   7   1   -8.80   18.60
  -8   7   1  -13.80   12.20
  -8   7   1   11.10   13.10
   7  -7  -1   -1.30   17.70
  -7   7   1    9.70   17.80
  -7   7   1   -0.30   10.90
  -7   7   1   -9.80   13.10
   6  -7  -1   -9.20   16.60
  -6   7   1    4.10   10.60
  -6   7   1   -5.70   17.50
  -6   7   1   11.20   14.00
   5  -7  -1   -4.10   16.90
   5  -7  -1  -44.50   21.30
  -5   7   1   13.10   13.20
  -5   7   1   26.90   17.20
  -5   7   1   11.10   11.10
   5   7  -1    4.00   12.00
   4  -7  -1   -1.00   16.80
   4  -7  -1   -9.60   20.70
   4   7  -1   17.70   12.10
  -4   7   1    2.80   16.20
  -4   7   1    0.70   12.00
   4   7  -1   17.20   12.30
  -4   7   1   -0.70   10.40
   3  -7  -1  166.28   26.90
  -3  -7   1  200.88   25.00
   3  -7  -1  135.69   29.00
  -3   7   1  206.08   26.90
  -3   7   1  180.68   22.80
  -3   7   1  178.88   24.10
   3   7  -1  140.69   23.00
   3   7  -1  112.99   21.70
   3   7  -1  174.48   24.20
  -2  -7   1   12.60   16.10
   2  -7  -1    1.20   21.50
   2  -7  -1   31.10   17.10
  -2  -7   1   21.90   14.10
  -2   7   1   22.90   11.70
  -2   7   1   39.00   15.50
   2   7  -1  -15.30   10.50
   2   7  -1   38.60   13.50
  -2   7   1   21.40   13.10
   2   7  -1   22.90   12.40
   1  -7  -1  448.86   49.50
  -1  -7   1  314.17   49.70
  -1  -7   1  388.36   47.70
   1  -7  -1  346.37   48.50
   1   7  -1  393.76   45.70
  -1   7   1  395.76   45.30
  -1   7   1  494.45   48.90
   1   7  -1  362.76   46.30
   1   7  -1  422.16   47.30
  -1   7   1  400.16   46.70
   0  -7   1   46.00   24.00
   0  -7  -1   72.49   23.80
   0  -7  -1  139.69   22.40
   0  -7   1  124.39   22.00
   0   7   1  125.39   19.60
   0   7  -1  128.69   19.70
   0   7   1  235.78   24.20
   0   7   1  123.59   20.40
   0   7  -1  142.39   21.80
   0   7  -1  122.89   18.60
   1  -7   1  308.17   44.00
  -1  -7  -1  362.76   43.40
   1  -7   1  318.67   46.10
  -1  -7  -1  265.37   43.90
   1   7   1  334.47   41.30
  -1   7  -1  317.57   40.50
  -1   7  -1  364.16   41.70
  -1   7  -1  441.46   43.90
   1   7   1  363.86   41.80
   1   7   1  355.96   41.10
   2  -7   1  230.98   37.90
  -2  -7  -1  205.08   33.60
  -2  -7  -1  284.47   34.20
   2  -7   1  234.08   34.10
  -2   7  -1  309.57   35.50
   2   7   1  229.28   30.00
   2   7   1  247.78   31.90
  -2   7  -1  244.48   32.30
  -2   7  -1  236.48   30.90
   2   7   1  253.47   31.80
  -3  -7  -1   51.79   15.10
  -3  -7  -1   15.50   14.70
   3  -7   1    2.60   16.20
  -3   7  -1   34.60   16.90
  -3   7  -1   17.70   11.80
  -3   7  -1   32.20   12.80
   3   7   1   24.30   12.10
   3   7   1   18.40   11.60
   4  -7   1   40.50   17.30
  -4  -7  -1   40.70   13.20
   4   7   1   17.20   12.80
  -4   7  -1   14.60   13.80
  -4   7  -1   43.30   17.10
  -4   7  -1   21.40   11.30
   5  -7   1   27.90   17.70
  -5   7  -1   39.90   14.30
  -5   7  -1    9.20   12.20
   5   7   1   41.70   13.50
  -5   7  -1   76.29   19.10
   6  -7   1   82.19   24.60
  -6   7  -1  170.78   21.20
   6   7   1  137.79   21.20
  -6   7  -1  155.78   22.30
  -6   7  -1  171.98   26.80
   7  -7   1   94.09   25.40
  -7   7  -1  159.08   21.50
  -7   7  -1  150.98   23.80
  -7   7  -1  196.78   28.40
   8  -7   1  179.18   35.90
  -8   7  -1  278.47   33.90
  -8   7  -1  309.17   35.30
  -8   7  -1  328.87   40.80
   9  -7   1   10.70   18.10
  -9   7  -1   43.80   23.90
  -9   7  -1   24.30   14.70
  -9   7  -1   35.50   15.60
  10  -7   1   27.10   19.00
 -10   7  -1   55.39   16.70
 -10   7  -1   40.90   15.70
 -10   7  -1   65.29   23.60
  11  -7   1  126.69   28.40
 -11   7  -1  185.48   33.20
 -11   7  -1  156.48   24.40
 -11   7  -1  168.08   25.10
  12  -7   1  -19.40   18.30
 -12   7  -1   -7.90   14.00
 -12   7  -1   18.90   24.90
 -12   7  -1   17.10   16.10
  13  -7   1   36.70   14.90
  13  -7   1   -8.60   18.50
 -13   7  -1   27.50   15.90
 -13   7  -1   48.40   17.50
 -13   7  -1   52.69   27.90
  14  -7   1   13.80   19.40
 -14   7  -1   23.70   16.90
 -14   7  -1    1.30   14.00
 -14   7  -1   47.80   30.20
  15  -7   1   17.00   15.90
  15  -7   1    4.90   19.40
 -15   7  -1    2.10   14.50
 -15   7  -1   26.90   31.00
 -15   7  -1   -5.90   16.50
  16  -7   1   -4.00   15.40
  16  -7   1  -35.30   18.90
 -16   7  -1    4.00   20.60
 -16   7  -1   -9.20   30.80
 -16   7  -1   16.40   17.90
  17  -7   1  -11.50   19.90
 -17   7  -1   22.80   18.20
 -17   7  -1   15.10   20.30
 -17   7  -1   43.80   34.40
  18  -7   1   -5.50   20.40
  18  -7   1  -17.20   23.00
 -18   7  -1   -1.50   33.80
 -18   7  -1  -11.50   15.70
 -18   7  -1   -3.40   17.40
  16  -8  -1    9.30   25.50
 -16   8   1   21.20   20.90
 -16   8   1    0.40   17.80
 -16   8   1   73.89   41.00
  15  -8  -1  -14.90   21.30
  15  -8  -1   -5.70   16.90
 -15   8   1   25.60   37.10
 -15   8   1   18.70   20.30
  14  -8  -1   78.79   20.70
  14  -8  -1    1.80   22.20
 -14   8   1   81.89   38.60
 -14   8   1   71.79   22.80
  13  -8  -1  -15.30   23.20
 -13   8   1  -18.00   30.40
 -13   8   1   23.40   24.30
  12  -8  -1   36.20   25.20
 -12   8   1   70.79   19.00
 -12   8   1   92.99   26.50
 -12   8   1  113.89   33.60
  11  -8  -1   18.60   22.40
  11  -8  -1   22.00   15.40
 -11   8   1   11.50   28.60
 -11   8   1   46.40   23.20
 -11   8   1   27.90   16.00
  10  -8  -1   -0.70   22.60
 -10   8   1   30.80   20.80
 -10   8   1   16.10   17.90
 -10   8   1   60.09   27.80
   9  -8  -1    0.70   21.00
  -9   8   1   19.00   24.70
  -9   8   1    5.30   16.70
  -9   8   1   35.80   18.20
   8  -8  -1  -17.30   20.20
  -8   8   1   10.20   17.20
   8   8  -1   -0.20   14.40
  -8   8   1   -7.60   22.50
  -8   8   1   12.50   17.10
   7  -8  -1  -95.49   32.60
   7  -8  -1  -15.50   20.00
  -7   8   1    4.20   16.20
  -7   8   1    1.80   17.00
   7   8  -1    6.80   14.00
  -7   8   1   13.40   21.60
   6  -8  -1  -25.40   28.20
   6  -8  -1   11.80   21.00
  -6   8   1   76.09   22.40
  -6   8   1   41.90   15.40
  -6   8   1   56.89   19.00
   6   8  -1   50.69   16.10
   5  -8  -1  -57.09   29.70
   5  -8  -1   -3.20   21.30
  -5   8   1    8.10   23.40
  -5   8   1    2.00   13.60
   5   8  -1    7.30   14.20
  -5   8   1   10.50   17.00
   5   8  -1   -2.80   13.20
   4  -8  -1   -1.00   20.00
   4  -8  -1    5.90   28.60
   4   8  -1   10.50   14.20
  -4   8   1   -0.10   15.20
  -4   8   1   54.69   20.80
  -4   8   1    5.00   13.50
   4   8  -1   19.40   14.70
   3  -8  -1  -22.60   26.90
   3  -8  -1   21.20   20.20
   3   8  -1    7.60   13.30
  -3   8   1   47.60   18.90
  -3   8   1    7.20   13.80
   3   8  -1   -9.80   14.40
  -3   8   1   13.80   16.50
   2  -8  -1  248.18   43.10
   2  -8  -1  271.47   39.10
  -2   8   1  281.67   35.30
   2   8  -1  217.18   34.60
  -2   8   1  330.07   39.40
  -2   8   1  305.87   37.00
   2   8  -1  280.97   35.90
  -1  -8   1   50.59   20.30
   1  -8  -1   13.70   27.80
   1  -8  -1   60.09   20.50
  -1   8   1   38.40   17.00
   1   8  -1   36.80   16.40
  -1   8   1   30.40   16.90
   1   8  -1   58.69   18.20
   1   8  -1   29.50   14.90
  -1   8   1   75.39   18.90
   0  -8  -1  456.15   65.29
   0  -8  -1  489.55   62.19
   0  -8   1  513.35   62.09
   0   8  -1  604.14   60.99
   0   8  -1  467.75   57.99
   0   8   1  510.55   60.59
   0   8  -1  568.54   59.89
   0   8   1  432.46   58.49
   1  -8   1   24.50   25.90
   1  -8   1   78.29   22.80
  -1   8  -1  103.99   22.10
   1   8   1   68.89   19.20
  -1   8  -1   93.59   17.70
  -1   8  -1   91.09   19.20
   1   8   1   61.39   17.20
   2  -8   1  157.98   27.80
   2  -8   1  119.29   32.50
  -2   8  -1  185.68   29.80
   2   8   1  142.39   24.30
  -2   8  -1  168.18   25.20
  -2   8  -1  179.38   25.90
   2   8   1  138.39   23.70
   3  -8   1  -31.20   28.20
   3  -8   1   37.30   20.90
  -3   8  -1   63.39   20.00
   3   8   1   35.10   15.10
  -3   8  -1   20.80   17.00
  -3   8  -1   31.90   14.20
   3   8   1   37.70   15.50
   4  -8   1  -17.80   29.50
   4  -8   1    5.40   19.40
   4   8   1   32.30   15.50
  -4   8  -1   31.20   17.50
  -4   8  -1   66.59   20.90
   4   8   1   -9.00   13.20
  -4   8  -1   40.90   14.40
   5  -8   1  -19.20   19.10
   5  -8   1  -21.00   25.20
  -5   8  -1   12.60   16.50
   5   8   1   27.40   15.20
  -5   8  -1   23.30   24.00
  -5   8  -1   -3.40   16.50
   5   8   1   -2.40   13.10
   6  -8   1    3.40   19.50
  -6   8  -1    6.40   14.00
   6   8   1    1.90   14.50
  -6   8  -1   17.80   18.80
  -6   8  -1   46.40   26.40
   7  -8   1  -15.20   19.40
   7   8   1   24.70   14.80
  -7   8  -1    8.50   14.30
  -7   8  -1   13.40   17.80
  -7   8  -1   50.69   27.80
   8  -8   1    0.10   21.40
  -8   8  -1   78.29   26.30
  -8   8  -1   68.99   16.90
   8   8   1   32.70   15.70
  -8   8  -1   79.19   19.50
   9  -8   1   -4.60   20.00
  -9   8  -1  -15.00   14.00
   9   8   1   22.90   14.80
  -9   8  -1    2.70   16.40
  -9   8  -1   24.30   25.30
  10  -8   1   32.00   22.50
 -10   8  -1   54.49   18.50
 -10   8  -1   40.60   16.70
 -10   8  -1   48.70   27.80
  11  -8   1  -39.00   19.10
 -11   8  -1   21.20   29.50
 -11   8  -1   21.00   21.90
 -11   8  -1   -0.30   15.50
  12  -8   1   65.79   26.90
  12  -8   1   98.99   20.80
 -12   8  -1   95.59   21.20
 -12   8  -1  121.89   35.10
 -12   8  -1  139.69   28.40
  13  -8   1   -7.00   22.70
 -13   8  -1   15.40   19.30
 -13   8  -1  -15.50   31.60
 -13   8  -1    6.80   18.70
  14  -8   1   22.20   23.80
  14  -8   1  133.79   22.10
 -14   8  -1  117.59   38.30
 -14   8  -1  102.09   23.20
  15  -8   1  -11.90   21.60
 -15   8  -1   29.20   22.80
 -15   8  -1   45.90   34.50
  16  -8   1  -25.30   21.70
 -16   8  -1   -8.30   36.40
 -16   8  -1    7.80   20.20
 -16   8  -1    6.10   17.80
  13  -9  -1 -102.89   34.40
  13  -9  -1  -28.00   25.10
 -13   9   1   24.20   24.70
 -13   9   1   73.69   43.30
  12  -9  -1  -12.70   27.00
 -12   9   1   43.40   28.30
 -12   9   1   52.49   19.80
 -12   9   1   64.49   38.20
  11  -9  -1  -63.79   34.80
  11  -9  -1   38.60   26.50
 -11   9   1   34.00   22.00
 -11   9   1   84.09   29.60
 -11   9   1   61.69   35.30
  10  -9  -1  -52.79   34.40
  10  -9  -1   30.70   24.30
 -10   9   1   55.69   21.70
  10   9  -1   31.60   17.80
 -10   9   1   40.40   22.00
   9  -9  -1    7.90   25.50
   9  -9  -1 -134.29   42.10
   9   9  -1   35.10   17.40
  -9   9   1   15.00   20.30
  -9   9   1   -8.20   20.30
   8  -9  -1  -22.10   42.80
   8  -9  -1   23.40   24.30
  -8   9   1   13.50   20.90
   8   9  -1   27.60   17.60
   7  -9  -1   49.30   26.30
   7  -9  -1   -2.30   33.50
   7   9  -1   58.89   18.90
  -7   9   1   73.39   25.00
   7   9  -1   60.99   18.10
   6  -9  -1   16.40   37.80
   6  -9  -1   43.50   25.50
   6   9  -1   52.09   18.90
   6   9  -1   23.20   16.80
  -6   9   1   32.20   21.00
  -6   9   1   51.39   25.70
  -6   9   1   71.39   18.00
   5  -9  -1   70.59   26.70
   5  -9  -1   49.10   38.20
   5   9  -1   46.80   18.40
  -5   9   1  160.58   33.80
  -5   9   1   60.89   18.90
  -5   9   1   96.49   28.30
   5   9  -1   86.39   20.20
   4  -9  -1  113.59   37.50
   4  -9  -1  107.19   28.60
   4   9  -1  104.79   22.40
  -4   9   1  136.19   25.00
   4   9  -1   63.89   21.60
  -4   9   1   89.59   20.90
   3  -9  -1   97.29   27.50
   3   9  -1   63.99   21.90
  -3   9   1  132.49   24.40
  -3   9   1   97.79   20.70
   3   9  -1   89.89   22.20
   2  -9  -1   79.69   25.20
  -2   9   1   46.80   19.90
   2   9  -1   53.79   18.90
   2   9  -1   33.80   19.30
  -2   9   1   50.99   20.60
  -1   9   1   22.10   21.90
  -1   9   1  -11.80   15.10
   1   9  -1   18.40   15.90
   1   9  -1   27.60   19.00
   0   9  -1   64.69   21.10
   0   9   1   77.99   18.30
   0   9  -1   32.20   17.70
   0   9   1   91.29   21.00
  -1   9  -1   -1.10   16.00
   1   9   1    5.00   17.50
  -1   9  -1   35.30   19.20
   1   9   1   35.00   19.50
   2  -9   1  137.59   31.10
  -2   9  -1  164.18   25.90
   2   9   1   95.39   23.90
   2   9   1  106.39   23.90
  -2   9  -1  117.59   22.70
   3  -9   1   42.20   24.50
  -3   9  -1   32.10   17.80
   3   9   1   73.19   19.80
  -3   9  -1   27.10   26.50
   3   9   1   59.09   19.20
  -3   9  -1   60.09   25.70
   4  -9   1   94.09   46.70
   4  -9   1  119.49   29.40
  -4   9  -1  159.88   34.70
   4   9   1  138.49   24.80
  -4   9  -1  153.48   29.00
   4   9   1  104.39   24.30
  -4   9  -1  144.49   24.20
   5  -9   1  -56.69   29.50
   5  -9   1   -1.90   22.70
   5   9   1   34.00   19.70
   5   9   1    5.10   16.60
  -5   9  -1   57.99   22.40
  -5   9  -1   23.80   28.90
  -5   9  -1    4.80   16.20
   6  -9   1  -87.49   36.10
   6  -9   1    5.50   23.30
  -6   9  -1   53.99   23.70
  -6   9  -1   -4.50   16.50
   6   9   1   20.80   16.30
   6   9   1   49.99   18.00
  -6   9  -1   81.49   34.70
   7  -9   1    2.00   23.10
   7  -9   1 -105.59   35.90
  -7   9  -1   16.20   20.20
   7   9   1   28.30   17.30
   7   9   1   31.60   16.50
  -7   9  -1   47.60   21.20
   8  -9   1  -20.40   22.80
   8  -9   1 -120.79   37.00
   8   9   1   29.00   17.40
  -8   9  -1   43.00   21.30
   9  -9   1  -13.60   23.30
  -9   9  -1   20.10   20.40
  -9   9  -1   -0.80   20.00
  10  -9   1  -18.40   24.10
 -10   9  -1   33.00   20.70
 -10   9  -1   14.40   21.20
  11  -9   1  -13.60   25.00
 -11   9  -1   16.80   18.00
 -11   9  -1    4.80   26.20
  12  -9   1  -24.80   25.80
 -12   9  -1   21.10   27.00
 -12   9  -1  -11.80   18.00
  -8  10   1   24.50   24.00
   8  10  -1   49.20   21.20
   7 -10  -1   55.89   30.50
  -7  10   1   85.59   30.00
   7  10  -1   39.40   22.20
   7  10  -1   93.79   23.10
  -7  10   1   76.29   22.00
   6 -10  -1   52.49   28.30
   6  10  -1   44.30   21.00
   6  10  -1   44.20   22.40
   5 -10  -1  125.89   32.70
   5  10  -1   75.69   25.40
  -5  10   1  100.89   27.00
  -5  10   1  134.09   28.40
   5  10  -1  143.79   27.30
   4  10  -1   52.39   24.40
   4  10  -1   -8.00   18.20
  -4  10   1   20.40   28.30
   3  10  -1   33.00   21.50
   3  10  -1   82.99   24.70
  -3  10   1   29.20   22.50
   2  10  -1   61.19   26.20
   2  10  -1   10.20   17.80
  -2  10   1   16.20   20.80
  -2  10   1    7.80   23.70
   1  10  -1   54.59   24.20
   1  10  -1   -8.10   20.40
  -1  10   1   18.30   20.70
  -1  10   1   27.10   27.70
   0  10   1   43.60   24.80
   0  10  -1   55.79   27.20
   0  10   1   -2.10   18.30
   0  10  -1   -9.60   18.50
  -1  10  -1   47.50   25.90
  -1  10  -1  -18.30   20.80
   1  10   1  101.09   28.70
   1  10   1  -13.40   20.00
  -2  10  -1   15.50   18.70
   2  10   1   52.69   22.50
   2  10   1   -6.30   20.70
  -2  10  -1   36.80   22.70
  -3  10  -1   66.79   30.40
   3  10   1  102.19   23.60
   3  10   1   33.00   21.90
   4  10   1    7.40   18.50
  -4  10  -1   51.79   23.40
  -4  10  -1  -28.80   20.40
   4  10   1   39.60   22.00
  -5  10  -1  135.69   31.60
   5  10   1  178.68   32.20
  -5  10  -1  196.08   32.60
   6 -10   1   55.39   29.20
  -6  10  -1   33.20   23.70
  -6  10  -1  102.29   34.50
   6  10   1   78.69   25.50
   7 -10   1   16.30   27.70
  -7  10  -1   52.69   20.80
   7  10   1   67.39   21.90
  -7  10  -1   91.89   28.60
  -8  10  -1   15.30   23.50
  26   0  -2   -8.70   19.30
 -26   0   2  -10.00   16.00
 -25   0   2   -8.20   15.60
  25   0  -2   33.00   20.50
  24   0  -2   -8.80   16.60
 -24   0   2  -25.00   14.70
 -23   0   2   19.70   14.80
  23   0  -2   -0.90   16.40
  22   0  -2  -16.40   14.80
 -22   0   2   26.80   13.70
 -21   0   2    8.40   12.50
  21   0  -2   12.90   15.40
  20   0  -2  180.98   27.40
 -20   0   2  139.99   21.80
  20   0  -2  159.78   23.90
  19   0  -2    3.50   13.20
  19   0  -2    2.50   12.90
 -19   0   2  -15.60   10.60
  18   0  -2   34.40   13.60
 -18   0   2   39.00   11.60
  18   0  -2   41.10   14.10
  17   0  -2    6.50   11.50
  17   0  -2   12.70   11.90
 -17   0   2   -5.90    9.20
 -17   0   2  -26.80    8.70
  16   0  -2  171.88   20.20
 -16   0   2  125.69   16.20
 -16   0   2   90.79   16.70
  16   0  -2  127.19   18.50
  15   0  -2    3.40    9.50
 -15   0   2    8.50    8.10
  15   0  -2   11.80    9.10
 -15   0   2   -1.30    6.00
 -14   0   2  666.63   69.99
  14   0  -2  633.74   70.99
  14   0  -2  671.63   71.29
 -14   0   2  624.74   70.59
 -13   0   2   -3.50    5.20
 -13   0   2   -2.80    6.40
  13   0  -2    9.00    7.30
  13   0  -2   11.80    8.40
  12   0  -2   28.60    7.40
  12   0  -2    1.20    7.70
 -12   0   2    2.90    5.30
 -12   0   2   15.40    6.40
  11   0  -2   12.60    6.70
  11   0  -2   -6.20    7.30
 -11   0   2   -2.20    4.80
 -11   0   2   -5.90    5.70
  10   0  -2   67.19    9.60
 -10   0   2   53.89    8.40
  10   0  -2   60.79   10.20
 -10   0   2   53.79    8.90
   9   0  -2    3.90    6.40
  -9   0   2    0.40    4.60
  -9   0   2    1.60    4.90
   9   0  -2   12.70    5.70
  -8   0   2  234.28   26.60
   8   0  -2  233.38   26.90
  -8   0   2  231.08   26.50
   8   0  -2  258.17   27.00
  -7   0   2   -3.30    3.90
   7   0  -2   -0.60    4.70
  -7   0   2   -1.70    4.10
   7   0  -2    8.90    4.40
   6   0  -2  406.76   43.80
   6   0  -2  411.86   43.90
  -6   0   2  404.66   43.70
  -6   0   2  400.36   43.70
  -5   0   2    7.00    3.60
   4   0  -2   73.09   10.70
  -4   0   2   81.09   10.60
   4   0  -2  113.69   11.00
  -4   0   2   90.59   10.90
  -3   0   2   -2.70    2.60
   3   0  -2    2.10    2.70
   3   0  -2    6.10    2.50
  -3   0   2   -2.90    2.10
  -3   0   2    3.60    2.50
   2   0  -2 2303.47  248.18
  -2   0   2 2298.97  248.08
  -2   0   2 2502.45  248.08
   2   0  -2 2486.45  248.08
  -2   0   2 2121.69  248.18
  -2   0   2 2285.87  248.08
   2   0  -2 2346.27  248.08
   2   0  -2 2352.46  247.98
  -1   0   2   -0.30    1.70
   1   0  -2    2.20    1.60
  -1   0   2    0.30    2.00
   1   0  -2   -0.10    1.20
  -1   0   2    1.60    1.80
   0   0  -2 1281.37  148.09
   0   0   2 1519.85  148.39
   0   0   2 1392.76  148.19
   0   0   2 1391.56  148.09
   1   0   2    0.60    1.30
  -1   0  -2    0.60    2.00
   1   0   2   -2.20    2.10
  -1   0  -2   -1.70    1.20
  -1   0  -2    0.00    1.90
   2   0   2   38.40    5.30
  -2   0  -2   58.29    6.60
   2   0   2   40.10    5.70
   2   0   2   46.30    5.80
  -2   0  -2   39.20    5.20
  -2   0  -2   41.60    6.00
  -3   0  -2    4.20    2.10
  -3   0  -2   -2.00    4.20
   3   0   2    0.90    3.10
  -3   0  -2   -1.60    3.30
  -4   0  -2  753.12   83.09
  -4   0  -2  828.92   82.79
  -4   0  -2  732.53   83.39
   4   0   2  793.32   83.09
   5   0   2    2.30    4.10
  -5   0  -2    3.80    2.90
  -5   0  -2   -6.70    4.50
   5   0   2    5.40    2.40
   5   0   2   -0.60    4.00
  -6   0  -2 1275.47  140.59
  -6   0  -2 1334.17  140.19
   6   0   2 1326.47  140.59
   6   0   2 1334.27  140.29
  -7   0  -2   -3.40    3.40
   7   0   2   -5.30    4.50
   7   0   2   -0.30    4.80
  -7   0  -2    2.60    5.60
  -8   0  -2  306.27   33.70
  -8   0  -2  300.97   34.80
   8   0   2  313.77   34.50
   8   0   2  314.27   34.10
  -9   0  -2    2.30    4.50
   9   0   2   -3.20    6.00
  -9   0  -2    0.20    6.90
   9   0   2   -9.30    5.40
 -10   0  -2   39.60    6.70
  10   0   2   29.80    7.70
 -10   0  -2   32.70    9.30
  10   0   2   29.60    7.80
 -11   0  -2   -4.70    8.10
  11   0   2   -1.40    6.80
 -11   0  -2    0.10    5.20
  11   0   2    3.70    6.60
 -12   0  -2   84.79   14.10
  12   0   2   86.99   13.00
  12   0   2   96.19   12.60
 -12   0  -2   66.29   11.10
  13   0   2   -7.80    7.80
  13   0   2    7.40    7.60
 -13   0  -2    2.20    9.90
 -13   0  -2   -2.70    6.00
  14   0   2   42.90   10.60
  14   0   2   48.40   10.40
 -14   0  -2   55.09   13.40
 -14   0  -2   38.40    8.90
  15   0   2   14.30    9.20
  15   0   2   -0.10    9.00
 -15   0  -2    0.00    7.50
 -15   0  -2    1.40   11.90
  16   0   2   26.60   11.60
 -16   0  -2   28.90   14.90
 -16   0  -2   34.90    9.40
  16   0   2   38.40   12.00
  17   0   2    4.30   11.40
  17   0   2    4.50   10.60
 -17   0  -2  -13.30    8.60
 -18   0  -2  176.68   23.90
  18   0   2  240.88   28.70
  18   0   2  161.58   25.60
 -19   0  -2   22.60   10.70
  19   0   2    1.60   12.90
  19   0   2   10.80   13.20
  20   0   2  325.27   36.80
 -20   0  -2  247.88   31.70
  20   0   2  200.28   31.90
 -21   0  -2    1.80   11.60
  21   0   2   -0.80   14.30
  21   0   2   -4.50   14.60
  22   0   2  141.99   24.20
  22   0   2  162.18   26.00
 -22   0  -2  139.39   21.70
  23   0   2   -2.00   16.10
 -23   0  -2   -3.30   13.10
 -24   0  -2   -0.20   14.10
  24   0   2    3.50   17.90
  25   0   2  -11.70   19.00
 -25   0  -2    6.20   15.20
 -26  -1   2    1.90   16.40
  26  -1  -2   -4.70   17.40
 -26   1   2   31.50   17.20
  26   1  -2   -0.50   22.20
  25  -1  -2   48.30   18.90
 -25  -1   2   52.49   17.00
  25   1  -2   21.70   20.40
 -25   1   2   14.70   16.60
  24  -1  -2  -19.60   21.30
 -24  -1   2   10.90   14.80
  24  -1  -2  -20.50   15.70
  24   1  -2  -15.40   17.70
 -24   1   2   13.50   15.20
  23  -1  -2   77.09   22.00
 -23  -1   2  101.49   18.20
  23  -1  -2   90.89   20.40
  23   1  -2   78.39   22.00
 -23   1   2   84.39   18.00
 -22  -1   2    8.30   13.70
  22  -1  -2   -6.70   17.70
  22  -1  -2   15.90   14.40
 -22   1   2   27.80   13.60
  22   1  -2   14.30   17.00
 -21  -1   2   37.40   13.80
  21  -1  -2   30.80   14.60
  21   1  -2   29.20   17.60
 -21   1   2   41.80   13.40
 -20  -1   2  -10.60   12.00
  20  -1  -2    2.40   16.00
  20  -1  -2  -11.40   13.60
  20   1  -2   15.60   14.90
 -20   1   2   -4.00   11.50
  19  -1  -2   -5.20   13.60
  19  -1  -2    4.90   11.90
 -19  -1   2   -3.10   11.30
  19   1  -2   -3.90   15.10
  19   1  -2    5.50   13.50
 -19   1   2    2.60   10.80
  18  -1  -2  422.66   52.39
 -18  -1   2  416.26   51.89
  18  -1  -2  494.15   54.59
 -18   1   2  512.45   51.39
  18   1  -2  481.45   52.89
  18   1  -2  455.95   54.79
 -18   1   2  438.76   51.89
  17  -1  -2  221.48   27.80
  17  -1  -2  222.68   25.50
 -17  -1   2  179.38   24.00
  17   1  -2  143.19   25.30
 -17   1   2  193.58   23.70
  17   1  -2  196.28   26.40
 -17   1   2  187.88   22.90
 -16  -1   2  198.68   27.30
  16  -1  -2  253.37   29.70
  16  -1  -2  208.38   27.60
  16   1  -2  204.38   27.40
 -16   1   2  244.18   27.00
  16   1  -2  207.18   28.00
 -16   1   2  225.28   25.60
  15  -1  -2  346.47   44.90
 -15  -1   2  376.66   44.80
  15  -1  -2  426.96   46.30
 -15   1   2  396.86   44.70
 -15   1   2  424.36   43.90
  15   1  -2  413.96   45.40
  15   1  -2  398.66   45.30
  14  -1  -2  113.59   16.50
 -14  -1   2  107.29   15.30
 -14  -1   2  119.29   13.70
  14  -1  -2  108.99   15.60
  14   1  -2  101.29   15.00
 -14   1   2   97.09   14.40
 -14   1   2  102.59   19.00
 -14   1   2  112.79   14.80
  14   1  -2  133.39   16.40
 -13  -1   2  356.16   37.80
  13  -1  -2  333.07   39.10
  13  -1  -2  373.76   40.20
 -13  -1   2  309.17   39.00
  13   1  -2  356.36   39.20
 -13   1   2  364.46   38.70
 -13   1   2  355.66   41.80
 -13   1   2  341.17   38.40
  13   1  -2  340.87   39.00
 -12  -1   2  588.84   64.99
 -12  -1   2  614.94   64.29
  12  -1  -2  595.34   65.09
  12  -1  -2  605.24   65.89
 -12   1   2  592.24   64.79
 -12   1   2  605.04   64.59
  12   1  -2  596.34   64.89
  12   1  -2  612.14   65.09
 -12   1   2  574.74   66.49
  11  -1  -2  105.49   13.80
  11  -1  -2   67.29   12.50
 -11  -1   2  107.29   11.70
 -11  -1   2   95.49   12.60
  11   1  -2   95.09   13.20
 -11   1   2   72.59   11.70
 -11   1   2   72.99   15.10
 -11   1   2   98.19   11.90
  11   1  -2   91.69   13.00
 -10  -1   2  518.05   56.79
 -10  -1   2  542.25   56.19
  10  -1  -2  537.45   57.49
  10  -1  -2  532.85   56.79
 -10   1   2  498.05   58.39
  10   1  -2  517.15   56.99
  10   1  -2  489.95   56.59
 -10   1   2  524.15   56.49
 -10   1   2  544.25   56.49
  -9  -1   2  108.29   13.80
   9  -1  -2  146.49   16.00
   9  -1  -2  129.39   14.20
  -9  -1   2  116.79   13.20
  -9   1   2  108.59   13.10
   9   1  -2   77.89   13.70
   9   1  -2  102.19   13.90
  -9   1   2  119.49   16.60
  -9   1   2   97.49   13.20
   8  -1  -2  109.29   13.40
  -8  -1   2   86.19   11.30
  -8  -1   2   88.69   10.90
   8  -1  -2   94.69   11.50
   8   1  -2   78.29   10.60
  -8   1   2   75.19   12.80
  -8   1   2   86.59   10.60
   8   1  -2   74.79   11.30
  -8   1   2   86.99   10.70
  -7  -1   2   15.30    5.20
  -7  -1   2   12.00    4.00
   7  -1  -2   19.00    6.00
   7  -1  -2   18.10    5.20
   7   1  -2   20.10    5.60
  -7   1   2   13.90    4.10
  -7   1   2   12.20    4.30
   7   1  -2   -2.40    3.70
  -7   1   2   14.80    7.70
  -6  -1   2   10.10    3.70
   6  -1  -2   19.30    5.60
   6  -1  -2    2.30    4.60
  -6  -1   2    7.70    3.40
  -6  -1   2   11.70    4.70
  -6   1   2   11.00    3.90
  -6   1   2    6.00    7.00
  -6   1   2    7.40    3.50
   6   1  -2    6.70    5.00
   6   1  -2   -3.20    3.10
  -5  -1   2  641.64   67.19
  -5  -1   2  656.83   66.99
   5  -1  -2  636.94   67.09
  -5  -1   2  583.14   66.79
   5  -1  -2  610.64   67.49
   5   1  -2  578.84   66.79
  -5   1   2  637.64   66.99
  -5   1   2  611.94   67.79
   5   1  -2  668.63   67.19
  -5   1   2  663.23   66.99
   4  -1  -2   71.79    8.70
   4  -1  -2   69.69    9.40
  -4  -1   2   76.79    8.80
  -4  -1   2   61.09    8.80
  -4   1   2   70.29   10.20
  -4   1   2   63.19    8.50
  -4   1   2   66.59    8.50
   4   1  -2   79.99    9.00
   3  -1  -2  470.55   50.59
  -3  -1   2  470.05   50.69
   3  -1  -2  477.05   51.09
   3   1  -2  495.95   50.79
  -3   1   2  474.75   50.59
  -3   1   2  462.05   51.29
   3   1  -2  471.55   50.79
  -3   1   2  469.65   50.69
   2  -1  -2  614.54   64.89
  -2  -1   2  516.75   64.79
   2  -1  -2  649.74   65.39
  -2  -1   2  549.85   64.79
  -2  -1   2  624.04   64.99
   2  -1  -2  657.13   65.29
   2   1  -2  665.43   65.09
  -2   1   2  604.54   64.99
  -2   1   2  589.24   64.89
   2   1  -2  615.14   65.19
  -2   1   2  649.04   65.39
  -2   1   2  613.94   64.89
   1  -1  -2  968.40   97.89
   1  -1  -2  974.00   97.79
   1  -1  -2  850.61   97.49
  -1  -1   2  846.92   97.49
   1  -1  -2  904.31   97.59
   1  -1  -2  925.61   97.39
  -1  -1   2  931.51   97.49
  -1  -1   2  935.51   97.49
   1  -1  -2  896.51   97.39
   1   1  -2  937.61   97.49
  -1   1   2  876.71   97.39
  -1   1   2  930.81   97.69
  -1   1   2  892.01   97.49
   1   1  -2  961.40   97.69
  -1   1   2  859.71   97.39
   1   1  -2  990.20   97.49
   0  -1   2  329.47   34.50
   0  -1   2  310.97   34.50
   0  -1  -2  296.27   34.30
   0  -1  -2  313.97   34.40
   0  -1   2  309.77   34.60
   0  -1  -2  329.37   34.80
   0  -1  -2  361.46   34.70
   0   1   2  304.57   34.30
   0   1  -2  323.57   34.50
   0   1  -2  329.17   34.50
   0   1  -2  319.57   34.80
   0   1  -2  334.67   34.60
   1  -1   2    0.50    2.50
   1  -1   2    3.60    3.20
  -1  -1  -2   -0.70    3.60
  -1   1  -2    0.30    2.60
  -1   1  -2    1.70    3.80
  -1   1  -2   -1.60    2.90
  -1   1  -2   -2.00    2.60
   1   1   2    2.30    1.10
   2  -1   2  514.15   54.69
  -2  -1  -2  436.46   54.89
   2  -1   2  549.25   54.99
  -2  -1  -2  544.15   54.59
  -2   1  -2  514.45   54.69
  -2   1  -2  476.05   55.09
   2   1   2  520.75   54.49
   2   1   2  533.55   54.59
  -2   1  -2  518.55   54.69
   3  -1   2   80.39   10.80
  -3  -1  -2   99.19   10.60
  -3  -1  -2  105.59   10.80
  -3  -1  -2  105.09   12.10
   3  -1   2   89.79   11.60
   3   1   2  116.09   10.60
  -3   1  -2   79.59   11.60
  -3   1  -2   83.69   10.70
  -3   1  -2   87.79   10.80
   3   1   2   79.69   10.40
  -4  -1  -2 1576.94  166.68
  -4  -1  -2 1571.94  166.28
   4  -1   2 1528.95  166.68
  -4  -1  -2 1703.63  166.28
   4   1   2 1448.46  166.28
   4   1   2 1566.14  166.18
  -4   1  -2 1552.64  166.18
  -4   1  -2 1618.74  166.28
  -4   1  -2 1516.55  166.68
  -5  -1  -2  342.17   42.90
  -5  -1  -2  418.36   42.50
  -5  -1  -2  407.96   42.70
   5  -1   2  378.46   43.10
  -5   1  -2  395.06   42.40
  -5   1  -2  387.36   43.30
  -5   1  -2  379.66   42.30
   5   1   2  431.66   42.70
   5   1   2  408.96   42.40
   6  -1   2   60.09    9.60
  -6  -1  -2   61.69    9.10
  -6  -1  -2   65.89    8.50
  -6  -1  -2   60.49    9.80
  -6   1  -2   64.79    8.30
  -6   1  -2   65.39    7.80
   6   1   2   73.79    9.60
  -6   1  -2   56.99    9.90
   6   1   2   68.39    8.50
  -7  -1  -2  580.34   64.49
  -7  -1  -2  627.84   63.99
   7  -1   2  603.04   64.79
  -7  -1  -2  608.04   64.79
  -7   1  -2  596.84   63.89
  -7   1  -2  585.14   63.69
   7   1   2  584.04   64.29
   7   1   2  616.24   63.99
  -7   1  -2  570.74   64.89
   8  -1   2  178.68   21.70
  -8  -1  -2  194.18   21.50
   8  -1   2  187.88   22.90
  -8  -1  -2  190.48   22.50
  -8   1  -2  198.58   21.20
  -8   1  -2  192.08   23.00
   8   1   2  176.38   21.80
  -8   1  -2  191.78   20.70
   8   1   2  173.48   21.40
   9  -1   2  448.66   49.99
  -9  -1  -2  473.95   49.80
  -9  -1  -2  441.46   50.59
   9  -1   2  460.95   50.79
  -9   1  -2  458.05   49.60
  -9   1  -2  450.85   50.99
   9   1   2  481.25   49.99
  -9   1  -2  456.15   49.30
   9   1   2  463.25   50.19
 -10  -1  -2   -3.60    5.70
  10  -1   2    0.30    6.90
  10  -1   2    2.10    6.50
  10   1   2   -3.00    6.40
 -10   1  -2    2.90    7.80
  10   1   2   -1.90    5.80
 -10   1  -2   -5.50    3.90
 -10   1  -2   10.70    4.90
  11  -1   2  200.58   23.10
  11  -1   2  156.88   21.70
 -11  -1  -2  178.88   21.60
 -11   1  -2  205.78   23.90
  11   1   2  180.58   21.90
  11   1   2  166.28   21.90
 -11   1  -2  170.98   20.20
 -11   1  -2  194.48   21.00
 -12  -1  -2   18.70    7.10
  12  -1   2   22.90    8.40
  12  -1   2   15.60    8.10
  12   1   2   16.30    7.30
  12   1   2   21.60    8.10
 -12   1  -2   21.10    6.10
 -12   1  -2   13.00    9.50
 -12   1  -2   10.70    4.60
  13  -1   2   20.10    8.80
 -13  -1  -2    9.90    7.40
  13  -1   2    8.20    7.80
  13   1   2   11.90    7.80
  13   1   2    8.70    8.50
 -13   1  -2   23.80    6.40
 -13   1  -2    6.30   10.10
 -13   1  -2   12.40    4.50
  14  -1   2  115.69   16.10
 -14  -1  -2  112.29   15.50
  14  -1   2  118.39   17.40
 -14   1  -2  111.09   14.90
  14   1   2  104.89   16.40
  14   1   2  105.49   16.20
 -14   1  -2  132.99   19.30
 -15  -1  -2    1.30    8.60
  15  -1   2   -0.10   10.00
  15  -1   2   14.00    9.20
  15   1   2    5.30   10.40
 -15   1  -2    4.80    7.30
  15   1   2   -5.30    8.40
 -15   1  -2    5.20   12.90
 -16  -1  -2  278.27   30.20
  16  -1   2  225.48   30.80
  16  -1   2  249.78   32.30
  16   1   2  257.67   31.40
 -16   1  -2  237.88   34.90
 -16   1  -2  226.48   29.50
  16   1   2  266.87   30.60
  17  -1   2   46.00   11.80
 -17  -1  -2   32.90   10.90
  17  -1   2   32.40   13.40
  17   1   2   17.90   12.10
  17   1   2   45.90   13.10
 -17   1  -2   20.90    9.90
 -17   1  -2   46.70   16.90
 -18  -1  -2   19.50   11.10
  18  -1   2   52.09   15.00
  18  -1   2   39.80   12.80
 -18   1  -2   36.40   19.70
  18   1   2   29.60   13.50
 -18   1  -2   27.50   10.80
  18   1   2   25.00   12.70
  19  -1   2  120.39   22.90
 -19  -1  -2  107.19   18.40
  19  -1   2  126.89   19.30
  19   1   2  125.69   20.40
 -19   1  -2  152.18   26.90
  19   1   2  125.29   22.00
 -19   1  -2  113.69   18.00
 -20  -1  -2   -1.80   11.50
  20  -1   2   -7.00   11.80
  20  -1   2    7.10   17.40
 -20   1  -2  -14.60   10.70
  20   1   2    8.00   16.00
  20   1   2   -0.40   12.80
  21  -1   2   30.40   15.80
  21  -1   2   49.90   20.80
 -21  -1  -2   44.10   13.80
 -21   1  -2   63.49   13.90
  21   1   2   47.60   18.60
  22  -1   2  130.19   25.70
 -22  -1  -2  190.88   25.40
  22  -1   2  238.78   32.00
  22   1   2  178.18   30.00
 -22   1  -2  188.58   25.20
  23  -1   2   19.60   15.30
 -23  -1  -2    5.60   14.00
  23  -1   2   28.20   19.10
 -23   1  -2   12.50   13.80
  23   1   2   50.99   19.10
  24  -1   2   29.20   22.40
  24  -1   2   58.29   18.80
 -24  -1  -2   53.89   15.70
  24   1   2   54.89   22.10
 -24   1  -2   43.70   16.00
  25  -1   2    9.20   18.90
 -25  -1  -2  -14.20   14.20
 -25   1  -2    4.30   15.60
  25   1   2   -6.70   20.50
 -25  -2   2   15.30   16.00
  25  -2  -2   11.00   19.30
  25  -2  -2    2.20   24.00
  25   2  -2  -19.60   22.50
 -25   2   2   18.50   17.60
  24  -2  -2   75.09   23.80
 -24  -2   2   69.49   18.00
  24  -2  -2   37.50   20.30
  24   2  -2   61.79   22.60
 -24   2   2   71.69   18.90
  23  -2  -2  -10.70   16.20
 -23  -2   2  -15.00   14.20
  23  -2  -2  -22.80   19.50
 -23   2   2    9.10   14.20
  23   2  -2   14.00   20.40
  22  -2  -2  -10.80   19.00
  22  -2  -2    0.60   16.10
 -22  -2   2  -19.80   13.60
  22   2  -2  -17.20   17.00
 -22   2   2   17.90   13.60
 -21  -2   2   37.40   14.50
  21  -2  -2   34.00   13.70
  21  -2  -2   26.90   20.30
 -21   2   2   23.10   13.10
  21   2  -2   21.20   17.40
 -20  -2   2    4.10   12.40
  20  -2  -2   14.90   16.60
  20  -2  -2    8.30   12.20
  20   2  -2    4.30   16.90
 -20   2   2    8.60   11.50
  19  -2  -2   15.00   18.30
 -19  -2   2   -3.20   11.60
  19  -2  -2   -6.00   11.30
 -19   2   2   -3.60   11.00
  19   2  -2   13.00   14.50
 -19   2   2   23.90   11.10
 -18  -2   2   92.19   16.50
  18  -2  -2  110.49   20.30
  18  -2  -2   59.09   15.90
  18   2  -2  115.89   18.90
 -18   2   2  108.99   15.50
 -18   2   2   67.99   23.10
 -18   2   2  106.89   14.10
  17  -2  -2  212.28   27.10
  17  -2  -2  175.68   29.40
 -17  -2   2  191.98   26.30
  17   2  -2  222.68   27.80
 -17   2   2  219.78   32.00
 -17   2   2  230.98   26.50
 -17   2   2  218.38   25.50
 -16  -2   2   -8.60    9.50
  16  -2  -2    7.70   10.00
  16  -2  -2    1.30   11.90
 -16   2   2   -1.40   15.00
 -16   2   2    7.00    7.80
  16   2  -2   -6.70    9.40
  16   2  -2    4.70   11.70
 -16   2   2    0.60    7.80
  15  -2  -2   -2.40    9.10
  15  -2  -2    2.70   11.30
 -15  -2   2   -6.90    8.80
  15   2  -2  -13.70   10.40
 -15   2   2    2.00    7.20
  15   2  -2  -13.30    7.50
 -15   2   2   -2.20   13.40
 -15   2   2    3.60    7.40
 -14  -2   2    4.20    8.70
  14  -2  -2    6.40   10.50
  14  -2  -2   -3.00    8.30
 -14   2   2    1.50    6.60
 -14   2   2    9.20    7.10
 -14   2   2    4.40   12.80
  14   2  -2    4.80    9.70
  14   2  -2  -13.70    6.70
  13  -2  -2   39.60   11.40
 -13  -2   2   36.30    9.70
  13  -2  -2   53.89   10.10
 -13   2   2   62.39    8.70
 -13   2   2   50.39   14.00
  13   2  -2   23.40    8.00
  13   2  -2   54.19   11.40
 -13   2   2   48.90    8.40
 -12  -2   2   -8.30    7.30
  12  -2  -2    5.50    7.30
  12  -2  -2    9.40    9.30
 -12   2   2   -4.00    5.40
 -12   2   2    1.20    6.10
  12   2  -2   -7.90    8.30
  12   2  -2  -10.50    4.80
 -12   2   2    2.40   10.80
 -11  -2   2   72.19   11.10
 -11  -2   2   71.69    8.90
  11  -2  -2   76.09   11.00
  11  -2  -2   75.29   12.70
 -11   2   2   84.39   10.00
  11   2  -2   93.89   12.10
  11   2  -2   45.70    9.20
 -11   2   2   68.09    9.80
 -11   2   2   72.69   14.40
  10  -2  -2  604.44   68.79
 -10  -2   2  676.63   68.29
 -10  -2   2  672.03   69.09
  10  -2  -2  645.94   69.89
  10   2  -2  633.74   68.89
 -10   2   2  635.94   68.59
 -10   2   2  648.14   70.59
 -10   2   2  650.13   68.69
  10   2  -2  585.34   68.29
  -9  -2   2   67.89    9.90
   9  -2  -2   75.59    9.70
  -9  -2   2   61.79    8.10
   9  -2  -2   63.79   11.20
   9   2  -2   64.09   10.30
  -9   2   2   47.50   12.00
   9   2  -2   49.70    7.80
  -9   2   2   68.69    8.70
  -9   2   2   52.99    8.70
   8  -2  -2   18.60    7.80
  -8  -2   2    3.60    6.20
   8  -2  -2    2.40    5.90
  -8  -2   2    7.50    4.50
  -8   2   2    7.30    5.20
  -8   2   2   -3.90    4.50
   8   2  -2    1.40    6.70
   8   2  -2    1.00    3.40
  -8   2   2   -3.80    7.60
   7  -2  -2   27.70    7.50
  -7  -2   2   11.50    4.60
  -7  -2   2   10.00    5.80
   7  -2  -2   17.50    5.70
  -7   2   2   18.20    5.10
  -7   2   2   13.70    4.60
   7   2  -2    7.50    4.50
   7   2  -2    6.70    6.60
  -7   2   2   10.80    7.50
   6  -2  -2   88.19   11.00
   6  -2  -2  108.79   13.40
  -6  -2   2   85.89   10.90
  -6   2   2   91.29   11.30
  -6   2   2   97.59   13.00
  -6   2   2   96.59   10.80
   6   2  -2   61.49    9.90
   6   2  -2   79.99   11.70
   6   2  -2  110.39   11.40
  -5  -2   2   17.60    5.00
   5  -2  -2   16.60    7.10
   5  -2  -2   25.90    5.50
   5   2  -2   26.50    6.10
   5   2  -2   28.60    6.10
   5   2  -2   31.40    3.90
  -5   2   2   27.40    4.90
  -5   2   2   26.70    7.90
  -5   2   2   23.70    5.20
   4  -2  -2 1019.90  112.69
   4  -2  -2 1036.20  112.09
  -4  -2   2 1081.19  112.19
   4   2  -2 1097.79  112.19
   4   2  -2 1017.40  112.29
  -4   2   2 1035.10  112.09
  -4   2   2 1083.49  112.89
  -4   2   2 1052.89  112.19
   3  -2  -2  256.67   30.10
  -3  -2   2  290.57   29.40
  -3  -2   2  273.77   28.80
  -3  -2   2  260.27   28.90
  -3   2   2  257.47   30.20
   3   2  -2  238.18   28.80
  -3   2   2  260.17   29.50
   3   2  -2  289.97   29.80
   3   2  -2  302.57   29.40
  -3   2   2  276.47   29.10
   2  -2  -2  768.22   76.19
   2  -2  -2  721.33   75.89
  -2  -2   2  717.63   75.49
  -2  -2   2  672.63   75.29
   2   2  -2  663.73   75.59
   2   2  -2  676.63   75.19
  -2   2   2  717.13   75.79
  -2   2   2  677.13   75.29
   2   2  -2  752.72   75.39
  -2   2   2  706.33   75.49
   1  -2  -2   50.49    8.50
   1  -2  -2   45.40    7.40
  -1  -2   2   45.20    6.70
  -1  -2   2   51.09    6.60
  -1   2   2   37.10    7.00
  -1   2   2   49.50    6.60
  -1   2   2   34.70    6.10
   1   2  -2   46.90    7.50
   1   2  -2   55.59    7.10
   0  -2  -2  155.58   18.30
   0  -2   2  167.48   17.60
   0  -2  -2  143.79   16.60
   0  -2   2  154.58   17.50
   0  -2  -2  171.28   18.10
   0   2  -2  145.39   17.30
   0   2   2  144.79   17.30
   0   2  -2  140.69   18.00
   0   2   2  154.88   17.30
  -1  -2  -2    2.30    3.00
  -1  -2  -2    7.60    4.90
  -1  -2  -2   12.30    2.40
   1  -2   2    7.00    4.60
   1  -2   2   -0.10    3.80
  -1  -2  -2   10.30    5.90
   1   2   2    8.10    3.30
   1   2   2   15.10    2.50
  -1   2  -2   -0.10    5.00
  -1   2  -2    8.90    4.10
  -1   2  -2    5.70    4.10
  -2  -2  -2   63.49    8.50
   2  -2   2   76.69    9.60
  -2  -2  -2   72.29    8.10
   2  -2   2   84.99   10.30
  -2  -2  -2   67.19    9.90
  -2   2  -2   90.59    9.50
   2   2   2   59.99    8.30
  -2   2  -2   84.09   10.40
  -2   2  -2   82.49    9.50
  -3  -2  -2   31.90    5.40
   3  -2   2   33.30    7.00
  -3  -2  -2   36.80    6.90
   3   2   2   47.40    5.20
  -3   2  -2   31.90    7.20
  -3   2  -2   39.20    6.10
  -3   2  -2   36.50    6.10
  -4  -2  -2  123.89   13.90
   4  -2   2  102.49   13.90
  -4   2  -2  112.99   14.50
  -4   2  -2  104.99   12.60
   4   2   2   94.59   11.70
   4   2   2  116.59   12.10
  -4   2  -2   92.49   12.80
   5  -2   2  283.47   30.70
  -5  -2  -2  263.27   30.30
  -5   2  -2  288.87   31.10
   5   2   2  291.67   29.40
  -5   2  -2  292.47   29.70
  -5   2  -2  267.27   29.80
   5   2   2  235.98   29.30
   6  -2   2   34.70    7.80
  -6  -2  -2   27.80    6.10
  -6  -2  -2   24.80    7.60
   6   2   2   41.40    5.70
  -6   2  -2   29.10    5.80
  -6   2  -2   26.80    8.40
  -6   2  -2   31.60    5.60
  -7  -2  -2  497.35   51.39
   7  -2   2  474.35   52.39
  -7  -2  -2  430.06   51.89
  -7   2  -2  466.45   51.19
   7   2   2  505.25   51.19
   7   2   2  488.05   51.59
  -7   2  -2  480.15   51.29
  -7   2  -2  464.25   52.29
   8  -2   2  568.54   61.09
  -8  -2  -2  569.24   59.99
  -8  -2  -2  507.55   60.39
   8   2   2  559.44   60.09
  -8   2  -2  538.75   59.79
   8   2   2  572.24   59.79
  -8   2  -2  565.64   61.29
  -8   2  -2  568.74   59.69
  -9  -2  -2   25.50    7.10
   9  -2   2   27.10    8.60
  -9  -2  -2   20.70    7.70
   9   2   2   31.10    6.90
   9   2   2   32.60    7.00
  -9   2  -2   29.50    5.90
  -9   2  -2   30.50    5.80
  -9   2  -2   15.10    9.00
  10  -2   2  400.96   44.50
 -10  -2  -2  404.76   44.50
  10  -2   2  380.96   45.70
 -10   2  -2  404.26   44.10
 -10   2  -2  408.76   43.80
  10   2   2  403.66   44.30
 -10   2  -2  385.36   45.90
  10   2   2  432.06   44.60
  11  -2   2   14.00    8.50
 -11  -2  -2   10.70    7.30
  11  -2   2   16.60    7.50
  11   2   2   18.90    6.90
 -11   2  -2   12.70    9.50
  11   2   2   33.90    7.90
 -11   2  -2   17.20    5.70
 -11   2  -2   16.00    5.20
  12  -2   2  101.29   14.20
 -12  -2  -2   76.09   13.70
  12  -2   2  109.39   16.00
 -12   2  -2   99.49   13.00
  12   2   2   89.49   13.60
 -12   2  -2  108.09   12.40
 -12   2  -2  114.89   17.10
  12   2   2   86.79   14.10
  13  -2   2  135.09   16.70
  13  -2   2  118.59   18.00
 -13  -2  -2  115.89   15.80
 -13   2  -2  111.99   15.00
  13   2   2  126.29   16.60
 -13   2  -2  110.69   18.90
  13   2   2  102.79   16.00
 -13   2  -2  124.89   15.00
 -14  -2  -2  282.77   31.40
  14  -2   2  239.28   31.60
  14  -2   2  257.47   33.70
 -14   2  -2  282.37   29.80
 -14   2  -2  249.38   30.50
  14   2   2  261.57   31.80
 -14   2  -2  286.97   35.30
  14   2   2  264.27   31.70
 -15  -2  -2  102.39   14.10
  15  -2   2   95.09   16.50
  15  -2   2  101.79   14.80
  15   2   2   67.99   14.40
  15   2   2   68.19   15.40
 -15   2  -2   70.99   12.50
 -15   2  -2   86.79   11.70
 -15   2  -2   96.49   19.00
  16  -2   2  225.98   28.20
 -16  -2  -2  176.58   23.40
  16  -2   2  146.99   23.40
 -16   2  -2  180.58   28.20
 -16   2  -2  198.28   23.90
  16   2   2  183.38   25.40
  16   2   2  242.28   25.20
 -16   2  -2  173.28   24.20
 -17  -2  -2  121.99   19.10
  17  -2   2  146.59   20.10
  17  -2   2  155.88   23.20
  17   2   2  129.59   21.10
 -17   2  -2  165.78   26.80
 -17   2  -2  122.19   18.30
  17   2   2  147.49   21.60
 -18  -2  -2   31.20   11.80
  18  -2   2   28.90   16.50
  18  -2   2   23.80   11.70
 -18   2  -2   37.90   10.60
  18   2   2    7.10   13.30
 -18   2  -2   33.00   19.40
 -19  -2  -2   46.60   13.60
  19  -2   2   58.29   19.90
  19  -2   2   41.50   14.70
 -19   2  -2   42.80   12.60
 -19   2  -2   79.49   23.80
  19   2   2   54.79   17.70
 -20  -2  -2    6.60   12.20
  20  -2   2   12.10   11.70
  20  -2   2   -7.10   18.30
 -20   2  -2    7.00   11.00
  20   2   2   -2.70   17.20
 -20   2  -2    8.80   21.80
  21  -2   2   33.60   14.50
  21  -2   2    6.70   20.30
 -21  -2  -2   24.10   13.40
  21   2   2   56.19   18.30
 -21   2  -2   31.60   13.20
 -21   2  -2   63.29   28.00
 -22  -2  -2   10.20   13.70
  22  -2   2    9.20   21.40
  22  -2   2   18.00   14.60
 -22   2  -2   12.40   14.30
  22   2   2   29.70   19.70
 -22   2  -2   48.00   26.50
 -23  -2  -2   22.40   14.70
  23  -2   2   18.20   15.50
  23  -2   2   19.40   23.00
  23   2   2   27.40   21.50
 -23   2  -2   30.20   15.50
  24  -2   2   10.00   18.20
 -24  -2  -2   29.90   15.10
  24  -2   2  -19.10   22.50
 -24   2  -2   -1.10   15.30
  24   2   2   41.40   21.40
 -25  -3   2   24.90   16.40
  25  -3  -2   -7.30   25.60
 -25   3   2  -13.20   19.30
  25   3  -2   14.10   22.40
 -24  -3   2   53.59   16.60
  24  -3  -2  -16.60   22.20
 -24   3   2   19.60   16.90
  24   3  -2   18.50   24.00
  23  -3  -2  -42.50   21.00
  23  -3  -2  -13.00   16.90
 -23  -3   2    5.70   15.10
 -23   3   2    6.20   14.90
  23   3  -2    6.90   20.70
 -22  -3   2  140.99   22.80
  22  -3  -2   81.39   24.70
  22  -3  -2  177.38   32.20
  22   3  -2  154.98   26.90
 -22   3   2  187.98   23.30
  21  -3  -2   -6.70   19.40
 -21  -3   2   14.70   14.20
  21  -3  -2  -12.50   15.00
  21   3  -2   -6.90   18.50
 -21   3   2   20.30   13.40
 -20  -3   2   83.79   17.60
  20  -3  -2   71.59   19.30
  20  -3  -2   88.59   24.80
  20   3  -2  101.69   21.90
 -20   3   2  153.08   29.80
 -20   3   2   90.49   16.70
  19  -3  -2    0.10   17.40
  19  -3  -2   -9.20   13.30
 -19  -3   2   29.00   13.00
 -19   3   2    1.90   10.70
  19   3  -2    5.30   16.60
 -19   3   2   31.10   23.00
 -19   3   2   12.20   10.80
  18  -3  -2   41.50   13.30
 -18  -3   2   53.49   14.20
  18  -3  -2   48.50   18.50
 -18   3   2   58.59   12.50
 -18   3   2   32.00   21.00
 -18   3   2   65.59   12.20
  18   3  -2   59.89   17.30
  17  -3  -2   42.20   12.10
 -17  -3   2   33.50   12.90
  17  -3  -2   35.10   18.30
 -17   3   2   51.19   11.20
 -17   3   2   46.90   11.30
  17   3  -2   38.70   15.50
 -17   3   2   53.69   18.30
 -16  -3   2   12.60   11.70
  16  -3  -2   21.60   10.70
  16  -3  -2   25.40   14.90
 -16   3   2   21.90    9.30
 -16   3   2   16.20   16.50
 -16   3   2   35.80    9.70
  16   3  -2   34.00   13.40
 -15  -3   2  164.38   23.70
  15  -3  -2  190.18   26.30
  15  -3  -2  198.48   24.10
 -15   3   2  172.98   27.90
 -15   3   2  176.98   22.90
 -15   3   2  210.58   23.60
  15   3  -2  198.18   25.50
  14  -3  -2  -12.00   11.40
  14  -3  -2   -1.60    8.90
 -14  -3   2   -3.10    9.70
 -14   3   2    3.20    7.30
 -14   3   2    7.10    7.60
 -14   3   2   -3.10   13.40
  14   3  -2   -0.90   10.50
  13  -3  -2  341.77   39.20
  13  -3  -2  337.67   41.50
 -13  -3   2  322.57   39.50
  13   3  -2  371.26   39.80
 -13   3   2  365.26   43.10
 -13   3   2  352.56   38.80
  13   3  -2  327.97   38.30
 -13   3   2  370.26   38.90
  12  -3  -2    1.90    7.90
  12  -3  -2    3.10    9.80
 -12   3   2    1.30    5.90
 -12   3   2    3.70   11.10
 -12   3   2   11.80    6.80
  12   3  -2    5.10    9.20
  12   3  -2  -10.80    5.00
  11  -3  -2  122.89   15.20
  11  -3  -2   94.29   16.70
  11   3  -2  100.39   13.40
  11   3  -2  123.99   16.00
 -11   3   2  134.59   14.80
 -11   3   2  115.09   14.50
 -11   3   2  123.09   18.20
  10  -3  -2  325.97   38.50
  10  -3  -2  326.87   36.60
 -10   3   2  316.17   38.60
  10   3  -2  310.67   37.10
 -10   3   2  353.06   36.40
  10   3  -2  309.07   37.10
 -10   3   2  352.26   36.70
  -9  -3   2   25.50    6.00
   9  -3  -2   23.90    9.80
   9  -3  -2   31.30    8.00
  -9   3   2   25.40    6.40
  -9   3   2   24.20   10.40
   9   3  -2   30.70    8.10
  -9   3   2   34.00    7.20
   9   3  -2   28.90    8.90
  -8  -3   2 1535.25  156.08
   8  -3  -2 1496.55  156.38
   8  -3  -2 1438.16  157.28
  -8   3   2 1445.26  156.38
   8   3  -2 1402.46  156.38
  -8   3   2 1494.55  157.68
  -8   3   2 1472.25  156.28
   8   3  -2 1440.36  156.48
  -7  -3   2  129.79   15.70
   7  -3  -2  159.98   19.70
   7  -3  -2  125.29   15.90
  -7   3   2  116.09   16.30
  -7   3   2  127.09   18.10
   7   3  -2  111.59   16.70
   7   3  -2  137.89   16.00
  -7   3   2  132.49   15.60
   6  -3  -2  714.13   77.39
   6  -3  -2  783.52   78.69
  -6  -3   2  706.03   77.39
  -6   3   2  709.63   77.59
   6   3  -2  732.53   77.79
  -6   3   2  725.93   77.39
   6   3  -2  711.33   77.39
  -6   3   2  697.43   78.69
  -5  -3   2  120.99   13.70
   5  -3  -2  156.68   17.30
  -5  -3   2   82.89   11.90
  -5   3   2  112.09   15.20
   5   3  -2  136.79   13.70
  -5   3   2  117.89   13.20
   5   3  -2  100.69   14.20
  -5   3   2  113.19   14.10
   4  -3  -2   15.60    7.60
  -4  -3   2   -5.30    3.50
  -4  -3   2    0.00    4.90
  -4  -3   2   -9.00    3.80
   4   3  -2   -5.20    5.10
   4   3  -2   -3.80    4.60
  -4   3   2   -1.80    6.60
   4   3  -2    6.70    5.90
  -4   3   2    2.80    5.20
  -4   3   2    1.00    4.20
   3  -3  -2  225.98   25.20
  -3  -3   2  219.88   23.70
  -3  -3   2  210.08   23.60
  -3  -3   2  220.28   24.00
  -3   3   2  188.38   24.10
  -3   3   2  194.18   23.50
   3   3  -2  211.68   24.40
   3   3  -2  229.18   23.70
  -3   3   2  198.08   25.00
   2  -3  -2  635.34   65.49
  -2  -3   2  606.14   64.79
   2  -3  -2  611.24   65.69
  -2  -3   2  588.34   64.69
  -2   3   2  575.94   64.89
   2   3  -2  620.44   64.69
  -2   3   2  606.54   65.29
  -2   3   2  610.14   64.59
   2   3  -2  573.24   65.19
  -1  -3   2  327.67   37.00
   1  -3  -2  357.66   38.40
   1  -3  -2  357.86   37.60
  -1   3   2  312.37   37.00
   1   3  -2  328.37   37.50
  -1   3   2  335.27   37.20
  -1   3   2  329.97   36.60
   1   3  -2  353.06   36.80
   0  -3  -2  617.64   63.79
   0  -3   2  613.64   63.49
   0  -3  -2  623.64   64.09
   0   3   2  609.34   63.29
   0   3   2  603.04   63.09
   0   3  -2  511.05   63.59
   0   3   2  535.05   63.29
   0   3  -2  597.54   63.39
   1  -3   2   18.40    6.10
  -1  -3  -2   11.60    6.30
  -1  -3  -2   10.00    7.40
  -1   3  -2   12.20    5.30
  -1   3  -2    5.20    6.40
   1   3   2   14.50    5.10
  -1   3  -2    4.50    5.20
   1   3   2   13.10    4.60
  -2  -3  -2  107.19   12.30
   2  -3   2   92.59   12.20
  -2  -3  -2  100.99   13.70
   2   3   2   84.89   10.50
  -2   3  -2   87.39   11.50
  -2   3  -2   87.39   11.50
   2   3   2   73.49   11.10
  -2   3  -2   91.79   12.50
  -3  -3  -2   55.89   11.60
   3  -3   2  103.19   13.10
  -3  -3  -2   83.19   11.70
  -3   3  -2  110.69   11.30
  -3   3  -2   81.69   12.70
   3   3   2   96.69   10.10
   3   3   2   65.69   10.20
  -3   3  -2   92.99   11.20
  -4  -3  -2  226.58   25.10
   4  -3   2  243.88   25.80
   4   3   2  235.78   23.60
   4   3   2  188.68   23.60
  -4   3  -2  192.98   24.80
  -4   3  -2  236.78   24.50
  -4   3  -2  204.28   26.00
  -5  -3  -2 1125.69  129.59
   5  -3   2 1247.38  130.19
  -5   3  -2 1184.38  129.49
  -5   3  -2 1269.27  130.49
   5   3   2 1222.28  129.09
  -5   3  -2 1250.17  129.49
   5   3   2 1204.68  128.99
   6  -3   2  453.85   48.80
  -6  -3  -2  417.56   48.00
   6   3   2  434.36   47.00
  -6   3  -2  443.96   48.70
  -6   3  -2  419.86   47.70
  -6   3  -2  455.15   47.60
   6   3   2  446.66   47.20
  -7  -3  -2  818.92   85.49
   7  -3   2  798.12   85.99
   7   3   2  789.22   84.79
  -7   3  -2  799.32   84.99
  -7   3  -2  780.32   85.09
   7   3   2  783.42   84.59
  -7   3  -2  776.42   86.29
   8  -3   2   24.00    8.60
  -8  -3  -2   19.90    7.90
  -8   3  -2   15.10    6.10
   8   3   2   25.90    5.50
  -8   3  -2   37.70    6.40
   8   3   2   30.00    6.60
  -8   3  -2   17.40    9.10
  -9  -3  -2   84.69   12.60
   9  -3   2   87.79   13.90
  -9   3  -2   75.09   14.30
  -9   3  -2   88.89   11.60
  -9   3  -2   90.89   11.50
   9   3   2   80.09   11.60
   9   3   2   94.99   11.90
  10  -3   2   45.80   10.90
 -10  -3  -2   44.00    9.40
 -10  -3  -2   53.89    9.00
  10   3   2   59.99    8.90
  10   3   2   64.69    9.70
 -10   3  -2   41.60   11.70
 -10   3  -2   41.30    8.30
 -10   3  -2   40.20    8.00
  11  -3   2   10.20    9.40
  11  -3   2   -3.90    7.40
 -11  -3  -2   -6.60    7.10
 -11  -3  -2    9.30    7.50
 -11   3  -2   15.40    6.00
 -11   3  -2   -3.10    5.40
 -11   3  -2   18.80   10.30
  11   3   2    3.70    6.40
  11   3   2    1.90    8.10
  12  -3   2  820.62   91.49
 -12  -3  -2  856.91   91.49
  12  -3   2  799.72   92.69
 -12   3  -2  879.01   93.59
 -12   3  -2  855.51   90.99
 -12   3  -2  854.41   91.29
  12   3   2  868.91   91.59
  12   3   2  851.61   91.69
  13  -3   2    4.70   10.30
  13  -3   2   -2.00    8.50
 -13  -3  -2    2.00    9.20
 -13   3  -2   15.40   11.30
  13   3   2    7.90    9.70
 -13   3  -2    4.40    6.40
  13   3   2    4.00    7.20
 -13   3  -2   16.20    6.70
  14  -3   2  297.87   35.00
 -14  -3  -2  301.37   35.10
  14  -3   2  277.87   37.30
  14   3   2  277.37   35.60
  14   3   2  284.07   35.20
 -14   3  -2  292.67   34.20
 -14   3  -2  356.96   39.90
 -14   3  -2  315.77   33.70
 -15  -3  -2   31.20   10.70
  15  -3   2   18.70   10.20
  15  -3   2   11.60   13.60
 -15   3  -2   -0.10   15.10
  15   3   2   15.40   11.50
  15   3   2    9.90   12.30
 -15   3  -2   12.00    8.30
 -15   3  -2   22.30    7.80
 -16  -3  -2    3.80   10.70
  16  -3   2  -18.40   13.10
  16  -3   2   -0.70   10.30
 -16   3  -2    8.90    7.90
 -16   3  -2    5.80    8.60
 -16   3  -2    0.80   17.50
  16   3   2   -6.60   12.90
  17  -3   2    8.50   11.60
  17  -3   2   16.60   16.40
 -17  -3  -2   14.30   11.80
  17   3   2   25.40   14.50
 -17   3  -2   24.30   10.30
 -17   3  -2   11.50   18.50
 -18  -3  -2   55.49   13.90
  18  -3   2   24.50   17.60
  18  -3   2   30.80   13.60
 -18   3  -2   69.99   24.20
 -18   3  -2   69.49   12.80
  18   3   2   62.99   16.50
  19  -3   2   37.60   14.00
  19  -3   2   37.60   19.40
 -19  -3  -2   59.29   14.50
  19   3   2   81.39   19.00
 -19   3  -2   66.69   14.20
 -19   3  -2   44.50   26.20
  20  -3   2   -5.90   12.30
 -20  -3  -2   -5.00   13.00
  20  -3   2  -17.30   18.50
  20   3   2    4.20   17.90
 -20   3  -2   11.70   11.80
 -20   3  -2   -8.80   25.10
 -21  -3  -2   12.00   13.90
  21  -3   2    3.40   14.10
  21  -3   2   25.40   22.00
  21   3   2   37.30   18.90
 -21   3  -2   50.89   27.60
 -21   3  -2   26.00   14.00
  22  -3   2  -24.80   20.50
 -22  -3  -2   10.30   14.20
  22  -3   2   -7.80   13.50
 -22   3  -2   -6.70   13.70
 -22   3  -2   23.40   32.20
  22   3   2   30.10   20.20
 -23  -3  -2   26.70   14.90
  23  -3   2   29.00   15.90
  23  -3   2  -44.60   18.50
 -23   3  -2   76.59   32.30
 -23   3  -2   -2.80   15.20
  23   3   2   13.30   20.10
  24  -3   2    4.40   15.80
 -24  -3  -2    6.60   15.20
 -24   3  -2   22.50   17.90
  24   3   2  -10.20   24.30
 -24   3  -2   70.99   32.60
  24  -4  -2   93.09   22.00
  24  -4  -2   20.30   27.60
 -24   4   2   70.79   24.40
  24   4  -2  127.49   28.40
  23  -4  -2   12.40   17.60
 -23   4   2   40.40   16.00
  23   4  -2   24.70   22.50
  22  -4  -2   -2.10   16.00
  22  -4  -2  -14.60   22.30
  22   4  -2   23.80   20.00
 -22   4   2   52.89   31.80
 -22   4   2    9.40   15.00
  21  -4  -2   91.39   19.30
  21  -4  -2   54.09   25.40
 -21   4   2   79.49   18.20
 -21   4   2  138.19   34.70
  21   4  -2  122.29   23.10
  20  -4  -2   -3.60   20.60
  20  -4  -2   33.70   14.50
  20   4  -2   73.39   20.00
 -20   4   2   34.60   14.40
 -20   4   2   25.80   27.30
 -20   4   2   41.70   14.50
  19  -4  -2   12.00   13.50
  19  -4  -2    6.40   19.40
  19   4  -2   37.40   18.80
 -19   4   2   12.60   13.40
 -19   4   2   38.60   13.10
 -19   4   2   51.69   26.60
  18  -4  -2   -8.10   18.10
  18  -4  -2   21.00   14.80
 -18   4   2   11.20   11.20
 -18   4   2   44.70   23.70
 -18   4   2    3.20   11.70
  18   4  -2   37.70   17.90
  17  -4  -2   42.60   15.70
  17  -4  -2   46.50   20.10
 -17   4   2   71.39   13.90
 -17   4   2   73.09   23.40
 -17   4   2   55.09   13.50
  17   4  -2   75.99   18.20
  16  -4  -2   -2.60   10.70
  16  -4  -2  -29.10   15.80
 -16   4   2   -9.40   16.30
  16   4  -2   11.80   15.00
 -16   4   2   -5.30    9.20
 -16   4   2   15.70   10.20
  15  -4  -2    0.00   14.30
  15  -4  -2    5.50   10.50
 -15   4   2   -9.40   15.60
 -15   4   2    0.70   10.00
  15   4  -2    5.40   14.00
 -15   4   2   19.10    9.20
  14  -4  -2   -6.20    9.70
  14  -4  -2   -0.40   13.60
  14   4  -2   -4.00   11.30
 -14   4   2   -2.50   15.10
 -14   4   2    5.20    8.80
  14   4  -2  -12.70   12.90
 -14   4   2    3.20    8.00
  13  -4  -2   -0.90   12.90
  13  -4  -2    2.70    9.00
  13   4  -2   11.10   12.00
 -13   4   2   -5.00   14.00
 -13   4   2    7.80    8.90
  13   4  -2    1.40   10.20
 -13   4   2   -9.30    7.10
  12  -4  -2   71.79   11.60
  12  -4  -2   41.30   14.40
 -12   4   2   61.09   10.10
 -12   4   2   45.10   10.80
 -12   4   2   38.60   15.80
  12   4  -2   63.49   13.10
  12   4  -2   56.49   12.10
  11  -4  -2   14.00    8.70
  11  -4  -2   -6.30   10.60
  11   4  -2    9.00    8.60
 -11   4   2    9.20    7.90
 -11   4   2   -0.30    6.30
  11   4  -2   -1.90    9.50
 -11   4   2    5.20   12.30
  10  -4  -2  186.08   27.80
  10  -4  -2  232.78   24.60
 -10   4   2  215.78   28.30
 -10   4   2  217.38   24.60
 -10   4   2  202.68   24.00
  10   4  -2  176.38   24.70
  10   4  -2  190.28   24.70
   9  -4  -2  119.59   20.60
   9  -4  -2  149.39   18.70
   9   4  -2  137.69   19.40
   9   4  -2  176.68   19.80
  -9   4   2  167.88   19.30
  -9   4   2  157.28   18.20
  -9   4   2  145.99   21.20
   8  -4  -2   61.69    9.40
   8  -4  -2   43.10   12.00
   8   4  -2   46.70    9.40
   8   4  -2   47.60    9.70
  -8   4   2   48.30    9.30
  -8   4   2   56.89    8.60
  -8   4   2   49.20   12.60
   7  -4  -2  713.43   79.19
   7   4  -2  698.33   77.79
  -7   4   2  720.13   77.49
  -7   4   2  731.53   79.09
   7   4  -2  736.53   77.49
  -7   4   2  723.83   77.79
   6  -4  -2   19.20   10.20
   6   4  -2   35.00    8.30
  -6   4   2   38.80    7.00
   6   4  -2   34.00    7.90
  -6   4   2   33.30   10.00
  -6   4   2   38.70    8.00
  -5  -4   2   85.69   12.70
  -5  -4   2   83.79   12.50
   5  -4  -2  119.89   15.90
   5   4  -2  103.29   13.70
  -5   4   2  101.39   13.30
  -5   4   2  106.99   15.30
   5   4  -2  113.79   13.00
  -5   4   2  113.79   12.80
   4  -4  -2  116.89   17.20
  -4  -4   2  119.19   15.30
  -4  -4   2  100.29   15.20
  -4   4   2  119.29   15.40
  -4   4   2  135.19   15.20
   4   4  -2  148.79   15.20
  -4   4   2  123.09   16.90
   4   4  -2  113.39   16.20
  -3  -4   2   23.60    7.30
  -3  -4   2   20.10    6.80
   3  -4  -2   22.90    9.60
   3   4  -2   22.70    7.70
   3   4  -2   29.20    6.70
  -3   4   2    5.80    7.90
  -3   4   2   22.60    6.20
  -3   4   2   10.40    6.80
   2  -4  -2   69.99   14.00
  -2  -4   2   49.40    9.10
   2  -4  -2   49.60   11.20
   2   4  -2   56.49   10.10
   2   4  -2   54.89    9.00
  -2   4   2   43.90    9.00
  -2   4   2   45.50    9.90
  -2   4   2   65.39    8.70
   1  -4  -2  495.55   55.29
   1  -4  -2  492.55   54.49
  -1  -4   2  551.64   54.09
   1   4  -2  443.86   53.99
  -1   4   2  516.05   53.39
   1   4  -2  457.05   53.79
  -1   4   2  493.05   53.99
  -1   4   2  489.65   53.79
   0  -4  -2   27.20   10.60
   0  -4  -2   33.70    9.10
   0  -4   2   38.40    8.40
   0   4  -2   15.80    7.10
   0   4  -2   27.60    8.90
   0   4   2   22.60    6.40
   0   4   2   17.10    7.30
   0   4  -2   29.40    7.00
   0   4   2   22.80    7.00
  -1  -4  -2  372.26   42.30
  -1  -4  -2  368.86   42.70
   1  -4   2  415.26   42.40
  -1   4  -2  373.26   41.70
  -1   4  -2  383.56   41.50
   1   4   2  376.26   41.60
  -1   4  -2  380.96   42.30
   1   4   2  349.47   41.40
  -2  -4  -2   56.89   11.50
   2  -4   2   84.89   12.20
  -2  -4  -2   89.29   12.50
  -2   4  -2   72.29   10.80
   2   4   2   64.29   10.50
  -2   4  -2   69.39   12.10
  -2   4  -2   74.99   10.70
   2   4   2   64.49   10.00
  -3  -4  -2   94.09   13.90
   3  -4   2  134.29   16.20
  -3  -4  -2   95.59   13.50
   3   4   2   82.39   12.70
  -3   4  -2   97.69   12.80
  -3   4  -2   94.89   13.10
  -3   4  -2   86.39   14.50
   3   4   2   96.89   11.80
   4  -4   2  520.85   52.89
  -4  -4  -2  475.05   52.19
   4   4   2  441.26   51.09
  -4   4  -2  496.15   51.69
   4   4   2  492.75   50.89
  -4   4  -2  450.35   51.79
  -4   4  -2  451.65   52.89
  -5  -4  -2  122.79   16.90
   5  -4   2  136.59   18.60
   5   4   2  107.69   15.00
  -5   4  -2  118.59   16.00
  -5   4  -2  133.79   18.20
  -5   4  -2  130.09   16.10
   5   4   2  155.18   15.00
   6  -4   2   22.00    9.10
  -6  -4  -2   20.40    8.10
   6   4   2   40.80    6.00
  -6   4  -2   26.80    7.70
  -6   4  -2   32.60    6.90
  -6   4  -2   37.60    9.30
   6   4   2   27.10    5.60
   7  -4   2   48.30   11.10
  -7  -4  -2   45.60    9.40
   7   4   2   52.59    7.20
  -7   4  -2   37.10   10.60
  -7   4  -2   52.89    8.60
   7   4   2   55.69    8.00
  -7   4  -2   43.30    9.00
  -8  -4  -2  112.29   15.50
   8  -4   2   96.39   16.40
   8   4   2  129.89   14.80
   8   4   2  103.39   13.80
  -8   4  -2   98.49   16.60
  -8   4  -2  134.59   15.20
  -8   4  -2  132.89   15.20
   9  -4   2   10.90    9.50
  -9  -4  -2    5.60    7.30
  -9   4  -2  -10.30    9.10
   9   4   2    9.50    5.20
   9   4   2   19.00    7.30
  -9   4  -2    1.50    6.40
  -9   4  -2    4.90    6.10
 -10  -4  -2  369.06   42.60
  10  -4   2  385.76   44.40
 -10   4  -2  366.16   41.80
  10   4   2  418.06   42.40
 -10   4  -2  393.76   45.00
  10   4   2  349.96   41.90
  10   4   2  385.76   41.90
 -10   4  -2  382.56   42.30
  11  -4   2  240.68   34.60
 -11  -4  -2  252.87   32.20
 -11   4  -2  299.57   35.70
  11   4   2  261.97   32.00
 -11   4  -2  292.57   31.60
 -11   4  -2  304.47   32.00
  11   4   2  305.97   32.60
 -12  -4  -2  237.98   31.50
  12  -4   2  273.67   31.70
  12  -4   2  281.27   34.90
 -12   4  -2  255.07   34.70
 -12   4  -2  303.07   31.50
  12   4   2  290.07   32.40
 -12   4  -2  264.37   31.20
  13  -4   2  240.78   34.40
  13  -4   2  257.17   31.10
 -13   4  -2  224.98   30.50
  13   4   2  284.97   32.60
 -13   4  -2  291.87   36.70
 -13   4  -2  278.17   30.70
  14  -4   2  -11.00   12.40
  14  -4   2   -1.20    9.90
 -14   4  -2    9.40   16.00
 -14   4  -2    9.10    8.30
  14   4   2   18.00   12.70
 -14   4  -2    2.90    7.70
  15  -4   2   13.70   11.20
  15  -4   2  -12.00   13.20
  15   4   2   -4.90   12.60
 -15   4  -2    0.40   17.30
 -15   4  -2   -9.10    7.90
 -15   4  -2    4.80    9.30
  16  -4   2   -6.60   14.90
  16  -4   2   -0.70   12.30
 -16   4  -2   24.70   19.90
 -16   4  -2    3.10    9.50
  16   4   2   11.60   14.80
 -16   4  -2   14.20   10.10
  17  -4   2    1.70   15.20
  17  -4   2   -1.00   12.10
 -17   4  -2    5.30   22.00
 -17   4  -2   -7.70   10.20
  17   4   2    4.60   15.10
 -17   4  -2   -2.60    9.90
  18  -4   2  -12.00   17.00
  18  -4   2   17.50   12.30
 -18   4  -2   -1.10   11.20
  18   4   2   -0.10   16.10
 -18   4  -2    8.50   22.30
  19  -4   2  -16.10   18.30
  19  -4   2   -7.30   12.70
  19   4   2   -6.70   18.40
 -19   4  -2   23.80   26.60
 -19   4  -2   -2.80   12.00
  20  -4   2  -17.50   18.80
  20  -4   2   13.10   14.10
 -20   4  -2   36.20   28.60
 -20   4  -2   27.00   14.30
  21  -4   2   19.30   15.00
  21  -4   2  -26.80   20.90
 -21   4  -2  -15.10   28.00
 -21   4  -2   -7.50   15.40
  22  -4   2   26.10   15.60
  22  -4   2   -0.60   23.90
 -22   4  -2  103.19   35.10
 -22   4  -2   41.20   15.60
  23  -4   2  -37.70   20.20
  23  -4   2   -9.10   16.80
 -23   4  -2   31.30   32.40
 -23   4  -2   12.50   18.50
  23  -5  -2   38.50   21.50
 -23   5   2  102.89   42.90
 -23   5   2   22.10   19.30
  22  -5  -2   33.60   19.20
  22  -5  -2  -10.80   21.10
 -22   5   2   53.19   38.70
 -22   5   2    6.20   16.00
  21  -5  -2  -36.70   23.00
  21  -5  -2  -14.30   16.50
 -21   5   2    7.00   15.50
 -21   5   2  -27.20   31.30
  20  -5  -2   -7.80   21.70
  20  -5  -2   10.80   17.10
 -20   5   2   -2.50   17.20
 -20   5   2   24.00   29.70
 -20   5   2    1.20   15.00
  19  -5  -2    6.20   19.50
 -19   5   2   36.80   15.10
 -19   5   2   45.80   15.30
 -19   5   2   28.80   28.80
  19   5  -2   82.09   21.10
  18  -5  -2   -8.30   16.80
  18  -5  -2   -8.20   18.90
  18   5  -2   -5.70   17.80
 -18   5   2   -6.00   13.30
 -18   5   2    9.50   13.10
 -18   5   2    2.40   24.50
  17  -5  -2   52.69   15.20
  17  -5  -2   63.59   22.40
 -17   5   2   53.79   14.70
 -17   5   2   75.89   15.50
  17   5  -2  102.09   19.80
 -17   5   2   60.19   22.90
  16  -5  -2  -10.70   18.10
  16  -5  -2   -3.20   12.20
 -16   5   2   23.00   21.80
 -16   5   2   -6.30   12.40
  16   5  -2    4.30   15.70
 -16   5   2   -3.00   10.70
  15  -5  -2   57.29   19.30
  15  -5  -2   33.20   13.00
  15   5  -2   70.89   16.50
 -15   5   2   41.60   14.10
 -15   5   2   42.00   21.70
 -15   5   2   34.90   11.90
  14  -5  -2   15.30   16.30
  14  -5  -2   19.40   12.60
  14   5  -2   29.60   14.10
 -14   5   2   30.70   10.70
 -14   5   2   25.70   19.70
 -14   5   2   33.80   12.10
  13  -5  -2  148.19   20.40
  13  -5  -2   83.59   22.50
  13   5  -2  148.29   20.10
 -13   5   2  145.49   19.90
 -13   5   2  136.79   18.70
 -13   5   2  143.09   26.40
  12  -5  -2  -14.00   13.50
  12  -5  -2   -8.90    9.80
  12   5  -2    9.70   11.20
 -12   5   2  -11.50   15.70
 -12   5   2    1.50    8.40
 -12   5   2   -5.90   10.10
  11  -5  -2  225.68   34.60
  11  -5  -2  264.37   30.80
 -11   5   2  252.97   31.20
  11   5  -2  245.28   30.40
 -11   5   2  287.67   36.40
  11   5  -2  263.57   31.00
 -11   5   2  249.08   30.00
  10  -5  -2   82.29   19.10
  10  -5  -2  114.09   15.90
 -10   5   2  120.69   16.40
  10   5  -2  119.09   16.40
 -10   5   2  114.49   15.30
  10   5  -2  118.09   16.60
 -10   5   2  101.89   20.20
   9  -5  -2   73.59   11.80
   9  -5  -2   42.00   15.00
   9   5  -2   68.69   11.90
   9   5  -2   70.09   11.80
  -9   5   2   54.49   10.70
  -9   5   2   73.09   15.60
  -9   5   2   53.89   11.50
   8  -5  -2  409.86   51.79
   8   5  -2  407.86   49.00
  -8   5   2  451.25   49.10
   8   5  -2  479.15   49.70
  -8   5   2  462.35   49.90
  -8   5   2  456.45   52.09
  -7  -5   2   43.30    7.90
   7  -5  -2   67.09   14.50
  -7   5   2   67.19   11.00
   7   5  -2   67.19   10.40
  -7   5   2   72.99   10.30
   7   5  -2   68.19   11.40
  -7   5   2   88.09   14.80
   6  -5  -2  213.78   29.80
  -6  -5   2  188.18   24.50
  -6   5   2  270.17   25.60
  -6   5   2  229.98   26.40
  -6   5   2  245.88   28.60
   6   5  -2  207.08   25.40
   6   5  -2  222.58   26.40
   5  -5  -2  470.95   55.09
  -5  -5   2  482.15   52.59
  -5  -5   2  462.45   52.49
   5   5  -2  465.55   53.39
   5   5  -2  478.95   52.69
  -5   5   2  484.85   52.79
  -5   5   2  534.75   54.89
  -5   5   2  502.55   53.39
  -4  -5   2  191.78   25.70
   4  -5  -2  249.28   28.70
  -4  -5   2  193.88   25.70
  -4   5   2  210.68   27.30
   4   5  -2  202.58   26.70
  -4   5   2  230.88   25.30
  -4   5   2  252.07   26.40
   4   5  -2  241.88   25.40
  -3  -5   2  620.74   68.49
  -3  -5   2  570.34   68.79
   3  -5  -2  593.34   69.69
   3  -5  -2  675.83   70.49
  -3   5   2  660.63   68.09
  -3   5   2  626.44   68.59
  -3   5   2  627.24   69.39
   3   5  -2  663.93   68.99
   3   5  -2  636.44   67.99
   2  -5  -2  332.37   40.70
  -2  -5   2  349.87   39.70
  -2  -5   2  358.46   40.40
   2  -5  -2  344.87   41.40
   2   5  -2  350.76   39.90
  -2   5   2  367.36   39.40
  -2   5   2  355.16   40.10
  -2   5   2  327.97   38.70
   2   5  -2  350.66   39.30
  -1  -5   2  158.58   22.20
   1  -5  -2  161.78   23.30
   1  -5  -2  167.88   23.60
   1   5  -2  168.68   21.30
   1   5  -2  185.28   20.80
  -1   5   2  162.28   21.70
  -1   5   2  170.58   20.70
   1   5  -2  185.68   22.60
  -1   5   2  154.78   21.30
   0  -5   2  128.49   17.50
   0  -5  -2  115.09   18.90
   0  -5  -2  104.49   17.80
   0   5  -2  129.79   16.20
   0   5   2  130.59   16.00
   0   5   2  134.19   18.00
   0   5   2  143.79   17.60
   0   5  -2  136.69   17.80
   0   5  -2  110.79   16.40
  -1  -5  -2    7.00   11.20
   1  -5   2   22.10    9.50
  -1  -5  -2   -1.10    9.20
   1   5   2   14.80    7.40
  -1   5  -2   14.30    7.20
   1   5   2   11.70    7.60
   1   5   2    4.20    6.50
  -1   5  -2    8.10    9.60
  -1   5  -2   10.40    7.30
  -2  -5  -2   26.00    9.90
   2  -5   2   33.80   10.40
  -2  -5  -2   49.10   11.20
  -2   5  -2   36.20    8.90
  -2   5  -2   22.00    8.40
  -2   5  -2   55.19   11.40
   2   5   2   24.10    8.50
   2   5   2   26.20    8.10
  -3  -5  -2    4.30    8.70
  -3  -5  -2    0.90    8.50
   3  -5   2   17.50    9.60
  -3   5  -2   -4.40    6.80
   3   5   2    3.70    7.30
   3   5   2    3.70    6.20
  -3   5  -2   10.50    9.60
  -3   5  -2    4.20    7.00
  -4  -5  -2   22.60    9.30
   4  -5   2   21.10   10.60
   4   5   2   20.40    6.80
  -4   5  -2   16.50    7.70
  -4   5  -2   20.80    8.00
  -4   5  -2   17.40   10.30
   4   5   2   39.30    6.30
  -5  -5  -2   40.10   10.10
   5  -5   2   45.10   12.20
  -5   5  -2   33.20    9.60
  -5   5  -2   49.20   12.50
  -5   5  -2   65.79    9.40
   5   5   2   55.39    8.00
   5   5   2   40.40    7.90
   6  -5   2   -5.60   10.10
  -6  -5  -2   13.50    8.30
  -6   5  -2    1.60    7.60
   6   5   2    8.20    5.30
   6   5   2   13.80    5.90
  -6   5  -2   10.60    7.00
  -6   5  -2    7.70   10.90
   7  -5   2  415.26   48.60
  -7  -5  -2  445.96   46.90
   7   5   2  411.46   46.00
  -7   5  -2  416.26   46.80
  -7   5  -2  444.36   49.10
   7   5   2  376.26   45.50
  -7   5  -2  430.76   46.30
   8  -5   2   -0.80   11.10
  -8  -5  -2    5.20    8.50
  -8   5  -2   -0.10    7.10
  -8   5  -2    7.90    8.20
   8   5   2   10.50    6.80
  -8   5  -2   10.60   11.60
   9  -5   2  602.44   72.99
  -9  -5  -2  669.03   71.09
  -9   5  -2  706.83   73.59
   9   5   2  602.74   70.19
  -9   5  -2  674.93   71.19
  -9   5  -2  658.03   70.69
 -10  -5  -2  200.38   27.10
  10  -5   2  178.28   28.10
 -10   5  -2  190.68   26.00
 -10   5  -2  243.88   30.30
  10   5   2  235.38   25.10
 -10   5  -2  220.18   25.80
  11  -5   2  324.37   41.40
  11   5   2  305.17   37.80
 -11   5  -2  303.87   37.80
 -11   5  -2  386.86   42.10
 -11   5  -2  346.77   38.10
  12  -5   2  223.98   33.60
 -12   5  -2  261.77   30.50
 -12   5  -2  265.47   31.50
  12   5   2  248.38   31.40
 -12   5  -2  304.17   36.70
  13  -5   2   29.30   15.40
  13  -5   2   23.60   11.70
 -13   5  -2   27.10    9.60
 -13   5  -2   11.80   11.00
 -13   5  -2   28.70   17.10
  14  -5   2   13.50   15.10
  14  -5   2   17.80   11.60
 -14   5  -2   35.50   10.10
 -14   5  -2    5.60   11.10
 -14   5  -2   15.30   19.70
  15  -5   2  171.08   23.10
  15  -5   2  111.09   26.80
 -15   5  -2  154.28   21.60
 -15   5  -2  169.88   28.20
 -15   5  -2  182.98   22.10
  16  -5   2    6.40   16.10
  16  -5   2  -18.10   17.10
 -16   5  -2    7.30   23.10
 -16   5  -2    1.50   11.70
 -16   5  -2   -0.10    9.90
  17  -5   2   38.10   19.50
  17  -5   2   83.39   17.00
 -17   5  -2   55.79   14.80
 -17   5  -2  112.99   16.50
 -17   5  -2   74.69   28.30
  18  -5   2   92.39   26.00
  18  -5   2   68.19   18.70
 -18   5  -2  135.59   32.10
 -18   5  -2  125.89   19.00
  19  -5   2  135.49   23.00
  19  -5   2   88.19   27.20
 -19   5  -2  210.48   39.20
 -19   5  -2  141.79   23.10
  20  -5   2   17.00   24.00
  20  -5   2   21.80   16.30
 -20   5  -2   45.30   18.80
 -20   5  -2   -0.20   31.10
  21  -5   2  -12.50   20.10
  21  -5   2   13.90   16.70
 -21   5  -2   50.39   33.50
 -21   5  -2   38.40   16.00
  22  -5   2   -7.70   15.60
 -22   5  -2   11.40   20.60
 -22   5  -2   41.90   37.80
  21  -6  -2   33.90   18.90
  21  -6  -2   30.80   28.20
 -21   6   2  119.19   42.10
 -21   6   2   29.20   19.70
  20  -6  -2   10.00   17.60
  20  -6  -2   -5.30   26.80
 -20   6   2   55.09   36.80
 -20   6   2   16.20   20.30
 -20   6   2   14.80   19.80
  19  -6  -2  -10.60   17.60
  19  -6  -2  -24.90   21.10
 -19   6   2   -1.50   16.40
 -19   6   2   -9.60   31.90
 -19   6   2   -6.60   16.80
  18  -6  -2   -8.30   16.20
  18  -6  -2   -3.00   19.20
 -18   6   2   30.90   31.90
 -18   6   2  -11.30   15.60
 -18   6   2   -1.60   15.90
  17  -6  -2  -24.10   18.20
 -17   6   2   19.50   28.00
 -17   6   2   -2.00   14.50
 -17   6   2    8.70   17.80
  16  -6  -2   49.10   21.30
 -16   6   2  132.39   31.20
 -16   6   2   67.59   19.10
 -16   6   2  114.29   19.80
  15  -6  -2  -31.00   16.90
  15  -6  -2   12.80   12.60
 -15   6   2   34.30   25.20
 -15   6   2    8.90   15.20
 -15   6   2    8.10   12.90
  14  -6  -2  168.98   35.80
  14  -6  -2  278.07   31.70
 -14   6   2  233.38   32.70
 -14   6   2  296.97   33.50
 -14   6   2  297.07   41.50
  13  -6  -2   75.59   22.10
  13  -6  -2   51.69   16.50
 -13   6   2   87.99   24.90
 -13   6   2   77.19   16.50
 -13   6   2   58.19   14.70
  13   6  -2   79.59   16.40
  12  -6  -2  121.89   28.60
  12  -6  -2  205.28   25.60
 -12   6   2  166.48   31.20
  12   6  -2  188.58   24.40
 -12   6   2  198.48   24.70
 -12   6   2  223.38   26.00
  11  -6  -2   -5.50   16.30
  11  -6  -2   29.30   11.20
 -11   6   2   26.50   10.70
 -11   6   2   11.80   12.90
  11   6  -2   42.60   12.00
 -11   6   2   41.00   19.20
  10  -6  -2    3.10   15.80
  10  -6  -2   10.20   10.90
 -10   6   2   -1.00   11.10
 -10   6   2    4.80    9.60
  10   6  -2    2.40   10.10
 -10   6   2  -19.70   16.10
   9  -6  -2  188.88   24.60
   9  -6  -2  187.88   28.80
  -9   6   2  202.88   24.40
   9   6  -2  184.98   23.70
  -9   6   2  192.68   25.50
  -9   6   2  196.68   29.30
   8  -6  -2   34.20   16.70
   8   6  -2   49.50   11.80
  -8   6   2   28.00   10.30
  -8   6   2   56.09   13.20
   8   6  -2   44.90   10.90
  -8   6   2   41.70   16.70
   7  -6  -2    4.20   14.50
  -7   6   2   17.10    8.50
  -7   6   2   12.50   14.20
   7   6  -2   13.20    9.20
   7   6  -2   12.80   10.10
  -7   6   2   -6.40   10.00
   6  -6  -2   21.30   15.40
  -6   6   2   42.10   14.50
  -6   6   2   25.90   11.30
   6   6  -2   26.80   10.60
  -6   6   2   41.70   10.50
   6   6  -2   33.10    9.80
   5  -6  -2   95.09   18.70
  -5  -6   2   81.49   13.80
  -5  -6   2   60.69   13.30
   5  -6  -2   99.49   24.20
  -5   6   2  114.19   17.70
  -5   6   2   92.39   15.10
   5   6  -2   99.59   15.00
  -5   6   2   95.69   13.40
   5   6  -2   79.79   13.60
  -4  -6   2  179.18   28.90
   4  -6  -2  189.88   30.70
  -4  -6   2  219.68   28.80
   4  -6  -2  285.97   35.40
  -4   6   2  266.07   27.90
  -4   6   2  292.87   32.00
   4   6  -2  230.28   27.70
  -4   6   2  241.48   29.60
   4   6  -2  259.67   29.60
  -3  -6   2   35.90   11.50
  -3  -6   2   -5.20   11.90
   3  -6  -2   28.20   19.20
   3  -6  -2   19.80   13.60
  -3   6   2   46.80   12.90
  -3   6   2   24.60   10.40
   3   6  -2   43.80   11.20
   3   6  -2   34.80   10.10
  -3   6   2   27.50    8.90
   2  -6  -2  390.66   42.40
  -2  -6   2  337.97   41.00
  -2  -6   2  260.67   41.20
   2  -6  -2  344.17   44.40
   2   6  -2  286.37   38.90
  -2   6   2  371.56   40.10
   2   6  -2  381.06   40.70
  -2   6   2  405.06   41.30
  -2   6   2  377.66   39.10
   2   6  -2  324.97   39.70
  -1  -6   2   39.90   13.30
   1  -6  -2   50.09   15.00
   1  -6  -2   53.09   17.70
  -1  -6   2   35.90   15.50
  -1   6   2   43.40   10.30
   1   6  -2   65.89   13.50
   1   6  -2   43.90   11.10
  -1   6   2   47.10   12.00
  -1   6   2   59.79   12.80
   1   6  -2   45.10   10.40
   0  -6  -2  357.96   47.00
   0  -6  -2  368.16   46.00
   0  -6   2  398.46   45.80
   0   6  -2  356.96   44.40
   0   6   2  380.36   44.30
   0   6  -2  422.36   45.90
   0   6   2  402.06   43.80
   0   6  -2  372.76   43.60
   0   6   2  424.96   44.80
  -1  -6  -2  -10.10   13.60
   1  -6   2    8.60   12.00
  -1  -6  -2   -3.70   11.90
  -1   6  -2   -0.50    8.50
   1   6   2    5.10    9.20
  -1   6  -2    2.10   12.10
   1   6   2  -11.00    8.10
  -1   6  -2   -4.90    8.60
   1   6   2    2.30    8.90
   2  -6   2   -0.90   11.90
  -2  -6  -2   21.40   13.70
  -2  -6  -2   20.00   11.50
   2   6   2    3.00    8.70
  -2   6  -2   -0.20    8.90
  -2   6  -2    3.60   12.40
   2   6   2   13.40    9.50
  -2   6  -2   -2.40    8.50
  -3  -6  -2    8.70   12.50
  -3  -6  -2   21.50   11.90
   3  -6   2   15.60   12.80
   3   6   2   20.20    8.90
  -3   6  -2   32.40    9.30
  -3   6  -2   24.80   10.10
  -3   6  -2   31.80   13.40
   3   6   2   28.60   10.30
  -4  -6  -2  135.29   21.60
   4  -6   2  160.78   23.20
  -4  -6  -2  158.78   22.00
  -4   6  -2  149.09   20.40
  -4   6  -2  187.48   24.40
  -4   6  -2  161.98   21.30
   4   6   2  146.49   20.20
   4   6   2  161.68   20.80
  -5  -6  -2   49.30   12.90
   5  -6   2   48.50   14.60
  -5   6  -2   50.59   15.30
  -5   6  -2   37.40   11.80
   5   6   2   35.80   11.30
  -5   6  -2   48.50   10.50
   6  -6   2  297.47   40.30
  -6  -6  -2  306.57   37.70
  -6   6  -2  306.97   38.10
  -6   6  -2  354.16   41.30
  -6   6  -2  356.06   37.30
   7  -6   2  242.88   37.70
  -7   6  -2  326.87   38.80
  -7   6  -2  283.07   33.70
  -7   6  -2  295.27   35.00
   8  -6   2  109.99   23.40
  -8   6  -2  198.98   22.40
  -8   6  -2  156.78   24.90
  -8   6  -2  156.18   20.60
   9  -6   2  -13.00   14.20
  -9   6  -2   10.10   10.90
  -9   6  -2    0.00    9.30
  -9   6  -2   24.80   16.90
  10  -6   2   46.90   17.20
 -10   6  -2   62.69   19.20
 -10   6  -2   55.89   14.00
 -10   6  -2   49.30   11.90
  11  -6   2   -1.70   15.30
 -11   6  -2   -0.20   10.70
 -11   6  -2  -11.80   11.40
 -11   6  -2   -7.10   17.70
  12  -6   2    5.70   16.70
 -12   6  -2   30.80   20.80
 -12   6  -2    7.20   12.80
 -12   6  -2   15.30   10.40
  13  -6   2  104.49   22.20
  13  -6   2   55.19   21.60
 -13   6  -2  135.99   18.70
 -13   6  -2  121.29   26.80
 -13   6  -2   91.39   16.80
  14  -6   2   13.90   13.30
  14  -6   2   -6.60   17.40
 -14   6  -2   -4.70   13.70
 -14   6  -2  -11.20   10.70
 -14   6  -2   -6.90   23.20
  15  -6   2   -1.40   19.00
 -15   6  -2    9.90   13.20
 -15   6  -2   -1.70   13.70
 -15   6  -2    1.00   24.20
  16  -6   2   27.60   23.10
  16  -6   2   99.29   18.30
 -16   6  -2   78.69   17.80
 -16   6  -2   81.59   30.10
 -16   6  -2   61.29   16.30
  17  -6   2  -25.40   18.30
 -17   6  -2   43.60   30.70
 -17   6  -2    8.10   13.60
 -17   6  -2   -0.80   13.80
  18  -6   2  191.68   28.40
 -18   6  -2  198.98   28.30
 -18   6  -2  219.78   43.00
 -18   6  -2  131.99   24.30
  19  -6   2  -34.90   22.90
  19  -6   2    1.10   16.60
 -19   6  -2   -5.30   14.70
 -19   6  -2   37.40   33.90
  20  -6   2   28.60   23.00
 -20   6  -2  122.59   24.80
 -20   6  -2  100.89   40.50
  19  -7  -2   -5.60   26.50
 -19   7   2    6.10   20.70
 -19   7   2    3.60   40.00
  18  -7  -2   94.19   32.80
 -18   7   2  165.98   44.10
  17  -7  -2  -24.80   25.00
 -17   7   2   29.90   36.20
 -17   7   2   -0.30   20.60
 -17   7   2   -5.10   15.90
  16  -7  -2   41.80   27.00
 -16   7   2   63.89   20.30
 -16   7   2   49.90   34.70
 -16   7   2   80.99   21.00
  15  -7  -2  -11.00   20.90
  15  -7  -2   13.60   15.10
 -15   7   2   48.50   31.10
 -15   7   2    9.10   17.20
 -15   7   2   18.00   18.20
  14  -7  -2   17.80   19.90
  14  -7  -2   -5.90   14.00
 -14   7   2   49.70   28.80
 -14   7   2   34.10   19.80
 -14   7   2   32.70   15.10
  13  -7  -2  -11.30   20.10
 -13   7   2    2.90   13.90
 -13   7   2    9.30   16.70
 -13   7   2   31.20   26.60
  12  -7  -2   50.89   23.30
  12  -7  -2   93.19   20.00
 -12   7   2   75.99   19.40
 -12   7   2  125.99   29.60
 -12   7   2   74.59   19.00
  11  -7  -2   12.90   20.10
  11  -7  -2   41.80   13.40
 -11   7   2   37.50   15.70
 -11   7   2   35.90   15.60
 -11   7   2   29.80   23.80
  10  -7  -2   51.79   14.90
  10  -7  -2   29.80   20.10
 -10   7   2   71.89   24.20
 -10   7   2   51.99   16.00
 -10   7   2   26.90   15.10
   9  -7  -2   18.30   19.10
   9  -7  -2   27.40   13.00
  -9   7   2   48.80   15.70
  -9   7   2   30.60   14.30
  -9   7   2   41.60   21.60
   8  -7  -2   81.09   22.10
  -8   7   2   98.79   16.50
  -8   7   2   58.29   17.20
  -8   7   2   91.79   23.00
   7  -7  -2   59.29   30.00
   7  -7  -2   77.69   22.00
  -7   7   2   86.59   18.20
  -7   7   2   99.39   16.00
  -7   7   2  103.89   22.60
   6  -7  -2    7.50   17.60
   6  -7  -2  -19.80   22.90
  -6   7   2   34.50   12.10
   6   7  -2   40.20   13.90
  -6   7   2   31.30   17.10
  -6   7   2   19.20   14.40
   5  -7  -2   92.99   22.40
   5  -7  -2   97.89   30.00
   5   7  -2   83.29   17.90
  -5   7   2   94.69   21.40
   5   7  -2  117.69   18.50
  -5   7   2  134.29   17.60
  -5   7   2  122.89   19.80
   4  -7  -2   -6.00   24.40
   4  -7  -2    8.70   17.20
   4   7  -2   13.20   11.70
  -4   7   2  -12.10   10.70
  -4   7   2    5.60   14.30
   4   7  -2   19.60   12.30
  -4   7   2   10.80   12.60
   3  -7  -2   89.29   20.70
   3  -7  -2  104.39   26.90
  -3  -7   2   82.99   17.40
  -3   7   2   83.69   16.60
  -3   7   2   75.89   17.20
   3   7  -2   78.49   16.30
   3   7  -2   47.60   14.50
   3   7  -2   75.89   15.20
  -3   7   2   59.29   13.90
   2  -7  -2    2.60   17.00
   2  -7  -2  -22.00   18.70
  -2  -7   2   -6.00   15.50
  -2  -7   2   13.90   14.10
   2   7  -2    7.80   11.60
   2   7  -2   12.10   13.50
  -2   7   2   56.79   15.40
   2   7  -2    6.80   10.80
  -2   7   2   18.50   13.10
  -2   7   2    4.90   11.30
   1  -7  -2   35.10   22.00
   1  -7  -2   74.89   18.50
  -1  -7   2   62.39   16.40
  -1  -7   2   -3.50   17.50
   1   7  -2   49.99   13.30
  -1   7   2   96.99   16.70
  -1   7   2   53.29   14.50
   1   7  -2   40.30   14.00
  -1   7   2   39.00   13.40
   1   7  -2   51.19   16.50
   0  -7   2  131.99   23.20
   0  -7  -2  128.99   26.20
   0  -7   2   57.39   25.70
   0  -7  -2  155.78   24.60
   0   7  -2  120.49   20.10
   0   7   2  220.18   24.40
   0   7   2  151.28   21.30
   0   7  -2  145.59   21.30
   0   7  -2  146.89   23.20
   0   7   2  154.78   20.40
  -1  -7  -2    3.10   18.80
   1  -7   2   26.00   16.00
   1  -7   2    2.40   21.70
  -1   7  -2   74.59   17.70
   1   7   2   65.79   14.70
   1   7   2   75.09   14.30
  -1   7  -2   41.40   13.70
   1   7   2   39.20   12.80
  -1   7  -2   22.80   12.40
  -2  -7  -2  337.57   40.30
  -2  -7  -2  281.77   40.60
   2  -7   2  314.87   41.60
   2   7   2  290.47   39.00
  -2   7  -2  351.66   38.30
  -2   7  -2  300.57   38.80
   2   7   2  299.07   38.30
  -2   7  -2  355.26   41.00
  -3  -7  -2   90.39   18.60
   3  -7   2   64.79   18.50
  -3  -7  -2   81.09   17.60
  -3   7  -2  103.19   20.60
   3   7   2   32.80   12.90
   3   7   2   75.29   15.30
  -3   7  -2   66.79   14.40
  -3   7  -2   76.79   16.10
  -4  -7  -2  250.87   33.30
   4  -7   2  208.98   33.00
  -4  -7  -2  229.48   34.80
  -4   7  -2  247.48   32.00
  -4   7  -2  257.37   31.20
   4   7   2  206.88   29.90
  -4   7  -2  303.57   35.90
   5  -7   2   23.70   16.70
  -5   7  -2   18.70   18.80
  -5   7  -2   28.80   13.40
  -5   7  -2   18.70   11.40
   5   7   2   19.20   12.40
   6  -7   2   51.99   18.30
  -6   7  -2   25.60   14.80
   6   7   2   27.80   13.40
  -6   7  -2   63.29   13.40
  -6   7  -2   37.30   19.30
   7  -7   2    8.50   17.80
  -7   7  -2   18.60   14.20
  -7   7  -2   18.30   12.70
  -7   7  -2   62.19   20.20
   7   7   2   39.60   12.80
   8  -7   2   12.50   18.60
  -8   7  -2   65.79   21.80
  -8   7  -2   60.69   13.50
  -8   7  -2   76.69   16.00
   9  -7   2  -14.40   17.20
  -9   7  -2   10.10   21.30
  -9   7  -2   -0.60   13.00
  -9   7  -2   14.70   14.60
  10  -7   2  -15.00   17.70
 -10   7  -2   13.20   14.50
 -10   7  -2    6.50   21.20
 -10   7  -2  -21.60   11.50
  11  -7   2  -22.50   18.30
 -11   7  -2   12.00   14.10
 -11   7  -2    8.20   13.00
 -11   7  -2   -6.60   22.80
  12  -7   2    9.10   20.30
 -12   7  -2   27.20   13.90
 -12   7  -2   33.50   16.50
 -12   7  -2   42.00   25.80
  13  -7   2   47.00   23.80
 -13   7  -2   78.69   18.70
 -13   7  -2   58.79   16.30
 -13   7  -2  107.89   30.50
  14  -7   2   51.19   25.00
  14  -7   2   90.19   19.40
 -14   7  -2   86.19   20.60
 -14   7  -2  105.79   32.50
 -14   7  -2  100.09   21.20
  15  -7   2   11.70   23.80
 -15   7  -2   83.49   20.90
 -15   7  -2   84.09   33.80
 -15   7  -2   76.09   20.60
  16  -7   2   91.39   21.20
  16  -7   2   10.00   25.50
 -16   7  -2   77.79   20.70
 -16   7  -2  152.28   41.00
 -16   7  -2  109.59   21.40
  17  -7   2  -30.40   21.50
 -17   7  -2   22.10   18.70
 -17   7  -2    7.20   34.70
 -17   7  -2  -15.80   15.00
  18  -7   2  -18.80   20.60
  18  -7   2   17.40   21.60
 -18   7  -2   14.80   35.70
 -18   7  -2   11.70   17.70
 -18   7  -2   -5.60   15.00
 -17   8   2  234.58   53.59
 -17   8   2  212.48   33.80
 -17   8   2  161.28   30.10
  16  -8  -2    0.90   24.80
 -16   8   2  -10.00   22.30
 -16   8   2   33.00   39.40
  15  -8  -2  -13.10   25.40
 -15   8   2   53.79   38.00
 -15   8   2   14.60   23.00
 -15   8   2   21.30   17.70
  14  -8  -2    1.80   24.30
 -14   8   2   34.50   23.20
 -14   8   2    4.00   16.70
 -14   8   2   16.20   34.40
  13  -8  -2   -1.60   21.70
 -13   8   2   52.49   33.60
 -13   8   2   74.49   21.70
 -13   8   2   76.59   21.10
  12  -8  -2  -17.50   14.80
  12  -8  -2   -0.30   23.60
 -12   8   2  -12.30   17.10
 -12   8   2   -6.30   19.00
  11  -8  -2  137.69   30.20
  11  -8  -2  194.98   28.50
 -11   8   2  191.68   31.20
  10  -8  -2    5.20   22.00
  10  -8  -2  -81.89   29.10
 -10   8   2    9.90   20.10
 -10   8   2   26.10   15.60
   9  -8  -2   77.19   24.70
   9  -8  -2   13.30   32.20
  -9   8   2  125.89   19.70
  -9   8   2   92.29   23.40
  -9   8   2   98.09   28.80
   8  -8  -2   -3.10   21.10
   8  -8  -2  -88.09   27.70
  -8   8   2   26.70   18.10
  -8   8   2    9.30   14.20
  -8   8   2   -2.30   22.70
   7  -8  -2   44.10   22.60
   7  -8  -2   -9.70   34.30
  -7   8   2   40.90   18.70
   7   8  -2   65.99   16.40
  -7   8   2   32.70   18.40
  -7   8   2   49.00   23.00
   6  -8  -2   -7.00   20.30
   6  -8  -2  -32.10   27.30
  -6   8   2   -4.00   15.90
  -6   8   2    8.20   14.90
   6   8  -2  -11.60   13.80
  -6   8   2   16.10   23.70
   5  -8  -2    4.80   31.70
   5  -8  -2   53.09   22.60
   5   8  -2   49.99   15.90
  -5   8   2   40.20   21.90
  -5   8   2   55.19   17.40
  -5   8   2   35.20   15.20
   4  -8  -2  -53.79   28.50
   4  -8  -2   15.70   21.20
  -4   8   2   12.30   14.80
   4   8  -2    7.30   14.40
   4   8  -2    6.20   13.00
  -4   8   2   23.50   19.10
  -4   8   2  -31.10   12.60
   3  -8  -2   49.99   20.90
   3  -8  -2    4.40   28.40
  -3   8   2   61.99   19.10
  -3   8   2   53.89   16.40
  -3   8   2   13.10   14.30
   3   8  -2   -1.40   14.00
   3   8  -2    7.10   14.50
   2  -8  -2    9.70   27.00
   2  -8  -2   72.09   21.50
  -2   8   2   53.69   16.30
   2   8  -2    9.80   14.90
  -2   8   2   54.99   22.40
   2   8  -2   21.40   14.60
   2   8  -2    3.50   18.90
  -2   8   2   42.90   16.90
  -1  -8   2  152.98   30.40
   1  -8  -2  150.48   33.40
   1  -8  -2  219.08   31.20
  -1   8   2  209.68   28.10
   1   8  -2  203.78   29.30
   1   8  -2  176.08   26.70
   1   8  -2  129.79   26.70
  -1   8   2  193.28   26.00
   0  -8  -2  138.29   24.80
   0  -8  -2   72.99   27.20
   0  -8   2  120.99   24.10
   0   8   2  122.29   22.20
   0   8  -2   87.39   19.40
   0   8  -2  116.69   23.90
   0   8   2  109.99   20.10
   0   8  -2  139.39   21.80
   1  -8   2  405.36   55.09
   1  -8   2  353.36   57.49
  -1  -8  -2  452.55   54.69
  -1   8  -2  584.14   55.49
  -1   8  -2  378.26   49.99
   1   8   2  434.46   51.79
  -1   8  -2  416.56   52.09
  -2  -8  -2   64.69   22.60
   2  -8   2   52.19   21.90
   2  -8   2  -11.40   26.00
  -2   8  -2   83.59   21.10
   2   8   2   92.19   17.70
   2   8   2   45.30   15.90
  -2   8  -2   50.79   17.10
  -2   8  -2   50.39   18.30
   3  -8   2  305.37   49.70
   3  -8   2  309.47   46.70
  -3   8  -2  437.16   47.50
  -3   8  -2  380.36   43.30
   3   8   2  340.17   44.10
  -3   8  -2  337.97   44.10
   3   8   2  338.17   42.90
   4  -8   2   30.60   21.70
  -4   8  -2   23.30   16.10
   4   8   2   12.50   15.30
   4   8   2    7.00   13.70
  -4   8  -2    5.20   15.30
  -4   8  -2   53.89   24.80
   5  -8   2  106.09   27.20
   5   8   2  134.09   23.10
  -5   8  -2  140.79   24.10
  -5   8  -2  136.79   22.00
  -5   8  -2  181.88   33.60
   6  -8   2   -6.70   19.70
  -6   8  -2   -9.70   13.50
  -6   8  -2   19.80   18.80
   6   8   2   27.10   15.30
  -6   8  -2   19.20   21.80
   7  -8   2    2.10   20.80
  -7   8  -2   52.59   23.00
  -7   8  -2   26.10   14.90
  -7   8  -2   61.59   25.20
   7   8   2   38.60   16.00
   8  -8   2  -28.10   20.50
  -8   8  -2   28.30   24.40
  -8   8  -2   15.60   17.40
   8   8   2   23.90   15.10
  -8   8  -2   29.20   18.00
   9  -8   2    8.50   22.20
  -9   8  -2   81.09   21.00
  -9   8  -2  136.39   29.70
  -9   8  -2   82.09   20.20
  10  -8   2    0.60   22.40
 -10   8  -2  -26.10   17.00
 -10   8  -2   -1.80   17.70
  11  -8   2  -17.80   21.40
 -11   8  -2   16.80   29.00
 -11   8  -2    4.40   18.80
 -11   8  -2    1.70   20.20
  12  -8   2  -39.00   19.50
 -12   8  -2  -12.60   17.60
 -12   8  -2  -15.20   17.20
 -12   8  -2    8.70   30.20
  13  -8   2   -9.10   24.00
 -13   8  -2   50.29   20.20
 -13   8  -2   52.89   34.60
 -13   8  -2   57.69   20.70
  14  -8   2    8.40   20.90
  14  -8   2  -22.80   23.40
 -14   8  -2   -0.20   16.40
 -14   8  -2   38.00   35.50
  15  -8   2   46.90   20.10
  15  -8   2   18.90   25.20
 -15   8  -2   56.39   20.80
 -15   8  -2   49.50   38.00
 -15   8  -2   11.80   18.00
 -16   8  -2   28.70   22.40
  13  -9  -2 -141.29   42.50
  13  -9  -2   43.00   25.30
 -13   9   2   73.29   24.30
  12  -9  -2  -95.09   35.10
  12  -9  -2  -16.00   25.30
 -12   9   2   17.60   22.20
  11  -9  -2   -8.20   23.70
 -11   9   2   -3.60   20.90
  11   9  -2   45.80   17.70
  10  -9  -2 -123.59   41.20
  10  -9  -2   13.90   26.60
 -10   9   2   18.30   17.60
  10   9  -2   46.20   17.80
 -10   9   2   31.40   23.10
 -10   9   2   48.10   31.30
   9  -9  -2   39.30   26.60
   9  -9  -2 -136.69   39.40
  -9   9   2   11.80   28.00
   9   9  -2   -2.70   16.90
  -9   9   2    7.50   23.70
   8  -9  -2  -87.69   38.70
   8  -9  -2   35.50   25.60
  -8   9   2  -13.90   18.50
   8   9  -2    2.10   17.00
  -8   9   2   11.90   18.10
   7  -9  -2  -26.10   40.40
   7  -9  -2   40.30   25.10
   7   9  -2   33.50   17.70
  -7   9   2   45.00   21.70
  -7   9   2   66.49   36.60
  -7   9   2   28.00   18.50
   6  -9  -2   13.50   24.90
   6  -9  -2  -21.10   36.30
  -6   9   2   44.10   23.80
  -6   9   2   -8.90   16.90
  -6   9   2   52.89   24.50
   6   9  -2    4.10   15.80
   6   9  -2    9.40   17.00
   5  -9  -2   -1.30   36.20
   5  -9  -2   42.80   24.50
   5   9  -2   47.30   18.30
   5   9  -2   16.00   16.80
  -5   9   2   18.10   23.40
  -5   9   2    9.40   17.90
   4  -9  -2   47.10   24.70
   4  -9  -2  -14.10   35.00
   4   9  -2   20.10   16.00
   4   9  -2    7.30   16.60
  -4   9   2   44.40   25.50
  -4   9   2    0.50   18.70
   3  -9  -2   89.09   41.40
   3  -9  -2   65.19   25.40
   3   9  -2   22.30   16.70
  -3   9   2   62.89   20.90
   3   9  -2   51.69   18.20
  -3   9   2   18.00   18.00
   2  -9  -2   44.50   24.10
  -2   9   2   -0.20   17.10
  -2   9   2   -3.70   19.80
   2   9  -2   12.40   18.40
   2   9  -2   14.00   18.90
   1   9  -2  111.29   26.00
  -1   9   2  149.59   26.40
   1   9  -2  120.49   24.40
  -1   9   2  142.89   24.20
   0   9  -2   -2.10   17.80
   0   9   2    7.10   16.10
   0   9  -2   40.10   21.00
   0   9   2   16.20   18.30
   1   9   2  117.39   24.90
   1   9   2   79.99   21.50
  -1   9  -2   70.49   22.90
  -1   9  -2  154.08   25.00
  -2   9  -2    2.60   18.20
  -2   9  -2   67.09   22.10
   2   9   2   -8.70   15.70
   2   9   2   35.90   18.70
  -2   9  -2   -4.20   26.20
   3  -9   2   29.20   23.10
  -3   9  -2   23.60   19.00
  -3   9  -2   54.99   21.50
   3   9   2   51.59   19.10
  -3   9  -2   57.09   29.20
   3   9   2   44.40   17.90
   4  -9   2   -4.60   22.10
  -4   9  -2    6.90   28.50
  -4   9  -2   34.10   20.50
   4   9   2   23.30   17.90
   4   9   2   23.90   16.80
  -4   9  -2   13.50   19.20
   5  -9   2  -37.10   30.50
   5  -9   2   87.29   25.10
   5   9   2  102.09   22.70
  -5   9  -2  114.49   22.80
  -5   9  -2   51.69   20.50
   5   9   2   56.99   19.60
  -5   9  -2   83.39   27.70
   6  -9   2  -40.00   37.90
   6  -9   2   13.20   23.60
  -6   9  -2   47.00   19.50
  -6   9  -2   70.19   28.10
  -6   9  -2   74.99   28.60
   6   9   2   82.19   19.40
   7  -9   2  -15.30   22.50
  -7   9  -2   99.39   28.80
  -7   9  -2   91.39   30.00
  -7   9  -2   55.79   21.90
   8  -9   2   10.50   23.60
  -8   9  -2   83.19   24.50
  -8   9  -2   34.00   21.00
  -8   9  -2   62.39   30.00
   9  -9   2  -37.40   24.50
  -9   9  -2   47.00   34.60
  -9   9  -2   20.10   17.80
  -9   9  -2   34.60   21.80
  10  -9   2  -11.60   24.10
 -10   9  -2   63.59   23.50
 -10   9  -2   88.19   34.90
 -10   9  -2   45.50   19.20
  11  -9   2  -25.30   26.00
 -11   9  -2   10.40   18.00
 -11   9  -2   23.00   23.20
 -11   9  -2   28.80   34.40
  12  -9   2   13.20   18.10
 -12   9  -2    4.40   23.10
 -12   9  -2   21.80   36.90
   8  10  -2   38.40   21.00
   8  10  -2   47.20   18.90
   7 -10  -2   69.59   29.20
   7  10  -2    9.50   19.10
  -7  10   2   41.50   24.50
   7  10  -2   78.49   20.80
   6 -10  -2  173.18   37.50
  -6  10   2  218.78   37.40
   6  10  -2  170.18   30.50
   6  10  -2  171.28   28.30
   5 -10  -2   86.69   29.00
  -5  10   2   23.70   22.10
   5  10  -2   52.29   22.80
   5  10  -2   27.30   20.30
  -4  10   2  190.28   31.60
   4  10  -2  186.68   29.50
   4  10  -2  132.29   29.70
   3  10  -2   -2.90   17.90
  -3  10   2   66.09   28.20
   3  10  -2   63.59   22.10
  -3  10   2   14.00   19.30
  -2  10   2  208.58   31.10
   2  10  -2  173.18   28.90
  -2  10   2  114.59   29.10
   2  10  -2  129.99   29.80
  -1  10   2   76.89   27.80
   1  10  -2   37.90   22.30
   1  10  -2   70.09   24.20
   0  10   2  109.99   26.10
   0  10   2   94.49   25.20
   0  10  -2  116.59   25.60
   0  10  -2  106.89   23.60
   1  10   2  -13.80   19.20
  -1  10  -2    3.00   26.40
   1  10   2   41.40   23.20
   2  10   2   57.29   25.00
  -2  10  -2   35.90   25.90
  -3  10  -2   26.70   22.20
  -3  10  -2   23.00   22.60
   3  10   2   33.60   26.00
   4  10   2  100.39   25.20
  -4  10  -2   83.09   33.10
  -5  10  -2   16.10   19.10
  -5  10  -2   35.20   27.60
   5  10   2   49.60   23.90
   6 -10   2   80.69   32.50
  -6  10  -2  123.29   28.30
   6  10   2  137.69   29.80
  -7  10  -2   70.49   31.70
 -26   0   3   -8.50   17.00
  26   0  -3  -12.60   18.90
 -25   0   3   37.20   16.70
  25   0  -3   -3.80   17.50
 -24   0   3   -2.60   15.00
  24   0  -3   -5.70   17.40
  23   0  -3   -0.50   15.90
 -23   0   3   34.30   15.00
  22   0  -3  -13.10   15.80
 -22   0   3  -18.50   12.90
  21   0  -3   43.60   16.30
  21   0  -3   27.10   15.50
 -21   0   3   37.10   13.80
  20   0  -3  -14.20   17.30
  20   0  -3   -8.80   13.10
 -20   0   3    5.00   11.70
  19   0  -3  154.28   24.40
 -19   0   3  192.58   23.60
  19   0  -3  189.18   27.70
  18   0  -3   -8.90   12.10
 -18   0   3    1.30   10.20
  18   0  -3   -6.00   12.00
  17   0  -3  579.44   72.29
 -17   0   3  612.54   71.79
 -17   0   3  688.73   70.99
  17   0  -3  726.33   73.29
 -16   0   3    2.00    8.70
 -16   0   3    5.20    6.80
  16   0  -3   -3.00   10.00
  16   0  -3   10.40   10.30
  15   0  -3  193.68   24.20
 -15   0   3  165.68   21.30
  15   0  -3  201.18   23.20
 -15   0   3  168.58   21.90
  14   0  -3   12.40    8.50
 -14   0   3   -6.40    7.30
  14   0  -3   -3.30    9.00
 -14   0   3    1.90    6.00
 -13   0   3  202.88   24.20
  13   0  -3  253.47   26.00
  13   0  -3  186.68   25.50
 -13   0   3  194.58   24.80
 -12   0   3   -4.20    6.10
  12   0  -3   33.00    7.60
  12   0  -3    4.30    8.00
 -12   0   3    3.20    5.50
 -11   0   3  689.43   75.59
  11   0  -3  699.93   76.09
 -11   0   3  696.23   75.89
  11   0  -3  732.43   76.29
 -10   0   3    4.00    5.20
  10   0  -3   -9.60    6.70
 -10   0   3    2.90    5.60
   9   0  -3   41.50    6.80
  -9   0   3   21.40    6.00
   9   0  -3   13.20    7.00
  -9   0   3   17.80    5.90
   8   0  -3   -1.00    5.60
  -8   0   3   -5.00    4.50
  -8   0   3   -6.40    4.50
  -7   0   3  242.58   27.80
   7   0  -3  243.08   27.90
   7   0  -3  271.17   28.00
  -7   0   3  246.18   27.80
  -6   0   3   -1.50    4.10
  -6   0   3    4.50    3.90
   6   0  -3    4.70    4.40
  -5   0   3 3949.80  409.16
   5   0  -3 3757.12  409.16
   5   0  -3 3652.03  409.16
  -5   0   3 4058.09  409.06
  -4   0   3    2.50    3.30
   4   0  -3    6.50    3.90
  -4   0   3    7.00    3.60
   4   0  -3    2.70    3.70
   3   0  -3   30.50    4.60
   3   0  -3   22.40    4.70
  -3   0   3   23.10    4.40
   3   0  -3   26.90    5.50
  -3   0   3   30.20    4.10
   2   0  -3   -5.40    2.70
   2   0  -3   -3.00    2.60
  -2   0   3    1.90    2.10
  -2   0   3   -2.10    2.70
  -2   0   3   -3.80    3.20
  -2   0   3   -0.90    2.40
   2   0  -3   -0.70    2.60
   2   0  -3    2.10    1.90
   2   0  -3   -4.30    3.60
  -1   0   3  927.21   95.29
  -1   0   3  889.61   95.29
   1   0  -3  883.91   95.29
   1   0  -3  866.01   95.39
   1   0  -3  872.61   95.49
   1   0  -3  941.41   95.29
   0   0  -3   -3.60    3.10
   0   0  -3   -1.00    1.80
   0   0   3    1.70    2.60
   0   0  -3    1.30    2.70
   0   0   3   -0.30    1.80
   0   0  -3   -0.30    2.30
   0   0   3    1.80    2.70
  -1   0  -3   90.79   10.80
   1   0   3  103.29   11.00
  -1   0  -3   99.19   12.20
   1   0   3  110.09   11.00
  -1   0  -3  103.49   11.80
   1   0   3  112.29   11.70
  -1   0  -3   89.89   10.90
  -2   0  -3   -2.30    4.80
   2   0   3    3.00    2.40
  -2   0  -3   -2.10    1.90
  -2   0  -3   -4.70    3.30
   2   0   3   -3.50    3.30
  -3   0  -3 6792.22  753.32
  -3   0  -3 7232.18  753.32
  -3   0  -3 7220.58  754.22
   3   0   3 7152.68  753.42
  -4   0  -3    1.70    2.50
  -4   0  -3    0.10    4.20
  -4   0  -3    1.70    5.30
   4   0   3    0.00    4.00
  -5   0  -3 1585.24  162.48
  -5   0  -3 1520.55  162.88
  -5   0  -3 1483.55  163.18
   5   0   3 1523.75  162.88
  -6   0  -3   -2.40    4.70
  -6   0  -3   -1.10    3.00
   6   0   3   -1.70    2.00
  -6   0  -3    1.30    5.70
   6   0   3    2.30    4.60
  -7   0  -3   41.40    7.90
   7   0   3   38.10    7.50
   7   0   3   47.40    7.40
  -7   0  -3   37.40    6.00
   8   0   3    6.20    5.80
  -8   0  -3   -6.80    6.00
  -8   0  -3   -6.00    3.90
   8   0   3   -1.40    5.60
   9   0   3  106.69   15.50
  -9   0  -3  105.89   13.80
  -9   0  -3  102.49   15.30
   9   0   3  136.99   14.70
  10   0   3   -2.70    6.20
  10   0   3   -2.80    6.40
 -10   0  -3   -1.70    4.60
 -10   0  -3  -10.50    7.00
  11   0   3  567.64   61.59
 -11   0  -3  579.34   62.29
 -11   0  -3  555.34   60.69
  11   0   3  547.85   60.99
 -12   0  -3    7.00    5.80
  12   0   3   -7.20    7.00
  12   0   3   -4.50    6.90
 -12   0  -3  -10.60    8.60
 -13   0  -3  359.96   42.00
 -13   0  -3  342.37   39.60
  13   0   3  364.36   41.00
  13   0   3  364.76   40.10
 -14   0  -3    1.10    6.90
 -14   0  -3    3.20   10.60
  14   0   3   -2.60    8.30
  14   0   3   -4.10    8.80
  15   0   3  736.73   84.99
 -15   0  -3  738.23   84.69
  15   0   3  885.61   86.39
 -15   0  -3  779.92   87.09
 -16   0  -3   -7.70    8.00
  16   0   3   15.50   10.60
 -16   0  -3   10.90   13.40
  16   0   3   -3.60   10.00
  17   0   3  162.68   22.40
  17   0   3  178.68   24.30
 -17   0  -3  163.38   21.20
 -17   0  -3  153.28   25.50
 -18   0  -3   -4.00    9.60
  18   0   3   10.20   11.50
  18   0   3    8.50   12.20
 -19   0  -3   14.40   10.70
  19   0   3   18.20   17.00
  19   0   3    0.70   12.90
  20   0   3    8.00   13.40
 -20   0  -3   11.10   11.50
  20   0   3   11.90   15.60
  21   0   3  361.26   45.10
 -21   0  -3  348.57   41.60
  21   0   3  331.67   43.90
  22   0   3   10.20   15.80
 -22   0  -3    4.30   12.70
  23   0   3  212.38   31.50
 -23   0  -3  218.28   28.70
 -24   0  -3   21.90   14.60
  24   0   3    4.20   18.10
 -26  -1   3    1.40   16.80
  26  -1  -3    9.60   17.80
 -26   1   3    2.20   17.20
  26   1  -3   18.00   22.80
  25  -1  -3  -11.80   16.70
 -25  -1   3   -3.80   15.50
  25   1  -3   17.70   20.20
 -25   1   3  -10.30   15.90
  24  -1  -3   48.10   18.90
 -24  -1   3   42.00   16.40
  24   1  -3   53.19   20.00
 -24   1   3   44.80   16.60
  23  -1  -3  -19.10   18.30
  23  -1  -3    5.10   15.10
 -23  -1   3    3.20   14.20
  23   1  -3    7.00   17.30
 -23   1   3    6.00   13.90
 -22  -1   3   47.40   15.00
  22  -1  -3   28.50   17.00
 -22   1   3   50.69   14.60
  22   1  -3   58.49   18.10
 -21  -1   3   10.60   13.20
  21  -1  -3   13.60   17.20
  21  -1  -3   13.30   13.80
  21   1  -3    8.20   15.30
 -21   1   3   19.00   12.50
  20  -1  -3    9.30   13.20
 -20  -1   3  -13.40   11.90
  20  -1  -3    8.10   15.10
 -20   1   3   -1.40   11.40
  20   1  -3    1.60   14.30
 -19  -1   3   11.10   11.40
  19  -1  -3   -6.60   12.20
  19   1  -3   12.60   13.20
  19   1  -3    7.10   13.90
 -19   1   3   13.60   10.90
  18  -1  -3   12.90   13.30
  18  -1  -3   27.60   12.80
 -18  -1   3   17.90   10.80
 -18   1   3    1.00    9.90
 -18   1   3    2.90    7.80
  18   1  -3  -10.90   13.20
  18   1  -3   -6.10   11.40
  17  -1  -3  122.59   18.80
 -17  -1   3  113.79   18.00
  17  -1  -3  126.79   20.50
  17   1  -3  118.19   19.40
  17   1  -3  129.89   19.30
 -17   1   3  139.49   17.30
 -17   1   3  130.79   17.50
  16  -1  -3   21.20   12.00
  16  -1  -3    4.80   10.70
 -16  -1   3    8.90    6.00
 -16  -1   3   14.40    9.20
  16   1  -3   10.60   11.00
 -16   1   3   -1.30    8.20
  16   1  -3   -4.30    9.40
 -16   1   3    2.30    7.00
 -15  -1   3  311.87   34.90
  15  -1  -3  293.87   36.40
  15  -1  -3  383.16   38.60
 -15  -1   3  283.27   36.10
 -15   1   3  330.87   36.00
  15   1  -3  285.57   36.50
  15   1  -3  313.77   36.70
 -15   1   3  331.77   35.30
  14  -1  -3   66.69   12.30
 -14  -1   3   47.20   10.50
  14  -1  -3   51.59   11.00
 -14  -1   3   48.50    8.30
 -14   1   3   58.69    9.10
 -14   1   3   53.59    9.50
  14   1  -3   45.60    9.90
  14   1  -3   45.10   11.80
 -13  -1   3   41.00   10.50
  13  -1  -3   69.49   12.10
 -13  -1   3   60.59    8.90
  13  -1  -3   71.69   11.30
 -13   1   3   54.79    9.50
  13   1  -3   78.99   12.00
  13   1  -3   63.09   10.40
 -13   1   3   60.59    9.60
 -12  -1   3   82.89   10.40
  12  -1  -3   83.29   12.20
 -12  -1   3   72.29   11.60
  12  -1  -3  106.29   13.50
  12   1  -3   58.79   12.30
 -12   1   3   72.59   10.90
  12   1  -3   68.19   11.30
 -12   1   3   81.29   10.90
 -11  -1   3  392.76   42.70
  11  -1  -3  405.66   43.60
 -11  -1   3  381.56   42.00
  11  -1  -3  398.56   42.80
  11   1  -3  376.26   42.80
  11   1  -3  361.06   42.50
 -11   1   3  392.86   42.40
 -11   1   3  394.26   42.30
  10  -1  -3   89.69   12.30
  10  -1  -3  124.29   15.00
 -10  -1   3   88.59   12.00
 -10  -1   3   90.79   11.70
 -10   1   3   71.49   15.10
  10   1  -3   75.49   12.40
 -10   1   3   72.59   11.20
 -10   1   3   98.89   11.50
  10   1  -3   76.89   11.30
   9  -1  -3  258.57   28.30
   9  -1  -3  301.37   29.40
  -9  -1   3  234.28   27.70
  -9  -1   3  233.08   28.30
  -9   1   3  239.98   27.80
   9   1  -3  234.28   27.80
   9   1  -3  277.37   28.50
  -9   1   3  231.38   30.60
  -9   1   3  253.37   27.90
   8  -1  -3   92.69   11.90
  -8  -1   3   84.79   10.90
   8  -1  -3   84.49   11.00
  -8  -1   3   88.89   10.20
  -8   1   3   67.69   12.90
   8   1  -3   64.79   10.00
   8   1  -3   92.09   11.40
  -8   1   3   92.29   10.50
  -8   1   3   75.19   10.20
   7  -1  -3  274.67   29.30
   7  -1  -3  260.77   28.50
  -7  -1   3  257.07   28.20
  -7  -1   3  263.97   28.70
  -7   1   3  271.47   28.40
  -7   1   3  250.37   28.20
  -7   1   3  263.07   30.40
   7   1  -3  228.98   28.00
   7   1  -3  267.97   28.80
   6  -1  -3   88.49   11.10
  -6  -1   3   82.49   11.00
  -6  -1   3   74.69   10.20
  -6  -1   3   97.09   11.00
   6  -1  -3   89.69   12.30
   6   1  -3   90.59   11.20
  -6   1   3   79.89   10.60
   6   1  -3   95.19   10.30
  -6   1   3   91.59   12.90
  -6   1   3   78.89   11.00
   5  -1  -3  288.07   33.50
  -5  -1   3  277.77   32.50
  -5  -1   3  320.17   33.10
  -5  -1   3  314.47   32.90
   5  -1  -3  298.37   32.90
  -5   1   3  305.97   32.90
   5   1  -3  326.27   32.60
  -5   1   3  298.77   32.70
   5   1  -3  314.37   33.10
  -5   1   3  289.37   33.90
  -4  -1   3   25.20    3.60
   4  -1  -3   22.20    5.90
  -4  -1   3   23.60    4.70
   4  -1  -3   28.70    4.80
  -4   1   3   25.00    4.10
  -4   1   3   22.40    6.50
   4   1  -3   24.70    4.30
   4   1  -3   33.90    5.80
  -4   1   3   30.70    4.70
   3  -1  -3  117.39   12.20
   3  -1  -3  103.39   13.50
   3  -1  -3  140.79   14.50
  -3  -1   3  118.99   12.60
  -3  -1   3  105.59   12.00
  -3   1   3  109.59   11.90
   3   1  -3  102.89   13.00
   3   1  -3   83.39   11.90
   3   1  -3  119.99   12.80
  -3   1   3  112.09   12.50
   2  -1  -3 1424.46  154.88
   2  -1  -3 1327.17  154.28
  -2  -1   3 1475.75  154.48
   2  -1  -3 1539.75  154.38
  -2  -1   3 1440.66  154.38
   2  -1  -3 1493.85  154.78
   2   1  -3 1507.75  154.68
  -2   1   3 1431.16  154.28
  -2   1   3 1446.76  154.48
   2   1  -3 1333.17  154.38
  -2   1   3 1486.75  154.28
   2   1  -3 1544.45  154.48
  -1  -1   3  628.54   67.59
   1  -1  -3  674.73   67.99
   1  -1  -3  684.43   67.39
  -1  -1   3  644.94   67.69
   1  -1  -3  566.64   67.39
   1  -1  -3  580.54   67.59
  -1  -1   3  610.34   67.79
   1  -1  -3  652.13   68.19
   1   1  -3  651.03   67.79
   1   1  -3  653.73   67.99
  -1   1   3  645.94   67.39
  -1   1   3  608.74   67.39
   1   1  -3  666.53   67.69
  -1   1   3  625.94   67.59
   0  -1  -3  152.88   18.00
   0  -1   3  177.88   18.30
   0  -1  -3  163.98   18.90
   0  -1  -3  165.28   17.80
   0  -1   3  168.08   18.40
   0  -1  -3  160.98   19.10
   0   1   3  164.68   17.70
   0   1  -3  176.18   19.00
   0   1  -3  154.38   18.40
   0   1   3  154.68   18.00
   0   1  -3  193.68   18.80
   1  -1   3   28.90    5.50
   1  -1   3   35.50    5.10
  -1  -1  -3   27.10    6.30
  -1  -1  -3   38.80    4.50
  -1   1  -3   40.70    6.50
  -1   1  -3   39.00    5.30
  -1   1  -3   28.80    6.40
  -1   1  -3   32.30    5.20
   1   1   3   46.20    4.70
  -2  -1  -3 1241.18  137.59
   2  -1   3 1270.17  137.19
   2  -1   3 1305.37  137.49
  -2  -1  -3 1352.76  137.09
  -2   1  -3 1263.37  137.59
   2   1   3 1339.37  136.99
  -2   1  -3 1290.07  137.19
   2   1   3 1271.87  136.99
  -2   1  -3 1276.17  137.19
  -3  -1  -3  167.68   18.70
   3  -1   3  148.79   19.10
   3  -1   3  200.68   20.00
  -3  -1  -3  214.88   20.10
  -3   1  -3  160.08   18.90
  -3   1  -3  186.18   19.00
  -3   1  -3  152.38   20.10
   3   1   3  163.08   18.70
  -4  -1  -3   23.90    4.40
   4  -1   3   26.00    4.30
  -4  -1  -3   29.80    4.40
  -4  -1  -3   29.50    6.60
   4  -1   3   28.10    5.90
   4   1   3   27.50    4.40
   4   1   3   20.30    4.10
  -4   1  -3   23.00    6.30
  -4   1  -3   32.00    4.70
  -4   1  -3   22.00    4.00
  -5  -1  -3  970.30  122.49
   5  -1   3 1101.59  121.99
   5  -1   3 1163.88  122.49
  -5  -1  -3 1177.08  122.09
  -5  -1  -3 1276.37  121.99
  -5   1  -3 1190.58  121.99
   5   1   3 1197.38  122.39
  -5   1  -3 1117.89  121.89
   5   1   3 1162.58  121.99
  -5   1  -3 1102.69  122.49
   6  -1   3  310.47   35.40
  -6  -1  -3  351.16   34.50
  -6  -1  -3  333.97   35.70
  -6  -1  -3  302.57   34.80
  -6   1  -3  288.77   34.10
   6   1   3  328.47   34.50
  -6   1  -3  302.77   35.50
   6   1   3  337.77   35.00
  -6   1  -3  312.67   34.40
  -7  -1  -3   99.09   13.30
  -7  -1  -3   92.39   11.70
  -7  -1  -3   90.39   12.10
   7  -1   3   98.09   13.40
  -7   1  -3   79.49   10.80
  -7   1  -3   81.09   12.70
   7   1   3  104.79   11.70
  -7   1  -3   95.69   11.20
   7   1   3   92.09   12.40
  -8  -1  -3  103.49   14.60
  -8  -1  -3   95.09   13.30
   8  -1   3  102.39   13.80
  -8  -1  -3  109.09   12.40
  -8   1  -3   90.99   11.70
   8   1   3  100.59   13.20
  -8   1  -3   95.49   12.50
   8   1   3  131.29   13.10
  -8   1  -3   81.79   13.70
   9  -1   3  197.18   25.80
   9  -1   3  234.78   27.10
  -9  -1  -3  243.78   25.50
  -9  -1  -3  207.38   26.40
   9   1   3  234.18   26.30
   9   1   3  220.28   25.80
  -9   1  -3  237.68   24.70
  -9   1  -3  230.98   27.20
  -9   1  -3  213.88   25.20
 -10  -1  -3  114.89   15.80
 -10  -1  -3  101.69   14.20
  10  -1   3  125.59   15.20
  10  -1   3  128.09   16.20
  10   1   3  120.39   15.20
 -10   1  -3  115.59   14.20
  10   1   3  145.99   15.10
 -10   1  -3  100.29   13.50
 -10   1  -3  111.99   16.30
 -11  -1  -3  287.27   33.70
  11  -1   3  279.97   33.60
 -11  -1  -3  306.97   32.30
  11  -1   3  280.37   32.60
  11   1   3  283.37   32.90
 -11   1  -3  278.17   32.00
  11   1   3  304.07   32.40
 -11   1  -3  281.37   34.40
  12  -1   3  345.57   38.50
  12  -1   3  334.77   37.40
 -12  -1  -3  324.97   38.40
 -12  -1  -3  334.57   36.90
 -12   1  -3  332.77   39.30
  12   1   3  311.07   37.50
  12   1   3  337.57   37.20
 -12   1  -3  339.17   36.80
  13  -1   3   -0.30    7.90
 -13  -1  -3   13.30    7.40
  13  -1   3   11.30    8.90
 -13   1  -3   10.30    6.20
  13   1   3    4.30    8.20
 -13   1  -3   19.00   10.60
  13   1   3    6.70    7.80
 -14  -1  -3  141.09   19.10
  14  -1   3  139.09   19.70
  14  -1   3  166.88   22.60
 -14   1  -3  150.48   19.40
  14   1   3  145.39   21.20
 -14   1  -3  171.28   23.10
  14   1   3  168.18   20.20
 -15  -1  -3   88.49   14.60
  15  -1   3  109.69   17.20
  15  -1   3  115.49   15.80
 -15   1  -3   87.79   13.90
  15   1   3  119.69   16.20
  15   1   3  104.09   16.00
 -15   1  -3   95.29   18.70
 -16  -1  -3    1.60    9.00
  16  -1   3   22.60   11.80
  16  -1   3  -14.80    9.70
  16   1   3   16.90   11.20
  16   1   3    9.30   10.20
 -16   1  -3   18.60    8.40
 -16   1  -3   15.80   14.10
 -17  -1  -3   -2.10    9.60
  17  -1   3   29.30   13.50
  17  -1   3    3.70   10.90
  17   1   3    4.30   10.70
  17   1   3    0.80   11.80
 -17   1  -3    6.20    8.50
 -17   1  -3   -2.50   15.10
  18  -1   3    7.40   11.20
 -18  -1  -3   16.40   10.80
  18  -1   3   17.30   15.20
 -18   1  -3   30.60   18.50
  18   1   3   29.60   14.10
 -18   1  -3   15.30   10.00
  18   1   3    6.70   12.00
 -19  -1  -3   30.10   12.60
  19  -1   3   81.79   15.10
  19  -1   3   66.39   18.00
  19   1   3   12.10   15.50
  19   1   3   30.80   17.70
 -19   1  -3   57.69   12.40
 -19   1  -3   67.39   20.40
  20  -1   3   27.60   14.00
  20  -1   3   64.99   19.00
 -20  -1  -3   52.89   13.50
 -20   1  -3  127.09   24.30
  20   1   3   41.70   17.30
  20   1   3   46.80   15.90
 -20   1  -3   53.49   13.40
  21  -1   3   66.39   19.10
  21  -1   3   32.90   16.60
 -21  -1  -3   55.99   14.50
 -21   1  -3   57.69   14.00
  21   1   3   67.89   19.70
  22  -1   3   41.80   20.10
 -22  -1  -3   39.40   13.80
  22  -1   3   31.40   15.20
  22   1   3   31.20   19.90
 -22   1  -3   23.30   13.20
  23  -1   3   16.70   15.30
 -23  -1  -3   11.80   13.70
  23  -1   3   -2.90   19.40
  23   1   3    2.40   19.90
 -23   1  -3    6.60   13.40
  24  -1   3   77.29   25.40
  24  -1   3   66.59   18.40
 -24  -1  -3   21.50   15.10
  24   1   3   48.90   21.00
 -24   1  -3   38.90   16.00
 -25  -2   3    6.60   16.30
  25  -2  -3   -1.70   18.30
  25   2  -3    3.20   22.60
 -25   2   3    8.70   16.50
  24  -2  -3   34.10   24.80
  24  -2  -3   21.30   16.60
 -24  -2   3   63.79   17.40
  24   2  -3   73.59   23.50
 -24   2   3   68.29   17.10
  23  -2  -3   29.80   20.30
  23  -2  -3   28.40   16.10
 -23  -2   3   39.20   16.10
  23   2  -3  105.39   21.90
 -23   2   3   46.80   15.80
  22  -2  -3   56.79   16.40
 -22  -2   3   88.89   16.60
  22  -2  -3   55.19   22.30
 -22   2   3   59.09   15.60
  22   2  -3   57.49   21.90
  21  -2  -3  143.49   29.50
 -21  -2   3  163.58   23.70
  21  -2  -3  180.68   25.20
 -21   2   3  155.08   23.20
  21   2  -3  195.78   27.20
  20  -2  -3   22.00   13.70
 -20  -2   3   35.90   13.90
  20  -2  -3   33.40   18.60
  20   2  -3   36.80   16.90
 -20   2   3   47.40   12.90
  19  -2  -3   28.90   16.40
  19  -2  -3   32.50   12.50
 -19  -2   3   -3.20   12.00
 -19   2   3   27.70    9.60
  19   2  -3   22.60   16.00
 -19   2   3   21.60   11.70
 -18  -2   3   23.70   11.80
  18  -2  -3   18.70   15.80
  18  -2  -3   11.00   11.40
 -18   2   3    9.00   10.10
 -18   2   3   24.50    9.40
  18   2  -3   22.60   15.00
 -17  -2   3   37.70   11.80
  17  -2  -3   14.60   11.80
  17  -2  -3   51.59   15.00
 -17   2   3   17.90    9.60
  17   2  -3   22.40   14.30
 -17   2   3   29.10    9.50
 -16  -2   3  205.58   28.40
  16  -2  -3  279.67   31.80
  16  -2  -3  208.88   28.30
 -16   2   3  264.67   33.50
 -16   2   3  240.58   27.80
  16   2  -3  192.88   28.00
  16   2  -3  202.18   29.10
 -16   2   3  262.57   27.50
  15  -2  -3    1.80   11.60
  15  -2  -3   -3.10    9.40
 -15  -2   3    5.60    9.10
  15   2  -3  -13.00    7.70
 -15   2   3   11.70    7.50
 -15   2   3   -4.60   13.80
  15   2  -3   -0.10   10.70
 -15   2   3    4.30    7.80
  14  -2  -3  426.16   46.70
 -14  -2   3  411.66   43.50
 -14  -2   3  405.76   44.90
  14  -2  -3  390.16   44.70
 -14   2   3  389.46   44.30
 -14   2   3  395.66   48.20
  14   2  -3  363.76   45.00
  14   2  -3  366.36   44.50
 -14   2   3  440.36   44.20
  13  -2  -3   84.49   12.60
 -13  -2   3   84.89   12.80
 -13  -2   3   75.79   10.30
  13  -2  -3   88.19   14.70
  13   2  -3   61.09   11.00
 -13   2   3   98.09   11.60
 -13   2   3   82.89   11.40
  13   2  -3   80.29   13.60
 -13   2   3   63.09   15.60
  12  -2  -3  290.17   33.50
 -12  -2   3  296.97   30.50
  12  -2  -3  271.57   31.40
 -12  -2   3  294.87   31.80
 -12   2   3  284.57   31.10
  12   2  -3  220.08   30.50
 -12   2   3  303.97   31.10
  12   2  -3  259.47   32.20
 -12   2   3  296.57   34.00
 -11  -2   3   40.60    6.90
 -11  -2   3   36.10    9.10
  11  -2  -3   42.80    8.70
  11  -2  -3   48.20   10.50
 -11   2   3   56.39   12.10
  11   2  -3   24.10    9.80
  11   2  -3   21.50    6.40
 -11   2   3   46.20    7.80
 -11   2   3   44.90    7.20
  10  -2  -3   90.79   13.70
 -10  -2   3   98.49   11.50
  10  -2  -3   90.39   11.90
 -10  -2   3   87.49   12.10
 -10   2   3   84.99   10.90
  10   2  -3   96.29   12.90
 -10   2   3   79.99   14.90
  10   2  -3   58.89    9.90
 -10   2   3   94.29   11.20
   9  -2  -3   52.59   10.40
  -9  -2   3   56.59    7.30
  -9  -2   3   48.30    8.70
   9  -2  -3   38.30    8.40
  -9   2   3   40.40   11.50
   9   2  -3   41.00    9.40
   9   2  -3   32.40    6.10
  -9   2   3   47.30    7.30
  -9   2   3   46.50    7.70
   8  -2  -3  219.98   22.90
  -8  -2   3  177.18   20.50
  -8  -2   3  151.48   21.20
   8  -2  -3  179.98   20.80
  -8   2   3  171.28   20.90
  -8   2   3  163.18   23.50
  -8   2   3  182.68   20.50
   8   2  -3  178.88   21.30
  -7  -2   3  342.87   35.70
   7  -2  -3  330.27   35.80
   7  -2  -3  349.07   37.40
  -7   2   3  321.07   35.60
   7   2  -3  315.77   36.10
  -7   2   3  323.57   35.90
  -7   2   3  305.77   37.20
  -6  -2   3  540.15   55.09
   6  -2  -3  508.45   56.09
   6  -2  -3  514.05   55.09
  -6   2   3  494.15   55.19
  -6   2   3  504.45   56.49
   6   2  -3  522.75   55.29
   6   2  -3  511.05   55.49
  -6   2   3  501.65   54.99
   5  -2  -3   45.90    9.10
  -5  -2   3   41.70    7.40
   5  -2  -3   49.00    7.40
  -5   2   3   49.99    9.90
  -5   2   3   58.29    7.20
   5   2  -3   62.59    8.30
  -5   2   3   49.40    7.50
   5   2  -3   64.29    8.50
  -4  -2   3  564.04   58.39
   4  -2  -3  551.14   58.19
   4  -2  -3  521.05   59.09
   4   2  -3  569.44   58.49
  -4   2   3  550.14   58.19
  -4   2   3  538.25   58.39
  -4   2   3  544.55   59.39
   4   2  -3  513.65   58.59
  -3  -2   3 1754.72  210.58
   3  -2  -3 1980.00  210.68
   3  -2  -3 2137.59  211.58
   3  -2  -3 2040.50  211.28
  -3  -2   3 2012.70  210.58
  -3  -2   3 2042.10  210.88
   3   2  -3 2082.09  210.88
   3   2  -3 1975.20  211.08
  -3   2   3 2017.30  211.28
   3   2  -3 1860.71  210.58
  -3   2   3 1904.41  210.68
  -3   2   3 2019.80  210.88
   2  -2  -3 9152.88 1000.20
  -2  -2   3 9552.24 1000.40
  -2  -2   3 8549.84 1000.40
   2  -2  -3 9900.71 1000.80
  -2  -2   3 9605.54 1000.50
   2  -2  -3 9549.54 1000.90
  -2   2   3 9294.17 1000.40
  -2   2   3 9314.97 1000.30
   2   2  -3 9485.35 1000.50
  -2   2   3 9407.76 1000.70
   2   2  -3 9341.77 1000.70
   2   2  -3 9999.00 1000.50
   1  -2  -3 1321.47  143.59
  -1  -2   3 1358.86  144.09
  -1  -2   3 1360.96  143.99
   1  -2  -3 1343.77  144.49
   1  -2  -3 1385.16  144.39
  -1   2   3 1340.87  143.79
  -1   2   3 1294.97  143.89
  -1   2   3 1369.06  144.19
   1   2  -3 1347.77  143.99
   1   2  -3 1410.26  144.39
   0  -2   3 1907.01  192.58
   0  -2  -3 1592.74  192.48
   0  -2  -3 1938.31  192.78
   0  -2   3 1805.92  192.58
   0  -2  -3 1865.91  192.88
   0   2   3 1737.23  192.28
   0   2   3 1767.52  192.38
   0   2  -3 1888.01  192.48
   0   2   3 1760.52  192.48
   0   2  -3 1850.71  192.88
   1  -2   3  299.97   33.00
  -1  -2  -3  300.27   33.50
  -1  -2  -3  318.17   33.40
   1  -2   3  317.87   33.30
  -1   2  -3  306.67   33.00
   1   2   3  305.87   32.70
   1   2   3  280.97   32.50
  -1   2  -3  310.27   33.70
  -1   2  -3  288.77   33.10
  -2  -2  -3  128.89   15.30
   2  -2   3  138.09   14.80
   2  -2   3  119.89   14.00
  -2  -2  -3  105.99   12.60
  -2   2  -3  148.39   14.10
  -2   2  -3  133.89   15.40
   2   2   3  102.59   12.70
  -2   2  -3  114.09   14.10
  -3  -2  -3  425.86   46.10
   3  -2   3  439.26   46.00
   3  -2   3  414.26   45.60
  -3  -2  -3  387.76   45.00
  -3   2  -3  445.16   46.40
  -3   2  -3  440.96   45.50
   3   2   3  420.16   45.00
  -3   2  -3  417.06   45.50
  -4  -2  -3  403.16   48.80
   4  -2   3  480.65   49.10
   4  -2   3  448.56   48.50
   4   2   3  461.35   48.00
  -4   2  -3  458.55   48.40
  -4   2  -3  447.26   49.40
  -4   2  -3  447.06   48.40
  -5  -2  -3    8.60    6.30
   5  -2   3   -1.70    5.80
  -5  -2  -3    7.80    4.10
  -5   2  -3    6.70    4.20
   5   2   3    3.60    2.50
   5   2   3    0.10    3.30
  -5   2  -3   -1.60    3.90
  -5   2  -3    1.30    5.80
  -6  -2  -3  497.85   62.89
   6  -2   3  630.64   63.29
  -6  -2  -3  647.64   62.29
  -6   2  -3  595.84   62.29
   6   2   3  613.24   62.09
  -6   2  -3  592.04   62.29
   6   2   3  504.55   61.99
  -6   2  -3  586.84   63.49
   7  -2   3  172.28   19.30
  -7  -2  -3  144.19   17.40
  -7  -2  -3  131.79   19.00
  -7   2  -3  150.38   17.10
  -7   2  -3  144.39   19.60
   7   2   3  142.79   17.90
   7   2   3  151.88   17.10
  -7   2  -3  139.19   17.20
  -8  -2  -3  759.52   83.39
  -8  -2  -3  769.92   82.59
   8  -2   3  769.02   83.69
   8   2   3  782.22   82.89
  -8   2  -3  771.22   82.59
  -8   2  -3  805.12   83.89
  -8   2  -3  732.73   82.39
   8   2   3  782.52   82.49
   9  -2   3  124.39   17.30
  -9  -2  -3  121.89   17.70
  -9  -2  -3  134.19   15.90
  -9   2  -3  135.59   15.40
   9   2   3  130.59   15.90
   9   2   3  120.49   16.70
  -9   2  -3  146.79   18.30
  -9   2  -3  120.59   15.70
 -10  -2  -3  277.57   30.60
 -10  -2  -3  204.78   31.00
  10  -2   3  283.47   32.00
  10   2   3  300.07   31.10
 -10   2  -3  270.57   29.70
  10   2   3  296.37   30.50
 -10   2  -3  277.37   30.10
 -10   2  -3  269.17   32.40
  11  -2   3   31.80    8.50
 -11  -2  -3   22.90    7.90
  11  -2   3   41.80    9.80
  11   2   3   46.90    8.50
  11   2   3   31.40    8.00
 -11   2  -3   28.40    5.90
 -11   2  -3   18.50   10.20
 -11   2  -3   27.30    6.60
 -12  -2  -3   29.30    7.80
  12  -2   3    9.50    9.20
  12  -2   3   -2.90    7.70
 -12   2  -3    8.10    5.80
 -12   2  -3   10.00    5.10
  12   2   3   17.10    8.20
  12   2   3    6.80    7.30
 -12   2  -3   13.50   10.60
  13  -2   3   82.39   14.90
  13  -2   3   71.69   13.00
 -13  -2  -3   68.49   12.80
 -13   2  -3   95.39   11.10
 -13   2  -3  109.29   17.10
  13   2   3   80.49   13.40
 -13   2  -3   70.39   11.70
  13   2   3   99.59   13.90
  14  -2   3   20.00    9.60
  14  -2   3   15.90   10.70
 -14  -2  -3    1.40    8.50
 -14   2  -3   13.00    5.80
 -14   2  -3    4.70   12.20
  14   2   3    3.50    9.60
  14   2   3  -10.50    8.30
 -14   2  -3    6.20    6.90
 -15  -2  -3   -2.30    9.10
  15  -2   3    2.90   11.30
  15  -2   3   -1.30    9.10
  15   2   3    6.30   10.80
 -15   2  -3    9.90   13.40
 -15   2  -3   -3.10    6.90
  15   2   3   -4.40    9.10
 -15   2  -3   -3.50    7.50
 -16  -2  -3  150.88   19.70
  16  -2   3  138.49   22.80
  16  -2   3  163.08   20.70
  16   2   3  162.48   21.70
 -16   2  -3  183.48   26.40
 -16   2  -3  130.99   19.00
  16   2   3  130.69   21.20
  17  -2   3  211.28   28.50
  17  -2   3  132.99   25.00
 -17  -2  -3  219.68   24.90
  17   2   3  236.68   26.30
 -17   2  -3  192.38   30.90
 -17   2  -3  183.48   24.00
  17   2   3  194.78   26.80
  18  -2   3  257.97   34.90
 -18  -2  -3  284.57   34.70
  18  -2   3  295.97   39.00
 -18   2  -3  376.96   43.40
  18   2   3  295.47   36.80
 -18   2  -3  259.67   34.10
  19  -2   3    0.40   11.40
 -19  -2  -3    4.80   11.30
  19  -2   3   -8.40   15.20
 -19   2  -3    7.40   10.20
 -19   2  -3    8.90   22.50
  19   2   3    7.50   15.50
 -20  -2  -3  321.37   45.10
  20  -2   3  425.86   50.19
 -20   2  -3  470.75   54.39
 -20   2  -3  358.36   45.00
  20   2   3  409.36   47.60
 -21  -2  -3   35.40   13.70
  21  -2   3   40.20   15.30
  21  -2   3   50.49   20.00
 -21   2  -3   33.10   27.70
 -21   2  -3   37.90   13.80
  21   2   3   52.29   18.20
  22  -2   3   20.40   14.40
  22  -2   3   39.20   20.20
 -22  -2  -3   16.20   13.40
 -22   2  -3    7.60   13.30
 -22   2  -3   68.09   28.00
  22   2   3   39.10   20.50
  23  -2   3   -3.20   21.20
  23  -2   3   -7.80   16.50
 -23  -2  -3   20.70   14.20
  23   2   3  -20.50   19.80
 -23   2  -3  -11.60   14.40
  24  -2   3   -2.60   15.10
  24  -2   3  -18.00   22.10
 -24  -2  -3    7.30   14.50
  24   2   3    4.30   22.40
 -24   2  -3    2.00   15.10
 -25  -3   3  101.79   19.50
  25  -3  -3   41.00   18.90
  25  -3  -3   19.40   27.10
  25   3  -3  142.69   27.10
 -25   3   3   98.39   19.90
  24  -3  -3  -20.30   23.50
 -24  -3   3   17.90   15.90
  24  -3  -3  -13.80   15.20
 -24   3   3   10.70   15.90
  24   3  -3    8.20   23.60
 -23  -3   3   22.00   15.90
  23  -3  -3    3.30   21.20
  23  -3  -3   22.20   16.00
 -23   3   3   35.10   17.10
  23   3  -3   69.79   21.80
  22  -3  -3   -0.30   14.20
 -22  -3   3   29.50   14.80
  22  -3  -3  -10.20   21.70
 -22   3   3   -6.20   14.10
  22   3  -3   27.70   19.20
  21  -3  -3   19.40   14.10
  21  -3  -3   -6.10   19.50
 -21  -3   3    8.60   14.30
  21   3  -3    8.60   17.70
 -21   3   3    7.40   12.50
  20  -3  -3  -11.00   19.30
  20  -3  -3   -7.30   12.90
 -20  -3   3    2.90   13.40
  20   3  -3    9.00   16.80
 -20   3   3    1.40   11.90
 -20   3   3   -6.80   11.80
  19  -3  -3  198.68   26.50
 -19  -3   3  181.38   25.80
  19  -3  -3  116.59   29.80
 -19   3   3  216.08   25.40
  19   3  -3  184.68   28.50
 -19   3   3  248.38   35.30
 -19   3   3  205.18   25.30
  18  -3  -3    6.70   16.00
 -18  -3   3   34.60   13.00
  18  -3  -3   26.10   13.00
 -18   3   3   29.00   11.00
 -18   3   3   28.50   21.10
  18   3  -3   58.19   15.80
 -18   3   3   19.50   10.90
 -17  -3   3  155.38   21.40
  17  -3  -3  161.18   21.60
  17  -3  -3  115.19   24.50
 -17   3   3  128.19   27.40
 -17   3   3  150.58   20.10
 -17   3   3  185.68   21.20
  17   3  -3  138.79   23.30
 -16  -3   3   32.30   12.00
  16  -3  -3   17.60   15.40
  16  -3  -3   16.80   11.20
 -16   3   3   42.60   10.00
 -16   3   3   41.90   10.30
  16   3  -3   -6.60   13.70
 -16   3   3   37.30   18.10
  15  -3  -3   34.00   15.00
 -15  -3   3   38.60   11.70
  15  -3  -3   44.00   11.30
 -15   3   3   48.70   10.20
 -15   3   3   38.00    9.50
 -15   3   3   37.30   16.80
  15   3  -3   24.80   13.10
  14  -3  -3  222.08   27.10
 -14  -3   3  198.08   27.40
  14  -3  -3  179.28   28.70
 -14   3   3  226.58   26.50
  14   3  -3  234.78   28.00
 -14   3   3  250.67   26.60
 -14   3   3  236.78   31.40
  13  -3  -3   14.70    8.70
 -13  -3   3    8.70    9.30
  13  -3  -3    1.60   11.40
 -13   3   3    9.80    7.80
 -13   3   3   16.40    7.00
 -13   3   3   13.50   13.30
  13   3  -3   34.20   10.70
 -12  -3   3  140.99   16.70
  12  -3  -3  145.49   20.20
  12  -3  -3  139.99   17.90
  12   3  -3  123.89   18.50
 -12   3   3  129.69   16.80
 -12   3   3  112.59   20.60
 -12   3   3  142.89   17.90
 -11  -3   3  168.48   18.40
  11  -3  -3  126.69   20.60
  11  -3  -3  147.19   19.10
 -11   3   3  149.49   21.80
  11   3  -3  134.99   19.70
  11   3  -3  154.68   19.90
 -11   3   3  166.08   19.20
 -11   3   3  154.98   18.70
  10  -3  -3  240.58   25.20
  10  -3  -3  205.18   27.60
 -10  -3   3  216.48   24.50
  10   3  -3  214.38   26.10
 -10   3   3  207.38   28.30
 -10   3   3  218.28   24.80
  10   3  -3  208.08   25.90
 -10   3   3  209.08   25.10
   9  -3  -3   53.19    9.40
   9  -3  -3   62.39   12.40
  -9  -3   3   50.99    8.40
   9   3  -3   63.59   10.60
  -9   3   3   57.89    8.40
  -9   3   3   55.59    9.10
  -9   3   3   36.60   12.10
   9   3  -3   49.80   10.10
  -8  -3   3  334.37   35.30
   8  -3  -3  304.47   37.40
   8  -3  -3  338.47   35.60
  -8   3   3  330.07   35.30
   8   3  -3  304.97   36.00
   8   3  -3  296.87   35.90
  -8   3   3  316.57   35.60
  -8   3   3  332.57   37.90
   7  -3  -3  350.66   39.00
  -7  -3   3  342.37   36.70
   7  -3  -3  348.37   36.60
  -7   3   3  322.67   36.50
   7   3  -3  309.27   37.20
  -7   3   3  336.67   37.00
  -7   3   3  333.77   38.90
   7   3  -3  329.87   37.00
   6  -3  -3   62.39    9.10
   6  -3  -3   78.29   11.90
  -6  -3   3   57.89    8.90
  -6   3   3   50.49    8.40
  -6   3   3   44.60    9.00
   6   3  -3   57.99    9.50
   6   3  -3   74.89   10.10
  -6   3   3   61.49   11.70
   5  -3  -3  791.72   81.59
  -5  -3   3  775.82   80.59
   5  -3  -3  756.52   80.29
   5   3  -3  672.03   80.69
  -5   3   3  751.02   81.49
  -5   3   3  740.33   80.29
  -5   3   3  760.12   80.59
   5   3  -3  765.12   80.39
  -4  -3   3  199.28   23.20
   4  -3  -3  218.08   22.60
  -4  -3   3  208.68   22.20
   4  -3  -3  219.68   25.00
  -4  -3   3  193.08   22.40
  -4   3   3  212.38   24.50
  -4   3   3  217.28   23.50
   4   3  -3  173.48   22.20
  -4   3   3  229.28   22.70
   4   3  -3  212.18   23.20
   4   3  -3  183.78   23.90
  -3  -3   3 1947.61  210.18
   3  -3  -3 2051.39  210.98
   3  -3  -3 2027.90  210.68
  -3  -3   3 1985.40  209.98
   3   3  -3 2067.49  210.08
   3   3  -3 1783.52  210.28
  -3   3   3 1930.71  210.58
  -3   3   3 1957.90  210.18
  -3   3   3 2026.50  209.98
  -2  -3   3  731.53   77.99
   2  -3  -3  744.63   78.69
   2  -3  -3  729.63   78.99
  -2  -3   3  759.42   77.89
  -2   3   3  697.13   77.69
  -2   3   3  705.93   78.39
  -2   3   3  730.63   77.99
   2   3  -3  684.63   78.29
   2   3  -3  761.12   77.99
   1  -3  -3   20.40    8.40
  -1  -3   3   14.90    5.30
  -1  -3   3   15.50    5.40
   1  -3  -3   13.70    6.90
  -1   3   3   11.90    5.00
  -1   3   3    6.20    4.50
   1   3  -3    9.80    6.70
  -1   3   3   14.60    5.70
   1   3  -3    3.10    5.60
   0  -3  -3   22.90    8.40
   0  -3   3   30.30    6.40
   0  -3  -3   24.20    7.80
   0  -3  -3   30.50    4.80
   0  -3   3   35.60    6.70
   0   3   3   33.30    6.20
   0   3  -3   31.40    7.80
   0   3   3   32.80    6.30
   0   3  -3   31.80    6.70
   0   3   3   27.80    5.70
   0   3  -3   43.60    6.40
   1  -3   3  174.78   18.80
  -1  -3  -3  154.98   19.70
  -1  -3  -3  147.19   16.80
  -1  -3  -3  145.99   19.30
   1  -3   3  171.88   18.40
  -1   3  -3  148.89   19.50
  -1   3  -3  165.78   18.30
  -1   3  -3  147.29   18.50
   1   3   3  165.58   18.20
   1   3   3  137.29   17.70
  -2  -3  -3    7.60    2.70
  -2  -3  -3    1.20    4.10
  -2  -3  -3    8.80    6.50
  -2  -3  -3    6.40    7.30
   2  -3   3   10.20    6.30
   2   3   3   12.50    3.00
  -2   3  -3    2.10    5.00
  -2   3  -3   -1.70    6.80
   2   3   3    3.40    3.70
  -2   3  -3   13.10    5.70
  -3  -3  -3    8.80    4.60
   3  -3   3   11.20    6.70
  -3  -3  -3   12.00    7.50
  -3  -3  -3    6.00    3.20
   3   3   3   23.00    3.30
   3   3   3    4.80    3.00
  -3   3  -3    2.60    7.40
  -3   3  -3    5.20    5.40
  -3   3  -3   -1.50    5.30
   4  -3   3    6.90    6.90
  -4  -3  -3   14.30    7.00
  -4   3  -3   10.90    5.50
  -4   3  -3   -3.30    5.20
   4   3   3    8.60    3.60
  -4   3  -3   -3.20    7.50
  -5  -3  -3   28.90    8.30
   5  -3   3   20.30    8.00
  -5   3  -3   17.70    8.30
   5   3   3   23.50    5.00
  -5   3  -3   14.80    6.10
  -5   3  -3   34.60    6.50
  -6  -3  -3  158.68   20.60
   6  -3   3  171.88   22.00
  -6   3  -3  169.98   19.90
   6   3   3  171.58   19.00
  -6   3  -3  172.08   19.70
  -6   3  -3  152.48   22.00
  -7  -3  -3  160.78   22.20
   7  -3   3  217.08   23.60
  -7   3  -3  180.48   21.30
   7   3   3  195.78   20.70
  -7   3  -3  187.08   22.90
   7   3   3  160.28   19.80
   7   3   3  188.78   20.00
  -7   3  -3  200.18   21.20
   8  -3   3   58.79   11.50
  -8  -3  -3   72.99   11.50
   8   3   3   58.19    8.00
  -8   3  -3   55.19    9.00
   8   3   3   67.69    9.30
  -8   3  -3   60.49   12.40
  -8   3  -3   63.99    9.20
  -9  -3  -3  355.56   45.90
   9  -3   3  388.76   46.80
   9   3   3  421.16   45.10
   9   3   3  427.76   45.50
  -9   3  -3  438.46   47.20
  -9   3  -3  435.66   45.10
  -9   3  -3  427.06   45.10
  10  -3   3   13.60    8.80
 -10  -3  -3    3.90    6.80
 -10  -3  -3    5.30    8.30
 -10   3  -3   -0.60    9.10
  10   3   3   11.70    6.90
 -10   3  -3   10.60    5.60
  10   3   3   14.40    6.70
 -10   3  -3    1.00    5.50
 -11  -3  -3  130.69   21.20
  11  -3   3  160.78   21.90
 -11  -3  -3  160.78   20.20
  11   3   3  180.08   20.10
 -11   3  -3  176.58   22.90
  11   3   3  147.79   20.40
 -11   3  -3  175.68   19.50
 -11   3  -3  165.88   19.70
 -12  -3  -3   13.90    8.70
  12  -3   3   27.20    9.40
  12  -3   3   25.90   10.80
  12   3   3   29.90    8.60
  12   3   3   14.90    9.10
 -12   3  -3   35.20    6.90
 -12   3  -3   24.70    7.20
 -12   3  -3   19.90   12.10
  13  -3   3   55.59   14.10
  13  -3   3   85.59   12.80
 -13  -3  -3   52.29   11.70
 -13   3  -3   44.60   15.50
  13   3   3   54.29   11.60
  13   3   3   89.19   13.10
 -13   3  -3   68.49   10.50
 -13   3  -3   65.09   10.00
  14  -3   3   33.90   13.30
  14  -3   3   23.20   10.50
 -14  -3  -3   23.70   10.40
 -14   3  -3   42.70    8.10
 -14   3  -3   42.20   14.00
  14   3   3   32.60   11.60
 -14   3  -3   31.60    8.50
  14   3   3   31.50   10.60
 -15  -3  -3  118.79   18.80
  15  -3   3  133.69   21.60
  15  -3   3  143.69   19.20
  15   3   3  158.08   20.50
  15   3   3  121.39   19.10
 -15   3  -3  152.48   24.90
 -15   3  -3  136.79   17.60
 -15   3  -3  133.69   17.90
 -16  -3  -3    1.40   10.50
  16  -3   3    8.60   14.10
  16  -3   3   12.40   10.70
 -16   3  -3   22.60    9.30
 -16   3  -3   22.40   18.30
  16   3   3   20.10   13.30
 -16   3  -3   19.80    9.10
  17  -3   3  156.88   25.60
 -17  -3  -3  143.19   20.80
  17  -3   3  122.39   20.60
 -17   3  -3  176.68   20.70
 -17   3  -3  151.58   28.50
  17   3   3  138.89   22.80
  18  -3   3   22.50   17.80
  18  -3   3   42.20   12.80
 -18  -3  -3   35.60   13.30
 -18   3  -3   57.29   23.60
 -18   3  -3   32.70   12.00
  18   3   3   23.30   15.90
  19  -3   3    5.20   11.80
  19  -3   3   -6.50   18.10
 -19  -3  -3   -5.50   12.20
 -19   3  -3   -2.20   22.60
  19   3   3   14.00   16.60
 -19   3  -3    4.00   11.20
  20  -3   3  -15.70   16.40
 -20  -3  -3    9.40   13.10
  20  -3   3    9.40   15.00
 -20   3  -3   -4.20   12.10
  20   3   3   -5.50   17.50
 -20   3  -3  -19.80   24.50
 -21  -3  -3  -10.70   13.30
  21  -3   3   26.00   14.50
  21  -3   3   -9.80   19.20
  21   3   3    5.80   18.00
 -21   3  -3    7.50   12.80
 -21   3  -3   23.70   27.70
 -22  -3  -3   -3.20   13.70
  22  -3   3  -20.00   20.50
  22  -3   3    4.40   14.00
 -22   3  -3  -21.20   13.40
 -22   3  -3   47.00   29.80
  22   3   3    6.60   19.70
  23  -3   3  -22.10   22.70
 -23  -3  -3    6.10   14.30
 -23   3  -3   39.00   31.10
 -23   3  -3   -1.70   13.70
  24  -4  -3    1.80   16.70
  24  -4  -3  -29.30   23.10
 -24   4   3    8.40   17.20
  24   4  -3   63.89   24.10
  23  -4  -3   32.50   17.70
  23  -4  -3   17.90   25.60
  23   4  -3   71.59   24.10
 -23   4   3   95.19   20.60
  22  -4  -3   -9.80   21.50
  22  -4  -3   -6.10   15.30
  22   4  -3   25.80   22.20
 -22   4   3  -17.20   14.00
  21  -4  -3   60.79   16.70
  21  -4  -3   39.00   24.50
 -21   4   3   39.30   15.10
  21   4  -3   68.09   21.90
 -21   4   3   90.29   31.30
  20  -4  -3    0.40   18.40
  20  -4  -3    0.80   13.60
  20   4  -3   53.59   20.50
 -20   4   3   41.00   15.80
 -20   4   3   32.30   14.50
 -20   4   3   31.90   26.70
  19  -4  -3   50.09   15.90
  19  -4  -3   50.29   22.30
 -19   4   3   69.69   15.70
 -19   4   3   75.19   16.00
  19   4  -3  120.49   22.10
 -19   4   3  100.89   27.60
  18  -4  -3   29.20   13.80
  18  -4  -3   31.40   20.30
 -18   4   3   40.60   24.30
 -18   4   3   52.19   13.80
 -18   4   3   82.19   13.90
  18   4  -3   72.49   18.70
  17  -4  -3    9.50   18.10
  17  -4  -3   17.70   12.20
  17   4  -3   49.40   17.10
 -17   4   3   24.80   12.20
 -17   4   3   24.90   21.60
 -17   4   3   20.30   11.10
  16  -4  -3   37.60   18.80
  16  -4  -3   35.50   13.20
 -16   4   3   63.99   12.30
  16   4  -3   52.39   16.90
 -16   4   3   60.49   21.20
 -16   4   3   67.69   13.00
  15  -4  -3   -7.40   15.20
  15  -4  -3   -9.10   10.90
 -15   4   3   -3.40   16.90
 -15   4   3   -4.70    9.70
 -15   4   3    5.00    9.00
  15   4  -3    5.90   12.90
  15   4  -3    5.90   13.10
  14  -4  -3  -11.80   13.30
  14  -4  -3   24.80   10.30
 -14   4   3   -3.90    8.10
  14   4  -3    1.70   11.80
  14   4  -3    1.70   12.40
 -14   4   3  -31.80   14.60
 -14   4   3   -5.60    9.20
  13  -4  -3   48.80   11.10
  13  -4  -3   40.90   14.70
  13   4  -3   27.10   13.60
 -13   4   3   41.50   10.40
  13   4  -3   50.79   12.70
 -13   4   3   45.00    9.80
 -13   4   3   43.70   16.80
  12  -4  -3   18.90    9.20
  12  -4  -3   -3.80   11.90
 -12   4   3    0.90    8.60
 -12   4   3    2.40   13.70
  12   4  -3    9.60   11.00
  12   4  -3   21.70   10.20
 -12   4   3   23.40    7.50
  11  -4  -3   29.60   13.10
  11  -4  -3   49.00   10.00
 -11   4   3   32.50   13.80
  11   4  -3   28.40   10.90
 -11   4   3   34.40    8.20
  11   4  -3   28.90   10.40
 -11   4   3   39.10    9.40
  10  -4  -3   22.60   11.90
  10  -4  -3   20.80    8.20
  10   4  -3   22.10    9.50
  10   4  -3   31.40    9.70
 -10   4   3   23.80    7.10
 -10   4   3   27.30   13.20
 -10   4   3   32.20    8.60
   9  -4  -3  858.31   87.99
   9  -4  -3  774.92   89.69
  -9   4   3  840.72   87.89
   9   4  -3  789.52   88.39
  -9   4   3  880.01   90.19
  -9   4   3  847.52   88.19
   9   4  -3  739.13   87.99
   8  -4  -3   57.09   13.80
   8  -4  -3   81.79   11.20
  -8  -4   3   67.69   10.80
   8   4  -3   84.09   11.60
  -8   4   3   75.89   14.70
  -8   4   3   71.49   10.30
   8   4  -3   74.69   12.10
  -8   4   3   69.69   11.10
   7  -4  -3  776.02   79.79
   7  -4  -3  721.63   81.59
  -7  -4   3  767.12   80.09
   7   4  -3  730.33   79.89
  -7   4   3  751.42   79.79
  -7   4   3  721.63   80.09
  -7   4   3  739.73   81.49
   7   4  -3  727.13   80.29
   6  -4  -3  222.28   27.70
  -6  -4   3  257.27   28.30
   6  -4  -3  268.07   31.10
  -6   4   3  242.78   27.80
  -6   4   3  282.27   30.40
  -6   4   3  245.58   28.50
   6   4  -3  238.18   28.70
   6   4  -3  240.88   28.10
  -5  -4   3  208.98   24.90
  -5  -4   3  215.78   25.20
  -5  -4   3  252.17   26.20
   5  -4  -3  245.48   28.90
   5   4  -3  226.78   25.80
   5   4  -3  240.08   26.80
  -5   4   3  214.98   26.30
  -5   4   3  238.18   27.80
  -5   4   3  231.18   25.50
   4  -4  -3   35.00   10.40
  -4  -4   3   10.20    6.20
  -4  -4   3   17.30    6.10
   4  -4  -3   44.60   14.30
  -4  -4   3   24.30    6.90
   4   4  -3   25.60    7.30
  -4   4   3   26.90    6.10
  -4   4   3   23.30    9.20
   4   4  -3   26.50    8.10
  -4   4   3   32.70    7.30
   3  -4  -3  195.28   24.20
   3  -4  -3  239.18   27.10
  -3  -4   3  181.08   22.20
  -3   4   3  175.58   21.50
  -3   4   3  181.38   23.50
   3   4  -3  186.08   23.20
  -3   4   3  184.08   22.60
   3   4  -3  183.48   22.00
  -2  -4   3  243.38   24.80
   2  -4  -3  231.68   26.40
   2  -4  -3  218.58   27.00
  -2   4   3  204.18   23.90
   2   4  -3  226.28   24.40
  -2   4   3  185.08   24.60
  -2   4   3  183.58   25.10
   2   4  -3  194.88   25.30
   1  -4  -3  495.25   55.19
  -1  -4   3  521.85   54.19
   1  -4  -3  494.05   54.89
  -1   4   3  504.85   53.99
  -1   4   3  466.05   54.19
   1   4  -3  494.45   54.09
   1   4  -3  486.65   54.79
  -1   4   3  496.25   53.49
   0  -4   3   22.10    7.30
   0  -4  -3    7.60    8.70
   0  -4  -3    5.90   10.50
   0   4  -3    8.60    6.60
   0   4  -3    3.90    7.90
   0   4   3   11.90    6.50
   0   4  -3   -1.30    6.00
   0   4   3    5.20    5.60
   0   4   3   10.20    6.10
   1  -4   3  375.56   38.00
  -1  -4  -3  327.17   38.50
  -1  -4  -3  334.27   37.80
   1   4   3  308.07   36.70
  -1   4  -3  326.67   36.90
   1   4   3  347.47   37.10
  -1   4  -3  339.87   37.30
  -1   4  -3  314.07   38.00
   2  -4   3   68.59   11.10
  -2  -4  -3   70.69   11.30
  -2  -4  -3   65.89   12.10
  -2   4  -3   69.39   12.00
   2   4   3   63.99    9.70
  -2   4  -3   60.39   10.00
  -2   4  -3   58.39   10.10
   2   4   3   52.19    8.90
  -3  -4  -3  160.68   20.40
   3  -4   3  165.58   20.80
   3   4   3  133.89   17.90
  -3   4  -3  155.68   20.80
  -3   4  -3  143.09   19.40
   3   4   3  170.68   17.40
  -3   4  -3  158.18   19.10
  -4  -4  -3    9.00    8.10
   4  -4   3   15.10    8.30
  -4   4  -3    6.60    6.30
  -4   4  -3   12.30    6.50
   4   4   3   18.40    4.20
   4   4   3    3.40    3.90
  -4   4  -3   16.40    8.20
  -5  -4  -3  140.19   19.30
   5  -4   3  155.28   21.10
   5   4   3  171.38   17.20
  -5   4  -3  161.68   18.80
  -5   4  -3  165.98   19.20
  -5   4  -3  156.38   21.20
   5   4   3  134.69   16.80
  -6  -4  -3   37.30    9.20
   6  -4   3    3.30    8.60
   6   4   3   47.50    5.80
  -6   4  -3   20.20    7.30
  -6   4  -3   28.70    7.20
  -6   4  -3   22.70    9.90
  -7  -4  -3   75.29   12.50
   7  -4   3   83.39   13.80
  -7   4  -3   43.40   12.80
  -7   4  -3   95.69   11.40
   7   4   3   82.59   10.30
  -7   4  -3   81.29   11.50
  -8  -4  -3   74.29   12.50
   8  -4   3   61.59   13.10
  -8   4  -3   58.99   13.10
   8   4   3   86.49   10.50
  -8   4  -3   90.99   11.20
  -8   4  -3   60.49   10.80
  -9  -4  -3  110.59   18.10
   9  -4   3  136.19   19.20
  -9   4  -3  142.59   16.80
   9   4   3  144.19   17.10
  -9   4  -3  121.49   19.10
  -9   4  -3  139.29   17.50
 -10  -4  -3  164.68   22.60
  10  -4   3  173.28   24.30
  10   4   3  196.98   21.60
  10   4   3  144.29   21.30
 -10   4  -3  166.08   20.90
 -10   4  -3  186.98   24.40
 -10   4  -3  185.18   21.50
  11  -4   3  583.34   68.49
 -11  -4  -3  558.24   66.99
  11   4   3  646.44   66.59
  11   4   3  622.24   66.69
 -11   4  -3  641.04   66.39
 -11   4  -3  647.24   69.29
 -11   4  -3  583.04   66.29
 -12  -4  -3   -1.20    8.90
  12  -4   3   10.20   11.30
 -12   4  -3   -7.40   12.70
 -12   4  -3    1.20    7.70
  12   4   3   27.50   10.40
 -12   4  -3   17.20    7.40
  12   4   3   -3.30    8.10
  13  -4   3  509.15   63.59
  13  -4   3  543.45   61.39
 -13   4  -3  551.34   64.89
  13   4   3  551.34   61.79
 -13   4  -3  551.64   61.09
 -13   4  -3  612.24   60.99
  14  -4   3   13.70   11.10
  14  -4   3    5.40   13.40
  14   4   3   60.49   12.60
 -14   4  -3   20.00   16.40
 -14   4  -3   14.10    8.90
 -14   4  -3   15.80    8.60
  15  -4   3   81.29   16.00
  15  -4   3   81.49   19.90
 -15   4  -3  101.99   15.10
 -15   4  -3  107.59   14.80
  15   4   3  106.09   18.40
 -15   4  -3   98.39   23.80
  16  -4   3   17.40   16.50
  16  -4   3   25.40   12.60
 -16   4  -3   68.39   21.30
 -16   4  -3   60.69   11.80
 -16   4  -3   58.19   10.90
  16   4   3   42.50   15.30
  17  -4   3   16.10   12.00
  17  -4   3   11.40   17.20
 -17   4  -3    2.10   22.50
 -17   4  -3    3.50   11.30
  17   4   3   39.70   15.90
  18  -4   3  -26.60   17.10
  18  -4   3   10.00   12.20
 -18   4  -3   -9.90   11.20
 -18   4  -3  -25.90   22.40
  19  -4   3    4.90   18.90
  19  -4   3   25.90   13.70
 -19   4  -3   60.09   28.00
 -19   4  -3   32.70   13.00
  20  -4   3   11.60   14.10
  20  -4   3  -21.10   21.00
 -20   4  -3    2.30   13.70
 -20   4  -3   24.70   28.20
  21  -4   3   -4.20   21.80
 -21   4  -3   16.50   30.10
 -21   4  -3   18.50   14.40
  22  -4   3  -11.40   14.40
  22  -4   3  -24.60   19.60
 -22   4  -3   -3.70   17.30
 -22   4  -3   24.70   33.10
  23  -5  -3  -35.70   21.40
  23  -5  -3    4.80   18.50
 -23   5   3    6.40   16.90
  22  -5  -3   74.69   21.90
  22  -5  -3   81.79   33.20
 -22   5   3   94.39   21.90
 -22   5   3  159.78   42.90
  21  -5  -3   51.99   27.10
  21  -5  -3   77.19   21.30
 -21   5   3  180.68   40.30
 -21   5   3   87.79   22.60
 -21   5   3  120.99   23.30
  21   5  -3  138.79   27.20
  20  -5  -3   57.69   24.40
  20  -5  -3   79.49   21.70
 -20   5   3  173.78   37.20
 -20   5   3  145.89   22.20
 -20   5   3  124.29   20.70
  20   5  -3  158.78   25.70
  19  -5  -3   50.89   25.40
  19  -5  -3  119.99   20.70
 -19   5   3   93.39   20.80
 -19   5   3  112.69   19.90
  19   5  -3  114.69   23.40
 -19   5   3  110.09   32.40
  18  -5  -3   26.40   23.30
  18  -5  -3   58.69   16.20
 -18   5   3   38.50   14.30
  18   5  -3   64.49   19.40
 -18   5   3   51.79   15.90
 -18   5   3   52.79   28.10
  17  -5  -3   32.70   14.40
  17  -5  -3   31.90   21.80
  17   5  -3   74.89   19.00
 -17   5   3   58.99   15.90
 -17   5   3   46.00   15.30
 -17   5   3   92.49   27.80
  16  -5  -3   -8.10   18.60
  16  -5  -3  -10.90   12.30
 -16   5   3   20.40   12.70
 -16   5   3    7.40   22.10
  16   5  -3    7.30   15.70
 -16   5   3    4.40   11.00
  15  -5  -3  162.68   23.80
  15  -5  -3  130.29   26.90
 -15   5   3  192.68   31.30
 -15   5   3  170.08   22.30
  15   5  -3  185.38   24.80
 -15   5   3  134.19   21.40
  14  -5  -3  117.09   23.70
  14  -5  -3  121.69   20.40
 -14   5   3  113.69   18.90
 -14   5   3  137.39   26.80
  14   5  -3  148.19   21.30
 -14   5   3  169.18   21.20
  13  -5  -3   51.79   13.80
  13  -5  -3   50.89   17.20
 -13   5   3   46.60   12.20
  13   5  -3   81.49   15.30
 -13   5   3   78.99   21.00
 -13   5   3   74.09   14.20
  12  -5  -3   33.40   11.20
  12  -5  -3   34.40   15.80
 -12   5   3   32.10   10.10
  12   5  -3   29.80   12.20
  12   5  -3   37.00   11.90
 -12   5   3   42.40   17.80
 -12   5   3   39.40   12.60
  11  -5  -3   33.10   15.50
  11  -5  -3   37.40   11.20
 -11   5   3   38.90   17.70
 -11   5   3   50.39   10.50
 -11   5   3   53.49   12.10
  11   5  -3   70.49   12.70
  11   5  -3   57.79   12.80
  10  -5  -3  582.94   57.99
  10  -5  -3  434.96   60.49
 -10   5   3  500.15   58.29
  10   5  -3  486.95   57.89
 -10   5   3  576.14   57.79
  10   5  -3  526.45   58.69
 -10   5   3  579.64   61.99
   9  -5  -3   10.50    8.50
   9  -5  -3   21.70   13.40
  -9   5   3   10.10    8.70
   9   5  -3   25.80    9.50
  -9   5   3   12.70   13.30
   9   5  -3   13.10    9.50
  -9   5   3   11.10    7.10
   8  -5  -3  175.38   23.30
   8  -5  -3  205.68   27.00
  -8   5   3  221.38   28.60
   8   5  -3  192.08   24.80
  -8   5   3  189.48   24.60
  -8   5   3  204.18   23.30
   8   5  -3  182.08   24.00
   7  -5  -3    6.40    7.40
   7  -5  -3   29.30   12.70
  -7   5   3   26.30    7.00
  -7   5   3   15.40    8.30
  -7   5   3    9.40   11.70
   7   5  -3   34.70    8.60
   7   5  -3    4.60    8.60
   6  -5  -3  143.49   22.20
  -6  -5   3  150.18   18.40
  -6   5   3  170.38   22.30
   6   5  -3  150.58   19.90
  -6   5   3  160.78   20.70
   6   5  -3  158.28   20.90
  -6   5   3  165.58   19.30
   5  -5  -3   31.60   17.50
  -5  -5   3   18.90    6.90
   5  -5  -3   26.70   12.10
  -5  -5   3   15.90    6.50
  -5   5   3   31.60    7.30
  -5   5   3   36.80    8.80
  -5   5   3   23.70   11.10
   5   5  -3   21.00    8.20
   5   5  -3   27.80    9.00
  -4  -5   3  121.59   18.90
   4  -5  -3  184.78   23.50
   4  -5  -3  143.09   21.30
  -4  -5   3  139.19   18.80
  -4   5   3  159.58   21.60
   4   5  -3  147.09   18.60
  -4   5   3  174.18   18.50
  -4   5   3  147.39   19.30
   4   5  -3  139.79   20.30
  -3  -5   3  136.49   22.80
   3  -5  -3  178.78   25.30
   3  -5  -3  203.48   28.10
  -3  -5   3  187.98   23.10
  -3   5   3  213.98   21.60
  -3   5   3  200.78   24.00
  -3   5   3  189.88   22.70
   3   5  -3  170.88   22.00
   3   5  -3  181.78   23.70
  -2  -5   3  285.67   33.10
   2  -5  -3  294.27   36.30
   2  -5  -3  266.27   34.40
  -2   5   3  279.07   33.30
  -2   5   3  322.97   32.10
  -2   5   3  284.27   32.80
   2   5  -3  279.27   33.90
   2   5  -3  261.97   32.70
   1  -5  -3  259.27   33.10
   1  -5  -3  252.37   32.90
  -1  -5   3  287.87   32.10
   1   5  -3  269.47   31.30
   1   5  -3  241.88   30.80
  -1   5   3  281.17   30.60
  -1   5   3  292.87   31.40
  -1   5   3  257.17   31.40
   1   5  -3  285.27   32.60
   0  -5  -3  196.78   26.40
   0  -5  -3  183.28   25.10
   0  -5   3  189.28   24.40
   0   5   3  203.48   23.50
   0   5  -3  199.08   22.80
   0   5   3  173.88   23.40
   0   5  -3  190.58   24.70
   0   5  -3  181.58   23.40
   0   5   3  195.78   22.50
  -1  -5  -3  357.46   41.50
   1  -5   3  355.16   41.50
  -1  -5  -3  384.26   42.10
  -1   5  -3  372.66   40.40
   1   5   3  368.46   40.60
  -1   5  -3  355.06   41.80
  -1   5  -3  361.16   40.70
   1   5   3  331.37   40.20
   1   5   3  376.26   39.90
   2  -5   3  173.88   22.80
  -2  -5  -3  195.48   23.20
  -2  -5  -3  168.38   22.60
  -2   5  -3  163.88   21.20
  -2   5  -3  154.98   21.40
   2   5   3  148.59   20.70
   2   5   3  171.38   21.30
  -2   5  -3  183.88   23.60
   3  -5   3    2.80    9.20
  -3  -5  -3    3.90    9.10
  -3  -5  -3   18.10    9.80
   3   5   3   12.60    7.40
   3   5   3    2.90    5.80
  -3   5  -3    3.80   10.00
  -3   5  -3   -4.20    6.90
  -3   5  -3    4.40    7.30
   4  -5   3   10.40    9.90
  -4  -5  -3   18.60   10.40
   4   5   3   12.00    7.40
  -4   5  -3    2.30    7.30
  -4   5  -3   11.20    7.40
   4   5   3    2.30    5.40
  -4   5  -3   11.20   10.30
  -5  -5  -3   42.00   11.30
   5  -5   3   54.49   12.60
   5   5   3   42.20    7.40
  -5   5  -3   45.20    9.50
  -5   5  -3   44.80    9.90
  -5   5  -3   47.20   12.80
   5   5   3   62.79    7.80
  -6  -5  -3   24.60    9.90
   6  -5   3    6.80   10.50
  -6   5  -3    8.00   10.90
  -6   5  -3   31.30    7.80
  -6   5  -3   12.20    8.40
   6   5   3   22.20    5.90
   7  -5   3  159.18   23.00
  -7  -5  -3  168.78   22.40
  -7   5  -3  164.18   24.00
  -7   5  -3  173.08   20.60
   7   5   3  157.08   19.50
  -7   5  -3  182.38   22.10
  -8  -5  -3   20.20    9.80
   8  -5   3   13.50   11.50
  -8   5  -3    3.80    8.90
   8   5   3   30.30    6.80
  -8   5  -3   14.20    7.60
  -8   5  -3   20.00   12.40
  -9  -5  -3   26.60   10.30
   9  -5   3   17.80   11.80
  -9   5  -3   19.20   13.20
  -9   5  -3   25.70    9.60
   9   5   3   23.30    7.80
  -9   5  -3   19.20    8.10
  10  -5   3   46.60   15.30
 -10  -5  -3   74.49   13.80
 -10   5  -3   82.09   17.40
 -10   5  -3   68.89   12.30
 -10   5  -3   92.49   13.90
  10   5   3   88.49   13.80
  11  -5   3   16.10   13.10
 -11   5  -3   41.70   11.20
 -11   5  -3   37.50   16.40
 -11   5  -3   26.10    9.10
  12  -5   3  322.47   46.50
 -12   5  -3  384.86   43.30
 -12   5  -3  403.36   48.20
 -12   5  -3  392.36   42.90
  13  -5   3   -0.10   13.80
 -13   5  -3   29.10   11.10
 -13   5  -3    8.10    9.40
 -13   5  -3   15.10   17.70
  14  -5   3   56.19   13.90
  14  -5   3   45.10   17.50
 -14   5  -3   38.30   12.10
 -14   5  -3   65.69   22.10
 -14   5  -3   63.89   13.10
  15  -5   3  -13.00   15.90
  15  -5   3    5.20   11.90
 -15   5  -3   19.80   21.30
 -15   5  -3    5.90   10.30
 -15   5  -3   10.70   10.40
  16  -5   3   -5.30   16.00
  16  -5   3    1.30   12.00
 -16   5  -3   -0.90   10.50
 -16   5  -3    7.60    9.90
 -16   5  -3    3.40   22.90
  17  -5   3   -9.60   18.80
  17  -5   3   22.20   13.30
 -17   5  -3  -11.80   24.50
 -17   5  -3    3.00   10.30
 -17   5  -3   -3.70   11.40
  18  -5   3   11.10   13.90
  18  -5   3  -16.70   17.00
 -18   5  -3   17.50   14.50
 -18   5  -3   -3.50   26.80
  19  -5   3   30.00   15.70
  19  -5   3   37.20   25.00
 -19   5  -3   70.49   33.30
 -19   5  -3   33.70   18.10
  20  -5   3   -1.40   15.70
  20  -5   3  -30.60   18.70
 -20   5  -3   -6.70   30.40
 -20   5  -3   -3.30   14.60
  21  -5   3  -42.00   21.60
 -21   5  -3   22.20   33.70
 -21   5  -3   10.20   17.80
  21  -6  -3  -38.00   22.30
 -21   6   3    4.10   20.60
 -21   6   3   11.30   35.60
 -21   6   3    2.40   18.60
  20  -6  -3  -14.40   20.60
 -20   6   3   29.00   33.90
 -20   6   3   38.00   23.90
 -20   6   3   39.90   16.90
  19  -6  -3   28.40   17.00
  19  -6  -3   -0.90   21.90
 -19   6   3   38.80   19.30
 -19   6   3   40.60   34.50
 -19   6   3   46.60   18.50
  18  -6  -3   39.90   16.40
  18  -6  -3   28.40   22.50
 -18   6   3   41.50   17.90
 -18   6   3   73.09   32.60
 -18   6   3   52.09   18.50
  17  -6  -3   19.10   14.20
  17  -6  -3    5.60   21.10
 -17   6   3   27.20   16.20
 -17   6   3   39.00   15.00
 -17   6   3   34.10   29.20
  16  -6  -3   -2.90   19.40
  16  -6  -3    0.30   13.30
 -16   6   3  -19.20   14.80
 -16   6   3   -4.10   13.70
 -16   6   3   35.40   26.80
  15  -6  -3    1.90   18.10
  15  -6  -3   16.50   13.30
 -15   6   3   41.60   16.80
 -15   6   3   37.30   15.90
 -15   6   3   62.49   26.70
  15   6  -3   31.20   16.90
  14  -6  -3   -1.50   12.80
  14  -6  -3   -5.30   18.60
  14   6  -3   13.80   13.80
 -14   6   3   22.90   12.90
 -14   6   3   17.80   22.70
 -14   6   3   44.80   15.60
  13  -6  -3  282.77   36.30
  13  -6  -3  270.57   40.20
  13   6  -3  264.07   35.60
 -13   6   3  296.37   42.40
 -13   6   3  323.37   37.30
 -13   6   3  332.17   36.70
  12  -6  -3   67.79   20.40
  12  -6  -3   92.39   16.60
 -12   6   3   77.39   16.10
 -12   6   3   64.39   23.10
  12   6  -3   87.29   16.20
 -12   6   3  132.49   18.80
  11  -6  -3  205.78   24.00
  11  -6  -3  153.98   27.80
 -11   6   3  201.18   24.40
  11   6  -3  161.98   22.60
 -11   6   3  143.99   22.60
 -11   6   3  153.88   28.90
  10  -6  -3  113.09   26.70
  10  -6  -3  201.88   23.30
 -10   6   3  152.98   22.50
  10   6  -3  197.58   22.90
 -10   6   3  182.38   23.80
 -10   6   3  188.18   29.40
   9  -6  -3   -2.00    9.90
   9  -6  -3  -13.00   15.00
   9   6  -3   13.80   10.20
   9   6  -3    7.10   10.70
  -9   6   3    6.10    9.30
  -9   6   3   10.90   11.40
  -9   6   3   14.80   17.00
   8  -6  -3    1.20   15.00
   8  -6  -3    3.40    9.50
  -8   6   3   13.50   11.10
   8   6  -3   -6.40    9.30
  -8   6   3    0.30   15.70
  -8   6   3    5.70    8.60
   8   6  -3    0.20   10.60
   7  -6  -3   23.80   16.10
   7  -6  -3   26.00   21.30
   7  -6  -3   72.99   11.20
  -7   6   3   76.29   11.40
   7   6  -3   56.19   13.10
   7   6  -3   45.20   11.90
  -7   6   3   44.70   12.60
  -7   6   3   59.09   17.60
   6  -6  -3  108.69   23.90
   6  -6  -3   80.29   19.50
  -6   6   3   92.79   16.30
   6   6  -3  118.29   15.20
  -6   6   3   98.29   19.20
  -6   6   3   95.89   14.90
   6   6  -3   99.49   16.70
   5  -6  -3   14.70   14.00
  -5  -6   3   16.00    8.90
   5  -6  -3    2.10   18.20
  -5   6   3   22.20   13.40
   5   6  -3   15.10   10.40
   5   6  -3   15.20    9.30
  -5   6   3   21.20   10.30
  -5   6   3   21.10    8.30
   4  -6  -3  479.25   54.99
  -4  -6   3  472.35   51.39
   4  -6  -3  394.06   54.19
  -4  -6   3  425.86   51.19
   4   6  -3  448.16   50.69
  -4   6   3  468.25   51.89
  -4   6   3  461.25   53.19
   4   6  -3  489.25   51.89
  -4   6   3  480.55   50.59
   3  -6  -3   31.50   14.40
  -3  -6   3   36.10   11.50
   3  -6  -3    7.40   18.80
  -3   6   3   33.00   12.20
  -3   6   3   32.80   10.60
   3   6  -3   43.80   11.70
   3   6  -3   36.50   10.70
  -3   6   3   22.30    8.80
  -2  -6   3   91.19   20.90
  -2  -6   3  150.28   20.20
   2  -6  -3  154.78   21.70
   2  -6  -3  129.29   24.80
  -2   6   3  147.69   19.90
  -2   6   3  147.79   17.70
   2   6  -3  126.49   18.50
   2   6  -3  151.78   20.20
   2   6  -3  112.49   17.50
  -2   6   3  138.79   19.60
  -1  -6   3   30.10   13.00
   1  -6  -3   48.10   17.90
   1  -6  -3   60.99   15.10
   1   6  -3   51.69   13.40
   1   6  -3   47.70   11.10
  -1   6   3   71.39   12.70
  -1   6   3   48.90   11.20
   1   6  -3   38.60   10.60
  -1   6   3   71.49   12.20
   0  -6  -3  -12.60   15.00
   0  -6   3    4.50   11.50
   0  -6  -3   16.60   13.00
   0   6   3   22.80    9.70
   0   6  -3   17.10    9.20
   0   6   3   15.10    9.70
   0   6  -3   10.70    8.80
   0   6  -3   32.10   12.80
   0   6   3    9.40    8.60
  -1  -6  -3   81.79   17.80
   1  -6   3   58.29   15.70
  -1  -6  -3   69.79   15.90
  -1   6  -3   76.19   16.50
   1   6   3   84.19   13.30
   1   6   3   47.00   12.40
   1   6   3   98.49   14.50
  -1   6  -3   85.99   13.30
  -1   6  -3   83.59   13.80
  -2  -6  -3   24.40   12.40
   2  -6   3    4.20   11.60
  -2  -6  -3   10.70   12.40
   2   6   3   13.40    8.50
   2   6   3  -10.40    8.00
  -2   6  -3   -0.60   13.10
  -2   6  -3   -2.90    8.40
   2   6   3   -0.50    8.90
  -2   6  -3    8.50    9.30
  -3  -6  -3  166.08   24.70
  -3  -6  -3  159.08   23.50
   3  -6   3  170.58   24.00
  -3   6  -3  190.48   25.20
   3   6   3  183.18   22.30
  -3   6  -3  151.78   21.50
  -3   6  -3  182.48   22.60
   3   6   3  160.78   21.50
   4  -6   3   -1.90   12.30
  -4  -6  -3    5.00   11.50
  -4   6  -3    0.30    9.50
   4   6   3    1.80    9.50
  -4   6  -3   -0.70    8.30
  -4   6  -3    9.90   13.50
   5  -6   3   -2.10   12.60
  -5  -6  -3   24.90   11.70
  -5   6  -3   -1.70   13.40
  -5   6  -3   17.70   10.40
   5   6   3    7.80   10.40
  -5   6  -3   -8.70    8.20
   6  -6   3  101.39   20.30
  -6  -6  -3  110.89   18.50
  -6   6  -3  117.29   16.90
  -6   6  -3  143.79   22.10
  -6   6  -3  140.09   18.80
   7  -6   3  205.28   29.80
  -7  -6  -3  228.78   29.00
  -7   6  -3  236.78   31.70
  -7   6  -3  229.68   27.60
  -7   6  -3  207.08   28.60
   8  -6   3  210.08   34.10
  -8   6  -3  310.47   37.90
  -8   6  -3  266.97   33.10
  -8   6  -3  283.07   31.40
   9  -6   3   61.49   18.20
  -9   6  -3   84.09   15.00
  -9   6  -3   64.79   19.30
  -9   6  -3   69.79   13.40
  10  -6   3  131.69   24.20
 -10   6  -3  145.09   20.20
 -10   6  -3  152.38   27.20
 -10   6  -3  151.18   21.20
  11  -6   3   20.90   16.90
 -11   6  -3   40.00   12.20
 -11   6  -3   43.20   19.50
 -11   6  -3   58.19   14.00
  12  -6   3   39.30   19.90
 -12   6  -3   81.19   14.10
 -12   6  -3  100.69   24.60
 -12   6  -3   81.69   16.60
  13  -6   3  -23.50   16.80
 -13   6  -3    6.10   13.30
 -13   6  -3    0.40   20.60
 -13   6  -3    7.50   10.40
  14  -6   3  162.08   22.20
  14  -6   3   84.89   24.70
 -14   6  -3  166.88   22.10
 -14   6  -3  129.09   20.10
 -14   6  -3  134.59   31.40
  15  -6   3  -17.50   17.30
 -15   6  -3   13.50   24.60
 -15   6  -3   -8.20   13.60
 -15   6  -3   11.90   12.20
  16  -6   3   69.39   16.80
  16  -6   3   -1.60   18.50
 -16   6  -3   50.09   15.00
 -16   6  -3   58.19   25.40
 -16   6  -3   77.59   17.60
  17  -6   3  -14.10   21.30
  17  -6   3   26.70   16.30
 -17   6  -3   33.90   14.40
 -17   6  -3   54.29   33.50
 -17   6  -3   37.00   13.40
  18  -6   3   19.90   22.60
  18  -6   3   74.99   19.90
 -18   6  -3   71.39   15.60
 -18   6  -3   84.39   35.00
  19  -6   3  -18.10   21.10
  19  -6   3    3.20   16.70
 -19   6  -3   15.90   33.50
 -19   6  -3   30.20   21.50
  20  -6   3  -26.60   22.10
  20  -6   3   20.50   18.00
 -20   6  -3   -5.40   15.90
 -20   6  -3   26.30   39.30
  19  -7  -3  -24.40   18.20
  19  -7  -3   -5.00   21.70
 -19   7   3  -14.30   19.20
 -19   7   3   12.50   17.40
 -19   7   3   16.00   39.10
  18  -7  -3   63.09   19.30
  18  -7  -3   40.00   23.10
 -18   7   3   67.69   22.50
 -18   7   3   72.79   39.50
  17  -7  -3  134.09   23.40
  17  -7  -3   72.39   26.20
 -17   7   3  170.28   28.20
 -17   7   3  167.08   42.10
  16  -7  -3   26.60   24.80
  16  -7  -3   73.39   19.70
 -16   7   3   97.19   35.80
 -16   7   3  111.79   21.90
 -16   7   3   83.99   19.10
  15  -7  -3  165.78   25.20
  15  -7  -3   69.29   29.90
 -15   7   3  208.38   30.40
 -15   7   3  154.88   25.70
 -15   7   3  178.48   38.40
  14  -7  -3   -2.50   21.10
  14  -7  -3    1.50   17.10
 -14   7   3   -0.30   15.90
 -14   7   3   25.60   19.50
 -14   7   3   46.50   28.80
  13  -7  -3  119.09   29.50
 -13   7   3  214.38   29.40
 -13   7   3  234.48   28.40
 -13   7   3  187.68   37.70
  12  -7  -3   81.79   25.20
  12  -7  -3   82.19   20.90
 -12   7   3   98.49   33.30
 -12   7   3  102.79   19.50
 -12   7   3  102.89   18.60
  11  -7  -3  -11.80   14.70
  11  -7  -3    3.00   19.90
 -11   7   3   35.20   23.90
 -11   7   3   -7.20   15.30
 -11   7   3   -4.30   12.60
  10  -7  -3   14.80   14.70
  10  -7  -3   16.90   20.10
 -10   7   3   -0.90   12.40
 -10   7   3   36.60   14.80
 -10   7   3   22.00   21.70
   9  -7  -3   20.10   18.60
   9  -7  -3   24.70   12.20
   9  -7  -3  -31.90   25.90
  -9   7   3   26.10   21.00
  -9   7   3   -8.80   13.80
  -9   7   3   12.70   12.20
   8  -7  -3   14.00   18.50
   8  -7  -3  -31.80   25.10
   8  -7  -3   27.60   11.90
  -8   7   3   35.40   14.70
  -8   7   3   30.30   13.90
  -8   7   3   52.59   21.00
   8   7  -3   25.20   14.60
   7  -7  -3  155.78   20.40
   7  -7  -3  102.79   34.70
   7  -7  -3  126.39   26.40
  -7   7   3  136.79   22.80
   7   7  -3  132.99   19.90
  -7   7   3  156.38   26.50
  -7   7   3  144.29   20.90
   6  -7  -3   -9.50   23.20
   6  -7  -3  -16.20   16.70
  -6   7   3  -10.50   13.30
  -6   7   3    1.00   10.60
  -6   7   3   14.90   17.90
   6   7  -3    3.90   13.30
   6   7  -3    9.70   10.40
   5  -7  -3   52.99   23.40
   5  -7  -3   14.20   18.00
  -5   7   3   47.20   14.70
  -5   7   3   38.00   11.70
  -5   7   3   55.99   18.00
   5   7  -3   25.20   12.30
   5   7  -3   30.40   13.60
   4  -7  -3  102.59   27.20
   4  -7  -3  136.69   24.40
  -4   7   3  119.69   20.30
   4   7  -3  101.69   19.30
  -4   7   3  117.59   19.20
  -4   7   3  151.98   23.10
   4   7  -3  144.49   20.60
   3  -7  -3   98.99   24.80
   3  -7  -3  116.49   22.60
  -3  -7   3  108.49   19.30
  -3   7   3  118.39   19.70
   3   7  -3  110.89   19.80
   3   7  -3   76.89   16.00
  -3   7   3  105.89   16.20
   3   7  -3   80.39   17.10
  -3   7   3   82.99   18.40
  -2  -7   3   48.30   16.50
   2  -7  -3   12.20   23.20
  -2  -7   3    3.30   17.30
   2  -7  -3   62.39   18.10
  -2   7   3   57.59   14.60
   2   7  -3   47.20   15.40
   2   7  -3   27.40   13.20
   2   7  -3   18.50   12.40
  -2   7   3   39.40   13.90
  -2   7   3   35.20   11.80
   1  -7  -3  137.69   26.10
  -1  -7   3  121.69   26.20
   1  -7  -3  143.19   28.60
  -1  -7   3  205.58   25.40
  -1   7   3  150.48   21.70
  -1   7   3  161.18   22.70
  -1   7   3  144.39   22.80
   1   7  -3  123.59   21.00
   1   7  -3  200.48   25.60
   1   7  -3  148.69   22.10
   0  -7  -3  101.39   19.40
   0  -7  -3   47.50   21.50
   0  -7   3  -28.20   20.10
   0  -7   3   59.09   17.40
   0   7   3   44.70   13.90
   0   7  -3   67.59   17.30
   0   7  -3   71.99   14.80
   0   7   3   79.89   14.70
   0   7   3   60.89   13.80
   0   7  -3   51.39   14.00
  -1  -7  -3   30.80   16.20
  -1  -7  -3    2.00   17.70
   1  -7   3   13.50   15.40
   1   7   3   36.50   12.60
  -1   7  -3    6.80   16.20
   1   7   3   -0.90   10.90
  -1   7  -3    2.70   11.90
  -1   7  -3    3.80   11.00
   2  -7   3  294.87   37.50
  -2  -7  -3  282.87   37.20
  -2  -7  -3  271.97   36.30
  -2   7  -3  242.08   34.20
  -2   7  -3  288.17   37.30
  -2   7  -3  259.27   33.50
   2   7   3  262.97   32.90
   2   7   3  248.88   33.70
  -3  -7  -3   66.49   16.30
  -3  -7  -3   48.10   17.40
   3  -7   3   38.50   17.00
   3   7   3   32.10   13.80
   3   7   3    8.30   12.10
  -3   7  -3   38.50   12.40
  -3   7  -3   44.90   13.60
  -3   7  -3   77.09   18.80
  -4  -7  -3  164.88   26.90
   4  -7   3  192.18   28.40
  -4   7  -3  192.18   25.90
  -4   7  -3  254.37   31.00
   4   7   3  180.38   25.60
  -4   7  -3  159.18   25.30
   5  -7   3  311.97   44.60
   5   7   3  346.77   41.60
  -5   7  -3  317.27   40.90
  -5   7  -3  400.36   46.30
  -5   7  -3  363.26   42.70
   6  -7   3   25.40   17.20
   6   7   3   29.70   12.70
  -6   7  -3   31.20   14.20
  -6   7  -3   28.70   11.70
  -6   7  -3   55.59   20.00
   7  -7   3  240.48   39.90
  -7   7  -3  312.27   37.40
  -7   7  -3  386.36   44.30
  -7   7  -3  322.67   39.20
   7   7   3  296.47   38.40
   8  -7   3    9.60   17.50
  -8   7  -3   45.00   15.30
  -8   7  -3   18.80   12.40
  -8   7  -3   47.80   21.70
   9  -7   3   39.30   19.90
  -9   7  -3   96.19   24.70
  -9   7  -3   69.29   17.40
  -9   7  -3   71.69   17.30
  10  -7   3   49.20   21.70
 -10   7  -3  129.89   20.40
 -10   7  -3  109.79   18.10
 -10   7  -3  122.69   28.10
  11  -7   3    1.40   18.50
 -11   7  -3   42.00   13.20
 -11   7  -3   37.90   25.20
 -11   7  -3   24.20   14.90
  12  -7   3  -49.50   16.80
 -12   7  -3  -22.80   14.40
 -12   7  -3   16.90   25.20
 -12   7  -3  -18.80   11.70
  13  -7   3  -42.80   17.00
 -13   7  -3   -5.80   13.50
 -13   7  -3   -7.90   26.20
 -13   7  -3   15.50   17.50
  14  -7   3   11.80   15.80
  14  -7   3  -35.90   17.60
 -14   7  -3    1.30   16.10
 -14   7  -3   -5.70   14.90
 -14   7  -3    2.10   27.50
  15  -7   3  -31.40   18.60
 -15   7  -3   -4.40   30.40
 -15   7  -3    6.60   18.00
 -15   7  -3   -7.70   14.90
  16  -7   3  -13.70   21.10
  16  -7   3   29.40   19.10
 -16   7  -3   43.90   18.00
 -16   7  -3   19.70   33.40
 -16   7  -3   17.50   14.80
  17  -7   3   12.90   25.30
 -17   7  -3   70.89   19.90
 -17   7  -3   58.49   17.00
 -17   7  -3   74.89   38.60
  18  -7   3    7.30   21.40
  18  -7   3  -28.60   24.00
 -18   7  -3   27.60   35.60
  17  -8  -3   -3.40   28.30
 -17   8   3   33.00   37.00
 -17   8   3    1.90   27.20
  16  -8  -3   15.90   28.90
 -16   8   3   71.49   20.40
 -16   8   3  101.69   29.90
  15  -8  -3  -19.70   21.20
 -15   8   3    6.70   23.20
 -15   8   3   32.20   38.00
  14  -8  -3   38.90   27.40
 -14   8   3  103.99   21.10
 -14   8   3  104.79   38.40
 -14   8   3  122.29   29.80
  13  -8  -3   10.90   23.80
  13  -8  -3  -87.19   32.50
  13  -8  -3   21.20   15.90
 -13   8   3   20.90   16.60
 -13   8   3   19.20   30.90
 -13   8   3   38.40   26.00
  12  -8  -3  -82.49   38.80
  12  -8  -3    7.50   22.80
 -12   8   3   52.69   18.60
 -12   8   3   36.50   30.00
  11  -8  -3   26.60   23.60
  11  -8  -3  -37.00   32.10
 -11   8   3   45.00   17.60
 -11   8   3   42.50   19.00
 -11   8   3   79.69   29.90
  10  -8  -3  -47.20   30.50
  10  -8  -3   19.60   22.60
 -10   8   3   58.49   19.40
 -10   8   3   44.50   18.00
   9  -8  -3   45.10   23.10
   9  -8  -3  -32.20   30.20
  -9   8   3   25.70   18.50
  -9   8   3   16.80   30.00
  -9   8   3   46.90   17.70
   8  -8  -3   54.69   23.30
   8  -8  -3  -30.50   30.30
  -8   8   3   92.59   20.00
  -8   8   3   49.70   17.70
  -8   8   3   57.29   24.70
   7  -8  -3  -78.09   33.10
   7  -8  -3    1.90   20.80
  -7   8   3   24.30   21.80
  -7   8   3   -2.90   14.50
  -7   8   3   12.20   17.00
   7   8  -3   -2.30   14.20
   6  -8  -3    6.10   21.20
   6  -8  -3  -29.50   27.00
  -6   8   3   35.20   18.60
   6   8  -3   11.90   14.80
  -6   8   3   28.10   14.20
  -6   8   3   29.10   22.60
   5  -8  -3    2.70   21.50
   5  -8  -3   12.10   32.20
  -5   8   3   31.20   16.90
   5   8  -3   44.10   15.10
  -5   8   3   29.70   21.60
  -5   8   3   28.90   14.20
   4  -8  -3   -3.30   30.20
   4  -8  -3  -18.00   20.40
   4   8  -3   -0.70   15.00
  -4   8   3    6.60   13.60
  -4   8   3  -18.00   15.30
   4   8  -3   19.10   13.90
  -4   8   3   39.40   19.40
   3  -8  -3    7.70   20.30
   3  -8  -3  -16.60   27.20
  -3   8   3   24.20   17.70
  -3   8   3   15.30   15.10
  -3   8   3  -17.90   13.90
   3   8  -3   -3.10   14.20
   3   8  -3  -10.40   16.20
   3   8  -3    4.50   12.80
   2  -8  -3   55.29   22.10
   2  -8  -3   48.20   24.30
   2   8  -3   10.30   15.30
   2   8  -3   40.10   15.50
   2   8  -3   39.50   18.90
  -2   8   3   56.69   17.20
  -2   8   3   46.60   15.20
   1  -8  -3   -2.20   24.60
   1  -8  -3   38.60   21.50
  -1   8   3   53.69   18.00
   1   8  -3   11.60   19.10
   1   8  -3   -0.10   14.20
  -1   8   3   24.70   13.70
   1   8  -3   -5.90   13.40
   0  -8  -3   88.49   21.30
   0  -8   3   13.70   18.50
   0  -8  -3    8.20   24.00
   0   8  -3   28.00   19.40
   0   8  -3   26.80   16.30
   0   8  -3   19.60   15.30
   0   8   3   60.59   16.90
  -1  -8  -3  100.79   21.60
   1  -8   3  -15.70   28.60
  -1  -8  -3    9.70   24.20
   1  -8   3   61.69   20.90
   1   8   3   89.89   18.40
  -1   8  -3   59.19   17.30
  -1   8  -3   56.59   16.40
   1   8   3   63.39   16.50
  -1   8  -3   70.39   23.60
  -2  -8  -3   77.99   19.30
   2  -8   3    0.00   19.30
   2  -8   3  -74.49   24.70
  -2   8  -3   24.60   20.20
  -2   8  -3   18.40   16.90
  -2   8  -3   20.30   13.90
   2   8   3   39.20   14.30
   2   8   3   37.80   16.40
   3  -8   3   78.29   23.40
   3   8   3  104.79   20.70
   3   8   3   92.39   20.60
  -3   8  -3  135.59   28.50
  -3   8  -3  117.29   21.40
  -3   8  -3   86.49   21.20
   4  -8   3   38.70   22.10
  -4   8  -3  107.69   19.00
   4   8   3   67.99   17.40
  -4   8  -3  133.19   21.90
   4   8   3  100.39   19.80
  -4   8  -3  137.89   28.70
   5  -8   3   18.70   20.80
   5   8   3   31.70   16.30
  -5   8  -3  118.99   25.00
  -5   8  -3   63.39   16.20
  -5   8  -3   52.49   18.60
   5   8   3   35.90   14.80
   6  -8   3   76.79   25.60
  -6   8  -3  166.18   30.20
  -6   8  -3  179.28   25.10
   6   8   3  123.39   22.70
  -6   8  -3  101.49   23.00
   7  -8   3  -26.00   19.90
  -7   8  -3   62.59   29.40
  -7   8  -3   23.70   19.40
  -7   8  -3    4.20   16.00
   7   8   3    9.10   14.80
   8  -8   3  -14.00   20.40
  -8   8  -3   66.29   26.60
  -8   8  -3   46.30   18.10
  -8   8  -3   35.70   17.40
   9  -8   3  -43.90   18.80
  -9   8  -3   29.20   17.00
  -9   8  -3    8.90   25.40
  -9   8  -3    1.00   16.60
  10  -8   3  -24.50   20.30
 -10   8  -3   37.20   27.70
 -10   8  -3    7.20   17.20
 -10   8  -3   -4.90   21.70
  11  -8   3  -18.10   21.70
 -11   8  -3   11.20   21.80
 -11   8  -3   21.80   17.70
 -11   8  -3    7.70   27.40
  12  -8   3   -8.90   22.70
 -12   8  -3   -6.30   15.40
 -12   8  -3    5.80   30.80
 -12   8  -3    6.90   20.30
  13  -8   3   15.50   17.40
  13  -8   3  -10.10   23.20
 -13   8  -3   23.90   17.10
 -13   8  -3   91.59   36.40
 -13   8  -3   37.80   18.80
  14  -8   3  -48.70   21.80
 -14   8  -3   -3.10   33.80
 -14   8  -3   20.30   16.80
 -14   8  -3   33.20   20.00
  15  -8   3  -17.10   23.60
  15  -8   3   -4.10   17.80
 -15   8  -3   28.10   36.20
  13  -9  -3   56.99   29.30
  13  -9  -3  -21.90   37.80
 -13   9   3   72.89   28.00
 -13   9   3  114.19   41.20
 -13   9   3   91.39   21.60
  12  -9  -3 -101.79   43.50
  12  -9  -3   46.10   25.50
 -12   9   3   97.09   37.90
  11  -9  -3   29.20   27.50
  11  -9  -3  -29.30   38.50
 -11   9   3   25.80   20.60
 -11   9   3   39.60   21.20
  10  -9  -3  114.69   32.20
  10  -9  -3  127.09   41.80
  10   9  -3  114.99   24.20
 -10   9   3  170.28   28.00
   9  -9  -3   -5.20   36.20
   9  -9  -3   60.59   27.70
  -9   9   3   81.59   19.20
   9   9  -3   58.59   18.60
  -9   9   3   57.49   29.90
  -9   9   3   54.89   25.10
   8  -9  -3  -49.20   39.80
   8  -9  -3   17.10   25.40
  -8   9   3   23.60   21.20
  -8   9   3   17.20   19.50
   8   9  -3   37.10   18.50
   7  -9  -3  -11.70   41.50
   7  -9  -3   80.59   27.20
  -7   9   3   67.09   27.70
  -7   9   3   25.30   20.00
   7   9  -3   39.50   18.30
  -7   9   3   66.09   35.10
   6  -9  -3    6.40   32.60
   6  -9  -3   63.99   27.40
  -6   9   3   61.69   18.50
  -6   9   3   37.00   21.80
   6   9  -3   52.59   17.60
   6   9  -3   32.60   18.20
   5  -9  -3  156.28   43.00
   5  -9  -3   84.09   32.30
   5   9  -3   95.39   22.00
  -5   9   3  144.89   22.80
  -5   9   3  120.69   27.80
   5   9  -3   86.19   20.80
   4  -9  -3    5.40   36.70
   4  -9  -3   38.70   24.80
  -4   9   3   19.40   21.00
   4   9  -3   28.00   17.80
  -4   9   3    9.80   16.00
   4   9  -3   10.70   18.00
   3  -9  -3  210.98   40.90
   3  -9  -3  137.29   32.20
   3   9  -3  201.08   27.90
  -3   9   3  190.68   29.30
   3   9  -3  143.59   27.40
  -3   9   3  148.79   26.30
   2  -9  -3   45.70   24.60
   2   9  -3  -20.40   15.90
  -2   9   3   47.50   22.40
   2   9  -3   38.80   18.40
  -2   9   3    5.80   15.80
   1  -9  -3   53.59   25.10
   1   9  -3   15.70   16.90
  -1   9   3   18.00   18.80
  -1   9   3   35.00   16.60
   1   9  -3   37.20   18.50
   0   9  -3  115.09   22.30
   0   9  -3   45.50   19.40
   0   9   3  111.29   22.50
   0   9   3   62.29   19.10
   1   9   3   -0.40   15.70
   1   9   3   34.30   19.60
  -1   9  -3   43.20   22.40
  -1   9  -3    8.60   17.80
  -1   9  -3   45.70   19.30
  -2   9  -3  244.18   38.60
   2   9   3  198.48   31.40
  -2   9  -3  201.38   33.20
   2   9   3  213.38   34.20
  -2   9  -3  283.87   37.80
   3  -9   3   -5.40   21.50
  -3   9  -3    6.90   22.90
  -3   9  -3   33.30   23.40
  -3   9  -3   24.00   19.00
   3   9   3   18.80   16.60
   3   9   3   29.70   19.90
   4  -9   3  139.49   34.80
  -4   9  -3  163.18   31.40
   4   9   3  231.38   31.90
   4   9   3  162.28   29.60
  -4   9  -3  258.77   34.20
  -4   9  -3  363.06   48.60
   5  -9   3  -55.29   39.10
   5  -9   3    4.30   21.90
  -5   9  -3   26.20   22.40
   5   9   3   35.20   18.80
  -5   9  -3   19.00   19.30
   6  -9   3  -14.40   22.20
  -6   9  -3   36.00   17.70
  -6   9  -3   69.89   36.10
   6   9   3   29.60   17.80
  -6   9  -3   50.69   23.60
   7  -9   3   64.69   27.50
  -7   9  -3  144.89   25.30
  -7   9  -3   93.89   21.80
   8  -9   3   -0.50   25.00
  -8   9  -3   39.50   20.80
  -8   9  -3   23.10   17.50
   9  -9   3   81.69   31.80
  -9   9  -3  225.88   30.50
  -9   9  -3  174.38   27.90
  -9   9  -3  232.18   42.70
  10  -9   3   -8.70   24.70
 -10   9  -3   23.30   33.80
 -10   9  -3    9.70   21.50
 -10   9  -3   59.79   21.80
  11  -9   3    0.20   25.70
 -11   9  -3  105.29   40.00
 -11   9  -3   92.69   23.10
 -12   9  -3  112.69   43.30
 -12   9  -3   45.60   23.10
 -12   9  -3   28.20   24.20
   8  10  -3   31.20   21.00
   8  10  -3   23.40   20.80
  -8  10   3   26.40   19.40
  -8  10   3   40.50   27.00
   7 -10  -3   49.70   29.40
   7 -10  -3   94.19   54.29
   7  10  -3   11.20   20.00
   7  10  -3   46.90   20.70
   6 -10  -3   59.59   27.90
   6  10  -3   40.60   21.20
  -6  10   3   13.10   21.10
   6  10  -3   27.80   21.50
  -6  10   3   29.00   23.60
   5 -10  -3   53.79   28.30
   5  10  -3   33.50   19.70
  -5  10   3   63.09   29.10
   5  10  -3   14.60   19.80
   4  10  -3   46.40   21.40
  -4  10   3   24.50   21.70
   4  10  -3   52.79   19.20
  -4  10   3   16.20   22.40
  -3  10   3  135.79   29.40
  -3  10   3   98.09   24.80
   3  10  -3   26.20   23.20
   3  10  -3   98.39   23.10
  -2  10   3   25.60   19.80
  -2  10   3   73.89   23.40
   2  10  -3   72.19   23.60
   2  10  -3   17.00   20.90
  -1  10   3  102.99   27.40
   1  10  -3   51.09   22.10
   1  10  -3   57.79   20.20
   0  10  -3   67.09   25.90
   0  10  -3   12.60   23.10
   0  10   3   95.89   23.60
  -1  10  -3   25.60   21.20
  -1  10  -3   10.50   21.80
   1  10   3   33.70   23.80
  -2  10  -3  -12.20   20.90
   2  10   3   31.10   23.40
  -2  10  -3   17.30   21.40
  -3  10  -3   14.20   28.40
   3  10   3   42.80   26.40
  -3  10  -3   -6.90   18.30
  -4  10  -3   15.30   18.90
  -4  10  -3   21.80   22.70
   4  10   3   16.10   21.60
  -5  10  -3   26.20   23.60
   5  10   3   56.89   23.40
  -5  10  -3   69.19   32.40
 -26   0   4   41.80   18.10
  26   0  -4   37.80   22.30
 -25   0   4  -16.00   16.00
  25   0  -4   -3.10   17.60
 -24   0   4    2.00   15.40
  24   0  -4   -5.00   17.40
 -23   0   4   19.50   14.70
  23   0  -4    4.40   16.80
 -22   0   4   23.40   14.10
  22   0  -4   28.00   16.20
 -21   0   4   -9.10   12.30
  21   0  -4  -15.30   14.50
  21   0  -4    5.40   14.50
 -20   0   4   16.40   12.10
  20   0  -4  -31.10   13.60
  20   0  -4   -2.10   13.80
  19   0  -4   -5.60   14.60
  19   0  -4   -2.50   12.40
 -19   0   4    8.30   11.30
  18   0  -4  237.98   32.40
 -18   0   4  252.37   31.70
 -18   0   4  272.17   30.10
  18   0  -4  260.97   33.80
 -17   0   4   -0.30    7.60
  17   0  -4  -19.10   11.40
  17   0  -4  -10.90   11.40
 -17   0   4    1.20    9.40
  16   0  -4  592.74   68.29
  16   0  -4  693.73   69.49
 -16   0   4  622.14   67.19
 -16   0   4  573.84   67.89
  15   0  -4    2.10    9.20
  15   0  -4   -9.60   10.10
 -15   0   4   -5.00    8.00
 -15   0   4   -3.80    6.50
  14   0  -4  998.00  103.59
 -14   0   4  957.90  102.99
 -14   0   4  980.30  102.69
  14   0  -4  889.81  103.29
  13   0  -4   -6.80    8.20
 -13   0   4    4.10    7.10
  13   0  -4   12.00    7.70
 -13   0   4   -7.40    6.00
  12   0  -4    8.90    8.20
 -12   0   4    7.70    6.60
 -12   0   4   11.90    6.10
 -11   0   4   -1.60    5.80
  11   0  -4   -1.70    7.70
 -11   0   4    7.00    6.20
  10   0  -4  663.43   74.19
  10   0  -4  748.63   74.39
 -10   0   4  684.03   73.89
 -10   0   4  651.83   73.99
   9   0  -4    6.40    6.40
  -9   0   4   -3.30    5.30
  -9   0   4   -2.40    5.20
   8   0  -4 2472.15  268.67
  -8   0   4 2575.14  268.57
   8   0  -4 2495.65  268.77
  -8   0   4 2565.54  268.57
   7   0  -4   -3.10    5.50
  -7   0   4    0.70    4.70
  -7   0   4   -1.10    4.60
   7   0  -4   17.90    4.80
  -6   0   4  231.98   26.20
  -6   0   4  217.38   26.10
   6   0  -4  238.98   26.30
   6   0  -4  253.37   26.40
  -5   0   4    5.40    4.00
   5   0  -4    4.60    4.70
   5   0  -4   -3.70    4.30
  -5   0   4    0.00    4.20
   5   0  -4   12.10    5.60
   4   0  -4   33.30    6.00
   4   0  -4   29.50    5.70
   4   0  -4   35.70    7.10
  -4   0   4   31.50    5.10
  -4   0   4   25.50    5.30
   3   0  -4   -6.50    4.00
  -3   0   4   -0.80    3.50
  -3   0   4   -0.10    3.00
   3   0  -4   -3.00    4.00
   3   0  -4  -10.70    4.60
  -2   0   4   23.00    4.00
   2   0  -4   17.50    4.10
   2   0  -4   16.90    3.10
   2   0  -4   16.80    5.00
   1   0  -4   -2.60    3.50
   1   0  -4   -6.60    3.00
  -1   0   4    4.10    2.80
   1   0  -4    4.20    2.80
   1   0  -4   -3.20    4.10
   0   0  -4  937.11  101.09
   0   0  -4  987.10  101.39
   0   0   4  976.40  100.89
   0   0  -4  895.11  100.89
   0   0  -4  952.60  100.99
  -1   0  -4    3.30    1.80
   1   0   4    4.90    2.20
  -1   0  -4    0.40    3.80
   1   0   4   -0.70    2.20
  -1   0  -4   -2.00    4.70
  -1   0  -4   -1.40    1.90
  -1   0  -4   -2.20    2.10
   2   0   4   57.69    7.30
  -2   0  -4   54.49    8.30
  -2   0  -4   81.99   10.30
  -3   0  -4   -2.30    2.30
  -3   0  -4   -1.40    5.50
   3   0   4   -0.40    4.20
  -3   0  -4   -2.80    4.10
  -4   0  -4 5257.97  566.64
   4   0   4 5152.38  567.04
  -4   0  -4 5837.62  567.44
  -4   0  -4 5117.49  566.94
  -5   0  -4    1.60    4.60
   5   0   4    1.90    4.70
  -5   0  -4    5.20    5.80
  -5   0  -4    0.90    2.80
   6   0   4  398.96   42.60
   6   0   4  389.66   41.50
  -6   0  -4  368.06   43.00
  -6   0  -4  391.56   41.70
  -6   0  -4  390.06   42.50
   7   0   4    5.50    5.70
  -7   0  -4   -1.10    6.70
  -7   0  -4    0.00    3.60
   7   0   4    4.70    2.40
  -7   0  -4   -2.90    5.50
  -8   0  -4  111.19   15.10
   8   0   4  116.09   14.80
   8   0   4  118.49   15.10
  -8   0  -4  113.59   13.80
  -9   0  -4  -10.40    6.50
   9   0   4    6.20    6.40
  -9   0  -4   -1.10    4.30
   9   0   4   -3.40    6.10
  10   0   4  609.84   63.79
  10   0   4  553.74   63.09
 -10   0  -4  585.04   62.79
 -10   0  -4  580.14   63.79
 -11   0  -4   -9.30    7.50
  11   0   4    8.10    7.10
 -11   0  -4    1.60    5.10
  11   0   4   -8.20    6.60
  12   0   4  620.64   68.59
 -12   0  -4  643.44   67.49
 -12   0  -4  607.74   68.89
  12   0   4  625.64   67.79
 -13   0  -4   -8.00    9.20
  13   0   4    2.60    8.10
 -13   0  -4    3.00    6.20
  13   0   4    0.40    8.10
  14   0   4   78.99   12.30
  14   0   4   66.79   13.00
 -14   0  -4   52.69   10.50
 -14   0  -4   66.79   14.20
  15   0   4  -16.60    9.00
 -15   0  -4   -7.30    7.30
  15   0   4   -3.10    9.60
 -15   0  -4    2.60   12.20
  16   0   4   -1.60   10.30
  16   0   4   10.10   10.60
 -16   0  -4    0.10   13.20
 -16   0  -4   -0.70    8.20
  17   0   4    1.60   11.70
 -17   0  -4   13.20    8.80
 -17   0  -4  -13.80   14.30
  17   0   4  -10.30   10.30
  18   0   4  181.88   22.80
 -18   0  -4  137.09   20.80
  18   0   4  155.88   24.40
 -18   0  -4  187.68   27.40
  19   0   4  -10.60   11.80
  19   0   4   26.10   15.50
 -19   0  -4   -3.60   10.20
  20   0   4   68.39   17.50
  20   0   4   98.09   19.80
 -20   0  -4   73.99   15.10
  21   0   4   21.00   18.60
 -21   0  -4   29.60   12.40
  21   0   4   -1.70   14.40
 -22   0  -4   16.80   13.10
  22   0   4    3.70   14.30
  22   0   4   13.80   16.80
 -23   0  -4   -9.80   13.10
  23   0   4    1.40   17.10
  24   0   4   32.70   19.10
 -24   0  -4   21.70   15.10
 -26  -1   4   20.40   17.30
  26  -1  -4   11.50   18.20
 -26   1   4   57.49   18.60
  26   1  -4   30.60   23.10
  25  -1  -4  -19.20   17.80
 -25  -1   4   10.20   16.00
 -25   1   4   11.30   16.60
  25   1  -4   35.50   20.50
  24  -1  -4    4.20   15.60
 -24  -1   4   -6.00   15.00
  24   1  -4   16.30   19.50
 -24   1   4   -2.40   15.10
 -23  -1   4    0.20   14.00
  23  -1  -4   -4.70   16.60
  23  -1  -4  -25.10   18.80
  23   1  -4  -21.70   17.30
 -23   1   4  -23.50   14.20
  22  -1  -4  -10.60   19.50
  22  -1  -4    6.50   14.30
 -22  -1   4   19.10   13.50
  22   1  -4   -5.50   17.10
 -22   1   4   11.60   13.70
 -21  -1   4   20.30   13.10
  21  -1  -4   18.40   16.40
  21  -1  -4    7.80   14.30
 -21   1   4   13.70   12.80
  21   1  -4   24.00   16.10
  20  -1  -4   -0.60   14.00
 -20  -1   4   -6.30   12.00
 -20   1   4   15.90   11.70
  20   1  -4    1.50   14.30
  19  -1  -4    3.40   14.70
  19  -1  -4   -9.30   12.10
 -19  -1   4    4.60   11.50
  19   1  -4   -3.00   14.50
 -19   1   4   10.10   10.70
 -19   1   4   -2.00    8.40
  18  -1  -4   79.39   17.80
 -18  -1   4   64.49   14.40
  18  -1  -4   74.09   15.70
  18   1  -4   87.69   15.90
 -18   1   4   64.89   14.00
 -18   1   4   93.19   12.70
  18   1  -4   75.69   16.30
 -17  -1   4  500.65   61.39
  17  -1  -4  481.55   61.49
  17  -1  -4  584.74   62.89
 -17  -1   4  571.04   60.19
 -17   1   4  568.94   61.29
  17   1  -4  505.35   61.89
  17   1  -4  606.84   63.69
 -17   1   4  591.94   60.49
  16  -1  -4  107.29   19.00
 -16  -1   4  117.09   17.40
 -16  -1   4  125.89   15.80
  16  -1  -4  123.79   18.60
  16   1  -4  152.48   19.40
 -16   1   4  101.59   16.80
 -16   1   4  148.69   17.10
  16   1  -4  135.29   18.40
 -15  -1   4  120.99   15.90
 -15  -1   4  114.79   14.00
  15  -1  -4  114.39   17.40
  15  -1  -4   94.49   16.10
 -15   1   4  101.59   15.00
 -15   1   4  125.69   14.50
  15   1  -4   88.39   15.30
  15   1  -4  117.09   17.20
 -14  -1   4   18.70    6.50
  14  -1  -4   19.60    9.70
 -14  -1   4    2.30    8.00
  14  -1  -4    7.50    9.60
 -14   1   4   19.20    7.30
  14   1  -4   12.90    9.70
 -14   1   4   25.40    7.30
  14   1  -4   16.40    7.60
 -13  -1   4   42.70   10.00
 -13  -1   4   51.69    8.50
  13  -1  -4   27.70   10.30
  13  -1  -4   65.19   11.60
 -13   1   4   52.59    9.10
  13   1  -4   55.49   11.10
 -13   1   4   46.50    9.00
  13   1  -4   58.79    9.60
 -12  -1   4  519.05   54.69
  12  -1  -4  464.95   55.29
 -12  -1   4  495.35   55.29
  12  -1  -4  541.65   56.29
  12   1  -4  485.95   55.39
  12   1  -4  510.85   55.09
 -12   1   4  520.95   54.99
 -12   1   4  495.95   54.99
  11  -1  -4  377.76   40.80
 -11  -1   4  352.36   39.20
  11  -1  -4  355.96   39.90
 -11  -1   4  329.17   39.80
  11   1  -4  375.16   39.60
 -11   1   4  364.06   39.50
 -11   1   4  341.37   39.40
  11   1  -4  361.56   40.00
  10  -1  -4  154.58   19.80
 -10  -1   4  149.88   19.40
 -10  -1   4  145.39   19.90
  10  -1  -4  195.38   21.50
 -10   1   4  147.79   19.70
  10   1  -4  171.98   20.20
  10   1  -4  185.98   19.60
 -10   1   4  152.58   19.40
   9  -1  -4  101.49   13.10
  -9  -1   4   75.89   11.90
  -9  -1   4   96.79   12.80
   9  -1  -4  136.79   15.50
   9   1  -4  126.19   13.00
  -9   1   4   79.29   11.90
   9   1  -4   83.69   13.30
  -9   1   4   87.29   12.20
  -8  -1   4    1.70    5.50
   8  -1  -4   19.70    7.00
   8  -1  -4   -2.20    5.80
  -8  -1   4   -1.30    4.80
  -8   1   4    6.30    5.10
  -8   1   4   13.50    4.60
   8   1  -4   12.20    6.70
  -7  -1   4  115.59   14.30
   7  -1  -4  109.09   14.40
  -7  -1   4  115.39   14.20
   7  -1  -4  123.59   15.80
   7   1  -4  127.59   13.80
   7   1  -4  112.39   14.60
  -7   1   4  111.59   13.80
  -7   1   4  108.29   14.40
  -6  -1   4    3.60    4.30
  -6  -1   4   -1.60    4.80
   6  -1  -4    4.20    4.70
  -6  -1   4    4.60    3.20
   6  -1  -4    6.90    5.60
   6   1  -4    0.50    4.70
  -6   1   4   -5.10    3.40
  -6   1   4   -3.20    4.10
   6   1  -4   -3.60    5.70
   6   1  -4    6.60    3.60
   5  -1  -4  256.67   27.50
   5  -1  -4  259.17   26.50
   5  -1  -4  257.77   28.00
  -5  -1   4  246.98   26.80
  -5  -1   4  234.68   26.60
  -5  -1   4  212.78   26.10
  -5   1   4  238.88   26.20
   5   1  -4  248.08   26.30
  -5   1   4  250.37   26.50
   5   1  -4  234.28   26.50
   5   1  -4  236.78   26.90
  -4  -1   4  180.68   20.40
   4  -1  -4  189.28   20.20
   4  -1  -4  177.88   21.30
   4  -1  -4  185.18   21.90
  -4  -1   4  175.88   19.90
  -4  -1   4  173.88   20.10
   4   1  -4  190.98   20.60
   4   1  -4  174.18   20.10
   4   1  -4  187.28   21.10
  -4   1   4  196.38   19.90
  -4   1   4  181.18   20.30
   3  -1  -4  931.41   98.69
   3  -1  -4  936.41   98.19
  -3  -1   4  906.51   98.19
   3  -1  -4  895.71   98.89
  -3  -1   4  940.41   98.29
   3   1  -4  891.11   98.49
  -3   1   4  951.60   98.29
   3   1  -4  949.90   98.39
   3   1  -4  902.91   98.19
  -3   1   4  920.81   98.09
   2  -1  -4   68.09    7.20
   2  -1  -4   48.70    9.50
   2  -1  -4   46.50    6.70
  -2  -1   4   55.89    7.80
  -2  -1   4   56.29    7.30
   2  -1  -4   66.89    8.70
   2   1  -4   60.19    8.40
  -2   1   4   70.19    7.20
  -2   1   4   60.19    7.20
   2   1  -4   78.69    8.30
   2   1  -4   49.10    7.40
  -2   1   4   54.59    6.80
   1  -1  -4  435.66   52.49
   1  -1  -4  509.55   53.19
  -1  -1   4  509.25   52.79
   1  -1  -4  500.45   53.39
   1  -1  -4  511.55   52.49
   1  -1  -4  442.56   52.29
  -1  -1   4  499.85   52.69
   1   1  -4  506.75   52.79
   1   1  -4  509.15   53.19
   1   1  -4  517.45   52.99
  -1   1   4  480.65   52.59
  -1   1   4  499.45   52.29
  -1   1   4  496.15   52.39
   0  -1   4   11.40    3.40
   0  -1  -4    5.10    2.30
   0  -1  -4    8.90    2.70
   0  -1  -4    5.40    5.70
   0  -1   4    9.50    3.70
   0   1   4    3.70    2.40
   0   1   4   13.00    2.80
   0   1  -4   13.30    5.20
   0   1  -4    3.20    4.20
   0   1  -4   12.20    5.30
   1  -1   4   38.30    5.90
   1  -1   4   39.40    5.20
  -1   1  -4   48.50    5.50
  -1   1  -4   26.00    6.90
   1   1   4   30.10    4.60
  -1   1  -4   37.40    6.60
  -1   1  -4   28.80    5.30
  -2  -1  -4 2162.48  251.17
  -2  -1  -4 2087.09  251.57
  -2  -1  -4 2470.85  251.07
   2  -1   4 2353.56  251.57
   2  -1   4 2356.46  251.27
  -2   1  -4 2334.87  251.27
  -2   1  -4 2678.43  251.87
   2   1   4 2355.06  250.97
  -2   1  -4 2369.76  251.27
   2   1   4 2500.85  251.17
  -2   1  -4 2357.66  251.67
  -3  -1  -4   14.40    6.80
  -3  -1  -4   13.40    3.00
  -3  -1  -4    7.10    3.10
   3  -1   4   15.90    4.70
   3  -1   4    9.80    3.40
   3   1   4    5.00    3.20
  -3   1  -4   13.50    5.70
  -3   1  -4   15.60    6.10
  -3   1  -4    8.00    3.30
  -3   1  -4   15.30    3.70
  -4  -1  -4  811.42   74.59
   4  -1   4  692.33   75.29
  -4  -1  -4  600.54   74.69
   4  -1   4  681.73   74.69
  -4  -1  -4  804.52   75.79
  -4   1  -4  664.03   75.39
  -4   1  -4  703.93   74.69
  -4   1  -4  658.13   74.59
  -5  -1  -4  514.65   58.79
  -5  -1  -4  600.54   58.59
   5  -1   4  560.44   58.69
  -5  -1  -4  482.75   59.49
   5  -1   4  543.55   59.49
  -5   1  -4  579.94   59.59
  -5   1  -4  534.95   58.49
   5   1   4  539.15   58.69
  -5   1  -4  582.64   58.69
  -6  -1  -4   46.60    8.80
   6  -1   4   53.89    8.20
  -6  -1  -4   78.09    8.50
  -6  -1  -4   63.49   10.80
   6  -1   4   69.69   10.20
  -6   1  -4   76.39    8.60
  -6   1  -4   71.89    7.90
   6   1   4   71.99    9.00
  -6   1  -4   66.09   10.50
   6   1   4   64.79    9.60
  -7  -1  -4  308.77   38.80
  -7  -1  -4  358.76   37.50
   7  -1   4  356.56   38.70
  -7  -1  -4  338.07   38.00
   7   1   4  359.56   38.40
  -7   1  -4  336.67   37.50
   7   1   4  373.36   37.70
  -7   1  -4  336.77   37.10
  -7   1  -4  346.67   38.90
  -8  -1  -4  232.78   27.80
  -8  -1  -4  226.68   28.60
  -8  -1  -4  251.27   27.10
   8  -1   4  255.07   28.70
  -8   1  -4  240.38   26.40
   8   1   4  252.67   27.40
   8   1   4  254.97   28.00
  -8   1  -4  244.88   28.90
  -8   1  -4  238.18   27.00
  -9  -1  -4  629.04   69.89
  -9  -1  -4  667.13   69.29
   9  -1   4  585.94   70.09
  -9  -1  -4  626.74   70.39
   9   1   4  681.73   69.89
  -9   1  -4  655.53   69.19
  -9   1  -4  635.74   68.69
   9   1   4  672.13   69.39
  -9   1  -4  646.04   70.39
 -10  -1  -4  129.89   16.30
  10  -1   4  127.29   16.70
  10  -1   4  133.29   18.60
 -10  -1  -4  148.89   17.80
 -10   1  -4  143.69   18.30
  10   1   4  131.09   17.00
  10   1   4  122.19   17.50
 -10   1  -4  124.79   16.00
 -11  -1  -4  119.29   15.00
  11  -1   4  133.39   17.20
 -11  -1  -4  111.09   16.50
  11  -1   4  133.89   15.90
  11   1   4  113.89   15.70
 -11   1  -4  117.29   14.70
  11   1   4  113.09   16.10
 -11   1  -4  120.29   17.20
 -12  -1  -4   12.20    6.90
  12  -1   4   21.30    9.20
  12  -1   4   16.30    8.10
 -12  -1  -4   24.70    9.10
  12   1   4   28.70    8.30
  12   1   4   21.10    8.40
 -12   1  -4   21.10    6.30
 -12   1  -4   20.90    9.80
  13  -1   4   13.30    8.50
 -13  -1  -4    3.80    7.20
  13  -1   4   -0.30    9.00
 -13  -1  -4    2.10    9.10
 -13   1  -4   -5.40    6.00
  13   1   4    7.90    8.20
  13   1   4    1.70    7.90
 -13   1  -4    5.30   10.10
  14  -1   4  120.59   18.00
 -14  -1  -4  127.79   17.30
  14  -1   4  166.58   20.30
 -14   1  -4   98.69   16.60
  14   1   4  151.98   19.90
  14   1   4  161.88   18.60
 -14   1  -4  132.89   20.80
 -15  -1  -4    2.80    8.30
  15  -1   4    5.50    9.10
  15  -1   4   17.20   11.20
 -15   1  -4   20.10    7.90
 -15   1  -4   14.60   13.20
  15   1   4   16.80    9.80
  15   1   4   -6.60    9.90
  16  -1   4  101.49   17.70
 -16  -1  -4   75.69   14.10
  16  -1   4  100.89   15.60
  16   1   4   79.19   15.90
  16   1   4  107.49   17.90
 -16   1  -4  110.39   19.70
 -16   1  -4   77.69   13.60
  17  -1   4   48.50   15.30
  17  -1   4   43.40   12.00
 -17  -1  -4   40.80   10.80
 -17   1  -4   45.40   17.70
 -17   1  -4   37.70   10.10
  17   1   4   27.00   12.50
  17   1   4    2.90   12.50
  18  -1   4   28.80   12.70
 -18  -1  -4   32.00   11.30
  18  -1   4   30.90   14.90
 -18   1  -4   27.80   10.50
  18   1   4   25.90   13.30
 -18   1  -4   56.59   19.30
  18   1   4   27.40   13.50
  19  -1   4  214.68   28.90
  19  -1   4  175.78   24.80
 -19  -1  -4  175.38   23.70
 -19   1  -4  214.18   32.00
  19   1   4  134.89   25.10
 -19   1  -4  170.38   23.30
  19   1   4  210.68   30.20
 -20  -1  -4   48.70   13.80
  20  -1   4   65.79   15.00
  20  -1   4   59.39   19.30
 -20   1  -4   48.80   13.30
  20   1   4   46.60   16.00
 -20   1  -4   93.79   24.00
  20   1   4   53.49   17.80
  21  -1   4   20.60   15.80
 -21  -1  -4   34.60   13.30
  21  -1   4   33.90   21.20
 -21   1  -4   70.09   26.50
 -21   1  -4   55.59   13.70
  21   1   4   49.30   18.20
  22  -1   4  189.68   31.90
 -22  -1  -4  149.79   21.90
  22  -1   4  120.49   23.60
  22   1   4  138.39   26.40
 -22   1  -4  149.88   22.20
  23  -1   4   -3.20   15.30
  23  -1   4   20.20   20.40
 -23  -1  -4  -19.40   13.00
  23   1   4    8.70   20.70
 -23   1  -4    7.90   13.10
 -24  -1  -4   42.30   15.00
  24  -1   4   46.20   18.20
  24  -1   4   41.20   22.80
 -24   1  -4   62.09   15.80
  24   1   4   21.90   23.10
  26  -2  -4   -3.30   19.40
 -26  -2   4    8.30   17.30
 -26   2   4   24.70   18.20
  26   2  -4   40.40   23.00
  25  -2  -4   33.00   24.20
  25  -2  -4   18.10   16.70
 -25  -2   4   67.79   17.90
  25   2  -4   39.50   22.60
 -25   2   4   66.59   18.80
 -24  -2   4   58.99   17.20
  24  -2  -4   13.10   24.10
  24  -2  -4   31.40   16.70
 -24   2   4   26.80   16.60
  24   2  -4   42.70   21.10
  23  -2  -4  112.19   25.70
  23  -2  -4  133.79   23.50
 -23  -2   4  119.59   21.50
 -23   2   4  148.19   22.40
  23   2  -4  119.99   25.00
  22  -2  -4  -16.50   18.60
 -22  -2   4   16.60   13.90
  22  -2  -4    1.90   14.40
 -22   2   4   17.20   14.20
  22   2  -4  -10.40   18.70
  21  -2  -4  101.19   19.30
  21  -2  -4   92.29   22.50
 -21  -2   4  106.59   19.00
 -21   2   4  121.69   18.70
  21   2  -4  103.19   23.00
 -20  -2   4   75.39   15.50
  20  -2  -4   32.30   15.00
  20   2  -4   48.20   18.10
 -20   2   4   88.89   13.10
 -20   2   4   62.69   14.70
 -19  -2   4   58.49   16.60
  19  -2  -4   96.49   17.70
  19  -2  -4   94.59   20.20
  19   2  -4   62.29   19.10
 -19   2   4  130.89   15.30
 -19   2   4  107.49   16.30
 -18  -2   4   12.50   11.70
  18  -2  -4   31.80   12.70
  18  -2  -4   36.70   15.50
  18   2  -4   -0.60   14.10
 -18   2   4   27.80   10.90
 -18   2   4   26.80    9.90
  17  -2  -4   26.80   15.20
  17  -2  -4   22.50   11.60
 -17  -2   4   10.60   11.00
 -17   2   4   35.10   10.00
 -17   2   4   27.60    9.80
  17   2  -4   18.40   13.60
  16  -2  -4   -4.30    9.90
 -16  -2   4   -0.30    9.80
  16  -2  -4   -6.90   13.30
 -16  -2   4   -7.10    6.40
 -16   2   4    3.80    8.30
 -16   2   4    3.40    8.80
  16   2  -4    9.00   12.60
  16   2  -4    1.70   11.00
  15  -2  -4  233.58   30.40
  15  -2  -4  212.38   27.60
 -15  -2   4  215.38   27.00
 -15  -2   4  236.68   25.90
  15   2  -4  206.48   27.10
 -15   2   4  257.57   27.00
 -15   2   4  202.38   26.60
  15   2  -4  222.88   27.90
  14  -2  -4   22.80   11.90
 -14  -2   4   26.60    9.70
 -14  -2   4   40.30    7.20
  14  -2  -4   34.50    9.80
 -14   2   4   11.50    7.50
 -14   2   4   23.20   13.60
 -14   2   4   34.00    8.50
  14   2  -4   32.50   11.30
  14   2  -4   16.20    7.90
 -13  -2   4  519.05   55.99
  13  -2  -4  502.15   56.79
 -13  -2   4  498.45   56.89
  13  -2  -4  520.35   58.29
  13   2  -4  439.96   56.09
 -13   2   4  562.34   56.49
  13   2  -4  556.34   57.19
 -13   2   4  561.44   56.49
 -13   2   4  537.05   59.69
 -12  -2   4   10.80    5.70
 -12  -2   4   -8.00    7.50
  12  -2  -4   -7.10    7.80
  12  -2  -4    3.00    9.50
 -12   2   4  -12.10   11.00
 -12   2   4    4.10    5.70
 -12   2   4    4.50    6.60
  12   2  -4    2.60    9.20
  12   2  -4   -1.50    5.10
 -11  -2   4 1167.68  119.39
  11  -2  -4 1153.28  119.79
 -11  -2   4 1110.39  119.79
  11  -2  -4 1095.29  120.59
 -11   2   4 1174.98  121.29
 -11   2   4 1090.99  119.49
  11   2  -4 1114.29  119.89
 -11   2   4 1181.48  119.59
  11   2  -4  998.80  119.19
  10  -2  -4  290.77   31.90
 -10  -2   4  263.37   32.20
 -10  -2   4  300.87   31.40
  10  -2  -4  280.17   33.90
 -10   2   4  289.47   31.70
 -10   2   4  308.97   31.50
 -10   2   4  259.87   34.70
  10   2  -4  269.97   30.80
  10   2  -4  271.57   32.30
  -9  -2   4  284.47   33.40
   9  -2  -4  312.47   34.70
   9  -2  -4  305.87   33.20
  -9  -2   4  298.37   32.70
   9   2  -4  292.37   33.50
  -9   2   4  307.07   33.00
  -9   2   4  283.07   32.70
  -9   2   4  277.97   35.50
  -8  -2   4   -1.80    5.20
   8  -2  -4   12.80    6.20
   8  -2  -4   15.30    8.40
   8   2  -4    1.00    7.50
  -8   2   4   11.70    4.90
   8   2  -4    5.40    3.20
  -8   2   4   22.90    9.90
  -8   2   4    1.30    5.60
   7  -2  -4    0.70    5.20
   7  -2  -4   12.10    7.80
  -7  -2   4    2.40    4.90
  -7   2   4    2.30    5.10
  -7   2   4   -0.90    4.20
   7   2  -4   -1.30    7.00
  -7   2   4   -3.30    7.50
   7   2  -4   -1.70    7.00
   7   2  -4   -2.60    3.10
  -6  -2   4   68.09    9.80
   6  -2  -4   74.99    9.90
   6  -2  -4   61.49   11.40
   6   2  -4   74.39   10.70
  -6   2   4   83.19   10.10
  -6   2   4   70.89    9.40
   6   2  -4   91.19   11.10
  -6   2   4   79.79   12.40
   5  -2  -4  148.89   20.10
  -5  -2   4  160.48   18.40
   5  -2  -4  160.78   17.90
   5   2  -4  158.58   18.60
  -5   2   4  151.78   17.80
  -5   2   4  158.38   18.30
  -5   2   4  151.28   20.20
   5   2  -4  172.18   19.40
  -4  -2   4   26.50    5.80
   4  -2  -4   37.30    5.40
  -4  -2   4   29.70    4.50
   4  -2  -4   35.30    7.70
  -4   2   4   32.70    7.90
  -4   2   4   28.30    4.90
   4   2  -4   34.60    7.10
   4   2  -4   41.70    6.90
  -4   2   4   29.90    5.70
   3  -2  -4 4148.58  411.16
   3  -2  -4 3891.71  411.26
  -3  -2   4 3868.41  410.66
   3  -2  -4 4034.90  410.46
  -3  -2   4 3768.32  410.46
  -3  -2   4 3547.34  410.46
   3   2  -4 3806.42  410.86
   3   2  -4 3987.70  410.66
  -3   2   4 3941.81  411.06
  -3   2   4 3773.72  410.66
  -3   2   4 3786.52  410.46
  -2  -2   4  605.14   67.19
  -2  -2   4  603.54   66.99
   2  -2  -4  614.54   68.19
   2  -2  -4  661.03   67.79
   2  -2  -4  632.14   66.79
  -2   2   4  633.64   66.79
   2   2  -4  646.44   67.19
  -2   2   4  626.34   67.59
   2   2  -4  622.94   67.69
  -2   2   4  627.94   67.09
   1  -2  -4  657.03   70.39
   1  -2  -4  661.33   70.09
  -1  -2   4  654.83   69.49
  -1  -2   4  627.74   69.59
   1  -2  -4  646.34   68.99
   1   2  -4  687.83   70.09
   1   2  -4  683.03   69.59
  -1   2   4  635.24   69.39
  -1   2   4  604.14   69.19
   0  -2  -4   44.40    7.20
   0  -2  -4   42.50    7.20
   0  -2   4   60.49    7.80
   0  -2  -4   56.99    9.50
   0  -2  -4   72.29    9.30
   0  -2   4   53.59    7.60
   0   2   4   56.39    7.10
   0   2   4   52.09    6.60
   0   2  -4   56.49    9.20
   0   2  -4   58.89    8.50
   1  -2   4  733.93   77.89
   1  -2   4  759.82   77.69
  -1  -2  -4  618.64   77.19
  -1  -2  -4  782.52   78.19
  -1   2  -4  720.13   77.69
  -1   2  -4  730.53   77.59
  -1   2  -4  734.23   78.19
   1   2   4  746.53   77.39
   2  -2   4    4.90    4.10
  -2  -2  -4   35.90    7.20
   2  -2   4    3.40    4.90
  -2   2  -4   -2.90    5.70
  -2   2  -4    2.40    4.10
  -2   2  -4    3.90    4.30
   3  -2   4   84.59   12.60
  -3  -2  -4  111.79   14.60
   3  -2   4   96.39   13.70
  -3   2  -4  121.19   14.20
  -3   2  -4  102.89   12.80
   3   2   4   99.39   11.30
  -3   2  -4  103.99   12.60
  -4  -2  -4   -0.50    6.80
   4  -2   4    8.80    4.10
   4  -2   4    8.10    5.40
  -4   2  -4    8.30    6.80
  -4   2  -4    3.80    4.00
  -4   2  -4    4.80    4.30
   4   2   4   -1.50    3.00
  -5  -2  -4    1.90    7.40
   5  -2   4    1.50    3.90
   5  -2   4    4.60    5.80
  -5  -2  -4    5.10    4.00
  -5   2  -4   -2.30    4.20
   5   2   4   -3.90    3.50
  -5   2  -4   -3.00    6.70
  -5   2  -4   -1.90    3.90
  -6  -2  -4   49.50   10.90
   6  -2   4   62.59   10.30
  -6  -2  -4   46.10    8.10
  -6   2  -4   60.89    8.00
  -6   2  -4   58.19   10.80
  -6   2  -4   70.29    8.50
   6   2   4   59.79    8.00
   7  -2   4  554.64   60.59
  -7  -2  -4  553.24   59.49
  -7  -2  -4  545.75   60.79
   7   2   4  577.74   59.39
  -7   2  -4  532.05   59.29
  -7   2  -4  530.85   59.49
  -7   2  -4  582.14   60.89
  -8  -2  -4  716.53   77.39
  -8  -2  -4  752.02   78.59
   8  -2   4  690.63   78.39
  -8   2  -4  720.93   78.69
   8   2   4  738.63   77.89
  -8   2  -4  725.13   77.39
  -8   2  -4  696.83   77.09
   8   2   4  728.13   77.29
  -9  -2  -4  815.62   88.99
  -9  -2  -4  836.82   87.89
   9  -2   4  784.32   88.99
   9   2   4  832.02   87.79
  -9   2  -4  804.42   87.49
  -9   2  -4  805.12   87.79
  -9   2  -4  825.32   89.19
   9   2   4  852.21   88.39
 -10  -2  -4  311.17   36.60
  10  -2   4  306.07   36.50
 -10  -2  -4  309.37   35.00
 -10   2  -4  324.17   34.20
 -10   2  -4  293.27   36.70
  10   2   4  338.47   35.80
  10   2   4  318.57   35.00
 -10   2  -4  295.67   34.60
 -11  -2  -4  138.69   20.00
  11  -2   4  127.09   18.60
 -11  -2  -4  138.39   16.90
  11   2   4  119.69   18.10
 -11   2  -4  136.49   16.00
 -11   2  -4  129.59   16.90
 -11   2  -4  160.78   20.00
  11   2   4  142.59   17.60
  12  -2   4    6.10    9.30
 -12  -2  -4    8.90    7.80
  12  -2   4    4.20    8.70
 -12   2  -4    8.60    5.80
  12   2   4   12.90    7.90
  12   2   4   14.80    8.10
 -12   2  -4    6.60   10.30
 -12   2  -4   11.40    5.00
  13  -2   4  148.39   18.90
  13  -2   4  123.89   19.90
 -13  -2  -4  156.28   18.20
 -13   2  -4  134.29   17.40
 -13   2  -4  122.49   16.60
  13   2   4  141.19   19.80
  13   2   4  168.38   19.00
 -13   2  -4  154.48   21.60
  14  -2   4  236.28   28.80
  14  -2   4  242.28   31.40
 -14  -2  -4  204.58   28.80
 -14   2  -4  260.87   28.30
 -14   2  -4  265.07   27.20
  14   2   4  219.38   29.60
  14   2   4  214.38   29.80
 -14   2  -4  252.67   33.00
 -15  -2  -4    8.30    9.20
  15  -2   4   11.00    9.70
  15  -2   4    4.30   11.70
 -15   2  -4    3.30   14.30
 -15   2  -4   -7.80    7.40
  15   2   4   15.80   11.10
  15   2   4   -4.20    9.70
  16  -2   4   34.80   11.70
 -16  -2  -4   43.10   10.80
  16  -2   4   22.80   13.90
 -16   2  -4   29.30   17.80
  16   2   4   27.50   12.10
 -16   2  -4   56.69   10.30
  16   2   4   35.90   12.70
  17  -2   4   18.40   11.10
 -17  -2  -4   15.00   10.70
  17  -2   4   19.40   14.20
  17   2   4   11.30   13.60
 -17   2  -4   11.90    9.30
 -17   2  -4   29.40   18.10
  17   2   4   21.60   11.80
  18  -2   4   11.40   11.50
  18  -2   4   -4.00   14.00
 -18  -2  -4    0.30   10.70
 -18   2  -4    8.80   19.90
  18   2   4   19.50   15.10
  18   2   4   -5.90   12.40
 -18   2  -4    4.90    9.60
  19  -2   4   70.29   22.10
  19  -2   4   74.39   15.70
 -19  -2  -4   71.69   14.90
  19   2   4   82.99   18.80
 -19   2  -4   78.29   26.40
 -19   2  -4   72.89   14.30
  20  -2   4   20.70   13.20
  20  -2   4   14.00   19.90
 -20  -2  -4   32.20   12.60
  20   2   4   16.20   16.20
 -20   2  -4   26.00   11.60
 -20   2  -4   23.90   23.50
  21  -2   4   88.89   26.00
  21  -2   4  111.89   19.20
 -21  -2  -4   55.99   16.40
 -21   2  -4  121.99   31.90
 -21   2  -4   78.29   17.10
  21   2   4  111.49   21.60
  22  -2   4   16.90   14.50
 -22  -2  -4    7.60   13.20
  22  -2   4   -9.60   21.20
  22   2   4    8.10   19.30
 -22   2  -4   10.20   13.60
 -22   2  -4   50.59   27.90
  23  -2   4   24.60   23.70
 -23  -2  -4   20.30   14.40
 -23   2  -4   56.69   32.20
 -23   2  -4   22.80   14.40
  23   2   4   32.90   21.70
  24  -2   4  -25.90   14.60
  24   2   4   -3.90   21.70
  25  -3  -4    1.10   17.30
 -25  -3   4   23.80   17.10
  25  -3  -4  -28.50   23.20
 -25   3   4    7.30   19.50
  25   3  -4   19.90   22.90
 -24  -3   4   26.90   16.60
  24  -3  -4  -19.80   23.60
  24  -3  -4   26.10   17.10
  24   3  -4   30.60   23.90
 -24   3   4   29.50   16.70
  23  -3  -4  -20.20   21.30
  23  -3  -4   -1.40   16.80
 -23  -3   4   28.70   15.90
 -23   3   4    2.50   15.40
  23   3  -4   -8.40   21.00
  22  -3  -4  222.38   30.10
 -22  -3   4  182.88   28.30
  22  -3  -4  147.39   35.00
  22   3  -4  216.38   31.70
 -22   3   4  275.57   29.10
  21  -3  -4   -8.10   19.80
  21  -3  -4    1.90   13.80
 -21  -3   4   11.60   14.40
 -21   3   4   26.80   15.50
  21   3  -4    7.40   17.50
 -21   3   4   30.00   13.70
  20  -3  -4   74.69   16.20
 -20  -3   4   51.49   16.00
  20  -3  -4   47.50   23.00
 -20   3   4   65.69   15.40
 -20   3   4   80.29   15.00
  20   3  -4   65.19   19.10
  19  -3  -4    7.70   16.90
 -19  -3   4    7.40   13.20
  19  -3  -4   10.90   14.50
  19   3  -4   13.60   16.30
 -19   3   4   15.70   11.80
 -19   3   4    6.30   11.40
  18  -3  -4    7.40   12.60
 -18  -3   4   40.80   13.20
  18  -3  -4   21.40   17.90
  18   3  -4    9.30   16.00
 -18   3   4   41.40   11.10
 -18   3   4   36.90   12.00
  17  -3  -4   16.60   15.80
  17  -3  -4   16.60   11.80
 -17  -3   4   11.10   12.10
 -17   3   4   35.20   10.70
  17   3  -4   22.00   14.50
 -17   3   4   21.40    9.80
 -17   3   4    6.50   19.40
  16  -3  -4  115.39   18.10
  16  -3  -4  110.89   20.90
 -16  -3   4   94.69   17.90
  16   3  -4  107.99   20.00
 -16   3   4  125.79   24.40
 -16   3   4  138.69   17.10
 -16   3   4  122.39   16.80
  15  -3  -4   -8.00    9.60
 -15  -3   4   -3.60   10.10
  15  -3  -4    2.10   13.10
 -15  -3   4    8.80    8.40
 -15   3   4    8.40   15.60
 -15   3   4   12.00    8.00
 -15   3   4    2.70    9.00
  15   3  -4    8.70   12.20
  14  -3  -4    9.40    9.40
 -14  -3   4   17.30   10.30
 -14  -3   4   28.00    7.60
  14  -3  -4   -2.80   12.30
 -14   3   4   28.70    8.90
 -14   3   4   25.90   14.80
  14   3  -4   35.20   12.20
 -14   3   4   23.30    8.10
 -13  -3   4   21.00    6.60
  13  -3  -4   -5.70    8.50
  13  -3  -4    2.40   11.70
 -13   3   4   18.50    8.10
 -13   3   4   19.80   11.70
  13   3  -4    4.50   10.70
 -13   3   4   10.70    7.00
  12  -3  -4   63.99   12.40
 -12  -3   4   74.09   11.00
  12  -3  -4   92.39   15.70
 -12   3   4   66.09   15.60
  12   3  -4   88.99   14.20
  12   3  -4   84.99   14.50
 -12   3   4   72.39   11.70
 -12   3   4   85.39   11.50
 -11  -3   4   30.80    7.60
  11  -3  -4   40.00    9.00
  11  -3  -4   32.80   11.60
 -11   3   4   40.00    8.40
 -11   3   4   27.00   12.70
  11   3  -4   57.69   11.00
 -11   3   4   34.50    7.70
  11   3  -4   31.90   10.60
  10  -3  -4  351.36   37.70
  10  -3  -4  293.47   40.00
 -10  -3   4  346.37   37.40
  10   3  -4  326.47   38.50
 -10   3   4  362.06   37.40
 -10   3   4  350.06   37.70
 -10   3   4  322.17   40.60
  10   3  -4  337.37   38.20
   9  -3  -4   26.80   11.00
  -9  -3   4   46.90    7.70
   9  -3  -4   44.10    8.60
   9   3  -4   34.50    9.50
  -9   3   4   29.80    7.30
  -9   3   4   47.20    8.40
   9   3  -4   57.59   10.20
  -9   3   4   39.40   11.90
  -8  -3   4  319.77   33.80
   8  -3  -4  300.37   33.60
   8  -3  -4  287.87   35.90
  -8   3   4  317.37   33.50
   8   3  -4  307.67   34.20
  -8   3   4  304.67   34.10
   8   3  -4  293.37   34.60
  -8   3   4  290.97   35.60
   7  -3  -4   43.80   10.70
   7  -3  -4   24.80    7.30
  -7  -3   4   35.90    7.20
   7   3  -4   45.20    8.90
  -7   3   4   43.00   11.00
  -7   3   4   41.00    6.60
  -7   3   4   24.20    7.30
   7   3  -4   24.50    8.50
   6  -3  -4  374.46   42.50
   6  -3  -4  381.66   40.30
  -6  -3   4  379.36   40.70
   6   3  -4  368.06   40.80
  -6   3   4  353.46   40.20
  -6   3   4  368.26   40.80
  -6   3   4  365.76   42.30
   6   3  -4  371.66   41.30
  -5  -3   4   13.00    5.70
   5  -3  -4   12.40    8.70
   5  -3  -4   37.60   11.60
   5  -3  -4    6.50    5.00
   5   3  -4   17.00    7.60
  -5   3   4    4.00    5.60
  -5   3   4    9.50    4.50
   5   3  -4    6.30    6.50
  -5   3   4   -4.90    7.90
   4  -3  -4  170.68   19.10
  -4  -3   4  171.28   19.00
   4  -3  -4  169.78   22.20
  -4  -3   4  162.18   20.20
   4  -3  -4  229.88   23.30
  -4   3   4  161.58   20.10
  -4   3   4  165.38   19.20
   4   3  -4  163.08   19.80
  -4   3   4  172.18   21.50
   4   3  -4  144.99   20.70
   3  -3  -4  803.62   83.19
  -3  -3   4  745.93   81.69
   3  -3  -4  779.52   81.49
  -3  -3   4  764.92   81.99
   3  -3  -4  820.72   82.79
   3   3  -4  779.42   81.99
  -3   3   4  748.43   81.59
   3   3  -4  723.53   82.39
  -3   3   4  726.23   81.89
  -3   3   4  759.12   82.49
   2  -3  -4 1637.54  167.28
   2  -3  -4 1568.14  165.98
  -2  -3   4 1584.14  166.48
  -2  -3   4 1611.94  166.38
   2  -3  -4 1593.84  166.98
  -2   3   4 1530.85  166.08
  -2   3   4 1553.74  166.38
   2   3  -4 1414.66  166.78
  -2   3   4 1544.45  166.78
   2   3  -4 1583.24  166.38
   1  -3  -4  517.75   56.29
  -1  -3   4  509.45   55.29
  -1  -3   4  529.25   55.19
   1  -3  -4  498.85   54.39
   1  -3  -4  509.75   55.99
  -1   3   4  517.75   55.09
   1   3  -4  518.35   55.19
  -1   3   4  480.25   54.69
  -1   3   4  516.55   55.39
   1   3  -4  510.65   55.79
   0  -3   4   13.10    5.30
   0  -3  -4    9.10    7.40
   0  -3   4   15.40    5.60
   0  -3  -4   13.90    9.00
   0   3  -4    9.20    5.00
   0   3   4   13.80    5.30
   0   3  -4    3.10    5.40
   0   3   4    0.40    4.10
   0   3  -4    6.10    7.30
   0   3   4   15.70    5.00
  -1  -3  -4  154.78   19.70
   1  -3   4  158.98   18.90
   1  -3   4  162.18   18.50
  -1  -3  -4  158.58   20.50
  -1   3  -4  161.58   18.80
   1   3   4  147.19   17.80
   1   3   4  158.68   18.10
  -1   3  -4  145.79   18.50
  -1   3  -4  147.09   20.00
  -2  -3  -4   11.30    8.90
   2  -3   4   22.80    5.90
   2  -3   4   22.20    6.90
  -2  -3  -4   15.60    3.80
  -2   3  -4   14.50    5.90
  -2   3  -4   15.40    6.00
   2   3   4   22.10    5.20
  -2   3  -4   16.10    8.00
   3  -3   4   11.30    5.50
  -3  -3  -4    9.60    7.00
   3  -3   4    7.40    6.90
  -3   3  -4    8.90    5.90
  -3   3  -4   11.00    8.20
   3   3   4   25.30    3.20
  -3   3  -4    3.90    5.60
  -4  -3  -4   -1.10    7.70
   4  -3   4    9.40    7.10
  -4   3  -4    7.00    5.60
  -4   3  -4   -1.70    8.00
   4   3   4   -2.10    3.10
  -4   3  -4   -4.20    5.20
  -5  -3  -4  114.49   16.20
   5  -3   4   95.79   15.00
  -5   3  -4  123.89   14.20
  -5   3  -4  122.39   14.00
   5   3   4   93.09   13.00
  -5   3  -4  140.99   16.90
   6  -3   4  108.79   16.40
  -6  -3  -4  121.79   17.30
  -6   3  -4  148.99   15.50
  -6   3  -4  124.59   17.50
   6   3   4  110.79   14.50
  -6   3  -4  134.09   15.30
  -7  -3  -4   15.10    8.60
   7  -3   4   24.00    8.20
  -7   3  -4   15.20    5.70
   7   3   4   23.40    5.60
  -7   3  -4   28.70    6.20
  -7   3  -4    0.40    7.60
   8  -3   4   39.90    9.50
  -8  -3  -4   46.80   10.20
   8   3   4   36.70    5.50
   8   3   4   35.60    5.40
  -8   3  -4   41.40   10.80
  -8   3  -4   47.40    7.60
  -8   3  -4   45.70    7.30
   8   3   4   40.80    7.20
   9  -3   4   -3.70    7.50
  -9  -3  -4    1.00    9.00
   9   3   4    0.70    6.70
  -9   3  -4    3.40    5.20
  -9   3  -4   -1.30    8.60
   9   3   4    0.30    5.80
  -9   3  -4   -2.60    5.00
 -10  -3  -4   82.09   13.50
  10  -3   4   58.89   12.70
 -10  -3  -4   62.39   10.80
  10   3   4   69.79   11.60
  10   3   4   63.99   10.90
 -10   3  -4   69.59   10.40
 -10   3  -4   65.19   13.50
 -10   3  -4   89.69   10.50
 -11  -3  -4   19.30    9.80
 -11  -3  -4   14.90    7.80
  11  -3   4   23.50   10.30
 -11   3  -4   19.00    6.80
 -11   3  -4   13.70    9.80
  11   3   4   16.00    7.80
 -11   3  -4   21.20    6.30
  11   3   4   31.10    8.60
  12  -3   4  606.44   70.09
 -12  -3  -4  616.04   69.29
 -12  -3  -4  576.74   68.09
  12   3   4  631.14   68.79
 -12   3  -4  639.34   67.49
  12   3   4  656.83   68.29
 -12   3  -4  646.24   70.49
 -12   3  -4  635.04   67.89
  13  -3   4    2.40   10.90
 -13  -3  -4   11.10    8.90
  13  -3   4    1.60    9.30
 -13   3  -4   16.60    6.50
 -13   3  -4    8.80   12.80
  13   3   4    8.30    9.00
  13   3   4   18.40   10.40
 -13   3  -4   21.40    7.30
 -14  -3  -4  334.47   40.50
  14  -3   4  309.77   40.30
  14  -3   4  390.26   43.30
 -14   3  -4  367.96   39.90
  14   3   4  407.36   41.30
  14   3   4  321.87   41.20
 -14   3  -4  350.06   39.00
 -14   3  -4  369.86   45.00
  15  -3   4   -1.30    9.90
 -15  -3  -4   -7.30   10.00
  15  -3   4    2.80   13.20
 -15   3  -4    2.50    7.50
 -15   3  -4    1.20    7.90
  15   3   4  -11.70    9.70
  15   3   4   35.50   12.00
 -15   3  -4    8.40   16.30
 -16  -3  -4   14.60   10.90
  16  -3   4    2.40   10.30
  16  -3   4   17.70   15.00
 -16   3  -4   -3.40   17.70
 -16   3  -4    3.60    8.90
  16   3   4   17.30   13.00
 -17  -3  -4   96.79   16.50
  17  -3   4   88.79   16.70
  17  -3   4   87.99   20.20
 -17   3  -4  104.99   16.10
  17   3   4  113.79   19.50
 -17   3  -4  116.29   25.40
  18  -3   4   23.90   12.00
 -18  -3  -4   14.20   12.20
  18  -3   4   13.30   17.00
  18   3   4   32.30   15.90
 -18   3  -4   18.90   11.10
 -18   3  -4   34.60   22.50
 -19  -3  -4   66.99   15.30
  19  -3   4   42.90   20.60
  19  -3   4   54.19   15.40
  19   3   4   95.79   19.10
 -19   3  -4   47.90   14.20
 -19   3  -4   94.29   27.80
  20  -3   4    5.30   12.50
 -20  -3  -4   19.90   13.20
  20  -3   4  -14.10   18.70
  20   3   4  -10.90   17.30
 -20   3  -4    7.40   25.70
 -20   3  -4   15.50   13.00
 -21  -3  -4    1.90   13.40
  21  -3   4   19.40   15.00
  21  -3   4    5.40   21.40
 -21   3  -4   21.40   27.30
  21   3   4   -8.60   19.50
 -21   3  -4    6.50   13.60
  22  -3   4    9.40   14.50
 -22  -3  -4   24.40   14.00
  22  -3   4  -21.80   21.50
 -22   3  -4   16.20   29.10
 -22   3  -4   13.30   13.50
  23  -3   4   -8.10   24.70
  23  -3   4    7.20   14.80
 -23  -3  -4    3.80   14.30
 -23   3  -4   33.60   31.20
 -23   3  -4    4.80   14.50
  24  -4  -4   46.00   21.20
  24  -4  -4   69.79   30.50
 -24   4   4   95.99   24.90
  24   4  -4  158.78   28.40
  23  -4  -4  -14.80   22.50
 -23   4   4   25.30   17.10
  23   4  -4   50.39   22.80
  22  -4  -4    2.50   25.50
 -22   4   4   20.20   14.60
  22   4  -4    5.70   21.10
  21  -4  -4   25.00   24.80
  21   4  -4   93.39   23.90
 -21   4   4  112.99   18.40
 -21   4   4  100.29   18.20
  20  -4  -4  138.49   25.30
  20  -4  -4  120.29   30.80
 -20   4   4  158.98   25.70
 -20   4   4  241.68   26.00
  20   4  -4  200.08   29.50
  19  -4  -4   11.80   14.10
  19  -4  -4   -9.60   19.60
 -19   4   4   -2.40   13.40
 -19   4   4    8.30   24.90
 -19   4   4   31.40   12.60
  19   4  -4   26.40   18.20
  18  -4  -4  313.07   47.20
  18  -4  -4  279.37   41.60
 -18   4   4  406.86   51.09
 -18   4   4  398.56   41.50
  18   4  -4  368.26   45.20
 -18   4   4  351.16   41.70
  17  -4  -4  -15.40   17.40
  17  -4  -4    6.20   12.00
 -17   4   4   18.40   11.50
 -17   4   4    5.90   20.90
 -17   4   4   13.70   10.70
  17   4  -4   17.50   16.00
  16  -4  -4   29.70   12.40
  16  -4  -4   34.00   17.70
 -16   4   4   41.10   12.40
 -16   4   4   53.69   21.30
  16   4  -4   22.10   15.70
 -16   4   4   19.40   10.50
  16   4  -4   54.69   16.60
  15  -4  -4  174.48   23.30
  15  -4  -4  139.19   26.50
 -15   4   4  159.78   22.00
 -15   4   4  195.88   23.30
 -15   4   4  209.38   30.10
  15   4  -4  179.98   25.10
  15   4  -4  172.98   25.40
  14  -4  -4    2.20   10.00
  14  -4  -4   -0.80   14.30
 -14   4   4   15.20   16.90
 -14   4   4    1.20    9.60
 -14   4   4   14.10    8.60
  14   4  -4   -0.90   13.10
  14   4  -4    7.70   12.10
  13  -4  -4   10.00    9.70
  13  -4  -4    3.10   13.20
 -13   4   4    4.80    9.30
 -13   4   4  -39.10   13.40
  13   4  -4    9.40   11.40
 -13   4   4   -7.60    7.30
  13   4  -4   -2.20   11.50
  12  -4  -4   -4.10    8.50
 -12  -4   4   -3.10    6.90
  12  -4  -4    9.40   12.80
 -12   4   4   -8.30    8.20
  12   4  -4    4.20   10.70
 -12   4   4    7.80   13.40
 -12   4   4   -8.60    7.00
  12   4  -4    0.70   11.30
  11  -4  -4   11.10   13.00
 -11  -4   4   60.79    9.60
  11  -4  -4   59.19   10.40
 -11   4   4   44.80    9.10
 -11   4   4   26.70   12.80
  11   4  -4   58.59   11.80
  11   4  -4   44.70   12.10
 -11   4   4   49.70   10.10
 -10  -4   4    6.70    7.10
  10  -4  -4   12.10    7.70
  10  -4  -4  -11.40   11.00
 -10   4   4   18.20    7.80
 -10   4   4   -0.90   11.40
 -10   4   4   16.50    6.50
  10   4  -4   -8.40    9.20
  10   4  -4    2.70    8.90
  -9  -4   4  130.09   16.00
   9  -4  -4   95.39   18.50
   9  -4  -4  136.79   16.10
   9   4  -4  127.19   18.00
  -9   4   4  110.19   19.20
   9   4  -4  140.69   17.00
  -9   4   4  130.89   15.60
  -9   4   4  121.99   16.20
  -8  -4   4  228.08   24.60
   8  -4  -4  211.08   28.20
   8  -4  -4  215.68   24.20
  -8   4   4  185.38   24.60
  -8   4   4  202.88   27.90
  -8   4   4  207.38   23.90
   8   4  -4  198.58   25.40
   8   4  -4  213.48   24.90
   7  -4  -4  160.88   20.00
  -7  -4   4  172.08   20.80
   7  -4  -4  177.58   23.00
  -7   4   4  158.08   20.90
  -7   4   4  163.38   19.90
   7   4  -4  165.78   21.70
   7   4  -4  171.08   20.90
  -7   4   4  201.88   24.20
   6  -4  -4 1198.88  120.29
  -6  -4   4 1101.59  118.29
   6  -4  -4 1078.89  119.39
   6  -4  -4 1110.99  117.89
   6   4  -4 1090.99  118.19
  -6   4   4 1144.59  119.49
   6   4  -4 1059.89  118.59
  -6   4   4 1095.39  117.89
  -6   4   4 1072.09  118.29
  -5  -4   4  190.48   22.30
   5  -4  -4  212.48   27.50
   5  -4  -4  214.78   26.20
  -5  -4   4  181.38   21.90
   5  -4  -4  193.48   22.50
  -5  -4   4  216.78   23.50
  -5   4   4  203.58   22.60
  -5   4   4  215.18   25.90
   5   4  -4  197.18   24.50
   5   4  -4  200.68   23.30
  -5   4   4  202.28   23.60
   4  -4  -4 1325.17  136.09
   4  -4  -4 1241.98  135.49
  -4  -4   4 1285.37  134.69
   4  -4  -4 1283.37  134.09
  -4  -4   4 1264.57  134.29
  -4   4   4 1204.48  134.19
   4   4  -4 1251.97  134.49
   4   4  -4 1193.78  134.89
  -4   4   4 1294.97  135.39
  -4   4   4 1251.17  134.59
  -3  -4   4  321.97   36.20
   3  -4  -4  353.56   37.70
  -3  -4   4  324.97   35.80
   3  -4  -4  385.16   39.60
   3   4  -4  308.87   36.00
  -3   4   4  317.07   37.00
   3   4  -4  304.07   37.10
  -3   4   4  288.07   35.30
  -3   4   4  332.87   36.20
  -2  -4   4  497.75   52.49
   2  -4  -4  473.45   53.59
   2  -4  -4  499.45   54.09
  -2  -4   4  530.05   52.39
  -2   4   4  461.35   52.29
  -2   4   4  440.26   51.79
  -2   4   4  466.25   52.79
   2   4  -4  512.95   52.39
   2   4  -4  441.96   52.99
  -1  -4   4   -2.90    6.00
  -1  -4   4   14.20    6.80
   1  -4  -4   -4.20    8.70
   1  -4  -4  -15.90    9.90
  -1   4   4  -10.70    5.00
   1   4  -4   -9.00    8.20
   1   4  -4    2.60    6.70
  -1   4   4   -4.40    6.00
  -1   4   4    5.10    6.60
   0  -4   4  722.63   80.79
   0  -4  -4  757.02   81.99
   0  -4   4  772.22   80.99
   0  -4  -4  754.32   81.49
   0   4  -4  730.43   80.59
   0   4   4  732.43   80.69
   0   4  -4  719.13   80.79
   0   4   4  777.12   80.29
   0   4  -4  737.93   81.49
   0   4   4  784.22   80.69
  -1  -4  -4  213.08   26.70
  -1  -4  -4  238.98   27.70
   1  -4   4  256.67   26.60
  -1  -4  -4  203.38   23.80
  -1   4  -4  230.98   25.80
  -1   4  -4  222.08   25.40
   1   4   4  199.48   24.90
   1   4   4  227.98   25.40
  -1   4  -4  219.68   27.10
  -2  -4  -4  648.44   68.69
  -2  -4  -4  642.74   69.09
   2  -4   4  642.14   68.69
  -2   4  -4  618.14   68.19
   2   4   4  685.83   67.99
  -2   4  -4  647.74   69.19
   2   4   4  547.25   67.49
  -2   4  -4  628.84   67.99
  -3  -4  -4   62.49    9.90
   3  -4   4   94.59   13.10
  -3  -4  -4   92.59   14.10
  -3   4  -4   93.89   12.30
  -3   4  -4   85.89   14.20
   3   4   4   67.49   10.40
  -3   4  -4  117.99   12.20
   3   4   4  114.29   11.70
   4  -4   4   36.30    9.40
  -4  -4  -4   31.30    9.50
   4   4   4   33.10    4.90
  -4   4  -4   23.00    7.40
  -4   4  -4   25.70    7.60
  -4   4  -4   27.40    9.20
  -5  -4  -4  132.69   19.80
   5  -4   4  118.59   18.30
  -5   4  -4  165.28   20.10
  -5   4  -4  148.49   17.50
   5   4   4  137.39   15.60
  -5   4  -4  137.59   17.30
   6  -4   4   22.50    9.90
  -6  -4  -4   43.30   10.40
  -6   4  -4   44.30   10.60
  -6   4  -4   44.70    8.60
   6   4   4   50.39    6.60
  -6   4  -4   48.00    8.40
  -7  -4  -4    8.80    9.30
   7  -4   4   -3.10    8.30
  -7   4  -4    2.40    9.40
  -7   4  -4    3.70    6.00
  -7   4  -4   -4.60    6.20
   7   4   4   13.70    5.00
  -8  -4  -4   33.40   10.30
   8  -4   4   28.70   10.50
  -8   4  -4   30.60    8.00
   8   4   4   33.40    7.20
  -8   4  -4   34.20   11.90
  -8   4  -4   48.40    8.20
   9  -4   4   21.40   10.70
  -9  -4  -4   38.00   10.40
  -9   4  -4   36.30    8.00
   9   4   4   36.50    8.00
  -9   4  -4   34.20   12.00
  -9   4  -4   25.40    8.30
 -10  -4  -4   90.49   14.80
  10  -4   4   69.29   15.10
 -10   4  -4   75.99   12.30
 -10   4  -4   88.19   12.60
 -10   4  -4   89.19   16.70
  10   4   4   91.89   12.80
 -11  -4  -4   54.49   12.70
  11  -4   4   32.10   12.90
 -11   4  -4   53.29   15.20
  11   4   4   51.49   11.50
 -11   4  -4   52.99   10.00
 -11   4  -4   79.49   10.90
  11   4   4   79.99   11.50
  12  -4   4  133.39   24.80
 -12  -4  -4  160.58   23.60
 -12   4  -4  184.18   22.50
  12   4   4  210.68   23.80
 -12   4  -4  190.68   22.10
 -12   4  -4  178.48   25.30
  12   4   4  186.78   24.30
  13  -4   4  175.08   25.20
 -13  -4  -4  144.89   22.70
  13   4   4  192.28   22.60
 -13   4  -4  177.38   21.40
 -13   4  -4  162.88   21.20
 -13   4  -4  191.18   27.60
  14  -4   4   68.19   21.70
  14  -4   4  145.89   20.00
 -14   4  -4  156.08   18.10
 -14   4  -4  169.08   26.90
  14   4   4  151.58   20.70
 -14   4  -4  145.99   18.60
  15  -4   4   30.50   15.40
  15  -4   4   21.00   12.80
 -15   4  -4   26.90    9.20
 -15   4  -4   18.70   18.80
  15   4   4   24.70   13.30
 -15   4  -4   44.20   10.20
  16  -4   4  356.76   46.40
  16  -4   4  355.86   50.69
 -16   4  -4  380.36   46.10
 -16   4  -4  437.86   54.29
 -16   4  -4  482.85   46.50
  17  -4   4   -4.30   15.30
  17  -4   4   -3.40   11.40
 -17   4  -4    4.30   10.90
 -17   4  -4   16.70   22.70
  18  -4   4   58.39   21.20
  18  -4   4   65.99   16.30
 -18   4  -4   99.99   27.90
 -18   4  -4   83.49   15.20
  19  -4   4    0.10   20.00
  19  -4   4   18.10   13.40
 -19   4  -4   12.80   26.90
 -19   4  -4   12.90   13.00
  20  -4   4   10.60   13.80
  20  -4   4  -23.60   19.60
 -20   4  -4   60.39   29.60
 -20   4  -4  -12.40   12.90
  21  -4   4   -6.10   14.00
  21  -4   4  -20.80   19.00
 -21   4  -4    3.90   15.20
 -21   4  -4   -1.10   30.20
  22  -4   4  -32.60   21.20
  22  -4   4  -29.60   15.30
 -22   4  -4   -0.60   16.60
 -22   4  -4   27.30   32.70
  23  -5  -4    3.20   17.60
  23  -5  -4  -42.70   28.50
 -23   5   4    8.10   18.40
  22  -5  -4  -33.40   20.40
  22   5  -4   34.70   24.30
 -22   5   4  -20.50   18.80
  21  -5  -4  -20.30   21.00
 -21   5   4    7.30   30.70
 -21   5   4   27.60   15.90
  21   5  -4   22.20   21.80
 -21   5   4   -5.10   17.00
  20  -5  -4    7.40   24.00
 -20   5   4    3.40   28.70
 -20   5   4   17.60   15.70
 -20   5   4   14.40   16.90
  20   5  -4   20.70   20.40
  19  -5  -4   86.69   28.00
 -19   5   4  108.79   20.30
 -19   5   4   78.99   31.10
  19   5  -4  134.29   24.10
 -19   5   4   95.49   19.00
  18  -5  -4   -5.50   20.60
 -18   5   4   -4.40   12.80
 -18   5   4    3.70   25.10
 -18   5   4  -14.30   13.50
  18   5  -4   28.20   18.60
  17  -5  -4   72.19   24.20
  17  -5  -4   91.19   20.80
  17   5  -4   77.19   20.80
 -17   5   4   89.89   17.00
 -17   5   4  115.39   17.80
 -17   5   4   81.89   25.10
  16  -5  -4   -6.40   18.80
  16  -5  -4   -4.40   14.40
 -16   5   4   -6.20   10.80
 -16   5   4    3.80   13.30
  16   5  -4   21.80   15.90
 -16   5   4   23.00   21.70
  15  -5  -4  -31.40   16.30
  15  -5  -4    5.70   13.50
 -15   5   4    9.70   12.40
 -15   5   4   10.50   20.30
  15   5  -4  -16.10   14.60
 -15   5   4   11.70   10.90
  14  -5  -4  175.38   23.80
  14  -5  -4  138.39   26.70
  14   5  -4  146.49   24.00
 -14   5   4  203.88   24.10
 -14   5   4  168.88   22.60
 -14   5   4  178.58   29.80
  13  -5  -4    2.50   15.40
  13  -5  -4   15.00   11.20
 -13   5   4   15.10    9.80
  13   5  -4   11.70   11.80
  13   5  -4    0.40   12.60
 -13   5   4   41.50   19.20
 -13   5   4    6.50   11.30
  12  -5  -4  474.35   50.79
  12  -5  -4  379.26   54.09
 -12   5   4  500.45   50.59
  12   5  -4  420.86   51.29
 -12   5   4  481.35   55.99
 -12   5   4  473.55   51.39
  12   5  -4  429.86   51.39
  11  -5  -4  113.99   23.80
  11  -5  -4  172.98   20.40
  11   5  -4  158.38   21.40
 -11   5   4  185.78   26.50
  11   5  -4  141.19   20.80
 -11   5   4  129.09   19.30
 -11   5   4  179.78   21.20
  10  -5  -4   11.00    8.90
  10  -5  -4  -13.30   13.20
 -10   5   4   10.70    8.00
  10   5  -4   11.80   10.60
  10   5  -4    9.30   10.40
 -10   5   4   16.90    9.40
 -10   5   4    9.10   14.60
   9  -5  -4   16.60    8.20
   9  -5  -4    1.30   13.20
  -9   5   4   -1.00    7.00
   9   5  -4   -9.20    9.60
  -9   5   4   11.40   13.70
   9   5  -4    0.30    9.20
  -9   5   4   -2.90    8.40
   8  -5  -4   94.39   12.50
   8  -5  -4   41.80   16.10
   8   5  -4   90.79   13.30
  -8   5   4   80.79   13.30
  -8   5   4   88.09   17.50
  -8   5   4   79.59   11.90
   8   5  -4   84.59   14.00
   7  -5  -4   28.80    8.10
   7  -5  -4    5.90   12.70
   7  -5  -4   29.10   17.70
   7   5  -4   31.50   10.00
   7   5  -4   31.30    8.90
  -7   5   4   46.10    7.70
  -7   5   4   18.80   12.30
  -7   5   4   10.80    8.60
   6  -5  -4  176.68   20.10
  -6  -5   4  171.48   19.30
   6  -5  -4  156.68   23.40
   6  -5  -4  170.28   25.90
  -6  -5   4  147.29   18.70
  -6   5   4  177.58   20.20
   6   5  -4  164.78   20.80
  -6   5   4  185.58   21.60
   6   5  -4  172.88   22.20
  -6   5   4  202.78   24.80
   5  -5  -4  440.56   53.09
  -5  -5   4  454.65   50.59
   5  -5  -4  459.15   54.19
   5  -5  -4  487.05   50.29
  -5  -5   4  443.46   50.39
  -5   5   4  467.25   51.39
  -5   5   4  485.75   52.79
   5   5  -4  506.45   52.09
  -5   5   4  466.55   50.59
   5   5  -4  437.06   50.89
   4  -5  -4    1.80   13.80
  -4  -5   4   -9.50    7.50
  -4  -5   4    7.00    7.30
   4  -5  -4   28.40   11.30
  -4   5   4    9.80    6.10
  -4   5   4   10.30   10.00
   4   5  -4   23.90    8.80
   4   5  -4   25.20    8.20
  -4   5   4   19.00    7.80
  -3  -5   4  354.26   39.10
   3  -5  -4  350.06   40.90
   3  -5  -4  321.27   41.50
  -3   5   4  328.97   40.00
  -3   5   4  373.66   38.30
   3   5  -4  322.47   40.10
   3   5  -4  351.46   38.70
  -3   5   4  358.16   39.20
   2  -5  -4    3.90   10.10
   2  -5  -4   -0.50   12.30
  -2  -5   4   10.70    7.90
  -2   5   4    0.60    8.50
  -2   5   4    1.10    7.20
   2   5  -4   18.60    9.70
  -2   5   4    5.50    6.10
   1  -5  -4   34.80   11.80
   1  -5  -4   25.80   12.70
  -1  -5   4   35.20    9.50
   1   5  -4   30.00    8.20
  -1   5   4   39.20    7.80
   1   5  -4   34.80   10.80
   1   5  -4   33.90    8.90
  -1   5   4   29.80    8.70
  -1   5   4   41.70    9.60
   0  -5  -4   25.30   11.50
   0  -5   4    1.20    8.60
   0  -5  -4   11.40   10.40
   0   5   4    7.40    7.30
   0   5   4    7.60    7.40
   0   5  -4   21.40    7.30
   0   5  -4    9.90    9.80
   0   5   4   10.60    6.40
   0   5  -4    2.80    7.20
  -1  -5  -4  156.58   20.50
   1  -5   4  125.79   18.10
  -1  -5  -4  141.89   20.10
  -1   5  -4  145.19   17.20
   1   5   4  107.29   17.20
   1   5   4  137.19   17.30
  -1   5  -4  135.99   19.20
   1   5   4  136.09   16.90
  -1   5  -4  137.29   17.70
  -2  -5  -4   24.10   10.50
  -2  -5  -4   20.90   11.20
   2  -5   4   25.00    9.80
   2   5   4   15.30    6.50
  -2   5  -4   23.90    7.90
  -2   5  -4   33.20   11.10
  -2   5  -4   19.60    7.80
   2   5   4   18.40    7.70
   3  -5   4   27.70   10.30
  -3  -5  -4   23.10   11.20
  -3   5  -4   42.30   12.10
   3   5   4   28.70    8.40
   3   5   4   28.70    6.30
  -3   5  -4   29.10    8.30
  -3   5  -4   19.70    8.20
  -4  -5  -4   23.40   11.30
   4  -5   4   17.00    9.80
   4   5   4    7.30    7.40
  -4   5  -4    8.90    7.40
   4   5   4    5.10    4.70
  -4   5  -4   18.80    8.00
  -4   5  -4   19.80   11.00
   5  -5   4   79.99   15.10
  -5  -5  -4   92.09   15.10
  -5   5  -4   71.59   15.30
   5   5   4   91.19   11.40
  -5   5  -4   90.19   13.00
  -5   5  -4  111.49   14.70
   6  -5   4  269.87   38.20
  -6  -5  -4  324.67   37.80
  -6   5  -4  319.37   38.40
   6   5   4  335.07   34.80
  -6   5  -4  311.17   36.60
  -6   5  -4  329.97   36.00
   7  -5   4   94.79   19.20
  -7  -5  -4  141.79   20.60
  -7   5  -4  120.89   20.00
  -7   5  -4  128.89   17.80
  -7   5  -4  169.78   17.70
   7   5   4  140.09   17.00
   8  -5   4  196.58   28.80
  -8  -5  -4  198.28   27.40
  -8   5  -4  219.88   26.00
  -8   5  -4  231.08   25.60
  -8   5  -4  208.48   28.70
  -9  -5  -4  176.58   26.10
   9  -5   4  212.78   27.80
  -9   5  -4  213.98   25.60
  -9   5  -4  209.08   25.20
  -9   5  -4  241.38   30.90
 -10  -5  -4   13.60   11.70
  10  -5   4   34.50   13.30
 -10   5  -4   55.09   10.30
 -10   5  -4   47.20   10.70
 -10   5  -4   41.60   16.20
 -11  -5  -4  119.69   24.30
  11  -5   4   92.69   20.40
 -11   5  -4  132.89   23.10
 -11   5  -4  143.29   18.10
 -11   5  -4  127.59   17.30
  12  -5   4  147.09   26.70
 -12   5  -4  177.18   29.40
 -12   5  -4  206.88   24.40
 -12   5  -4  229.78   25.00
  13  -5   4   58.89   18.80
 -13   5  -4  105.39   15.30
 -13   5  -4   98.19   23.40
 -13   5  -4   90.39   14.40
  14  -5   4    1.40   12.20
  14  -5   4    3.90   15.50
 -14   5  -4   -2.40    8.90
 -14   5  -4   11.10   17.50
 -14   5  -4   -7.50   10.00
  15  -5   4   83.39   21.50
  15  -5   4  121.39   19.30
 -15   5  -4  122.79   17.40
 -15   5  -4  118.79   17.70
 -15   5  -4  173.08   29.80
  16  -5   4   15.60   12.40
  16  -5   4   -9.70   17.50
 -16   5  -4    9.50   11.70
 -16   5  -4   -1.00    9.70
 -16   5  -4   22.20   23.80
  17  -5   4  148.69   32.10
  17  -5   4  261.37   31.40
 -17   5  -4  249.97   30.50
 -17   5  -4  329.27   43.00
  18  -5   4  -15.90   19.60
  18  -5   4   17.80   14.50
 -18   5  -4   20.10   28.10
 -18   5  -4    1.10   15.20
  19  -5   4   35.60   16.30
  19  -5   4   -1.30   21.00
 -19   5  -4   80.59   33.30
 -19   5  -4   53.39   15.60
  20  -5   4  -24.80   20.00
  20  -5   4   -8.90   14.90
 -20   5  -4   -9.40   15.50
 -20   5  -4  -22.40   30.00
  21  -5   4    8.30   16.10
  21  -5   4  -43.00   24.10
 -21   5  -4  -15.90   18.20
 -21   5  -4   41.00   36.80
  21  -6  -4   57.09   28.40
 -21   6   4  106.69   23.20
 -21   6   4   93.49   21.00
  20  -6  -4   31.30   30.00
 -20   6   4   49.70   34.10
 -20   6   4   13.50   18.30
 -20   6   4    3.80   19.20
  19  -6  -4   -7.60   24.80
  19  -6  -4    2.00   20.10
 -19   6   4  -24.10   19.00
 -19   6   4    2.90   15.40
 -19   6   4   25.60   31.70
  18  -6  -4   -1.80   23.50
  18  -6  -4   -6.00   17.30
 -18   6   4  -15.80   16.30
 -18   6   4    7.00   16.20
 -18   6   4  -23.70   28.00
  17  -6  -4   34.00   16.40
  17  -6  -4   -0.20   23.50
 -17   6   4   25.10   14.90
 -17   6   4   22.50   16.60
  17   6  -4   22.60   20.70
 -17   6   4   43.50   30.30
  16  -6  -4   55.29   17.20
  16  -6  -4   21.80   23.10
 -16   6   4   82.09   18.70
 -16   6   4   71.99   28.90
 -16   6   4   56.19   16.70
  16   6  -4   65.39   18.30
  15  -6  -4   51.79   17.50
  15  -6  -4   33.70   21.00
 -15   6   4   59.79   16.90
 -15   6   4   69.29   16.70
  15   6  -4   55.99   17.20
 -15   6   4   76.49   28.10
  14  -6  -4   27.80   20.50
  14  -6  -4  110.49   19.60
 -14   6   4  116.39   17.50
  14   6  -4  103.69   18.30
 -14   6   4   91.89   19.40
 -14   6   4  107.39   28.10
  13  -6  -4   94.39   18.30
  13  -6  -4   72.99   23.60
 -13   6   4  122.79   20.00
  13   6  -4  109.19   18.50
 -13   6   4   94.69   18.50
 -13   6   4  114.79   26.90
  12  -6  -4   68.09   15.10
  12  -6  -4   45.70   19.60
 -12   6   4   81.49   16.10
  12   6  -4   78.59   15.30
 -12   6   4   58.89   14.20
 -12   6   4   86.79   23.10
  11  -6  -4   42.20   19.40
  11  -6  -4   90.49   14.70
 -11   6   4   67.09   15.70
 -11   6   4   91.89   22.30
 -11   6   4   68.49   14.20
  11   6  -4   78.59   15.10
  10  -6  -4   25.90   10.90
  10  -6  -4    6.50   16.50
  10   6  -4   19.10   12.40
 -10   6   4   10.10   10.40
 -10   6   4   28.50   18.00
  10   6  -4   14.10   11.10
 -10   6   4   20.80   12.60
   9  -6  -4   65.29   18.50
   9  -6  -4   54.09   23.40
   9  -6  -4   53.29   12.00
  -9   6   4   52.19   18.90
   9   6  -4   47.90   13.30
  -9   6   4   52.69   13.50
  -9   6   4   60.39   11.90
   9   6  -4   57.29   12.60
   8  -6  -4   76.79   11.80
   8  -6  -4   65.09   22.90
   8  -6  -4   20.60   16.80
  -8   6   4   41.40   13.30
  -8   6   4   36.90   17.80
   8   6  -4   44.90   13.20
   8   6  -4   48.60   11.90
  -8   6   4   43.10   11.00
   7  -6  -4   61.89   22.30
   7  -6  -4   58.09   11.50
   7  -6  -4   52.69   17.70
  -7   6   4   79.49   18.00
  -7   6   4   70.39   12.60
   7   6  -4   84.69   13.30
  -7   6   4   54.79   13.50
   7   6  -4   70.29   14.60
   6  -6  -4   -7.70   19.10
   6  -6  -4   10.00    7.70
   6  -6  -4    2.50   14.00
   6   6  -4   20.00    9.70
   6   6  -4   -4.30   10.60
  -6   6   4    9.40   14.30
  -6   6   4   16.20    8.20
  -6   6   4   13.10   10.50
   5  -6  -4  138.89   16.60
   5  -6  -4  112.49   24.70
  -5  -6   4  114.99   17.30
   5  -6  -4  101.39   21.80
  -5   6   4  143.59   19.20
   5   6  -4  123.59   19.40
   5   6  -4  145.29   18.10
  -5   6   4  149.19   21.70
  -5   6   4  142.49   17.20
   4  -6  -4  129.69   24.50
  -4  -6   4  124.79   18.30
  -4  -6   4  108.29   18.20
   4  -6  -4  120.39   21.70
  -4   6   4  163.68   21.20
   4   6  -4  147.39   18.00
  -4   6   4  123.29   17.40
   4   6  -4  148.89   19.80
  -4   6   4  128.79   18.60
  -3  -6   4  491.75   62.49
  -3  -6   4  542.25   62.09
   3  -6  -4  470.85   63.89
   3  -6  -4  579.34   66.29
   3   6  -4  502.45   61.29
   3   6  -4  647.54   62.79
  -3   6   4  598.44   61.99
  -3   6   4  584.64   60.99
  -3   6   4  598.74   62.79
  -2  -6   4  230.68   30.30
   2  -6  -4  228.48   31.80
   2  -6  -4  214.28   32.40
  -2   6   4  214.08   27.70
   2   6  -4  223.68   28.60
  -2   6   4  237.38   28.80
  -2   6   4  244.98   30.20
   2   6  -4  256.57   30.80
   2   6  -4  233.18   27.80
   1  -6  -4  462.55   53.99
  -1  -6   4  465.35   51.39
   1  -6  -4  407.36   52.19
   1   6  -4  553.54   52.09
   1   6  -4  421.16   50.09
  -1   6   4  417.36   50.69
  -1   6   4  420.96   49.40
   1   6  -4  413.36   49.60
  -1   6   4  453.65   50.49
   0  -6  -4  105.09   21.70
   0  -6  -4  113.19   19.40
   0  -6   4  118.89   18.50
   0   6   4  114.09   16.80
   0   6  -4  108.39   16.00
   0   6   4  108.89   16.40
   0   6  -4  105.59   16.40
   0   6   4  108.29   15.70
   0   6  -4  136.99   19.70
  -1  -6  -4   16.80   13.00
  -1  -6  -4   22.30   14.90
   1  -6   4  -17.50   10.90
   1   6   4    5.50    8.40
  -1   6  -4    5.60   12.20
  -1   6  -4    3.30    8.70
  -1   6  -4   -1.00    8.20
   1   6   4    4.50    8.20
   1   6   4    1.30    9.50
   2  -6   4   -2.50   11.60
  -2  -6  -4   12.70   13.70
  -2  -6  -4   -1.40   12.40
  -2   6  -4    7.70    9.70
   2   6   4    7.20    7.80
   2   6   4   10.80    9.70
  -2   6  -4    7.80   12.60
  -2   6  -4    8.20    8.90
   2   6   4    7.50    9.00
  -3  -6  -4   23.50   12.50
  -3  -6  -4   28.50   13.40
   3  -6   4   16.90   12.70
  -3   6  -4   17.00   10.10
  -3   6  -4    9.30   14.30
  -3   6  -4   15.70    9.10
   3   6   4   24.00   10.30
  -4  -6  -4  114.59   18.80
   4  -6   4   89.79   18.40
  -4   6  -4  105.49   15.80
  -4   6  -4  122.39   20.00
  -4   6  -4  119.29   17.00
   4   6   4   89.19   16.10
   5  -6   4   64.59   16.20
  -5  -6  -4   77.89   15.20
  -5   6  -4   66.79   12.60
   5   6   4   71.89   13.80
  -5   6  -4   62.19   13.90
  -5   6  -4   87.79   18.20
   6  -6   4  265.37   37.10
  -6  -6  -4  279.97   34.30
  -6   6  -4  271.77   33.20
  -6   6  -4  272.87   34.40
  -6   6  -4  335.37   38.90
   6   6   4  267.17   34.10
   7  -6   4   10.20   13.90
  -7  -6  -4   34.90   13.00
  -7   6  -4    8.00   16.10
  -7   6  -4   15.30   11.10
  -7   6  -4   18.10    9.50
   8  -6   4   33.40   15.50
  -8   6  -4   41.50   17.30
  -8   6  -4   40.40   11.00
  -8   6  -4   51.89   12.80
   9  -6   4   12.70   15.40
  -9   6  -4   80.09   19.50
  -9   6  -4   33.80   12.30
  -9   6  -4   43.70   10.90
  10  -6   4   -0.90   15.10
 -10   6  -4   11.90   11.10
 -10   6  -4   19.30   17.90
 -10   6  -4   -1.60   11.60
  11  -6   4  190.08   32.40
 -11   6  -4  245.58   29.40
 -11   6  -4  232.48   30.10
 -11   6  -4  275.17   36.80
  12  -6   4  -17.30   15.70
 -12   6  -4    7.60   20.20
 -12   6  -4    5.20   12.10
 -12   6  -4   11.00   10.10
  13  -6   4   77.69   22.20
 -13   6  -4   89.39   18.80
 -13   6  -4  145.99   29.30
 -13   6  -4  172.28   20.70
  14  -6   4  -15.10   17.20
  14  -6   4    4.50   13.60
 -14   6  -4   -4.20   12.90
 -14   6  -4    3.90   23.70
 -14   6  -4  -17.50    9.90
  15  -6   4  -19.90   18.50
  15  -6   4    1.10   13.60
 -15   6  -4    8.40   25.10
 -15   6  -4  -16.80   12.90
 -15   6  -4   14.30   11.30
  16  -6   4  -10.10   18.50
  16  -6   4   13.40   15.00
 -16   6  -4  -23.70   22.30
 -16   6  -4    5.70   11.40
 -16   6  -4   17.30   14.40
  17  -6   4   43.20   21.50
 -17   6  -4  167.98   38.30
 -17   6  -4   86.09   18.60
  18  -6   4  146.69   26.50
  18  -6   4  107.79   31.10
 -18   6  -4  167.68   40.40
 -18   6  -4  190.58   26.90
  19  -6   4  -12.40   20.00
  19  -6   4   28.30   17.60
 -19   6  -4   12.40   18.60
 -19   6  -4   47.20   34.80
  19  -7  -4  -37.20   26.10
 -19   7   4   -9.10   19.80
 -19   7   4   25.10   36.00
  18  -7  -4    0.10   26.60
 -18   7   4   50.69   18.10
 -18   7   4   39.20   34.40
 -18   7   4    9.80   19.30
  17  -7  -4   25.50   25.60
 -17   7   4   90.49   37.10
 -17   7   4   72.49   21.30
  16  -7  -4  -14.70   21.10
 -16   7   4   10.50   15.80
 -16   7   4   14.90   32.20
 -16   7   4    2.50   18.20
  15  -7  -4   38.10   21.90
 -15   7   4   94.69   20.50
 -15   7   4   82.29   32.80
 -15   7   4   57.79   20.10
  14  -7  -4   99.09   28.70
 -14   7   4  108.79   22.50
 -14   7   4  166.98   35.50
 -14   7   4  147.19   24.90
  13  -7  -4   25.00   18.30
  13  -7  -4    7.10   20.90
 -13   7   4   26.90   16.90
 -13   7   4   17.30   26.10
 -13   7   4   30.60   18.00
  12  -7  -4  131.09   32.40
  12  -7  -4  207.98   28.90
 -12   7   4  231.98   37.50
 -12   7   4  203.38   30.50
 -12   7   4  239.18   28.00
  11  -7  -4   44.30   22.10
  11  -7  -4  -10.70   28.50
  11  -7  -4   40.30   15.40
 -11   7   4   86.39   28.90
 -11   7   4   53.79   17.80
 -11   7   4   57.09   14.80
  10  -7  -4  127.39   18.70
  10  -7  -4   79.79   25.10
  10  -7  -4   84.79   31.90
 -10   7   4  161.58   28.50
 -10   7   4  139.19   21.10
  10   7  -4  132.29   19.60
 -10   7   4   79.69   18.60
   9  -7  -4  127.69   35.10
   9  -7  -4  132.69   29.40
   9  -7  -4  188.28   24.40
  -9   7   4  222.48   32.40
  -9   7   4  188.08   24.90
   9   7  -4  194.68   24.00
  -9   7   4  180.58   26.30
   8  -7  -4  -22.80   29.50
   8  -7  -4    3.80   12.70
   8  -7  -4    7.00   18.10
  -8   7   4   23.00   12.70
  -8   7   4   32.10   14.90
   8   7  -4   32.00   11.90
  -8   7   4   11.90   19.20
   7  -7  -4   48.10   26.70
   7  -7  -4   40.40   20.30
   7  -7  -4   80.79   13.70
   7   7  -4   77.79   13.80
  -7   7   4   64.79   14.60
  -7   7   4   67.09   17.00
  -7   7   4   50.99   20.70
   7   7  -4   48.20   15.50
   6  -7  -4    8.50   10.60
   6  -7  -4    6.10   17.60
   6  -7  -4  -17.00   26.70
   6   7  -4   17.80   12.80
  -6   7   4   -3.50   15.90
  -6   7   4   -1.30   13.80
   6   7  -4    4.80   11.00
  -6   7   4   14.40   11.30
   5  -7  -4   -2.60   17.90
   5  -7  -4  -26.30   21.00
   5   7  -4  -10.50   12.70
  -5   7   4    5.10   13.70
  -5   7   4   22.20   16.80
  -5   7   4   -1.50    9.90
   5   7  -4    3.60   11.20
   4  -7  -4   16.80   17.80
   4  -7  -4   15.80   24.70
  -4   7   4   10.30   13.20
   4   7  -4   -4.50   11.60
   4   7  -4   16.90   13.30
  -4   7   4    0.70   10.70
  -4   7   4   26.90   15.50
   3  -7  -4  -14.10   23.70
  -3  -7   4   20.40   13.90
   3  -7  -4   -6.50   16.80
  -3   7   4  -13.80   12.00
  -3   7   4   -2.20   10.50
   3   7  -4  -11.10   11.00
  -3   7   4    0.70   14.50
   3   7  -4    1.30   13.40
   3   7  -4   -3.10   10.30
   2  -7  -4    3.90   17.60
  -2  -7   4   33.00   15.00
   2  -7  -4   10.90   19.50
   2   7  -4   18.50   11.60
  -2   7   4   33.70   14.00
  -2   7   4   21.00   12.50
  -2   7   4   22.50   11.40
   2   7  -4   16.40   12.00
   2   7  -4   34.70   15.20
   1  -7  -4   11.20   17.30
   1  -7  -4   17.00   21.80
  -1  -7   4    0.40   14.20
  -1  -7   4  -61.59   18.00
  -1   7   4    9.60   13.10
  -1   7   4   27.90   13.00
   1   7  -4   27.90   15.60
   1   7  -4   11.80   10.80
   1   7  -4    5.30   11.50
  -1   7   4    5.10   10.90
   0  -7  -4   99.69   20.30
   0  -7   4   62.39   18.40
   0  -7  -4   71.19   22.60
   0   7  -4   75.89   16.00
   0   7   4   95.99   17.70
   0   7  -4  114.19   20.20
   0   7   4   87.39   15.70
   0   7  -4   74.99   15.40
   1  -7   4   20.80   15.30
  -1  -7  -4   40.80   18.80
  -1  -7  -4   42.90   16.70
   1   7   4   25.40   12.60
  -1   7  -4   41.20   13.30
   1   7   4   37.70   13.30
  -1   7  -4   50.49   17.60
  -1   7  -4   22.70   12.20
   2  -7   4  255.87   35.40
  -2  -7  -4  291.87   39.20
  -2  -7  -4  244.38   36.40
  -2   7  -4  248.28   33.20
  -2   7  -4  262.67   34.20
  -2   7  -4  368.36   40.80
   2   7   4  264.17   33.60
   2   7   4  254.07   33.80
  -3  -7  -4  107.79   21.90
   3  -7   4   81.49   20.30
  -3  -7  -4   99.69   20.50
  -3   7  -4  107.79   18.40
   3   7   4   97.49   17.40
   3   7   4  130.19   18.40
  -3   7  -4   81.79   18.00
  -3   7  -4  170.08   24.50
   4  -7   4   51.59   18.40
  -4  -7  -4  101.29   19.20
  -4   7  -4   53.39   14.10
  -4   7  -4  105.99   22.00
   4   7   4   70.49   15.90
   4   7   4   67.79   14.30
  -4   7  -4   73.89   16.80
   5  -7   4  145.69   28.40
  -5   7  -4  205.68   27.90
  -5   7  -4  198.08   26.10
   5   7   4  191.48   26.90
  -5   7  -4  299.27   34.10
   6  -7   4    8.50   16.10
   6   7   4   41.80   13.40
  -6   7  -4   13.10   11.50
  -6   7  -4   44.60   20.60
  -6   7  -4   49.70   15.00
   7  -7   4    6.30   17.10
  -7   7  -4   43.50   12.30
   7   7   4   32.60   12.80
  -7   7  -4   30.70   14.60
  -7   7  -4   46.80   20.60
   8  -7   4  125.69   27.60
  -8   7  -4  168.18   24.20
  -8   7  -4  193.48   26.00
  -8   7  -4  254.57   33.40
   9  -7   4    9.30   17.80
  -9   7  -4   75.69   24.40
  -9   7  -4   54.39   14.20
  -9   7  -4   80.69   18.60
  10  -7   4   42.90   20.50
 -10   7  -4   68.89   26.00
 -10   7  -4   76.09   17.40
 -10   7  -4   60.49   15.00
  11  -7   4  112.89   27.30
 -11   7  -4  132.89   24.60
 -11   7  -4  224.88   35.50
 -11   7  -4  182.58   24.80
  12  -7   4   71.39   23.60
 -12   7  -4   61.49   19.00
 -12   7  -4  120.29   20.00
 -12   7  -4  117.39   29.60
  13  -7   4  -36.30   19.40
 -13   7  -4    1.10   12.50
 -13   7  -4   21.10   28.20
 -13   7  -4   -3.30   15.00
  14  -7   4  -30.80   19.70
  14  -7   4   -3.20   14.90
 -14   7  -4   -7.70   12.70
 -14   7  -4    2.10   28.80
 -14   7  -4   18.90   16.10
  15  -7   4  -21.90   20.10
 -15   7  -4    2.60   13.50
 -15   7  -4   -2.90   24.80
  16  -7   4  -31.80   18.80
  16  -7   4    8.00   17.60
 -16   7  -4   -8.20   16.50
 -16   7  -4   -0.50   15.10
 -16   7  -4   28.20   35.40
  17  -7   4  -25.90   21.30
 -17   7  -4    6.80   35.70
 -17   7  -4   -3.90   17.80
  17  -8  -4  -11.20   22.90
 -17   8   4   46.10   22.60
 -17   8   4   51.49   42.20
  16  -8  -4  -11.70   24.50
  16  -8  -4 -103.89   36.10
 -16   8   4   79.29   43.00
 -16   8   4   49.70   18.90
 -16   8   4   32.40   21.70
  15  -8  -4   -0.60   27.60
 -15   8   4   22.80   34.80
 -15   8   4    3.50   20.40
  14  -8  -4   18.50   22.00
  14  -8  -4  -70.99   34.40
 -14   8   4   60.09   24.40
 -14   8   4   24.00   34.40
  13  -8  -4   54.89   36.10
  13  -8  -4   91.69   29.40
 -13   8   4  134.79   21.90
 -13   8   4  111.69   27.00
  12  -8  -4  -91.69   31.60
  12  -8  -4  -21.70   20.80
 -12   8   4   28.00   20.10
 -12   8   4   -9.30   17.70
 -12   8   4    8.30   29.60
  11  -8  -4   35.70   35.60
  11  -8  -4  106.19   28.30
 -11   8   4  139.39   32.80
 -11   8   4  137.59   24.40
 -11   8   4   97.49   21.50
  10  -8  -4   -4.60   32.30
  10  -8  -4   50.09   23.80
 -10   8   4   63.79   17.80
 -10   8   4   71.69   23.40
   9  -8  -4    6.90   31.50
   9  -8  -4    7.60   22.30
  -9   8   4   17.90   31.20
  -9   8   4   57.39   18.60
  -9   8   4   29.50   16.10
   8  -8  -4   58.39   34.30
   8  -8  -4   82.39   25.60
  -8   8   4  101.29   21.80
  -8   8   4   55.29   18.60
  -8   8   4  152.78   28.10
   7  -8  -4   35.60   22.30
   7  -8  -4    4.40   35.20
  -7   8   4   18.30   14.90
  -7   8   4   18.20   17.40
   7   8  -4    6.90   14.70
  -7   8   4   38.70   23.80
   6  -8  -4  -15.60   28.00
   6  -8  -4   13.70   22.30
  -6   8   4   54.29   15.10
  -6   8   4   64.89   24.80
  -6   8   4   53.09   19.70
   6   8  -4   52.69   16.30
   5  -8  -4   17.10   20.90
   5  -8  -4  -18.40   26.70
   5   8  -4   -4.20   13.30
  -5   8   4   13.40   16.50
  -5   8   4   31.10   19.30
  -5   8   4   -0.70   13.00
   4  -8  -4   -7.20   20.20
   4  -8  -4   -9.90   30.00
  -4   8   4   -8.00   13.30
   4   8  -4   -9.20   13.10
  -4   8   4    5.40   16.00
  -4   8   4  -20.50   17.30
   4   8  -4   14.90   16.40
   4   8  -4    8.50   14.30
   3  -8  -4   16.70   24.40
   3  -8  -4   27.20   22.20
  -3   8   4    5.10   16.00
   3   8  -4   14.70   17.60
   3   8  -4    6.30   14.10
   3   8  -4   20.90   14.00
   2  -8  -4   54.79   23.10
   2  -8  -4   44.60   27.10
   2   8  -4   34.70   14.90
   2   8  -4   39.80   15.90
  -2   8   4   62.99   19.00
   2   8  -4   41.00   21.00
  -2   8   4   31.30   14.70
   1  -8  -4   22.60   20.70
   1  -8  -4   15.20   25.30
   1   8  -4   10.50   15.80
  -1   8   4   11.40   13.10
   1   8  -4   29.00   15.20
   1   8  -4   35.90   21.00
  -1   8   4   33.00   16.80
   0  -8   4   -6.40   16.80
   0  -8  -4    2.80   22.70
   0  -8  -4   21.80   20.90
   0   8  -4   -3.00   20.30
   0   8  -4   -5.90   13.40
   0   8  -4   22.40   15.20
   0   8   4    5.80   16.20
  -1  -8  -4  147.19   25.10
  -1  -8  -4   94.59   26.30
   1  -8   4  102.29   22.90
   1   8   4  144.19   22.60
  -1   8  -4   80.39   21.40
   1   8   4  123.89   20.40
  -1   8  -4  117.19   25.70
  -1   8  -4  119.79   22.00
   2  -8   4   27.50   19.10
  -2   8  -4   45.00   16.70
   2   8   4   13.70   14.00
  -2   8  -4   87.39   25.00
  -2   8  -4   30.90   15.10
   2   8   4   36.10   16.60
   3  -8   4  286.97   49.30
   3   8   4  461.55   48.70
  -3   8  -4  438.76   48.80
  -3   8  -4  394.76   45.70
   4  -8   4   71.99   24.80
  -4   8  -4  118.99   23.10
   4   8   4  101.89   20.10
  -4   8  -4  144.69   23.10
   4   8   4  120.19   22.70
  -4   8  -4  214.18   30.20
   5  -8   4   14.10   20.20
   5   8   4   36.60   14.20
   5   8   4   37.90   16.10
  -5   8  -4   64.79   17.60
  -5   8  -4   68.99   29.60
  -5   8  -4   57.09   18.00
   6  -8   4   42.10   22.90
  -6   8  -4  111.99   19.80
  -6   8  -4  137.49   28.60
  -6   8  -4  149.49   26.40
   6   8   4  105.89   20.30
   7  -8   4   10.40   21.20
  -7   8  -4   51.19   16.10
  -7   8  -4   85.39   19.80
  -7   8  -4   98.49   27.60
   8  -8   4   -6.00   19.50
  -8   8  -4   20.40   14.90
  -8   8  -4   38.90   18.40
   9  -8   4   26.50   24.30
  -9   8  -4   99.99   19.30
  -9   8  -4   90.39   23.50
  -9   8  -4  132.59   32.10
  10  -8   4  -40.80   19.70
 -10   8  -4    6.80   15.10
 -10   8  -4    4.10   28.50
 -10   8  -4   15.40   17.30
  11  -8   4    1.70   21.80
 -11   8  -4   80.59   31.80
 -11   8  -4   47.10   17.30
 -11   8  -4   68.29   23.60
  12  -8   4   19.10   24.30
 -12   8  -4   91.99   19.90
 -12   8  -4  103.19   34.40
 -12   8  -4  105.39   21.10
  13  -8   4    0.60   21.10
 -13   8  -4   19.10   19.00
 -13   8  -4   14.10   21.20
 -13   8  -4   43.40   36.30
  14  -8   4  -70.39   19.50
 -14   8  -4  -16.70   18.50
 -14   8  -4    4.10   37.30
  15  -8   4  -41.20   20.80
  15  -8   4   33.40   20.30
 -15   8  -4   44.20   37.70
 -15   8  -4   28.20   19.10
  13  -9  -4   38.60   25.20
  13  -9  -4  -74.49   46.50
 -13   9   4   98.29   25.10
  12  -9  -4   71.19   29.50
  12  -9  -4  -54.69   36.20
 -12   9   4   71.29   20.30
 -12   9   4   77.69   24.20
  11  -9  -4  -23.30   35.60
  11  -9  -4   14.00   26.20
 -11   9   4   34.70   25.40
 -11   9   4   76.09   32.60
  10  -9  -4   16.70   24.00
  10  -9  -4  -28.50   35.00
  10   9  -4   37.80   17.80
   9  -9  -4   76.59   38.40
   9  -9  -4   92.99   28.50
  -9   9   4  134.49   43.30
  -9   9   4  129.59   25.90
   9   9  -4   88.19   21.40
   8  -9  -4   71.59   25.80
   8  -9  -4   63.59   37.90
  -8   9   4  106.69   37.40
  -8   9   4   80.09   22.20
   8   9  -4   45.40   19.30
  -8   9   4   67.09   25.80
   7  -9  -4  126.49   45.40
   7  -9  -4  118.29   31.50
  -7   9   4  153.18   31.00
   7   9  -4  118.89   22.80
  -7   9   4  120.79   25.70
   6  -9  -4    1.60   32.70
   6  -9  -4   37.10   25.10
  -6   9   4   17.00   18.00
   6   9  -4    6.10   16.90
   6   9  -4   32.50   17.40
  -6   9   4   39.80   20.80
   5  -9  -4   22.80   25.40
   5  -9  -4   16.00   37.70
  -5   9   4   32.90   16.90
   5   9  -4    3.20   15.30
  -5   9   4   16.10   22.80
   5   9  -4   17.30   16.90
   4  -9  -4  110.69   40.00
   4  -9  -4   74.09   26.30
   4   9  -4   82.59   21.10
  -4   9   4   74.79   19.90
  -4   9   4  117.49   23.20
   4   9  -4   20.60   19.50
   3  -9  -4   83.99   35.70
   3  -9  -4   42.20   24.60
   3   9  -4   -4.10   16.00
  -3   9   4   47.40   19.80
   3   9  -4   33.20   18.30
  -3   9   4   23.50   17.10
   2  -9  -4  130.79   29.60
   2   9  -4   91.59   22.60
  -2   9   4  147.69   27.10
  -2   9   4  116.49   22.20
   2   9  -4  109.49   23.30
   1  -9  -4  106.19   27.70
  -1   9   4  112.09   23.80
   1   9  -4   51.79   19.40
   1   9  -4   22.90   19.20
  -1   9   4   83.09   19.40
   0   9   4   77.79   19.70
   0   9  -4  109.79   30.40
   0   9   4   90.89   22.00
   0   9  -4   77.79   23.40
   0   9  -4   60.49   21.20
   1   9   4   36.60   17.60
  -1   9  -4   42.60   28.40
  -1   9  -4   22.70   19.10
   1   9   4   37.40   19.50
  -1   9  -4  -10.30   17.60
  -2   9  -4    2.10   28.50
   2   9   4   46.00   22.10
  -2   9  -4   28.00   21.70
  -2   9  -4    6.30   16.30
   3  -9   4   58.99   24.90
  -3   9  -4   78.29   20.40
  -3   9  -4  118.29   24.10
   3   9   4  103.89   22.90
  -3   9  -4  113.29   34.90
   4  -9   4    3.10   22.70
   4   9   4   34.60   20.10
  -4   9  -4   25.20   16.90
  -4   9  -4   26.40   25.70
  -4   9  -4   38.60   20.70
   5  -9   4  155.48   37.50
  -5   9  -4  361.36   45.40
  -5   9  -4  292.27   37.10
   5   9   4  253.17   35.60
  -5   9  -4  251.37   34.50
   6  -9   4    1.10   23.70
  -6   9  -4   49.70   28.50
  -6   9  -4   45.10   17.90
  -6   9  -4   49.60   21.30
   7  -9   4    7.50   23.90
  -7   9  -4   66.49   19.10
  -7   9  -4   69.49   21.50
  -7   9  -4   92.29   32.30
   8  -9   4   -7.10   23.30
  -8   9  -4   59.49   21.80
  -8   9  -4   70.29   26.90
   9  -9   4  -28.80   24.20
  -9   9  -4   27.40   25.50
  10  -9   4  -18.30   23.70
 -10   9  -4   92.59   28.10
 -10   9  -4   35.00   22.60
 -10   9  -4  118.99   38.00
  11  -9   4  -38.20   22.30
 -11   9  -4   39.20   20.60
 -11   9  -4   97.19   40.70
 -11   9  -4   26.80   18.20
 -12   9  -4   53.29   21.70
  -8  10   4    6.80   23.40
   8  10  -4   19.50   19.90
   7 -10  -4   91.19   32.20
   7 -10  -4  137.19   47.10
   7  10  -4   33.20   21.50
  -7  10   4   61.99   24.10
   7  10  -4   38.40   22.30
   6 -10  -4   86.29   30.30
  -6  10   4   47.40   24.50
   6  10  -4   19.00   21.00
   6  10  -4   47.00   20.10
   5 -10  -4   54.79   29.00
  -5  10   4   46.10   27.00
   5  10  -4   45.20   21.00
   5  10  -4  -23.90   20.00
   4 -10  -4   91.39   33.90
  -4  10   4   60.09   23.90
   4  10  -4   13.30   22.70
   4  10  -4   39.30   20.20
   3  10  -4   58.49   22.10
  -3  10   4   59.19   26.20
   3  10  -4    0.60   19.60
   2  10  -4  127.69   26.50
   2  10  -4  102.99   27.50
  -2  10   4  180.58   29.20
   1  10  -4   61.99   22.70
   1  10  -4   24.10   18.50
  -1  10   4   60.19   25.80
   0  10  -4    2.60   22.40
   0  10  -4   68.39   22.00
   0  10   4   38.70   21.90
  -1  10  -4   16.00   21.50
  -1  10  -4   41.80   27.70
   1  10   4   33.80   23.60
  -2  10  -4  -19.20   17.90
   2  10   4   26.20   23.60
  -2  10  -4    0.90   25.60
  -3  10  -4   14.70   18.90
  -3  10  -4   20.50   22.90
   3  10   4   29.50   20.70
   4  10   4   51.89   22.50
  -4  10  -4   -5.40   28.80
  -5  10  -4   71.19   32.60
  -6  10  -4   73.59   28.20
 -26   0   5    3.70   17.40
  26   0  -5  -11.10   19.50
  25   0  -5   93.09   22.90
 -25   0   5   95.39   20.50
 -24   0   5   10.10   15.80
  24   0  -5   18.20   17.20
  23   0  -5   11.30   16.00
 -23   0   5    8.60   14.60
  22   0  -5   -1.00   14.90
 -22   0   5    9.60   13.70
  21   0  -5   44.90   19.10
 -21   0   5   31.90   13.90
  21   0  -5   34.00   15.20
  20   0  -5  -14.00   13.40
  20   0  -5  -12.20   13.80
 -20   0   5  -21.40   11.70
 -19   0   5   17.50   11.90
  19   0  -5   31.30   14.50
  19   0  -5   57.79   17.00
 -19   0   5   32.20   10.20
 -18   0   5    2.60   10.30
 -18   0   5   -7.00    8.30
  18   0  -5   -6.70   12.70
  18   0  -5    1.20   11.80
 -17   0   5  -15.10    7.60
 -17   0   5   -4.90    9.50
  17   0  -5   -4.80   11.10
  17   0  -5   -9.40   11.20
 -16   0   5   -4.20    7.40
 -16   0   5   -3.40    8.60
  16   0  -5   -1.10   10.60
  16   0  -5   -4.30   10.20
 -15   0   5   29.70    8.10
  15   0  -5   34.30   11.20
  15   0  -5   37.50   11.30
 -15   0   5   21.90    9.30
 -14   0   5  -13.00    6.50
  14   0  -5  -13.90    8.80
  14   0  -5   -4.10    8.60
 -14   0   5   10.40    7.50
  13   0  -5  764.02   76.59
  13   0  -5  675.03   76.29
 -13   0   5  708.93   75.69
 -13   0   5  657.33   75.89
 -12   0   5   -0.80    6.70
  12   0  -5    2.00    8.00
 -12   0   5    2.10    6.40
  12   0  -5   28.20    8.00
  11   0  -5  388.66   38.80
 -11   0   5  343.47   37.80
  11   0  -5  318.47   38.20
 -11   0   5  312.37   37.90
 -10   0   5    5.00    6.10
  10   0  -5   -8.00    7.50
 -10   0   5    3.80    6.00
   9   0  -5   64.69    9.00
  -9   0   5   42.10    8.50
  -9   0   5   42.30    8.50
   9   0  -5   59.59    9.80
  -8   0   5   -1.10    5.30
   8   0  -5  -14.00    5.90
   8   0  -5    9.80    5.60
  -8   0   5   -2.30    5.30
  -7   0   5  481.95   51.79
  -7   0   5  487.15   51.89
   7   0  -5  437.06   52.59
   7   0  -5  509.95   52.09
   7   0  -5  485.75   51.99
   6   0  -5   -1.40    6.90
   6   0  -5   -4.00    5.10
  -6   0   5   -1.80    4.20
  -6   0   5   -5.00    4.60
   6   0  -5    3.50    5.50
  -5   0   5  582.54   62.39
   5   0  -5  583.24   62.49
   5   0  -5  551.64   62.99
  -5   0   5  596.04   62.29
   5   0  -5  596.04   62.69
  -4   0   5    2.40    4.10
   4   0  -5    2.10    4.70
   4   0  -5   -3.20    5.50
  -4   0   5    1.60    3.60
   4   0  -5   -1.20    4.80
  -3   0   5   21.80    4.70
   3   0  -5    8.80    4.90
   3   0  -5   20.30    5.80
  -3   0   5   19.30    4.00
   2   0  -5   -1.90    5.00
   2   0  -5   -2.60    4.00
   2   0  -5    0.60    4.80
  -2   0   5    3.00    3.80
   1   0  -5  206.58   24.10
   1   0  -5  220.08   23.40
  -1   0   5  222.08   23.40
   1   0  -5  204.18   23.80
   0   0   5    6.20    3.10
   0   0  -5    6.00    4.00
   0   0  -5    1.20    2.60
   0   0  -5    3.70    5.30
   0   0  -5   -0.50    4.50
  -1   0  -5   58.79    6.30
   1   0   5   64.69    6.70
  -1   0  -5   52.79    7.80
  -1   0  -5   51.29    8.70
  -1   0  -5   41.00    6.30
   1   0   5   51.69    6.90
  -2   0  -5    0.10    2.30
  -2   0  -5    5.00    6.00
  -2   0  -5    3.20    4.70
   2   0   5   -0.20    2.20
  -3   0  -5 1690.63  183.18
   3   0   5 1763.92  183.08
   3   0   5 1808.32  183.88
   3   0   5 1650.13  183.08
  -3   0  -5 1657.73  183.58
  -3   0  -5 1784.62  184.08
   4   0   5   -5.10    2.00
  -4   0  -5    8.60    6.40
   4   0   5   -3.00    4.60
  -4   0  -5    1.90    4.70
  -4   0  -5    1.10    2.70
   5   0   5  112.29   14.10
  -5   0  -5  103.99   13.90
  -5   0  -5  107.29   15.30
  -5   0  -5  109.29   12.40
  -6   0  -5    1.10    3.10
   6   0   5   -0.30    5.20
  -6   0  -5   -5.80    6.60
   6   0   5    1.60    2.10
  -6   0  -5   -8.30    5.20
  -7   0  -5  533.35   55.79
  -7   0  -5  509.85   53.99
   7   0   5  500.75   54.99
   7   0   5  499.85   53.79
  -7   0  -5  476.65   54.89
  -8   0  -5   -2.50    6.20
  -8   0  -5   -0.50    3.80
  -8   0  -5    7.90    7.80
   8   0   5   -3.10    6.10
   8   0   5   -3.80    2.40
   9   0   5  726.03   78.09
  -9   0  -5  711.83   77.89
   9   0   5  720.23   77.29
  -9   0  -5  716.93   76.99
 -10   0  -5   -0.70    4.60
 -10   0  -5    1.90    7.00
  10   0   5   -3.20    6.70
  10   0   5    1.70    6.70
  11   0   5    8.40    7.30
  11   0   5    2.20    7.20
 -11   0  -5   -0.80    7.60
 -11   0  -5    6.90    5.20
 -12   0  -5    1.50    5.50
 -12   0  -5   -7.20    8.40
  12   0   5   -7.70    7.40
  12   0   5   -5.40    7.80
 -13   0  -5   67.29   10.60
 -13   0  -5   64.89   13.70
  13   0   5   80.39   13.50
  13   0   5   70.49   12.20
  14   0   5    0.90    9.40
 -14   0  -5   -0.60   10.40
 -14   0  -5   10.00    7.00
  14   0   5   -9.50    9.10
 -15   0  -5    3.30   11.60
  15   0   5    0.90    9.50
  15   0   5   16.60   11.00
 -15   0  -5    0.70    7.70
  16   0   5    9.70   11.70
  16   0   5   11.30   10.30
 -16   0  -5   -5.50    8.20
 -16   0  -5    7.20   13.70
 -17   0  -5    7.20   15.10
  17   0   5   38.90   12.20
 -17   0  -5   28.70    9.70
  17   0   5   18.40   12.70
  18   0   5  -25.30   11.10
 -18   0  -5    0.50    9.60
  18   0   5   12.30   14.00
 -18   0  -5   11.50   15.70
 -19   0  -5   15.80   17.50
  19   0   5    1.00   14.00
  19   0   5   18.00   12.30
 -19   0  -5    6.60   10.40
  20   0   5    7.00   14.30
  20   0   5   -9.50   15.70
 -20   0  -5   -3.20   10.50
  21   0   5  223.18   31.00
  21   0   5  190.28   27.60
 -21   0  -5  177.68   25.10
  22   0   5   13.50   20.00
 -22   0  -5   -3.70   12.30
  22   0   5   -4.20   14.40
 -23   0  -5   96.99   18.10
  23   0   5   91.69   20.00
  24   0   5  -29.30   17.80
 -24   0  -5    1.80   14.30
  26  -1  -5   38.70   19.10
[truncated: 1,175,910 more chars]
