# Supplementary material
Source: MDPI journal article supplement (https://www.mdpi.com/2304-6740/7/5/65)
Supplement: s1 [file s1 › inorganics-510360-supplementary/cif and checkcif files/jm1901.cif]

data_jm1901
_audit_creation_date               2019-02-27
_audit_creation_method
;
Olex2 1.2
(compiled 2018.05.29 svn.r3508 for OlexSys, GUI svn.r5506)
;
_shelx_SHELXL_version_number       '2016/6'
_audit_contact_author_address      ?
_audit_contact_author_email        ?
_audit_contact_author_name         ''
_audit_contact_author_phone        ?
_publ_contact_author_id_orcid      ?
_publ_section_references
;
Dolomanov, O.V., Bourhis, L.J., Gildea, R.J, Howard, J.A.K. & Puschmann, H.
 (2009), J. Appl. Cryst. 42, 339-341.

Sheldrick, G.M. (2008). Acta Cryst. A64, 112-122.
;
_chemical_name_common              ?
_chemical_name_systematic          ?
_chemical_formula_moiety           'C40 H50 Br2 Mg N6, 2(C5 H5 N)'
_chemical_formula_sum              'C50 H60 Br2 Mg N8'
_chemical_formula_weight           957.19
_chemical_melting_point            ?
loop_
  _atom_type_symbol
  _atom_type_description
  _atom_type_scat_dispersion_real
  _atom_type_scat_dispersion_imag
  _atom_type_scat_source
 'C' 'C' 0.0033 0.0016 'International Tables Vol C Tables 4.2.6.8 and 6.1.1.4'
 'H' 'H' 0.0000 0.0000 'International Tables Vol C Tables 4.2.6.8 and 6.1.1.4'
 'Br' 'Br' -0.2901 2.4595
 'International Tables Vol C Tables 4.2.6.8 and 6.1.1.4'
 'Mg' 'Mg' 0.0486 0.0363 'International Tables Vol C Tables 4.2.6.8 and 6.1.1.4'
 'N' 'N' 0.0061 0.0033 'International Tables Vol C Tables 4.2.6.8 and 6.1.1.4'

_shelx_space_group_comment
;
The symmetry employed for this shelxl refinement is uniquely defined
by the following loop, which should always be used as a source of
symmetry information in preference to the above space-group names.
They are only intended as comments.
;
_space_group_crystal_system        'monoclinic'
_space_group_IT_number             14
_space_group_name_H-M_alt          'P 1 21/n 1'
_space_group_name_Hall             '-P 2yn'
loop_
  _space_group_symop_operation_xyz
 'x, y, z'
 '-x+1/2, y+1/2, -z+1/2'
 '-x, -y, -z'
 'x-1/2, -y-1/2, z-1/2'

_cell_length_a                     19.0860(8)
_cell_length_b                     12.8472(6)
_cell_length_c                     20.6882(8)
_cell_angle_alpha                  90
_cell_angle_beta                   111.6430(10)
_cell_angle_gamma                  90
_cell_volume                       4715.1(3)
_cell_formula_units_Z              4
_cell_measurement_reflns_used      9354
_cell_measurement_temperature      100(2)
_cell_measurement_theta_max        29.18
_cell_measurement_theta_min        2.42
_shelx_estimated_absorpt_T_max     0.871
_shelx_estimated_absorpt_T_min     0.777
_exptl_absorpt_coefficient_mu      1.776
_exptl_absorpt_correction_T_max    0.7459
_exptl_absorpt_correction_T_min    0.6990
_exptl_absorpt_correction_type     'multi-scan'
_exptl_absorpt_process_details
;
SADABS-2016/2 (Bruker,2016/2) was used for absorption correction.
wR2(int) was 0.0626 before and 0.0561 after correction.
The Ratio of minimum to maximum transmission is 0.9371.
The \l/2 correction factor is Not present.
;
_exptl_absorpt_special_details     ?
_exptl_crystal_colour              colorless
_exptl_crystal_density_diffrn      1.348
_exptl_crystal_density_meas        ?
_exptl_crystal_density_method      ?
_exptl_crystal_description         prism
_exptl_crystal_F_000               1992
_exptl_crystal_size_max            0.15
_exptl_crystal_size_mid            0.13
_exptl_crystal_size_min            0.08
_exptl_transmission_factor_max     ?
_exptl_transmission_factor_min     ?
_diffrn_reflns_av_R_equivalents    0.0639
_diffrn_reflns_av_unetI/netI       0.0290
_diffrn_reflns_Laue_measured_fraction_full  0.999
_diffrn_reflns_Laue_measured_fraction_max  0.998
_diffrn_reflns_limit_h_max         26
_diffrn_reflns_limit_h_min         -26
_diffrn_reflns_limit_k_max         17
_diffrn_reflns_limit_k_min         -17
_diffrn_reflns_limit_l_max         24
_diffrn_reflns_limit_l_min         -28
_diffrn_reflns_number              186565
_diffrn_reflns_point_group_measured_fraction_full  0.999
_diffrn_reflns_point_group_measured_fraction_max  0.998
_diffrn_reflns_theta_full          25.242
_diffrn_reflns_theta_max           29.604
_diffrn_reflns_theta_min           1.826
_diffrn_ambient_temperature        100(2)
_diffrn_measured_fraction_theta_full  0.999
_diffrn_measured_fraction_theta_max  0.998
_diffrn_radiation_source          'ImuS high brilliance micro-focus tube' 
_diffrn_radiation_monochromator   'Quazar focussing montel optics'
_diffrn_measurement_device_type   'Bruker Kappa ImuS Duo Photon II CPAD'
_diffrn_measurement_method        '\f and \w scans'
_diffrn_detector_area_resol_mean   ? 
_diffrn_radiation_type             MoK\a
_diffrn_radiation_wavelength       0.71073
_diffrn_standards_number           0
_reflns_Friedel_coverage           0.000
_reflns_Friedel_fraction_full      .
_reflns_Friedel_fraction_max       .
_reflns_number_gt                  10646
_reflns_number_total               13232
_reflns_special_details
;
 Reflections were merged by SHELXL according to the crystal
 class for the calculation of statistics and refinement.
 
 _reflns_Friedel_fraction is defined as the number of unique
 Friedel pairs measured divided by the number that would be
 possible theoretically, ignoring centric projections and
 systematic absences.
;
_reflns_threshold_expression       'I > 2\s(I)'
_computing_data_collection        'Bruker APEX3 (Bruker AXS, 2015)'
_computing_cell_refinement        'SAINT V8.38A (Bruker AXS, 2016)'
_computing_data_reduction         'SAINT V8.38A (Bruker AXS, 2016)' 
_computing_structure_solution     'SHELXTL 6.12 (Bruker AXS, 2002)'
_computing_structure_refinement   'SHELXL-2016/6 (Sheldrick, 2015)'
_computing_molecular_graphics     'SHELXTL 6.12 (Bruker AXS, 2002)'
_computing_publication_material    'Olex2 (Dolomanov et al., 2009)'
_refine_diff_density_max           0.537
_refine_diff_density_min           -0.400
_refine_diff_density_rms           0.061
_refine_ls_extinction_coef         .
_refine_ls_extinction_method       none
_refine_ls_goodness_of_fit_ref     1.038
_refine_ls_hydrogen_treatment      constr
_refine_ls_matrix_type             full
_refine_ls_number_parameters       558
_refine_ls_number_reflns           13232
_refine_ls_number_restraints       0
_refine_ls_R_factor_all            0.0474
_refine_ls_R_factor_gt             0.0307
_refine_ls_restrained_S_all        1.038
_refine_ls_shift/su_max            0.002
_refine_ls_shift/su_mean           0.000
_refine_ls_structure_factor_coef   Fsqd
_refine_ls_weighting_details      
 'w=1/[\s^2^(Fo^2^)+(0.0228P)^2^+3.3282P] where P=(Fo^2^+2Fc^2^)/3'
_refine_ls_weighting_scheme        calc
_refine_ls_wR_factor_gt            0.0623
_refine_ls_wR_factor_ref           0.0680
_refine_special_details            ?
_olex2_refinement_description
;
1. Fixed Uiso
 At 1.2 times of:
  All C(H) groups, All C(H,H) groups
 At 1.5 times of:
  All C(H,H,H) groups
2.a Ternary CH refined with riding coordinates:
 C18(H18), C21(H21), C30(H30), C33(H33)
2.b Secondary CH2 refined with riding coordinates:
 C2(H2A,H2B), C3(H3A,H3B), C9(H9A,H9B), C10(H10A,H10B)
2.c Aromatic/amide H refined with riding coordinates:
 C5(H5), C6(H6), C7(H7), C14(H14), C15(H15), C16(H16), C26(H26), C27(H27),
 C28(H28), C36(H36), C37(H37), C38(H38), C39(H39), C40(H40), C101(H101),
 C102(H102), C103(H103), C104(H104), C105(H105), C201(H201), C202(H202),
 C203(H203), C204(H204), C205(H205)
2.d Idealised Me refined as rotating group:
 C19(H19A,H19B,H19C), C20(H20A,H20B,H20C), C22(H22A,H22B,H22C), C23(H23A,H23B,
 H23C), C31(H31A,H31B,H31C), C32(H32A,H32B,H32C), C34(H34A,H34B,H34C), C35(H35A,
 H35B,H35C)
;
_atom_sites_solution_hydrogens     geom
_atom_sites_solution_primary       ?
_atom_sites_solution_secondary     ?
loop_
  _atom_site_label
  _atom_site_type_symbol
  _atom_site_fract_x
  _atom_site_fract_y
  _atom_site_fract_z
  _atom_site_U_iso_or_equiv
  _atom_site_adp_type
  _atom_site_occupancy
  _atom_site_site_symmetry_order
  _atom_site_calc_flag
  _atom_site_refinement_flags_posn
  _atom_site_refinement_flags_adp
  _atom_site_refinement_flags_occupancy
  _atom_site_disorder_assembly
  _atom_site_disorder_group
 Mg1 Mg 0.77758(3) 0.54832(4) 0.51198(3) 0.01426(10) Uani 1 1 d . . . . .
 Br1 Br 0.89289(2) 0.59286(2) 0.62782(2) 0.01925(4) Uani 1 1 d . . . . .
 Br2 Br 0.66789(2) 0.50186(2) 0.38836(2) 0.02185(4) Uani 1 1 d . . . . .
 N1 N 0.73899(7) 0.80677(10) 0.46239(6) 0.0133(2) Uani 1 1 d . . . . .
 N2 N 0.82349(7) 0.72468(10) 0.43629(7) 0.0144(2) Uani 1 1 d . . . . .
 N3 N 0.85302(7) 0.55176(10) 0.45560(7) 0.0148(2) Uani 1 1 d . . . . .
 N4 N 0.87129(7) 0.37777(10) 0.48003(7) 0.0159(3) Uani 1 1 d . . . . .
 N5 N 0.82880(7) 0.28957(10) 0.54624(7) 0.0152(3) Uani 1 1 d . . . . .
 N6 N 0.69884(7) 0.54378(10) 0.56546(7) 0.0158(3) Uani 1 1 d . . . . .
 C1 C 0.77287(8) 0.71504(12) 0.46864(8) 0.0137(3) Uani 1 1 d . . . . .
 C2 C 0.76951(10) 0.88845(12) 0.42920(9) 0.0214(3) Uani 1 1 d . . . . .
 H2A H 0.797627 0.941981 0.463339 0.026 Uiso 1 1 calc R . . . .
 H2B H 0.728789 0.922511 0.390386 0.026 Uiso 1 1 calc R . . . .
 C3 C 0.82197(9) 0.82635(12) 0.40286(8) 0.0178(3) Uani 1 1 d . . . . .
 H3A H 0.801191 0.820453 0.351526 0.021 Uiso 1 1 calc R . . . .
 H3B H 0.872816 0.857925 0.418105 0.021 Uiso 1 1 calc R . . . .
 C4 C 0.86476(8) 0.64005(12) 0.42719(8) 0.0147(3) Uani 1 1 d . . . . .
 C5 C 0.91353(9) 0.64643(13) 0.39131(8) 0.0182(3) Uani 1 1 d . . . . .
 H5 H 0.921656 0.710296 0.372004 0.022 Uiso 1 1 calc R . . . .
 C6 C 0.94981(9) 0.55572(13) 0.38486(9) 0.0203(3) Uani 1 1 d . . . . .
 H6 H 0.983449 0.557243 0.360590 0.024 Uiso 1 1 calc R . . . .
 C7 C 0.93773(9) 0.46280(13) 0.41328(8) 0.0183(3) Uani 1 1 d . . . . .
 H7 H 0.962241 0.400325 0.408901 0.022 Uiso 1 1 calc R . . . .
 C8 C 0.88812(8) 0.46510(12) 0.44852(8) 0.0153(3) Uani 1 1 d . . . . .
 C9 C 0.90496(9) 0.27485(12) 0.47981(9) 0.0183(3) Uani 1 1 d . . . . .
 H9A H 0.960553 0.277074 0.502640 0.022 Uiso 1 1 calc R . . . .
 H9B H 0.891169 0.247641 0.431940 0.022 Uiso 1 1 calc R . . . .
 C10 C 0.86963(11) 0.21006(13) 0.52169(10) 0.0255(4) Uani 1 1 d . . . . .
 H10A H 0.834569 0.157248 0.492132 0.031 Uiso 1 1 calc R . . . .
 H10B H 0.908690 0.174815 0.561226 0.031 Uiso 1 1 calc R . . . .
 C11 C 0.82723(8) 0.38358(12) 0.51931(8) 0.0144(3) Uani 1 1 d . . . . .
 C12 C 0.68357(8) 0.83398(11) 0.49151(8) 0.0140(3) Uani 1 1 d . . . . .
 C13 C 0.60716(9) 0.83476(12) 0.44786(8) 0.0159(3) Uani 1 1 d . . . . .
 C14 C 0.55525(9) 0.86775(12) 0.47643(9) 0.0192(3) Uani 1 1 d . . . . .
 H14 H 0.503240 0.869884 0.447876 0.023 Uiso 1 1 calc R . . . .
 C15 C 0.57774(9) 0.89755(13) 0.54559(9) 0.0209(3) Uani 1 1 d . . . . .
 H15 H 0.541356 0.919475 0.564036 0.025 Uiso 1 1 calc R . . . .
 C16 C 0.65328(9) 0.89519(13) 0.58755(8) 0.0189(3) Uani 1 1 d . . . . .
 H16 H 0.668331 0.915660 0.634864 0.023 Uiso 1 1 calc R . . . .
 C17 C 0.70787(8) 0.86337(12) 0.56180(8) 0.0148(3) Uani 1 1 d . . . . .
 C18 C 0.57928(9) 0.80251(13) 0.37172(8) 0.0199(3) Uani 1 1 d . . . . .
 H18 H 0.621927 0.768734 0.362589 0.024 Uiso 1 1 calc R . . . .
 C19 C 0.55392(13) 0.89828(15) 0.32452(10) 0.0365(5) Uani 1 1 d . . . . .
 H19A H 0.512089 0.932409 0.332818 0.055 Uiso 1 1 calc GR . . . .
 H19B H 0.537351 0.876569 0.275748 0.055 Uiso 1 1 calc GR . . . .
 H19C H 0.596133 0.947060 0.334823 0.055 Uiso 1 1 calc GR . . . .
 C20 C 0.51408(10) 0.72399(14) 0.35424(9) 0.0249(4) Uani 1 1 d . . . . .
 H20A H 0.531282 0.661530 0.382932 0.037 Uiso 1 1 calc GR . . . .
 H20B H 0.497354 0.704947 0.304976 0.037 Uiso 1 1 calc GR . . . .
 H20C H 0.472046 0.755466 0.363660 0.037 Uiso 1 1 calc GR . . . .
 C21 C 0.79027(8) 0.86331(12) 0.60968(8) 0.0164(3) Uani 1 1 d . . . . .
 H21 H 0.819605 0.825678 0.585637 0.020 Uiso 1 1 calc R . . . .
 C22 C 0.82068(10) 0.97470(13) 0.62452(10) 0.0246(4) Uani 1 1 d . . . . .
 H22A H 0.815881 1.008834 0.580721 0.037 Uiso 1 1 calc GR . . . .
 H22B H 0.873878 0.972902 0.655341 0.037 Uiso 1 1 calc GR . . . .
 H22C H 0.791742 1.013615 0.646982 0.037 Uiso 1 1 calc GR . . . .
 C23 C 0.80124(10) 0.80609(14) 0.67737(8) 0.0231(3) Uani 1 1 d . . . . .
 H23A H 0.774247 0.843049 0.702557 0.035 Uiso 1 1 calc GR . . . .
 H23B H 0.855081 0.803343 0.706165 0.035 Uiso 1 1 calc GR . . . .
 H23C H 0.781449 0.735133 0.666868 0.035 Uiso 1 1 calc GR . . . .
 C24 C 0.79062(9) 0.26011(12) 0.59200(8) 0.0155(3) Uani 1 1 d . . . . .
 C25 C 0.71521(9) 0.22862(12) 0.56308(8) 0.0171(3) Uani 1 1 d . . . . .
 C26 C 0.68127(9) 0.19493(13) 0.60873(9) 0.0213(3) Uani 1 1 d . . . . .
 H26 H 0.630213 0.172669 0.590530 0.026 Uiso 1 1 calc R . . . .
 C27 C 0.72030(10) 0.19326(13) 0.67972(9) 0.0232(3) Uani 1 1 d . . . . .
 H27 H 0.696185 0.169577 0.709793 0.028 Uiso 1 1 calc R . . . .
 C28 C 0.79431(10) 0.22598(13) 0.70700(9) 0.0222(3) Uani 1 1 d . . . . .
 H28 H 0.820519 0.225171 0.755955 0.027 Uiso 1 1 calc R . . . .
 C29 C 0.83145(9) 0.26024(12) 0.66416(8) 0.0180(3) Uani 1 1 d . . . . .
 C30 C 0.67054(9) 0.22817(13) 0.48537(8) 0.0193(3) Uani 1 1 d . . . . .
 H30 H 0.701510 0.263134 0.461853 0.023 Uiso 1 1 calc R . . . .
 C31 C 0.65480(11) 0.11656(14) 0.45804(10) 0.0299(4) Uani 1 1 d . . . . .
 H31A H 0.702653 0.080125 0.467360 0.045 Uiso 1 1 calc GR . . . .
 H31B H 0.626044 0.117806 0.407818 0.045 Uiso 1 1 calc GR . . . .
 H31C H 0.625640 0.080258 0.481436 0.045 Uiso 1 1 calc GR . . . .
 C32 C 0.59661(10) 0.28827(14) 0.46727(10) 0.0268(4) Uani 1 1 d . . . . .
 H32A H 0.564226 0.253049 0.487783 0.040 Uiso 1 1 calc GR . . . .
 H32B H 0.570924 0.291127 0.416635 0.040 Uiso 1 1 calc GR . . . .
 H32C H 0.607307 0.359163 0.485807 0.040 Uiso 1 1 calc GR . . . .
 C33 C 0.91356(10) 0.29329(14) 0.69599(9) 0.0234(3) Uani 1 1 d . . . . .
 H33 H 0.926464 0.330171 0.659284 0.028 Uiso 1 1 calc R . . . .
 C34 C 0.96520(11) 0.19840(18) 0.71933(13) 0.0428(5) Uani 1 1 d . . . . .
 H34A H 0.954866 0.162194 0.756556 0.064 Uiso 1 1 calc GR . . . .
 H34B H 1.017928 0.221099 0.736524 0.064 Uiso 1 1 calc GR . . . .
 H34C H 0.955881 0.151112 0.679858 0.064 Uiso 1 1 calc GR . . . .
 C35 C 0.92932(11) 0.36779(15) 0.75746(10) 0.0319(4) Uani 1 1 d . . . . .
 H35A H 0.897090 0.429391 0.742426 0.048 Uiso 1 1 calc GR . . . .
 H35B H 0.982363 0.389048 0.774478 0.048 Uiso 1 1 calc GR . . . .
 H35C H 0.918616 0.332644 0.794845 0.048 Uiso 1 1 calc GR . . . .
 C36 C 0.71575(11) 0.50014(14) 0.62801(9) 0.0260(4) Uani 1 1 d . . . . .
 H36 H 0.765165 0.473585 0.651217 0.031 Uiso 1 1 calc R . . . .
 C37 C 0.66398(14) 0.49207(17) 0.66039(11) 0.0401(5) Uani 1 1 d . . . . .
 H37 H 0.677696 0.459896 0.704697 0.048 Uiso 1 1 calc R . . . .
 C38 C 0.59244(13) 0.53131(17) 0.62748(13) 0.0430(6) Uani 1 1 d . . . . .
 H38 H 0.555839 0.526241 0.648398 0.052 Uiso 1 1 calc R . . . .
 C39 C 0.57518(11) 0.57795(17) 0.56371(12) 0.0367(5) Uani 1 1 d . . . . .
 H39 H 0.526621 0.607015 0.540197 0.044 Uiso 1 1 calc R . . . .
 C40 C 0.62922(9) 0.58203(14) 0.53429(10) 0.0249(4) Uani 1 1 d . . . . .
 H40 H 0.616459 0.613433 0.489836 0.030 Uiso 1 1 calc R . . . .
 N100 N 0.83247(14) 0.64357(19) 0.20563(11) 0.0606(6) Uani 1 1 d . . . . .
 C101 C 0.79245(17) 0.5925(2) 0.23549(13) 0.0608(8) Uani 1 1 d . . . . .
 H101 H 0.806190 0.522606 0.249322 0.073 Uiso 1 1 calc R . . . .
 C102 C 0.73279(15) 0.6336(3) 0.24775(12) 0.0628(9) Uani 1 1 d . . . . .
 H102 H 0.706865 0.593493 0.270464 0.075 Uiso 1 1 calc R . . . .
 C103 C 0.71015(14) 0.7355(3) 0.22650(13) 0.0618(8) Uani 1 1 d . . . . .
 H103 H 0.668237 0.765797 0.233724 0.074 Uiso 1 1 calc R . . . .
 C104 C 0.75090(13) 0.7911(2) 0.19442(10) 0.0438(6) Uani 1 1 d . . . . .
 H104 H 0.737869 0.860663 0.179097 0.053 Uiso 1 1 calc R . . . .
 C105 C 0.81039(14) 0.7419(2) 0.18580(11) 0.0453(6) Uani 1 1 d . . . . .
 H105 H 0.838345 0.780102 0.164132 0.054 Uiso 1 1 calc R . . . .
 N200 N 0.53224(10) 0.49246(13) 0.10172(8) 0.0322(4) Uani 1 1 d . . . . .
 C201 C 0.55819(10) 0.50073(14) 0.17096(9) 0.0258(4) Uani 1 1 d . . . . .
 H201 H 0.588308 0.445624 0.197656 0.031 Uiso 1 1 calc R . . . .
 C202 C 0.54396(10) 0.58422(15) 0.20598(9) 0.0253(4) Uani 1 1 d . . . . .
 H202 H 0.563005 0.585782 0.255369 0.030 Uiso 1 1 calc R . . . .
 C203 C 0.50120(9) 0.66598(14) 0.16758(9) 0.0232(3) Uani 1 1 d . . . . .
 H203 H 0.490770 0.725077 0.190144 0.028 Uiso 1 1 calc R . . . .
 C204 C 0.47407(9) 0.65983(14) 0.09591(9) 0.0214(3) Uani 1 1 d . . . . .
 H204 H 0.444715 0.714610 0.068095 0.026 Uiso 1 1 calc R . . . .
 C205 C 0.49059(11) 0.57236(15) 0.06569(10) 0.0298(4) Uani 1 1 d . . . . .
 H205 H 0.471345 0.568311 0.016365 0.036 Uiso 1 1 calc R . . . .

loop_
  _atom_site_aniso_label
  _atom_site_aniso_U_11
  _atom_site_aniso_U_22
  _atom_site_aniso_U_33
  _atom_site_aniso_U_23
  _atom_site_aniso_U_13
  _atom_site_aniso_U_12
 Mg1 0.0145(2) 0.0126(2) 0.0182(3) 0.0012(2) 0.0090(2) 0.00192(19)
 Br1 0.01489(7) 0.01809(8) 0.02285(8) -0.00246(6) 0.00470(6) 0.00072(6)
 Br2 0.02193(8) 0.02377(8) 0.01743(7) 0.00004(6) 0.00443(6) 0.00057(7)
 N1 0.0150(6) 0.0109(6) 0.0149(6) 0.0011(5) 0.0065(5) 0.0004(5)
 N2 0.0155(6) 0.0130(6) 0.0163(6) 0.0022(5) 0.0079(5) 0.0012(5)
 N3 0.0139(6) 0.0141(6) 0.0179(6) 0.0001(5) 0.0074(5) 0.0010(5)
 N4 0.0166(6) 0.0137(6) 0.0209(7) 0.0008(5) 0.0111(5) 0.0040(5)
 N5 0.0157(6) 0.0129(6) 0.0195(6) -0.0007(5) 0.0093(5) 0.0021(5)
 N6 0.0153(6) 0.0137(6) 0.0201(6) -0.0001(5) 0.0083(5) 0.0013(5)
 C1 0.0127(7) 0.0145(7) 0.0130(7) -0.0007(5) 0.0037(5) 0.0001(5)
 C2 0.0280(9) 0.0142(8) 0.0282(9) 0.0052(6) 0.0178(7) 0.0014(6)
 C3 0.0220(8) 0.0140(7) 0.0202(8) 0.0025(6) 0.0112(6) -0.0009(6)
 C4 0.0139(7) 0.0152(7) 0.0149(7) 0.0000(6) 0.0052(6) 0.0005(6)
 C5 0.0177(8) 0.0196(8) 0.0203(8) 0.0015(6) 0.0104(6) -0.0010(6)
 C6 0.0177(8) 0.0258(8) 0.0217(8) 0.0005(7) 0.0122(6) 0.0000(6)
 C7 0.0167(7) 0.0202(8) 0.0205(8) -0.0007(6) 0.0100(6) 0.0034(6)
 C8 0.0135(7) 0.0158(7) 0.0174(7) -0.0002(6) 0.0068(6) 0.0005(6)
 C9 0.0195(8) 0.0151(7) 0.0228(8) -0.0007(6) 0.0107(6) 0.0046(6)
 C10 0.0344(10) 0.0149(8) 0.0373(10) 0.0021(7) 0.0249(8) 0.0063(7)
 C11 0.0127(7) 0.0155(7) 0.0152(7) -0.0018(6) 0.0052(6) -0.0002(5)
 C12 0.0151(7) 0.0100(7) 0.0179(7) 0.0015(5) 0.0072(6) 0.0014(5)
 C13 0.0165(7) 0.0116(7) 0.0179(7) -0.0001(6) 0.0043(6) 0.0000(6)
 C14 0.0129(7) 0.0177(8) 0.0254(8) -0.0010(6) 0.0051(6) 0.0010(6)
 C15 0.0168(7) 0.0216(8) 0.0264(8) -0.0036(7) 0.0106(7) 0.0011(6)
 C16 0.0200(8) 0.0204(8) 0.0175(7) -0.0030(6) 0.0083(6) 0.0011(6)
 C17 0.0145(7) 0.0126(7) 0.0166(7) 0.0008(6) 0.0051(6) 0.0007(6)
 C18 0.0184(8) 0.0212(8) 0.0170(7) -0.0011(6) 0.0029(6) -0.0005(6)
 C19 0.0485(12) 0.0274(10) 0.0223(9) 0.0024(8) -0.0002(8) -0.0065(9)
 C20 0.0223(8) 0.0248(9) 0.0236(8) -0.0047(7) 0.0037(7) -0.0034(7)
 C21 0.0147(7) 0.0179(7) 0.0152(7) -0.0016(6) 0.0039(6) 0.0013(6)
 C22 0.0188(8) 0.0195(8) 0.0323(9) -0.0026(7) 0.0055(7) -0.0017(6)
 C23 0.0247(9) 0.0250(9) 0.0183(8) 0.0019(7) 0.0065(7) 0.0055(7)
 C24 0.0177(7) 0.0106(7) 0.0210(7) -0.0005(6) 0.0102(6) 0.0004(6)
 C25 0.0164(7) 0.0130(7) 0.0232(8) -0.0013(6) 0.0088(6) 0.0022(6)
 C26 0.0169(8) 0.0206(8) 0.0292(9) -0.0033(7) 0.0117(7) -0.0018(6)
 C27 0.0272(9) 0.0228(8) 0.0268(9) -0.0018(7) 0.0183(7) -0.0033(7)
 C28 0.0279(9) 0.0199(8) 0.0216(8) -0.0027(6) 0.0122(7) -0.0022(7)
 C29 0.0204(8) 0.0131(7) 0.0214(8) -0.0021(6) 0.0088(6) -0.0018(6)
 C30 0.0172(8) 0.0179(8) 0.0223(8) 0.0002(6) 0.0065(6) 0.0018(6)
 C31 0.0373(11) 0.0209(9) 0.0259(9) -0.0027(7) 0.0051(8) 0.0025(8)
 C32 0.0175(8) 0.0227(9) 0.0380(10) 0.0053(8) 0.0079(7) 0.0021(7)
 C33 0.0225(8) 0.0257(9) 0.0209(8) -0.0018(7) 0.0067(7) -0.0082(7)
 C34 0.0221(10) 0.0430(13) 0.0561(14) -0.0173(11) 0.0058(9) 0.0000(9)
 C35 0.0342(10) 0.0259(9) 0.0274(9) -0.0052(8) 0.0017(8) -0.0048(8)
 C36 0.0308(9) 0.0264(9) 0.0249(8) 0.0058(7) 0.0151(7) 0.0070(8)
 C37 0.0601(14) 0.0365(11) 0.0393(11) 0.0081(9) 0.0366(11) 0.0034(10)
 C38 0.0483(13) 0.0384(12) 0.0648(15) -0.0098(11) 0.0473(12) -0.0069(10)
 C39 0.0216(9) 0.0384(11) 0.0559(13) -0.0083(10) 0.0210(9) 0.0037(8)
 C40 0.0194(8) 0.0247(9) 0.0314(9) 0.0010(7) 0.0104(7) 0.0054(7)
 N100 0.0744(16) 0.0661(15) 0.0374(11) 0.0166(11) 0.0163(11) 0.0032(13)
 C101 0.0639(18) 0.0648(18) 0.0369(13) 0.0119(12) -0.0011(12) -0.0196(15)
 C102 0.0510(16) 0.090(2) 0.0311(12) 0.0154(13) -0.0037(11) -0.0421(15)
 C103 0.0330(13) 0.102(2) 0.0428(14) -0.0034(15) 0.0054(11) -0.0248(14)
 C104 0.0381(12) 0.0602(15) 0.0245(10) 0.0005(10) 0.0017(9) -0.0150(11)
 C105 0.0537(14) 0.0556(15) 0.0244(10) 0.0095(10) 0.0117(10) -0.0082(12)
 N200 0.0360(9) 0.0290(8) 0.0278(8) -0.0035(7) 0.0074(7) 0.0080(7)
 C201 0.0226(8) 0.0241(9) 0.0277(9) 0.0030(7) 0.0056(7) 0.0031(7)
 C202 0.0212(8) 0.0326(10) 0.0197(8) -0.0003(7) 0.0046(7) 0.0018(7)
 C203 0.0204(8) 0.0258(9) 0.0239(8) -0.0034(7) 0.0088(7) 0.0014(7)
 C204 0.0169(8) 0.0251(9) 0.0232(8) 0.0040(7) 0.0087(6) 0.0018(6)
 C205 0.0325(10) 0.0339(10) 0.0214(9) -0.0021(7) 0.0080(8) 0.0049(8)

_geom_special_details
;
 All esds (except the esd in the dihedral angle between two l.s. planes)
 are estimated using the full covariance matrix.  The cell esds are taken
 into account individually in the estimation of esds in distances, angles
 and torsion angles; correlations between esds in cell parameters are only
 used when they are defined by crystal symmetry.  An approximate (isotropic)
 treatment of cell esds is used for estimating esds involving l.s. planes.
;
loop_
  _geom_bond_atom_site_label_1
  _geom_bond_atom_site_label_2
  _geom_bond_distance
  _geom_bond_site_symmetry_2
  _geom_bond_publ_flag
 Mg1 Br1 2.6502(6) . ?
 Mg1 Br2 2.7074(6) . ?
 Mg1 N3 2.1620(13) . ?
 Mg1 N6 2.1709(13) . ?
 Mg1 C1 2.3109(16) . ?
 Mg1 C11 2.3010(16) . ?
 N1 C1 1.3274(19) . ?
 N1 C2 1.4856(19) . ?
 N1 C12 1.4400(18) . ?
 N2 C1 1.3687(18) . ?
 N2 C3 1.4733(19) . ?
 N2 C4 1.3955(19) . ?
 N3 C4 1.334(2) . ?
 N3 C8 1.3349(19) . ?
 N4 C8 1.393(2) . ?
 N4 C9 1.4708(19) . ?
 N4 C11 1.3702(18) . ?
 N5 C10 1.483(2) . ?
 N5 C11 1.3257(19) . ?
 N5 C24 1.4419(19) . ?
 N6 C36 1.336(2) . ?
 N6 C40 1.338(2) . ?
 C2 H2A 0.9900 . ?
 C2 H2B 0.9900 . ?
 C2 C3 1.529(2) . ?
 C3 H3A 0.9900 . ?
 C3 H3B 0.9900 . ?
 C4 C5 1.391(2) . ?
 C5 H5 0.9500 . ?
 C5 C6 1.387(2) . ?
 C6 H6 0.9500 . ?
 C6 C7 1.387(2) . ?
 C7 H7 0.9500 . ?
 C7 C8 1.392(2) . ?
 C9 H9A 0.9900 . ?
 C9 H9B 0.9900 . ?
 C9 C10 1.526(2) . ?
 C10 H10A 0.9900 . ?
 C10 H10B 0.9900 . ?
 C12 C13 1.404(2) . ?
 C12 C17 1.405(2) . ?
 C13 C14 1.394(2) . ?
 C13 C18 1.522(2) . ?
 C14 H14 0.9500 . ?
 C14 C15 1.387(2) . ?
 C15 H15 0.9500 . ?
 C15 C16 1.382(2) . ?
 C16 H16 0.9500 . ?
 C16 C17 1.395(2) . ?
 C17 C21 1.518(2) . ?
 C18 H18 1.0000 . ?
 C18 C19 1.534(2) . ?
 C18 C20 1.538(2) . ?
 C19 H19A 0.9800 . ?
 C19 H19B 0.9800 . ?
 C19 H19C 0.9800 . ?
 C20 H20A 0.9800 . ?
 C20 H20B 0.9800 . ?
 C20 H20C 0.9800 . ?
 C21 H21 1.0000 . ?
 C21 C22 1.532(2) . ?
 C21 C23 1.526(2) . ?
 C22 H22A 0.9800 . ?
 C22 H22B 0.9800 . ?
 C22 H22C 0.9800 . ?
 C23 H23A 0.9800 . ?
 C23 H23B 0.9800 . ?
 C23 H23C 0.9800 . ?
 C24 C25 1.399(2) . ?
 C24 C29 1.406(2) . ?
 C25 C26 1.397(2) . ?
 C25 C30 1.517(2) . ?
 C26 H26 0.9500 . ?
 C26 C27 1.380(2) . ?
 C27 H27 0.9500 . ?
 C27 C28 1.379(2) . ?
 C28 H28 0.9500 . ?
 C28 C29 1.395(2) . ?
 C29 C33 1.519(2) . ?
 C30 H30 1.0000 . ?
 C30 C31 1.530(2) . ?
 C30 C32 1.529(2) . ?
 C31 H31A 0.9800 . ?
 C31 H31B 0.9800 . ?
 C31 H31C 0.9800 . ?
 C32 H32A 0.9800 . ?
 C32 H32B 0.9800 . ?
 C32 H32C 0.9800 . ?
 C33 H33 1.0000 . ?
 C33 C34 1.530(3) . ?
 C33 C35 1.530(2) . ?
 C34 H34A 0.9800 . ?
 C34 H34B 0.9800 . ?
 C34 H34C 0.9800 . ?
 C35 H35A 0.9800 . ?
 C35 H35B 0.9800 . ?
 C35 H35C 0.9800 . ?
 C36 H36 0.9500 . ?
 C36 C37 1.387(3) . ?
 C37 H37 0.9500 . ?
 C37 C38 1.377(3) . ?
 C38 H38 0.9500 . ?
 C38 C39 1.374(3) . ?
 C39 H39 0.9500 . ?
 C39 C40 1.379(2) . ?
 C40 H40 0.9500 . ?
 N100 C101 1.320(3) . ?
 N100 C105 1.347(3) . ?
 C101 H101 0.9500 . ?
 C101 C102 1.361(4) . ?
 C102 H102 0.9500 . ?
 C102 C103 1.397(4) . ?
 C103 H103 0.9500 . ?
 C103 C104 1.392(3) . ?
 C104 H104 0.9500 . ?
 C104 C105 1.367(3) . ?
 C105 H105 0.9500 . ?
 N200 C201 1.336(2) . ?
 N200 C205 1.343(2) . ?
 C201 H201 0.9500 . ?
 C201 C202 1.376(3) . ?
 C202 H202 0.9500 . ?
 C202 C203 1.386(2) . ?
 C203 H203 0.9500 . ?
 C203 C204 1.381(2) . ?
 C204 H204 0.9500 . ?
 C204 C205 1.378(2) . ?
 C205 H205 0.9500 . ?

loop_
  _geom_angle_atom_site_label_1
  _geom_angle_atom_site_label_2
  _geom_angle_atom_site_label_3
  _geom_angle
  _geom_angle_site_symmetry_1
  _geom_angle_site_symmetry_3
  _geom_angle_publ_flag
 Br1 Mg1 Br2 175.34(2) . . ?
 N3 Mg1 Br1 89.27(4) . . ?
 N3 Mg1 Br2 86.08(4) . . ?
 N3 Mg1 N6 178.15(6) . . ?
 N3 Mg1 C1 73.15(5) . . ?
 N3 Mg1 C11 73.40(5) . . ?
 N6 Mg1 Br1 92.58(4) . . ?
 N6 Mg1 Br2 92.06(4) . . ?
 N6 Mg1 C1 106.71(5) . . ?
 N6 Mg1 C11 106.70(5) . . ?
 C1 Mg1 Br1 92.94(4) . . ?
 C1 Mg1 Br2 86.10(4) . . ?
 C11 Mg1 Br1 87.40(4) . . ?
 C11 Mg1 Br2 90.90(4) . . ?
 C11 Mg1 C1 146.54(6) . . ?
 C1 N1 C2 114.33(12) . . ?
 C1 N1 C12 125.55(12) . . ?
 C12 N1 C2 119.71(12) . . ?
 C1 N2 C3 114.49(12) . . ?
 C1 N2 C4 122.06(13) . . ?
 C4 N2 C3 122.80(12) . . ?
 C4 N3 Mg1 120.57(10) . . ?
 C4 N3 C8 119.22(13) . . ?
 C8 N3 Mg1 120.21(10) . . ?
 C8 N4 C9 123.10(12) . . ?
 C11 N4 C8 122.10(13) . . ?
 C11 N4 C9 114.53(12) . . ?
 C11 N5 C10 114.63(13) . . ?
 C11 N5 C24 125.20(13) . . ?
 C24 N5 C10 120.04(12) . . ?
 C36 N6 Mg1 122.66(11) . . ?
 C36 N6 C40 117.59(14) . . ?
 C40 N6 Mg1 119.70(11) . . ?
 N1 C1 Mg1 143.95(11) . . ?
 N1 C1 N2 106.17(13) . . ?
 N2 C1 Mg1 109.88(10) . . ?
 N1 C2 H2A 111.3 . . ?
 N1 C2 H2B 111.3 . . ?
 N1 C2 C3 102.48(12) . . ?
 H2A C2 H2B 109.2 . . ?
 C3 C2 H2A 111.3 . . ?
 C3 C2 H2B 111.3 . . ?
 N2 C3 C2 101.38(12) . . ?
 N2 C3 H3A 111.5 . . ?
 N2 C3 H3B 111.5 . . ?
 C2 C3 H3A 111.5 . . ?
 C2 C3 H3B 111.5 . . ?
 H3A C3 H3B 109.3 . . ?
 N3 C4 N2 114.09(13) . . ?
 N3 C4 C5 122.65(14) . . ?
 C5 C4 N2 123.26(14) . . ?
 C4 C5 H5 121.4 . . ?
 C6 C5 C4 117.26(15) . . ?
 C6 C5 H5 121.4 . . ?
 C5 C6 H6 119.5 . . ?
 C5 C6 C7 121.03(14) . . ?
 C7 C6 H6 119.5 . . ?
 C6 C7 H7 121.5 . . ?
 C6 C7 C8 117.08(15) . . ?
 C8 C7 H7 121.5 . . ?
 N3 C8 N4 114.12(13) . . ?
 N3 C8 C7 122.74(14) . . ?
 C7 C8 N4 123.13(14) . . ?
 N4 C9 H9A 111.4 . . ?
 N4 C9 H9B 111.4 . . ?
 N4 C9 C10 101.75(12) . . ?
 H9A C9 H9B 109.3 . . ?
 C10 C9 H9A 111.4 . . ?
 C10 C9 H9B 111.4 . . ?
 N5 C10 C9 102.51(12) . . ?
 N5 C10 H10A 111.3 . . ?
 N5 C10 H10B 111.3 . . ?
 C9 C10 H10A 111.3 . . ?
 C9 C10 H10B 111.3 . . ?
 H10A C10 H10B 109.2 . . ?
 N4 C11 Mg1 109.81(10) . . ?
 N5 C11 Mg1 144.15(11) . . ?
 N5 C11 N4 106.02(13) . . ?
 C13 C12 N1 118.80(13) . . ?
 C13 C12 C17 122.12(14) . . ?
 C17 C12 N1 119.01(13) . . ?
 C12 C13 C18 123.18(14) . . ?
 C14 C13 C12 117.50(14) . . ?
 C14 C13 C18 119.32(14) . . ?
 C13 C14 H14 119.2 . . ?
 C15 C14 C13 121.55(15) . . ?
 C15 C14 H14 119.2 . . ?
 C14 C15 H15 120.1 . . ?
 C16 C15 C14 119.73(15) . . ?
 C16 C15 H15 120.1 . . ?
 C15 C16 H16 119.3 . . ?
 C15 C16 C17 121.32(15) . . ?
 C17 C16 H16 119.3 . . ?
 C12 C17 C21 122.83(13) . . ?
 C16 C17 C12 117.77(14) . . ?
 C16 C17 C21 119.40(14) . . ?
 C13 C18 H18 108.4 . . ?
 C13 C18 C19 110.38(14) . . ?
 C13 C18 C20 111.44(14) . . ?
 C19 C18 H18 108.4 . . ?
 C19 C18 C20 109.78(14) . . ?
 C20 C18 H18 108.4 . . ?
 C18 C19 H19A 109.5 . . ?
 C18 C19 H19B 109.5 . . ?
 C18 C19 H19C 109.5 . . ?
 H19A C19 H19B 109.5 . . ?
 H19A C19 H19C 109.5 . . ?
 H19B C19 H19C 109.5 . . ?
 C18 C20 H20A 109.5 . . ?
 C18 C20 H20B 109.5 . . ?
 C18 C20 H20C 109.5 . . ?
 H20A C20 H20B 109.5 . . ?
 H20A C20 H20C 109.5 . . ?
 H20B C20 H20C 109.5 . . ?
 C17 C21 H21 108.1 . . ?
 C17 C21 C22 110.79(13) . . ?
 C17 C21 C23 110.94(13) . . ?
 C22 C21 H21 108.1 . . ?
 C23 C21 H21 108.1 . . ?
 C23 C21 C22 110.63(14) . . ?
 C21 C22 H22A 109.5 . . ?
 C21 C22 H22B 109.5 . . ?
 C21 C22 H22C 109.5 . . ?
 H22A C22 H22B 109.5 . . ?
 H22A C22 H22C 109.5 . . ?
 H22B C22 H22C 109.5 . . ?
 C21 C23 H23A 109.5 . . ?
 C21 C23 H23B 109.5 . . ?
 C21 C23 H23C 109.5 . . ?
 H23A C23 H23B 109.5 . . ?
 H23A C23 H23C 109.5 . . ?
 H23B C23 H23C 109.5 . . ?
 C25 C24 N5 118.97(14) . . ?
 C25 C24 C29 122.29(14) . . ?
 C29 C24 N5 118.70(14) . . ?
 C24 C25 C30 122.81(14) . . ?
 C26 C25 C24 117.45(15) . . ?
 C26 C25 C30 119.73(14) . . ?
 C25 C26 H26 119.3 . . ?
 C27 C26 C25 121.43(15) . . ?
 C27 C26 H26 119.3 . . ?
 C26 C27 H27 120.0 . . ?
 C28 C27 C26 119.99(15) . . ?
 C28 C27 H27 120.0 . . ?
 C27 C28 H28 119.3 . . ?
 C27 C28 C29 121.34(16) . . ?
 C29 C28 H28 119.3 . . ?
 C24 C29 C33 122.66(14) . . ?
 C28 C29 C24 117.49(15) . . ?
 C28 C29 C33 119.83(15) . . ?
 C25 C30 H30 108.2 . . ?
 C25 C30 C31 110.62(14) . . ?
 C25 C30 C32 111.40(14) . . ?
 C31 C30 H30 108.2 . . ?
 C32 C30 H30 108.2 . . ?
 C32 C30 C31 110.20(14) . . ?
 C30 C31 H31A 109.5 . . ?
 C30 C31 H31B 109.5 . . ?
 C30 C31 H31C 109.5 . . ?
 H31A C31 H31B 109.5 . . ?
 H31A C31 H31C 109.5 . . ?
 H31B C31 H31C 109.5 . . ?
 C30 C32 H32A 109.5 . . ?
 C30 C32 H32B 109.5 . . ?
 C30 C32 H32C 109.5 . . ?
 H32A C32 H32B 109.5 . . ?
 H32A C32 H32C 109.5 . . ?
 H32B C32 H32C 109.5 . . ?
 C29 C33 H33 107.9 . . ?
 C29 C33 C34 110.83(15) . . ?
 C29 C33 C35 112.97(15) . . ?
 C34 C33 H33 107.9 . . ?
 C34 C33 C35 109.26(15) . . ?
 C35 C33 H33 107.9 . . ?
 C33 C34 H34A 109.5 . . ?
 C33 C34 H34B 109.5 . . ?
 C33 C34 H34C 109.5 . . ?
 H34A C34 H34B 109.5 . . ?
 H34A C34 H34C 109.5 . . ?
 H34B C34 H34C 109.5 . . ?
 C33 C35 H35A 109.5 . . ?
 C33 C35 H35B 109.5 . . ?
 C33 C35 H35C 109.5 . . ?
 H35A C35 H35B 109.5 . . ?
 H35A C35 H35C 109.5 . . ?
 H35B C35 H35C 109.5 . . ?
 N6 C36 H36 118.7 . . ?
 N6 C36 C37 122.59(18) . . ?
 C37 C36 H36 118.7 . . ?
 C36 C37 H37 120.4 . . ?
 C38 C37 C36 119.13(19) . . ?
 C38 C37 H37 120.4 . . ?
 C37 C38 H38 120.7 . . ?
 C39 C38 C37 118.51(18) . . ?
 C39 C38 H38 120.7 . . ?
 C38 C39 H39 120.4 . . ?
 C38 C39 C40 119.16(19) . . ?
 C40 C39 H39 120.4 . . ?
 N6 C40 C39 123.01(18) . . ?
 N6 C40 H40 118.5 . . ?
 C39 C40 H40 118.5 . . ?
 C101 N100 C105 116.0(3) . . ?
 N100 C101 H101 117.9 . . ?
 N100 C101 C102 124.3(3) . . ?
 C102 C101 H101 117.9 . . ?
 C101 C102 H102 120.4 . . ?
 C101 C102 C103 119.2(2) . . ?
 C103 C102 H102 120.4 . . ?
 C102 C103 H103 121.0 . . ?
 C104 C103 C102 118.0(3) . . ?
 C104 C103 H103 121.0 . . ?
 C103 C104 H104 121.3 . . ?
 C105 C104 C103 117.5(3) . . ?
 C105 C104 H104 121.3 . . ?
 N100 C105 C104 125.1(2) . . ?
 N100 C105 H105 117.4 . . ?
 C104 C105 H105 117.4 . . ?
 C201 N200 C205 116.33(16) . . ?
 N200 C201 H201 118.0 . . ?
 N200 C201 C202 124.01(17) . . ?
 C202 C201 H201 118.0 . . ?
 C201 C202 H202 120.7 . . ?
 C201 C202 C203 118.52(16) . . ?
 C203 C202 H202 120.7 . . ?
 C202 C203 H203 120.6 . . ?
 C204 C203 C202 118.71(16) . . ?
 C204 C203 H203 120.6 . . ?
 C203 C204 H204 120.8 . . ?
 C205 C204 C203 118.42(16) . . ?
 C205 C204 H204 120.8 . . ?
 N200 C205 C204 124.00(17) . . ?
 N200 C205 H205 118.0 . . ?
 C204 C205 H205 118.0 . . ?

loop_
  _geom_torsion_atom_site_label_1
  _geom_torsion_atom_site_label_2
  _geom_torsion_atom_site_label_3
  _geom_torsion_atom_site_label_4
  _geom_torsion
  _geom_torsion_site_symmetry_1
  _geom_torsion_site_symmetry_2
  _geom_torsion_site_symmetry_3
  _geom_torsion_site_symmetry_4
  _geom_torsion_publ_flag
 Mg1 N3 C4 N2 -1.35(18) . . . . ?
 Mg1 N3 C4 C5 179.08(12) . . . . ?
 Mg1 N3 C8 N4 -0.08(18) . . . . ?
 Mg1 N3 C8 C7 -179.48(12) . . . . ?
 Mg1 N6 C36 C37 -176.27(15) . . . . ?
 Mg1 N6 C40 C39 177.20(15) . . . . ?
 N1 C2 C3 N2 -9.98(16) . . . . ?
 N1 C12 C13 C14 -176.02(13) . . . . ?
 N1 C12 C13 C18 3.4(2) . . . . ?
 N1 C12 C17 C16 176.31(13) . . . . ?
 N1 C12 C17 C21 -2.7(2) . . . . ?
 N2 C4 C5 C6 -178.63(15) . . . . ?
 N3 C4 C5 C6 0.9(2) . . . . ?
 N4 C9 C10 N5 -6.62(17) . . . . ?
 N5 C24 C25 C26 176.40(14) . . . . ?
 N5 C24 C25 C30 -2.5(2) . . . . ?
 N5 C24 C29 C28 -176.57(14) . . . . ?
 N5 C24 C29 C33 1.9(2) . . . . ?
 N6 C36 C37 C38 -0.7(3) . . . . ?
 C1 N1 C2 C3 9.65(18) . . . . ?
 C1 N1 C12 C13 -101.49(18) . . . . ?
 C1 N1 C12 C17 81.33(19) . . . . ?
 C1 N2 C3 C2 8.72(17) . . . . ?
 C1 N2 C4 N3 -3.1(2) . . . . ?
 C1 N2 C4 C5 176.46(14) . . . . ?
 C2 N1 C1 Mg1 176.24(14) . . . . ?
 C2 N1 C1 N2 -4.48(17) . . . . ?
 C2 N1 C12 C13 86.26(18) . . . . ?
 C2 N1 C12 C17 -90.92(17) . . . . ?
 C3 N2 C1 Mg1 176.43(10) . . . . ?
 C3 N2 C1 N1 -3.12(17) . . . . ?
 C3 N2 C4 N3 -173.37(14) . . . . ?
 C3 N2 C4 C5 6.2(2) . . . . ?
 C4 N2 C1 Mg1 5.42(17) . . . . ?
 C4 N2 C1 N1 -174.13(13) . . . . ?
 C4 N2 C3 C2 179.66(14) . . . . ?
 C4 N3 C8 N4 -179.71(14) . . . . ?
 C4 N3 C8 C7 0.9(2) . . . . ?
 C4 C5 C6 C7 -0.1(2) . . . . ?
 C5 C6 C7 C8 -0.3(2) . . . . ?
 C6 C7 C8 N3 -0.1(2) . . . . ?
 C6 C7 C8 N4 -179.48(15) . . . . ?
 C8 N3 C4 N2 178.28(13) . . . . ?
 C8 N3 C4 C5 -1.3(2) . . . . ?
 C8 N4 C9 C10 178.74(15) . . . . ?
 C8 N4 C11 Mg1 6.85(18) . . . . ?
 C8 N4 C11 N5 -174.28(14) . . . . ?
 C9 N4 C8 N3 -178.68(14) . . . . ?
 C9 N4 C8 C7 0.7(2) . . . . ?
 C9 N4 C11 Mg1 -178.90(10) . . . . ?
 C9 N4 C11 N5 -0.03(18) . . . . ?
 C10 N5 C11 Mg1 173.18(15) . . . . ?
 C10 N5 C11 N4 -5.00(18) . . . . ?
 C10 N5 C24 C25 -89.96(18) . . . . ?
 C10 N5 C24 C29 87.62(19) . . . . ?
 C11 N4 C8 N3 -4.9(2) . . . . ?
 C11 N4 C8 C7 174.46(15) . . . . ?
 C11 N4 C9 C10 4.56(18) . . . . ?
 C11 N5 C10 C9 7.67(19) . . . . ?
 C11 N5 C24 C25 85.53(19) . . . . ?
 C11 N5 C24 C29 -96.89(19) . . . . ?
 C12 N1 C1 Mg1 3.6(3) . . . . ?
 C12 N1 C1 N2 -177.09(13) . . . . ?
 C12 N1 C2 C3 -177.27(13) . . . . ?
 C12 C13 C14 C15 -0.8(2) . . . . ?
 C12 C13 C18 C19 -107.32(18) . . . . ?
 C12 C13 C18 C20 130.42(16) . . . . ?
 C12 C17 C21 C22 106.40(17) . . . . ?
 C12 C17 C21 C23 -130.30(15) . . . . ?
 C13 C12 C17 C16 -0.8(2) . . . . ?
 C13 C12 C17 C21 -179.81(14) . . . . ?
 C13 C14 C15 C16 0.3(3) . . . . ?
 C14 C13 C18 C19 72.1(2) . . . . ?
 C14 C13 C18 C20 -50.2(2) . . . . ?
 C14 C15 C16 C17 0.0(3) . . . . ?
 C15 C16 C17 C12 0.2(2) . . . . ?
 C15 C16 C17 C21 179.28(15) . . . . ?
 C16 C17 C21 C22 -72.61(18) . . . . ?
 C16 C17 C21 C23 50.68(19) . . . . ?
 C17 C12 C13 C14 1.1(2) . . . . ?
 C17 C12 C13 C18 -179.51(14) . . . . ?
 C18 C13 C14 C15 179.74(15) . . . . ?
 C24 N5 C10 C9 -176.38(13) . . . . ?
 C24 N5 C11 Mg1 -2.5(3) . . . . ?
 C24 N5 C11 N4 179.29(14) . . . . ?
 C24 C25 C26 C27 0.4(2) . . . . ?
 C24 C25 C30 C31 109.99(18) . . . . ?
 C24 C25 C30 C32 -127.08(16) . . . . ?
 C24 C29 C33 C34 -103.41(19) . . . . ?
 C24 C29 C33 C35 133.59(17) . . . . ?
 C25 C24 C29 C28 0.9(2) . . . . ?
 C25 C24 C29 C33 179.39(15) . . . . ?
 C25 C26 C27 C28 0.4(3) . . . . ?
 C26 C25 C30 C31 -68.94(19) . . . . ?
 C26 C25 C30 C32 54.0(2) . . . . ?
 C26 C27 C28 C29 -0.6(3) . . . . ?
 C27 C28 C29 C24 -0.1(2) . . . . ?
 C27 C28 C29 C33 -178.56(16) . . . . ?
 C28 C29 C33 C34 75.0(2) . . . . ?
 C28 C29 C33 C35 -48.0(2) . . . . ?
 C29 C24 C25 C26 -1.1(2) . . . . ?
 C29 C24 C25 C30 179.96(14) . . . . ?
 C30 C25 C26 C27 179.38(15) . . . . ?
 C36 N6 C40 C39 -0.1(3) . . . . ?
 C36 C37 C38 C39 -0.5(3) . . . . ?
 C37 C38 C39 C40 1.3(3) . . . . ?
 C38 C39 C40 N6 -1.0(3) . . . . ?
 C40 N6 C36 C37 1.0(3) . . . . ?
 N100 C101 C102 C103 1.5(4) . . . . ?
 C101 N100 C105 C104 0.1(4) . . . . ?
 C101 C102 C103 C104 -1.0(4) . . . . ?
 C102 C103 C104 C105 0.1(3) . . . . ?
 C103 C104 C105 N100 0.3(4) . . . . ?
 C105 N100 C101 C102 -1.0(4) . . . . ?
 N200 C201 C202 C203 -1.1(3) . . . . ?
 C201 N200 C205 C204 0.2(3) . . . . ?
 C201 C202 C203 C204 0.6(3) . . . . ?
 C202 C203 C204 C205 0.2(3) . . . . ?
 C203 C204 C205 N200 -0.6(3) . . . . ?
 C205 N200 C201 C202 0.7(3) . . . . ?

_shelx_res_file
;
TITL JM1901 in P2(1)/n, MESSELBERGER/MUNZ, MJ125
    jm1901.res
    created by SHELXL-2016/6 at 13:13:23 on 27-Feb-2019
CELL 0.71073 19.086 12.8472 20.6882 90 111.643 90
ZERR 4 0.0008 0.0006 0.0008 0 0.001 0
LATT 1
SYMM 0.5-X,0.5+Y,0.5-Z
SFAC C H Br Mg N
UNIT 200 240 8 4 32

L.S. 10
PLAN  20
SIZE 0.15 0.13 0.08
TEMP -173
BOND $H
HTAB
CONF
WPDB -1
LIST 4
fmap 2
acta
REM <olex2.extras>
REM <HklSrc "%.\\jm1901.hkl">
REM </olex2.extras>

WGHT    0.022800    3.328200
FVAR       0.31357
MG1   4    0.777582    0.548322    0.511980    11.00000    0.01449    0.01264 =
         0.01822    0.00119    0.00904    0.00192
BR1   3    0.892893    0.592864    0.627819    11.00000    0.01489    0.01809 =
         0.02285   -0.00246    0.00470    0.00072
BR2   3    0.667894    0.501865    0.388365    11.00000    0.02193    0.02377 =
         0.01743    0.00004    0.00443    0.00057
N1    5    0.738988    0.806770    0.462395    11.00000    0.01499    0.01095 =
         0.01494    0.00113    0.00652    0.00036
N2    5    0.823487    0.724678    0.436288    11.00000    0.01550    0.01298 =
         0.01633    0.00224    0.00789    0.00123
N3    5    0.853023    0.551755    0.455602    11.00000    0.01388    0.01410 =
         0.01787    0.00014    0.00743    0.00102
N4    5    0.871290    0.377770    0.480028    11.00000    0.01659    0.01368 =
         0.02092    0.00075    0.01112    0.00405
N5    5    0.828797    0.289568    0.546239    11.00000    0.01566    0.01290 =
         0.01947   -0.00069    0.00933    0.00207
N6    5    0.698841    0.543779    0.565461    11.00000    0.01526    0.01373 =
         0.02007   -0.00013    0.00833    0.00128
C1    1    0.772869    0.715042    0.468637    11.00000    0.01273    0.01446 =
         0.01298   -0.00072    0.00374    0.00007
C2    1    0.769511    0.888450    0.429204    11.00000    0.02804    0.01420 =
         0.02824    0.00525    0.01781    0.00141
AFIX  23
H2A   2    0.797627    0.941981    0.463339    11.00000   -1.20000
H2B   2    0.728789    0.922511    0.390386    11.00000   -1.20000
AFIX   0
C3    1    0.821967    0.826353    0.402857    11.00000    0.02202    0.01399 =
         0.02022    0.00246    0.01125   -0.00091
AFIX  23
H3A   2    0.801191    0.820453    0.351526    11.00000   -1.20000
H3B   2    0.872816    0.857925    0.418105    11.00000   -1.20000
AFIX   0
C4    1    0.864760    0.640052    0.427187    11.00000    0.01391    0.01515 =
         0.01493   -0.00001    0.00522    0.00051
C5    1    0.913525    0.646429    0.391306    11.00000    0.01769    0.01956 =
         0.02026    0.00152    0.01041   -0.00104
AFIX  43
H5    2    0.921656    0.710296    0.372004    11.00000   -1.20000
AFIX   0
C6    1    0.949805    0.555715    0.384856    11.00000    0.01765    0.02577 =
         0.02169    0.00047    0.01222   -0.00004
AFIX  43
H6    2    0.983449    0.557243    0.360590    11.00000   -1.20000
AFIX   0
C7    1    0.937731    0.462797    0.413285    11.00000    0.01673    0.02024 =
         0.02053   -0.00074    0.00995    0.00338
AFIX  43
H7    2    0.962241    0.400325    0.408901    11.00000   -1.20000
AFIX   0
C8    1    0.888119    0.465099    0.448523    11.00000    0.01349    0.01581 =
         0.01743   -0.00020    0.00680    0.00049
C9    1    0.904958    0.274851    0.479813    11.00000    0.01950    0.01510 =
         0.02282   -0.00069    0.01074    0.00455
AFIX  23
H9A   2    0.960553    0.277074    0.502640    11.00000   -1.20000
H9B   2    0.891169    0.247641    0.431940    11.00000   -1.20000
AFIX   0
C10   1    0.869626    0.210059    0.521688    11.00000    0.03436    0.01491 =
         0.03729    0.00213    0.02492    0.00635
AFIX  23
H10A  2    0.834569    0.157248    0.492132    11.00000   -1.20000
H10B  2    0.908690    0.174815    0.561226    11.00000   -1.20000
AFIX   0
C11   1    0.827230    0.383577    0.519312    11.00000    0.01271    0.01553 =
         0.01517   -0.00181    0.00522   -0.00023
C12   1    0.683570    0.833980    0.491508    11.00000    0.01508    0.01003 =
         0.01793    0.00155    0.00725    0.00136
C13   1    0.607158    0.834756    0.447865    11.00000    0.01652    0.01156 =
         0.01790   -0.00009    0.00430   -0.00004
C14   1    0.555248    0.867748    0.476432    11.00000    0.01289    0.01771 =
         0.02541   -0.00097    0.00510    0.00105
AFIX  43
H14   2    0.503240    0.869884    0.447876    11.00000   -1.20000
AFIX   0
C15   1    0.577737    0.897545    0.545595    11.00000    0.01682    0.02158 =
         0.02643   -0.00362    0.01063    0.00105
AFIX  43
H15   2    0.541356    0.919475    0.564036    11.00000   -1.20000
AFIX   0
C16   1    0.653281    0.895193    0.587547    11.00000    0.02001    0.02038 =
         0.01755   -0.00303    0.00835    0.00109
AFIX  43
H16   2    0.668331    0.915660    0.634864    11.00000   -1.20000
AFIX   0
C17   1    0.707874    0.863365    0.561804    11.00000    0.01454    0.01260 =
         0.01655    0.00085    0.00506    0.00067
C18   1    0.579280    0.802510    0.371723    11.00000    0.01837    0.02118 =
         0.01696   -0.00110    0.00295   -0.00046
AFIX  13
H18   2    0.621927    0.768734    0.362589    11.00000   -1.20000
AFIX   0
C19   1    0.553924    0.898285    0.324515    11.00000    0.04850    0.02737 =
         0.02232    0.00240   -0.00022   -0.00652
AFIX 137
H19A  2    0.512089    0.932409    0.332818    11.00000   -1.50000
H19B  2    0.537351    0.876569    0.275748    11.00000   -1.50000
H19C  2    0.596133    0.947060    0.334823    11.00000   -1.50000
AFIX   0
C20   1    0.514078    0.723993    0.354237    11.00000    0.02225    0.02476 =
         0.02358   -0.00471    0.00372   -0.00344
AFIX 137
H20A  2    0.531282    0.661530    0.382932    11.00000   -1.50000
H20B  2    0.497354    0.704947    0.304976    11.00000   -1.50000
H20C  2    0.472046    0.755466    0.363660    11.00000   -1.50000
AFIX   0
C21   1    0.790270    0.863311    0.609678    11.00000    0.01470    0.01788 =
         0.01516   -0.00164    0.00387    0.00127
AFIX  13
H21   2    0.819605    0.825678    0.585637    11.00000   -1.20000
AFIX   0
C22   1    0.820683    0.974702    0.624517    11.00000    0.01880    0.01952 =
         0.03228   -0.00261    0.00552   -0.00168
AFIX 137
H22A  2    0.815881    1.008834    0.580721    11.00000   -1.50000
H22B  2    0.873878    0.972902    0.655341    11.00000   -1.50000
H22C  2    0.791742    1.013615    0.646982    11.00000   -1.50000
AFIX   0
C23   1    0.801244    0.806089    0.677374    11.00000    0.02470    0.02496 =
         0.01834    0.00194    0.00651    0.00550
AFIX 137
H23A  2    0.774247    0.843049    0.702557    11.00000   -1.50000
H23B  2    0.855081    0.803343    0.706165    11.00000   -1.50000
H23C  2    0.781449    0.735133    0.666868    11.00000   -1.50000
AFIX   0
C24   1    0.790616    0.260110    0.591996    11.00000    0.01770    0.01057 =
         0.02096   -0.00055    0.01020    0.00036
C25   1    0.715212    0.228621    0.563075    11.00000    0.01637    0.01296 =
         0.02319   -0.00126    0.00879    0.00220
C26   1    0.681271    0.194926    0.608730    11.00000    0.01693    0.02057 =
         0.02923   -0.00333    0.01166   -0.00177
AFIX  43
H26   2    0.630213    0.172669    0.590530    11.00000   -1.20000
AFIX   0
C27   1    0.720297    0.193259    0.679724    11.00000    0.02722    0.02283 =
         0.02676   -0.00178    0.01829   -0.00332
AFIX  43
H27   2    0.696185    0.169577    0.709793    11.00000   -1.20000
AFIX   0
C28   1    0.794310    0.225985    0.706996    11.00000    0.02789    0.01987 =
         0.02162   -0.00265    0.01222   -0.00216
AFIX  43
H28   2    0.820519    0.225171    0.755955    11.00000   -1.20000
AFIX   0
C29   1    0.831449    0.260242    0.664158    11.00000    0.02039    0.01308 =
         0.02142   -0.00211    0.00880   -0.00179
C30   1    0.670536    0.228175    0.485368    11.00000    0.01722    0.01787 =
         0.02228    0.00024    0.00654    0.00178
AFIX  13
H30   2    0.701510    0.263134    0.461853    11.00000   -1.20000
AFIX   0
C31   1    0.654805    0.116561    0.458040    11.00000    0.03733    0.02093 =
         0.02589   -0.00270    0.00509    0.00255
AFIX 137
H31A  2    0.702653    0.080125    0.467360    11.00000   -1.50000
H31B  2    0.626044    0.117806    0.407818    11.00000   -1.50000
H31C  2    0.625640    0.080258    0.481436    11.00000   -1.50000
AFIX   0
C32   1    0.596614    0.288271    0.467274    11.00000    0.01755    0.02275 =
         0.03804    0.00530    0.00789    0.00208
AFIX 137
H32A  2    0.564226    0.253049    0.487783    11.00000   -1.50000
H32B  2    0.570924    0.291127    0.416635    11.00000   -1.50000
H32C  2    0.607307    0.359163    0.485807    11.00000   -1.50000
AFIX   0
C33   1    0.913557    0.293291    0.695995    11.00000    0.02251    0.02568 =
         0.02091   -0.00177    0.00667   -0.00823
AFIX  13
H33   2    0.926464    0.330171    0.659284    11.00000   -1.20000
AFIX   0
C34   1    0.965197    0.198400    0.719329    11.00000    0.02206    0.04302 =
         0.05606   -0.01735    0.00579    0.00000
AFIX 137
H34A  2    0.954866    0.162194    0.756556    11.00000   -1.50000
H34B  2    1.017928    0.221099    0.736524    11.00000   -1.50000
H34C  2    0.955881    0.151112    0.679858    11.00000   -1.50000
AFIX   0
C35   1    0.929324    0.367790    0.757461    11.00000    0.03424    0.02593 =
         0.02738   -0.00518    0.00168   -0.00484
AFIX 137
H35A  2    0.897090    0.429391    0.742426    11.00000   -1.50000
H35B  2    0.982363    0.389048    0.774478    11.00000   -1.50000
H35C  2    0.918616    0.332644    0.794845    11.00000   -1.50000
AFIX   0
C36   1    0.715746    0.500137    0.628007    11.00000    0.03077    0.02638 =
         0.02489    0.00579    0.01513    0.00698
AFIX  43
H36   2    0.765165    0.473585    0.651217    11.00000   -1.20000
AFIX   0
C37   1    0.663977    0.492069    0.660393    11.00000    0.06011    0.03650 =
         0.03931    0.00812    0.03661    0.00336
AFIX  43
H37   2    0.677696    0.459896    0.704697    11.00000   -1.20000
AFIX   0
C38   1    0.592438    0.531309    0.627478    11.00000    0.04830    0.03841 =
         0.06479   -0.00978    0.04735   -0.00693
AFIX  43
H38   2    0.555839    0.526241    0.648398    11.00000   -1.20000
AFIX   0
C39   1    0.575180    0.577946    0.563714    11.00000    0.02156    0.03838 =
         0.05593   -0.00833    0.02105    0.00370
AFIX  43
H39   2    0.526621    0.607015    0.540197    11.00000   -1.20000
AFIX   0
C40   1    0.629225    0.582027    0.534285    11.00000    0.01939    0.02471 =
         0.03143    0.00095    0.01042    0.00543
AFIX  43
H40   2    0.616459    0.613433    0.489836    11.00000   -1.20000
AFIX   0

N100  5    0.832469    0.643572    0.205634    11.00000    0.07443    0.06614 =
         0.03741    0.01657    0.01632    0.00323
C101  1    0.792447    0.592539    0.235493    11.00000    0.06389    0.06482 =
         0.03688    0.01193   -0.00108   -0.01965
AFIX  43
H101  2    0.806190    0.522606    0.249322    11.00000   -1.20000
AFIX   0
C102  1    0.732792    0.633583    0.247750    11.00000    0.05100    0.09038 =
         0.03107    0.01543   -0.00372   -0.04208
AFIX  43
H102  2    0.706865    0.593493    0.270464    11.00000   -1.20000
AFIX   0
C103  1    0.710154    0.735461    0.226498    11.00000    0.03303    0.10211 =
         0.04279   -0.00339    0.00537   -0.02482
AFIX  43
H103  2    0.668237    0.765797    0.233724    11.00000   -1.20000
AFIX   0
C104  1    0.750898    0.791117    0.194424    11.00000    0.03813    0.06025 =
         0.02452    0.00052    0.00169   -0.01496
AFIX  43
H104  2    0.737869    0.860663    0.179097    11.00000   -1.20000
AFIX   0
C105  1    0.810393    0.741931    0.185801    11.00000    0.05367    0.05564 =
         0.02444    0.00945    0.01173   -0.00822
AFIX  43
H105  2    0.838345    0.780102    0.164132    11.00000   -1.20000
AFIX   0

N200  5    0.532242    0.492455    0.101720    11.00000    0.03601    0.02902 =
         0.02781   -0.00354    0.00740    0.00799
C201  1    0.558191    0.500735    0.170964    11.00000    0.02263    0.02407 =
         0.02768    0.00295    0.00559    0.00308
AFIX  43
H201  2    0.588308    0.445624    0.197656    11.00000   -1.20000
AFIX   0
C202  1    0.543956    0.584216    0.205982    11.00000    0.02117    0.03263 =
         0.01968   -0.00031    0.00462    0.00179
AFIX  43
H202  2    0.563005    0.585782    0.255369    11.00000   -1.20000
AFIX   0
C203  1    0.501200    0.665976    0.167584    11.00000    0.02041    0.02584 =
         0.02387   -0.00342    0.00883    0.00140
AFIX  43
H203  2    0.490770    0.725077    0.190144    11.00000   -1.20000
AFIX   0
C204  1    0.474070    0.659831    0.095909    11.00000    0.01693    0.02511 =
         0.02323    0.00396    0.00867    0.00175
AFIX  43
H204  2    0.444715    0.714610    0.068095    11.00000   -1.20000
AFIX   0
C205  1    0.490589    0.572357    0.065691    11.00000    0.03246    0.03386 =
         0.02144   -0.00208    0.00802    0.00487
AFIX  43
H205  2    0.471345    0.568311    0.016365    11.00000   -1.20000
AFIX   0
HKLF 4


REM  JM1901 in P2(1)/n, MESSELBERGER/MUNZ, MJ125
REM R1 =  0.0307 for   10646 Fo > 4sig(Fo)  and  0.0474 for all   13232 data
REM    558 parameters refined using      0 restraints

END

WGHT      0.0228      3.3283

REM Instructions for potential hydrogen bonds
EQIV $1 -x+3/2, y+1/2, -z+1/2
HTAB C3 N200_$1
EQIV $2 -x+2, -y+1, -z+1
HTAB C7 Br1_$2
HTAB C36 Br1
HTAB C40 Br2
HTAB C102 Br2
HTAB C105 Br2_$1
HTAB C202 Br2
EQIV $3 x-1/2, -y+3/2, z-1/2
HTAB C204 Br1_$3
EQIV $4 -x+1, -y+1, -z
HTAB C205 N200_$4

REM Highest difference peak  0.537,  deepest hole -0.400,  1-sigma level  0.061
Q1    1   0.7056  0.6899  0.2609  11.00000  0.05    0.54
Q2    1   0.6908  0.7931  0.2312  11.00000  0.05    0.48
Q3    1   0.8500  0.3788  0.4986  11.00000  0.05    0.39
Q4    1   0.5497  0.7658  0.3703  11.00000  0.05    0.36
Q5    1   0.7811  0.6391  0.1954  11.00000  0.05    0.35
Q6    1   0.7494  0.8651  0.5817  11.00000  0.05    0.35
Q7    1   0.9218  0.4750  0.4358  11.00000  0.05    0.35
Q8    1   0.8892  0.6448  0.4111  11.00000  0.05    0.34
Q9    1   0.7662  0.6340  0.2525  11.00000  0.05    0.34
Q10   1   0.8689  0.5912  0.4489  11.00000  0.05    0.33
Q11   1   0.5796  0.8248  0.4691  11.00000  0.05    0.33
Q12   1   0.8903  0.2387  0.4997  11.00000  0.05    0.33
Q13   1   0.8110  0.2687  0.6289  11.00000  0.05    0.32
Q14   1   0.9281  0.5078  0.3928  11.00000  0.05    0.32
Q15   1   0.8884  0.3325  0.4798  11.00000  0.05    0.32
Q16   1   0.7517  0.8515  0.4488  11.00000  0.05    0.31
Q17   1   0.6879  0.2334  0.5209  11.00000  0.05    0.31
Q18   1   0.7991  0.8642  0.4182  11.00000  0.05    0.31
Q19   1   0.8726  0.2657  0.6793  11.00000  0.05    0.31
Q20   1   0.5728  0.9004  0.5072  11.00000  0.05    0.31
;
_shelx_res_checksum                760
_shelx_hkl_file
;
   3   0   0   -1.00    2.90
   3   0   0   -6.30    3.10
  -3   0   0   -1.80    2.60
  -3   0   0    0.50    1.30
  -3   0   0    1.80    2.40
  -3   0   0   -1.40    2.40
   3   0   0   -2.00    3.20
  -3   0   0    2.60    2.70
   3   0   0    1.00    3.40
   3   0   0    2.60    3.10
  -3   0   0   -1.70    2.80
  -3   0   0   -0.60    2.70
  -4   0   0 1645.54   52.29
   4   0   0 1670.03   52.79
  -4   0   0 1671.13   52.19
  -4   0   0 1701.33   52.69
   4   0   0 1698.23   52.79
  -4   0   0 1648.34   52.39
  -4   0   0 1609.04   52.49
   4   0   0 1635.44   52.09
  -4   0   0 1671.63   50.09
   4   0   0 1568.14   52.49
  -4   0   0 1619.84   52.79
   4   0   0 1698.53   52.49
   4   0   0 1631.14   52.59
  -5   0   0    6.50    3.50
  -5   0   0   15.30    5.00
  -5   0   0   12.90    3.90
   5   0   0   -1.80    4.40
  -5   0   0   10.50    4.50
  -5   0   0    6.80    1.90
  -5   0   0    6.90    3.90
   5   0   0    1.80    4.30
   5   0   0    6.20    3.90
   5   0   0    6.30    4.20
  -5   0   0   -1.10    3.30
   5   0   0    9.10    4.40
   5   0   0   10.90    4.60
   6   0   0  518.15   21.30
  -6   0   0  501.65   17.40
  -6   0   0  561.74   21.50
  -6   0   0  523.45   20.90
   6   0   0  527.15   20.90
   6   0   0  528.95   21.40
   6   0   0  567.64   21.60
   6   0   0  531.25   21.40
  -6   0   0  525.05   21.60
   6   0   0  536.95   20.50
   7   0   0   14.90    5.70
   7   0   0   15.90    6.10
  -7   0   0   16.10    2.80
  -7   0   0   14.70    5.90
  -7   0   0   23.10    6.30
   7   0   0   23.10    5.80
  -7   0   0    7.80    6.30
   7   0   0   13.50    5.90
   7   0   0    9.60    6.10
  -7   0   0   20.80    5.60
  -7   0   0   12.50    5.80
   8   0   0 1603.24   53.09
  -8   0   0 1606.84   54.29
   8   0   0 1564.74   53.99
  -8   0   0 1555.34   53.59
   8   0   0 1577.34   54.19
  -8   0   0 1595.84   54.79
   8   0   0 1554.14   54.09
  -8   0   0 1541.25   48.80
   8   0   0 1611.14   54.39
   8   0   0 1553.54   53.59
   9   0   0   -6.60    5.00
   9   0   0   -0.80    6.80
  -9   0   0   -1.80    7.50
  -9   0   0   -0.40    2.70
  -9   0   0   -1.60    6.70
  -9   0   0    2.20    5.00
   9   0   0   -1.30    6.20
  -9   0   0   -4.60    5.20
   9   0   0    3.00    6.00
   9   0   0    2.30    7.00
   9   0   0   -5.90    7.20
   9   0   0  -13.40    6.10
  -9   0   0   -6.20    5.80
  10   0   0  746.53   30.60
  10   0   0  745.43   31.40
 -10   0   0  772.62   30.80
 -10   0   0  749.03   24.60
 -10   0   0  770.22   30.10
  10   0   0  727.33   31.40
  10   0   0  707.33   30.50
  10   0   0  770.22   30.50
  10   0   0  740.13   30.80
  10   0   0  723.33   31.30
 -10   0   0  741.83   30.40
 -10   0   0  747.63   31.50
 -10   0   0  700.93   31.70
 -11   0   0   -3.20    5.40
 -11   0   0    7.20    9.10
  11   0   0    9.50    8.40
 -11   0   0    1.60    6.30
  11   0   0   -4.00    7.30
  11   0   0    7.30    7.00
 -11   0   0    8.50    7.50
 -11   0   0   13.00    8.70
  11   0   0    1.00    8.10
  11   0   0    6.60    8.00
  11   0   0   -4.40    6.40
  11   0   0   -5.10    8.00
 -11   0   0    0.30    3.00
 -12   0   0  193.48   17.20
 -12   0   0  211.68   15.90
  12   0   0  202.18   18.70
  12   0   0  203.58   17.00
  12   0   0  220.78   16.50
  12   0   0  223.28   18.10
  12   0   0  232.68   17.50
 -12   0   0  208.08   18.10
  12   0   0  203.48   17.20
 -12   0   0  216.98   15.50
  12   0   0  219.68   16.30
 -12   0   0  221.48   15.60
 -12   0   0  222.38    9.50
  13   0   0   12.80    8.50
  13   0   0    7.30   10.50
 -13   0   0    4.60    3.20
 -13   0   0    1.00    7.40
  13   0   0    3.80    9.10
  13   0   0    2.70   11.60
 -13   0   0   -2.40    5.90
 -13   0   0   17.40    8.80
  13   0   0    4.20   10.30
  13   0   0   -0.50    9.60
  13   0   0   -3.00    8.00
 -13   0   0    7.10   10.10
 -13   0   0    1.70    9.90
  14   0   0  651.03   33.30
  14   0   0  662.03   31.20
  14   0   0  653.83   32.20
  14   0   0  678.33   33.60
 -14   0   0  571.84   30.10
 -14   0   0  659.93   21.90
 -14   0   0  636.74   32.40
 -14   0   0  661.23   22.40
 -14   0   0  674.13   31.70
  14   0   0  720.93   33.60
 -14   0   0  661.23   31.10
 -14   0   0  682.93   33.40
  15   0   0   -2.10   10.20
  15   0   0  -10.30   11.70
 -15   0   0    1.50    2.30
 -15   0   0   -7.10    8.70
 -15   0   0    1.10   12.50
 -15   0   0   -1.30    2.10
  15   0   0    3.10   10.60
  15   0   0   23.90   12.10
 -15   0   0   -1.30   10.20
  15   0   0   -8.50    9.00
 -16   0   0  327.47   25.50
  16   0   0  312.17   25.90
  16   0   0  332.87   24.30
  16   0   0  297.47   25.60
 -16   0   0  284.57   23.30
  16   0   0  323.47   25.00
  16   0   0  305.87   22.90
  17   0   0    2.50   12.00
  17   0   0    0.00   11.90
 -17   0   0   -6.60   10.90
  17   0   0  -12.60   13.50
  17   0   0   21.80   12.60
 -17   0   0   -7.10   12.60
 -18   0   0 1352.76   59.99
 -18   0   0 1493.05   61.19
  18   0   0 1429.76   61.09
  18   0   0 1437.86   59.49
  18   0   0 1443.06   61.19
  18   0   0 1437.26   57.79
  19   0   0   -5.60   14.00
  19   0   0  -13.50   13.40
  19   0   0    2.30   16.00
 -19   0   0    9.10   15.80
 -20   0   0   55.89   18.00
  20   0   0   52.59   17.30
  20   0   0   38.30   17.20
  20   0   0   70.79   19.00
  20   0   0   41.10   19.50
  21   0   0    1.60   15.50
  21   0   0   -5.90   16.30
  21   0   0   -0.20   17.50
 -21   0   0  -14.90   15.60
  21   0   0   -6.40   15.30
  22   0   0   48.80   21.20
  22   0   0   61.79   21.30
  22   0   0   17.40   18.60
  22   0   0   -6.90   16.10
 -22   0   0   12.10   18.30
  23   0   0  -24.00   17.80
  23   0   0   11.90   16.90
  23   0   0  -10.60   19.40
  23   0   0    7.20   18.90
 -23   0   0  -28.40   19.90
  24   0   0   26.70   19.80
 -24   0   0  -11.30   20.70
  24   0   0   18.60   22.00
  24   0   0   -8.50   18.60
   0   1   0    0.00    1.10
  -1  -1   0  296.37   10.30
  -1  -1   0  288.77   10.40
   1  -1   0  289.37   10.00
  -1  -1   0  296.97    9.90
   1  -1   0  301.67   10.40
   1  -1   0  300.57   11.10
  -1  -1   0  298.17   10.60
  -1  -1   0  291.57   10.50
   1  -1   0  285.57   10.50
   1  -1   0  282.17   10.40
   1  -1   0  299.47   10.00
   1   1   0  297.57   10.50
  -1   1   0  305.07   10.30
  -1   1   0  296.97   10.50
   1   1   0  309.37   10.70
   1   1   0  297.77   10.40
  -1   1   0  296.17   10.00
   1   1   0  292.17   10.50
  -1   1   0  299.67   11.10
   1   1   0  306.97   10.40
   1   1   0  310.17   10.00
  -1   1   0  305.87   10.50
   1   1   0  304.57   10.40
   2  -1   0   20.30    3.30
  -2  -1   0   28.50    3.00
   2  -1   0   26.60    3.30
   2  -1   0   29.00    3.10
   2  -1   0   24.20    3.30
   2  -1   0   28.20    2.30
   2  -1   0   27.70    3.30
  -2  -1   0   30.70    3.00
  -2  -1   0   31.80    3.70
  -2  -1   0   25.10    3.40
  -2  -1   0   36.60    3.80
   2  -1   0   24.70    2.20
  -2  -1   0   26.60    3.30
  -2   1   0   25.30    2.30
   2   1   0   29.50    3.10
   2   1   0   31.60    3.50
  -2   1   0   37.40    3.40
  -2   1   0   26.30    2.30
   2   1   0   21.50    3.20
   2   1   0   31.50    2.90
   2   1   0   30.50    3.20
   2   1   0   33.70    3.70
  -2   1   0   35.10    3.70
  -2   1   0   26.60    3.20
  -2   1   0   25.00    3.00
   3  -1   0  109.89    4.50
   3  -1   0  118.69    5.70
  -3  -1   0  119.09    5.80
   3  -1   0  111.09    7.10
  -3  -1   0  122.59    6.40
  -3  -1   0  100.49    6.90
  -3  -1   0  116.39    6.60
   3  -1   0  124.39    7.00
   3  -1   0   86.89    7.50
  -3  -1   0  109.69    6.40
   3  -1   0  115.49    7.00
  -3  -1   0  116.99    6.90
  -3  -1   0  112.79    6.50
  -3   1   0  109.29    6.80
   3   1   0  119.89    6.70
   3   1   0  119.79    7.00
  -3   1   0  111.19    6.20
  -3   1   0  115.69    6.60
  -3   1   0  124.09    5.70
  -3   1   0  108.09    4.60
  -3   1   0  111.79    6.60
   3   1   0  123.59    7.20
  -3   1   0  104.59    6.80
   3   1   0  111.19    6.40
   3   1   0  114.89    5.70
  -4  -1   0 2006.50   62.89
  -4  -1   0 1990.00   63.19
   4  -1   0 1981.50   63.09
  -4  -1   0 1968.50   61.59
  -4  -1   0 1987.80   63.09
  -4  -1   0 1992.40   63.09
   4  -1   0 2138.69   62.09
  -4  -1   0 1980.70   63.09
   4  -1   0 2000.70   63.19
  -4  -1   0 1952.70   63.29
   4  -1   0 2029.30   63.19
   4  -1   0 2042.40   63.09
  -4   1   0 1969.60   63.09
  -4   1   0 2019.00   63.29
  -4   1   0 1949.10   60.29
   4   1   0 2023.70   63.09
   4   1   0 1993.00   63.09
   4   1   0 2013.50   63.29
   4   1   0 2032.30   63.19
   4   1   0 1963.20   61.49
   4   1   0 1999.40   62.99
  -4   1   0 2025.00   63.19
   4   1   0 1957.00   63.29
  -4   1   0 2062.39   63.59
  -4   1   0 2000.30   62.99
  -4   1   0 1952.20   61.79
  -5  -1   0 5380.76  169.48
  -5  -1   0 5614.04  171.58
  -5  -1   0 5503.65  169.78
   5  -1   0 5578.74  169.58
   5  -1   0 5612.14  169.58
   5  -1   0 5630.24  169.68
  -5  -1   0 5528.45  169.38
  -5   1   0 5605.14  169.48
   5   1   0 5502.65  169.58
  -5   1   0 5636.94  168.28
  -5   1   0 5559.84  169.58
   5   1   0 5651.83  169.68
  -5   1   0 5552.34  169.38
  -5   1   0 5567.44  165.98
  -5   1   0 5490.85  169.88
   5   1   0 5544.95  169.38
   5   1   0 5606.44  169.78
  -6  -1   0   53.39    7.40
   6  -1   0   67.99    8.20
  -6  -1   0   61.89    6.70
  -6  -1   0   57.59    5.10
  -6  -1   0   51.99    6.50
  -6  -1   0   56.09    6.80
  -6  -1   0   63.19    8.20
   6  -1   0   70.19    8.20
   6  -1   0   77.09    8.00
   6  -1   0   66.69    6.50
   6  -1   0   61.29    7.70
   6   1   0   48.00    7.40
   6   1   0   61.49    8.00
   6   1   0   61.19    7.10
   6   1   0   62.09    7.90
   6   1   0   53.09    7.10
  -6   1   0   67.49    7.60
  -6   1   0   57.99    7.40
  -6   1   0   61.99    6.50
  -6   1   0   52.69    6.80
   6   1   0   60.49    5.10
   6   1   0   73.89    8.10
  -6   1   0   73.09    8.40
  -6   1   0   51.69    3.30
   6   1   0   57.59    6.70
  -6   1   0   57.49    6.40
   7  -1   0  348.67   16.50
   7  -1   0  380.36   16.10
   7  -1   0  378.16   17.30
  -7  -1   0  371.96   17.40
  -7  -1   0  366.76   17.60
  -7  -1   0  362.26   17.50
  -7  -1   0  323.07   13.60
   7  -1   0  354.96   16.60
   7  -1   0  344.77   18.80
  -7   1   0  345.27   17.80
  -7   1   0  340.97   11.80
   7   1   0  342.87   16.80
  -7   1   0  347.17   17.30
  -7   1   0  383.26   15.70
  -7   1   0  365.86   16.90
   7   1   0  371.56   17.50
   7   1   0  335.87   16.20
   7   1   0  357.36   16.70
   7   1   0  341.07   16.60
   7   1   0  380.26   17.60
  -7   1   0  336.77   16.20
  -8  -1   0  146.39   11.90
   8  -1   0  113.99   11.20
  -8  -1   0  114.19   16.60
   8  -1   0  127.89   12.00
   8  -1   0  115.29   11.90
  -8  -1   0  129.39    9.90
  -8  -1   0  113.49   11.80
   8  -1   0  144.59   12.60
   8  -1   0  121.89   11.90
  -8  -1   0  117.69    7.60
   8  -1   0  131.09   10.20
  -8  -1   0  141.79   12.50
   8   1   0  121.99   11.90
  -8   1   0  119.79   12.20
   8   1   0  109.79   11.10
  -8   1   0  125.69    5.50
  -8   1   0  122.29    5.40
   8   1   0  140.09   12.40
   8   1   0  139.79   11.70
   8   1   0  134.89   11.80
   8   1   0  121.49   10.90
  -8   1   0  116.39   11.60
  -8   1   0  130.19   11.10
   8   1   0  136.59   12.30
  -8   1   0  113.69    9.80
  -9  -1   0 1994.00   62.99
  -9  -1   0 2041.90   67.99
   9  -1   0 2058.19   67.99
  -9  -1   0 1965.80   67.19
  -9  -1   0 1972.10   68.09
   9  -1   0 2033.70   67.79
   9  -1   0 2046.00   66.19
   9  -1   0 1993.60   67.89
  -9  -1   0 1945.61   67.89
   9  -1   0 2008.60   67.99
   9  -1   0 1926.01   67.69
  -9  -1   0 2085.09   67.69
  -9   1   0 2001.50   67.39
   9   1   0 2011.10   67.19
  -9   1   0 2094.19   67.79
   9   1   0 1995.00   67.99
  -9   1   0 1958.00   60.79
  -9   1   0 2031.20   68.79
  -9   1   0 2059.89   66.59
   9   1   0 1938.91   67.49
  -9   1   0 1928.81   66.99
   9   1   0 2081.19   67.49
   9   1   0 2016.30   68.19
  -9   1   0 1992.60   67.99
   9   1   0 1999.10   67.29
  -9   1   0 1971.40   60.89
   9   1   0 2067.19   68.09
  10  -1   0   99.09   10.40
  10  -1   0   92.09   12.00
 -10  -1   0  115.39   12.30
 -10  -1   0  105.99    7.60
 -10  -1   0  103.69   11.60
 -10  -1   0  109.29   12.40
  10  -1   0  103.29   12.30
 -10  -1   0  110.79   12.00
  10  -1   0  102.49   11.40
 -10  -1   0  119.79   13.20
  10  -1   0  115.49   11.90
  10  -1   0   74.59   10.90
  10   1   0  116.19   12.90
 -10   1   0   99.49   12.40
 -10   1   0   86.29   11.40
  10   1   0   78.39   11.90
  10   1   0   81.69   10.90
 -10   1   0  102.89   10.80
  10   1   0  116.69   12.00
  10   1   0  120.59   12.50
 -10   1   0  114.49   11.90
 -10   1   0   92.29   12.80
 -10   1   0   96.89    4.80
 -10   1   0  100.19    4.80
  10   1   0  112.89   12.10
 -10   1   0   82.79   10.70
  10   1   0  124.59   12.10
 -11  -1   0  238.08   11.40
  11  -1   0  243.78   17.30
 -11  -1   0  221.68   17.70
  11  -1   0  211.68   16.60
  11  -1   0  220.58   17.20
 -11  -1   0  231.18   16.00
 -11  -1   0  234.78   16.10
 -11  -1   0  234.38   15.40
 -11  -1   0  225.08   17.20
  11  -1   0  215.88   17.30
  11  -1   0  217.38   15.00
  11  -1   0  223.88   16.80
  11   1   0  245.28   15.50
  11   1   0  234.18   17.20
 -11   1   0  236.78   15.70
 -11   1   0  235.58   17.10
  11   1   0  226.68   16.60
 -11   1   0  213.18   15.60
  11   1   0  226.78   17.60
 -11   1   0  233.98    8.30
 -11   1   0  239.28    8.30
  11   1   0  229.78   17.10
 -11   1   0  227.98   15.50
  11   1   0  242.88   16.70
 -11   1   0  215.38   16.20
  11   1   0  241.58   17.10
 -12  -1   0  206.18   17.70
 -12  -1   0  193.88   17.40
  12  -1   0  188.98   15.90
 -12  -1   0  190.38   15.20
  12  -1   0  205.38   15.30
 -12  -1   0  199.68   18.70
  12  -1   0  192.18   16.50
  12  -1   0  196.28   18.00
  12  -1   0  216.48   15.90
 -12  -1   0  178.88   16.30
 -12  -1   0  198.28   10.50
  12  -1   0  184.68   17.00
  12   1   0  206.58   16.80
 -12   1   0  201.78    6.70
 -12   1   0  185.38   16.30
 -12   1   0  172.58   17.20
  12   1   0  224.58   17.00
  12   1   0  185.98   17.90
 -12   1   0  178.98   15.10
 -12   1   0  193.18    6.60
 -12   1   0  204.48   14.70
  12   1   0  223.48   16.60
 -12   1   0  198.68   16.20
  12   1   0  188.88   16.10
  12   1   0  177.28   15.00
  12   1   0  179.18   17.10
 -13  -1   0  113.69   16.00
 -13  -1   0  102.39   14.50
  13  -1   0  133.99   16.40
 -13  -1   0  143.29   14.80
  13  -1   0  101.49   13.10
  13  -1   0  105.99   12.90
  13  -1   0  141.39   16.60
 -13  -1   0  113.49   15.60
 -13  -1   0  118.29    8.60
 -13  -1   0  112.69   13.90
  13  -1   0  133.29   15.40
  13  -1   0  118.79   15.70
  13   1   0  104.49   13.60
 -13   1   0  122.89   17.40
 -13   1   0  140.39   14.50
 -13   1   0  137.59   14.20
 -13   1   0  135.99   15.90
  13   1   0  118.19   15.40
  13   1   0  113.09   15.00
  13   1   0  112.99   14.40
  13   1   0   85.29   16.90
  13   1   0  129.69   14.70
  13   1   0  140.19   15.40
 -13   1   0  121.39   14.30
 -14  -1   0    8.20   10.90
  14  -1   0   25.30   10.20
  14  -1   0   15.00    9.40
  14  -1   0   38.30   12.60
  14  -1   0   34.20   11.70
 -14  -1   0   18.60    5.00
 -14  -1   0   37.40    9.70
 -14  -1   0   27.60   10.20
 -14  -1   0   27.00   11.30
 -14  -1   0   33.50   12.60
  14  -1   0   30.50   11.40
 -14   1   0   38.40   10.10
 -14   1   0   14.50   12.90
 -14   1   0   16.10    9.30
  14   1   0   28.20   10.90
 -14   1   0   28.50   10.90
  14   1   0   28.20   13.40
  14   1   0   38.60   12.70
 -14   1   0   17.00   12.20
  14   1   0   21.80   10.40
  14   1   0   26.10   11.40
  15  -1   0   15.40   10.40
  15  -1   0    2.20   11.70
 -15  -1   0    4.80    4.50
  15  -1   0   10.50   11.10
  15  -1   0   11.60   12.80
 -15  -1   0   17.00   12.70
  15  -1   0   16.20   10.00
 -15  -1   0   22.90   10.80
  15   1   0   18.70   10.40
  15   1   0   -1.80   11.60
  15   1   0    2.40   10.90
 -15   1   0   17.50   11.80
 -15   1   0   -0.60    8.60
  15   1   0   16.90   11.80
 -15   1   0    1.80   13.00
 -15   1   0   13.80   12.30
  15   1   0   28.20   11.00
  16  -1   0  189.78   20.10
 -16  -1   0  159.88    9.60
  16  -1   0  169.68   18.30
  16  -1   0  211.68   20.90
 -16  -1   0  184.68   20.40
  16  -1   0  188.08   22.20
 -16  -1   0  230.98   22.60
  16  -1   0  181.08   20.30
  16   1   0  175.38   20.00
  16   1   0  173.88   20.50
 -16   1   0  178.18   20.50
  16   1   0  181.98   20.40
  16   1   0  189.08   20.10
 -16   1   0  156.68   19.20
  16   1   0  206.28   22.40
  17  -1   0   -6.30   13.20
  17  -1   0   10.70   11.70
 -17  -1   0    8.40   14.70
 -17  -1   0    8.30   12.60
  17  -1   0    5.00   13.20
 -17  -1   0    3.90    3.90
  17  -1   0   19.30   14.90
 -17   1   0    2.40   12.90
  17   1   0    9.50   13.40
  17   1   0  -27.60   12.70
  17   1   0   -5.90   11.60
  17   1   0    1.00   11.80
  18  -1   0   37.50   17.50
 -18  -1   0   16.50    2.40
 -18  -1   0   21.00    2.70
 -18  -1   0   10.10   15.50
 -18  -1   0   26.50   15.80
  18  -1   0   34.60   16.20
  18  -1   0   -3.00   13.40
  18  -1   0    3.70   12.80
  18   1   0   -6.50   14.40
 -18   1   0   11.90   15.40
  18   1   0   30.10   14.60
  18   1   0   25.70   16.10
  18   1   0   15.60   13.90
  19  -1   0  125.79   19.30
  19  -1   0  146.09   21.60
  19  -1   0  173.68   21.70
 -19  -1   0  182.18   24.20
 -19  -1   0  160.58   29.30
  19   1   0  108.69   19.80
  19   1   0  130.09   19.30
  19   1   0  172.58   23.00
 -19   1   0   93.89   20.50
  20  -1   0   12.10   13.50
  20  -1   0   38.60   16.70
  20  -1   0   22.50   15.70
  20  -1   0   28.30   18.10
 -20  -1   0   -0.90   15.60
  20   1   0    4.20   16.50
  20   1   0   24.30   17.50
  20   1   0   20.90   16.10
  20   1   0   29.30   16.60
 -20   1   0   27.60   17.50
  21  -1   0   84.69   22.40
  21  -1   0   85.59   19.90
  21  -1   0   70.89   21.90
 -21  -1   0   78.29   21.20
  21  -1   0  135.79   22.20
 -21   1   0   95.39   22.00
  21   1   0  105.69   22.50
  21   1   0  101.09   22.50
  21   1   0   51.99   18.90
  21   1   0   78.49   20.80
  22  -1   0   24.30   19.40
  22  -1   0   32.20   17.80
 -22  -1   0   57.09   20.70
  22  -1   0   55.39   19.30
  22  -1   0   40.80   20.20
  22   1   0   21.00   18.30
  22   1   0   43.10   21.30
 -22   1   0   57.69   20.70
  22   1   0   28.60   20.60
  22   1   0   53.99   19.20
  23  -1   0  211.68   29.20
  23  -1   0  245.38   30.90
  23  -1   0  186.88   28.10
  23  -1   0  237.78   25.70
 -23  -1   0  212.98   29.70
  23   1   0  223.68   28.00
 -23   1   0  180.18   32.10
  23   1   0  201.68   29.00
  23   1   0  239.58   28.30
  23   1   0  174.08   28.90
  24  -1   0   22.30   17.90
 -24  -1   0   -3.90   20.70
  24  -1   0  -30.80   18.80
  24  -1   0  -22.70   19.60
  24   1   0   -9.20   18.20
 -24   1   0    5.50   20.30
  24   1   0    0.30   20.70
  24   1   0   25.80   20.20
   0  -2   0   29.40    3.60
   0  -2   0   21.10    4.60
   0  -2   0   32.40    3.00
   0  -2   0   27.20    3.00
   0  -2   0   34.50    4.10
   0  -2   0   25.10    3.40
   0  -2   0   29.50    5.40
   0   2   0   32.70    3.20
   0   2   0   27.20    4.00
   0   2   0   35.40    4.80
   0   2   0   20.20    4.30
   0   2   0   25.40    3.50
   0   2   0   23.70    2.80
   0   2   0   36.40    4.80
  -1  -2   0  121.29    6.50
  -1  -2   0  115.19    8.30
  -1  -2   0  128.29    7.50
  -1  -2   0  112.39    6.80
   1  -2   0  136.29    6.70
   1  -2   0  115.79    6.30
  -1  -2   0  111.79    6.30
   1  -2   0  135.29    7.00
  -1  -2   0  128.39    5.70
   1  -2   0  123.39    7.10
   1  -2   0  126.39    6.20
   1  -2   0  129.19    6.80
   1   2   0  123.19    6.60
  -1   2   0  121.19    5.30
  -1   2   0  108.39    7.70
   1   2   0  126.19    7.00
  -1   2   0  126.29    6.10
   1   2   0  118.69    6.90
   1   2   0  124.29    5.60
  -1   2   0  125.09    6.50
   1   2   0  133.89    6.60
  -1   2   0  116.89    6.40
   1   2   0  129.59    7.20
   1   2   0  132.09    6.80
  -1   2   0  119.09    6.90
   1   2   0  125.19    7.20
  -2  -2   0  804.72   26.40
  -2  -2   0  784.62   26.90
   2  -2   0  798.12   26.60
  -2  -2   0  769.12   26.50
  -2  -2   0  766.92   26.50
   2  -2   0  770.92   26.60
  -2  -2   0  793.02   25.40
   2  -2   0  765.22   27.70
  -2  -2   0  795.72   26.40
   2  -2   0  784.02   26.60
   2  -2   0  797.02   25.60
  -2  -2   0  818.02   26.60
   2   2   0  757.92   26.40
  -2   2   0  750.92   27.50
  -2   2   0  779.22   26.50
   2   2   0  779.52   26.90
   2   2   0  796.52   25.50
   2   2   0  794.62   27.10
   2   2   0  795.92   26.40
   2   2   0  768.52   26.50
  -2   2   0  801.22   25.70
  -2   2   0  785.02   25.60
   2   2   0  763.52   26.70
  -2   2   0  790.22   26.50
   2   2   0  778.42   26.30
  -3  -2   0  177.48   10.00
  -3  -2   0  191.98    8.80
   3  -2   0  175.78    9.10
   3  -2   0  188.88    9.50
   3  -2   0  189.88    9.50
   3  -2   0  171.68    8.50
  -3  -2   0  178.98    8.90
   3  -2   0  184.78    9.80
  -3  -2   0  180.58    9.60
   3  -2   0  172.28    9.50
  -3  -2   0  163.48    9.00
  -3  -2   0  182.18    9.80
   3  -2   0  185.08    7.80
  -3   2   0  174.48    9.60
   3   2   0  192.48    8.70
  -3   2   0  172.68    9.30
   3   2   0  193.18    9.40
   3   2   0  192.38   10.10
  -3   2   0  174.68    7.30
   3   2   0  181.78    9.90
   3   2   0  182.98    9.00
  -3   2   0  190.88    9.90
  -3   2   0  186.28    7.90
  -3   2   0  164.18    8.70
   3   2   0  193.88    9.90
   4  -2   0 1423.46   48.10
   4  -2   0 1463.05   48.60
   4  -2   0 1472.35   46.20
  -4  -2   0 1441.56   47.30
  -4  -2   0 1473.55   48.40
   4  -2   0 1500.75   48.40
   4  -2   0 1510.75   47.50
   4  -2   0 1533.35   48.50
  -4  -2   0 1466.05   48.80
   4  -2   0 1429.96   45.80
  -4  -2   0 1481.15   48.40
  -4  -2   0 1496.25   48.60
   4  -2   0 1538.55   48.70
  -4  -2   0 1491.25   47.70
   4   2   0 1486.85   47.70
  -4   2   0 1473.35   48.30
   4   2   0 1516.55   48.60
   4   2   0 1540.55   47.60
   4   2   0 1473.65   48.60
  -4   2   0 1474.95   48.50
   4   2   0 1452.15   48.50
  -4   2   0 1438.36   45.90
  -4   2   0 1485.45   46.20
  -4   2   0 1493.95   48.50
   4   2   0 1535.85   49.00
  -4   2   0 1452.65   48.10
  -5  -2   0  499.35   21.20
  -5  -2   0  565.44   21.40
  -5  -2   0  548.55   19.80
  -5  -2   0  513.45   21.20
   5  -2   0  539.55   19.00
   5  -2   0  564.64   21.00
  -5  -2   0  552.54   21.30
  -5  -2   0  538.45   20.60
   5  -2   0  518.45   21.20
   5  -2   0  514.55   17.70
   5  -2   0  533.05   21.10
  -5  -2   0  503.75   21.10
   5  -2   0  556.34   21.50
   5  -2   0  526.85   21.20
   5   2   0  521.75   21.40
   5   2   0  538.45   21.30
  -5   2   0  531.25   21.00
  -5   2   0  539.15   17.90
   5   2   0  538.95   20.90
   5   2   0  541.05   20.60
  -5   2   0  569.14   21.60
  -5   2   0  521.05   20.70
   5   2   0  544.05   19.70
   5   2   0  547.15   21.60
  -5   2   0  518.35   18.80
   6  -2   0  143.49    6.20
   6  -2   0  140.39   10.80
   6  -2   0  153.48   10.90
  -6  -2   0  128.09    9.70
   6  -2   0  125.29   10.10
  -6  -2   0  164.68   10.50
  -6  -2   0  130.19    8.10
  -6  -2   0  142.19    9.80
   6  -2   0  135.49    8.40
  -6  -2   0  136.49    9.40
  -6  -2   0  136.99   10.70
   6  -2   0  126.69   10.20
  -6   2   0  143.79    9.90
  -6   2   0  136.69    8.30
  -6   2   0  129.79   10.60
   6   2   0  144.29   10.60
   6   2   0  161.48   11.10
   6   2   0  141.69   10.00
  -6   2   0  132.49    6.20
  -6   2   0  125.99    9.00
   6   2   0  148.19    8.70
  -6   2   0  133.39   10.20
  -6   2   0  128.19    9.10
   6   2   0  141.89    9.50
  -7  -2   0  850.21   32.20
   7  -2   0  845.92   32.10
  -7  -2   0  842.22   32.50
   7  -2   0  856.01   32.30
   7  -2   0  849.61   32.40
  -7  -2   0  834.52   32.60
   7  -2   0  893.11   30.20
   7  -2   0  849.52   32.80
  -7  -2   0  870.61   30.10
  -7  -2   0  869.41   33.00
   7  -2   0  890.81   32.90
   7   2   0  824.42   32.10
   7   2   0  859.51   32.20
   7   2   0  884.71   33.10
   7   2   0  890.91   30.00
   7   2   0  861.71   32.50
   7   2   0  846.92   32.40
  -7   2   0  887.41   32.90
  -7   2   0  805.32   32.10
   7   2   0  872.81   32.40
  -7   2   0  873.21   33.20
  -7   2   0  892.91   27.40
  -7   2   0  857.61   30.10
  -7   2   0  898.41   32.60
  -8  -2   0    4.70    6.10
  -8  -2   0   22.00    6.20
   8  -2   0   15.50    7.70
   8  -2   0   31.30    8.50
  -8  -2   0    5.40    7.50
   8  -2   0   20.50    6.80
  -8  -2   0   17.40    7.40
   8  -2   0    5.30    6.40
  -8  -2   0   19.50    5.20
   8  -2   0   14.20    5.50
  -8  -2   0    6.00    7.00
  -8   2   0   12.50    7.10
  -8   2   0    7.40    6.20
   8   2   0   10.60    6.80
  -8   2   0   16.50    2.70
  -8   2   0   16.70    7.50
   8   2   0   20.00    7.30
   8   2   0   14.20    7.60
  -8   2   0   13.40    7.60
   8   2   0   15.50    6.40
   8   2   0   24.40    6.60
  -8   2   0    7.90    6.50
  -8   2   0   22.60    6.00
   8   2   0   15.70    5.00
   8   2   0   21.50    8.10
  -9  -2   0   47.10    9.00
   9  -2   0   43.80    9.40
  -9  -2   0   83.29   10.70
   9  -2   0   44.30    9.80
   9  -2   0   61.09   10.00
  -9  -2   0   32.00    8.90
  -9  -2   0   58.09    9.40
   9  -2   0   49.00    8.40
   9  -2   0   65.39    8.20
  -9  -2   0   39.20    9.40
   9   2   0   63.89    9.40
  -9   2   0   48.40    3.60
  -9   2   0   48.10    9.30
   9   2   0   43.00    9.40
  -9   2   0   46.00    8.70
   9   2   0   46.80    9.40
   9   2   0   47.20    9.40
   9   2   0   66.89    9.80
   9   2   0   48.80    6.40
   9   2   0   58.79    9.90
   9   2   0   50.09    9.70
  -9   2   0   51.49   10.10
  -9   2   0   39.80    8.20
  -9   2   0   54.79    9.10
  10  -2   0  473.55   24.20
 -10  -2   0  507.15   23.90
  10  -2   0  471.85   23.40
  10  -2   0  489.45   23.50
  10  -2   0  486.05   21.50
 -10  -2   0  514.65   24.80
 -10  -2   0  466.05   22.80
 -10  -2   0  497.95   23.20
 -10  -2   0  499.95   23.90
 -10  -2   0  502.25   19.90
  10  -2   0  471.55   24.10
  10   2   0  444.96   22.80
  10   2   0  478.35   23.70
 -10   2   0  465.25   23.60
  10   2   0  489.95   24.00
 -10   2   0  459.45   21.30
 -10   2   0  471.55   15.30
  10   2   0  522.25   24.70
  10   2   0  444.36   23.80
 -10   2   0  473.55   22.90
 -10   2   0  489.35   15.40
  10   2   0  462.85   24.00
 -10   2   0  524.05   24.50
  10   2   0  525.95   24.10
 -10   2   0  523.85   23.70
 -10   2   0  468.25   23.40
 -11  -2   0  618.94   29.20
  11  -2   0  590.14   28.70
 -11  -2   0  579.84   28.40
  11  -2   0  632.94   27.90
 -11  -2   0  623.94   27.70
 -11  -2   0  577.54   27.20
 -11  -2   0  583.74   23.30
  11  -2   0  647.64   29.20
  11  -2   0  575.04   25.30
  11  -2   0  591.84   28.50
  11   2   0  593.54   27.90
  11   2   0  643.54   29.20
  11   2   0  609.24   28.80
  11   2   0  644.84   29.20
 -11   2   0  544.35   27.40
 -11   2   0  590.94   25.70
 -11   2   0  625.34   29.80
  11   2   0  592.64   27.20
  11   2   0  612.74   28.10
 -11   2   0  584.64   27.10
 -11   2   0  631.54   28.00
 -11   2   0  633.84   28.70
  11   2   0  610.34   27.70
  12  -2   0   26.60   10.50
  12  -2   0   15.00    8.70
 -12  -2   0   21.00    8.00
 -12  -2   0   15.00   10.30
  12  -2   0   42.30    8.90
 -12  -2   0   33.10    6.30
 -12  -2   0   17.80    7.80
 -12  -2   0   27.50    9.10
 -12  -2   0   17.60    8.70
  12  -2   0   25.10   11.00
  12   2   0   32.50   10.20
 -12   2   0   21.20    9.00
 -12   2   0   28.40    8.00
  12   2   0   30.70   11.00
  12   2   0   34.30   10.40
 -12   2   0   28.70   11.40
  12   2   0   30.20    8.50
  12   2   0   30.50   11.00
 -12   2   0   29.60    9.10
 -12   2   0   26.30    9.20
  12   2   0   12.10    8.80
  12   2   0   22.80   10.30
 -12   2   0   24.30    8.80
  13  -2   0    9.70   10.90
 -13  -2   0   -7.00    8.80
  13  -2   0    5.70    9.70
  13  -2   0   -2.10    9.50
 -13  -2   0    8.40    9.60
 -13  -2   0   -1.10   10.80
  13  -2   0    7.20    8.10
 -13  -2   0   -4.20    7.80
 -13  -2   0    2.20    5.20
  13  -2   0   17.70    9.50
 -13  -2   0   12.40   10.00
  13   2   0   -0.90    8.90
 -13   2   0    5.10    9.30
  13   2   0    2.10    9.50
 -13   2   0   -0.80    8.20
 -13   2   0    9.60   10.50
  13   2   0   18.30   10.50
  13   2   0    5.10   10.30
 -13   2   0   16.10    9.00
  13   2   0   21.10   10.40
 -13   2   0    4.80    7.80
  13   2   0    3.10   10.80
 -14  -2   0   98.09   15.30
 -14  -2   0  104.09   13.00
  14  -2   0   87.69   16.50
  14  -2   0  123.69   15.80
  14  -2   0  108.99   16.50
  14  -2   0   90.69   14.30
 -14  -2   0  115.49   16.50
 -14  -2   0  144.89   16.10
 -14  -2   0  144.49   17.70
  14  -2   0  100.79   15.20
 -14   2   0  123.39   15.30
 -14   2   0  102.59   13.70
  14   2   0   98.69   15.00
  14   2   0  112.69   15.00
 -14   2   0  106.19   14.60
 -14   2   0   84.49   15.60
  14   2   0  121.29   16.10
  14   2   0  111.69   15.10
  15  -2   0   42.60   14.10
  15  -2   0   14.80   12.70
  15  -2   0   19.10   10.60
 -15  -2   0   -1.50   12.00
  15  -2   0   20.80   10.20
 -15  -2   0    5.10    6.40
 -15  -2   0    7.40    9.70
  15  -2   0   -2.10   12.80
 -15   2   0   18.00   12.50
  15   2   0   23.40   12.70
 -15   2   0   12.50    9.60
  15   2   0    9.00   12.10
  15   2   0   22.00   13.10
  15   2   0   37.70   12.10
  15   2   0   23.50   11.40
 -16  -2   0   45.20    8.40
  16  -2   0   49.20   13.60
  16  -2   0   63.09   12.90
 -16  -2   0   65.59   16.30
  16  -2   0   50.59   16.10
  16  -2   0   47.90   14.10
  16  -2   0   35.50   15.30
 -16  -2   0   30.60   14.20
  16   2   0   37.60   14.20
  16   2   0   65.79   15.30
 -16   2   0   48.00   15.40
  16   2   0   56.19   15.10
  16   2   0   57.09   14.30
  16   2   0   42.10   15.40
 -16   2   0   51.69   13.10
  17  -2   0  399.16   29.90
  17  -2   0  379.86   28.30
 -17  -2   0  406.46   18.00
  17  -2   0  378.16   25.80
 -17  -2   0  364.76   29.00
 -17  -2   0  404.76   30.50
  17  -2   0  423.26   29.80
  17   2   0  419.16   29.80
 -17   2   0  370.76   28.50
  17   2   0  415.96   27.80
  17   2   0  441.66   28.40
  17   2   0  337.97   28.70
  18  -2   0  570.44   32.50
 -18  -2   0  556.04   35.50
 -18  -2   0  632.44   37.80
  18  -2   0  608.64   35.90
  18  -2   0  582.14   36.80
  18  -2   0  635.54   34.60
 -18   2   0  621.04   37.00
  18   2   0  606.04   36.80
  18   2   0  580.34   35.40
  18   2   0  547.35   34.50
  18   2   0  565.44   35.60
 -19  -2   0    3.60    6.30
 -19  -2   0    8.30   25.80
  19  -2   0    6.30   15.50
  19  -2   0    7.80   15.50
  19  -2   0    2.40   13.20
 -19  -2   0   18.90   16.40
  19  -2   0  -14.30   14.20
  19   2   0   -5.20   15.50
  19   2   0   -1.70   15.30
 -19   2   0    8.20   15.20
  19   2   0   -2.70   14.20
  19   2   0    5.10   14.60
  20  -2   0    0.80   14.10
 -20  -2   0  -15.90   14.20
  20  -2   0  -20.80   14.30
 -20  -2   0   20.70   17.30
 -20  -2   0    0.20    3.20
  20  -2   0  -12.20   17.30
  20  -2   0   10.60   25.10
  20   2   0   14.30   15.80
  20   2   0   14.90   16.10
  20   2   0   -5.80   12.00
 -20   2   0  -41.60   12.90
  20   2   0   -9.40   15.50
  21  -2   0   21.00   14.80
 -21  -2   0   10.00   18.30
  21  -2   0   46.90   16.90
  21  -2   0   25.40   18.60
  21  -2   0   11.20   16.80
  21   2   0   42.10   18.10
  21   2   0   47.80   20.30
  21   2   0    7.20   16.40
 -21   2   0   48.10   19.60
  21   2   0   25.10   19.00
  22  -2   0   75.69   20.90
  22  -2   0  111.09   20.70
  22  -2   0  101.19   22.60
 -22  -2   0   59.99   21.80
  22  -2   0   58.49   21.00
  22   2   0  112.09   23.90
  22   2   0  111.69   22.60
  22   2   0   19.60   19.80
 -22   2   0   85.29   22.70
  22   2   0   57.49   20.40
  23  -2   0   23.80   20.40
  23  -2   0   34.30   21.60
 -23  -2   0   35.20   20.90
  23  -2   0   12.30   18.80
  23  -2   0   24.10   17.60
  23   2   0  -23.50   16.10
  23   2   0   36.90   20.30
  23   2   0   41.60   22.30
  23   2   0   20.80   18.40
 -23   2   0   59.29   21.20
  24  -2   0   12.10   17.40
  24  -2   0   10.70   22.00
 -24  -2   0   31.20   21.50
  24  -2   0    9.60   20.60
  24   2   0   -1.50   19.80
  24   2   0  -15.90   19.00
  24   2   0   16.20   22.50
 -24   2   0    6.50   18.90
   0  -3   0    0.80    3.30
   0  -3   0    0.50    3.90
   0  -3   0   -2.40    3.80
   0  -3   0    1.30    2.80
   0  -3   0    0.00    2.70
   0  -3   0   -0.70    2.90
   0  -3   0    2.00    4.50
   0  -3   0    1.40    3.20
   0   3   0    6.80    3.70
   0   3   0    1.10    3.10
   0   3   0    6.00    4.50
   0   3   0   -2.70    2.90
   0   3   0    1.60    3.10
   0   3   0    2.60    4.40
   1  -3   0 3876.41  119.59
   1  -3   0 3935.31  120.09
  -1  -3   0 3913.71  119.19
   1  -3   0 3812.22  119.89
   1  -3   0 3956.40  120.39
  -1  -3   0 3934.81  120.19
  -1  -3   0 3808.22  120.39
   1  -3   0 3904.41  117.99
  -1  -3   0 3923.61  119.99
  -1  -3   0 3874.51  120.39
   1  -3   0 3927.11  120.29
  -1   3   0 3999.40  120.19
   1   3   0 3968.90  119.19
   1   3   0 3853.11  119.79
  -1   3   0 3915.81  119.99
  -1   3   0 3913.91  118.09
   1   3   0 3973.80  120.29
  -1   3   0 3863.51  120.09
  -1   3   0 3878.01  118.89
   1   3   0 3970.70  118.19
   1   3   0 3914.41  119.99
  -1   3   0 3942.21  119.69
   1   3   0 3840.12  119.29
   1   3   0 3929.01  120.39
  -2  -3   0  386.36   15.30
  -2  -3   0  399.56   16.00
   2  -3   0  379.26   15.80
  -2  -3   0  356.26   15.00
   2  -3   0  397.06   16.10
  -2  -3   0  365.16   15.50
  -2  -3   0  362.06   15.50
   2  -3   0  357.66   14.60
   2  -3   0  354.56   15.30
   2  -3   0  388.16   14.60
  -2  -3   0  356.16   15.80
   2  -3   0  376.86   16.20
  -2  -3   0  379.56   15.80
  -2   3   0  389.76   15.40
  -2   3   0  369.06   15.90
   2   3   0  364.36   15.90
   2   3   0  390.66   16.20
   2   3   0  368.96   16.00
  -2   3   0  389.16   14.60
  -2   3   0  362.86   15.20
   2   3   0  368.66   15.20
  -2   3   0  368.26   14.80
   2   3   0  375.76   15.40
  -2   3   0  372.96   13.10
   2   3   0  369.36   13.80
   2   3   0  401.36   15.70
   2   3   0  359.96   15.20
  -3  -3   0 7844.42  237.68
  -4  -3   0   35.40    6.90
  -4  -3   0   37.50    6.60
   4  -3   0   36.90    6.70
   4  -3   0   42.20    5.60
  -4  -3   0   40.20    6.70
  -4  -3   0   43.40    6.60
   4  -3   0   38.30    6.80
   4  -3   0   33.60    4.50
   4  -3   0   35.20    6.30
   4  -3   0   24.40    5.40
  -4  -3   0   26.80    5.10
   4  -3   0   37.00    6.30
  -4  -3   0   35.20    6.30
   4   3   0   35.70    5.20
  -4   3   0   32.50    6.40
   4   3   0   32.30    5.70
  -4   3   0   39.90    5.60
   4   3   0   39.80    5.90
  -4   3   0   41.70    6.00
   4   3   0   29.50    5.50
  -4   3   0   37.60    5.40
   4   3   0   39.40    6.70
   4   3   0   28.50    5.40
  -4   3   0   31.80    4.50
   4   3   0   27.90    5.20
  -4   3   0   29.30    3.50
  -5  -3   0   25.10    5.80
  -5  -3   0   33.70    6.60
  -5  -3   0   36.70    7.70
   5  -3   0   36.90    4.50
   5  -3   0   21.80    6.40
   5  -3   0   38.70    7.10
   5  -3   0   31.00    5.60
  -5  -3   0   40.70    7.70
  -5  -3   0   36.40    6.10
   5  -3   0   36.00    7.10
   5   3   0   24.70    6.70
  -5   3   0   36.10    6.60
  -5   3   0   26.80    6.00
  -5   3   0   38.30    4.20
   5   3   0   32.50    8.10
  -5   3   0   29.90    4.40
   5   3   0   27.10    6.50
  -5   3   0   37.50    6.70
   5   3   0   34.90    6.20
   5   3   0   29.80    5.90
  -5   3   0   39.50    7.00
   5   3   0   47.00    6.10
  -6  -3   0  821.82   29.80
   6  -3   0  785.22   30.80
   6  -3   0  814.12   29.50
   6  -3   0  817.12   31.30
  -6  -3   0  812.32   31.30
   6  -3   0  754.22   31.00
   6  -3   0  840.52   30.80
   6  -3   0  768.72   26.80
  -6  -3   0  822.52   29.40
  -6  -3   0  816.62   30.60
  -6  -3   0  818.02   31.20
  -6   3   0  806.52   27.40
   6   3   0  800.22   31.20
  -6   3   0  825.92   27.10
   6   3   0  818.02   31.10
   6   3   0  828.92   29.50
   6   3   0  799.22   31.10
  -6   3   0  825.32   30.60
   6   3   0  777.02   30.80
  -6   3   0  831.32   31.20
  -6   3   0  820.82   30.90
   6   3   0  806.92   29.60
   7  -3   0   26.10    8.30
  -7  -3   0   29.60    8.30
  -7  -3   0   36.30    7.40
  -7  -3   0   14.40    5.60
  -7  -3   0   13.60    5.70
   7  -3   0   23.40    5.30
  -7  -3   0   22.30    7.80
   7  -3   0   39.90    8.70
   7  -3   0   16.10    3.70
  -7  -3   0   21.50    6.00
   7  -3   0   24.40    6.50
   7  -3   0   30.60    7.20
  -7  -3   0   17.40    6.80
   7  -3   0   22.70    6.40
   7   3   0   21.70    7.70
  -7   3   0   12.80    6.80
   7   3   0   14.90    5.90
   7   3   0    7.80    7.40
  -7   3   0   26.10    8.00
  -7   3   0   24.20    5.00
  -7   3   0   24.10    6.20
   7   3   0   30.10    6.30
  -7   3   0   18.50    4.00
   7   3   0   28.30    7.00
   7   3   0   15.70    7.80
  -7   3   0   21.50    6.40
   7   3   0   25.60    9.10
   8  -3   0  610.74   25.50
   8  -3   0  592.44   25.80
   8  -3   0  579.64   25.40
  -8  -3   0  567.74   25.70
   8  -3   0  579.44   22.40
   8  -3   0  589.84   25.30
  -8  -3   0  616.84   26.50
  -8  -3   0  594.04   25.20
   8  -3   0  587.54   26.30
  -8  -3   0  616.94   26.80
   8  -3   0  555.34   19.80
  -8  -3   0  584.84   25.50
  -8  -3   0  570.64   26.20
  -8  -3   0  616.64   26.30
   8   3   0  540.75   25.90
  -8   3   0  591.84   22.40
  -8   3   0  556.34   24.90
  -8   3   0  606.84   26.30
  -8   3   0  592.34   25.80
   8   3   0  591.04   26.30
   8   3   0  598.84   26.40
  -8   3   0  596.74   25.00
   8   3   0  576.14   23.30
   8   3   0  608.34   26.20
   8   3   0  582.04   24.80
   8   3   0  598.04   26.10
   9  -3   0 1887.81   61.29
  -9  -3   0 1847.02   65.39
   9  -3   0 1933.21   64.99
   9  -3   0 1828.92   64.89
   9  -3   0 1900.91   65.19
   9  -3   0 1876.81   64.79
  -9  -3   0 1931.01   64.89
  -9  -3   0 1925.81   65.09
   9  -3   0 1847.02   65.29
  -9  -3   0 1882.31   64.19
  -9  -3   0 1876.21   64.79
   9   3   0 1861.81   65.39
   9   3   0 1861.91   64.59
  -9   3   0 1935.71   64.89
   9   3   0 1896.31   65.29
  -9   3   0 1843.82   64.99
  -9   3   0 1834.12   64.99
  -9   3   0 1896.21   64.89
   9   3   0 1868.41   61.69
   9   3   0 1842.22   63.79
  -9   3   0 1897.71   64.29
  -9   3   0 1858.51   58.09
   9   3   0 1862.11   65.09
   9   3   0 1937.51   65.09
 -10  -3   0  916.21   37.00
 -10  -3   0  953.10   37.40
  10  -3   0  916.41   37.20
 -10  -3   0  952.70   36.70
  10  -3   0  867.81   36.00
  10  -3   0  893.91   36.60
  10  -3   0  905.91   37.40
 -10  -3   0  924.41   36.90
 -10  -3   0  856.31   35.70
  10  -3   0  900.51   33.20
 -10   3   0  894.21   35.80
 -10   3   0  898.11   35.80
  10   3   0  827.92   32.60
  10   3   0  919.31   37.30
  10   3   0  886.91   37.00
  10   3   0  841.42   36.50
  10   3   0  942.81   36.20
 -10   3   0  872.91   36.80
 -10   3   0  919.21   36.40
  10   3   0  968.60   40.70
  10   3   0  881.11   37.00
 -10   3   0  907.31   28.70
  11  -3   0  843.52   36.10
  11  -3   0  828.22   32.00
  11  -3   0  872.71   36.40
 -11  -3   0  861.91   36.00
  11  -3   0  954.90   46.40
 -11  -3   0  848.72   36.50
  11  -3   0  843.92   35.50
 -11  -3   0  853.21   34.70
 -11  -3   0  823.82   35.70
 -11  -3   0  865.21   35.40
  11   3   0  807.12   31.20
  11   3   0  858.51   35.00
 -11   3   0  744.23   33.80
  11   3   0  837.02   35.10
 -11   3   0  834.42   36.10
 -11   3   0  839.42   26.20
  11   3   0  876.31   39.70
  11   3   0  816.32   36.10
  11   3   0  790.42   35.60
 -11   3   0  850.41   35.40
 -11   3   0  851.31   32.20
  11   3   0  807.42   34.60
 -12  -3   0  413.36   24.20
  12  -3   0  422.06   25.20
  12  -3   0  436.26   23.60
 -12  -3   0  433.06   25.40
  12  -3   0  407.16   23.90
  12  -3   0  440.96   25.30
 -12  -3   0  404.96   19.20
  12  -3   0  456.75   21.00
 -12  -3   0  418.16   22.90
 -12  -3   0  427.36   23.70
 -12   3   0  413.56   23.70
  12   3   0  458.65   25.40
  12   3   0  399.56   23.60
  12   3   0  413.26   23.30
  12   3   0  427.76   24.90
  12   3   0  471.95   24.10
 -12   3   0  416.66   20.80
  12   3   0  440.96   23.90
 -12   3   0  399.06   24.70
  12   3   0  417.66   24.70
 -12   3   0  440.26   23.90
 -13  -3   0   90.29   15.40
  13  -3   0   63.49   14.30
 -13  -3   0   83.29    9.50
  13  -3   0   75.99   10.70
 -13  -3   0   83.49   13.10
 -13  -3   0   69.69   13.10
  13  -3   0   69.59   14.30
  13  -3   0   71.79   13.30
 -13  -3   0   89.79   14.20
  13  -3   0   82.39   15.20
 -13   3   0   84.89   12.90
 -13   3   0   81.19   11.00
 -13   3   0   71.39   11.60
  13   3   0   99.99   14.20
 -13   3   0   84.49   14.40
 -13   3   0   73.69   12.60
  13   3   0  100.59   15.50
  13   3   0   88.09   14.10
  13   3   0   70.69   12.70
  13   3   0   86.49   14.10
  13   3   0   78.39   12.70
 -14  -3   0  179.48   20.40
 -14  -3   0  143.59   16.60
  14  -3   0  122.09   14.10
  14  -3   0  130.59   17.70
 -14  -3   0  131.59   11.80
  14  -3   0  144.59   18.60
 -14  -3   0  118.39   17.20
  14  -3   0  140.89   17.70
  14  -3   0  148.59   18.40
  14   3   0  136.09   16.40
  14   3   0  187.58   19.60
 -14   3   0  160.08   21.10
  14   3   0  147.79   18.00
 -14   3   0  154.08   16.50
  14   3   0  149.29   18.10
  14   3   0  116.79   16.50
 -14   3   0  148.09   14.30
  15  -3   0  494.85   29.40
  15  -3   0  542.95   27.50
 -15  -3   0  515.35   23.40
 -15  -3   0  557.64   31.60
 -15  -3   0  528.75   31.60
  15  -3   0  525.65   31.70
  15  -3   0  580.64   32.30
  15  -3   0  583.74   31.90
 -15   3   0  546.55   26.90
  15   3   0  529.75   30.80
  15   3   0  514.05   30.70
  15   3   0  488.05   29.80
  15   3   0  521.35   29.40
  15   3   0  528.05   31.10
 -15   3   0  535.85   31.60
  16  -3   0  140.39   19.00
  16  -3   0  153.58   18.50
  16  -3   0  133.89   19.80
 -16  -3   0  143.69   20.00
 -16  -3   0  136.99   19.80
 -16  -3   0  126.79   11.70
  16  -3   0  140.29   16.00
  16  -3   0  145.09   18.30
  16   3   0  147.49   18.70
  16   3   0  149.19   20.70
  16   3   0  118.89   16.70
 -16   3   0  152.58   16.40
 -16   3   0  175.48   21.50
  16   3   0  129.69   19.50
  17  -3   0  178.18   22.70
 -17  -3   0  200.68   14.10
  17  -3   0  189.08   18.40
  17  -3   0  161.38   22.50
 -17  -3   0  224.48   24.20
  17  -3   0  154.98   21.10
 -17  -3   0  196.08   22.40
  17   3   0  200.48   23.00
  17   3   0  199.98   23.50
 -17   3   0  179.48   22.40
  17   3   0  189.58   22.90
  17   3   0  199.08   21.20
  18  -3   0  188.58   20.20
 -18  -3   0  195.18   13.70
 -18  -3   0  236.68   25.80
  18  -3   0  203.38   25.00
 -18  -3   0  260.67   26.60
  18  -3   0  193.98   24.20
  18  -3   0  156.48   22.40
  18   3   0  177.08   23.10
  18   3   0  204.78   22.60
  18   3   0  172.08   22.80
  18   3   0  158.98   21.20
 -18   3   0  150.78   22.20
  19  -3   0   -8.60   14.80
  19  -3   0   -0.90   15.50
 -19  -3   0    4.30   17.10
 -19  -3   0   11.40   14.60
  19  -3   0   15.80   13.00
  19  -3   0    3.30   15.90
  19   3   0   -4.20   17.00
  19   3   0    7.70   14.80
  19   3   0    8.90   15.80
  19   3   0  -21.60   15.50
 -19   3   0  -11.40   15.00
  20  -3   0  125.19   22.50
  20  -3   0  191.98   20.30
 -20  -3   0  133.09   23.10
 -20  -3   0  148.79   24.30
  20  -3   0  161.78   25.00
  20   3   0  154.58   23.30
 -20   3   0  122.99   23.30
  20   3   0  136.09   22.20
  20   3   0  166.78   24.20
  21  -3   0  107.29   23.40
 -21  -3   0  133.99   23.50
  21  -3   0  115.59   23.30
  21  -3   0  110.39   18.00
 -21  -3   0  112.09   22.60
  21  -3   0  142.19   24.50
  21   3   0  117.89   21.10
  21   3   0  162.98   26.10
 -21   3   0  107.29   22.70
  21   3   0  112.79   24.20
  21   3   0   98.29   22.40
 -22  -3   0  112.89   23.90
  22  -3   0  119.99   25.30
  22  -3   0  107.19   18.90
  22  -3   0  135.39   21.80
  22  -3   0   55.19   21.30
  22   3   0  111.29   22.50
  22   3   0  104.29   22.90
 -22   3   0   92.99   24.00
  22   3   0   96.39   22.50
  22   3   0  141.49   21.90
  23  -3   0   69.69   23.20
  23  -3   0   91.29   24.00
 -23  -3   0   67.09   22.90
  23  -3   0   69.89   23.30
  23  -3   0   66.49   17.20
  23   3   0   30.00   19.50
 -23   3   0   39.60   21.20
  23   3   0   67.19   21.90
  23   3   0   50.99   24.10
  23   3   0   86.09   23.90
  24  -3   0   -2.60   22.30
  24  -3   0   23.40   21.90
  24  -3   0    9.40   20.20
 -24  -3   0   53.39   22.70
  24  -3   0   -1.10   15.50
  24   3   0   13.00   16.70
  24   3   0    2.10   18.40
  24   3   0   -5.80   19.40
 -24   3   0   59.29   22.80
  24   3   0  -18.20   19.50
   0  -4   0  733.93   26.60
   0  -4   0  689.33   24.80
   0  -4   0  682.93   27.20
   0  -4   0  707.93   25.90
   0  -4   0  700.13   24.50
   0  -4   0  720.13   26.90
   0   4   0  738.43   26.80
   0   4   0  738.33   26.80
   0   4   0  743.43   26.70
   0   4   0  764.12   27.40
   0   4   0  729.43   24.90
   0   4   0  725.23   25.70
   0   4   0  717.53   27.10
   0   4   0  694.03   26.80
   1  -4   0 2111.89   69.59
  -1  -4   0 2159.38   69.19
  -1  -4   0 2118.49   69.29
   1  -4   0 2200.68   68.09
  -1  -4   0 2191.48   66.89
  -1  -4   0 2116.49   67.79
   1  -4   0 2101.89   68.69
  -1  -4   0 2164.08   69.79
   1  -4   0 2138.49   69.39
  -1  -4   0 2179.08   68.49
   1  -4   0 2220.28   66.79
  -1  -4   0 2169.98   69.39
   1  -4   0 2205.08   69.89
   1   4   0 2157.68   69.49
  -1   4   0 2177.98   69.19
   1   4   0 2071.69   69.59
  -1   4   0 2182.68   69.49
   1   4   0 2142.99   66.79
  -1   4   0 2151.08   66.69
  -1   4   0 2189.98   69.49
   1   4   0 2137.09   68.99
  -1   4   0 2103.69   67.69
  -1   4   0 2232.48   69.39
   1   4   0 2052.09   67.69
  -1   4   0 2152.78   69.49
   1   4   0 2132.69   69.29
   1   4   0 2129.59   68.79
   1   4   0 2087.59   71.39
  -1   4   0 2168.48   68.79
   2  -4   0 2285.07   72.09
  -2  -4   0 2138.69   69.09
  -2  -4   0 2249.57   71.49
   2  -4   0 2114.69   71.39
   2  -4   0 2293.57   70.39
   2  -4   0 2253.77   71.99
  -2  -4   0 2284.77   72.29
  -2  -4   0 2242.58   71.09
  -2  -4   0 2289.87   71.99
  -2  -4   0 2096.89   71.19
  -2  -4   0 2258.27   71.79
   2   4   0 2237.48   70.79
  -2   4   0 2212.78   69.99
   2   4   0 2172.98   72.29
  -2   4   0 2155.08   71.39
   2   4   0 2280.37   71.59
   2   4   0 2209.88   71.89
  -2   4   0 2134.89   70.69
   2   4   0 2253.47   69.09
   2   4   0 2249.87   71.29
   2   4   0 2279.97   70.89
  -2   4   0 2237.08   71.69
  -2   4   0 2313.07   71.79
   2   4   0 2163.78   71.69
   3  -4   0  656.83   25.30
  -3  -4   0  641.54   25.10
   3  -4   0  653.93   23.90
   3  -4   0  636.54   25.50
   3  -4   0  633.44   23.70
  -3  -4   0  645.94   25.90
  -3  -4   0  643.94   22.90
   3  -4   0  648.24   25.00
  -3  -4   0  623.64   24.60
   3  -4   0  664.13   25.90
  -3  -4   0  677.13   25.20
  -3  -4   0  681.93   25.30
  -3   4   0  642.54   25.10
   3   4   0  622.74   24.60
   3   4   0  650.13   24.90
  -3   4   0  629.64   23.90
   3   4   0  624.74   24.70
  -3   4   0  663.53   21.80
   3   4   0  640.84   22.70
   3   4   0  632.14   25.10
   3   4   0  647.14   25.80
  -3   4   0  700.93   25.50
  -3   4   0  622.34   25.20
   3   4   0  670.03   24.90
   3   4   0  623.24   25.50
  -4  -4   0  358.66   15.30
   4  -4   0  343.37   16.90
   4  -4   0  348.07   15.00
  -4  -4   0  368.26   16.90
   4  -4   0  356.06   17.60
   4  -4   0  360.96   15.60
  -4  -4   0  372.66   18.10
   4  -4   0  355.66   16.70
   4  -4   0  330.37   16.80
  -4  -4   0  372.06   17.50
  -4  -4   0  338.57   18.10
   4   4   0  374.66   15.10
   4   4   0  336.47   16.60
   4   4   0  356.56   17.40
  -4   4   0  357.66   17.30
   4   4   0  386.46   19.20
   4   4   0  376.56   16.50
  -4   4   0  351.66   17.00
  -4   4   0  340.57   15.10
  -4   4   0  341.17   15.10
   4   4   0  341.77   16.90
   4   4   0  350.96   17.60
  -4   4   0  383.86   17.60
   4   4   0  344.87   16.70
  -5  -4   0   42.40    6.90
   5  -4   0   39.70    8.40
  -5  -4   0   38.00    7.80
   5  -4   0   51.89    8.30
   5  -4   0   36.70    6.80
   5  -4   0   37.70    5.70
   5  -4   0   43.30    8.00
   5  -4   0   49.80    8.50
  -5  -4   0   30.90    8.10
  -5  -4   0   35.60    8.10
  -5  -4   0   43.40    8.30
   5   4   0   50.89    8.60
  -5   4   0   37.70    4.40
  -5   4   0   43.70    7.30
  -5   4   0   28.80    5.70
  -5   4   0   39.10    7.10
   5   4   0   43.80    7.60
   5   4   0   41.50    8.50
   5   4   0   33.50    7.60
  -5   4   0   40.90    6.60
   5   4   0   41.90    7.10
   5   4   0   27.70    7.70
   6  -4   0 2384.16   76.19
  -6  -4   0 2323.47   75.99
  -6  -4   0 2318.27   75.79
   6  -4   0 2186.38   75.89
   6  -4   0 2277.17   72.09
   6  -4   0 2256.17   75.69
   6  -4   0 2246.68   75.09
  -6  -4   0 2330.47   76.59
   6  -4   0 2316.57   75.59
  -6  -4   0 2308.37   74.09
  -6  -4   0 2319.17   75.89
  -6  -4   0 2356.66   76.09
   6  -4   0 2349.56   73.99
   6   4   0 2282.27   76.29
   6   4   0 2206.48   75.59
   6   4   0 2320.57   74.59
  -6   4   0 2249.87   75.69
  -6   4   0 2322.07   71.19
  -6   4   0 2333.47   75.39
  -6   4   0 2247.28   75.89
  -6   4   0 2308.87   75.29
   6   4   0 2299.07   76.09
  -6   4   0 2328.57   72.29
   6   4   0 2275.27   73.59
   6   4   0 2211.78   75.29
   7  -4   0 1009.90   37.10
   7  -4   0  992.50   38.10
   7  -4   0  944.11   37.10
  -7  -4   0 1020.90   37.40
  -7  -4   0  984.20   37.10
  -7  -4   0  994.50   37.60
   7  -4   0  944.91   37.40
   7  -4   0  950.00   35.60
  -7  -4   0  982.70   38.00
   7  -4   0 1011.90   37.20
  -7  -4   0  981.40   37.50
   7  -4   0  950.20   32.60
  -7  -4   0  965.60   35.70
   7   4   0  943.91   37.50
   7   4   0  952.20   37.00
   7   4   0 1002.20   37.60
  -7   4   0  958.30   32.90
  -7   4   0  911.71   36.40
   7   4   0  949.71   35.20
   7   4   0  970.30   36.80
  -7   4   0  976.30   37.00
   7   4   0  928.61   35.40
  -7   4   0  984.10   36.50
  -7   4   0  981.40   32.60
  -7   4   0  989.30   36.70
   8  -4   0 1831.12   61.59
   8  -4   0 1667.93   60.39
  -8  -4   0 1701.03   60.59
  -8  -4   0 1756.32   61.19
   8  -4   0 1726.33   55.09
   8  -4   0 1684.63   58.39
   8  -4   0 1737.33   60.29
  -8  -4   0 1708.03   60.19
   8  -4   0 1752.72   60.49
   8  -4   0 1794.32   61.39
  -8  -4   0 1723.43   58.49
  -8  -4   0 1726.53   58.99
  -8  -4   0 1778.42   61.09
   8   4   0 1692.43   60.89
  -8   4   0 1664.03   59.49
   8   4   0 1752.72   60.69
  -8   4   0 1709.23   60.49
   8   4   0 1692.03   60.79
  -8   4   0 1777.42   55.39
  -8   4   0 1756.12   59.99
  -8   4   0 1782.92   60.69
   8   4   0 1772.52   61.09
   8   4   0 1695.33   58.59
  -8   4   0 1717.13   55.79
   8   4   0 1772.92   58.49
  -9  -4   0  226.18   15.60
  -9  -4   0  215.08   17.10
  -9  -4   0  194.58   15.70
  -9  -4   0  225.38   17.20
   9  -4   0  228.68   10.30
   9  -4   0  235.88   15.80
   9  -4   0  215.38   15.80
  -9  -4   0  238.58   15.40
  -9  -4   0  225.28   15.00
   9  -4   0  216.68   15.80
   9  -4   0  209.88   17.20
   9  -4   0  201.78   14.50
   9  -4   0  212.88   15.00
  -9  -4   0  208.38   14.00
  -9   4   0  238.38   15.50
  -9   4   0  224.38   16.20
   9   4   0  183.38   14.60
   9   4   0  219.38   14.80
  -9   4   0  204.78   11.90
   9   4   0  220.38   16.80
  -9   4   0  199.18   15.40
   9   4   0  215.38   16.70
   9   4   0  206.48   16.50
   9   4   0  191.98   15.50
   9   4   0  231.88   14.00
  -9   4   0  223.98   16.90
  -9   4   0  225.88   10.60
 -10  -4   0  142.49   14.30
  10  -4   0  147.69   14.90
  10  -4   0  135.09   15.10
 -10  -4   0  118.69   14.00
 -10  -4   0  159.08   14.80
 -10  -4   0  129.69   14.40
  10  -4   0  122.29   15.10
 -10  -4   0  129.09   15.10
  10  -4   0  101.19    7.00
  10  -4   0  139.69   14.80
  10  -4   0  152.38   15.80
 -10  -4   0  127.69   14.50
  10  -4   0  131.89   12.70
 -10  -4   0  125.39   11.70
  10   4   0  146.49   14.70
  10   4   0  121.49   16.70
  10   4   0  116.39   14.70
  10   4   0  138.19   14.40
  10   4   0  169.48   15.90
 -10   4   0  148.29   15.10
 -10   4   0  124.79   13.80
 -10   4   0  136.19   13.90
  10   4   0  123.59   11.80
  10   4   0  130.29   13.30
 -10   4   0  119.59    7.70
 -11  -4   0  157.88   16.60
  11  -4   0  158.48   16.80
 -11  -4   0  163.28   15.70
 -11  -4   0  173.58   13.20
  11  -4   0  144.49   15.60
 -11  -4   0  140.59   15.10
 -11  -4   0  186.98   15.40
  11  -4   0  190.68   15.20
  11  -4   0  147.49   16.50
  11  -4   0  152.48   12.20
  11  -4   0  162.38   17.00
  11  -4   0  161.98   16.10
  11   4   0  158.18   13.20
 -11   4   0  146.39   11.40
 -11   4   0  157.88   16.50
 -11   4   0  166.78   17.80
  11   4   0  118.09   15.70
  11   4   0  166.28   18.20
  11   4   0  172.18   15.50
  11   4   0  162.28   17.20
 -11   4   0  166.48   13.80
  11   4   0  135.99   15.80
  11   4   0  183.98   17.80
 -11   4   0  156.48   13.50
  12  -4   0  560.94   27.80
 -12  -4   0  528.35   25.10
  12  -4   0  569.14   30.00
  12  -4   0  573.24   32.20
  12  -4   0  557.34   27.20
  12  -4   0  577.44   24.70
  12  -4   0  599.84   30.60
 -12  -4   0  559.84   28.70
 -12  -4   0  586.74   28.80
 -12  -4   0  566.14   30.40
 -12  -4   0  534.15   28.80
  12   4   0  565.74   28.50
 -12   4   0  600.04   30.60
 -12   4   0  585.34   19.10
 -12   4   0  574.24   28.60
  12   4   0  580.64   28.20
 -12   4   0  578.04   28.90
  12   4   0  614.44   30.40
  12   4   0  602.94   30.60
 -12   4   0  581.34   24.90
  12   4   0  598.24   25.40
 -12   4   0  547.75   28.50
 -13  -4   0   90.29   13.10
  13  -4   0  102.29   11.80
 -13  -4   0   88.99   16.00
  13  -4   0   87.99   15.80
 -13  -4   0   93.09   13.40
 -13  -4   0   82.29   10.60
  13  -4   0   93.59   15.30
 -13  -4   0   83.89   14.60
  13  -4   0   64.49   14.50
  13   4   0   76.79   15.00
 -13   4   0   87.39   12.70
  13   4   0   69.79   15.20
 -13   4   0   91.09   10.80
  13   4   0   91.59   14.30
 -13   4   0  109.09   15.50
  13   4   0  104.59   14.50
 -13   4   0   74.19   13.10
  13   4   0   73.79   15.40
  13   4   0   85.99   13.70
 -14  -4   0   11.70   12.00
 -14  -4   0   31.40   12.40
  14  -4   0   26.50   13.50
  14  -4   0   18.90    8.80
  14  -4   0   32.80   12.00
  14  -4   0   19.10   12.90
  14  -4   0   14.60   10.20
 -14  -4   0   19.00    7.90
  14   4   0   18.70   12.70
  14   4   0   20.40   11.10
 -14   4   0   42.50   14.10
  14   4   0   28.50   13.00
 -14   4   0   25.30    8.20
  14   4   0   17.30   12.80
  14   4   0   32.00   12.00
  15  -4   0   29.30   11.60
  15  -4   0   82.59   16.10
 -15  -4   0   41.50    9.40
 -15  -4   0   42.90   14.60
  15  -4   0   61.09   15.90
  15  -4   0   52.69   10.80
  15  -4   0   41.50   12.40
 -15  -4   0   45.40   14.80
  15   4   0   39.00   15.10
 -15   4   0   39.30   10.10
 -15   4   0   71.59   16.50
  15   4   0   65.09   16.50
  15   4   0   50.79   13.90
  15   4   0   41.90   14.50
  15   4   0   77.59   15.20
 -16  -4   0  111.19   18.30
  16  -4   0   84.79   15.80
  16  -4   0  137.29   20.10
  16  -4   0   92.39   18.10
 -16  -4   0   80.19   10.90
 -16  -4   0   94.69   18.20
  16  -4   0   70.89   12.60
  16   4   0   71.69   17.40
  16   4   0   81.29   16.00
 -16   4   0   99.79   18.90
  16   4   0  106.39   18.70
 -16   4   0   98.49   13.30
  16   4   0   94.89   18.10
  17  -4   0  197.68   22.80
  17  -4   0  138.29   16.40
  17  -4   0  118.79   20.60
  17  -4   0  170.08   21.80
 -17  -4   0  149.99   14.00
 -17  -4   0  149.99   21.40
 -17  -4   0   96.29   19.40
 -17   4   0  133.89   15.60
  17   4   0  153.88   21.40
  17   4   0  171.58   22.80
  17   4   0  147.99   20.00
 -17   4   0  132.39   21.50
  17   4   0  158.18   19.80
  18  -4   0  107.49   20.60
  18  -4   0   70.59   22.00
 -18  -4   0   54.09   18.90
 -18  -4   0   82.39   11.30
 -18  -4   0  105.89   18.90
  18  -4   0   92.19   20.30
  18  -4   0  107.39   15.30
  18   4   0  108.59   31.20
 -18   4   0   51.39   18.20
  18   4   0   71.69   16.70
  18   4   0  111.89   18.40
 -19  -4   0   31.70   16.40
 -19  -4   0   30.30    8.70
  19  -4   0   25.50   18.60
 -19  -4   0   54.59   20.40
  19  -4   0   19.00   17.20
  19  -4   0   37.70   20.00
  19  -4   0   46.50   13.80
 -19   4   0   22.30   17.60
  19   4   0   34.50   18.20
  19   4   0   53.09   19.20
  19   4   0   20.20   15.50
  19   4   0   11.90   17.80
  20  -4   0  169.88   25.90
  20  -4   0  231.08   24.40
  20  -4   0  195.88   19.60
 -20  -4   0  191.98   25.80
  20  -4   0  176.98   25.80
  20  -4   0  222.78   27.30
 -20  -4   0  189.08   25.40
  20   4   0  169.98   25.50
 -20   4   0  184.18   26.30
  20   4   0  194.88   27.00
  20   4   0  170.08   24.40
  20   4   0  153.98   23.90
 -21  -4   0  122.89   24.30
  21  -4   0  117.59   20.60
  21  -4   0   46.90   21.40
 -21  -4   0   96.69   22.20
  21  -4   0   58.79   22.00
  21  -4   0   88.69   22.30
  21   4   0   98.29   22.40
  21   4   0   78.09   22.10
  21   4   0   94.99   21.40
 -21   4   0   83.89   21.30
  21   4   0  101.29   21.90
  22  -4   0   16.70   16.80
  22  -4   0   14.60   18.70
  22  -4   0    6.80   18.90
 -22  -4   0   -5.30   30.80
 -22  -4   0   -1.20   18.20
  22  -4   0  -15.40   18.10
  22   4   0  -23.20   17.50
  22   4   0   24.60   17.50
  22   4   0  -34.40   16.80
 -22   4   0  -21.60   20.50
  22   4   0   -3.20   18.40
  23  -4   0   24.60   22.00
 -23  -4   0   -6.50   20.80
  23  -4   0   47.00   19.70
  23  -4   0   27.50   21.50
  23  -4   0   -0.90   20.10
  23   4   0  -13.60   17.50
  23   4   0   26.10   17.80
 -23   4   0    4.70   19.80
  23   4   0   10.20   20.10
  23   4   0   52.09   21.80
  24  -4   0  135.49   29.00
  24  -4   0  156.38   25.90
  24  -4   0  156.68   29.80
  24   4   0  132.09   28.90
  24   4   0  153.28   30.60
   0  -5   0    8.40    5.30
   0  -5   0    2.40    4.50
   0  -5   0    7.80    6.50
   0  -5   0    1.90    3.60
   0  -5   0   -4.10    5.90
   0  -5   0    1.10    3.60
   0  -5   0    3.80    4.20
   0   5   0   -0.20    6.20
   0   5   0   -5.70    3.90
   0   5   0   -2.10    5.50
   0   5   0    4.40    4.50
   0   5   0   -4.90    4.40
   0   5   0   -4.80    5.40
   1  -5   0 4638.34  141.59
   1  -5   0 4637.44  140.19
   1  -5   0 4479.35  138.39
  -1  -5   0 4541.55  141.59
  -1  -5   0 4431.26  138.49
   1  -5   0 4407.66  141.39
  -1  -5   0 4563.14  140.59
   1  -5   0 4552.04  140.99
  -1  -5   0 4503.15  141.49
  -1  -5   0 4480.55  142.19
   1  -5   0 4650.73  142.29
  -1  -5   0 4579.94  139.89
  -1   5   0 4411.36  141.19
  -1   5   0 4648.73  142.09
   1   5   0 4578.14  140.29
  -1   5   0 4455.25  138.49
  -1   5   0 4600.34  141.79
   1   5   0 4521.95  141.89
   1   5   0 4609.64  142.09
   1   5   0 4591.04  141.39
   1   5   0 4522.75  141.89
  -1   5   0 4491.85  139.69
  -1   5   0 4421.76  140.89
   1   5   0 4749.72  139.99
  -2  -5   0   -6.30    5.80
  -2  -5   0   -3.90    6.10
  -2  -5   0   -0.10    5.60
   2  -5   0    0.40    4.80
   2  -5   0   -3.10    4.80
  -2  -5   0   10.00    7.10
  -2  -5   0   -0.90    5.90
   2  -5   0   -1.40    4.40
   2  -5   0   -0.50    4.90
   2  -5   0  -10.20    5.80
   2  -5   0   -2.10    4.40
  -2  -5   0    0.50    4.10
  -2  -5   0    1.20    4.60
   2   5   0   -1.80    5.90
   2   5   0    1.50    5.20
   2   5   0    1.90    6.20
  -2   5   0    0.00    5.30
  -2   5   0    0.40    4.70
   2   5   0   -0.60    4.90
   2   5   0    1.00    4.70
  -2   5   0   -2.60    4.50
  -2   5   0   -0.50    3.40
   2   5   0   -1.10    4.50
   2   5   0    1.20    3.90
  -2   5   0    0.00    4.40
  -2   5   0  -11.40    5.10
  -3  -5   0 1555.24   53.49
   3  -5   0 1515.85   53.09
  -3  -5   0 1519.75   49.90
  -3  -5   0 1542.45   52.99
  -3  -5   0 1500.55   52.49
  -3  -5   0 1524.55   51.89
   3  -5   0 1511.25   51.39
  -3  -5   0 1519.25   52.09
   3  -5   0 1488.55   50.99
   3  -5   0 1481.45   52.59
  -3  -5   0 1600.44   52.99
   3  -5   0 1476.95   53.19
   3  -5   0 1543.35   53.49
   3   5   0 1546.65   51.99
  -3   5   0 1495.45   51.49
  -3   5   0 1568.64   52.49
   3   5   0 1487.65   49.60
   3   5   0 1609.04   53.69
   3   5   0 1601.54   53.59
  -3   5   0 1562.44   50.79
  -3   5   0 1536.55   52.79
  -3   5   0 1565.34   52.49
   3   5   0 1571.34   53.69
   3   5   0 1547.15   52.59
  -3   5   0 1530.55   48.70
   3   5   0 1558.04   51.89
   4  -5   0   10.90    5.90
  -4  -5   0   -5.20    7.40
  -4  -5   0   -0.30    7.20
  -4  -5   0   13.30    5.50
   4  -5   0   -0.50    7.60
   4  -5   0   -4.80    7.10
  -4  -5   0   -3.20    5.80
  -4  -5   0    8.80    6.00
   4  -5   0   -2.70    7.00
   4  -5   0   -0.20    5.00
  -4  -5   0   -4.40    5.60
  -4  -5   0   -7.50    6.50
   4  -5   0    0.40    5.00
   4   5   0    0.00    6.90
  -4   5   0    7.20    5.30
  -4   5   0   -1.00    5.80
  -4   5   0   10.70    5.50
   4   5   0   11.30    6.50
  -4   5   0    6.70    6.10
   4   5   0   11.20    6.50
  -4   5   0    8.60    7.70
   4   5   0    5.90    4.60
   4   5   0   -2.40    5.30
   4   5   0    8.50    5.50
  -4   5   0    4.70    3.50
   4   5   0   10.60    6.10
  -4   5   0   13.40    7.10
   4   5   0    6.80    6.50
  -5  -5   0   46.60    8.40
   5  -5   0   34.10    6.40
  -5  -5   0   20.10    8.30
   5  -5   0   30.60    7.10
  -5  -5   0   35.10    8.20
  -5  -5   0   25.40    6.70
   5  -5   0   32.10    8.60
   5  -5   0   47.30   10.00
   5  -5   0   33.40    8.00
   5  -5   0   31.00    7.50
  -5  -5   0   54.29    8.80
  -5  -5   0   37.30    7.60
  -5  -5   0   44.60    9.30
   5  -5   0   17.90    8.30
  -5   5   0   47.90    7.70
   5   5   0   27.10    8.00
   5   5   0   34.60    9.00
   5   5   0   34.00    6.00
  -5   5   0   25.90    6.40
  -5   5   0   45.30    8.70
  -5   5   0   45.20    7.50
   5   5   0   33.00    9.20
  -5   5   0   45.20    9.00
  -5   5   0   32.40    9.20
   5   5   0   39.80    8.60
  -5   5   0   32.20    4.30
   5   5   0   48.80    9.10
   5   5   0   32.00    7.90
   5   5   0   30.50    8.90
  -6  -5   0   44.60   10.30
   6  -5   0   58.09    9.80
   6  -5   0   53.19   10.30
   6  -5   0   29.40    7.50
  -6  -5   0   52.69   10.20
   6  -5   0   53.49    8.70
   6  -5   0   68.79    9.50
  -6  -5   0   58.09    9.80
  -6  -5   0   48.30   10.20
   6  -5   0   51.69   10.70
  -6  -5   0   60.29    8.50
  -6  -5   0   39.10    9.10
  -6  -5   0   45.60    8.70
   6  -5   0   54.39    7.40
   6   5   0   44.80    8.50
   6   5   0   54.99    8.30
  -6   5   0   47.50    9.90
   6   5   0   54.19   10.10
  -6   5   0   60.59   10.00
   6   5   0   57.99    9.40
  -6   5   0   44.70    8.40
   6   5   0   62.89    9.50
   6   5   0   46.70    7.10
  -6   5   0   55.29    5.30
  -6   5   0   51.39    9.30
   6   5   0   57.79   10.00
   6   5   0   51.19    9.10
  -6   5   0   44.00    7.10
   7  -5   0  642.34   26.20
  -7  -5   0  644.04   26.10
  -7  -5   0  633.34   27.00
   7  -5   0  670.33   28.30
   7  -5   0  620.14   24.10
  -7  -5   0  658.33   28.30
   7  -5   0  645.44   29.40
  -7  -5   0  662.43   29.00
  -7  -5   0  672.73   29.60
  -7  -5   0  615.64   27.60
   7  -5   0  708.93   29.70
   7  -5   0  640.24   27.50
   7  -5   0  644.24   28.80
  -7  -5   0  688.03   28.60
  -7   5   0  637.04   27.50
  -7   5   0  630.54   22.60
   7   5   0  565.84   27.30
   7   5   0  610.84   27.70
   7   5   0  648.24   29.10
   7   5   0  632.94   27.40
  -7   5   0  621.74   28.60
  -7   5   0  632.44   24.50
   7   5   0  674.93   28.00
   7   5   0  646.34   28.10
  -7   5   0  588.44   26.70
   7   5   0  629.74   25.80
   7   5   0  609.14   26.80
  -7   5   0  686.43   28.90
  -8  -5   0    8.20    6.00
  -8  -5   0    0.70    6.20
   8  -5   0   17.10    8.00
   8  -5   0    3.30    4.60
   8  -5   0    7.60    8.30
   8  -5   0   -0.90    8.10
  -8  -5   0    3.10    8.20
   8  -5   0   15.80    7.20
  -8  -5   0   11.40    6.90
   8  -5   0   14.70    8.20
  -8  -5   0   -8.10    7.80
  -8  -5   0   -1.60    6.70
   8  -5   0   13.20    9.60
  -8  -5   0    8.10    6.90
  -8   5   0   -2.60    6.80
   8   5   0   -5.40    7.90
   8   5   0    5.80    6.40
  -8   5   0   -4.20    7.40
   8   5   0   -3.60    6.60
   8   5   0   15.30    9.00
   8   5   0   -0.10    2.90
   8   5   0   -0.10    6.30
  -8   5   0   -3.20    8.60
  -8   5   0   -0.40    3.90
   8   5   0   11.00    8.40
  -8   5   0    6.30    7.70
  -8   5   0    8.20    5.10
   8   5   0   -1.70    8.60
   9  -5   0  113.59   12.20
  -9  -5   0   94.19   13.00
   9  -5   0  101.69   13.60
  -9  -5   0  107.39   12.90
   9  -5   0  112.89   13.60
  -9  -5   0  101.29   11.90
   9  -5   0  129.09   15.30
   9  -5   0  103.19   13.80
  -9  -5   0   95.79   13.80
  -9  -5   0   87.69   13.50
  -9  -5   0  124.29   12.60
   9   5   0  113.79   13.20
   9   5   0  139.39   12.60
  -9   5   0  110.29    9.60
  -9   5   0  126.19   12.70
  -9   5   0   98.89   13.90
  -9   5   0  102.79    8.90
   9   5   0   98.09   13.60
  -9   5   0  130.79   15.00
   9   5   0  131.89   12.50
   9   5   0  100.19   13.80
  -9   5   0  139.79   14.10
 -10  -5   0   63.39   10.30
  10  -5   0   72.89   10.80
 -10  -5   0   76.99   13.60
 -10  -5   0   52.89   10.30
 -10  -5   0   86.49   14.20
 -10  -5   0   51.09   10.80
  10  -5   0   74.09   11.40
  10  -5   0   46.20   11.70
  10  -5   0   55.99   11.30
  10  -5   0   51.99   10.90
  10  -5   0   61.09   10.30
 -10  -5   0   69.59   10.70
  10  -5   0   76.59    7.20
  10   5   0   77.39   13.00
 -10   5   0   75.79    7.50
 -10   5   0   62.89   11.70
  10   5   0   67.69   10.50
  10   5   0   64.79   10.00
 -10   5   0   57.99   12.70
 -10   5   0   67.39    7.70
 -10   5   0   59.99   12.10
  10   5   0   74.19   11.60
 -10   5   0   46.50   11.00
  10   5   0   77.99   11.80
  10   5   0   66.69   12.50
  11  -5   0  270.67   20.90
 -11  -5   0  302.37   22.00
  11  -5   0  268.67   19.60
  11  -5   0  285.47   12.80
 -11  -5   0  255.67   21.00
  11  -5   0  245.68   20.40
 -11  -5   0  265.77   19.10
 -11  -5   0  297.47   18.20
  11  -5   0  276.57   19.80
  11  -5   0  280.77   18.80
  11  -5   0  254.87   21.20
 -11  -5   0  272.77   19.30
 -11   5   0  341.37   22.10
  11   5   0  274.07   20.50
 -11   5   0  292.47   18.50
  11   5   0  311.47   21.60
  11   5   0  271.97   21.30
  11   5   0  273.17   21.20
 -11   5   0  281.67   12.90
  11   5   0  284.47   18.40
  11   5   0  280.87   18.10
 -11   5   0  274.17   19.70
 -11   5   0  289.27   18.90
 -12  -5   0   40.20   10.00
  12  -5   0   29.60   13.30
  12  -5   0   38.80   13.10
 -12  -5   0   52.19   12.10
  12  -5   0   45.90   11.40
  12  -5   0   21.00   11.30
 -12  -5   0   39.20   10.80
 -12  -5   0   58.79   10.80
 -12  -5   0   40.60   12.70
  12  -5   0   33.00   12.50
 -12   5   0   28.20   10.50
  12   5   0   50.79   13.10
  12   5   0   41.70   11.00
 -12   5   0   43.60    5.50
  12   5   0   49.50   10.40
 -12   5   0   39.70    7.90
 -12   5   0   44.60   13.20
  12   5   0   70.39   15.70
 -12   5   0   31.30   11.30
  12   5   0   43.90   13.30
  12   5   0   33.80   10.50
 -13  -5   0  240.18   20.70
  13  -5   0  248.78   20.20
 -13  -5   0  266.27   20.90
 -13  -5   0  233.08   17.00
  13  -5   0  226.48   22.70
  13  -5   0  246.78   19.70
  13  -5   0  195.48   18.70
 -13  -5   0  275.77   24.60
  13  -5   0  227.88   21.00
 -13   5   0  251.77   15.70
 -13   5   0  207.08   21.70
  13   5   0  218.48   21.60
  13   5   0  240.98   17.40
  13   5   0  257.27   19.30
  13   5   0  238.88   22.60
  13   5   0  267.87   22.80
  13   5   0  260.37   23.00
  14  -5   0   21.80   10.80
  14  -5   0    0.80   13.00
 -14  -5   0   -1.10   12.60
  14  -5   0    5.50   13.50
 -14  -5   0   13.80    8.30
  14  -5   0   14.30   13.50
 -14  -5   0   11.50   11.60
  14  -5   0   13.70   10.40
  14   5   0  -12.90   11.90
 -14   5   0   12.00   12.20
  14   5   0    0.10    9.50
  14   5   0   39.90   14.10
  14   5   0   23.90    9.90
 -14   5   0    7.20    7.30
  14   5   0    6.50   10.50
  15  -5   0  445.26   30.00
 -15  -5   0  400.06   24.20
  15  -5   0  420.16   29.80
  15  -5   0  395.06   26.10
 -15  -5   0  404.56   29.40
 -15  -5   0  418.66   27.70
  15  -5   0  375.16   28.90
  15   5   0  363.96   26.20
  15   5   0  414.56   26.70
  15   5   0  415.76   28.70
 -15   5   0  415.06   21.80
  15   5   0  395.46   28.70
 -15   5   0  421.46   29.40
  16  -5   0  176.98   19.90
 -16  -5   0  135.19   21.20
  16  -5   0  117.09   17.80
 -16  -5   0  202.78   21.90
  16  -5   0  194.08   22.50
  16  -5   0  159.18   22.40
  16   5   0  163.98   22.30
 -16   5   0  175.68   22.90
  16   5   0  190.98   23.00
  16   5   0  170.48   20.40
  16   5   0  198.28   23.20
 -17  -5   0   44.60   10.00
 -17  -5   0   11.10   14.50
 -17  -5   0   15.50   16.10
  17  -5   0   50.49   15.20
  17  -5   0   11.20   12.00
  17  -5   0   30.10   17.00
  17  -5   0   52.79   17.10
  17   5   0   21.70   16.30
  17   5   0   45.40   15.30
 -17   5   0   42.30   16.80
  17   5   0   42.90   17.40
  17   5   0   48.30   17.60
 -17   5   0   36.50   10.80
  18  -5   0   17.40   17.30
  18  -5   0   46.80   17.30
  18  -5   0  -11.50   12.90
 -18  -5   0   15.80   17.20
  18  -5   0  -17.10   15.40
 -18  -5   0   -7.10   12.90
 -18  -5   0    3.30    8.80
  18   5   0    7.80   14.20
  18   5   0   25.70   17.00
  18   5   0   -8.60   11.50
  18   5   0   -7.80   14.50
 -18   5   0   34.80   17.90
 -19  -5   0  746.33   58.99
  19  -5   0  552.34   35.00
  19  -5   0  607.74   39.30
 -19  -5   0  626.14   39.70
 -19  -5   0  569.64   28.00
  19  -5   0  656.93   40.90
  19  -5   0  583.04   38.40
  19   5   0  560.04   38.70
  19   5   0  588.04   39.30
 -19   5   0  575.64   38.60
  19   5   0  550.24   35.40
  19   5   0  577.44   35.90
 -20  -5   0   18.00   17.40
  20  -5   0   -9.90   17.30
  20  -5   0   12.00   18.70
 -20  -5   0   17.30    9.90
  20  -5   0  -18.50   13.90
 -20  -5   0   10.10   17.50
  20  -5   0  -10.80   17.90
  20   5   0    9.20   16.40
  20   5   0   -6.70   17.10
 -20   5   0   -4.70   16.10
  20   5   0    9.70   19.10
  20   5   0  -19.70   17.30
  21  -5   0  104.79   20.20
  21  -5   0   57.59   21.70
  21  -5   0   84.59   23.90
 -21  -5   0  137.29   23.80
  21  -5   0  113.79   23.70
 -21  -5   0  172.58   25.70
  21   5   0  129.09   23.70
  21   5   0   68.89   19.20
  21   5   0   81.49   23.00
  21   5   0  124.99   24.20
 -21   5   0   71.89   23.20
  22  -5   0    7.80   19.80
 -22  -5   0   33.70   21.50
  22  -5   0    5.90   17.50
  22  -5   0   -1.40   19.70
  22  -5   0   32.40   21.50
 -22  -5   0   27.70   19.60
 -22   5   0   24.20   21.00
  22   5   0   22.30   15.70
  22   5   0    4.40   20.30
  22   5   0   -8.50   17.40
  22   5   0    7.10   20.30
  23  -5   0   56.19   24.10
  23  -5   0   58.79   21.40
 -23  -5   0   72.49   24.30
  23  -5   0   61.49   25.10
  23   5   0   79.19   22.20
 -23   5   0   46.50   22.60
  23   5   0   50.49   23.10
   0  -6   0    2.10    6.80
   0  -6   0    9.00    7.10
   0  -6   0   20.90    7.70
   0  -6   0   15.30    6.80
   0  -6   0    5.70    4.80
   0  -6   0   22.30    8.40
   0  -6   0    5.60    4.70
   0   6   0   18.40    8.00
   0   6   0   18.20    5.90
   0   6   0   28.40    7.30
   0   6   0   10.60    8.00
   0   6   0   21.00    6.30
   0   6   0   15.10    6.20
   0   6   0    6.10    7.10
  -1  -6   0  379.06   18.60
   1  -6   0  341.27   19.60
   1  -6   0  361.56   18.20
  -1  -6   0  343.57   15.60
   1  -6   0  326.37   15.30
   1  -6   0  357.66   16.30
  -1  -6   0  371.06   17.90
  -1  -6   0  331.37   18.60
   1  -6   0  358.76   17.80
   1  -6   0  375.86   20.00
  -1  -6   0  356.36   20.30
   1  -6   0  357.86   18.90
  -1  -6   0  352.16   19.60
  -1  -6   0  351.56   18.80
  -1  -6   0  373.26   17.00
   1   6   0  351.26   19.60
   1   6   0  355.96   18.80
   1   6   0  345.77   18.20
   1   6   0  365.36   19.50
  -1   6   0  347.97   15.50
  -1   6   0  338.87   18.70
  -1   6   0  344.17   18.30
  -1   6   0  344.67   18.50
   1   6   0  365.66   16.80
   1   6   0  377.76   18.30
   1   6   0  376.46   17.60
  -1   6   0  340.47   19.30
  -1   6   0  351.36   17.00
  -1   6   0  355.76   18.90
  -1   6   0  341.77   18.60
   1   6   0  347.07   18.80
   2  -6   0  295.37   16.70
  -2  -6   0  259.37   17.60
   2  -6   0  249.28   15.20
   2  -6   0  276.47   16.70
  -2  -6   0  274.17   15.30
   2  -6   0  285.77   16.40
  -2  -6   0  282.27   16.90
   2  -6   0  260.17   15.50
   2  -6   0  281.57   17.90
  -2  -6   0  288.07   17.70
  -2  -6   0  277.07   16.50
  -2  -6   0  270.87   16.60
  -2  -6   0  268.17   13.40
   2   6   0  279.07   17.20
   2   6   0  295.27   17.50
   2   6   0  271.77   17.50
  -2   6   0  263.97   12.70
   2   6   0  290.77   16.70
   2   6   0  263.97   16.60
   2   6   0  299.17   15.30
  -2   6   0  287.27   17.10
   2   6   0  284.77   15.60
   2   6   0  285.67   13.20
  -2   6   0  268.77   15.90
  -2   6   0  282.27   17.20
  -2   6   0  272.37   16.60
  -2   6   0  275.87   17.50
  -2   6   0  267.97   16.60
  -2   6   0  285.47   14.70
  -2   6   0  291.07   16.20
  -3  -6   0  685.03   29.10
   3  -6   0  691.93   29.30
  -3  -6   0  698.93   27.80
  -3  -6   0  719.23   29.30
   3  -6   0  666.53   27.40
  -3  -6   0  719.23   29.70
  -3  -6   0  695.23   25.80
  -3  -6   0  717.53   29.80
  -3  -6   0  707.33   28.30
   3  -6   0  737.13   29.40
   3  -6   0  720.63   30.20
  -3  -6   0  714.53   30.70
   3  -6   0  722.23   29.50
   3  -6   0  686.93   27.70
   3   6   0  690.53   29.70
   3   6   0  734.93   29.20
   3   6   0  688.23   29.70
   3   6   0  612.74   26.50
  -3   6   0  718.53   26.90
  -3   6   0  672.03   29.60
  -3   6   0  740.83   29.40
  -3   6   0  664.53   29.60
   3   6   0  691.53   30.00
   3   6   0  694.13   28.10
   3   6   0  694.93   28.30
   3   6   0  718.63   29.60
  -3   6   0  706.83   29.20
  -3   6   0  624.84   27.70
  -3   6   0  692.63   24.60
  -4  -6   0  175.08   14.10
   4  -6   0  166.18   13.50
  -4  -6   0  139.29   12.70
   4  -6   0  139.39   15.10
  -4  -6   0  151.58   13.80
  -4  -6   0  127.59   14.30
  -4  -6   0  146.49   11.80
  -4  -6   0  148.79   10.70
   4  -6   0  158.08   12.00
   4  -6   0  158.98   11.80
  -4  -6   0  163.38   12.70
   4  -6   0  148.69   14.90
   4  -6   0  142.99   14.40
  -4   6   0  159.78    8.80
   4   6   0  156.98   12.80
  -4   6   0  150.88   11.10
   4   6   0  139.89   11.40
  -4   6   0  156.98   12.80
   4   6   0  173.38   10.50
   4   6   0  163.48   14.30
  -4   6   0  180.48   13.50
   4   6   0  161.68   14.50
   4   6   0  149.69   13.10
   4   6   0  154.08   13.50
   4   6   0  150.38   12.20
  -4   6   0  154.28   11.80
  -4   6   0  170.68   15.20
  -5  -6   0  104.49   11.80
   5  -6   0   97.39   10.40
   5  -6   0  128.99   13.90
   5  -6   0  116.29   10.10
  -5  -6   0  106.79    9.90
  -5  -6   0  140.39   13.20
   5  -6   0  125.49   13.30
  -5  -6   0  126.19   13.30
  -5  -6   0  107.59   13.40
  -5  -6   0   99.29   11.90
   5  -6   0  108.99   11.70
  -5  -6   0  119.89   13.10
   5  -6   0  106.19   13.00
  -5   6   0  104.39   12.60
  -5   6   0   99.09    7.50
   5   6   0  120.59   13.30
   5   6   0  107.29   12.40
   5   6   0  126.09   12.80
  -5   6   0  109.79   13.10
   5   6   0   93.29   11.90
  -5   6   0  122.39   12.70
  -5   6   0  141.49   12.10
   5   6   0  119.79   12.30
   5   6   0  128.89    9.60
   5   6   0  125.09   12.70
   5   6   0   89.89   12.30
  -5   6   0  109.29   12.50
  -5   6   0  122.49   10.60
  -6  -6   0 1581.44   56.29
   6  -6   0 1633.74   56.49
   6  -6   0 1549.94   54.79
   6  -6   0 1633.94   54.19
   6  -6   0 1557.54   56.59
   6  -6   0 1567.54   53.19
  -6  -6   0 1521.15   55.39
   6  -6   0 1589.04   56.49
  -6  -6   0 1619.44   56.99
   6  -6   0 1583.34   57.19
  -6  -6   0 1564.44   53.09
  -6  -6   0 1581.34   55.99
  -6  -6   0 1659.83   56.99
  -6  -6   0 1554.64   57.39
   6   6   0 1589.44   55.89
  -6   6   0 1565.54   53.49
  -6   6   0 1677.83   56.39
  -6   6   0 1543.25   50.09
   6   6   0 1582.64   52.89
  -6   6   0 1509.35   56.49
   6   6   0 1496.25   54.99
  -6   6   0 1577.04   55.79
  -6   6   0 1526.35   53.39
   6   6   0 1589.94   56.19
   6   6   0 1538.35   56.79
  -6   6   0 1553.44   56.39
   6   6   0 1581.24   55.69
   6   6   0 1537.85   56.89
  -6   6   0 1537.55   49.70
   6   6   0 1498.65   56.09
   7  -6   0  643.14   30.30
   7  -6   0  648.34   30.90
   7  -6   0  654.33   28.40
   7  -6   0  685.63   26.80
  -7  -6   0  647.94   27.60
   7  -6   0  690.63   28.40
  -7  -6   0  692.13   31.20
  -7  -6   0  694.93   31.70
  -7  -6   0  698.23   30.20
  -7  -6   0  687.53   29.60
   7  -6   0  670.53   31.00
  -7  -6   0  670.33   30.10
   7  -6   0  680.23   30.20
  -7  -6   0  654.63   30.00
  -7   6   0  690.63   30.20
   7   6   0  689.83   30.40
  -7   6   0  705.23   27.30
   7   6   0  727.73   31.70
  -7   6   0  695.73   23.90
  -7   6   0  645.74   29.20
  -7   6   0  691.53   31.00
   7   6   0  685.83   30.70
   7   6   0  704.23   29.70
  -7   6   0  701.63   31.40
   7   6   0  702.73   27.40
   7   6   0  717.43   30.10
   7   6   0  656.63   31.20
  -8  -6   0  747.03   33.70
  -8  -6   0  747.03   33.30
  -8  -6   0  749.13   32.90
  -8  -6   0  734.73   33.10
   8  -6   0  776.92   32.10
  -8  -6   0  742.33   30.30
  -8  -6   0  719.73   32.50
   8  -6   0  696.63   37.20
   8  -6   0  756.32   28.30
   8  -6   0  738.93   32.40
   8  -6   0  745.43   30.60
  -8  -6   0  746.43   31.60
   8  -6   0  733.13   31.70
   8  -6   0  685.23   32.90
  -8   6   0  786.42   32.60
   8   6   0  756.72   32.40
  -8   6   0  744.93   28.70
   8   6   0  798.72   34.20
   8   6   0  727.33   33.70
  -8   6   0  753.32   31.90
  -8   6   0  743.03   33.60
   8   6   0  772.02   33.10
  -8   6   0  726.13   26.00
   8   6   0  700.43   31.40
  -8   6   0  747.53   32.50
   8   6   0  705.43   29.30
   8   6   0  743.33   31.60
   8   6   0  734.53   33.60
   9  -6   0    4.90    9.30
   9  -6   0   23.30   11.30
   9  -6   0   10.10    8.40
   9  -6   0   13.60    5.70
   9  -6   0    1.50    8.30
  -9  -6   0    1.70    8.70
  -9  -6   0    2.70   10.20
   9  -6   0    8.80    9.70
  -9  -6   0    5.40    9.40
  -9  -6   0   14.70    8.30
  -9  -6   0    7.10    7.90
  -9  -6   0   14.00    7.90
  -9  -6   0   12.80    7.40
   9  -6   0   -6.20    7.90
  -9   6   0    9.20    6.30
   9   6   0    6.60   10.40
  -9   6   0   10.50    7.10
   9   6   0   10.40    8.30
  -9   6   0    9.90    8.10
  -9   6   0    8.90    5.40
   9   6   0    7.80    8.20
  -9   6   0   11.20   10.30
   9   6   0   24.80   10.40
   9   6   0    7.90   10.00
  -9   6   0    2.80    8.20
   9   6   0   -9.80    6.40
   9   6   0   15.90    9.30
 -10  -6   0  561.14   31.30
  10  -6   0  687.83   31.00
 -10  -6   0  619.64   32.10
  10  -6   0  632.64   31.00
  10  -6   0  631.54   28.70
  10  -6   0  691.53   33.30
  10  -6   0  657.73   32.70
  10  -6   0  624.34   31.80
  10  -6   0  630.04   24.70
 -10  -6   0  661.13   30.90
 -10  -6   0  656.73   29.10
 -10  -6   0  646.74   29.40
 -10  -6   0  645.74   31.60
  10   6   0  683.53   32.30
  10   6   0  637.04   31.70
 -10   6   0  631.94   25.10
  10   6   0  605.14   29.60
  10   6   0  602.24   31.60
 -10   6   0  541.35   28.80
 -10   6   0  629.44   24.20
  10   6   0  694.13   29.70
  10   6   0  683.93   29.20
  10   6   0  615.94   31.70
 -10   6   0  605.74   29.70
 -10   6   0  700.53   31.70
 -11  -6   0   17.50    9.30
  11  -6   0   15.10   11.70
 -11  -6   0   38.70   10.60
  11  -6   0   -2.10   10.40
 -11  -6   0   25.90   10.50
  11  -6   0    7.60    5.30
  11  -6   0   15.90   11.80
  11  -6   0   21.60   10.00
 -11  -6   0    6.20    8.80
 -11  -6   0   10.80    8.40
 -11   6   0    8.10   11.50
  11   6   0    5.80    9.80
 -11   6   0   32.30   10.40
 -11   6   0   26.40    8.60
  11   6   0   26.10    9.50
  11   6   0   48.60   12.80
  11   6   0    5.90   11.50
 -11   6   0   25.50    6.50
  11   6   0    3.80    8.50
  11   6   0   29.40   11.40
 -12  -6   0  621.34   34.40
 -12  -6   0  623.94   33.00
  12  -6   0  670.23   35.20
  12  -6   0  680.33   33.10
 -12  -6   0  655.43   34.50
  12  -6   0  699.03   35.00
 -12  -6   0  656.53   31.40
  12  -6   0  667.43   24.60
  12  -6   0  654.83   34.70
  12  -6   0  716.73   31.70
 -12  -6   0  691.23   31.10
  12   6   0  598.14   29.90
  12   6   0  703.73   34.70
 -12   6   0  641.04   24.70
  12   6   0  629.94   34.20
  12   6   0  687.03   34.80
  12   6   0  673.53   34.30
  12   6   0  655.33   31.00
 -12   6   0  639.34   34.20
 -12   6   0  612.14   32.20
 -13  -6   0  622.94   30.20
 -13  -6   0  595.44   34.70
  13  -6   0  591.14   32.50
  13  -6   0  614.84   34.90
 -13  -6   0  682.93   32.40
  13  -6   0  620.14   31.10
  13  -6   0  647.94   35.20
  13  -6   0  599.54   34.30
  13   6   0  642.34   30.80
  13   6   0  602.04   34.20
 -13   6   0  662.23   23.60
  13   6   0  595.44   32.40
  13   6   0  624.74   34.00
  13   6   0  684.13   31.10
 -13   6   0  645.74   35.00
 -13   6   0  625.34   26.20
  13   6   0  632.94   34.80
 -14  -6   0   -1.10    8.30
 -14  -6   0    9.00   11.90
  14  -6   0   -1.80   14.10
  14  -6   0   18.20   14.30
  14  -6   0   -2.10   11.80
 -14  -6   0   25.20   15.00
  14  -6   0    5.90   11.80
  14   6   0   -8.20   12.90
  14   6   0    1.70   10.80
  14   6   0    1.60   10.10
 -14   6   0    3.80    6.90
  14   6   0   -5.90    8.80
 -14   6   0    7.50   13.80
 -14   6   0    0.60    4.00
 -15  -6   0  136.09   20.20
  15  -6   0  110.99   17.10
 -15  -6   0  132.29   17.90
  15  -6   0  130.59   19.70
 -15  -6   0   97.39   14.20
  15  -6   0  142.49   21.00
  15  -6   0  118.49   20.00
 -15   6   0   96.29   18.80
  15   6   0  162.68   21.20
  15   6   0  133.89   20.80
  15   6   0  106.29   19.50
  15   6   0  122.69   15.60
 -15   6   0  115.59   12.40
 -16  -6   0  -15.50   13.30
  16  -6   0    8.80   11.30
 -16  -6   0   -2.10   13.00
 -16  -6   0    8.20    8.90
  16  -6   0   -6.60   12.30
  16  -6   0   -9.00   13.80
  16  -6   0   22.00   15.50
  16   6   0    6.20   16.00
 -16   6   0    8.40   15.60
 -16   6   0    2.60    7.90
  16   6   0  -17.70   13.50
  16   6   0   -4.20   12.20
  16   6   0   14.60   16.10
 -17  -6   0   14.90   11.70
  17  -6   0   17.00   16.30
 -17  -6   0   35.00   15.90
  17  -6   0    9.80   16.40
 -17  -6   0   -9.30   14.80
  17  -6   0    1.60   13.00
  17   6   0   -9.20   15.70
 -17   6   0  -10.70   14.70
  17   6   0   -2.60   11.90
 -17   6   0    5.50    8.60
  17   6   0   12.20   14.00
  17   6   0   -3.40   18.30
 -18  -6   0   20.80   16.80
 -18  -6   0  -16.70   13.50
  18  -6   0   13.50   17.40
  18  -6   0   16.40   16.80
  18  -6   0  -13.50   13.10
  18  -6   0   -8.80   16.20
 -18   6   0   14.60    9.80
 -18   6   0    9.50   15.70
  18   6   0   20.80   17.70
  18   6   0  -21.90   13.20
  18   6   0  -19.70   16.10
  18   6   0   -8.70   16.20
  19  -6   0   35.50   22.50
  19  -6   0   42.90   18.40
  19  -6   0   92.49   21.70
 -19  -6   0   77.29   21.10
  19   6   0   57.19   19.30
  19   6   0   69.59   20.90
  19   6   0   67.99   18.40
 -19   6   0   66.99   20.50
  20  -6   0  137.09   21.90
 -20  -6   0  210.08   27.90
  20  -6   0  175.48   26.90
  20  -6   0  165.88   26.00
 -20  -6   0  180.98   24.60
  20  -6   0  182.88   26.70
  20   6   0  223.08   28.80
  20   6   0  184.58   24.40
 -20   6   0  202.38   27.80
  20   6   0  191.78   26.20
  20   6   0  188.98   26.90
 -21  -6   0   63.19   19.90
 -21  -6   0   51.99   22.30
  21  -6   0   61.69   18.10
  21  -6   0   81.39   22.40
  21  -6   0   32.70   21.30
  21  -6   0   49.60   17.90
  21   6   0   94.99   24.00
  21   6   0   45.90   17.20
  21   6   0   41.80   20.10
  21   6   0   59.39   22.70
  22  -6   0   35.80   23.40
  22  -6   0   36.00   21.70
 -22  -6   0   24.60   20.90
 -22  -6   0   31.90   19.20
  22  -6   0   65.59   24.40
  22  -6   0   57.59   20.00
  22   6   0   26.60   21.20
  22   6   0   12.60   21.70
 -22   6   0   25.10   19.60
  22   6   0   24.70   19.50
  22   6   0   11.90   21.60
  23  -6   0  -14.00   21.80
  23  -6   0  -18.70   21.30
  23  -6   0   -1.10   17.80
 -23  -6   0   12.20   20.20
  23  -6   0  -15.70   20.50
 -23  -6   0    9.10   20.00
  23   6   0   10.20   23.00
  23   6   0  -21.20   18.40
  23   6   0  -58.29   20.00
 -23   6   0   -5.80   19.00
  23   6   0    6.50   20.30
   0  -7   0    7.90    7.30
   0  -7   0    3.80    7.50
   0  -7   0    1.40    5.30
   0  -7   0   -4.30    4.40
   0  -7   0   -4.80    8.00
   0  -7   0   -3.70    5.90
   0  -7   0   -9.90    6.70
   0   7   0   -1.40    6.00
   0   7   0    3.10    5.90
   0   7   0    4.40    6.00
   0   7   0    2.60    6.40
   0   7   0    4.50    7.60
   0   7   0   -3.40    6.70
   0   7   0   -7.90    7.00
   0   7   0    8.00    8.10
  -1  -7   0  628.84   27.10
   1  -7   0  588.64   27.30
   1  -7   0  561.44   27.50
   1  -7   0  639.64   26.70
  -1  -7   0  621.44   25.00
  -1  -7   0  609.04   27.20
   1  -7   0  650.03   26.70
   1  -7   0  608.44   27.60
   1  -7   0  626.34   23.90
  -1  -7   0  622.64   27.90
  -1  -7   0  593.54   23.80
  -1  -7   0  618.14   29.10
   1  -7   0  602.14   24.50
  -1  -7   0  621.44   28.20
  -1  -7   0  605.44   27.40
  -1   7   0  602.74   24.00
   1   7   0  605.44   28.30
  -1   7   0  576.74   27.30
  -1   7   0  658.33   29.00
   1   7   0  631.44   27.30
  -1   7   0  603.84   26.90
   1   7   0  621.44   27.60
  -1   7   0  603.34   27.60
  -1   7   0  636.64   25.70
   1   7   0  644.54   26.30
   1   7   0  648.14   28.30
  -1   7   0  632.54   27.70
  -1   7   0  612.74   27.60
   1   7   0  618.04   27.70
   1   7   0  593.64   24.90
   1   7   0  624.84   28.00
  -2  -7   0   78.19    8.50
  -2  -7   0   94.49   11.10
   2  -7   0   96.89   13.00
   2  -7   0   98.89   11.10
  -2  -7   0   80.89   10.60
  -2  -7   0   91.99   11.70
   2  -7   0   80.39   12.20
  -2  -7   0  101.49   13.50
   2  -7   0   97.79   11.80
   2  -7   0  118.39   12.20
  -2  -7   0   78.19    9.70
  -2  -7   0   86.59   12.50
  -2   7   0  106.29   12.50
   2   7   0  101.69   10.90
   2   7   0  107.09   11.40
   2   7   0   80.49   11.70
   2   7   0   80.89   12.40
  -2   7   0  103.09   12.10
  -2   7   0  102.39   10.50
   2   7   0   87.89   10.60
  -2   7   0   78.79   10.70
   2   7   0  103.39   11.70
  -2   7   0   95.59    8.50
  -2   7   0   91.09   11.70
   2   7   0   88.59   11.80
  -2   7   0   83.59   12.60
  -2   7   0   72.39   10.10
  -3  -7   0 2060.89   68.29
   3  -7   0 2221.78   71.69
  -3  -7   0 2064.99   72.59
   3  -7   0 2185.78   73.39
  -3  -7   0 2018.50   72.79
  -3  -7   0 2097.89   72.49
   3  -7   0 2071.79   70.59
  -3  -7   0 2087.59   72.59
   3  -7   0 2114.69   73.79
   3  -7   0 2058.99   72.39
  -3  -7   0 2111.79   71.99
  -3  -7   0 2085.89   70.89
  -3  -7   0 2140.79   74.09
   3   7   0 2143.39   72.29
  -3   7   0 2150.28   73.39
   3   7   0 2159.48   73.69
   3   7   0 2191.08   73.09
   3   7   0 2071.99   68.09
  -3   7   0 2055.69   72.39
  -3   7   0 2218.58   70.29
   3   7   0 2161.58   73.59
   3   7   0 2120.89   70.99
  -3   7   0 2243.58   73.89
  -3   7   0 2110.29   73.39
  -3   7   0 2084.59   71.59
  -3   7   0 2124.09   67.49
   3   7   0 2069.39   71.19
  -3   7   0 2170.68   72.79
   3   7   0 2106.89   73.39
  -4  -7   0  264.47   17.30
   4  -7   0  241.28   17.10
  -4  -7   0  260.87   17.30
   4  -7   0  251.17   18.70
   4  -7   0  274.97   16.30
   4  -7   0  255.27   17.00
  -4  -7   0  253.97   18.10
   4  -7   0  283.87   18.10
  -4  -7   0  253.27   17.80
  -4  -7   0  246.88   14.00
  -4  -7   0  263.47   17.60
  -4  -7   0  261.47   16.40
   4  -7   0  241.98   15.50
  -4  -7   0  271.07   16.70
  -4   7   0  277.57   12.70
  -4   7   0  258.27   16.30
   4   7   0  248.58   15.70
   4   7   0  265.77   13.50
   4   7   0  221.28   16.20
  -4   7   0  291.37   19.00
  -4   7   0  258.07   15.00
   4   7   0  248.78   18.50
   4   7   0  267.37   18.50
   4   7   0  262.27   16.70
  -4   7   0  269.77   18.80
   4   7   0  266.87   16.90
  -4   7   0  263.67   17.30
  -4   7   0  240.48   16.50
   4   7   0  291.77   18.50
   5  -7   0  459.75   21.30
   5  -7   0  375.06   23.30
   5  -7   0  409.46   22.20
  -5  -7   0  415.46   22.60
  -5  -7   0  413.66   21.80
   5  -7   0  403.06   22.60
   5  -7   0  404.46   20.30
  -5  -7   0  449.76   23.70
  -5  -7   0  420.36   21.90
   5  -7   0  377.86   23.60
  -5  -7   0  424.76   23.10
  -5  -7   0  387.26   19.00
  -5  -7   0  379.06   20.90
  -5   7   0  411.16   21.40
  -5   7   0  447.36   17.00
  -5   7   0  443.16   21.20
   5   7   0  420.16   21.70
   5   7   0  474.45   24.40
   5   7   0  427.76   18.70
   5   7   0  420.76   21.20
  -5   7   0  436.56   22.40
  -5   7   0  429.36   20.10
  -5   7   0  382.86   22.80
   5   7   0  429.06   22.20
   5   7   0  482.75   24.60
   5   7   0  457.15   24.20
   5   7   0  435.26   22.20
   6  -7   0  659.03   30.10
   6  -7   0  641.84   27.30
  -6  -7   0  664.13   26.70
   6  -7   0  636.44   28.00
   6  -7   0  644.74   29.80
   6  -7   0  643.14   31.40
  -6  -7   0  637.74   31.50
   6  -7   0  547.05   33.70
  -6  -7   0  664.03   31.70
  -6  -7   0  669.63   30.90
   6  -7   0  636.04   28.10
   6   7   0  667.43   29.50
  -6   7   0  651.73   28.00
  -6   7   0  630.84   29.50
  -6   7   0  678.13   30.60
  -6   7   0  632.14   30.90
  -6   7   0  678.33   27.30
   6   7   0  692.43   30.20
   6   7   0  700.13   30.50
   6   7   0  672.63   31.30
   6   7   0  644.94   28.50
   6   7   0  674.93   26.20
   6   7   0  599.34   29.50
   6   7   0  678.63   31.50
  -6   7   0  643.84   29.50
  -6   7   0  644.24   23.40
   7  -7   0   21.10   11.30
   7  -7   0   38.50    9.00
   7  -7   0   33.40    7.80
  -7  -7   0   29.00    8.50
   7  -7   0    8.20   10.30
  -7  -7   0   38.50    9.80
  -7  -7   0   58.59   10.90
   7  -7   0   32.00    8.70
   7  -7   0   20.00    7.80
  -7  -7   0   37.80    8.50
  -7  -7   0   21.00    8.10
   7  -7   0   18.10   11.10
  -7  -7   0   45.80   10.30
  -7  -7   0   46.00   12.20
  -7   7   0   37.40    9.70
   7   7   0   19.30   10.70
   7   7   0   34.40   11.10
  -7   7   0   45.80    8.60
   7   7   0   41.10   11.10
   7   7   0   35.90   10.10
   7   7   0   19.50   10.20
  -7   7   0   33.10    9.60
  -7   7   0   20.20    9.30
   7   7   0   29.50    7.20
  -7   7   0   48.70    5.90
   7   7   0   32.40    9.50
  -7   7   0   14.00    9.90
  -7   7   0   36.10    5.10
  -8  -7   0  496.05   28.40
   8  -7   0  534.95   29.00
   8  -7   0  525.65   27.20
   8  -7   0  483.95   25.10
  -8  -7   0  502.15   24.00
  -8  -7   0  514.15   26.60
   8  -7   0  534.45   28.30
  -8  -7   0  528.55   26.50
   8  -7   0  494.45   26.40
  -8  -7   0  505.75   27.80
   8  -7   0  498.25   22.70
   8  -7   0  494.65   24.40
  -8  -7   0  488.95   25.80
  -8  -7   0  523.15   25.80
   8   7   0  506.45   27.50
  -8   7   0  515.55   26.00
  -8   7   0  513.65   23.30
  -8   7   0  499.35   25.20
   8   7   0  499.35   26.10
  -8   7   0  519.75   26.10
  -8   7   0  520.75   19.20
   8   7   0  528.15   23.50
   8   7   0  539.75   28.20
   8   7   0  477.35   25.50
   8   7   0  439.46   24.90
  -8   7   0  569.14   28.80
   8   7   0  468.35   26.00
   8   7   0  515.55   26.20
  -9  -7   0   97.89   13.30
  -9  -7   0  107.09   12.00
   9  -7   0  105.09   13.80
   9  -7   0  104.09   16.00
  -9  -7   0  112.09   14.50
  -9  -7   0   82.59   12.90
   9  -7   0   83.59   14.80
   9  -7   0  122.39   17.00
  -9  -7   0   90.39   15.20
   9  -7   0  116.79   11.00
   9  -7   0   79.09   14.70
  -9  -7   0  129.49   19.70
   9  -7   0   75.89   12.10
   9   7   0   98.59   13.20
   9   7   0  132.29   16.70
   9   7   0  101.79   12.00
  -9   7   0  114.49   15.90
  -9   7   0  103.59   13.60
  -9   7   0   94.79    8.20
   9   7   0  117.79   16.40
  -9   7   0  104.99   11.50
   9   7   0  105.39   15.80
   9   7   0  110.09   15.80
   9   7   0  100.59   14.10
  10  -7   0    3.80    9.90
  10  -7   0    2.70    6.20
 -10  -7   0   12.80    8.90
 -10  -7   0    6.70   11.10
 -10  -7   0    6.10   10.50
  10  -7   0    6.50    8.90
  10  -7   0   10.60    9.70
 -10  -7   0    1.10    7.70
  10  -7   0    4.20    8.80
 -10  -7   0   12.60   12.10
  10  -7   0    8.00    8.80
  10   7   0   14.00   10.00
 -10   7   0    6.50    9.40
  10   7   0    9.20   10.90
  10   7   0    5.80   11.50
  10   7   0    3.30   13.20
 -10   7   0   16.60   10.20
  10   7   0   13.30    8.30
  10   7   0   10.70    8.00
 -10   7   0   22.70    7.70
  10   7   0   11.50    9.20
 -10   7   0   -6.30   12.70
  11  -7   0  209.38   21.40
  11  -7   0  203.68   20.10
  11  -7   0  209.98   21.90
 -11  -7   0  185.08   20.70
  11  -7   0  182.38   13.00
  11  -7   0  192.48   21.10
 -11  -7   0  203.38   17.40
 -11  -7   0  206.88   21.60
 -11  -7   0  197.38   17.50
  11  -7   0  223.88   18.20
 -11  -7   0  159.98   18.80
  11   7   0  206.18   20.40
 -11   7   0  207.48   21.30
 -11   7   0  184.98   13.50
 -11   7   0  189.88   11.80
  11   7   0  207.38   18.40
 -11   7   0  197.58   19.40
  11   7   0  250.07   22.70
  11   7   0  190.48   19.90
  11   7   0  191.58   19.50
  12  -7   0  518.15   29.60
  12  -7   0  463.05   20.80
 -12  -7   0  460.35   30.40
 -12  -7   0  484.05   26.70
  12  -7   0  492.15   30.80
  12  -7   0  486.65   27.50
 -12  -7   0  532.05   31.60
 -12  -7   0  496.25   27.60
  12  -7   0  526.05   31.00
  12  -7   0  491.35   28.60
  12   7   0  504.55   33.90
 -12   7   0  467.45   30.30
  12   7   0  473.45   30.50
 -12   7   0  481.15   21.40
  12   7   0  483.15   30.40
  12   7   0  460.95   30.30
  12   7   0  474.55   26.70
  12   7   0  479.35   25.50
  13  -7   0   30.00   14.20
  13  -7   0   40.20   15.70
 -13  -7   0   35.40   15.90
 -13  -7   0   45.80   13.80
 -13  -7   0   51.09   16.70
  13  -7   0   50.09    7.30
  13  -7   0   48.00   16.50
  13  -7   0   58.29   13.50
  13   7   0   50.09   13.40
  13   7   0   59.79   16.10
  13   7   0   54.09   12.70
 -13   7   0   56.89    8.00
 -13   7   0   47.20   15.90
  13   7   0   47.70   12.50
  13   7   0   31.40   15.60
 -14  -7   0  -10.10   10.70
  14  -7   0    2.60   11.40
  14  -7   0    6.10   14.70
  14  -7   0   -5.60   13.80
  14  -7   0   -2.10   14.20
 -14  -7   0   -1.10   14.40
 -14   7   0   -1.50    6.50
  14   7   0    5.10   14.80
  14   7   0   -8.60   10.80
  14   7   0    5.20   13.00
 -14   7   0    1.40    5.30
  14   7   0   -5.80   13.30
 -14   7   0   14.70   13.90
  15  -7   0 1378.56   61.59
 -15  -7   0 1504.25   57.79
  15  -7   0 1408.06   61.39
 -15  -7   0 1433.86   61.79
  15  -7   0 1343.47   58.79
  15  -7   0 1449.65   57.49
 -15   7   0 1475.65   61.89
  15   7   0 1427.16   55.39
 -15   7   0 1402.96   50.09
  15   7   0 1383.06   60.29
 -15   7   0 1437.56   46.00
  15   7   0 1358.96   60.69
  15   7   0 1446.16   59.79
 -16  -7   0  270.07   24.70
  16  -7   0  283.47   40.00
  16  -7   0  242.08   23.40
  16  -7   0  277.57   27.80
 -16  -7   0  209.78   26.10
  16  -7   0  272.77   28.30
  16   7   0  232.58   24.40
 -16   7   0  225.78   16.40
  16   7   0  237.68   24.70
 -16   7   0  255.57   26.90
 -17  -7   0  305.87   30.30
  17  -7   0  294.47   27.70
  17  -7   0  279.07   25.80
  17  -7   0  277.97   29.00
 -17  -7   0  254.37   25.20
  17  -7   0  269.27   29.40
 -17   7   0  237.08   27.80
  17   7   0  246.58   28.40
 -17   7   0  246.48   17.90
  17   7   0  260.57   25.60
  17   7   0  252.47   28.30
  17   7   0  260.27   28.50
 -18  -7   0   29.00   17.80
  18  -7   0   43.90   19.00
  18  -7   0   32.40   19.30
 -18  -7   0   16.90   15.20
  18  -7   0   18.50   14.70
  18  -7   0   -0.80   17.30
  18   7   0    5.50   17.80
 -18   7   0   -0.30   17.40
  18   7   0    9.90   17.20
  18   7   0   17.00   16.70
  18   7   0    7.10   17.30
 -18   7   0   29.70    9.70
  19  -7   0  175.68   25.50
  19  -7   0  201.68   23.80
  19  -7   0  130.29   21.80
 -19  -7   0  163.58   26.20
  19  -7   0  163.88   26.50
  19   7   0  164.18   25.80
  19   7   0  125.69   24.20
 -19   7   0  110.99   15.20
  19   7   0  110.49   21.20
 -19   7   0  221.88   28.70
  19   7   0  145.19   22.30
 -20  -7   0   30.20   18.10
  20  -7   0   40.70   21.80
  20  -7   0   22.80   16.70
  20  -7   0   32.60   16.20
  20  -7   0   46.00   21.50
  20   7   0   39.30   20.70
  20   7   0   26.40   18.20
 -20   7   0   28.10   20.70
  20   7   0  -12.30   18.80
  20   7   0   23.00   17.80
 -21  -7   0  138.59   23.60
 -21  -7   0  173.08   28.60
  21  -7   0  146.09   23.40
  21  -7   0  147.39   28.00
  21  -7   0  132.99   28.20
  21  -7   0  164.38   27.50
 -21   7   0  130.79   26.70
  21   7   0  123.49   26.50
  21   7   0  195.68   26.00
  21   7   0  156.88   24.60
  21   7   0  171.48   28.50
  22  -7   0   89.99   26.70
  22  -7   0   87.89   21.90
 -22  -7   0  123.69   24.70
 -22  -7   0   79.79   24.30
  22  -7   0  152.98   28.70
  22   7   0   63.69   30.30
  22   7   0  189.18   30.30
 -22   7   0  107.29   27.20
  22   7   0  148.39   24.40
   0  -8   0  803.62   32.90
   0  -8   0  821.82   36.00
   0  -8   0  783.72   29.90
   0  -8   0  788.32   35.00
   0  -8   0  748.93   29.80
   0  -8   0  791.12   34.00
   0   8   0  706.63   36.30
   0   8   0  756.42   37.80
   0   8   0  823.52   31.90
   0   8   0  795.12   33.40
   0   8   0  797.12   35.00
   0   8   0  788.72   30.60
   0   8   0  754.32   33.70
   1  -8   0  288.37   22.30
  -1  -8   0  287.37   17.30
   1  -8   0  285.17   15.80
  -1  -8   0  285.97   18.60
   1  -8   0  316.47   17.90
  -1  -8   0  294.57   19.00
  -1  -8   0  300.07   15.40
   1  -8   0  296.87   20.80
  -1  -8   0  310.87   19.00
  -1  -8   0  308.67   21.10
   1  -8   0  278.47   15.00
   1  -8   0  294.67   18.10
  -1  -8   0  297.97   16.60
   1  -8   0  289.77   19.20
  -1   8   0  255.07   19.70
  -1   8   0  272.87   19.00
   1   8   0  298.77   18.70
   1   8   0  272.17   29.80
  -1   8   0  268.77   18.50
  -1   8   0  308.97   19.50
   1   8   0  299.17   19.30
   1   8   0  294.07   18.10
  -1   8   0  303.67   15.60
  -1   8   0  239.08   18.90
   1   8   0  249.38   16.60
  -1   8   0  301.87   22.80
   1   8   0  280.87   16.60
  -1   8   0  260.07   16.10
   2  -8   0  230.18   17.40
  -2  -8   0  203.08   14.40
  -2  -8   0  211.88   18.60
   2  -8   0  237.08   16.70
  -2  -8   0  234.18   13.80
   2  -8   0  242.98   14.50
  -2  -8   0  266.67   20.30
   2  -8   0  230.78   19.10
  -2  -8   0  232.18   17.80
   2  -8   0  171.08   21.10
  -2  -8   0  250.87   17.80
  -2  -8   0  224.08   18.30
   2  -8   0  273.17   17.00
  -2   8   0  235.98   18.80
  -2   8   0  248.58   17.80
  -2   8   0  249.48   19.70
  -2   8   0  195.58   16.80
   2   8   0  237.88   15.90
  -2   8   0  219.68   17.20
   2   8   0  238.78   18.80
  -2   8   0  251.67   15.40
   2   8   0  214.08   19.20
   2   8   0  230.98   15.40
   2   8   0  229.98   22.30
   2   8   0  229.18   17.20
  -2   8   0  234.28   13.20
  -3  -8   0  319.47   22.90
   3  -8   0  353.86   20.80
   3  -8   0  356.26   19.80
  -3  -8   0  331.47   16.70
   3  -8   0  351.26   19.60
  -3  -8   0  380.96   21.70
  -3  -8   0  333.17   22.90
  -3  -8   0  339.97   18.80
  -3  -8   0  349.77   20.00
   3  -8   0  367.76   23.10
  -3  -8   0  322.47   21.50
  -3  -8   0  316.87   20.40
   3   8   0  334.17   21.70
  -3   8   0  321.37   20.10
   3   8   0  327.67   19.50
  -3   8   0  373.26   21.00
  -3   8   0  347.07   18.30
  -3   8   0  329.47   19.30
   3   8   0  348.87   21.60
  -3   8   0  343.77   15.90
   3   8   0  354.96   22.10
   3   8   0  295.57   21.60
  -3   8   0  335.07   20.30
  -3   8   0  358.46   24.70
   3   8   0  322.77   19.70
  -3   8   0  327.07   19.50
   3   8   0  347.77   21.80
  -4  -8   0  302.57   19.40
   4  -8   0  302.17   20.10
  -4  -8   0  318.87   19.90
  -4  -8   0  302.57   18.20
   4  -8   0  317.47   18.80
  -4  -8   0  279.37   21.40
  -4  -8   0  305.07   19.10
   4  -8   0  303.07   21.80
   4  -8   0  306.87   18.40
   4  -8   0  282.07   20.80
  -4  -8   0  299.77   16.00
   4   8   0  313.47   19.00
  -4   8   0  279.27   18.90
  -4   8   0  258.27   20.20
   4   8   0  308.97   20.40
   4   8   0  298.57   18.90
   4   8   0  294.27   20.90
  -4   8   0  342.97   21.60
   4   8   0  278.57   17.80
   4   8   0  328.37   21.10
  -4   8   0  283.97   14.10
   4   8   0  301.87   15.40
   4   8   0  306.97   19.70
  -4   8   0  322.87   18.80
  -4   8   0  329.77   17.50
  -4   8   0  304.17   19.20
  -4   8   0  308.67   19.60
   5  -8   0   62.19   10.00
   5  -8   0   70.39   13.30
   5  -8   0   51.99   12.60
   5  -8   0   71.59   11.20
  -5  -8   0   41.70   10.60
  -5  -8   0   74.39   11.50
  -5  -8   0   55.09    8.70
   5  -8   0   64.79   13.60
  -5  -8   0   60.49   12.80
  -5  -8   0   60.79   11.80
  -5  -8   0   48.20   11.60
   5  -8   0   81.19   12.90
  -5   8   0   42.30   10.50
  -5   8   0   60.49   12.10
   5   8   0   59.39   12.70
   5   8   0   84.69   14.20
  -5   8   0   53.09   11.70
   5   8   0   51.49   12.10
   5   8   0   56.69   10.90
  -5   8   0   54.59    6.70
   5   8   0   67.79   11.40
  -5   8   0   53.69    9.00
  -5   8   0   62.39   11.20
   5   8   0   58.89   11.10
   5   8   0   60.49    8.20
  -5   8   0   76.79   13.50
   6  -8   0  813.42   38.30
  -6  -8   0  809.42   32.50
  -6  -8   0  833.22   36.10
   6  -8   0  790.42   36.90
  -6  -8   0  800.32   36.10
   6  -8   0  857.51   38.20
   6  -8   0  803.72   34.30
  -6  -8   0  838.72   36.50
  -6  -8   0  800.22   36.50
  -6  -8   0  839.52   42.60
   6  -8   0  833.12   34.30
   6  -8   0  921.01   40.30
   6  -8   0  861.51   34.50
  -6  -8   0  847.02   35.90
   6   8   0  821.32   36.80
   6   8   0  838.02   35.30
   6   8   0  817.42   38.10
  -6   8   0  843.82   29.30
  -6   8   0  841.02   36.80
   6   8   0  832.92   35.70
  -6   8   0  814.82   36.00
  -6   8   0  835.42   33.40
   6   8   0  892.71   32.20
   6   8   0  854.91   37.10
   6   8   0  864.01   38.20
   6   8   0  823.22   35.90
  -6   8   0  858.91   36.80
  -6   8   0  846.82   34.50
  -7  -8   0   70.69   14.10
   7  -8   0   87.99   13.90
   7  -8   0  128.49   13.80
  -7  -8   0  144.39   16.50
  -7  -8   0  121.29   17.50
   7  -8   0  114.99   13.70
  -7  -8   0  136.19   14.90
  -7  -8   0  141.29   16.00
  -7  -8   0  122.89   14.90
   7  -8   0  125.59   15.50
   7  -8   0   95.69   16.10
   7  -8   0  107.09   12.10
  -7  -8   0  111.89   12.20
   7  -8   0  109.79   17.10
   7   8   0  120.69   16.20
  -7   8   0  114.39   18.40
   7   8   0  120.99   11.40
  -7   8   0  132.59   13.20
  -7   8   0  104.19    8.30
   7   8   0  102.19   15.90
   7   8   0  118.29   15.60
  -7   8   0  121.09   13.60
  -7   8   0  113.59    8.00
   7   8   0   86.49   14.20
  -7   8   0  123.99   15.10
   7   8   0  115.99   14.60
  -7   8   0  133.29   15.20
   7   8   0  123.29   15.70
  -8  -8   0  352.56   19.50
   8  -8   0  316.67   24.40
   8  -8   0  342.27   19.60
  -8  -8   0  391.76   25.40
  -8  -8   0  375.76   25.60
   8  -8   0  312.87   22.30
   8  -8   0  341.67   21.00
   8  -8   0  339.37   25.40
  -8  -8   0  355.56   23.90
   8  -8   0  376.06   25.00
  -8   8   0  360.66   15.40
   8   8   0  316.27   21.20
   8   8   0  384.26   22.70
   8   8   0  360.66   22.90
   8   8   0  329.27   24.40
   8   8   0  360.66   25.10
  -8   8   0  385.76   25.40
  -8   8   0  383.36   20.80
   8   8   0  383.66   23.50
  -8   8   0  361.56   14.80
   8   8   0  384.36   19.30
  -8   8   0  327.67   21.70
  -9  -8   0   14.60    9.20
   9  -8   0   15.20   10.10
   9  -8   0   19.00   13.70
   9  -8   0   -3.20   12.20
   9  -8   0    3.40   11.70
   9  -8   0   -5.40    8.70
  -9  -8   0    5.30   10.50
  -9  -8   0   -1.60    9.70
   9  -8   0   15.10    7.50
   9  -8   0   14.70   10.60
  -9  -8   0    9.30   11.90
   9   8   0   28.80   12.70
  -9   8   0    0.80    4.80
   9   8   0    8.10   13.60
   9   8   0    1.50    7.70
  -9   8   0    2.00    4.40
  -9   8   0    8.30    7.80
  -9   8   0   12.90    8.30
   9   8   0   -1.20   10.90
   9   8   0   15.90   10.80
  -9   8   0   19.60   13.30
   9   8   0   16.40   12.40
  10  -8   0  169.28   18.90
 -10  -8   0  211.38   21.50
 -10  -8   0  214.38   21.20
  10  -8   0  199.78   18.10
  10  -8   0  211.18   14.80
 -10  -8   0  186.48   21.90
 -10  -8   0  180.08   16.40
  10  -8   0  217.58   22.10
  10  -8   0  202.48   22.50
  10  -8   0  215.78   22.60
  10   8   0  210.18   15.40
  10   8   0  192.18   20.90
 -10   8   0  192.48   15.30
  10   8   0  217.08   19.20
  10   8   0  219.28   22.60
 -10   8   0  179.88   11.40
 -10   8   0  185.98   11.80
 -10   8   0  182.08   20.40
 -10   8   0  223.18   17.30
  10   8   0  196.28   21.10
  10   8   0  157.78   19.30
  11  -8   0  942.21   40.60
  11  -8   0  950.00   44.90
  11  -8   0  976.30   36.90
  11  -8   0  988.50   46.10
  11  -8   0  913.51   45.10
 -11  -8   0  983.10   46.00
 -11  -8   0  973.70   47.60
 -11  -8   0  929.31   42.50
 -11  -8   0  998.80   45.40
 -11   8   0  956.70   45.10
 -11   8   0  986.00   37.30
  11   8   0  960.60   44.10
  11   8   0  930.71   43.30
  11   8   0  945.51   42.50
  11   8   0  950.40   39.20
 -11   8   0  990.50   40.10
  11   8   0  957.80   44.90
  12  -8   0  167.38   13.50
  12  -8   0  148.59   19.00
  12  -8   0  189.18   22.50
 -12  -8   0  177.48   19.70
 -12  -8   0  214.28   19.30
  12  -8   0  190.98   23.00
 -12  -8   0  184.68   21.90
  12  -8   0  194.48   18.80
  12   8   0  154.38   21.50
 -12   8   0  183.08   11.90
 -12   8   0  167.08   14.30
  12   8   0  191.68   17.20
  12   8   0  148.09   20.30
  12   8   0  171.98   21.20
  12   8   0  150.88   18.40
 -12   8   0  165.48   21.90
 -13  -8   0   36.90   13.40
  13  -8   0   26.60   16.20
 -13  -8   0   47.40   13.60
 -13  -8   0   43.40   16.70
  13  -8   0   27.40   12.60
  13  -8   0   38.00   17.60
  13  -8   0   36.40   13.30
  13  -8   0   46.50    8.20
 -13   8   0   15.40   16.00
  13   8   0   46.80   15.70
 -13   8   0   38.90    9.10
  13   8   0   59.29   14.20
  13   8   0   42.30   13.50
  13   8   0   39.70   15.10
  14  -8   0   28.20   13.70
  14  -8   0   23.30    6.80
 -14  -8   0   25.00   15.60
  14  -8   0   14.20   16.80
  14  -8   0   27.80   16.00
  14  -8   0   12.60   12.80
 -14  -8   0    2.60   11.50
 -14  -8   0   23.70   12.70
 -14   8   0   21.80   16.50
  14   8   0   42.80   16.90
  14   8   0    6.80   15.20
 -14   8   0   18.40    7.40
  14   8   0   22.70   14.80
  14   8   0    8.20   12.60
  15  -8   0  372.46   31.30
  15  -8   0  373.46   33.10
  15  -8   0  389.86   38.50
 -15  -8   0  327.37   31.20
  15  -8   0  394.96   27.40
 -15  -8   0  434.56   27.60
 -15   8   0  408.66   30.90
 -15   8   0  355.26   17.60
  15   8   0  425.46   27.70
  15   8   0  375.16   31.50
 -15   8   0  361.26   18.70
  15   8   0  397.86   28.50
 -16  -8   0   40.50   19.20
  16  -8   0   12.60   17.60
  16  -8   0   58.89   15.60
 -16  -8   0   90.59   17.10
  16  -8   0   46.20   18.90
  16  -8   0   31.60   14.60
  16   8   0   53.29   14.90
 -16   8   0   49.30    9.50
 -16   8   0   44.00    6.10
  16   8   0   57.09   18.90
 -16   8   0   49.60   19.50
  16   8   0   52.69   15.80
  16   8   0   16.50   16.90
  17  -8   0   68.19   21.60
  17  -8   0  110.79   19.00
  17  -8   0  101.19   19.80
 -17  -8   0  103.19   18.50
 -17  -8   0   68.49   21.40
  17  -8   0   57.09   20.50
  17   8   0   60.69   20.30
 -17   8   0   77.49   10.80
  17   8   0   87.19   21.40
  17   8   0  106.29   19.50
 -17   8   0  117.89   22.60
  18  -8   0  162.68   25.90
  18  -8   0  145.69   23.80
 -18  -8   0  169.58   25.70
  18  -8   0  178.58   27.10
 -18  -8   0  182.18   23.70
  18  -8   0  179.78   26.90
  18   8   0  129.59   21.50
 -18   8   0  196.08   26.60
  18   8   0  181.38   26.40
  18   8   0  207.68   33.10
 -18   8   0  159.58   14.40
  18   8   0  154.48   25.10
  19  -8   0   94.09   20.10
  19  -8   0   73.89   23.10
  19  -8   0  150.68   26.20
  19  -8   0   74.09   23.60
 -19  -8   0   98.39   20.00
  19   8   0  166.28   45.00
  19   8   0  100.99   24.70
  19   8   0   81.59   23.40
  19   8   0   91.59   21.50
 -19   8   0   95.39   23.70
 -20  -8   0   53.49   22.90
  20  -8   0    3.30   15.70
  20  -8   0   22.10   21.30
  20  -8   0   24.10   22.30
  20  -8   0   28.80   21.10
 -20  -8   0   53.39   19.20
  20   8   0   54.19   22.30
  20   8   0   48.20   19.00
  20   8   0   28.30   21.20
  20   8   0   56.59   22.90
 -20   8   0   32.40   20.20
  21  -8   0  120.79   22.60
  21  -8   0   98.89   27.70
  21  -8   0  146.59   28.80
  21  -8   0  144.99   27.70
 -21  -8   0  110.49   23.80
 -21  -8   0  173.88   29.70
 -21   8   0  108.19   25.60
  21   8   0   97.29   23.20
  21   8   0  207.98   30.60
  21   8   0  119.59   30.40
  22  -8   0   21.70   24.80
  22  -8   0   27.20   19.40
  22  -8   0    8.00   23.10
 -22  -8   0   49.40   24.90
 -22   8   0   49.99   22.70
  22   8   0   29.50   24.20
  22   8   0   56.39   20.40
   0  -9   0    1.90    5.90
   0  -9   0    6.00   10.20
   0  -9   0    1.60    8.30
   0  -9   0   -5.70    6.40
   0  -9   0   -8.70   10.40
   0  -9   0   -4.60    6.20
   0  -9   0   -9.70   10.70
   0   9   0   10.30    9.90
   0   9   0    5.70    6.50
   0   9   0    3.60    7.00
   0   9   0   13.50   11.10
   0   9   0   -7.00    5.90
   0   9   0  -11.90    9.60
   0   9   0   -4.90    6.50
   0   9   0    3.90    7.30
   1  -9   0    6.30    8.30
   1  -9   0    5.30    9.40
   1  -9   0   -6.30    8.10
  -1  -9   0    7.10    6.40
   1  -9   0   14.00    6.50
   1  -9   0   -3.50    6.80
  -1  -9   0    8.10    9.10
  -1  -9   0   12.60    9.00
   1  -9   0   15.80   11.80
  -1  -9   0    9.80    9.10
  -1  -9   0    8.30    8.50
  -1  -9   0   25.90   11.60
   1  -9   0   11.90   11.20
  -1  -9   0   10.60    6.90
  -1   9   0   12.60    7.30
   1   9   0    3.00    6.70
   1   9   0   16.70   10.40
   1   9   0    7.10   10.20
  -1   9   0   10.10   11.40
   1   9   0   -1.10    7.20
  -1   9   0   -1.10    6.70
   1   9   0    8.80    8.00
  -1   9   0    1.50    7.80
   1   9   0    9.70    8.40
  -1   9   0    2.40    8.10
  -1   9   0    9.10    7.70
   1   9   0   12.60    8.60
  -1   9   0    8.80    9.80
   1   9   0    8.20    7.60
   2  -9   0  277.97   18.90
  -2  -9   0  219.98   19.10
   2  -9   0  269.97   16.00
  -2  -9   0  273.07   21.20
   2  -9   0  252.87   21.50
  -2  -9   0  282.97   22.40
  -2  -9   0  267.67   19.70
   2  -9   0  245.98   18.40
  -2  -9   0  238.38   16.80
   2  -9   0  262.07   19.70
  -2  -9   0  249.18   15.10
   2  -9   0  282.27   22.20
  -2   9   0  221.58   19.10
  -2   9   0  262.17   21.00
  -2   9   0  236.68   20.40
  -2   9   0  243.08   17.60
   2   9   0  261.87   18.00
  -2   9   0  259.77   19.00
   2   9   0  265.77   17.10
   2   9   0  257.27   20.50
  -2   9   0  266.37   15.10
   2   9   0  259.17   18.40
   2   9   0  262.27   19.10
   2   9   0  239.58   19.30
   2   9   0  265.27   19.20
   3  -9   0  119.09   16.00
  -3  -9   0   83.19   14.00
  -3  -9   0  107.59   12.80
   3  -9   0   58.99   14.50
  -3  -9   0   98.89   10.60
  -3  -9   0  106.89   14.60
   3  -9   0   76.29   13.00
  -3  -9   0  106.89   16.40
   3  -9   0  111.79   13.60
   3  -9   0  118.19   13.80
  -3  -9   0   82.69   14.60
  -3   9   0  107.79   14.00
   3   9   0  105.19   15.70
  -3   9   0  108.79    9.90
   3   9   0   81.59   12.50
   3   9   0  109.09   14.30
   3   9   0  104.79   14.70
  -3   9   0   76.99   13.60
   3   9   0  103.29   13.00
   3   9   0  104.79   13.20
  -3   9   0   86.39   13.50
  -3   9   0   81.29   13.20
  -3   9   0   84.69   14.90
   3   9   0   82.79   13.40
   4  -9   0   -2.00    9.40
   4  -9   0   -2.10   11.40
  -4  -9   0   17.10   10.90
   4  -9   0   -0.40    7.60
  -4  -9   0   13.20   11.20
  -4  -9   0    3.30    9.70
  -4  -9   0  -13.80    7.70
   4  -9   0   -5.60   10.40
  -4  -9   0   11.20    7.90
  -4  -9   0   -3.80    6.50
  -4  -9   0   -2.60    7.20
   4  -9   0   17.70    9.40
   4  -9   0    6.50   11.40
   4   9   0    1.90   10.70
   4   9   0    1.80   10.90
  -4   9   0   -6.60    9.10
  -4   9   0   -2.20    8.40
   4   9   0    1.70    8.70
  -4   9   0   12.70    9.50
   4   9   0   -5.10    8.90
   4   9   0   -1.60    8.30
   4   9   0    6.10    9.00
  -4   9   0    3.10   11.10
   4   9   0   -0.80    9.50
  -4   9   0    6.20   10.50
  -4   9   0   -3.80    5.30
   5  -9   0  312.57   21.90
   5  -9   0  319.87   19.70
   5  -9   0  297.77   21.60
  -5  -9   0  293.27   19.80
  -5  -9   0  335.47   24.50
  -5  -9   0  293.37   22.50
  -5  -9   0  289.97   21.60
  -5  -9   0  312.47   17.50
   5  -9   0  325.57   23.70
  -5   9   0  300.87   14.90
   5   9   0  312.87   16.60
   5   9   0  320.27   22.70
  -5   9   0  320.57   23.10
  -5   9   0  330.27   21.60
   5   9   0  290.97   22.90
  -5   9   0  337.47   20.50
  -5   9   0  298.17   20.60
   5   9   0  295.27   20.90
  -5   9   0  279.97   22.80
  -5   9   0  303.57   18.50
   5   9   0  292.97   22.20
   5   9   0  335.77   21.80
   5   9   0  330.07   21.00
   6  -9   0   79.39   13.40
  -6  -9   0   96.39   13.60
   6  -9   0  101.39   13.00
   6  -9   0   96.49   13.70
   6  -9   0   62.89   15.60
   6  -9   0   80.59   14.90
  -6  -9   0   60.09   10.20
  -6  -9   0   87.09   13.40
   6  -9   0   78.19   13.70
  -6  -9   0   79.59   16.40
  -6  -9   0   70.19   14.80
   6  -9   0   81.59   12.80
   6   9   0   84.69   15.60
   6   9   0   64.49   13.80
  -6   9   0   96.99   14.80
  -6   9   0   76.99   13.50
  -6   9   0  107.49   16.30
  -6   9   0   70.29    7.50
   6   9   0   67.99   13.40
   6   9   0   79.69   14.50
  -6   9   0   85.39   11.60
   6   9   0   84.09   13.60
   6   9   0   69.79    9.30
   7  -9   0   -0.50   11.60
  -7  -9   0   22.50   12.50
   7  -9   0    2.90   11.70
   7  -9   0   -5.70    8.90
  -7  -9   0    5.50   13.00
   7  -9   0   -0.50    7.40
  -7  -9   0   -4.30    8.00
   7  -9   0    1.70    8.20
  -7  -9   0   14.90   11.00
   7  -9   0   -9.90    9.20
   7  -9   0   -9.30    8.70
   7   9   0    4.00   10.70
   7   9   0   -2.70    6.90
  -7   9   0    1.60   10.00
  -7   9   0    9.40    4.50
  -7   9   0   10.60   11.30
  -7   9   0    6.40    5.00
   7   9   0    5.60    9.10
  -7   9   0    2.50   10.70
   7   9   0    2.20    9.20
   7   9   0   15.10   12.40
  -7   9   0    4.70   10.20
  -7   9   0    6.80    7.80
   7   9   0    6.70   10.20
  -8  -9   0  420.76   25.70
  -8  -9   0  516.75   29.80
   8  -9   0  423.86   26.70
   8  -9   0  449.16   29.30
   8  -9   0  385.16   24.30
  -8  -9   0  446.16   30.00
   8  -9   0  462.25   30.40
  -8  -9   0  481.95   23.50
   8  -9   0  449.46   25.00
   8  -9   0  461.05   27.60
   8   9   0  486.25   29.50
  -8   9   0  467.65   28.90
   8   9   0  428.06   25.50
  -8   9   0  447.46   17.60
  -8   9   0  443.66   18.10
  -8   9   0  445.96   26.70
   8   9   0  462.65   27.70
  -8   9   0  482.35   24.40
   8   9   0  411.26   21.60
  -9  -9   0  214.98   23.50
  -9  -9   0  213.78   19.00
   9  -9   0  213.58   23.20
   9  -9   0  226.58   22.00
   9  -9   0  263.57   19.80
   9  -9   0  193.08   21.30
  -9  -9   0  212.58   17.80
   9  -9   0  219.18   18.50
  -9  -9   0  231.98   22.50
   9   9   0  224.38   16.20
  -9   9   0  212.58   17.80
  -9   9   0  206.78   11.60
   9   9   0  259.37   21.00
   9   9   0  226.18   21.70
  -9   9   0  234.08   20.50
   9   9   0  252.87   22.50
  -9   9   0  209.58   11.10
   9   9   0  206.08   22.20
  -9   9   0  245.88   23.30
  10  -9   0   15.60   11.50
 -10  -9   0   29.60   10.00
  10  -9   0   39.30   14.70
 -10  -9   0   22.60   14.60
 -10  -9   0   19.30   14.80
  10  -9   0   30.80    8.60
  10  -9   0   40.10   16.70
 -10  -9   0    8.10   14.60
  10  -9   0   16.80   14.70
 -10   9   0   32.00   10.30
  10   9   0   22.90   12.10
 -10   9   0   22.40    5.40
 -10   9   0   23.00    5.70
  10   9   0   18.30    8.80
 -10   9   0   15.80   13.60
  10   9   0    6.80   14.30
  10   9   0   37.10   14.70
  10   9   0   26.40   11.20
  11  -9   0  111.39   20.50
 -11  -9   0  108.79   18.70
  11  -9   0  104.19   19.60
  11  -9   0  105.59   16.70
  11  -9   0   92.89   15.60
  11  -9   0  101.89   12.20
 -11  -9   0  126.19   15.20
 -11  -9   0  115.79   19.40
  11   9   0  167.68   21.20
  11   9   0   77.79   18.10
 -11   9   0   91.39    9.30
 -11   9   0  120.09   19.60
 -11   9   0  100.29   12.90
  11   9   0  118.79   20.40
 -11   9   0   96.09    8.30
  11   9   0   94.79   13.10
  11   9   0  110.89   17.50
  12  -9   0  375.86   31.60
  12  -9   0  411.56   31.20
 -12  -9   0  408.46   30.60
 -12  -9   0  387.06   25.30
 -12  -9   0  374.36   30.90
  12  -9   0  393.86   21.20
  12  -9   0  389.76   25.70
  12  -9   0  440.66   31.60
  12   9   0  378.16   23.60
 -12   9   0  380.16   22.10
 -12   9   0  399.06   27.70
  12   9   0  403.66   29.90
  12   9   0  382.66   27.30
 -12   9   0  392.46   17.10
  12   9   0  423.66   30.90
  12   9   0  398.76   27.40
 -13  -9   0   77.99   18.70
  13  -9   0   92.09   17.10
  13  -9   0  118.89   12.60
  13  -9   0   96.89   21.10
  13  -9   0  138.39   21.40
 -13  -9   0   82.79   18.50
  13  -9   0   70.19   20.10
 -13  -9   0  134.49   17.20
 -13   9   0  109.89   11.60
  13   9   0  112.19   17.10
 -13   9   0  104.69   12.50
 -13   9   0   97.59    8.90
 -13   9   0  107.79   18.20
  13   9   0   73.89   20.00
  13   9   0  103.59   19.90
  13   9   0  107.49   20.20
 -14  -9   0   57.09   19.60
  14  -9   0   60.49    9.60
  14  -9   0   66.89   17.30
  14  -9   0   33.30   18.10
 -14  -9   0   53.29   14.50
 -14  -9   0   28.90   17.50
  14  -9   0   83.39   15.80
 -14   9   0   52.99    9.70
 -14   9   0   40.70   17.10
  14   9   0   39.10   17.20
  14   9   0   74.09   17.30
  14   9   0   68.59   18.90
  14   9   0   44.00   14.90
  15  -9   0   62.99   16.30
 -15  -9   0   55.49   15.90
  15  -9   0   39.80   14.90
  15  -9   0   26.10    7.30
 -15  -9   0   49.90   19.50
  15  -9   0   55.89   18.10
  15  -9   0   32.60   19.80
 -15   9   0   48.00    9.00
  15   9   0   68.49   19.50
  15   9   0   41.10   18.00
  15   9   0   51.69   15.80
  15   9   0   29.30   14.30
 -15   9   0   22.10   18.40
  16  -9   0  147.39   25.30
 -16  -9   0  142.19   24.20
  16  -9   0  178.08   25.90
  16  -9   0  166.48   22.20
  16  -9   0  186.88   26.40
 -16  -9   0  172.18   21.20
 -16   9   0  136.69   24.10
  16   9   0  179.28   25.80
  16   9   0  163.48   21.50
  16   9   0  203.38   26.10
 -16   9   0  166.88   12.60
  16   9   0  203.98   27.20
 -17  -9   0   -9.40   14.40
 -17  -9   0    0.10   16.40
  17  -9   0    6.90   18.00
  17  -9   0    0.70   18.60
  17  -9   0   10.50   14.50
  17  -9   0   -6.90   15.10
 -17   9   0   -0.60   18.20
 -17   9   0    2.40    7.40
  17   9   0  -28.10   16.30
  17   9   0    4.60   14.90
  17   9   0   21.50   18.60
  17   9   0  -13.70   20.40
  18  -9   0   25.60   22.70
 -18  -9   0   61.49   21.20
  18  -9   0   80.09   23.30
 -18  -9   0   13.50   16.10
  18  -9   0   25.60   16.20
  18  -9   0   30.00   19.90
  18   9   0   42.80   20.80
 -18   9   0   46.00   20.80
  18   9   0   60.79   19.90
  18   9   0   42.90   21.20
  19  -9   0  -22.50   16.90
  19  -9   0  -28.40   21.10
  19  -9   0    8.80   20.30
 -19  -9   0   33.30   20.60
  19  -9   0   -6.00   15.60
 -19  -9   0  -21.70   13.40
  19   9   0  -12.50   19.10
  19   9   0    1.30   17.70
  19   9   0   -2.90   17.00
 -19   9   0  -15.00   18.00
  19   9   0   20.60   21.10
  20  -9   0  337.27   36.60
 -20  -9   0  205.68   30.80
 -20  -9   0  318.97   30.80
  20  -9   0  302.87   36.10
  20  -9   0  300.37   29.70
  20  -9   0  271.07   33.30
 -20   9   0  283.27   33.50
  20   9   0  304.47   38.00
  20   9   0  289.67   34.60
  20   9   0  226.88   32.10
  20   9   0  238.98   29.10
  21  -9   0   50.39   25.00
  21  -9   0    0.20   18.10
 -21  -9   0   13.30   18.80
 -21  -9   0  -22.00   19.50
  21  -9   0   24.70   23.50
  21  -9   0  -12.30   22.40
  21   9   0    2.50   20.90
  21   9   0   16.70   19.30
  21   9   0  -25.40   26.30
 -21   9   0   48.90   24.40
  21   9   0   -8.50   22.30
   0 -10   0 1552.94   54.09
   0 -10   0 1533.85   60.79
   0 -10   0 1478.55   54.09
   0 -10   0 1572.24   60.69
   0 -10   0 1595.34   58.19
   0  10   0 1481.55   59.19
   0  10   0 1520.65   59.69
   0  10   0 1543.15   59.89
   0  10   0 1559.34   58.89
   0  10   0 1564.54   56.49
   0  10   0 1573.94   54.89
  -1 -10   0    3.50   12.10
   1 -10   0   21.00    8.60
   1 -10   0    1.60    9.50
  -1 -10   0   18.30   10.70
   1 -10   0    1.20    9.30
  -1 -10   0   22.10    7.90
  -1 -10   0   -8.10    9.30
   1 -10   0   12.60    7.10
   1 -10   0   25.30   11.40
  -1 -10   0   12.30    7.50
   1  10   0    8.10    7.90
  -1  10   0   13.30   11.60
  -1  10   0    6.10   10.90
   1  10   0   24.10   11.90
   1  10   0   28.10   13.60
  -1  10   0   19.00   12.40
  -1  10   0    3.40    7.40
  -1  10   0   15.60    8.60
   1  10   0    3.90   11.80
   1  10   0   20.10   12.30
   1  10   0   11.10    8.20
  -1  10   0   19.50   10.00
  -2 -10   0    2.40    7.10
   2 -10   0    2.10   12.60
   2 -10   0    2.10   10.00
   2 -10   0   11.50   12.80
  -2 -10   0    5.70    7.40
  -2 -10   0   18.00   11.00
  -2 -10   0   42.50   13.20
   2 -10   0    3.20    8.00
  -2 -10   0    9.60   10.30
   2  10   0    1.40   11.30
  -2  10   0    9.30    8.00
   2  10   0    9.80    9.20
  -2  10   0    4.30   10.50
   2  10   0   21.20   10.20
  -2  10   0   -0.20    8.40
  -2  10   0   15.70   10.70
  -2  10   0   22.40   12.70
   2  10   0  -10.60   10.90
   2  10   0   13.90   11.20
  -2  10   0   -9.30    6.60
   3 -10   0  518.25   31.00
  -3 -10   0  485.85   22.60
   3 -10   0  485.55   26.40
  -3 -10   0  471.05   27.10
  -3 -10   0  457.95   28.00
  -3 -10   0  448.56   26.80
  -3 -10   0  476.75   24.50
   3 -10   0  447.66   27.50
   3 -10   0  480.05   24.40
  -3 -10   0  426.66   27.30
   3  10   0  438.66   25.90
   3  10   0  546.35   30.60
   3  10   0  448.86   28.20
   3  10   0  487.25   26.90
  -3  10   0  432.66   28.60
  -3  10   0  461.45   27.40
   3  10   0  514.75   30.00
  -3  10   0  420.76   26.40
  -3  10   0  461.15   21.40
  -3  10   0  471.45   24.00
  -3  10   0  512.65   29.50
   4 -10   0  780.22   33.90
  -4 -10   0  715.13   32.40
   4 -10   0  752.32   36.50
  -4 -10   0  710.73   34.50
   4 -10   0  683.33   37.10
  -4 -10   0  674.43   29.40
  -4 -10   0  695.83   35.90
  -4 -10   0  721.03   35.20
  -4 -10   0  719.03   36.00
  -4  10   0  700.63   36.20
  -4  10   0  698.73   34.90
  -4  10   0  695.43   27.70
   4  10   0  719.93   37.00
  -4  10   0  707.13   34.20
  -4  10   0  713.33   35.10
   4  10   0  722.23   35.30
   4  10   0  674.73   32.60
   4  10   0  766.22   35.10
  -4  10   0  709.13   31.10
  -5 -10   0   29.80   11.70
   5 -10   0   43.50   15.10
  -5 -10   0   12.00    8.80
  -5 -10   0   17.50   11.00
   5 -10   0   12.80   14.30
  -5 -10   0   23.20   13.70
   5 -10   0   18.70   10.50
  -5 -10   0   19.40    8.70
   5 -10   0   13.60   12.90
  -5  10   0   40.50   14.30
   5  10   0   18.90   11.50
   5  10   0   23.80   13.50
   5  10   0   33.80   14.50
   5  10   0    5.70    9.50
  -5  10   0   12.90   10.80
  -5  10   0   12.70    6.20
  -5  10   0   28.80   13.30
  -5  10   0    8.50    8.90
   6 -10   0   33.90   15.20
   6 -10   0   25.20   11.20
   6 -10   0   36.90   13.80
  -6 -10   0   -6.20   12.30
  -6 -10   0    9.80   11.40
  -6 -10   0   10.40    8.60
   6 -10   0   24.30    9.60
   6 -10   0    6.80    8.80
   6  10   0    6.70   13.60
   6  10   0   13.60   10.50
   6  10   0    5.00    6.80
  -6  10   0    9.90   13.20
  -6  10   0   10.90   12.90
  -6  10   0   19.20    8.80
  -6  10   0   18.50    6.00
   6  10   0    5.60   11.80
  -6  10   0   -0.10   10.70
  -6  10   0   -7.10   10.40
  -6  10   0   14.30   13.30
   6  10   0   28.20   11.80
  -7 -10   0  135.49   18.90
   7 -10   0  134.79   19.90
   7 -10   0  141.99   16.70
  -7 -10   0  149.59   20.70
  -7 -10   0  148.59   14.30
   7 -10   0  160.28   21.20
   7 -10   0  147.19   15.70
   7 -10   0  153.88   21.30
  -7 -10   0  168.68   20.90
   7 -10   0  149.29   16.10
  -7  10   0  126.19   18.50
  -7  10   0  163.78   20.50
  -7  10   0  155.08   10.20
   7  10   0  127.19   12.70
  -7  10   0  125.19   17.80
   7  10   0  116.49   19.10
  -7  10   0  158.58   17.00
   7  10   0  167.98   19.10
   7  10   0  163.68   20.40
   7  10   0  105.39   22.50
   8 -10   0    9.80   14.10
   8 -10   0    3.80   13.20
   8 -10   0   -5.20   13.40
   8 -10   0    4.00    8.80
  -8 -10   0   -9.00    8.50
  -8 -10   0  -10.50   14.00
   8 -10   0    3.30   11.50
  -8 -10   0  -27.10   12.00
  -8 -10   0    6.00    8.60
  -8  10   0    4.90   11.50
   8  10   0    4.50   12.80
  -8  10   0   10.60   13.30
  -8  10   0    8.80   13.00
  -8  10   0   -3.50    4.40
   8  10   0   -1.80   11.50
  -8  10   0  -10.30    4.50
  -8  10   0   -7.00   10.50
   8  10   0  -15.70   11.30
   8  10   0    8.10   14.00
   8  10   0   -6.60    6.90
   9 -10   0   19.00   14.70
  -9 -10   0   -8.80   14.10
   9 -10   0  -11.00   11.20
  -9 -10   0    5.30   15.40
   9 -10   0    3.60    9.00
   9 -10   0    8.90   15.70
  -9 -10   0    0.90    9.20
   9 -10   0  -10.20    9.70
  -9  10   0   18.90   14.60
   9  10   0   16.30   14.70
   9  10   0   -3.60   12.50
  -9  10   0    7.20   10.60
  -9  10   0   12.70    4.80
  -9  10   0   -9.40   12.50
   9  10   0   -1.20   11.00
   9  10   0    7.00    8.00
   9  10   0    4.20   11.50
  -9  10   0   -3.50    4.10
 -10 -10   0   -7.70   13.20
  10 -10   0    1.30   12.30
 -10 -10   0   14.50   10.60
  10 -10   0   16.10   16.50
 -10 -10   0   -5.90   14.00
  10 -10   0   12.10   15.20
  10 -10   0   13.00    8.80
  10 -10   0   10.20   15.20
  10  10   0   19.60   15.80
 -10  10   0   16.90   11.20
 -10  10   0   -9.60   14.20
 -10  10   0   17.00    4.80
 -10  10   0   15.50    4.80
  10  10   0   49.20   15.20
  10  10   0   -7.10   12.50
  10  10   0   16.30   14.00
  11 -10   0    0.90   12.90
 -11 -10   0   13.90   12.20
  11 -10   0   24.70   17.40
  11 -10   0   12.70   14.60
 -11 -10   0   47.10   18.20
  11 -10   0   -3.30    8.60
  11 -10   0    1.00   11.50
 -11 -10   0   28.60   11.70
  11  10   0   14.10    9.10
  11  10   0   28.20   14.70
 -11  10   0   13.70    4.50
  11  10   0    7.00   15.00
  11  10   0    3.10   14.70
 -11  10   0   10.40   16.10
 -11  10   0    9.00    4.50
  11  10   0   -2.90   11.00
 -11  10   0   -6.70    9.80
 -12 -10   0  412.76   31.50
  12 -10   0  362.96   25.70
  12 -10   0  345.27   20.70
  12 -10   0  324.77   31.10
  12 -10   0  370.66   32.70
 -12 -10   0  365.36   24.40
  12 -10   0  359.56   27.50
 -12 -10   0  355.06   27.40
  12  10   0  350.56   29.50
 -12  10   0  341.77   14.20
 -12  10   0  272.47   28.70
 -12  10   0  373.76   25.80
 -12  10   0  330.87   14.20
  12  10   0  348.37   22.40
  12  10   0  309.87   26.70
  12  10   0  344.77   30.10
  12  10   0  341.97   30.10
  13 -10   0   14.60   14.20
  13 -10   0   30.00   14.10
  13 -10   0    7.00   16.90
  13 -10   0    9.70    8.70
 -13 -10   0   16.70   12.40
 -13 -10   0   -0.80   17.00
  13 -10   0   15.20   18.60
 -13 -10   0    9.80   13.00
 -13  10   0   19.00    4.90
  13  10   0   23.50   17.20
  13  10   0   47.00   15.00
  13  10   0    7.90   14.20
 -13  10   0   24.90   17.00
  13  10   0   -1.90   11.60
 -13  10   0   18.50    4.90
 -13  10   0   14.50   10.80
  14 -10   0  630.14   41.60
  14 -10   0  642.04   36.60
 -14 -10   0  741.93   42.60
  14 -10   0  697.33   39.40
 -14 -10   0  678.83   39.20
 -14 -10   0  616.84   34.40
  14 -10   0  626.34   42.20
  14 -10   0  681.13   32.10
 -14  10   0  688.53   24.10
  14  10   0  626.94   40.50
  14  10   0  731.03   41.90
 -14  10   0  735.03   42.30
  14  10   0  706.43   38.20
  14  10   0  688.33   41.90
 -14  10   0  645.84   23.80
 -14  10   0  708.13   30.70
  15 -10   0   37.80   19.80
 -15 -10   0   39.80   14.90
 -15 -10   0   45.60   19.40
  15 -10   0    8.00   18.60
 -15 -10   0   64.99   21.20
  15 -10   0   35.60    8.50
  15 -10   0   53.89   16.50
  15 -10   0  -15.90   15.70
  15  10   0   53.39   16.90
 -15  10   0   36.30    5.80
 -15  10   0   17.70    7.90
 -15  10   0   66.79   20.90
 -15  10   0   26.10    9.10
  15  10   0    1.80   18.50
  15  10   0   27.10   18.30
  15  10   0   45.20   16.10
 -16 -10   0   11.00   19.70
 -16 -10   0   17.10   14.30
  16 -10   0   17.10   18.80
  16 -10   0   43.00   17.80
  16 -10   0   13.30   19.20
  16  10   0   19.80   19.50
  16  10   0   65.59   17.80
 -16  10   0   31.90    8.70
 -16  10   0   46.90   19.00
  16  10   0   42.70   18.00
  16  10   0    7.00   16.70
 -16  10   0   25.30    5.40
  17 -10   0   25.00   21.70
 -17 -10   0   60.29   17.40
 -17 -10   0   11.70   20.20
  17 -10   0   30.30   20.60
  17 -10   0   47.90   18.10
  17 -10   0   50.09   17.70
  17  10   0   46.90   19.20
 -17  10   0   27.20    5.90
  17  10   0   53.29   17.80
  17  10   0   20.60   19.60
  17  10   0   15.50   15.30
  18 -10   0  177.88   29.70
  18 -10   0  192.48   24.50
 -18 -10   0  152.18   28.30
  18 -10   0  177.28   29.60
  18 -10   0  180.28   29.20
 -18 -10   0  199.48   23.50
  18  10   0  202.98   28.90
 -18  10   0  158.98   12.10
 -18  10   0  189.98   28.30
  18  10   0  201.88   27.60
  18  10   0  211.18   26.40
  19 -10   0   -1.20   21.30
 -19 -10   0   -7.00   20.70
  19 -10   0   36.20   21.80
  19 -10   0  -33.20   15.80
 -19 -10   0    4.80   15.30
  19 -10   0    0.20   21.60
  19  10   0    0.70   21.20
 -19  10   0   -5.60   20.60
  19  10   0    4.50   18.70
  19  10   0   18.90   24.10
  20 -10   0  -10.80   20.90
  20 -10   0  -12.80   33.00
 -20 -10   0   17.50   17.00
  20 -10   0   21.90   20.40
 -20 -10   0   35.40   23.20
  20 -10   0   22.50   18.40
 -20  10   0  -15.60   21.00
  20  10   0    5.10   22.30
  20  10   0   26.10   19.10
  20  10   0   -1.90   21.10
  20  10   0   -6.90   20.60
   0 -11   0  -16.50   12.90
   0 -11   0    1.10    6.90
   0 -11   0   -8.80   13.00
   0 -11   0    0.00    7.90
   0 -11   0  -14.00   11.20
   0  11   0    9.70   10.10
   0  11   0   11.20   13.30
   0  11   0   -4.20    8.30
   0  11   0    8.10   12.40
   0  11   0  -11.30   10.50
   1 -11   0  143.59   14.10
  -1 -11   0  157.88   20.80
  -1 -11   0  179.68   19.50
   1 -11   0  124.09   20.20
  -1 -11   0  122.09   17.90
  -1 -11   0  130.69   13.20
   1 -11   0  110.19   16.60
   1 -11   0  121.29   12.90
   1 -11   0  139.69   20.40
   1  11   0  156.48   20.80
   1  11   0  144.29   19.60
   1  11   0  145.39   17.50
   1  11   0  121.89   19.40
  -1  11   0  145.29   20.20
   1  11   0  116.39   14.20
  -1  11   0  120.09   17.70
  -1  11   0  149.79   18.70
  -1  11   0  142.89   20.20
  -1  11   0  138.49   13.90
   2 -11   0   33.80   14.50
   2 -11   0   41.50   10.60
  -2 -11   0   34.70    9.90
  -2 -11   0   43.40    9.80
  -2 -11   0   49.20   13.40
  -2 -11   0   44.60   15.90
   2 -11   0   29.50   13.20
  -2 -11   0   34.10   14.80
   2 -11   0   69.59   14.80
   2  11   0   26.80   12.90
   2  11   0   41.20   15.20
  -2  11   0   64.09   13.70
   2  11   0   41.00   11.60
  -2  11   0   62.29   16.30
  -2  11   0   67.09   12.60
   2  11   0   50.99   14.60
  -2  11   0   46.20   14.80
   2  11   0   37.30   15.80
  -2  11   0   46.40    9.80
  -3 -11   0  393.56   28.50
   3 -11   0  380.46   24.90
   3 -11   0  367.26   21.60
  -3 -11   0  394.66   27.00
  -3 -11   0  338.87   22.70
   3 -11   0  377.56   29.00
  -3 -11   0  358.66   29.10
  -3 -11   0  378.86   20.50
   3 -11   0  363.06   28.20
   3  11   0  334.57   23.70
  -3  11   0  314.37   22.90
  -3  11   0  395.76   28.60
   3  11   0  368.56   24.90
   3  11   0  377.96   25.80
  -3  11   0  409.96   28.20
  -3  11   0  353.96   26.00
   3  11   0  403.26   28.40
  -3  11   0  376.26   19.50
   3  11   0  367.46   23.10
   4 -11   0   48.10   16.40
  -4 -11   0   50.29   16.60
   4 -11   0   82.69   15.20
   4 -11   0   36.70   16.40
  -4 -11   0   64.59   16.30
  -4 -11   0   71.79   11.00
   4 -11   0   65.09   12.20
  -4 -11   0   75.99   16.90
  -4  11   0   79.19   13.40
  -4  11   0   63.89   16.80
   4  11   0   71.29   17.60
   4  11   0   60.99   14.30
  -4  11   0   68.29    9.40
   4  11   0   81.99   15.30
  -4  11   0   64.99   16.70
   4  11   0   80.39   14.80
  -4  11   0   79.29   15.80
  -5 -11   0  991.30   45.00
   5 -11   0  940.51   46.60
  -5 -11   0  891.41   44.30
  -5 -11   0 1005.20   46.10
   5 -11   0  951.30   46.70
   5 -11   0  945.71   42.40
  -5 -11   0  957.40   37.80
   5  11   0  927.01   45.30
  -5  11   0  967.30   44.10
  -5  11   0 1053.59   44.00
   5  11   0 1034.10   43.40
  -5  11   0  949.80   44.30
  -5  11   0  973.70   35.10
   5  11   0  985.90   45.70
  -5  11   0  895.81   45.20
   5  11   0  912.81   50.39
  -6 -11   0   -5.20    8.60
   6 -11   0   -3.80   10.30
   6 -11   0    2.40   13.10
  -6 -11   0  -21.70   14.40
  -6 -11   0   16.90   14.20
   6 -11   0   13.60   11.90
   6 -11   0    7.20   11.80
   6 -11   0   11.30    9.70
  -6 -11   0  -13.30   10.70
   6  11   0   -8.70   11.10
   6  11   0    7.20   12.90
  -6  11   0    3.60   10.30
  -6  11   0  -13.10   10.40
  -6  11   0    5.40   11.90
  -6  11   0   -8.50   11.00
   6  11   0   12.80   13.80
  -6  11   0   -3.90    5.70
   6  11   0  -13.20   13.70
  -7 -11   0    9.50    9.50
   7 -11   0   11.40   12.40
   7 -11   0   23.20   16.20
  -7 -11   0   16.10   12.70
   7 -11   0   13.10   14.60
  -7 -11   0   17.00   15.20
  -7 -11   0   28.30   16.80
   7 -11   0    2.10   14.10
  -7  11   0    7.20   12.40
   7  11   0   15.10   11.60
   7  11   0   14.40   13.30
  -7  11   0   10.30   14.50
  -7  11   0   -9.20   13.80
  -7  11   0    3.20   14.60
  -7  11   0   16.90    5.90
   7  11   0    6.70    7.70
   7  11   0   14.30   14.70
   7  11   0   38.40   13.60
   8 -11   0   68.19   14.80
  -8 -11   0   86.29   19.50
  -8 -11   0   39.30   14.20
   8 -11   0   53.79   18.70
   8 -11   0   58.59   17.90
  -8 -11   0   68.19   11.80
   8 -11   0   72.59   18.60
  -8  11   0   63.59    6.80
  -8  11   0   64.79   17.70
   8  11   0   56.29   15.40
  -8  11   0   82.09   19.40
  -8  11   0   67.59   17.60
   8  11   0   80.89   15.20
  -8  11   0   71.69    7.20
   8  11   0   70.89   19.10
   8  11   0   71.49   10.80
   8  11   0   86.79   17.80
  -8  11   0   41.70   13.20
   9 -11   0 1331.27   56.49
   9 -11   0 1242.48   51.89
  -9 -11   0 1443.86   57.89
   9 -11   0 1241.18   57.89
  -9 -11   0 1296.87   49.20
   9 -11   0 1228.28   57.89
  -9 -11   0 1270.67   58.19
  -9  11   0 1178.88   55.39
   9  11   0 1315.97   49.99
   9  11   0 1243.58   54.39
   9  11   0 1258.97   55.59
  -9  11   0 1223.08   40.90
   9  11   0 1301.87   57.49
   9  11   0 1287.77   57.29
  -9  11   0 1345.37   51.89
  -9  11   0 1231.58   41.10
  -9  11   0 1211.78   56.49
 -10 -11   0   -8.80   16.40
  10 -11   0   25.90   17.70
 -10 -11   0   15.90   16.40
  10 -11   0   21.00   17.00
  10 -11   0   20.20   13.40
  10 -11   0   16.10   13.00
 -10  11   0   -5.70   15.70
 -10  11   0    7.50   11.90
  10  11   0    6.30    8.60
  10  11   0    5.60   15.50
  10  11   0    4.90   14.40
 -10  11   0   14.00    4.10
  10  11   0   25.60   15.20
 -10  11   0    2.20   15.30
  10  11   0    5.00   16.20
  11 -11   0   43.30   15.10
 -11 -11   0   84.99   21.10
  11 -11   0   53.09   19.40
 -11 -11   0   50.89   23.60
  11 -11   0   34.30   15.80
 -11 -11   0   46.20   13.30
  11 -11   0   45.40   15.60
  11  11   0   39.90   10.60
 -11  11   0   41.60   17.20
  11  11   0   68.49   19.80
 -11  11   0   47.20    4.20
  11  11   0   55.19   16.10
  11  11   0   37.60   14.30
 -11  11   0   17.20   17.20
 -11  11   0   44.70   13.30
  11  11   0  118.59   22.50
 -12 -11   0   29.20   12.20
 -12 -11   0   30.40   17.80
  12 -11   0  -14.10   16.30
  12 -11   0   38.90   15.60
 -12 -11   0   31.30   17.70
  12 -11   0   14.10   17.10
  12 -11   0   20.00   14.10
  12  11   0   39.90   18.80
 -12  11   0   18.90   16.60
 -12  11   0    3.50   16.50
  12  11   0   -1.10   15.10
  12  11   0   -4.70   14.90
 -12  11   0   39.90   12.80
  12  11   0   24.40   15.70
  13 -11   0  329.37   28.90
  13 -11   0  373.26   34.40
  13 -11   0  436.86   33.50
  13 -11   0  305.37   33.50
  13 -11   0  354.86   28.80
 -13 -11   0  303.27   31.40
 -13 -11   0  298.27   32.40
 -13 -11   0  345.77   24.80
  13  11   0  345.07   28.70
  13  11   0  431.26   33.10
  13  11   0  411.46   30.10
 -13  11   0  331.97   23.40
 -13  11   0  348.47   33.10
 -14 -11   0  -11.50   17.20
  14 -11   0   -5.10   19.50
 -14 -11   0    3.50   12.10
 -14 -11   0    5.10   17.90
  14 -11   0   10.20    8.50
  14 -11   0    5.80   13.50
  14 -11   0  -16.20   15.00
  14 -11   0  -16.90   14.30
  14  11   0   24.10   18.90
 -14  11   0    2.00   18.30
  14  11   0    9.60   16.90
 -14  11   0    8.60   10.50
  14  11   0   14.20   15.40
  14  11   0   16.60   18.40
  15 -11   0   16.50   19.20
  15 -11   0  -24.90   20.50
  15 -11   0   -3.20   18.40
 -15 -11   0   16.40   13.80
 -15 -11   0   19.60   17.70
  15 -11   0   18.70   16.10
 -15 -11   0    5.20   17.10
  15  11   0    8.90   18.80
  15  11   0   16.90   17.80
 -15  11   0   15.00   18.90
  15  11   0    1.30   15.70
  15  11   0   -2.60   18.70
 -15  11   0   -2.80   10.60
 -16 -11   0   23.80   20.10
  16 -11   0   15.70   19.30
 -16 -11   0    4.70   13.90
  16 -11   0   43.80   23.10
  16 -11   0    9.60   20.00
  16 -11   0   62.59   18.80
 -16  11   0   10.70    9.10
 -16  11   0   16.40   18.70
  16  11   0  -20.60   17.10
  16  11   0   56.29   18.90
  16  11   0   10.90   18.80
  16  11   0   24.50   20.70
 -17 -11   0   29.00   21.30
  17 -11   0   34.20   18.50
  17 -11   0   40.50   23.20
  17 -11   0   -2.10   21.00
 -17 -11   0   49.50   16.80
  17 -11   0   18.50   16.10
  17  11   0   17.60   17.10
  17  11   0   39.70   17.30
 -17  11   0   36.80    8.90
  17  11   0   15.60   19.70
  17  11   0   35.70   21.80
 -17  11   0   48.40   22.20
  18 -11   0   -6.70   19.40
 -18 -11   0   47.90   22.90
  18 -11   0    8.50   21.30
 -18 -11   0   15.50   26.30
  18 -11   0   14.20   16.00
  18 -11   0   17.20   21.10
  18  11   0   22.00   16.70
  18  11   0   26.90   21.00
  18  11   0    4.90   21.60
 -18  11   0   20.30   20.00
 -19 -11   0   18.80   23.20
  19 -11   0    4.80   23.60
  19 -11   0   17.60   23.70
  19 -11   0   11.00   18.80
 -19 -11   0   22.90   16.30
  19  11   0    4.60   16.70
  19  11   0   12.40   22.60
  19  11   0   19.10   24.10
 -19  11   0   50.49   23.80
   0 -12   0  103.69   20.30
   0 -12   0  109.09   13.20
   0 -12   0  152.08   15.10
   0 -12   0  100.09   20.50
   0 -12   0  105.29   17.70
   0  12   0  110.99   20.30
   0  12   0  116.49   19.50
   0  12   0  112.59   20.20
   0  12   0  128.09   19.60
   0  12   0  133.49   20.90
  -1 -12   0   40.00   14.70
  -1 -12   0   50.19   10.80
   1 -12   0   59.79   15.20
   1 -12   0   43.40   16.90
   1 -12   0   58.29   17.10
  -1 -12   0   32.10   10.50
  -1 -12   0   51.09   14.80
   1 -12   0   48.80   11.50
  -1 -12   0    7.90   12.50
   1  12   0   62.89   14.80
  -1  12   0   63.69   16.00
   1  12   0   49.20   14.20
   1  12   0   58.29   16.50
   1  12   0   37.00   16.80
  -1  12   0   66.99   11.80
  -1  12   0   38.10   13.50
  -1  12   0   51.09   16.10
   1  12   0   63.19   12.90
  -1  12   0   54.99   16.00
  -2 -12   0   40.70   17.60
  -2 -12   0   39.00   11.20
  -2 -12   0   49.70   17.40
  -2 -12   0   41.00   14.30
   2 -12   0   49.60   15.20
   2 -12   0   50.59   11.80
   2 -12   0   36.10   16.50
  -2 -12   0   40.00   10.40
   2 -12   0   47.60   16.70
  -2  12   0   26.90    9.60
  -2  12   0   40.40   14.10
   2  12   0   67.79   17.80
   2  12   0   25.70   14.20
  -2  12   0   58.39   17.30
   2  12   0   44.40   13.20
   2  12   0   38.00   12.20
   2  12   0   61.29   16.90
  -2  12   0   35.10   12.00
  -2  12   0   27.30   13.90
   3 -12   0  112.69   15.00
  -3 -12   0  146.59   14.50
   3 -12   0  111.49   17.30
  -3 -12   0  161.58   20.80
   3 -12   0  154.18   23.40
   3 -12   0  169.78   23.00
  -3 -12   0  119.69   18.90
  -3 -12   0   82.89   18.10
   3  12   0   97.49   17.30
  -3  12   0  169.88   21.90
  -3  12   0  129.49   13.00
  -3  12   0  101.89   18.00
   3  12   0  163.38   17.30
   3  12   0  138.59   20.20
  -3  12   0  146.29   21.70
  -3  12   0  126.89   19.40
   3  12   0  148.19   22.80
   3  12   0  125.79   19.20
   4 -12   0  303.37   25.30
   4 -12   0  233.38   20.70
   4 -12   0  265.07   27.90
  -4 -12   0  238.48   25.90
  -4 -12   0  221.18   23.50
  -4 -12   0  241.08   17.30
  -4 -12   0  278.57   28.90
   4 -12   0  253.87   27.60
   4  12   0  291.97   22.30
   4  12   0  266.67   23.00
   4  12   0  248.48   25.80
  -4  12   0  267.27   16.60
  -4  12   0  244.08   23.60
  -4  12   0  221.48   25.70
  -4  12   0  274.77   24.30
   4  12   0  243.18   25.20
  -4  12   0  262.07   26.80
   4  12   0  247.28   26.70
   5 -12   0    1.10   12.00
   5 -12   0    7.40   10.20
   5 -12   0    2.70   12.90
  -5 -12   0   25.50   15.80
  -5 -12   0   11.80   15.70
   5 -12   0   15.00   16.50
  -5 -12   0   30.00   14.70
  -5 -12   0   14.80    9.40
  -5  12   0   20.50    7.50
  -5  12   0   13.40   12.50
   5  12   0   24.40   16.10
  -5  12   0   -3.20   15.10
   5  12   0    2.00   11.20
  -5  12   0   -2.10   13.70
   5  12   0    4.00   11.70
   6 -12   0  286.27   29.20
   6 -12   0  245.68   27.10
  -6 -12   0  290.57   29.10
  -6 -12   0  276.87   19.40
  -6 -12   0  228.48   25.30
   6 -12   0  263.77   23.40
   6  12   0  281.17   28.50
  -6  12   0  188.68   24.70
   6  12   0  276.27   23.50
  -6  12   0  215.68   25.60
   6  12   0  260.07   27.30
  -6  12   0  263.77   23.40
   6  12   0  325.07   27.80
  -6  12   0  270.87   14.90
   7 -12   0  137.59   23.70
   7 -12   0  133.19   23.50
  -7 -12   0   98.69   20.90
   7 -12   0  145.79   19.10
  -7 -12   0  190.08   23.80
  -7 -12   0  132.59   15.30
  -7  12   0  123.39   10.30
   7  12   0  133.59   21.10
  -7  12   0  129.69   18.70
   7  12   0  176.08   21.30
   7  12   0  136.69   19.50
   7  12   0  143.29   21.90
  -7  12   0  141.69   21.20
  -7  12   0  123.89   21.20
  -8 -12   0   -6.60    9.80
  -8 -12   0   -3.90   11.80
   8 -12   0   -4.50   14.90
  -8 -12   0   -8.60   15.90
   8 -12   0    2.40   14.10
   8  12   0  -11.30   14.50
  -8  12   0    5.00    5.30
  -8  12   0    6.50   13.10
   8  12   0   -8.70   15.50
  -8  12   0   -1.80   11.50
   8  12   0    1.70   13.30
  -8  12   0   -4.60   15.30
  -8  12   0    5.50    4.80
   9 -12   0   26.10   15.00
  -9 -12   0   26.00   18.60
  -9 -12   0   16.70   13.50
   9 -12   0   -1.50   16.20
   9 -12   0   20.10   17.40
   9  12   0   37.20   15.20
  -9  12   0    6.90   15.80
   9  12   0   25.50   15.60
  -9  12   0   34.70   17.50
  -9  12   0    9.10   13.40
  -9  12   0   14.20    4.10
   9  12   0    3.20    8.50
  -9  12   0   31.60   16.90
   9  12   0   15.10   15.20
 -10 -12   0   85.59   21.40
  10 -12   0   37.30   20.10
  10 -12   0   66.59   19.60
  10 -12   0   83.19   21.70
 -10 -12   0   39.60   11.80
 -10 -12   0   44.60   18.00
  10 -12   0   49.30   15.80
  10  12   0   36.20   18.70
 -10  12   0   46.40   19.70
 -10  12   0   70.99   15.60
 -10  12   0   51.59   19.00
  10  12   0   41.70   18.70
  10  12   0   62.29   18.20
  10  12   0   51.59   19.60
  10  12   0   51.39   10.70
 -10  12   0   28.80   19.60
 -11 -12   0  114.09   22.00
  11 -12   0  164.88   26.20
 -11 -12   0  191.48   25.90
  11 -12   0  125.49   20.80
  11 -12   0  178.98   21.40
 -11 -12   0  157.08   17.20
  11 -12   0  106.99   24.20
  11  12   0  117.89   22.10
  11  12   0  184.68   25.80
 -11  12   0  122.89   18.30
 -11  12   0  115.09   23.20
  11  12   0  138.29   15.20
 -11  12   0  159.28   24.60
  11  12   0  156.08   25.00
  11  12   0  125.89   22.50
 -12 -12   0   70.99   14.40
  12 -12   0   91.29   24.20
  12 -12   0   66.39   18.30
 -12 -12   0   51.39   21.70
  12 -12   0   82.29   18.60
 -12 -12   0   98.59   21.80
  12 -12   0   89.89   23.20
  12  12   0   90.29   21.10
 -12  12   0   79.29   15.50
 -12  12   0   69.89   19.40
  12  12   0   78.69   21.30
 -12  12   0   30.90   17.90
  12  12   0   70.69   18.40
  12  12   0   87.69   20.80
  13 -12   0   51.69   20.70
  13 -12   0   32.30   17.30
  13 -12   0   15.70   17.40
 -13 -12   0   50.89   16.50
 -13 -12   0  100.19   23.70
  13 -12   0   73.89   22.00
 -13 -12   0   48.20   14.40
  13  12   0   47.30   20.10
 -13  12   0   34.10   12.90
  13  12   0   70.79   22.10
 -13  12   0   35.00   21.60
  13  12   0   44.50   19.60
 -13  12   0  105.89   22.80
  13  12   0   33.00   18.20
 -14 -12   0  318.67   33.50
  14 -12   0  386.36   37.80
  14 -12   0  373.96   31.90
  14 -12   0  414.46   30.30
  14 -12   0  340.37   35.60
 -14 -12   0  406.36   27.40
 -14 -12   0  413.06   36.40
 -14  12   0  456.45   37.20
 -14  12   0  413.76   25.50
  14  12   0  372.06   31.00
 -14  12   0  388.16   35.40
  14  12   0  417.66   38.10
  14  12   0  347.87   36.40
  14  12   0  414.36   33.20
  15 -12   0   48.40   21.70
  15 -12   0   11.30   15.70
 -15 -12   0   24.00   13.60
  15 -12   0   39.70   20.70
 -15 -12   0   46.00   21.90
 -15 -12   0    4.80   19.20
  15 -12   0   16.70   22.00
  15  12   0    1.00   17.10
 -15  12   0   26.00   11.70
  15  12   0   23.20   21.30
 -15  12   0   46.70   19.90
 -15  12   0   15.80   20.30
  15  12   0   31.10   20.70
  15  12   0    0.00   17.10
  16 -12   0   14.80   21.10
 -16 -12   0   11.30   20.90
  16 -12   0   29.20   21.20
  16 -12   0   -1.10   15.10
 -16 -12   0    9.10   13.70
  16 -12   0  -25.00   20.40
 -16  12   0    4.10   18.20
  16  12   0   -9.80   17.30
  16  12   0   13.30   20.80
  16  12   0   -9.10   18.40
 -16  12   0    2.00   19.30
  16  12   0   -1.50   19.60
 -16  12   0   12.90   10.70
  17 -12   0   18.10   17.80
  17 -12   0   69.79   20.30
 -17 -12   0   49.10   25.20
  17 -12   0   52.79   25.70
  17 -12   0   23.20   28.30
  17  12   0   76.49   21.20
  17  12   0   56.39   24.10
  17  12   0   14.50   35.40
 -17  12   0  109.59   25.40
 -17  12   0   73.39   24.70
  18 -12   0  214.78   33.90
  18 -12   0  199.88   33.20
 -18 -12   0  197.58   23.30
  18 -12   0  126.79   29.30
  18 -12   0  165.68   25.30
 -18 -12   0  176.88   31.60
 -18  12   0  200.48   31.30
  18  12   0  224.78   32.40
  18  12   0  214.28   32.00
 -18  12   0  209.28   30.70
  18  12   0  162.98   25.00
  18  12   0  229.58   32.90
   0 -13   0  -25.30   14.60
   0 -13   0  -22.50   13.50
   0 -13   0  -12.60    8.40
   0 -13   0   11.90   10.00
   0 -13   0   12.90   16.10
   0  13   0    1.30    9.90
   0  13   0   -4.80   13.50
   0  13   0  -18.20   14.60
   0  13   0   19.70   17.00
   0  13   0   12.80    9.90
   1 -13   0  224.08   21.90
  -1 -13   0  196.68   26.20
   1 -13   0  199.98   27.20
  -1 -13   0  230.08   18.60
   1 -13   0  200.48   25.90
   1 -13   0  191.48   22.30
  -1 -13   0  228.98   23.90
  -1 -13   0  166.28   23.40
  -1  13   0  173.08   25.00
   1  13   0  177.58   20.50
   1  13   0  179.58   24.20
   1  13   0  232.88   28.60
  -1  13   0  201.48   23.00
   1  13   0  214.48   19.20
   1  13   0  262.57   27.10
  -1  13   0  244.48   25.60
  -1  13   0  184.78   25.60
  -2 -13   0   40.50   16.60
   2 -13   0   76.09   17.40
  -2 -13   0   49.90   18.70
   2 -13   0   45.70   12.10
   2 -13   0   56.79   19.90
  -2 -13   0   84.29   12.80
  -2 -13   0   80.99   21.10
   2 -13   0   83.79   20.80
   2  13   0   84.79   19.40
  -2  13   0   75.39   11.90
   2  13   0   51.19   15.60
  -2  13   0   84.99   19.20
   2  13   0   74.59   15.10
  -2  13   0   96.49   20.00
   2  13   0   39.60   16.00
   2  13   0   94.79   20.80
  -2  13   0   61.99   19.40
  -3 -13   0   48.40   11.40
  -3 -13   0   26.40   18.50
  -3 -13   0   52.79   17.80
   3 -13   0   41.00   19.20
  -3 -13   0   40.50   17.50
   3 -13   0   40.70   15.50
   3 -13   0   42.00   12.30
   3 -13   0   43.40   18.90
   3  13   0   43.80   18.10
   3  13   0   23.30   17.30
   3  13   0   22.50   15.60
  -3  13   0   19.50   14.40
  -3  13   0   45.10   10.40
   3  13   0   64.59   16.10
  -3  13   0   85.99   18.30
  -3  13   0   51.79   18.20
   3  13   0   43.90   14.30
  -4 -13   0   68.69   19.60
  -4 -13   0   99.69   21.90
   4 -13   0   96.99   15.30
   4 -13   0   77.89   16.90
  -4 -13   0  105.49   13.40
   4 -13   0   77.29   21.40
   4 -13   0  116.59   38.50
  -4 -13   0   78.39   20.10
  -4  13   0   70.29   10.60
   4  13   0   78.09   15.30
   4  13   0   74.19   18.10
  -4  13   0   99.39   21.40
  -4  13   0   76.49   19.70
   4  13   0  100.19   18.50
  -4  13   0  129.59   20.40
   5 -13   0  154.78   28.30
   5 -13   0  114.29   17.40
   5 -13   0   84.59   18.10
  -5 -13   0  115.89   23.60
   5 -13   0   89.19   17.70
  -5 -13   0  106.79   21.10
  -5 -13   0  123.09   14.10
   5  13   0   98.99   21.80
   5  13   0  156.48   21.40
  -5  13   0  105.99   10.70
   5  13   0  129.19   20.70
   5  13   0   80.79   16.60
   5  13   0  126.89   21.50
  -5  13   0   75.79   18.30
  -5  13   0  106.99   20.20
  -5  13   0   92.19   21.40
   6 -13   0  109.49   17.60
  -6 -13   0   98.49   19.40
   6 -13   0  114.69   18.80
   6 -13   0  127.29   24.20
  -6 -13   0  114.69   18.40
   6 -13   0  131.69   24.90
  -6 -13   0  109.99   14.00
   6  13   0  125.49   19.10
   6  13   0  100.69   19.60
   6  13   0  107.39   22.40
  -6  13   0  118.29   20.10
  -6  13   0  105.79   21.30
   6  13   0  108.29   19.10
  -6  13   0  115.59   10.70
   6  13   0  150.08   23.20
   7 -13   0   43.90   14.00
   7 -13   0   52.29   19.70
  -7 -13   0   38.70   20.20
   7 -13   0   18.30   16.90
   7 -13   0   16.40   15.50
  -7 -13   0   23.90   19.90
  -7 -13   0   56.59   12.10
   7  13   0   12.10   15.50
   7  13   0   39.00   15.60
   7  13   0   45.20   18.30
  -7  13   0   37.10   16.50
   7  13   0   47.80   15.80
  -7  13   0   30.60    6.50
  -7  13   0   35.90   15.20
  -7  13   0   54.29   19.00
   8 -13   0   58.49   21.50
  -8 -13   0   58.09   13.30
  -8 -13   0   56.39   19.00
   8 -13   0   46.00   15.90
  -8 -13   0   21.70   19.80
   8 -13   0   60.99   22.00
   8  13   0   43.40   19.80
  -8  13   0   60.79   20.30
   8  13   0   53.29   19.10
  -8  13   0   67.09   17.20
  -8  13   0   54.99    6.00
   8  13   0   41.80   16.40
  -8  13   0   57.59    6.60
  -8  13   0   22.30   17.30
   8  13   0   42.60   18.90
   9 -13   0  187.88   27.00
   9 -13   0  161.78   27.10
  -9 -13   0  211.18   20.40
   9 -13   0  196.18   27.80
  -9 -13   0  223.68   27.70
  -9 -13   0  148.99   30.40
   9 -13   0  185.98   22.00
  -9  13   0  246.58   26.80
  -9  13   0  226.78   23.00
   9  13   0  160.38   25.60
   9  13   0  190.58   25.80
   9  13   0  157.08   24.60
   9  13   0  148.99   28.10
  -9  13   0  167.08   24.90
  10 -13   0   -4.90   17.30
  10 -13   0  -25.10   13.00
  10 -13   0   -0.20   14.10
  10 -13   0  -17.90   16.30
 -10 -13   0   -8.10   19.20
 -10 -13   0   21.70   11.50
 -10 -13   0    1.60   17.10
 -10  13   0   35.60   19.90
  10  13   0    8.80   14.20
  10  13   0  -10.70   15.50
  10  13   0  -10.00   16.60
  10  13   0   19.20    8.70
 -10  13   0   -5.30   14.40
 -10  13   0   20.90   14.10
  10  13   0   15.40   18.50
  11 -13   0   10.90   18.00
  11 -13   0   22.40   16.40
 -11 -13   0   13.20   16.70
  11 -13   0   15.80   19.10
 -11 -13   0   42.70   12.90
 -11 -13   0   36.30   21.10
  11  13   0    6.00   17.30
  11  13   0   44.50   18.10
  11  13   0    6.60   17.50
 -11  13   0   14.60   25.30
 -11  13   0    0.10   13.40
 -11  13   0    7.60   18.20
  11  13   0   49.00   20.90
 -11  13   0   30.00   18.90
  12 -13   0  324.17   37.90
  12 -13   0  276.87   27.00
  12 -13   0  292.67   33.70
 -12 -13   0  280.47   22.40
 -12 -13   0  237.78   28.80
  12 -13   0  289.37   33.50
 -12 -13   0  294.07   32.10
 -12  13   0  271.57   24.30
 -12  13   0  243.28   30.50
  12  13   0  261.87   29.00
  12  13   0  239.78   31.00
 -12  13   0  309.87   32.90
  12  13   0  270.67   30.60
  12  13   0  328.87   35.00
 -12  13   0  226.78   29.90
  13 -13   0  224.98   31.80
 -13 -13   0  191.88   19.90
 -13 -13   0  239.08   30.50
  13 -13   0  174.78   27.90
  13 -13   0  185.28   23.60
  13 -13   0  214.88   30.50
 -13 -13   0  161.58   27.80
 -13  13   0  214.98   22.10
 -13  13   0  188.78   28.40
  13  13   0  158.28   25.50
  13  13   0  202.78   35.30
 -13  13   0  232.58   28.80
  13  13   0  143.59   25.90
  14 -13   0  -20.90   19.30
 -14 -13   0   18.00   21.00
 -14 -13   0   31.70   13.10
  14 -13   0    1.70   16.90
  14 -13   0   35.50   22.90
  14 -13   0    3.60   22.10
 -14 -13   0   11.90   21.50
  14  13   0   -3.90   19.40
 -14  13   0   25.20   19.60
  14  13   0   43.20   21.40
 -14  13   0  -15.90   17.00
 -14  13   0   -1.70   11.90
  14  13   0   46.50   18.80
  14  13   0  -13.80   19.70
  15 -13   0   82.79   20.30
 -15 -13   0    7.30   12.20
 -15 -13   0   38.10   23.60
  15 -13   0   37.00   23.70
  15 -13   0   30.00   20.80
  15 -13   0   23.00   17.90
 -15 -13   0   48.30   22.90
 -15  13   0   56.59   22.00
  15  13   0    7.00   19.20
 -15  13   0   38.20   22.70
  15  13   0  -16.40   20.10
  15  13   0   13.30   16.40
 -15  13   0   10.60   11.60
  15  13   0   30.10   22.90
 -16 -13   0   71.29   16.70
  16 -13   0   48.20   18.50
 -16 -13   0   23.90   23.20
  16 -13   0   46.20   25.30
  16 -13   0   43.40   23.30
 -16  13   0   15.90   21.80
  16  13   0   32.80   18.20
  16  13   0   11.20   19.90
 -16  13   0   30.90   12.30
 -16  13   0   41.80   23.60
  16  13   0    8.40   16.90
   0 -14   0  163.78   16.60
   0 -14   0  160.58   24.90
   0 -14   0  136.59   21.00
   0 -14   0  183.78   26.80
   0  14   0  107.19   19.60
   0  14   0  173.78   25.40
   0  14   0  116.89   16.30
   0  14   0  158.78   24.20
  -1 -14   0   81.39   19.50
  -1 -14   0   67.29   25.90
   1 -14   0   37.30   18.00
   1 -14   0   96.69   14.00
   1 -14   0   57.49   20.10
   1 -14   0  110.89   22.60
  -1 -14   0   39.30   19.30
  -1  14   0  101.49   18.80
  -1  14   0   69.79   18.00
   1  14   0   63.29   14.80
   1  14   0   64.49   20.20
   1  14   0   48.10   16.20
  -1  14   0   78.39   17.40
   1  14   0   47.10   19.20
  -1  14   0   83.19   13.50
  -2 -14   0    4.90   16.40
   2 -14   0   -9.60   15.60
  -2 -14   0   -9.00   16.80
  -2 -14   0    9.50   10.70
   2 -14   0   -7.10   14.40
  -2 -14   0   38.60   23.10
   2 -14   0    5.70   10.60
   2 -14   0   -4.40   17.30
   2  14   0  -22.60   15.20
  -2  14   0    7.00   12.50
  -2  14   0   16.40   14.00
   2  14   0   25.60   18.00
   2  14   0  -13.40   11.80
  -2  14   0  -20.20   15.70
  -2  14   0   -6.50   16.10
   2  14   0   13.80   13.70
  -3 -14   0  156.68   24.50
  -3 -14   0  161.18   23.30
   3 -14   0  199.78   23.30
   3 -14   0  152.88   25.40
   3 -14   0  226.98   28.60
   3 -14   0  153.38   17.60
  -3 -14   0  198.88   17.30
  -3 -14   0  126.99   29.70
   3  14   0  196.08   26.30
  -3  14   0  194.48   25.50
   3  14   0  209.88   21.10
   3  14   0  151.58   22.30
   3  14   0  126.99   24.50
   3  14   0  169.58   26.10
  -3  14   0  126.39   27.20
  -3  14   0  188.38   16.10
   4 -14   0   31.10   20.40
   4 -14   0  -14.50   10.50
  -4 -14   0   18.80   21.00
   4 -14   0   27.40   19.40
  -4 -14   0   -5.70    9.40
   4 -14   0   -3.90   14.30
   4  14   0    8.60   13.10
  -4  14   0   12.20   16.70
   4  14   0   41.60   18.50
   4  14   0   20.60   19.10
   4  14   0   -8.50   14.70
  -4  14   0   10.50   17.60
   4  14   0   -2.10   15.50
  -4  14   0  -12.80    7.90
  -5 -14   0    8.10   10.40
  -5 -14   0    6.60   16.30
   5 -14   0    0.70   12.50
   5 -14   0   37.30   16.90
  -5 -14   0  -13.90   16.50
   5 -14   0  -16.70   13.30
   5 -14   0   -9.70   17.30
   5  14   0   -4.20   16.40
  -5  14   0   -8.20   14.00
  -5  14   0    0.70    7.30
  -5  14   0   12.60   18.10
   5  14   0   34.40   15.30
   5  14   0    9.70   15.20
   5  14   0   -3.40   15.50
   5  14   0   14.60   14.60
  -6 -14   0   62.29   22.90
  -6 -14   0  122.49   23.50
   6 -14   0  127.79   20.50
   6 -14   0  118.09   24.50
   6 -14   0  125.39   24.20
  -6 -14   0   94.19   14.00
   6 -14   0  135.49   18.30
  -6  14   0  119.89   11.00
   6  14   0  126.79   19.40
   6  14   0  103.99   20.00
   6  14   0  144.29   21.40
  -6  14   0  126.69   23.50
   6  14   0  111.59   23.70
   6  14   0  156.98   24.70
  -6  14   0  151.88   22.50
  -6  14   0  146.49   24.90
   7 -14   0  228.08   23.60
   7 -14   0  174.88   23.30
   7 -14   0  214.18   27.20
   7 -14   0  197.48   28.60
  -7 -14   0  259.47   29.20
  -7 -14   0  178.58   28.60
  -7  14   0  205.48   12.10
  -7  14   0  177.58   26.30
   7  14   0  235.58   29.60
   7  14   0  199.68   25.40
   7  14   0  189.28   27.70
   7  14   0  168.48   26.50
   7  14   0  192.98   23.40
  -7  14   0  225.88   29.10
  -7  14   0  194.38   24.60
   8 -14   0   42.90   22.00
  -8 -14   0   38.10   20.30
   8 -14   0   61.19   17.70
  -8 -14   0   67.19   23.20
   8 -14   0   47.10   15.80
   8 -14   0   60.29   21.90
   8  14   0   22.90   16.50
   8  14   0   30.90   19.30
   8  14   0   52.79   20.40
  -8  14   0   31.50    4.60
  -8  14   0   41.70    6.70
  -8  14   0   40.60   17.10
   8  14   0   54.19   22.10
  -8  14   0   47.50   18.50
  -8  14   0   73.19   22.10
   9 -14   0   44.60   22.20
  -9 -14   0   58.49   21.10
  -9 -14   0   56.89   21.80
   9 -14   0   14.20   21.50
   9 -14   0   36.00   17.40
  -9 -14   0   19.20   11.10
   9  14   0    1.10   17.00
  -9  14   0   24.60   15.90
  -9  14   0   34.70   20.50
   9  14   0   40.90   21.00
   9  14   0   32.10   21.20
   9  14   0   20.40   19.50
  -9  14   0    5.90   18.70
  10 -14   0   22.50   21.30
 -10 -14   0   43.30   12.50
 -10 -14   0   33.70   21.00
  10 -14   0   14.00   21.50
 -10 -14   0   69.69   23.10
  10  14   0   59.29   19.40
  10  14   0   41.70   21.30
  10  14   0   41.90   20.90
 -10  14   0   49.50   16.70
 -10  14   0   68.09   21.00
  10  14   0   85.99   20.20
 -10  14   0   49.90   20.90
  11 -14   0   37.60   20.50
  11 -14   0   41.50   24.20
 -11 -14   0   46.10   20.80
  11 -14   0   52.19   17.60
 -11 -14   0   36.40   12.50
  11 -14   0   20.90   20.80
 -11 -14   0   42.40   23.30
 -11  14   0   -3.60   19.20
  11  14   0   52.29   20.70
  11  14   0    8.80   15.30
  11  14   0   47.40   22.10
 -11  14   0   44.50   20.30
 -11  14   0   41.50   16.10
  11  14   0   70.49   21.60
  12 -14   0   39.70   18.50
  12 -14   0   79.39   23.90
  12 -14   0   35.70   24.90
 -12 -14   0   48.40   18.20
 -12 -14   0    6.70   21.50
 -12 -14   0   72.59   14.10
  12 -14   0   34.00   21.70
  12  14   0   90.69   24.90
  12  14   0   55.69   22.10
  12  14   0   60.49   21.50
 -12  14   0   69.29   22.40
 -12  14   0   59.89   21.50
 -12  14   0   70.69   18.10
  12  14   0   50.89   20.50
  13 -14   0    3.90   22.50
  13 -14   0   42.80   21.50
  13 -14   0   20.50   17.90
 -13 -14   0    5.60   21.60
 -13 -14   0   32.10   22.90
  13 -14   0   34.20   22.00
  13  14   0   65.09   23.70
  13  14   0   78.69   25.30
  13  14   0   48.70   20.30
 -13  14   0   35.20   22.50
 -13  14   0   50.19   16.50
 -13  14   0   33.50   20.40
  13  14   0   24.10   20.40
 -13  14   0   69.99   24.90
  14 -14   0  -14.90   16.80
 -14 -14   0   12.90   12.50
 -14 -14   0  -13.50   21.40
  14  14   0   17.20   21.50
  14  14   0  -51.29   16.10
 -14  14   0  -18.00   18.20
  14  14   0   34.90   20.70
  14  14   0  -27.10   19.10
 -14  14   0    3.40   22.00
 -14  14   0   -3.20   13.50
  15 -14   0   20.40   25.30
  15 -14   0   42.40   24.80
  15 -14   0   18.60   18.60
 -15 -14   0   49.40   24.30
  15 -14   0   16.50   24.60
 -15 -14   0   16.90   22.80
 -15 -14   0   37.90   13.90
 -15  14   0   30.30   14.80
  15  14   0   50.39   23.50
  15  14   0   32.30   23.20
 -15  14   0   48.60   24.70
 -15  14   0   41.60   23.10
  15  14   0   55.69   25.10
   0 -15   0   29.90   20.40
   0 -15   0   14.90   11.30
   0 -15   0    2.90   17.30
   0 -15   0   -5.10   19.70
   0  15   0   -8.50   16.40
   0  15   0  -13.90   16.00
   0  15   0    4.90   11.40
   0  15   0  -33.40   16.00
   1 -15   0  155.98   28.00
  -1 -15   0  223.18   29.10
  -1 -15   0  187.18   30.00
  -1 -15   0  229.28   27.40
   1 -15   0  210.28   28.90
   1 -15   0  244.88   31.40
  -1 -15   0  226.28   19.40
   1 -15   0  212.08   20.00
  -1  15   0  197.78   18.90
   1  15   0  265.87   22.90
   1  15   0  212.68   28.80
   1  15   0  195.88   28.40
  -1  15   0  256.57   29.40
  -1  15   0  233.98   29.50
  -1  15   0  218.48   29.40
   1  15   0  237.38   28.30
   2 -15   0   40.90   21.50
   2 -15   0   45.70   12.50
  -2 -15   0   41.60   11.70
  -2 -15   0   43.60   20.90
  -2 -15   0   51.49   23.50
   2 -15   0   10.20   20.20
  -2 -15   0  -14.20   17.30
  -2  15   0   16.50   18.20
   2  15   0   12.00   19.00
   2  15   0   32.90   20.60
  -2  15   0   38.70   11.60
  -2  15   0   15.20   19.50
   2  15   0   27.70   14.60
   2  15   0    6.50   18.20
  -2  15   0   29.70   18.60
   3 -15   0  349.07   35.10
  -3 -15   0  335.37   35.70
  -3 -15   0  372.16   33.70
   3 -15   0  326.37   32.60
  -3 -15   0  356.56   34.40
   3 -15   0  306.67   24.20
  -3 -15   0  341.87   33.60
   3  15   0  342.27   33.70
   3  15   0  315.77   32.50
  -3  15   0  418.96   35.10
   3  15   0  364.16   26.10
  -3  15   0  264.17   29.70
   3  15   0  394.06   35.40
  -3  15   0  347.17   32.40
  -4 -15   0   -0.90   20.30
   4 -15   0   22.50   13.80
   4 -15   0   -5.00   19.00
   4 -15   0   35.80   21.60
  -4 -15   0    2.40   18.70
  -4  15   0   54.39   21.30
  -4  15   0   17.40    9.10
  -4  15   0   13.40   15.40
   4  15   0   18.30   18.40
  -4  15   0   -0.70   16.60
   4  15   0   58.39   22.20
   4  15   0   18.80   19.70
   4  15   0   24.00   15.60
   5 -15   0   25.20   21.20
   5 -15   0   13.40   19.60
   5 -15   0   37.20   14.00
  -5 -15   0    7.30   18.70
   5 -15   0   21.90   21.20
  -5 -15   0    3.30   20.60
   5  15   0   24.40   15.30
  -5  15   0   10.70    7.60
  -5  15   0   40.60   19.10
   5  15   0   13.60   20.30
   5  15   0   30.90   15.40
  -5  15   0   11.40   17.10
  -5  15   0   19.20   19.80
   5  15   0   13.90   19.80
   6 -15   0   89.09   17.60
  -6 -15   0   62.99   22.70
   6 -15   0   59.19   21.70
  -6 -15   0   73.79   21.80
   6 -15   0   86.19   20.00
   6 -15   0   15.90   22.00
  -6  15   0   38.10    7.90
  -6  15   0   48.70   19.90
  -6  15   0   57.89   19.30
   6  15   0   36.30   21.50
   6  15   0   33.60   20.20
   6  15   0   71.79   21.70
  -6  15   0   58.09   18.40
   7 -15   0   -0.20   14.10
   7 -15   0    6.90   20.30
   7 -15   0   -3.10   18.30
  -7 -15   0    1.50   19.30
   7 -15   0    9.30   16.20
  -7 -15   0    7.80   18.30
   7  15   0   29.40   21.40
   7  15   0   13.00   20.00
   7  15   0  -26.90   15.80
  -7  15   0   -0.80   18.10
  -7  15   0  -11.60    4.70
   7  15   0    8.80   19.10
  -7  15   0  -12.70   18.50
  -7  15   0   -1.50   16.30
  -8 -15   0   37.30   11.50
   8 -15   0   37.50   16.70
  -8 -15   0   57.39   21.70
  -8 -15   0   11.10   17.50
   8 -15   0   34.90   21.60
   8 -15   0   37.80   18.80
   8 -15   0   65.39   22.70
   8  15   0   50.79   20.20
  -8  15   0    2.20   17.90
   8  15   0   18.60   18.00
  -8  15   0   26.60   17.70
   8  15   0   31.30   21.50
   8  15   0   36.20   21.80
  -8  15   0   17.50   15.50
   9 -15   0   28.50   20.70
  -9 -15   0  -15.00   18.40
   9 -15   0  -23.60   20.70
  -9 -15   0   18.70   11.10
   9 -15   0    5.90   16.20
  -9 -15   0  -20.90   19.50
  -9  15   0  -13.80   13.40
  -9  15   0  -16.80   15.50
  -9  15   0    9.50   18.00
   9  15   0   -8.90   17.40
   9  15   0    3.90   15.30
   9  15   0    9.00   19.20
   9  15   0   50.69   19.30
 -10 -15   0   39.00   23.80
  10 -15   0   -4.70   22.60
  10 -15   0    7.90   18.30
 -10 -15   0   40.30   22.20
  10 -15   0  -11.40   14.90
  10 -15   0    8.80   22.30
 -10 -15   0    4.50   10.40
  10  15   0   -6.60   19.80
 -10  15   0  -13.20   16.10
  10  15   0   32.60   21.80
 -10  15   0   -6.00   19.20
  10  15   0   10.30   18.90
 -11 -15   0   48.90   25.40
 -11 -15   0   82.09   25.00
  11 -15   0   36.70   25.00
 -11 -15   0   75.09   13.40
  11 -15   0   49.10   24.00
  11 -15   0   34.50   18.70
  11  15   0   94.79   26.20
  11  15   0   39.60   18.70
  11  15   0   54.69   22.20
 -11  15   0   70.39   23.70
  11  15   0   87.29   24.90
 -11  15   0   80.99   19.50
 -12 -15   0  169.18   31.70
  12 -15   0   73.59   33.10
  12 -15   0   89.09   20.70
 -12 -15   0  120.29   15.10
  12 -15   0   56.29   31.50
 -12 -15   0  127.79   29.50
  12  15   0   52.19   20.40
 -12  15   0   68.89   19.00
 -12  15   0  133.69   26.70
  12  15   0  100.49   24.40
  12  15   0  102.19   25.90
  12  15   0   48.00   23.70
  13 -15   0   42.50   20.30
  13 -15   0   -1.90   22.70
 -13 -15   0   59.89   13.30
  13 -15   0   32.40   25.10
 -13 -15   0   36.50   25.70
  13 -15   0   18.10   25.50
 -13 -15   0   92.49   26.00
 -13  15   0   54.29   23.30
  13  15   0   25.70   18.30
  13  15   0   84.29   26.90
 -13  15   0   31.90   16.20
  13  15   0   55.39   24.20
   0 -16   0    5.50   11.30
   0 -16   0   58.79   20.00
   0 -16   0   17.30   19.10
   0 -16   0   18.00   21.50
   0  16   0    0.20   19.50
   0  16   0  -10.90   18.40
   0  16   0    1.30   13.40
   0  16   0    0.10   11.60
  -1 -16   0  -10.10   19.20
  -1 -16   0   -5.10   18.90
   1 -16   0  -18.70   16.60
  -1 -16   0   -6.30   10.40
   1 -16   0   16.00   19.90
   1 -16   0   -0.20   12.00
   1 -16   0  -41.20   12.90
  -1 -16   0   31.10   23.00
  -1  16   0  -10.80   13.60
   1  16   0  -15.20   17.60
   1  16   0   -3.50   12.80
  -1  16   0  -14.70   17.60
  -1  16   0  -20.50   10.10
   1  16   0   11.40   19.60
   1  16   0   -2.00   18.40
  -1  16   0  -13.70   18.00
  -2 -16   0  159.18   28.60
  -2 -16   0   80.49   22.00
   2 -16   0  112.39   26.60
   2 -16   0  123.19   27.20
   2 -16   0   57.49   14.50
   2 -16   0  147.59   24.00
  -2 -16   0  109.29   14.60
  -2 -16   0   94.29   24.80
  -2  16   0  152.18   25.90
  -2  16   0  115.49   15.40
  -2  16   0   82.69   23.90
   2  16   0   93.09   24.20
   2  16   0  112.69   25.60
   2  16   0  117.99   19.20
   2  16   0  137.49   27.30
  -2  16   0  163.18   27.50
   3 -16   0  119.69   27.30
   3 -16   0   68.29   15.50
  -3 -16   0   71.69   25.60
  -3 -16   0   90.89   24.30
   3 -16   0   92.49   22.40
   3 -16   0   73.39   25.80
  -3 -16   0   63.49   13.10
  -3 -16   0   73.69   21.70
  -3  16   0   60.79   23.40
   3  16   0   42.80   21.70
   3  16   0   78.69   23.50
   3  16   0   39.20   15.50
  -3  16   0   77.79   12.70
  -3  16   0   61.59   21.50
   3  16   0   50.69   20.30
  -3  16   0  108.99   26.00
   4 -16   0   79.29   24.40
   4 -16   0   88.39   25.60
  -4 -16   0   73.39   13.70
  -4 -16   0   57.99   24.20
  -4 -16   0  108.09   24.40
   4 -16   0   80.39   21.30
   4 -16   0  106.59   17.50
  -4  16   0  101.29   22.60
   4  16   0   66.89   23.70
   4  16   0   65.09   18.40
  -4  16   0   75.99   12.00
   4  16   0   69.39   22.10
   4  16   0   94.19   24.30
  -4  16   0  110.99   25.40
  -4  16   0   81.09   19.20
   5 -16   0   28.30   18.80
  -5 -16   0   42.50   13.50
   5 -16   0   34.90   15.00
  -5 -16   0   37.30   21.50
   5 -16   0   63.09   43.70
  -5 -16   0   46.00   24.30
   5 -16   0   43.40   23.40
  -5  16   0   26.10    8.40
  -5  16   0   56.29   22.50
   5  16   0   18.20   21.00
   5  16   0   43.40   17.00
   5  16   0   58.79   23.90
  -5  16   0   48.70   20.60
   5  16   0   49.20   24.10
  -5  16   0   30.40   20.90
   6 -16   0  290.17   34.70
   6 -16   0  169.08   21.60
  -6 -16   0  195.28   28.50
  -6 -16   0  302.17   37.10
   6 -16   0  211.18   32.10
  -6 -16   0  187.38   23.80
   6 -16   0  229.38   27.30
   6  16   0  211.88   30.40
   6  16   0  151.78   29.80
  -6  16   0  221.18   28.10
  -6  16   0  208.28   13.40
   6  16   0  202.98   31.00
  -6  16   0  207.98   27.50
   6  16   0  204.58   26.00
  -6  16   0  181.48   29.30
  -7 -16   0   15.90   23.40
   7 -16   0  -24.80   20.20
   7 -16   0   18.40   17.90
   7 -16   0   -1.60   13.70
  -7 -16   0    5.80   12.10
  -7 -16   0    7.20   19.00
   7 -16   0   25.60   22.60
   7  16   0   51.19   23.90
   7  16   0   17.40   21.00
   7  16   0    6.50   17.20
  -7  16   0   46.60   20.80
  -7  16   0    3.20   18.10
   7  16   0   -1.50   18.90
  -7  16   0   -7.40   18.30
  -8 -16   0  112.19   25.30
   8 -16   0  114.99   23.10
  -8 -16   0  110.19   30.10
   8 -16   0  136.39   29.40
   8 -16   0  122.89   22.90
  -8 -16   0   86.09   13.80
   8 -16   0   92.09   26.40
  -8  16   0  146.79   28.30
  -8  16   0  108.29   23.60
  -8  16   0  143.99   27.30
   8  16   0  112.09   26.50
   8  16   0  101.79   22.80
   8  16   0  111.69   27.00
  -9 -16   0   28.70   23.10
  -9 -16   0  -17.00   21.00
   9 -16   0   45.50   30.70
  -9 -16   0   12.00   10.90
   9 -16   0  -12.70   16.00
   9 -16   0   35.20   17.90
   9  16   0   22.40   28.10
  -9  16   0   16.40   15.60
   9  16   0   14.90   19.30
   9  16   0   -3.70   21.30
  -9  16   0   -6.20   18.60
  -9  16   0   35.20   21.90
  10 -16   0  293.67   36.70
 -10 -16   0  368.66   42.00
  10 -16   0  312.97   39.50
  10 -16   0  324.97   31.30
  10 -16   0  353.46   30.50
 -10  16   0  369.76   31.90
 -10  16   0  346.27   38.00
  10  16   0  455.65   38.70
  10  16   0  298.07   35.50
 -10  16   0  278.97   33.70
  10  16   0  336.57   38.10
  10  16   0  308.27   37.60
   0 -17   0   28.90   23.10
   0 -17   0   29.40   21.50
   0 -17   0  -15.40   10.80
   0 -17   0  -37.10   20.20
   0  17   0   -4.50   12.40
   0  17   0    2.00   20.80
   0  17   0  -38.90   16.80
   0  17   0    6.60   16.50
   1 -17   0   88.69   27.40
   1 -17   0   76.59   26.80
  -1 -17   0   78.49   14.70
  -1 -17   0   82.19   25.60
   1 -17   0   73.09   22.00
  -1 -17   0   85.19   25.10
   1 -17   0   43.10   13.60
  -1 -17   0   26.60   21.80
   1  17   0   84.59   25.60
   1  17   0   99.69   26.50
  -1  17   0   60.79   14.30
  -1  17   0   56.89   24.40
   1  17   0  100.69   25.10
  -1  17   0   62.99   23.40
  -1  17   0  102.29   26.80
   1  17   0   53.99   16.50
   2 -17   0   34.50   22.60
  -2 -17   0   20.30   23.70
   2 -17   0   14.80   18.00
  -2 -17   0    3.60   20.30
  -2 -17   0   -3.10   11.00
   2 -17   0    6.10   18.90
   2 -17   0    9.70   12.50
  -2 -17   0   48.10   23.70
   2  17   0   25.70   21.00
   2  17   0   -7.60   15.50
  -2  17   0   -5.90   19.10
   2  17   0   -8.90   14.40
  -2  17   0   53.69   22.00
  -2  17   0   11.50   11.90
   2  17   0   26.70   24.00
  -2  17   0   25.30   22.90
   3 -17   0   30.80   14.60
   3 -17   0  -19.90   34.90
   3 -17   0    6.40   22.10
  -3 -17   0   28.00   11.50
  -3 -17   0   38.10   21.90
  -3 -17   0   53.29   27.40
   3 -17   0   48.50   22.10
  -3  17   0   39.00   22.60
   3  17   0   28.80   21.80
   3  17   0   26.70   22.70
  -3  17   0   56.29   22.10
  -3  17   0   32.10   11.20
  -3  17   0   35.90   22.00
   4 -17   0   -9.80   19.00
   4 -17   0   17.50   14.20
   4 -17   0  -22.10   20.70
  -4 -17   0   -4.80   19.90
  -4 -17   0  -32.80   22.90
  -4 -17   0  -19.90   10.30
   4  17   0  -21.20   15.50
  -4  17   0    3.70   19.80
   4  17   0    8.80   21.70
  -4  17   0   21.20   21.10
  -4  17   0   12.80   20.10
  -5 -17   0   14.30   14.60
  -5 -17   0    0.20   23.30
   5 -17   0   40.70   26.40
  -5 -17   0   39.60   22.30
   5 -17   0   18.00   14.10
   5 -17   0   -0.30   19.70
  -5  17   0   35.50   24.00
   5  17   0   31.00   18.00
  -5  17   0    3.10   19.90
   5  17   0   27.20   18.50
   5  17   0   39.90   23.60
   5  17   0   38.10   23.90
  -5  17   0   60.89   23.30
   6 -17   0  -23.90   16.70
   6 -17   0   -5.90   23.20
   6 -17   0  -14.60   28.90
  -6 -17   0    8.00   20.30
   6 -17   0   -5.60   14.20
  -6 -17   0    9.10   22.50
   6  17   0    2.00   19.30
  -6  17   0   31.80   17.50
  -6  17   0   21.20   20.90
  -6  17   0   30.20   34.60
   6  17   0  -10.00   17.30
   6  17   0   10.80   22.20
   6  17   0    8.50   16.50
   7 -17   0   -1.70   22.20
   7 -17   0    8.00   15.40
   7 -17   0   20.10   27.30
  -7 -17   0   32.40   22.60
  -7 -17   0   11.70   22.70
   7 -17   0    2.60   19.60
   7  17   0  -35.40   19.90
  -7  17   0   -2.60   18.90
   7  17   0   15.40   17.30
   7  17   0   28.30   22.40
  -7  17   0    9.80   22.60
 -24   0   1    5.00   19.30
  24   0  -1   23.40   22.00
  24   0  -1    2.70   19.20
  24   0  -1  -30.60   17.00
  24   0  -1    2.60   19.60
  23   0  -1  -19.70   16.50
  23   0  -1   47.20   19.60
  23   0  -1   38.30   21.50
  23   0  -1   33.40   21.20
 -23   0   1   17.50   19.00
  22   0  -1  -23.00   16.50
  22   0  -1  -21.30   14.10
  22   0  -1    1.60   18.20
  22   0  -1    8.80   17.70
 -22   0   1  -40.80   15.00
  21   0  -1   19.80   16.90
  21   0  -1   -2.80   17.70
  21   0  -1  -21.30   14.10
  21   0  -1   25.40   17.60
 -21   0   1    2.60   15.80
 -20   0   1   -0.90   14.00
  20   0  -1   -0.70   14.00
  20   0  -1    2.80   15.90
  20   0  -1   34.70   15.80
  20   0  -1    2.60   15.30
  19   0  -1   90.09   18.60
  19   0  -1   58.29   17.50
  19   0  -1  101.69   20.30
 -19   0   1  106.69   19.80
  19   0  -1   95.19   17.20
 -18   0   1   -6.50   12.30
  18   0  -1    4.90   12.40
  18   0  -1   -1.20   13.30
  18   0  -1   22.30   14.90
  18   0  -1  -13.50   11.60
  17   0  -1   90.49   17.30
 -17   0   1   82.29   16.60
  17   0  -1   85.29   16.10
  17   0  -1   58.69   14.10
  17   0  -1   82.49   17.00
  17   0  -1  118.19   18.40
  16   0  -1    5.20   10.40
  16   0  -1    4.70   12.30
  16   0  -1  -16.60    9.30
 -16   0   1   -6.90    9.40
  16   0  -1    4.20   12.40
 -16   0   1   14.10   13.30
  16   0  -1  -13.40   11.00
  15   0  -1   75.19   15.10
 -15   0   1   68.39   13.70
  15   0  -1   67.49   14.70
  15   0  -1   59.49   13.20
 -15   0   1   75.09   15.10
  15   0  -1   54.49   13.90
  15   0  -1   79.69   13.80
 -15   0   1   61.99   12.00
 -15   0   1   83.59   13.10
  14   0  -1   11.80    9.60
  14   0  -1   -5.30    9.20
  14   0  -1   -7.80    9.80
 -14   0   1    4.40    8.30
 -14   0   1    1.70   10.20
 -14   0   1    8.80    9.80
 -14   0   1   -2.70   10.30
 -14   0   1   -0.90    8.20
  14   0  -1    9.80   10.00
  14   0  -1   -8.30    9.80
 -13   0   1  270.47    9.10
  13   0  -1  267.47   19.60
  13   0  -1  272.47   17.10
  13   0  -1  261.07   18.70
  13   0  -1  275.57   19.80
  13   0  -1  230.58   19.00
 -13   0   1  242.78    9.10
  13   0  -1  261.17   19.10
 -13   0   1  264.17   19.40
  13   0  -1  253.67   17.50
 -13   0   1  260.47   17.30
 -13   0   1  245.58   19.80
 -13   0   1  255.17   18.50
 -13   0   1  257.77   20.50
 -12   0   1   -0.80    2.20
  12   0  -1    2.70    6.80
  12   0  -1    2.00    7.50
 -12   0   1   -7.60    7.90
 -12   0   1   -0.90    8.30
  12   0  -1   14.20    8.30
  12   0  -1    4.00    7.60
 -12   0   1   -2.20    6.90
  12   0  -1   -0.70    6.20
  12   0  -1    1.90    8.10
 -12   0   1    1.30    8.10
  12   0  -1    1.50    6.20
 -12   0   1    8.40    7.20
 -11   0   1 3551.54  108.09
 -11   0   1 3524.15  115.59
 -11   0   1 3580.64  116.09
  11   0  -1 3508.75  115.89
  11   0  -1 3596.24  114.59
 -11   0   1 3658.03  115.09
 -11   0   1 3655.73  115.09
  11   0  -1 3466.85  115.49
  11   0  -1 3645.34  116.19
 -11   0   1 3631.74  116.79
  11   0  -1 3655.23  116.59
  11   0  -1 3580.14  116.19
  10   0  -1    9.40    6.70
 -10   0   1   -0.40    5.90
 -10   0   1    2.20    8.20
  10   0  -1   -1.30    7.20
 -10   0   1   -3.40    6.60
 -10   0   1   -1.20    7.10
  10   0  -1   -5.80    6.90
  10   0  -1    1.70    6.90
 -10   0   1    1.80    2.30
  10   0  -1   -1.10    5.60
 -10   0   1   -3.70    5.50
  10   0  -1    5.50    7.20
   9   0  -1 5315.47  163.38
  -9   0   1 5310.27  162.28
   9   0  -1 5295.17  162.08
  -9   0   1 5190.28  163.08
   9   0  -1 5183.58  163.08
  -9   0   1 5177.98  162.78
   9   0  -1 5310.47  163.08
   9   0  -1 5312.97  163.48
   9   0  -1 5168.68  163.08
  -9   0   1 5229.48  156.98
  -9   0   1 5155.18  163.58
   8   0  -1   11.80    6.90
  -8   0   1    1.40    5.80
   8   0  -1   -0.70    6.20
   8   0  -1    0.70    5.30
   8   0  -1    5.70    6.50
   8   0  -1    0.70    5.50
  -8   0   1   -1.00    5.70
  -8   0   1    8.50    7.20
  -8   0   1    1.20    2.10
   8   0  -1   -0.50    4.50
  -7   0   1 1281.77   43.00
   7   0  -1 1253.07   42.90
  -7   0   1 1270.97   39.20
  -7   0   1 1287.67   43.20
  -7   0   1 1303.97   43.80
   7   0  -1 1239.38   43.50
   7   0  -1 1259.67   43.60
   7   0  -1 1284.07   44.00
   7   0  -1 1278.57   44.00
   7   0  -1 1228.78   43.20
  -7   0   1 1354.26   44.50
  -7   0   1 1281.17   43.50
   6   0  -1    0.80    4.20
   6   0  -1    2.80    3.80
  -6   0   1   -1.60    4.20
  -6   0   1    0.70    3.00
   6   0  -1    0.30    3.80
  -6   0   1    2.70    3.70
  -6   0   1    1.90    4.90
  -6   0   1   -1.70    1.50
   6   0  -1   -4.00    3.10
   6   0  -1   -1.90    4.40
  -6   0   1    3.20    4.20
   6   0  -1   -0.10    3.20
  -5   0   1  115.29    7.00
  -5   0   1   99.89    8.20
  -5   0   1  111.89    7.60
   5   0  -1  118.79    7.80
  -5   0   1  118.19    4.70
   5   0  -1  121.09    7.20
   5   0  -1  119.09    7.70
   5   0  -1  122.99    7.50
  -5   0   1   94.59    8.40
   5   0  -1  118.09    4.70
  -5   0   1  118.09    7.50
   5   0  -1  128.59    8.40
   5   0  -1  124.39    8.40
  -4   0   1    2.20    3.10
   4   0  -1    3.00    2.90
  -4   0   1    0.10    1.30
   4   0  -1   -7.70    3.40
  -4   0   1   -2.80    3.00
  -4   0   1    2.30    3.20
   4   0  -1   -0.80    3.00
   4   0  -1    7.40    3.30
   4   0  -1    1.40    3.10
  -4   0   1    2.70    3.50
  -4   0   1    0.60    3.70
   4   0  -1   -3.30    3.40
   4   0  -1    1.80    1.20
  -4   0   1    0.80    2.90
  -3   0   1   13.20    2.70
  -3   0   1   20.20    2.90
   3   0  -1   14.30    2.70
  -3   0   1   13.20    3.20
   3   0  -1   11.60    3.10
  -3   0   1   18.10    1.50
   3   0  -1   19.00    3.00
   3   0  -1   14.10    1.40
   3   0  -1   10.30    3.60
  -3   0   1   19.60    2.90
   3   0  -1   17.80    3.00
  -3   0   1   16.30    2.90
   2   0  -1    0.20    0.70
  -2   0   1   -0.50    1.10
  -2   0   1    0.50    1.40
   2   0  -1    1.60    1.40
  -2   0   1    0.70    0.80
   2   0  -1   -0.50    1.10
   2   0  -1   -0.30    1.10
  -2   0   1    2.20    1.30
   2   0  -1    2.40    1.90
   2   0  -1   -0.70    1.30
   1   0   1  723.03   23.20
  -1   0  -1  714.13   23.30
  -1   0  -1  742.63   23.30
  -1   0  -1  746.63   22.80
   1   0   1  764.72   22.80
  -1   0  -1  688.73   23.80
   1   0   1  712.53   22.70
  -1   0  -1  773.42   23.40
   1   0   1  734.33   23.40
   1   0   1  725.73   23.20
  -2   0  -1    0.90    2.50
   2   0   1   -2.10    2.40
  -2   0  -1    1.60    1.80
   2   0   1    0.30    2.40
   2   0   1   -0.80    1.80
   2   0   1    1.10    2.10
   2   0   1    1.20    1.90
  -2   0  -1    5.70    2.00
  -2   0  -1    4.10    2.80
   2   0   1    0.70    2.30
  -2   0  -1    1.70    2.10
  -3   0  -1  806.62   25.90
   3   0   1  775.32   26.90
   3   0   1  781.22   26.90
   3   0   1  782.62   26.10
  -3   0  -1  781.82   26.80
   3   0   1  795.82   26.40
  -3   0  -1  806.22   26.80
  -3   0  -1  776.22   26.90
   3   0   1  806.72   26.10
  -3   0  -1  783.22   26.20
  -3   0  -1  782.02   26.90
   3   0   1  802.22   27.00
   4   0   1    3.10    3.50
  -4   0  -1    0.00    3.00
   4   0   1   -3.60    4.10
  -4   0  -1   -3.40    2.80
  -4   0  -1    1.90    3.00
  -4   0  -1    0.80    3.20
  -4   0  -1    1.70    4.50
   4   0   1   -2.50    3.40
   4   0   1    1.10    3.80
  -4   0  -1   -2.20    3.50
   4   0   1    2.80    4.30
   4   0   1   -2.30    3.10
   5   0   1  639.54   23.10
   5   0   1  620.84   23.10
  -5   0  -1  631.54   24.20
   5   0   1  625.44   22.90
  -5   0  -1  690.23   23.20
   5   0   1  629.04   23.60
   5   0   1  606.24   23.80
  -5   0  -1  624.04   23.50
  -5   0  -1  616.84   25.10
  -5   0  -1  657.23   23.30
  -5   0  -1  618.44   24.00
   5   0   1  602.04   23.90
   5   0   1  626.04   23.60
  -6   0  -1   -3.30    4.10
  -6   0  -1   -6.80    5.10
  -6   0  -1    7.40    4.30
  -6   0  -1   -0.10    3.80
   6   0   1    1.50    4.50
  -6   0  -1    0.20    2.50
   6   0   1   -5.20    4.20
   6   0   1    1.80    5.20
   6   0   1    8.70    5.70
  -6   0  -1   -0.50    5.20
   6   0   1   -1.80    4.20
   6   0   1   -1.00    5.80
   6   0   1   -4.00    3.60
   7   0   1 1015.10   36.30
  -7   0  -1  974.50   31.60
  -7   0  -1  930.11   36.10
  -7   0  -1  990.10   36.20
   7   0   1 1009.00   35.00
   7   0   1  981.40   35.10
   7   0   1  913.11   35.40
   7   0   1 1036.60   36.40
  -7   0  -1  934.01   35.40
   7   0   1  977.80   36.00
   8   0   1   -3.40    6.00
   8   0   1   -4.00    6.20
  -8   0  -1   -1.60    5.20
  -8   0  -1    1.70    6.70
   8   0   1    2.90    6.60
   8   0   1    0.10    5.90
   8   0   1    8.40    6.70
  -8   0  -1    1.70    5.10
   8   0   1    3.70    7.30
  -8   0  -1   -0.10    5.50
   8   0   1   12.90    5.90
  -8   0  -1    7.50    5.90
  -8   0  -1    2.10    3.20
   9   0   1  712.93   29.40
  -9   0  -1  665.33   27.70
  -9   0  -1  699.13   29.90
   9   0   1  646.94   29.00
   9   0   1  662.83   27.90
  -9   0  -1  692.73   28.80
   9   0   1  677.53   29.40
   9   0   1  713.73   28.20
  -9   0  -1  658.13   28.20
  -9   0  -1  720.93   28.90
  -9   0  -1  656.43   23.30
   9   0   1  658.93   29.20
   9   0   1  700.13   28.10
  10   0   1    4.90    8.30
  10   0   1   -3.80    6.80
  10   0   1    5.10    8.00
  10   0   1   -0.30    6.90
 -10   0  -1    5.90    7.10
 -10   0  -1    0.20    3.50
 -10   0  -1   -1.30    8.60
 -10   0  -1    1.30    6.20
  10   0   1   -5.60    6.70
 -10   0  -1   -5.00    5.00
  10   0   1   -6.80    4.60
 -10   0  -1   -0.10    6.60
  10   0   1   -6.60    7.40
 -11   0  -1  494.15   23.90
 -11   0  -1  501.45   24.50
 -11   0  -1  441.66   29.90
 -11   0  -1  461.15   17.70
  11   0   1  458.25   24.70
  11   0   1  484.45   23.70
 -11   0  -1  474.05   23.30
  11   0   1  436.26   23.30
  11   0   1  483.85   23.80
  11   0   1  470.55   23.40
  11   0   1  490.15   28.50
  11   0   1  498.85   25.70
 -11   0  -1  518.65   24.40
  12   0   1   14.80    8.40
  12   0   1   10.00    9.80
 -12   0  -1   -4.40    7.10
  12   0   1    6.70    9.10
  12   0   1    7.90    8.70
 -12   0  -1    4.90    3.90
 -12   0  -1   -5.50    6.90
 -12   0  -1    1.50    7.70
  12   0   1    3.50    8.90
  12   0   1    9.00    8.80
  12   0   1    2.70   10.30
 -12   0  -1  -12.50    5.20
 -13   0  -1  455.35   25.90
  13   0   1  504.45   27.50
  13   0   1  493.25   29.20
  13   0   1  472.95   26.70
  13   0   1  454.15   24.90
  13   0   1  438.56   24.60
 -13   0  -1  464.75   17.70
 -13   0  -1  452.85   25.20
 -13   0  -1  490.75   27.10
 -13   0  -1  477.85   25.00
 -13   0  -1  460.25   24.90
  14   0   1    0.10    9.60
  14   0   1   15.60   10.70
 -14   0  -1    5.30   11.10
 -14   0  -1   -3.60    3.80
 -14   0  -1    1.00    8.70
  14   0   1    6.80   10.70
  14   0   1    9.90    9.70
  14   0   1   -1.10   12.10
 -14   0  -1   -6.50    6.30
 -14   0  -1   -0.80    8.40
 -14   0  -1   -1.80    3.50
 -14   0  -1    6.40   10.30
 -15   0  -1    3.70   11.70
 -15   0  -1    3.60    3.80
 -15   0  -1  -21.40   11.20
  15   0   1   16.80   11.70
  15   0   1    9.60   11.90
  15   0   1   -1.20   12.80
 -15   0  -1    4.30    3.90
  15   0   1   -2.00   11.10
  15   0   1   -7.50    9.50
  16   0   1   14.60   12.50
 -16   0  -1   14.10   14.60
  16   0   1   16.90   14.60
 -16   0  -1   -4.60    2.90
  16   0   1    5.50   12.20
  16   0   1   28.60   13.20
 -16   0  -1    6.90   12.40
  17   0   1    7.40   13.00
  17   0   1   17.30   13.10
  17   0   1   -1.10   12.90
  17   0   1  -10.50   13.70
 -17   0  -1   -0.90   14.50
 -17   0  -1   12.90   13.00
  18   0   1   17.60   14.30
  18   0   1   14.20   13.90
 -18   0  -1  -18.60   15.00
 -18   0  -1  -11.50   12.60
  18   0   1  -19.10   13.00
  18   0   1   -4.40   15.70
  19   0   1    9.10   14.20
  19   0   1   17.00   15.30
  19   0   1   16.00   17.10
 -19   0  -1    1.40   17.00
 -19   0  -1   14.20   15.10
  19   0   1    2.50   15.00
  20   0   1   -1.30   15.40
  20   0   1    6.90   15.90
  20   0   1    1.30   16.40
  20   0   1   -0.40   17.30
 -20   0  -1  -16.00   15.70
 -21   0  -1  187.48   26.70
  21   0   1  231.68   26.10
  21   0   1  250.57   30.00
  21   0   1  204.68   28.00
  21   0   1  236.08   26.50
  22   0   1   -8.50   16.60
  22   0   1  -12.10   18.60
  22   0   1    3.20   16.90
  22   0   1   12.90   18.20
  23   0   1   21.10   20.40
 -23   0  -1   20.00   21.10
  23   0   1   30.70   22.40
  23   0   1   13.10   18.40
  23   0   1   15.70   19.20
 -24   0  -1   -3.20   21.60
  24   0   1   -9.50   14.80
  24   0   1   59.79   21.80
  24   0   1  -59.69   17.30
  24   0   1  -12.30   21.70
  24  -1  -1    4.80   21.40
  24  -1  -1   24.20   20.50
  24  -1  -1  -32.70   18.90
  24  -1  -1    3.20   17.20
 -24  -1   1   16.30   19.70
  24   1  -1    6.60   18.50
  24   1  -1   -1.50   18.00
  24   1  -1  -10.00   18.80
  24   1  -1  -15.10   12.50
 -24   1   1    9.00   18.60
  23  -1  -1   -2.20   15.20
  23  -1  -1   15.90   20.00
  23  -1  -1   12.50   20.20
  23  -1  -1  -29.00   16.20
 -23  -1   1  -24.10   17.90
  23   1  -1  -42.40   16.80
 -23   1   1   30.90   20.40
  23   1  -1    9.60   20.30
  23   1  -1   -5.50   18.40
  23   1  -1    8.00   18.30
  22  -1  -1    7.80   18.00
  22  -1  -1   21.30   17.40
  22  -1  -1   22.90   19.30
 -22  -1   1    7.80   17.40
  22  -1  -1   36.00   20.30
  22   1  -1    8.50   17.30
 -22   1   1   23.90   18.10
  22   1  -1    6.90   19.20
  22   1  -1    3.00   15.80
  22   1  -1   30.00   19.30
  21  -1  -1   61.49   19.00
 -21  -1   1   69.89   19.20
  21  -1  -1   46.60   19.80
  21  -1  -1   58.59   19.70
  21  -1  -1   40.10   16.90
  21   1  -1    7.80   16.60
 -21   1   1   35.50   18.50
  21   1  -1   10.50   17.90
  21   1  -1   11.20   16.10
  21   1  -1   43.00   17.90
  20  -1  -1  269.97   28.80
  20  -1  -1  254.17   26.00
  20  -1  -1  255.97   27.60
  20  -1  -1  277.37   24.90
 -20  -1   1  277.67   28.10
 -20   1   1  301.37   29.00
  20   1  -1  274.17   26.20
  20   1  -1  264.27   26.80
  20   1  -1  302.57   29.70
  20   1  -1  287.47   25.00
 -19  -1   1  114.49   20.80
  19  -1  -1  113.89   20.40
  19  -1  -1  138.19   21.90
  19  -1  -1  151.48   19.20
  19  -1  -1  131.69   19.00
  19   1  -1  114.99   21.10
  19   1  -1  141.79   20.20
  19   1  -1  155.68   22.80
  19   1  -1  146.99   21.50
 -19   1   1  105.69   20.40
 -18  -1   1  623.14   35.50
 -18  -1   1  611.04   36.60
  18  -1  -1  571.74   35.20
  18  -1  -1  637.14   32.70
  18  -1  -1  614.14   35.60
  18  -1  -1  583.34   35.70
  18   1  -1  546.45   35.20
 -18   1   1  605.54   35.40
  18   1  -1  601.14   34.90
  18   1  -1  596.34   34.70
  18   1  -1  606.34   35.90
 -17  -1   1   56.49    4.00
 -17  -1   1   25.50   14.10
  17  -1  -1   48.10   15.60
  17  -1  -1   51.69   15.70
 -17  -1   1   46.70    4.20
 -17  -1   1   65.09   15.00
  17  -1  -1   87.59   16.80
  17  -1  -1   47.70   13.40
  17  -1  -1   63.09   13.10
  17   1  -1   54.99   14.40
  17   1  -1   50.39   14.80
 -17   1   1   60.69   14.90
  17   1  -1   46.60   15.20
  17   1  -1   84.89   16.80
  17   1  -1   73.69   15.90
  16  -1  -1  209.48   19.30
 -16  -1   1  186.98    9.20
  16  -1  -1  218.48   21.60
  16  -1  -1  193.38   21.30
  16  -1  -1  184.08   20.70
 -16  -1   1  223.28   21.60
  16  -1  -1  177.98   19.80
 -16  -1   1  206.38   21.00
 -16  -1   1  181.08   20.80
  16   1  -1  208.08   21.80
 -16   1   1  180.88   23.80
  16   1  -1  219.08   21.60
  16   1  -1  193.78   20.50
  16   1  -1  228.28   20.80
 -16   1   1  211.28   21.90
  16   1  -1  166.88   18.50
  15  -1  -1   16.30   11.50
 -15  -1   1   20.40   10.60
  15  -1  -1   21.60   10.00
 -15  -1   1   10.60    8.80
  15  -1  -1   32.30   11.00
 -15  -1   1   24.20   12.50
  15  -1  -1   12.50   10.30
 -15  -1   1    7.30    4.10
  15  -1  -1   15.10   11.60
 -15   1   1   17.50    9.00
  15   1  -1   37.70   13.20
  15   1  -1   16.90   10.90
 -15   1   1   14.00    9.50
  15   1  -1   25.30   12.10
 -15   1   1   -2.90   11.70
  15   1  -1   18.50   11.10
  15   1  -1   15.60   10.50
  14  -1  -1  711.63   34.70
  14  -1  -1  716.53   33.30
 -14  -1   1  681.33   33.50
 -14  -1   1  727.13   32.60
 -14  -1   1  726.53   33.90
 -14  -1   1  694.53   34.00
  14  -1  -1  689.03   33.80
  14  -1  -1  728.73   34.60
 -14  -1   1  713.73   25.10
 -14  -1   1  785.22   34.00
 -14   1   1  708.43   33.50
  14   1  -1  674.23   33.70
  14   1  -1  750.62   33.60
 -14   1   1  764.32   34.70
  14   1  -1  773.02   34.80
  14   1  -1  713.13   34.70
 -14   1   1  748.13   35.20
  14   1  -1  738.63   34.90
 -14   1   1  715.63   32.90
  13  -1  -1   34.20    9.30
  13  -1  -1   33.10    9.50
 -13  -1   1   35.90    9.60
 -13  -1   1   12.50    8.90
  13  -1  -1   20.50   10.80
 -13  -1   1   26.20    4.90
  13  -1  -1   32.30   10.80
 -13  -1   1   30.70    9.50
 -13  -1   1   24.40   10.70
  13  -1  -1   34.90   11.30
  13  -1  -1   15.80    9.50
 -13  -1   1   36.40    9.80
  13   1  -1   21.80    8.90
 -13   1   1   25.00    8.90
  13   1  -1   16.70    9.70
 -13   1   1   31.70   10.90
 -13   1   1   26.40    9.80
 -13   1   1   23.50    9.70
  13   1  -1   31.90    8.80
  13   1  -1   33.20   10.40
  13   1  -1   39.10    8.90
 -13   1   1   19.40    8.90
  13   1  -1   15.40   10.40
  13   1  -1   33.90   10.50
  12  -1  -1    6.80    7.70
 -12  -1   1   12.30    8.30
 -12  -1   1    9.20    7.80
  12  -1  -1   14.40    7.60
  12  -1  -1   23.00    9.70
 -12  -1   1   22.00    8.80
  12  -1  -1   10.20    8.50
 -12  -1   1   17.00    4.20
  12  -1  -1   12.40    7.40
 -12  -1   1   19.00    8.20
  12  -1  -1   13.80    8.30
  12   1  -1    8.80    8.70
  12   1  -1   13.80    8.90
 -12   1   1   18.10    8.80
  12   1  -1   19.90    9.50
  12   1  -1    8.50    8.60
 -12   1   1   28.80    8.60
 -12   1   1    8.50   10.00
  12   1  -1    8.80    8.70
 -12   1   1   13.50    9.10
  12   1  -1    8.80    8.50
 -12   1   1   10.20    7.00
  12   1  -1   -6.10    8.40
  11  -1  -1   27.90    9.10
  11  -1  -1   30.50    9.30
 -11  -1   1   25.80    4.70
 -11  -1   1   28.70    9.10
 -11  -1   1   30.80    9.50
  11  -1  -1   20.00    8.70
  11  -1  -1   23.60    8.90
 -11  -1   1   20.00    6.80
  11  -1  -1   42.30    8.20
 -11  -1   1   35.50    8.60
 -11  -1   1   33.20    8.80
  11  -1  -1   33.50    9.70
  11   1  -1   29.90    9.10
 -11   1   1   59.99   11.00
  11   1  -1   28.10    8.50
  11   1  -1   21.40    9.20
 -11   1   1   28.80    7.90
 -11   1   1   33.00    8.60
 -11   1   1   16.60    7.20
  11   1  -1   18.30    8.60
 -11   1   1    9.60    8.00
  11   1  -1   25.60    7.80
 -11   1   1   28.90    8.80
  11   1  -1   32.40    9.20
  11   1  -1   25.70    9.00
 -10  -1   1  174.98   14.10
  10  -1  -1  156.18   13.50
 -10  -1   1  178.18    9.10
  10  -1  -1  172.38   14.40
 -10  -1   1  182.38   13.90
  10  -1  -1  182.78   14.40
  10  -1  -1  168.38   14.00
 -10  -1   1  203.88   13.90
 -10  -1   1  165.78   12.80
 -10  -1   1  164.78   14.30
  10  -1  -1  198.28   15.20
  10  -1  -1  181.28   12.40
  10   1  -1  166.48   13.70
 -10   1   1  187.28   14.00
 -10   1   1  149.09   12.90
 -10   1   1  177.78   13.80
  10   1  -1  189.08   14.30
 -10   1   1  165.18   13.40
  10   1  -1  176.28   14.10
  10   1  -1  154.18   12.20
  10   1  -1  164.68   13.70
  10   1  -1  181.58   13.00
 -10   1   1  185.28   13.60
  10   1  -1  166.98   13.70
 -10   1   1  165.88   12.40
  -9  -1   1 1240.48   44.50
   9  -1  -1 1241.18   43.00
  -9  -1   1 1223.68   44.30
   9  -1  -1 1191.68   44.40
   9  -1  -1 1306.57   45.10
   9  -1  -1 1231.58   44.80
  -9  -1   1 1235.88   45.10
  -9  -1   1 1228.28   40.00
   9  -1  -1 1218.38   44.60
  -9  -1   1 1184.78   44.50
  -9  -1   1 1254.17   46.50
   9  -1  -1 1280.07   44.80
   9   1  -1 1284.67   44.90
   9   1  -1 1262.67   44.80
   9   1  -1 1239.28   44.80
  -9   1   1 1332.97   45.00
  -9   1   1 1260.27   44.70
   9   1  -1 1239.28   44.70
  -9   1   1 1209.78   44.20
   9   1  -1 1211.58   44.20
  -9   1   1 1150.08   45.20
   9   1  -1 1249.07   44.80
   9   1  -1 1284.17   45.00
   8  -1  -1   34.30    6.50
  -8  -1   1   42.60    7.60
  -8  -1   1   21.30    7.40
   8  -1  -1   51.99    8.30
  -8  -1   1   30.00    7.40
   8  -1  -1   32.10    7.90
  -8  -1   1   21.80    7.50
   8  -1  -1   35.00    8.10
  -8  -1   1   32.50    4.40
   8  -1  -1   34.10    8.00
   8   1  -1   31.40    6.40
  -8   1   1   27.10    7.00
   8   1  -1   27.50    6.30
   8   1  -1   17.10    6.70
   8   1  -1   26.40    7.30
  -8   1   1   31.20    7.60
   8   1  -1   31.80    7.60
   8   1  -1   39.60    8.00
   8   1  -1   33.20    4.30
  -8   1   1   44.10    7.80
  -8   1   1   24.50    7.90
  -8   1   1   34.90    6.10
   7  -1  -1  149.88   11.10
  -7  -1   1  123.19   10.50
  -7  -1   1  137.59    9.70
   7  -1  -1  139.09    9.30
   7  -1  -1  139.79   10.20
  -7  -1   1  153.18   10.70
  -7  -1   1  150.68    7.50
   7  -1  -1  146.69   10.70
   7  -1  -1  144.19   10.50
   7  -1  -1  139.89   10.70
  -7  -1   1  137.99    9.20
  -7   1   1  126.99    9.40
   7   1  -1  124.49    9.20
  -7   1   1  141.29   10.50
   7   1  -1  140.19   10.20
   7   1  -1  150.98   10.50
  -7   1   1  145.09   10.50
   7   1  -1  143.99   10.40
  -7   1   1  138.89   10.10
   7   1  -1  149.88   10.80
  -7   1   1  136.59    8.70
   7   1  -1  139.39    7.30
   7   1  -1  138.49   10.30
  -7   1   1  148.59   10.30
   6  -1  -1  156.28    8.40
   6  -1  -1  162.98    9.80
  -6  -1   1  143.59    8.80
  -6  -1   1  144.19    9.80
   6  -1  -1  158.08    9.90
  -6  -1   1  155.38    7.50
   6  -1  -1  148.79   10.10
   6  -1  -1  158.58   10.30
  -6  -1   1  166.98    9.50
   6  -1  -1  140.79    9.60
  -6  -1   1  148.99    9.90
  -6  -1   1  159.78   10.10
   6   1  -1  159.38   10.00
   6   1  -1  154.48    9.10
  -6   1   1  137.49    9.80
  -6   1   1  152.18   10.50
  -6   1   1  163.58   10.00
   6   1  -1  156.38   10.70
   6   1  -1  153.08   10.00
  -6   1   1  144.99    8.60
   6   1  -1  152.38    9.80
   6   1  -1  154.38   10.00
  -6   1   1  142.99    9.40
  -6   1   1  162.88    9.30
  -5  -1   1  946.71   31.70
   5  -1  -1  896.81   31.70
   5  -1  -1  912.21   30.50
  -5  -1   1  942.41   31.90
  -5  -1   1  937.01   32.20
  -5  -1   1  952.20   32.10
  -5  -1   1  912.01   31.80
   5  -1  -1  940.61   32.60
  -5  -1   1  929.31   30.10
   5  -1  -1  969.70   32.00
   5  -1  -1  951.20   32.00
   5   1  -1  947.51   32.10
  -5   1   1  930.71   31.70
  -5   1   1  921.71   32.30
  -5   1   1  920.61   30.60
  -5   1   1  944.71   31.50
  -5   1   1  942.71   31.90
   5   1  -1  918.31   32.10
   5   1  -1  904.11   30.00
   5   1  -1  932.91   31.90
   5   1  -1  990.60   32.00
   5   1  -1  929.51   31.90
  -4  -1   1 4344.57  134.49
  -4  -1   1 4380.76  134.69
   4  -1  -1 4534.55  135.09
  -4  -1   1 4401.06  134.39
  -4  -1   1 4481.85  134.29
  -4   1   1 4419.26  134.29
   4   1  -1 4422.36  134.59
   4   1  -1 4392.36  134.69
   3  -1  -1 1160.78   35.00
   3  -1  -1 1132.09   36.70
  -3  -1   1 1171.28   36.30
   3  -1  -1 1132.69   35.60
  -3  -1   1 1126.89   36.40
  -3  -1   1 1136.19   37.20
   3  -1  -1 1171.48   36.70
  -3  -1   1 1134.29   36.80
   3  -1  -1 1160.98   36.80
   3  -1  -1 1155.18   37.40
  -3  -1   1 1149.08   36.90
  -3  -1   1 1203.78   36.80
   3   1  -1 1151.38   36.90
   3   1  -1 1174.28   36.90
  -3   1   1 1177.98   35.70
   3   1  -1 1170.18   37.00
  -3   1   1 1162.58   35.00
   3   1  -1 1121.49   36.20
   3   1  -1 1149.19   37.30
  -3   1   1 1146.19   36.80
   3   1  -1 1185.08   36.50
  -3   1   1 1150.98   36.60
  -3   1   1 1179.38   36.70
   2  -1  -1 1782.12   52.99
  -2  -1   1 1776.72   54.09
   2  -1  -1 1698.63   54.29
  -2  -1   1 1761.12   53.79
   2  -1  -1 1701.53   53.69
  -2  -1   1 1778.72   53.99
   2  -1  -1 1724.03   52.49
  -2  -1   1 1779.22   53.89
  -2  -1   1 1760.82   53.19
   2  -1  -1 1718.33   53.69
  -2  -1   1 1782.32   53.79
   2  -1  -1 1758.92   53.89
   2  -1  -1 1800.42   53.79
  -2   1   1 1784.12   52.59
   2   1  -1 1657.93   53.69
  -2   1   1 1848.42   53.89
   2   1  -1 1779.92   53.99
   2   1  -1 1717.23   53.79
  -2   1   1 1771.62   52.99
   2   1  -1 1756.32   54.29
  -2   1   1 1730.93   53.79
   2   1  -1 1715.53   53.99
  -2   1   1 1760.52   53.59
   2   1  -1 1807.82   53.29
   2   1  -1 1703.83   53.69
  -1  -1   1  493.35   15.70
  -1  -1   1  468.55   15.40
   1  -1  -1  487.05   15.60
   1  -1  -1  460.55   15.60
   1  -1  -1  448.46   15.40
   1  -1  -1  483.55   15.60
   1  -1  -1  478.05   15.80
  -1  -1   1  511.65   16.50
   1  -1  -1  472.95   15.70
  -1  -1   1  515.45   16.00
   1  -1  -1  472.75   15.40
   1   1  -1  462.35   15.80
  -1   1   1  475.65   15.40
  -1   1   1  495.95   15.50
  -1   1   1  473.55   15.50
   1   1  -1  479.75   15.70
  -1   1   1  448.76   15.40
   1   1  -1  458.65   15.50
   1   1  -1  463.55   15.60
  -1   1   1  490.85   15.80
   1   1  -1  471.65   15.60
   1   1  -1  471.15   15.80
  -1  -1  -1  132.59    5.80
  -1  -1  -1  136.29    6.30
  -1  -1  -1  132.99    6.20
  -1  -1  -1  131.89    5.90
   1  -1   1  135.09    6.20
   1  -1   1  138.19    5.70
   1  -1   1  128.79    7.50
   1  -1   1  136.49    5.90
   1  -1   1  136.99    5.00
  -1  -1  -1  122.09    5.90
  -1  -1  -1  138.19    6.10
   1  -1   1  138.09    5.60
   1  -1   1  136.89    6.00
   1   1   1  134.29    5.80
  -1   1  -1  142.09    6.00
   1   1   1  137.49    6.30
  -1   1  -1  133.39    5.70
   1   1   1  135.59    5.40
  -1   1  -1  135.79    6.30
  -1   1  -1  133.39    5.70
  -1   1  -1  135.59    5.90
   1   1   1  133.19    6.00
   1   1   1  138.89    6.00
   1   1   1  129.69    6.00
  -2  -1  -1   60.59    5.20
   2  -1   1   53.39    5.00
   2  -1   1   51.99    4.60
  -2  -1  -1   54.89    4.20
   2  -1   1   51.59    4.20
   2  -1   1   48.40    4.10
   2  -1   1   47.30    3.60
  -2  -1  -1   40.70    5.20
   2  -1   1   56.49    5.20
   2  -1   1   54.09    5.00
   2   1   1   63.39    4.60
  -2   1  -1   45.90    3.90
  -2   1  -1   52.99    3.70
  -2   1  -1   59.29    4.80
   2   1   1   54.69    4.80
   2   1   1   51.79    4.40
   2   1   1   48.40    4.30
   2   1   1   47.80    4.70
   2   1   1   50.29    4.70
   2   1   1   59.29    5.10
  -2   1  -1   56.99    5.10
  -3  -1  -1  201.88    9.10
   3  -1   1  223.58    9.80
   3  -1   1  207.48    8.20
  -3  -1  -1  221.88   10.30
  -3  -1  -1  221.88   10.00
  -3  -1  -1  214.68    9.80
  -3  -1  -1  213.78   10.00
   3  -1   1  204.08    9.80
   3  -1   1  214.78    9.90
  -3  -1  -1  212.48   10.20
   3  -1   1  213.68    9.50
   3  -1   1  216.68   10.40
   3  -1   1  202.68    9.70
  -3   1  -1  217.58   10.00
  -3   1  -1  213.58    9.60
   3   1   1  219.98   10.50
   3   1   1  223.98   10.20
  -3   1  -1  214.18   10.20
  -3   1  -1  212.08   10.40
   3   1   1  222.58    9.80
  -3   1  -1  198.98    9.00
  -3   1  -1  226.08    9.90
  -3   1  -1  215.58    8.30
   3   1   1  217.58   10.50
   3   1   1  219.08   10.60
   3   1   1  213.88   10.30
   4  -1   1 3283.57  100.19
  -4  -1  -1 3230.98  101.39
   4  -1   1 3275.27  101.49
  -4  -1  -1 3182.48  101.09
  -4  -1  -1 3255.17   99.69
  -4  -1  -1 3189.68  101.39
  -4  -1  -1 3341.47  101.59
   4  -1   1 3280.77  101.39
  -4  -1  -1 3308.67  101.09
   4  -1   1 3239.68  100.79
   4  -1   1 3202.08  101.29
  -4  -1  -1 3186.38  101.09
   4  -1   1 3345.87  101.39
  -4   1  -1 3298.87  100.29
   4   1   1 3269.77  101.09
   4   1   1 3337.77  101.59
  -4   1  -1 3325.17  101.49
  -4   1  -1 3225.48  101.39
   4   1   1 3239.08  101.39
  -4   1  -1 3285.47  101.39
  -4   1  -1 3417.06  101.69
  -4   1  -1 3340.67  100.79
   4   1   1 3256.07  101.29
   4   1   1 3232.18  100.89
  -4   1  -1 3229.88   98.69
   4   1   1 3286.67  101.59
  -5  -1  -1  827.42   29.10
   5  -1   1  821.12   29.10
  -5  -1  -1  774.22   28.50
  -5  -1  -1  838.42   29.40
  -5  -1  -1  812.52   29.10
   5  -1   1  802.02   28.20
   5  -1   1  792.52   29.00
   5  -1   1  819.32   27.70
  -5  -1  -1  792.72   28.60
  -5  -1  -1  760.72   26.50
  -5  -1  -1  797.92   28.80
   5  -1   1  768.02   29.00
   5   1   1  800.02   27.70
   5   1   1  839.72   29.20
  -5   1  -1  765.52   28.80
  -5   1  -1  788.52   25.60
   5   1   1  804.12   28.70
   5   1   1  790.22   28.60
   5   1   1  787.52   29.00
  -5   1  -1  772.42   28.70
  -5   1  -1  802.42   28.80
  -5   1  -1  805.72   28.90
   5   1   1  777.92   28.70
  -5   1  -1  791.72   27.60
   5   1   1  779.72   28.40
  -5   1  -1  798.62   28.10
   6  -1   1  435.16   17.80
  -6  -1  -1  416.36   20.60
   6  -1   1  412.96   18.00
   6  -1   1  396.96   18.80
   6  -1   1  459.85   19.20
  -6  -1  -1  407.16   19.10
   6  -1   1  411.66   18.30
  -6  -1  -1  419.86   19.00
  -6  -1  -1  428.26   16.10
   6   1   1  437.56   19.10
   6   1   1  436.26   19.30
  -6   1  -1  440.16   19.60
  -6   1  -1  421.46   17.90
  -6   1  -1  425.26   14.90
   6   1   1  419.36   19.00
  -6   1  -1  464.45   19.00
   6   1   1  426.16   18.90
  -6   1  -1  431.96   19.10
   6   1   1  432.86   17.80
   6   1   1  432.56   18.70
   7  -1   1  239.38   14.60
  -7  -1  -1  206.18   13.00
   7  -1   1  213.28   13.00
   7  -1   1  211.08   12.80
  -7  -1  -1  216.18   10.60
  -7  -1  -1  238.38   14.50
  -7  -1  -1  235.38   14.50
   7  -1   1  235.98   12.70
  -7  -1  -1  202.78   13.80
   7  -1   1  215.28   14.10
   7   1   1  219.18   13.00
   7   1   1  238.48   13.30
   7   1   1  217.08   12.90
  -7   1  -1  229.18   12.40
  -7   1  -1  219.78    9.10
  -7   1  -1  220.78   12.70
  -7   1  -1  222.08   13.90
  -7   1  -1  216.48   14.60
   7   1   1  204.08   12.90
   7   1   1  223.88   13.80
  -7   1  -1  215.08   14.10
   7   1   1  248.58   14.70
  -8  -1  -1  118.19   11.30
  -8  -1  -1   85.59    7.40
   8  -1   1  101.69   10.80
   8  -1   1  109.59   10.70
  -8  -1  -1  124.79   12.50
   8  -1   1  109.49   10.20
  -8  -1  -1  107.99   11.60
  -8  -1  -1   76.99   10.20
  -8  -1  -1   89.89   10.20
   8  -1   1   93.39   11.50
   8  -1   1  105.79   11.70
  -8   1  -1  108.19   12.00
   8   1   1   97.59   11.00
  -8   1  -1   99.89   11.30
  -8   1  -1   86.69    6.50
   8   1   1  102.89   11.30
  -8   1  -1   80.49   10.90
   8   1   1   75.99    9.50
  -8   1  -1  119.19   11.70
   8   1   1  108.59   11.80
   8   1   1  104.89   11.00
   8   1   1  125.29   11.60
   8   1   1  100.49   10.80
  -8   1  -1   79.79    9.60
   9  -1   1  781.22   33.10
  -9  -1  -1  793.92   33.20
  -9  -1  -1  812.22   32.00
   9  -1   1  837.12   33.30
   9  -1   1  846.02   31.50
  -9  -1  -1  800.52   28.10
  -9  -1  -1  820.82   32.30
  -9  -1  -1  828.72   33.20
   9  -1   1  873.01   32.50
   9  -1   1  791.52   33.10
  -9  -1  -1  790.62   33.20
  -9   1  -1  834.72   32.60
   9   1   1  802.22   32.30
   9   1   1  776.02   31.50
  -9   1  -1  820.92   33.10
   9   1   1  826.22   33.20
   9   1   1  811.02   32.30
  -9   1  -1  770.52   32.50
   9   1   1  787.12   32.00
  -9   1  -1  782.42   26.40
   9   1   1  813.22   33.20
  -9   1  -1  826.62   31.40
  -9   1  -1  825.52   31.90
  -9   1  -1  793.02   32.50
   9   1   1  764.02   32.20
  10  -1   1   -2.50    7.20
  10  -1   1   -1.70    8.10
  10  -1   1    6.40    6.60
  10  -1   1    6.00    7.70
 -10  -1  -1    2.90    5.90
 -10  -1  -1    0.80    8.30
 -10  -1  -1   -2.10    4.00
 -10  -1  -1   -7.00    4.50
  10  -1   1   -1.80    6.50
 -10  -1  -1   -0.40    6.20
  10  -1   1   -5.70    6.40
 -10  -1  -1    9.70    7.20
 -10   1  -1   -3.40    6.20
 -10   1  -1   -3.20    5.30
 -10   1  -1   -0.90    5.80
 -10   1  -1    6.00    7.10
  10   1   1   -2.20    6.60
 -10   1  -1   -2.90    6.20
 -10   1  -1   -1.40    2.70
  10   1   1   -6.40    4.80
  10   1   1    4.20    6.20
  10   1   1    3.10    8.70
  10   1   1    5.60    7.80
  10   1   1   -1.60    7.60
  10   1   1   -9.10    7.80
 -10   1  -1   11.10    8.50
  11  -1   1  143.99   13.30
 -11  -1  -1  120.99    9.10
  11  -1   1  131.69   14.60
 -11  -1  -1  137.59   13.30
 -11  -1  -1  112.59   13.80
  11  -1   1  141.89   14.00
 -11  -1  -1  161.28   25.60
 -11  -1  -1  125.19   14.80
  11  -1   1  114.89   14.40
  11  -1   1  148.19   13.80
 -11  -1  -1  139.19   14.30
  11  -1   1  127.49   14.50
  11   1   1  127.49   14.00
  11   1   1  157.98   14.80
  11   1   1  134.79   14.10
 -11   1  -1  139.19   15.40
 -11   1  -1  147.19   13.90
 -11   1  -1  140.79   14.30
 -11   1  -1  127.69   12.90
 -11   1  -1  133.99   14.70
  11   1   1  129.39   13.40
 -11   1  -1  124.19    6.90
  11   1   1  136.39   15.10
 -11   1  -1  123.59   15.20
  12  -1   1  327.67   19.60
  12  -1   1  340.67   21.60
  12  -1   1  319.97   22.10
  12  -1   1  296.17   20.00
 -12  -1  -1  362.86   23.10
 -12  -1  -1  321.57   20.30
  12  -1   1  340.37   20.10
  12  -1   1  398.56   22.50
 -12  -1  -1  335.37   20.00
 -12  -1  -1  345.27   20.70
 -12  -1  -1  340.17   22.10
  12   1   1  354.46   20.50
  12   1   1  363.26   21.60
 -12   1  -1  333.77   22.20
  12   1   1  351.56   20.60
 -12   1  -1  310.07   12.70
  12   1   1  356.66   22.20
  12   1   1  322.37   20.00
 -12   1  -1  335.97   19.30
 -12   1  -1  332.57   22.80
  12   1   1  362.16   22.50
 -12   1  -1  329.47   20.30
 -12   1  -1  368.56   20.60
  12   1   1  354.46   22.80
 -13  -1  -1   66.09   13.80
  13  -1   1   65.09   11.70
  13  -1   1   60.39   13.60
 -13  -1  -1   73.09   14.70
 -13  -1  -1   60.19   11.20
  13  -1   1   62.09   12.60
 -13  -1  -1   60.99   13.00
  13  -1   1   77.19   13.20
  13  -1   1  103.49   14.30
 -13  -1  -1   56.89   11.70
  13   1   1   88.99   14.90
  13   1   1   96.89   14.10
  13   1   1   80.29   13.50
 -13   1  -1   64.99    5.20
 -13   1  -1   72.39    7.40
 -13   1  -1   77.69   14.20
 -13   1  -1   60.99   11.40
 -13   1  -1   82.49   15.80
 -13   1  -1   94.39   14.30
 -13   1  -1   97.79   13.50
  13   1   1   48.80   12.90
  14  -1   1    3.60   11.80
  14  -1   1   21.30   10.10
  14  -1   1    3.60    9.50
  14  -1   1   10.80    9.60
 -14  -1  -1   -7.60    9.50
 -14  -1  -1   12.80   12.50
  14  -1   1   13.30   10.50
 -14  -1  -1   -2.90    8.60
  14   1   1    0.50    8.70
 -14   1  -1   -0.40    9.80
 -14   1  -1    2.20    8.30
 -14   1  -1   -2.20    2.50
 -14   1  -1    7.00   12.10
 -14   1  -1   -6.50   11.80
 -14   1  -1    6.80   10.10
  14   1   1   15.40   11.40
 -14   1  -1   -1.90    2.40
  14   1   1   -1.10    9.60
  14   1   1   -3.20    9.30
  14   1   1    1.30   11.00
 -15  -1  -1    5.20   13.10
  15  -1   1    0.40   10.70
  15  -1   1    7.30   13.10
  15  -1   1    4.30   10.70
  15  -1   1   -6.10   12.20
 -15  -1  -1    1.80   12.60
  15  -1   1    0.50   10.10
 -15   1  -1    8.20   13.00
  15   1   1    6.60   10.10
  15   1   1   -1.30   10.80
  15   1   1    1.20   11.20
  15   1   1  -12.20   12.60
 -15   1  -1   16.30   14.20
  15   1   1  -13.00   10.20
  16  -1   1 1185.08   51.29
  16  -1   1 1092.69   46.80
 -16  -1  -1 1169.18   50.59
  16  -1   1 1096.19   50.39
 -16  -1  -1 1184.38   51.89
  16  -1   1 1140.29   49.00
  16   1   1 1091.29   50.59
  16   1   1 1196.88   49.30
 -16   1  -1 1117.49   50.19
  16   1   1 1213.18   51.59
 -16   1  -1 1172.58   52.29
  16   1   1 1066.79   47.80
 -17  -1  -1   23.10   16.10
  17  -1   1   22.50   14.70
 -17  -1  -1   57.09   18.00
 -17  -1  -1   33.40    5.60
  17  -1   1   21.80   15.40
  17  -1   1   21.90   13.80
 -17  -1  -1   27.60    5.70
  17  -1   1   27.00   13.60
  17   1   1   34.90   14.60
 -17   1  -1   45.80   16.70
  17   1   1   28.90   16.20
 -17   1  -1   14.30   15.50
  17   1   1    9.70   12.60
  17   1   1   20.70   15.00
  18  -1   1  454.55   30.10
  18  -1   1  523.35   33.90
 -18  -1  -1  392.36   16.00
 -18  -1  -1  411.96   32.20
 -18  -1  -1  411.96   15.70
  18  -1   1  386.46   31.30
 -18  -1  -1  433.66   32.20
  18  -1   1  351.86   28.70
  18   1   1  409.76   31.60
  18   1   1  344.57   27.30
 -18   1  -1  445.16   32.20
  18   1   1  430.56   29.20
  18   1   1  348.27   28.60
  19  -1   1   48.00   16.30
  19  -1   1   36.90   14.60
  19  -1   1   52.09   18.70
 -19  -1  -1   31.30   15.30
  19  -1   1   53.19   17.10
 -19  -1  -1   59.49   18.90
  19   1   1   61.29   18.80
  19   1   1   36.80   18.50
 -19   1  -1   85.79   20.20
  19   1   1   50.39   16.70
  19   1   1   67.89   17.80
 -20  -1  -1   62.59   19.50
  20  -1   1   64.19   17.50
 -20  -1  -1   43.60   18.30
  20  -1   1   62.89   20.90
  20  -1   1   77.59   18.40
  20  -1   1   50.79   17.50
  20   1   1   53.89   17.80
  20   1   1   44.90   17.60
 -20   1  -1   45.90   19.70
  20   1   1   48.50   20.20
  20   1   1   54.09   18.40
  21  -1   1    6.70   18.80
  21  -1   1   13.40   18.40
  21  -1   1   -8.70   15.40
  21  -1   1  -10.30   15.30
 -21  -1  -1   13.10   17.20
  21   1   1   31.10   18.40
  21   1   1   17.70   16.50
  21   1   1   -7.40   17.70
  21   1   1   39.80   19.60
 -21   1  -1    5.40   17.40
  22  -1   1   24.20   19.10
  22  -1   1    5.20   17.20
  22  -1   1   29.40   18.40
  22  -1   1   37.00   21.80
  22   1   1    9.80   17.30
  22   1   1   29.60   17.20
  22   1   1   14.70   19.60
  22   1   1   37.80   17.90
  23  -1   1   64.49   20.30
  23  -1   1  118.09   23.40
  23  -1   1   95.39   23.90
  23  -1   1   66.09   22.90
 -23   1  -1   68.19   23.10
  23   1   1   82.79   24.00
  23   1   1  129.29   26.90
  23   1   1  110.09   23.50
  23   1   1   74.99   22.50
  24  -1   1   -8.50   19.60
 -24  -1  -1  -23.20   20.40
  24  -1   1    8.00   20.80
  24  -1   1    8.70   19.30
  24  -1   1  -24.90   17.20
  24   1   1   28.40   20.70
  24   1   1  -10.20   21.10
  24   1   1   -0.70   20.20
  24   1   1  -14.00   20.90
 -24   1  -1  -19.60   19.60
  24  -2  -1  155.38   22.50
 -24  -2   1  159.38   26.70
  24  -2  -1  181.18   27.90
  24  -2  -1  130.49   26.20
  24  -2  -1  176.88   30.30
  24   2  -1  139.19   25.00
  24   2  -1   87.79   23.60
  24   2  -1  162.68   28.30
  24   2  -1   93.89   25.00
 -24   2   1  108.19   24.50
  23  -2  -1  294.37   27.70
  23  -2  -1  398.56   35.90
  23  -2  -1  298.27   33.70
  23  -2  -1  334.17   33.60
 -23  -2   1  345.67   34.90
  23   2  -1  354.86   34.40
  23   2  -1  315.37   33.90
 -23   2   1  388.56   36.20
  23   2  -1  327.87   31.70
  23   2  -1  306.87   32.60
  22  -2  -1   70.09   21.40
  22  -2  -1   79.49   22.00
  22  -2  -1   31.20   16.80
 -22  -2   1   55.69   19.70
  22  -2  -1   43.30   16.30
  22   2  -1   26.80   17.90
  22   2  -1   19.60   19.20
  22   2  -1   47.60   20.80
  22   2  -1   50.39   19.10
 -22   2   1   54.59   20.30
 -21  -2   1   29.80   18.70
  21  -2  -1   34.00   19.30
  21  -2  -1   50.19   18.10
  21  -2  -1   50.49   19.60
  21  -2  -1   41.40   16.10
  21   2  -1   46.90   17.30
 -21   2   1   24.90   16.90
  21   2  -1   50.99   18.90
  21   2  -1   30.00   18.00
  21   2  -1   21.70   17.40
  20  -2  -1   53.29   21.60
  20  -2  -1   64.49   22.40
  20  -2  -1   64.39   16.90
  20  -2  -1   42.40   18.80
 -20  -2   1   64.89   19.30
  20   2  -1   65.79   18.20
  20   2  -1   23.30   17.40
 -20   2   1   47.80   17.90
  20   2  -1   52.39   19.00
 -19  -2   1   23.80   17.00
  19  -2  -1   94.89   20.00
 -19  -2   1   57.29   17.50
  19  -2  -1   65.29   18.80
  19  -2  -1   65.79   15.50
 -19  -2   1   62.19    5.90
  19  -2  -1   56.89   17.40
  19   2  -1   65.59   18.30
 -19   2   1   74.29   18.70
  19   2  -1   89.39   19.80
  19   2  -1   48.20   17.20
  19   2  -1   61.69   17.50
  18  -2  -1   11.20   14.00
 -18  -2   1   23.10   15.90
 -18  -2   1   -0.80   14.50
 -18  -2   1   -1.70    5.50
  18  -2  -1  -11.00   13.40
  18  -2  -1    7.40   11.90
  18  -2  -1   -3.20   14.10
  18   2  -1   22.60   14.00
  18   2  -1   -3.70   13.60
  18   2  -1  -10.90   13.70
 -18   2   1   -9.10   13.30
  18   2  -1   26.30   15.20
  17  -2  -1   49.90   15.10
 -17  -2   1   61.99   16.10
  17  -2  -1   59.19   13.50
  17  -2  -1   53.89   13.40
  17  -2  -1   38.00   15.50
  17  -2  -1   40.90   15.40
 -17  -2   1   55.59   16.30
  17   2  -1   75.59   15.50
  17   2  -1   39.60   15.00
  17   2  -1   34.40   13.70
 -17   2   1   71.99   16.70
  17   2  -1   80.89   17.60
  17   2  -1   86.49   17.10
 -16  -2   1  154.08   11.40
  16  -2  -1  178.48   17.70
  16  -2  -1  149.88   17.80
  16  -2  -1  145.99   19.60
  16  -2  -1  151.78   18.50
  16  -2  -1  146.99   19.70
 -16  -2   1  133.09   18.90
 -16  -2   1  160.98   20.00
  16   2  -1  163.28   18.80
 -16   2   1  138.89   18.80
 -16   2   1  145.09   16.00
  16   2  -1  127.89   19.00
  16   2  -1  141.39   19.10
  16   2  -1  154.68   18.90
  16   2  -1  147.49   18.70
  15  -2  -1   19.70   10.30
  15  -2  -1   46.00   14.40
  15  -2  -1   28.70   11.70
 -15  -2   1   40.30   12.70
 -15  -2   1   35.80   12.90
  15  -2  -1   39.50   13.70
  15  -2  -1   31.70   11.70
 -15  -2   1   40.60    7.00
 -15  -2   1   38.00   11.00
 -15   2   1   23.50   10.00
  15   2  -1   30.50   13.70
  15   2  -1   33.50   13.10
 -15   2   1   50.89   13.70
  15   2  -1   30.60   12.40
 -15   2   1   19.00   10.70
  15   2  -1   54.69   13.30
  15   2  -1   19.30   11.00
  14  -2  -1  353.86   23.10
  14  -2  -1  393.66   25.30
 -14  -2   1  382.86   17.10
  14  -2  -1  411.16   22.40
 -14  -2   1  452.35   24.30
 -14  -2   1  354.86   22.30
 -14  -2   1  385.76   24.00
  14  -2  -1  441.46   25.90
 -14  -2   1  409.06   25.20
  14  -2  -1  372.46   25.10
  14   2  -1  385.26   25.20
  14   2  -1  397.96   24.40
 -14   2   1  360.36   24.00
  14   2  -1  387.56   24.60
 -14   2   1  407.06   22.90
 -14   2   1  372.86   21.50
  14   2  -1  413.26   24.40
  14   2  -1  395.16   25.00
 -14   2   1  402.46   23.70
  13  -2  -1  153.98   16.90
  13  -2  -1  144.29   16.10
 -13  -2   1  154.68   16.20
  13  -2  -1  134.49   16.20
 -13  -2   1  163.58   15.60
 -13  -2   1  130.79   10.20
 -13  -2   1  135.49   16.50
  13  -2  -1  154.08   13.80
 -13  -2   1  153.28   15.60
 -13  -2   1  115.49   15.60
  13  -2  -1  162.38   16.10
  13   2  -1  154.28   16.50
 -13   2   1  165.08   15.40
  13   2  -1  148.49   15.90
  13   2  -1  161.18   17.20
  13   2  -1  131.99   14.50
  13   2  -1  146.29   16.20
 -13   2   1  151.18   15.30
 -13   2   1  134.89   16.00
 -13   2   1  133.99   15.20
  13   2  -1  131.09   16.20
 -13   2   1  148.99   13.40
 -12  -2   1   70.09    7.70
 -12  -2   1   71.69   10.80
 -12  -2   1   63.09   11.50
  12  -2  -1   58.69   10.30
  12  -2  -1   49.99   11.00
 -12  -2   1   62.29   12.00
  12  -2  -1   55.39    9.10
 -12  -2   1   61.79   12.10
 -12  -2   1   57.09   10.20
 -12   2   1   54.59   10.40
  12   2  -1   54.19   11.10
  12   2  -1   51.99   12.60
 -12   2   1   64.19    9.50
  12   2  -1   65.79   11.30
  12   2  -1   73.59   11.90
  12   2  -1   65.19   11.40
  12   2  -1   58.79   10.30
 -12   2   1   73.09   12.10
 -12   2   1   44.90   11.50
 -11  -2   1 1160.88   44.10
 -11  -2   1 1233.88   44.90
 -11  -2   1 1124.99   44.70
 -11  -2   1 1133.69   45.00
  11  -2  -1 1189.68   42.20
  11  -2  -1 1182.98   45.10
  11  -2  -1 1189.38   44.70
  11  -2  -1 1244.08   46.00
 -11  -2   1 1163.58   45.10
  11  -2  -1 1178.38   45.40
  11  -2  -1 1179.48   45.20
  11   2  -1 1167.68   47.70
 -11   2   1 1240.88   42.60
  11   2  -1 1200.08   44.80
  11   2  -1 1210.28   44.90
  11   2  -1 1166.58   39.70
 -11   2   1 1149.19   44.90
  11   2  -1 1203.88   45.20
 -11   2   1 1144.29   43.60
 -11   2   1 1213.48   45.30
 -11   2   1 1189.08   44.70
  11   2  -1 1180.48   44.90
  11   2  -1 1157.48   45.10
  11   2  -1 1181.28   45.40
 -10  -2   1  408.86   21.30
  10  -2  -1  422.36   22.60
 -10  -2   1  468.15   18.30
 -10  -2   1  442.46   22.50
 -10  -2   1  416.86   21.80
  10  -2  -1  418.46   21.90
  10  -2  -1  461.35   22.20
 -10  -2   1  428.66   21.90
  10  -2  -1  476.15   22.80
 -10  -2   1  426.46   22.00
  10  -2  -1  427.56   19.60
  10   2  -1  412.46   21.40
 -10   2   1  464.65   21.30
 -10   2   1  418.96   20.70
  10   2  -1  461.45   18.10
  10   2  -1  415.56   22.10
  10   2  -1  432.96   22.20
  10   2  -1  459.25   22.40
  10   2  -1  469.35   22.80
  10   2  -1  469.05   22.40
  10   2  -1  451.85   22.20
 -10   2   1  428.36   21.80
 -10   2   1  423.06   21.90
  -9  -2   1 1447.26   50.69
  -9  -2   1 1424.36   50.19
  -9  -2   1 1421.96   46.70
   9  -2  -1 1501.55   50.59
   9  -2  -1 1388.46   50.49
  -9  -2   1 1390.36   50.39
  -9  -2   1 1398.06   49.70
   9  -2  -1 1420.76   49.99
   9  -2  -1 1417.96   50.89
  -9  -2   1 1429.86   50.19
   9  -2  -1 1405.76   47.60
   9   2  -1 1456.75   50.39
   9   2  -1 1447.56   50.09
  -9   2   1 1424.26   50.59
   9   2  -1 1335.57   49.80
  -9   2   1 1469.35   50.29
   9   2  -1 1439.06   50.59
  -9   2   1 1437.96   50.49
  -9   2   1 1462.55   47.80
   9   2  -1 1435.36   50.79
   9   2  -1 1364.76   50.19
  -9   2   1 1455.75   49.60
   9   2  -1 1371.56   46.50
  -8  -2   1  127.09   11.60
   8  -2  -1  144.99   13.30
   8  -2  -1  137.89   11.30
  -8  -2   1  136.19   12.00
   8  -2  -1  148.59   12.20
  -8  -2   1  145.79   10.50
   8  -2  -1  112.89   10.00
  -8  -2   1  145.19    9.10
   8  -2  -1  139.29    9.50
  -8  -2   1  124.99   11.90
   8   2  -1  137.19   12.30
   8   2  -1  144.79   12.20
   8   2  -1  139.39   11.20
   8   2  -1  125.79   12.10
   8   2  -1  133.09   12.00
   8   2  -1  131.69   12.30
  -8   2   1  149.09   10.90
  -8   2   1  123.89   11.20
   8   2  -1  139.09    8.90
  -8   2   1  144.19   12.00
   7  -2  -1  753.12   28.20
   7  -2  -1  750.32   28.40
  -7  -2   1  756.72   26.10
  -7  -2   1  735.23   28.60
   7  -2  -1  758.82   25.90
  -7  -2   1  758.42   30.10
   7  -2  -1  734.53   28.50
  -7  -2   1  734.63   28.30
   7  -2  -1  679.93   28.70
  -7  -2   1  745.03   27.90
  -7   2   1  725.93   25.80
  -7   2   1  737.03   28.70
   7   2  -1  717.83   25.80
   7   2  -1  699.83   27.80
  -7   2   1  736.53   22.80
   7   2  -1  775.62   29.00
  -7   2   1  724.53   28.10
  -7   2   1  738.53   27.70
  -7   2   1  777.42   28.30
   7   2  -1  723.83   28.60
   7   2  -1  727.83   27.70
   7   2  -1  722.13   28.30
  -6  -2   1 2242.38   71.09
  -6  -2   1 2217.18   71.69
   6  -2  -1 2296.17   71.79
   6  -2  -1 2269.87   72.59
   6  -2  -1 2224.38   67.49
   6  -2  -1 2288.07   69.29
   6  -2  -1 2216.88   71.69
  -6  -2   1 2182.88   69.99
  -6  -2   1 2276.67   72.09
  -6  -2   1 2190.28   71.79
   6  -2  -1 2173.18   71.69
   6   2  -1 2175.68   71.59
  -6   2   1 2306.07   72.49
   6   2  -1 2239.28   72.09
  -6   2   1 2247.38   73.09
  -6   2   1 2248.68   69.29
   6   2  -1 2181.08   69.89
   6   2  -1 2224.58   71.89
  -6   2   1 2236.78   71.49
  -6   2   1 2256.17   71.79
  -6   2   1 2227.08   67.49
   6   2  -1 2242.08   72.19
  -5  -2   1  289.27   13.30
  -5  -2   1  290.67   14.20
   5  -2  -1  275.97   13.80
   5  -2  -1  291.97   13.50
   5  -2  -1  326.37   14.10
   5  -2  -1  302.17   13.20
   5  -2  -1  274.07   10.30
   5  -2  -1  304.07   11.90
  -5  -2   1  305.57   13.30
  -5  -2   1  319.37   13.10
  -5  -2   1  297.87   13.90
  -5  -2   1  294.77   12.60
   5  -2  -1  294.57   14.40
  -5  -2   1  281.17   13.30
  -5   2   1  286.17   10.40
  -5   2   1  290.87   13.10
  -5   2   1  283.97   14.50
   5   2  -1  294.07   13.00
   5   2  -1  288.27   13.30
  -5   2   1  287.07   13.60
  -5   2   1  296.87   14.20
   5   2  -1  259.27   13.70
   5   2  -1  316.27   12.80
  -5   2   1  296.27   11.20
   5   2  -1  303.27   13.50
   5   2  -1  284.97   13.70
   4  -2  -1  147.89    8.60
  -4  -2   1  143.19    8.40
  -4  -2   1  130.79    7.70
   4  -2  -1  154.48    9.70
   4  -2  -1  148.49    8.80
   4  -2  -1  155.48    8.80
  -4  -2   1  152.28    8.10
   4  -2  -1  148.89    6.20
  -4  -2   1  133.59    9.10
   4  -2  -1  146.69    6.50
  -4  -2   1  146.09    8.80
  -4  -2   1  146.29    9.10
   4  -2  -1  153.08    8.60
   4   2  -1  145.89    9.00
   4   2  -1  157.98    9.20
  -4   2   1  122.19    8.60
  -4   2   1  148.09    6.50
  -4   2   1  137.59    8.20
  -4   2   1  142.59   10.20
   4   2  -1  127.49    7.80
  -4   2   1  147.19    6.20
   4   2  -1  137.59    8.40
   4   2  -1  155.68    9.10
   4   2  -1  149.29    8.00
  -4   2   1  139.39    8.40
   4   2  -1  146.49    8.90
   3  -2  -1 2648.73   80.99
   3  -2  -1 2646.64   79.59
  -3  -2   1 2580.74   80.99
  -3  -2   1 2682.13   81.19
  -3  -2   1 2643.74   81.19
  -3  -2   1 2603.54   80.79
   3  -2  -1 2675.13   80.79
  -3  -2   1 2551.14   79.69
   3  -2  -1 2589.84   80.99
   3  -2  -1 2574.84   81.49
   3  -2  -1 2602.04   80.89
   3   2  -1 2626.24   81.19
   3   2  -1 2567.34   80.79
  -3   2   1 2610.34   78.39
   3   2  -1 2677.73   79.79
   3   2  -1 2711.73   81.59
  -3   2   1 2587.34   79.59
  -3   2   1 2611.44   80.69
  -3   2   1 2608.14   81.19
  -3   2   1 2599.44   80.79
  -3   2   1 2570.44   80.79
   3   2  -1 2682.03   81.39
   3   2  -1 2550.74   80.99
   3   2  -1 2631.24   81.09
   2  -2  -1  669.93   23.00
  -2  -2   1  684.83   23.00
   2  -2  -1  699.03   22.30
   2  -2  -1  678.63   23.00
  -2  -2   1  686.53   23.40
   2  -2  -1  681.33   23.30
  -2  -2   1  657.63   23.10
   2  -2  -1  660.73   23.00
  -2  -2   1  664.63   23.10
  -2  -2   1  671.63   23.00
  -2  -2   1  683.23   21.40
   2  -2  -1  676.63   22.80
  -2  -2   1  679.43   23.10
   2   2  -1  679.63   23.20
  -2   2   1  676.93   22.90
  -2   2   1  658.83   22.80
   2   2  -1  672.03   21.30
  -2   2   1  666.63   22.50
   2   2  -1  682.73   22.70
   2   2  -1  672.53   23.20
  -2   2   1  660.23   22.80
   2   2  -1  659.13   22.90
  -2   2   1  682.73   22.30
   2   2  -1  668.23   23.20
   2   2  -1  663.13   23.20
   2   2  -1  659.93   23.10
   1  -2  -1  174.98    8.20
   1  -2  -1  177.38    6.30
   1  -2  -1  169.58    7.50
   1  -2  -1  179.78    8.20
  -1  -2   1  169.58    8.20
  -1  -2   1  175.08    6.10
  -1  -2   1  175.68    8.70
  -1  -2   1  182.68    7.90
   1  -2  -1  160.58    7.90
  -1  -2   1  173.08    8.00
   1  -2  -1  155.68    8.00
  -1  -2   1  157.78    8.50
   1  -2  -1  172.48    8.00
  -1   2   1  166.48    6.30
  -1   2   1  188.58    8.40
   1   2  -1  176.18    8.00
  -1   2   1  170.48    7.90
  -1   2   1  175.38    8.40
   1   2  -1  173.48    7.60
   1   2  -1  176.98    8.50
  -1   2   1  177.18    8.20
  -1   2   1  147.29    8.60
  -1   2   1  182.08    8.20
   1   2  -1  182.18    8.40
   1   2  -1  173.78    6.10
   1   2  -1  165.58    8.40
   0  -2  -1  107.39    6.90
   0  -2   1  105.29    5.40
   0  -2   1  111.39    5.70
   0  -2  -1  107.89    6.80
   0  -2  -1  106.69    6.80
   0  -2   1  112.29    6.10
   0  -2   1  104.39    6.80
   0  -2  -1  103.39    6.50
   0  -2  -1  109.09    5.40
   0  -2   1  102.69    5.90
   0  -2   1  102.39    5.80
   0  -2  -1  112.99    6.50
   0  -2  -1  109.99    6.00
   0   2   1  115.39    6.50
   0   2   1   98.19    6.50
   0   2   1  118.99    6.40
   0   2  -1  111.89    5.50
   0   2  -1  103.39    5.70
   0   2  -1  109.59    6.60
   0   2   1  112.29    5.50
   0   2  -1  110.19    6.50
   0   2   1   96.29    5.60
   0   2   1  100.69    5.80
   0   2  -1  104.79    6.50
   1  -2   1   42.30    4.40
   1  -2   1   40.00    4.90
   1  -2   1   43.30    4.50
  -1  -2  -1   43.50    4.80
  -1  -2  -1   43.70    5.20
  -1  -2  -1   39.50    4.20
   1  -2   1   44.80    3.60
  -1  -2  -1   42.10    5.00
  -1  -2  -1   44.90    5.10
   1  -2   1   38.90    4.40
   1  -2   1   49.40    5.40
   1  -2   1   40.80    3.80
  -1  -2  -1   39.10    4.10
  -1   2  -1   26.50    4.60
  -1   2  -1   48.60    5.10
   1   2   1   45.00    5.10
   1   2   1   34.30    4.90
  -1   2  -1   51.69    5.30
  -1   2  -1   48.60    3.80
   1   2   1   38.70    4.40
   1   2   1   50.39    4.70
   1   2   1   48.00    4.70
   1   2   1   44.70    4.20
  -1   2  -1   45.00    4.90
   2  -2   1  176.18    9.40
  -2  -2  -1  166.28    9.40
   2  -2   1  164.78    9.10
  -2  -2  -1  169.48    8.50
   2  -2   1  167.38    7.80
   2  -2   1  182.28    8.70
  -2  -2  -1  151.78    8.00
  -2  -2  -1  176.18    9.40
   2  -2   1  175.88    7.40
  -2  -2  -1  171.08    8.60
  -2  -2  -1  155.08    8.50
   2  -2   1  153.28    8.00
   2  -2   1  179.18    9.40
  -2   2  -1  169.98    9.00
   2   2   1  167.68    8.70
  -2   2  -1  163.28    7.50
   2   2   1  173.18    9.20
   2   2   1  154.08    9.30
   2   2   1  168.28    8.70
  -2   2  -1  179.18    9.10
   2   2   1  171.68    8.30
   2   2   1  168.98    8.20
   2   2   1  166.48    8.20
  -2   2  -1  183.38    8.80
   3  -2   1 1492.25   48.40
   3  -2   1 1530.95   47.20
   3  -2   1 1516.85   49.00
  -3  -2  -1 1537.75   49.10
   3  -2   1 1532.95   48.80
   3  -2   1 1461.25   48.80
  -3  -2  -1 1496.95   48.90
  -3  -2  -1 1496.35   49.30
  -3  -2  -1 1497.05   48.80
  -3  -2  -1 1535.75   48.40
  -3  -2  -1 1530.95   48.20
   3  -2   1 1463.25   48.80
  -3  -2  -1 1502.45   49.10
   3  -2   1 1494.05   47.30
  -3   2  -1 1531.05   48.60
   3   2   1 1594.04   49.60
  -3   2  -1 1458.65   48.50
  -3   2  -1 1560.24   49.00
   3   2   1 1495.25   48.70
   3   2   1 1504.25   48.20
  -3   2  -1 1526.55   47.10
   3   2   1 1424.46   49.90
  -3   2  -1 1506.35   49.00
   3   2   1 1487.05   49.00
   3   2   1 1506.85   48.30
  -3   2  -1 1459.25   48.80
   3   2   1 1510.95   49.30
  -4  -2  -1 3379.26  102.79
  -4  -2  -1 3414.16  104.49
   4  -2   1 3328.07  104.19
  -4  -2  -1 3205.08  103.69
   4  -2   1 3516.35  106.19
   4  -2   1 3299.17  101.39
  -4  -2  -1 3332.07  103.49
  -4  -2  -1 3285.07  104.09
   4  -2   1 3425.36  103.99
   4  -2   1 3314.97  103.69
   4  -2   1 3343.37  103.99
   4   2   1 3364.96  102.89
  -4   2  -1 3273.37  103.69
   4   2   1 3353.66  104.29
   4   2   1 3339.57  105.09
  -4   2  -1 3349.06  103.59
   4   2   1 3324.47  103.79
  -4   2  -1 3369.86  104.19
   4   2   1 3320.57  104.09
   4   2   1 3271.77  103.39
  -4   2  -1 3332.57  103.79
   4   2   1 3332.17  104.09
  -4   2  -1 3372.06  101.99
  -5  -2  -1  390.96   17.50
   5  -2   1  352.36   16.80
  -5  -2  -1  396.06   15.60
   5  -2   1  372.46   13.90
   5  -2   1  413.56   17.80
   5  -2   1  397.86   17.00
  -5  -2  -1  402.46   17.30
   5  -2   1  379.56   17.00
  -5  -2  -1  382.66   17.20
   5  -2   1  372.66   15.30
  -5  -2  -1  385.66   16.90
  -5  -2  -1  378.96   17.60
   5   2   1  387.36   17.30
   5   2   1  409.06   17.10
  -5   2  -1  385.76   16.70
  -5   2  -1  392.56   17.60
   5   2   1  393.96   17.00
   5   2   1  389.26   18.90
   5   2   1  392.86   17.60
  -5   2  -1  401.26   17.20
   5   2   1  385.46   15.50
   5   2   1  369.46   19.20
  -5   2  -1  365.26   15.00
  -5   2  -1  370.26   17.20
  -5   2  -1  372.86   16.60
   6  -2   1  179.58   11.40
  -6  -2  -1  177.18   12.20
  -6  -2  -1  221.28   13.40
   6  -2   1  181.88   12.10
  -6  -2  -1  187.28   11.60
  -6  -2  -1  189.98   10.00
  -6  -2  -1  177.58   11.30
   6  -2   1  162.28   11.60
   6  -2   1  176.48   12.50
   6  -2   1  196.88   10.60
  -6   2  -1  175.38   11.30
   6   2   1  168.28   12.00
  -6   2  -1  189.08   12.70
  -6   2  -1  179.08   12.10
   6   2   1  202.78   11.80
  -6   2  -1  195.68   10.10
   6   2   1  177.28    9.80
   6   2   1  181.98   11.90
   6   2   1  173.48   12.50
  -6   2  -1  177.58   11.40
   6   2   1  191.38   12.40
   7  -2   1 2902.31   94.69
  -7  -2  -1 3026.60   94.59
   7  -2   1 2974.20   94.39
  -7  -2  -1 2981.20   94.49
   7  -2   1 2752.62   93.99
  -7  -2  -1 2910.51   93.99
  -7  -2  -1 2953.70   94.89
   7  -2   1 3007.60   94.69
   7  -2   1 2952.20   92.09
  -7  -2  -1 2864.61   93.69
   7  -2   1 2952.90   93.99
  -7  -2  -1 2839.42   93.99
  -7  -2  -1 2948.61   94.69
   7   2   1 2913.41   93.99
  -7   2  -1 2943.91   94.19
  -7   2  -1 2984.00   93.79
  -7   2  -1 2910.81   94.19
  -7   2  -1 2900.51   94.49
   7   2   1 2938.01   91.59
  -7   2  -1 2977.70   92.19
   7   2   1 2922.41   94.09
   7   2   1 2933.41   94.89
   7   2   1 2851.81   93.79
   7   2   1 3048.20   94.99
  -7   2  -1 2937.61   94.89
   7   2   1 2974.60   94.59
  -8  -2  -1 1779.92   62.19
  -8  -2  -1 1842.72   58.79
   8  -2   1 1821.42   61.99
   8  -2   1 1810.62   61.99
  -8  -2  -1 1828.32   61.99
   8  -2   1 1785.62   61.39
  -8  -2  -1 1800.02   61.79
  -8  -2  -1 1859.41   61.69
   8  -2   1 1818.22   59.49
   8  -2   1 1851.01   62.19
   8  -2   1 1788.42   61.79
  -8  -2  -1 1799.02   61.79
   8   2   1 1859.01   61.69
   8   2   1 1791.72   61.29
  -8   2  -1 1828.72   62.69
  -8   2  -1 1728.73   61.89
  -8   2  -1 1802.42   61.09
   8   2   1 1820.72   62.39
   8   2   1 1794.92   62.39
   8   2   1 1814.52   61.39
  -8   2  -1 1826.22   61.89
  -8   2  -1 1847.82   61.79
   8   2   1 1686.93   61.69
   9  -2   1  734.33   32.00
   9  -2   1  772.22   32.30
   9  -2   1  815.92   33.10
  -9  -2  -1  749.13   28.20
  -9  -2  -1  802.02   32.20
  -9  -2  -1  770.42   32.70
  -9  -2  -1  750.52   32.10
  -9  -2  -1  769.32   32.50
  -9  -2  -1  747.93   31.70
   9  -2   1  821.22   33.00
   9  -2   1  783.62   31.80
   9  -2   1  776.42   30.00
  -9   2  -1  743.53   31.50
   9   2   1  736.63   32.20
  -9   2  -1  842.92   31.80
  -9   2  -1  805.92   32.80
   9   2   1  751.42   32.40
  -9   2  -1  810.82   31.80
   9   2   1  823.32   32.50
  -9   2  -1  757.82   29.70
   9   2   1  794.62   32.20
  -9   2  -1  735.33   31.90
   9   2   1  755.92   30.70
   9   2   1  831.22   31.60
   9   2   1  777.52   32.60
  10  -2   1   27.90    7.50
 -10  -2  -1   30.70    9.00
  10  -2   1   25.80    8.20
 -10  -2  -1   20.40    9.30
 -10  -2  -1   17.70    8.90
  10  -2   1   34.60    9.70
 -10  -2  -1   24.60    8.60
 -10  -2  -1   27.80    6.10
  10  -2   1   21.80    7.90
  10  -2   1   22.00    8.80
 -10  -2  -1   23.30    9.70
  10   2   1   25.30    9.50
  10   2   1    5.60    8.00
 -10   2  -1   31.10    7.90
 -10   2  -1   17.00    9.50
 -10   2  -1   38.10    8.40
 -10   2  -1   20.50    8.00
  10   2   1   15.20    8.20
 -10   2  -1   29.20    5.80
 -10   2  -1   49.60   10.90
  10   2   1   26.60    8.10
  10   2   1   38.30    9.80
  10   2   1   28.90    9.00
  10   2   1   22.00    8.30
 -10   2  -1   39.30    7.60
 -11  -2  -1    7.50    7.70
 -11  -2  -1    7.60    9.00
 -11  -2  -1   -4.40    7.50
 -11  -2  -1    4.10    9.10
  11  -2   1    3.20    8.20
  11  -2   1    2.70    8.60
  11  -2   1    6.10    9.00
 -11  -2  -1    5.90    9.70
  11  -2   1    1.80    6.70
  11  -2   1    7.00    7.10
 -11  -2  -1    2.10    5.10
  11   2   1    1.40    8.70
 -11   2  -1   19.20    8.10
  11   2   1   11.80   10.00
 -11   2  -1   -1.90    7.10
 -11   2  -1    6.20    9.60
  11   2   1   -1.80    8.20
 -11   2  -1    6.30    7.60
 -11   2  -1    2.70    6.50
 -11   2  -1    5.50    6.70
  11   2   1    0.10    7.70
 -11   2  -1    5.80    2.80
  11   2   1   -1.50   10.10
 -11   2  -1    5.00    3.00
  11   2   1    2.10    7.50
  11   2   1   12.30    9.00
  12  -2   1   86.29   14.30
 -12  -2  -1   56.29   12.60
  12  -2   1   88.09   12.90
  12  -2   1   74.69   13.00
 -12  -2  -1   83.89   13.40
  12  -2   1   98.89   11.80
 -12  -2  -1  105.59   13.50
 -12  -2  -1   75.99   12.50
 -12  -2  -1   92.09   13.20
  12   2   1   93.99   12.90
 -12   2  -1   84.99   12.00
 -12   2  -1   91.29    5.10
 -12   2  -1   61.09   13.30
 -12   2  -1   84.49    5.20
  12   2   1   59.39   12.70
 -12   2  -1   91.29   11.30
  12   2   1   93.19   14.90
  12   2   1   90.59   12.60
  12   2   1   94.19   13.90
 -12   2  -1  109.19   13.60
 -12   2  -1   82.19   14.50
  12   2   1   76.99   13.00
  12   2   1   88.39   13.80
 -12   2  -1   86.29   12.30
 -13  -2  -1   55.59   12.90
  13  -2   1   36.30   15.90
  13  -2   1   53.39   11.70
 -13  -2  -1   32.70   12.70
  13  -2   1   55.19   13.90
 -13  -2  -1   55.19   11.50
  13  -2   1   47.10   11.10
 -13  -2  -1   27.10   12.30
  13  -2   1   54.29   12.30
 -13   2  -1   44.40   10.20
 -13   2  -1   34.00   10.70
 -13   2  -1   27.90   11.20
  13   2   1   53.29   13.00
  13   2   1   43.30   13.20
 -13   2  -1   61.79   11.70
 -13   2  -1   42.50    3.20
 -13   2  -1   53.49   13.60
  13   2   1   50.19   13.00
 -13   2  -1   45.10   13.70
  13   2   1   45.50   12.30
 -13   2  -1   43.90    3.40
  14  -2   1  452.85   28.70
 -14  -2  -1  444.46   28.40
 -14  -2  -1  484.85   26.30
  14  -2   1  483.95   27.40
  14  -2   1  416.86   24.20
  14  -2   1  438.46   28.30
  14  -2   1  463.45   27.30
 -14  -2  -1  453.85   28.40
  14   2   1  461.25   27.70
 -14   2  -1  428.06   26.50
  14   2   1  457.55   26.70
 -14   2  -1  440.26   28.00
 -14   2  -1  434.96   23.80
  14   2   1  468.35   26.70
  14   2   1  456.95   25.60
 -14   2  -1  466.25   27.40
  14   2   1  450.15   28.10
 -15  -2  -1   27.60   13.60
  15  -2   1   21.30   12.20
  15  -2   1   29.00   11.70
  15  -2   1   30.40   11.90
  15  -2   1   12.70   12.10
 -15  -2  -1   20.90   13.40
  15  -2   1   13.10   13.60
  15   2   1   20.90   11.90
 -15   2  -1   37.80   14.80
  15   2   1   17.30   13.90
  15   2   1    5.30   12.30
  15   2   1   45.20   13.00
 -15   2  -1   18.20    9.90
 -15   2  -1   13.10   14.30
  15   2   1   27.00   12.40
  16  -2   1  146.79   16.80
 -16  -2  -1  124.19   19.90
  16  -2   1  195.08   23.00
  16  -2   1  157.08   19.60
  16  -2   1  164.08   21.30
 -16  -2  -1  145.09   21.10
  16   2   1  128.59   17.80
 -16   2  -1  176.88   21.30
  16   2   1  121.69   17.60
  16   2   1  160.48   19.90
  16   2   1  181.68   22.20
  17  -2   1  106.49   16.20
  17  -2   1   96.69   19.70
  17  -2   1   64.89   18.40
 -17  -2  -1   53.39   15.10
  17  -2   1   87.69   17.50
 -17  -2  -1  113.29   20.40
 -17   2  -1   88.29   19.30
  17   2   1  143.49   21.50
  17   2   1  105.39   18.70
  17   2   1  108.99   18.00
  17   2   1  129.19   19.80
  18  -2   1  443.96   32.90
  18  -2   1  412.66   28.40
 -18  -2  -1  396.56   32.00
 -18  -2  -1  446.36   32.10
  18  -2   1  455.15   32.80
  18  -2   1  323.97   30.00
  18   2   1  433.76   32.60
  18   2   1  428.16   30.90
  18   2   1  461.65   29.80
 -18   2  -1  373.06   31.20
  18   2   1  471.45   33.10
  19  -2   1   10.40   16.80
 -19  -2  -1    3.10   16.50
  19  -2   1   15.00   15.50
  19  -2   1   -6.10   13.10
 -19  -2  -1    6.80   17.80
  19  -2   1    8.60   15.20
  19   2   1    9.80   16.60
  19   2   1    2.60   13.20
  19   2   1    6.40   15.00
 -19   2  -1  -12.80   14.10
  20  -2   1   -9.30   17.00
 -20  -2  -1   -6.30    4.10
  20  -2   1   18.20   20.70
  20  -2   1   -2.50   14.60
 -20  -2  -1  -13.60   15.30
  20  -2   1  -12.60   16.50
 -20  -2  -1   -5.50    6.30
 -20  -2  -1   37.50   19.50
  20   2   1    7.20   17.00
  20   2   1    8.80   15.80
  20   2   1  -12.10   14.70
  20   2   1    5.30   15.60
 -20   2  -1   -7.80   16.60
  21  -2   1  115.59   22.80
  21  -2   1  184.18   24.10
 -21  -2  -1  205.08   25.70
  21  -2   1  170.98   27.00
 -21  -2  -1  265.17   30.50
  21  -2   1  162.48   24.30
 -21   2  -1  181.88   26.60
  21   2   1  177.68   24.30
  21   2   1  154.28   23.80
  21   2   1  174.28   26.10
  21   2   1  138.09   26.10
  22  -2   1  187.08   26.70
 -22  -2  -1  280.37   32.20
  22  -2   1  262.77   31.80
  22  -2   1  273.77   32.50
  22  -2   1  277.57   27.30
  22   2   1  304.67   32.10
 -22   2  -1  214.08   34.30
  22   2   1  241.58   27.00
  22   2   1  269.37   32.40
  22   2   1  269.27   29.20
  23  -2   1   -7.20   20.30
  23  -2   1  -14.10   18.30
  23  -2   1  -15.80   20.40
 -23  -2  -1   31.10   20.50
  23  -2   1   17.20   17.90
  23   2   1  -17.60   20.50
  23   2   1    4.10   17.80
  23   2   1  -21.00   20.30
 -23   2  -1    2.40   19.20
  23   2   1   -4.40   19.10
  24  -2   1   66.99   24.70
 -24  -2  -1   34.70   23.10
  24  -2   1   12.50   21.60
  24  -2   1   19.00   19.90
  24  -2   1   59.29   25.40
 -24   2  -1   18.40   22.10
  24   2   1    9.90   22.70
  24   2   1  -30.20   19.90
  24   2   1   59.49   21.60
  24   2   1   61.09   25.90
 -24  -3   1   43.30   21.20
  24  -3  -1   14.60   16.40
  24  -3  -1   -1.00   20.60
  24  -3  -1   45.40   22.20
  24  -3  -1   20.30   20.80
  24   3  -1   42.80   23.10
  24   3  -1    3.50   20.80
  24   3  -1   41.20   22.60
 -24   3   1   67.69   22.90
  24   3  -1   34.80   20.40
  23  -3  -1  -15.60   17.90
  23  -3  -1  -12.60   19.10
  23  -3  -1   -3.00   18.40
 -23  -3   1   28.50   24.10
  23   3  -1   53.39   20.70
 -23   3   1    0.10   20.00
  23   3  -1  -16.20   18.60
  23   3  -1   28.10   19.60
  23   3  -1   16.00   20.70
 -22  -3   1   21.20   19.00
  22  -3  -1   10.30   18.10
  22  -3  -1    1.60   14.00
  22  -3  -1  -26.80   16.00
  22  -3  -1   10.20   17.30
 -22   3   1   13.30   17.10
  22   3  -1  -26.10   16.50
  22   3  -1   10.00   17.30
  22   3  -1  -14.40   16.80
  22   3  -1  -11.40   17.40
 -21  -3   1   40.80   18.90
  21  -3  -1   59.59   15.40
 -21  -3   1   52.69    7.80
  21  -3  -1   56.19   20.60
  21  -3  -1   73.49   21.10
  21  -3  -1   49.80   19.50
  21   3  -1   50.69   19.70
  21   3  -1   53.19   18.60
  21   3  -1   48.10   18.70
 -21   3   1   20.20   18.00
  21   3  -1   66.29   19.90
 -20  -3   1   64.39   19.70
  20  -3  -1   22.80   13.70
 -20  -3   1   16.90   17.20
  20  -3  -1   -1.20   16.90
  20  -3  -1   57.39   18.90
  20   3  -1   70.99   18.60
  20   3  -1   53.49   18.80
 -20   3   1   30.40   18.10
  20   3  -1   27.80   16.10
  19  -3  -1  181.68   24.30
 -19  -3   1  155.58   23.00
  19  -3  -1  143.59   22.20
 -19  -3   1  182.58   23.90
  19  -3  -1  152.18   18.20
  19   3  -1  163.68   22.60
 -19   3   1  168.88   22.80
  19   3  -1  170.38   20.80
  19   3  -1  126.99   21.70
  18  -3  -1  286.57   27.20
  18  -3  -1  219.28   25.20
 -18  -3   1  254.67   25.10
  18  -3  -1  236.18   20.90
 -18  -3   1  278.07   23.50
  18  -3  -1  273.67   23.20
  18   3  -1  230.18   24.40
  18   3  -1  254.37   25.90
  18   3  -1  214.98   23.50
  18   3  -1  276.67   27.40
 -18   3   1  235.58   25.20
 -17  -3   1    2.80   13.90
  17  -3  -1   25.90   14.60
  17  -3  -1   35.80   15.20
 -17  -3   1    0.10   13.90
  17  -3  -1   54.99   16.10
  17  -3  -1   11.80   12.20
  17  -3  -1   17.80   11.50
  17   3  -1   19.40   14.00
  17   3  -1   37.40   14.90
  17   3  -1   35.40   15.80
 -17   3   1   48.60   11.90
  17   3  -1   41.90   15.30
 -17   3   1   21.60   13.80
  16  -3  -1   11.30   11.70
  16  -3  -1   11.80   10.20
 -16  -3   1    4.70   12.60
 -16  -3   1  -10.50   12.40
  16  -3  -1    0.00   13.10
 -16  -3   1   -4.30    6.40
  16  -3  -1    2.10   13.30
  16  -3  -1   -5.20   10.70
  16   3  -1   -7.50   11.80
  16   3  -1    1.00   11.00
  16   3  -1   -2.90    9.70
 -16   3   1   -4.80   10.80
  16   3  -1   11.10   12.90
  16   3  -1    1.10   11.30
 -16   3   1   -0.60    8.90
 -15  -3   1  166.08   15.30
  15  -3  -1  160.18   19.50
  15  -3  -1  173.28   15.90
  15  -3  -1  151.78   20.30
 -15  -3   1  172.98   19.60
  15  -3  -1  172.68   19.90
 -15  -3   1  176.98   18.20
  15  -3  -1  182.68   20.20
  15   3  -1  135.29   18.10
  15   3  -1  179.08   20.10
 -15   3   1  154.88   15.10
 -15   3   1  166.78   19.30
  15   3  -1  183.48   20.70
 -15   3   1  161.78   17.50
  15   3  -1  161.18   18.60
  15   3  -1  140.89   17.80
  14  -3  -1   27.30   12.50
  14  -3  -1   33.20    9.70
 -14  -3   1   35.00   10.90
 -14  -3   1   40.70   12.30
 -14  -3   1   14.90   10.20
  14  -3  -1   19.20   12.60
  14  -3  -1   16.30   11.50
  14  -3  -1   24.80   10.80
  14   3  -1   11.70   11.60
  14   3  -1   50.09   12.60
 -14   3   1   22.80   12.00
  14   3  -1   24.20   12.00
 -14   3   1   24.80   10.10
 -14   3   1   24.00    9.00
  14   3  -1   18.80   12.10
  14   3  -1   29.20   11.60
  13  -3  -1  336.97   22.60
  13  -3  -1  289.27   20.60
  13  -3  -1  289.57   22.00
  13  -3  -1  306.47   20.60
 -13  -3   1  347.27   22.50
  13  -3  -1  329.67   18.40
 -13  -3   1  301.87   19.90
 -13  -3   1  288.97   21.30
 -13  -3   1  350.46   21.80
 -13   3   1  315.87   17.40
 -13   3   1  323.97   21.70
  13   3  -1  329.37   20.60
  13   3  -1  333.57   22.10
  13   3  -1  309.77   21.70
 -13   3   1  322.97   21.20
  13   3  -1  312.87   21.60
  13   3  -1  308.37   22.00
 -13   3   1  306.97   20.70
  13   3  -1  291.47   21.60
 -12  -3   1  117.19   14.50
  12  -3  -1  118.79   14.40
  12  -3  -1  108.89   16.90
 -12  -3   1  114.29   14.30
  12  -3  -1  127.29   14.10
 -12  -3   1  111.99   14.70
 -12  -3   1  101.69   13.10
  12  -3  -1  115.69   14.20
 -12  -3   1   97.89   13.40
  12  -3  -1  122.69   11.10
  12   3  -1  110.49   13.10
 -12   3   1  114.39   11.50
  12   3  -1   99.29   14.00
  12   3  -1  105.69   15.30
 -12   3   1  120.99   14.70
 -12   3   1  115.49   14.20
  12   3  -1  125.99   14.60
 -12   3   1   98.19   13.10
  12   3  -1  130.49   14.80
  12   3  -1  134.19   14.00
 -12   3   1   99.89   12.80
  12   3  -1   97.49    9.90
  11  -3  -1  859.31   35.30
 -11  -3   1  794.92   35.10
 -11  -3   1  827.12   34.00
  11  -3  -1  890.31   36.30
  11  -3  -1  808.62   37.50
  11  -3  -1  862.51   31.20
 -11  -3   1  815.42   35.00
  11  -3  -1  846.22   34.70
 -11  -3   1  888.31   34.90
 -11  -3   1  838.52   34.30
  11  -3  -1  827.22   35.40
  11   3  -1  813.42   33.90
  11   3  -1  803.42   34.90
  11   3  -1  817.82   35.20
 -11   3   1  819.02   33.50
 -11   3   1  838.62   35.10
 -11   3   1  848.72   34.40
  11   3  -1  752.92   33.50
  11   3  -1  806.02   35.10
 -11   3   1  711.43   31.80
  11   3  -1  851.21   30.80
  10  -3  -1   20.20    8.10
 -10  -3   1   14.70    8.30
  10  -3  -1    6.30    9.10
  10  -3  -1   13.40    6.80
  10  -3  -1   10.50    7.60
 -10  -3   1   16.20    7.70
  10  -3  -1   16.90    6.00
 -10  -3   1    3.80    6.60
 -10  -3   1   13.50    7.80
 -10  -3   1   18.00    9.20
  10  -3  -1    9.50    6.40
  10   3  -1    1.20    7.00
 -10   3   1    7.50    7.60
 -10   3   1   14.00    1.60
 -10   3   1   21.90    7.50
  10   3  -1   12.10    7.50
  10   3  -1   13.50    6.10
 -10   3   1    2.70    8.10
  10   3  -1   20.00    7.20
  10   3  -1    0.70    7.40
  10   3  -1    9.60    6.60
 -10   3   1    6.90    5.80
  10   3  -1   23.80    9.10
  -9  -3   1   41.50    7.90
   9  -3  -1   32.80    8.40
   9  -3  -1   35.20    6.10
   9  -3  -1   32.40   10.00
   9  -3  -1   39.80    7.80
   9  -3  -1   40.20    8.10
  -9  -3   1   38.20    8.30
  -9  -3   1   52.79    9.90
  -9  -3   1   36.60    8.20
  -9  -3   1   26.30    8.40
   9  -3  -1   37.80    8.80
   9   3  -1   36.20    7.70
   9   3  -1   32.50    8.70
   9   3  -1   47.20    9.90
  -9   3   1   44.50    9.30
   9   3  -1   33.80    8.20
  -9   3   1   44.00    7.60
   9   3  -1   44.40    8.50
   9   3  -1   52.09    7.30
  -9   3   1   53.49    9.70
  -9   3   1   47.80    6.50
  -9   3   1   37.30    3.30
  -9   3   1   38.70    8.10
   8  -3  -1 2732.53   87.79
  -8  -3   1 2826.42   88.09
   8  -3  -1 2646.84   87.09
  -8  -3   1 2736.03   87.59
   8  -3  -1 2713.23   87.89
  -8  -3   1 2538.75   87.39
   8  -3  -1 2636.54   81.49
   8  -3  -1 2721.53   83.59
   8  -3  -1 2680.83   88.19
  -8  -3   1 2684.83   86.29
  -8  -3   1 2544.45   86.59
  -8  -3   1 2670.73   84.99
   8  -3  -1 2701.33   87.39
   8   3  -1 2645.34   87.79
   8   3  -1 2767.62   87.99
  -8   3   1 2750.12   87.09
   8   3  -1 2636.24   84.89
  -8   3   1 2727.63   87.79
  -8   3   1 2665.13   86.89
   8   3  -1 2640.94   87.49
   8   3  -1 2671.03   86.19
   8   3  -1 2632.34   87.39
  -8   3   1 2718.23   81.49
  -8   3   1 2644.24   87.29
  -8   3   1 2694.53   83.59
  -7  -3   1  240.58   13.80
  -7  -3   1  230.58   12.40
   7  -3  -1  231.68   10.60
   7  -3  -1  221.08   14.20
   7  -3  -1  237.48   14.00
   7  -3  -1  235.58   14.70
   7  -3  -1  225.58    9.60
   7  -3  -1  227.98   13.40
  -7  -3   1  235.48   14.80
  -7  -3   1  238.28   14.40
   7  -3  -1  255.77   14.00
  -7  -3   1  214.68   14.90
   7  -3  -1  237.68   15.60
  -7  -3   1  218.28   14.40
   7   3  -1  229.88   13.50
  -7   3   1  212.28   14.20
   7   3  -1  216.58   14.30
  -7   3   1  246.78   10.20
  -7   3   1  263.87   15.10
   7   3  -1  228.68   14.60
   7   3  -1  236.38   13.60
   7   3  -1  242.08   12.50
   7   3  -1  252.77   15.20
  -7   3   1  226.08   12.90
  -7   3   1  230.08   10.70
   6  -3  -1  433.96   19.70
   6  -3  -1  468.35   19.90
  -6  -3   1  414.36   19.80
   6  -3  -1  425.66   15.80
  -6  -3   1  467.65   19.80
   6  -3  -1  454.85   16.00
  -6  -3   1  422.66   19.90
   6  -3  -1  440.96   20.50
  -6  -3   1  442.26   18.50
   6  -3  -1  430.56   18.70
  -6  -3   1  475.05   21.40
   6  -3  -1  446.36   19.40
  -6  -3   1  471.25   18.50
  -6   3   1  441.06   19.20
   6   3  -1  498.25   20.00
   6   3  -1  454.55   20.70
   6   3  -1  452.25   18.40
  -6   3   1  444.36   20.10
   6   3  -1  384.36   19.50
  -6   3   1  455.45   19.80
   6   3  -1  404.66   19.50
  -6   3   1  450.85   15.90
  -6   3   1  451.85   19.20
  -6   3   1  409.96   17.10
   6   3  -1  449.76   20.10
  -5  -3   1  144.19    9.20
   5  -3  -1  137.99    7.40
   5  -3  -1  118.59    9.10
   5  -3  -1  129.49    9.90
  -5  -3   1  143.59    8.80
   5  -3  -1  141.59    9.90
   5  -3  -1  140.59   10.20
  -5  -3   1  145.59    9.60
   5  -3  -1  155.68   10.00
  -5  -3   1  142.79   10.40
  -5  -3   1  123.79   10.20
   5   3  -1  143.49    9.20
   5   3  -1  144.09    9.30
   5   3  -1  125.29    8.10
  -5   3   1  138.09   10.00
  -5   3   1  134.29    6.30
  -5   3   1  132.39    9.50
   5   3  -1  140.79    9.40
   5   3  -1  122.49    9.10
  -5   3   1  139.59    9.60
  -5   3   1  143.59    9.70
   5   3  -1  129.79   10.10
   5   3  -1  126.69   10.10
  -5   3   1  142.89    7.50
   4  -3  -1   68.69    7.80
   4  -3  -1   68.29    7.60
  -4  -3   1   71.29    7.00
   4  -3  -1   67.89    7.30
  -4  -3   1   76.09    7.30
   4  -3  -1   70.59    7.00
  -4  -3   1   62.39    7.70
  -4  -3   1   66.29    5.80
  -4  -3   1   65.49    8.10
   4  -3  -1   64.89    5.50
   4  -3  -1   65.99    6.60
  -4  -3   1   63.29    7.40
  -4  -3   1   46.10    6.20
   4   3  -1   62.39    7.30
   4   3  -1   77.79    7.40
  -4   3   1   68.29    5.80
  -4   3   1   57.89    6.70
   4   3  -1   71.69    5.80
   4   3  -1   75.49    7.90
   4   3  -1   51.99    6.30
   4   3  -1   88.29    8.30
   4   3  -1   67.59    7.20
  -4   3   1   61.39    7.30
  -4   3   1   68.49    7.00
  -4   3   1   62.19    3.60
  -4   3   1   68.29    7.60
  -3  -3   1  721.03   25.40
   3  -3  -1  684.13   24.40
  -3  -3   1  665.63   25.20
   3  -3  -1  737.13   25.60
  -3  -3   1  731.03   25.90
   3  -3  -1  711.83   24.10
  -3  -3   1  723.63   25.40
   3  -3  -1  707.63   25.30
   3  -3  -1  698.73   25.40
  -3  -3   1  671.73   25.00
  -3  -3   1  682.33   23.10
   3  -3  -1  709.73   26.00
  -3  -3   1  736.83   25.50
  -3   3   1  681.93   21.70
   3   3  -1  682.93   25.40
   3   3  -1  709.93   25.70
  -3   3   1  707.03   25.40
   3   3  -1  697.63   25.70
   3   3  -1  681.13   24.70
   3   3  -1  708.03   23.10
   3   3  -1  668.73   25.30
  -3   3   1  690.43   24.30
   3   3  -1  725.33   25.80
  -3   3   1  672.33   23.90
  -3   3   1  697.33   25.10
  -3   3   1  658.63   24.90
   3   3  -1  672.53   25.20
  -2  -3   1 2857.71   88.29
  -2  -3   1 2782.92   88.29
  -2  -3   1 2845.22   88.59
  -2  -3   1 2911.01   88.79
  -2  -3   1 2828.82   87.99
   2  -3  -1 2881.51   88.49
   2  -3  -1 2821.32   87.59
  -2  -3   1 2859.01   87.79
   2  -3  -1 2755.22   85.29
   2  -3  -1 2848.01   88.19
  -2  -3   1 2784.82   88.29
  -2  -3   1 2748.72   85.79
   2  -3  -1 2780.32   88.49
   2  -3  -1 2857.81   88.39
   2  -3  -1 2881.51   87.59
  -2   3   1 2882.71   88.29
   2   3  -1 2896.11   88.49
  -2   3   1 2811.92   88.09
   2   3  -1 2930.21   88.49
  -2   3   1 2847.11   88.49
  -2   3   1 2819.02   87.49
   2   3  -1 2869.11   88.69
   2   3  -1 2887.91   88.49
   2   3  -1 2807.92   87.99
   2   3  -1 2763.32   85.69
  -2   3   1 2752.72   85.19
  -2   3   1 2839.42   88.29
   2   3  -1 2830.72   87.69
   2   3  -1 2840.12   88.49
  -2   3   1 2878.81   88.19
  -2   3   1 2780.22   87.39
   0  -3  -1 7713.73  235.38
   0  -3   1 7751.52  236.08
   0   3   1 7662.73  235.38
   0   3  -1 7655.73  235.78
   1  -3   1 2832.92   91.99
   1  -3   1 2976.30   91.89
  -1  -3  -1 2907.61   91.99
  -1  -3  -1 2998.40   91.39
  -1  -3  -1 2926.31   90.59
   1  -3   1 2919.81   91.79
   1  -3   1 2994.50   92.09
  -1  -3  -1 2987.50   91.59
  -1  -3  -1 2956.10   90.89
   1  -3   1 2915.91   91.29
  -1  -3  -1 2890.61   92.29
   1  -3   1 3038.90   90.39
   1   3   1 2988.60   90.59
   1   3   1 2920.81   91.29
  -1   3  -1 2925.11   90.19
   1   3   1 2927.11   91.69
  -1   3  -1 2940.31   91.89
   1   3   1 2931.91   92.19
  -1   3  -1 2872.81   92.89
   1   3   1 2950.70   92.09
   1   3   1 3007.40   92.09
   1   3   1 3056.19   90.99
  -1   3  -1 2892.11   91.39
  -1   3  -1 3023.70   91.99
   1   3   1 3048.09   91.59
  -2  -3  -1 1371.16   45.00
   2  -3   1 1321.77   45.00
  -2  -3  -1 1389.96   45.40
  -2  -3  -1 1367.56   45.00
   2  -3   1 1373.76   43.90
  -2  -3  -1 1379.16   44.00
   2  -3   1 1402.96   43.50
   2  -3   1 1364.66   45.40
   2  -3   1 1352.76   44.20
   2  -3   1 1374.86   45.50
   2  -3   1 1377.96   45.30
  -2  -3  -1 1369.26   44.60
  -2  -3  -1 1349.56   44.50
  -2  -3  -1 1422.46   45.90
   2   3   1 1369.26   43.90
   2   3   1 1398.96   45.50
  -2   3  -1 1320.77   44.20
   2   3   1 1376.36   44.60
   2   3   1 1388.86   45.10
  -2   3  -1 1304.87   45.20
   2   3   1 1376.76   44.50
  -2   3  -1 1350.46   44.90
  -2   3  -1 1331.77   44.90
   2   3   1 1344.47   45.60
  -2   3  -1 1360.26   45.40
  -2   3  -1 1381.86   43.30
  -3  -3  -1 1523.95   52.39
   3  -3   1 1597.34   51.59
   3  -3   1 1541.45   51.49
   3  -3   1 1565.84   50.49
  -3  -3  -1 1544.55   51.89
   3  -3   1 1552.14   51.39
  -3  -3  -1 1570.34   51.49
   3  -3   1 1545.35   51.69
   3  -3   1 1561.54   49.90
   3  -3   1 1571.74   49.60
  -3  -3  -1 1551.94   51.29
  -3  -3  -1 1531.75   51.39
  -3  -3  -1 1519.95   50.19
  -3   3  -1 1593.04   51.79
   3   3   1 1553.24   50.49
   3   3   1 1604.74   50.99
  -3   3  -1 1608.64   49.60
   3   3   1 1490.25   50.79
  -3   3  -1 1604.84   51.39
   3   3   1 1559.74   51.89
   3   3   1 1584.94   51.79
  -3   3  -1 1524.15   51.29
  -3   3  -1 1608.24   53.19
  -3   3  -1 1547.95   49.90
   3   3   1 1557.14   50.09
   3   3   1 1534.15   51.59
   4  -3   1    6.70    3.80
  -4  -3  -1   10.10    6.00
  -4  -3  -1    0.90    4.70
   4  -3   1   10.40    3.70
  -4  -3  -1   11.60    5.00
  -4  -3  -1   13.60    5.80
   4  -3   1    8.20    5.40
  -4  -3  -1    6.00    4.40
  -4  -3  -1    4.80    4.50
   4  -3   1    0.80    5.30
   4  -3   1   10.40    4.60
  -4  -3  -1   11.40    5.60
   4  -3   1   12.90    5.20
   4  -3   1    1.20    3.20
   4   3   1    6.10    4.30
   4   3   1    7.60    4.50
  -4   3  -1   13.20    6.00
  -4   3  -1   16.50    5.70
  -4   3  -1    3.60    3.70
  -4   3  -1    8.40    4.70
  -4   3  -1    6.00    3.10
   4   3   1    3.50    4.10
   4   3   1    9.00    5.40
  -4   3  -1    6.70    5.20
   4   3   1    8.10    4.50
   4   3   1    4.10    4.90
   4   3   1    8.20    5.10
   5  -3   1  565.34   23.50
  -5  -3  -1  567.24   22.70
   5  -3   1  538.05   20.90
   5  -3   1  555.94   23.10
  -5  -3  -1  567.24   22.40
  -5  -3  -1  581.54   23.50
   5  -3   1  544.55   22.80
   5  -3   1  573.24   22.90
  -5  -3  -1  554.74   21.70
  -5  -3  -1  586.54   23.90
   5  -3   1  533.65   19.90
   5   3   1  550.74   23.20
  -5   3  -1  574.14   20.20
   5   3   1  587.44   23.10
   5   3   1  569.04   21.90
  -5   3  -1  475.75   24.10
  -5   3  -1  589.54   23.00
   5   3   1  526.95   22.70
   5   3   1  529.55   22.80
  -5   3  -1  551.74   20.20
  -5   3  -1  564.64   23.40
   5   3   1  553.34   21.90
  -6  -3  -1  706.83   27.70
   6  -3   1  732.93   29.50
  -6  -3  -1  739.83   29.10
  -6  -3  -1  757.92   30.20
   6  -3   1  777.92   29.70
   6  -3   1  748.53   29.70
  -6  -3  -1  723.13   28.50
   6  -3   1  718.23   25.40
  -6  -3  -1  725.43   29.20
   6  -3   1  768.52   30.10
   6  -3   1  751.32   29.10
  -6  -3  -1  758.92   29.70
   6  -3   1  709.83   27.20
  -6   3  -1  743.53   29.00
  -6   3  -1  732.63   29.70
   6   3   1  766.12   30.20
  -6   3  -1  751.02   29.30
   6   3   1  769.22   28.60
  -6   3  -1  762.82   29.30
   6   3   1  764.02   29.40
   6   3   1  767.42   27.80
   6   3   1  760.62   29.00
   6   3   1  754.92   29.30
   6   3   1  766.92   29.90
  -6   3  -1  724.73   25.70
  -6   3  -1  754.62   26.40
  -7  -3  -1  231.48   14.90
   7  -3   1  260.17   16.20
   7  -3   1  247.58   10.90
   7  -3   1  269.27   16.40
  -7  -3  -1  251.37   16.10
   7  -3   1  251.17   15.50
   7  -3   1  242.78   15.90
   7  -3   1  247.68   12.90
  -7  -3  -1  260.77   14.90
   7  -3   1  244.58   14.40
  -7  -3  -1  236.38   15.20
  -7  -3  -1  263.47   15.50
  -7   3  -1  226.98   14.50
  -7   3  -1  244.28   14.80
   7   3   1  215.58   13.80
   7   3   1  240.68   14.70
   7   3   1  262.17   16.10
  -7   3  -1  260.07   15.30
  -7   3  -1  256.17   12.40
  -7   3  -1  234.98   11.30
   7   3   1  267.37   16.20
  -7   3  -1  240.98   15.40
   7   3   1  311.27   17.20
   7   3   1  240.48   13.30
  -7   3  -1  257.57   16.30
   7   3   1  243.38   16.30
  -8  -3  -1   42.50    8.60
   8  -3   1   41.10    9.00
   8  -3   1   42.10    9.60
   8  -3   1   45.90    9.30
   8  -3   1   37.80    8.00
  -8  -3  -1   24.20    7.10
  -8  -3  -1   47.70    9.20
  -8  -3  -1   49.30    9.50
  -8  -3  -1   42.70    9.50
  -8  -3  -1   52.29    8.40
   8  -3   1   29.90    8.40
   8  -3   1   31.20    6.60
  -8   3  -1   38.60    8.70
  -8   3  -1   55.79   10.00
  -8   3  -1   34.10    8.70
  -8   3  -1   25.30    5.80
   8   3   1   20.60    8.40
  -8   3  -1   49.50    5.20
   8   3   1   35.90    8.70
   8   3   1   46.70   10.40
  -8   3  -1   28.50    9.00
   8   3   1   38.00    9.70
   8   3   1   33.50    8.60
   8   3   1   42.50    7.30
  -8   3  -1   43.20    8.60
   8   3   1   46.10    8.80
  -9  -3  -1  530.75   25.60
   9  -3   1  531.65   22.70
  -9  -3  -1  553.34   26.10
  -9  -3  -1  540.45   25.50
   9  -3   1  552.04   25.10
   9  -3   1  533.55   26.10
   9  -3   1  552.34   25.70
  -9  -3  -1  534.05   26.40
  -9  -3  -1  574.94   25.80
   9  -3   1  538.15   25.60
  -9  -3  -1  494.25   25.50
   9  -3   1  538.15   25.20
  -9   3  -1  506.65   24.60
   9   3   1  526.55   24.80
  -9   3  -1  552.54   26.60
  -9   3  -1  565.54   25.90
   9   3   1  553.84   22.50
  -9   3  -1  571.94   19.70
   9   3   1  562.64   26.30
   9   3   1  554.74   25.40
  -9   3  -1  543.25   25.10
  -9   3  -1  504.55   25.70
   9   3   1  556.74   26.50
   9   3   1  592.54   26.70
   9   3   1  547.35   25.10
  10  -3   1  274.57   17.30
 -10  -3  -1  255.67   18.20
 -10  -3  -1  250.77   16.50
 -10  -3  -1  257.67   18.80
  10  -3   1  242.18   17.60
 -10  -3  -1  273.37   17.40
  10  -3   1  284.97   18.30
  10  -3   1  247.08   17.60
  10  -3   1  249.38   15.20
 -10  -3  -1  221.88   15.90
  10  -3   1  256.27   17.10
  10   3   1  255.37   18.60
  10   3   1  262.17   17.10
 -10   3  -1  253.97   17.10
  10   3   1  257.47   18.80
  10   3   1  270.67   20.00
 -10   3  -1  275.67   16.70
  10   3   1  243.98   18.40
 -10   3  -1  265.27   18.80
 -10   3  -1  267.17   14.50
 -10   3  -1  266.67   11.20
 -10   3  -1  256.27   17.00
  11  -3   1  165.68   16.80
 -11  -3  -1  113.49   14.80
 -11  -3  -1  141.79   11.90
  11  -3   1  137.39   15.10
  11  -3   1  154.68   15.90
  11  -3   1  168.28   12.60
 -11  -3  -1  146.19   15.90
 -11  -3  -1  147.29   17.50
  11  -3   1  139.49   16.20
 -11  -3  -1  150.58   16.60
 -11  -3  -1  147.59   15.70
  11  -3   1  170.98   18.10
 -11   3  -1  135.99   15.10
  11   3   1  152.58   15.40
  11   3   1  150.68   16.30
 -11   3  -1  136.69   15.00
  11   3   1  143.59   15.20
  11   3   1  138.39   15.40
  11   3   1  150.08   14.60
  11   3   1  144.29   14.10
  11   3   1  174.78   16.50
 -11   3  -1  139.49   12.40
  12  -3   1   70.79   11.00
 -12  -3  -1   44.70   10.80
  12  -3   1   82.39   14.30
 -12  -3  -1   92.99   16.10
  12  -3   1   98.59   13.80
  12  -3   1  102.79   14.20
 -12  -3  -1   62.69   14.10
 -12  -3  -1   76.19   13.90
 -12  -3  -1   86.79   10.00
  12  -3   1  106.79   15.10
  12   3   1   94.69   15.80
  12   3   1  106.49   13.90
  12   3   1  138.19   16.50
  12   3   1   88.99   12.50
 -12   3  -1   81.09   12.60
 -12   3  -1   68.39   10.10
  12   3   1  100.79   14.60
 -12   3  -1   83.39    5.60
 -12   3  -1  121.09   16.00
 -12   3  -1   64.69   11.90
  12   3   1   89.39   14.60
  12   3   1  109.29   14.00
  13  -3   1  446.16   26.60
 -13  -3  -1  405.16   24.10
  13  -3   1  384.76   24.20
 -13  -3  -1  397.76   19.60
 -13  -3  -1  410.66   25.10
  13  -3   1  336.07   24.50
  13  -3   1  432.26   22.50
  13  -3   1  437.56   25.20
 -13  -3  -1  335.07   28.80
 -13  -3  -1  394.66   25.30
 -13   3  -1  393.76   13.00
  13   3   1  407.86   26.10
 -13   3  -1  382.06   22.90
 -13   3  -1  409.86   21.20
 -13   3  -1  328.67   23.40
  13   3   1  384.66   23.30
  13   3   1  388.76   25.20
  13   3   1  421.06   24.40
 -13   3  -1  384.16   23.90
 -13   3  -1  375.16   12.80
  13   3   1  408.16   25.20
  14  -3   1   59.49   13.20
  14  -3   1   42.20   12.80
 -14  -3  -1   45.40   11.70
 -14  -3  -1   56.29    9.20
  14  -3   1   49.70   13.80
  14  -3   1   46.90   15.00
 -14  -3  -1   51.19   13.50
 -14  -3  -1   59.29   15.60
  14   3   1   55.19   14.00
 -14   3  -1   57.29   10.60
  14   3   1   38.10   11.70
  14   3   1   37.60   12.10
  14   3   1   38.00   11.80
  14   3   1   62.19   12.60
 -14   3  -1   43.30   14.10
 -15  -3  -1  371.26   19.80
  15  -3   1  415.46   23.60
  15  -3   1  343.97   25.00
 -15  -3  -1  428.06   28.40
  15  -3   1  391.56   28.40
  15  -3   1  434.56   27.70
 -15  -3  -1  376.66   27.70
  15  -3   1  353.76   29.40
  15   3   1  375.06   27.20
 -15   3  -1  391.66   22.30
  15   3   1  457.35   26.30
 -15   3  -1  394.56   27.80
  15   3   1  402.86   28.30
  15   3   1  381.26   27.50
  16  -3   1  126.69   20.20
  16  -3   1  101.79   19.30
  16  -3   1  148.39   17.10
 -16  -3  -1   90.19   18.80
  16  -3   1  115.19   18.30
 -16  -3  -1  112.89   11.70
 -16  -3  -1  118.79   17.40
  16   3   1  137.09   18.00
 -16   3  -1  102.49   18.90
  16   3   1  132.09   19.60
  16   3   1  127.89   20.60
  16   3   1  129.69   20.70
  17  -3   1  658.63   37.30
  17  -3   1  543.55   36.70
  17  -3   1  638.54   31.90
 -17  -3  -1  642.44   37.50
 -17  -3  -1  638.14   37.80
  17  -3   1  594.84   34.70
 -17  -3  -1  616.74   26.70
  17   3   1  614.24   34.30
  17   3   1  687.83   38.00
 -17   3  -1  665.33   38.00
  17   3   1  655.33   35.50
  17   3   1  609.04   36.50
  18  -3   1  222.28   21.60
 -18  -3  -1  172.28   13.50
  18  -3   1  162.28   22.40
 -18  -3  -1  173.58   22.80
 -18  -3  -1  185.98   24.00
  18  -3   1  215.08   25.90
 -18   3  -1  160.48   22.30
  18   3   1  151.68   20.90
  18   3   1  192.88   25.10
  18   3   1  154.38   22.30
 -19  -3  -1   71.09   19.90
  19  -3   1  105.09   18.90
 -19  -3  -1   70.49   20.40
  19  -3   1   70.89   19.30
 -19  -3  -1   78.59   10.10
  19  -3   1   74.79   20.90
  19  -3   1  122.29   17.00
  19   3   1   90.09   20.30
  19   3   1   84.99   18.90
  19   3   1  104.39   19.30
  19   3   1  103.59   19.20
 -19   3  -1  114.69   22.90
  20  -3   1   11.80   16.60
 -20  -3  -1   29.80   17.80
  20  -3   1    4.60   16.60
  20  -3   1   14.40   13.40
 -20  -3  -1   24.70   18.40
  20   3   1    5.90   15.20
  20   3   1   21.70   17.50
  20   3   1   -1.40   16.50
 -20   3  -1   -3.70   15.60
 -21  -3  -1   37.40   19.50
  21  -3   1   62.39   19.90
  21  -3   1   47.20   16.00
  21  -3   1   64.99   21.20
  21  -3   1    8.90   18.70
  21   3   1   46.80   20.10
 -21   3  -1   32.80   20.00
  21   3   1   48.80   16.90
  21   3   1   30.20   19.20
  21   3   1   59.79   18.90
  22  -3   1  206.68   29.30
 -22  -3  -1  128.29   25.00
  22  -3   1  109.19   20.20
 -22  -3  -1  136.09   25.60
  22  -3   1  152.68   26.60
  22  -3   1  154.88   27.20
  22   3   1  182.88   27.00
 -22   3  -1  158.28   26.40
  22   3   1  176.08   28.40
  22   3   1  147.19   27.00
  22   3   1  141.49   24.10
  23  -3   1  -16.50   20.60
  23  -3   1   13.40   17.40
  23  -3   1   31.70   21.80
 -23  -3  -1   54.49   23.60
  23  -3   1   55.69   22.90
  23   3   1   64.89   19.90
 -23   3  -1   24.80   20.30
  23   3   1    1.30   20.60
  23   3   1    2.80   20.10
  23   3   1   44.60   21.60
 -24  -4   1   15.20   20.90
  24  -4  -1  -30.40   19.70
  24  -4  -1  -34.30   19.80
  24  -4  -1   13.10   20.30
  24   4  -1  -33.10   18.50
  24   4  -1  -21.50   17.30
  24   4  -1   10.80   21.20
 -24   4   1    4.00   19.30
  24   4  -1   23.90   27.50
 -23  -4   1    8.20   19.30
  23  -4  -1   48.70   23.80
  23  -4  -1   40.40   16.90
  23  -4  -1    3.70   20.10
  23  -4  -1   44.90   19.30
  23   4  -1    5.40   19.90
  23   4  -1   -2.60   18.50
  23   4  -1   29.20   22.00
  23   4  -1  135.69   25.20
  22  -4  -1    5.50   19.00
  22  -4  -1   38.50   14.70
  22  -4  -1   33.80   20.80
  22  -4  -1   15.80   19.00
  22  -4  -1   54.99   19.00
 -22  -4   1    9.10   18.80
  22   4  -1   65.99   19.90
  22   4  -1   15.50   19.10
  22   4  -1  -12.90   18.00
 -22   4   1   14.90   19.60
  22   4  -1   17.90   13.80
 -21  -4   1  300.77   30.80
  21  -4  -1  219.28   28.70
  21  -4  -1  253.57   29.60
 -21  -4   1  266.97   16.30
  21  -4  -1  297.57   28.60
  21  -4  -1  228.08   26.50
 -21  -4   1  258.47   29.30
  21  -4  -1  273.17   24.00
 -21   4   1  283.67   31.00
  21   4  -1  257.97   30.20
  21   4  -1  283.87   30.80
  21   4  -1  252.67   29.10
  21   4  -1  293.97   28.90
 -20  -4   1  162.28   24.30
 -20  -4   1  155.18   24.50
  20  -4  -1  166.88   22.50
 -20  -4   1  167.98   14.00
  20  -4  -1  178.48   19.30
  20  -4  -1  207.98   27.20
  20  -4  -1  141.29   24.00
  20  -4  -1  184.68   24.90
  20   4  -1  182.68   25.20
  20   4  -1  147.79   24.70
 -20   4   1  136.99   23.00
  20   4  -1  156.98   26.20
  20   4  -1  151.78   23.80
  19  -4  -1   29.70   17.30
  19  -4  -1    2.10   18.30
 -19  -4   1    9.30   14.10
  19  -4  -1   17.30   14.30
 -19  -4   1    8.50   15.60
  19  -4  -1   31.20   11.90
 -19  -4   1   31.40    8.50
  19  -4  -1   24.10   15.60
  19   4  -1    5.40   16.10
  19   4  -1    2.60   12.10
 -19   4   1   42.40   18.50
  19   4  -1   21.10   16.50
  19   4  -1   28.60   16.50
  18  -4  -1   19.10   15.90
  18  -4  -1   14.00   12.30
  18  -4  -1   -4.10    9.70
 -18  -4   1   -3.90   14.60
 -18  -4   1    9.00   14.70
  18  -4  -1    4.20   14.80
 -18  -4   1   10.00    7.70
  18   4  -1   -0.10   14.50
 -18   4   1    8.90   15.70
  18   4  -1   15.60   14.40
  18   4  -1    3.10   15.10
  18   4  -1   21.80   16.00
 -18   4   1   13.20   11.10
  17  -4  -1  309.27   21.10
 -17  -4   1  330.47   26.60
  17  -4  -1  316.67   27.50
 -17  -4   1  262.37   17.60
  17  -4  -1  316.57   27.60
 -17  -4   1  260.47   25.00
  17  -4  -1  311.67   26.90
  17   4  -1  324.77   27.30
 -17   4   1  326.97   20.70
  17   4  -1  357.76   28.00
 -17   4   1  246.48   25.70
  17   4  -1  286.27   26.00
  17   4  -1  327.47   27.50
  16  -4  -1  148.69   20.70
  16  -4  -1  128.39   14.50
 -16  -4   1  123.89   18.90
 -16  -4   1  151.98   19.40
  16  -4  -1  138.49   20.40
  16  -4  -1  175.68   21.50
  16  -4  -1  172.38   19.90
 -16  -4   1  150.58   13.40
 -16   4   1  123.59   19.10
  16   4  -1  131.79   17.70
  16   4  -1  149.29   20.70
  16   4  -1  143.49   19.40
  16   4  -1  180.48   21.20
  16   4  -1  135.99   19.20
  15  -4  -1   84.19   17.40
 -15  -4   1  168.68   20.10
  15  -4  -1  130.39   18.80
  15  -4  -1  125.39   16.30
 -15  -4   1  158.18   13.90
 -15  -4   1  140.09   18.40
  15  -4  -1  144.19   19.60
  15  -4  -1  153.68   14.40
  15   4  -1  154.88   18.50
  15   4  -1  125.39   18.50
  15   4  -1  137.29   18.60
  15   4  -1  147.89   19.60
 -15   4   1  126.09   18.50
  15   4  -1  168.58   19.60
 -15   4   1  147.09   14.50
  14  -4  -1   11.70    9.40
 -14  -4   1   12.30    9.80
 -14  -4   1   11.90   10.70
  14  -4  -1    8.30   10.20
  14  -4  -1   15.50   12.40
 -14  -4   1    7.30   11.00
  14  -4  -1   10.90    8.10
  14  -4  -1   21.40   13.00
 -14  -4   1    5.90    7.10
  14   4  -1   21.40   10.50
  14   4  -1   11.10   12.20
 -14   4   1    3.30    7.10
 -14   4   1   -4.20   11.40
  14   4  -1    0.20   11.10
  14   4  -1    8.10   10.80
 -14   4   1   14.40    9.50
  14   4  -1    9.10    7.50
  13  -4  -1  380.06   23.60
  13  -4  -1  404.66   24.80
  13  -4  -1  389.06   23.20
 -13  -4   1  365.26   23.20
  13  -4  -1  380.96   19.40
 -13  -4   1  374.26   22.40
 -13  -4   1  334.17   21.40
  13  -4  -1  358.86   25.30
 -13  -4   1  386.56   19.60
 -13  -4   1  397.66   24.90
  13  -4  -1  381.86   24.70
  13   4  -1  341.47   21.90
 -13   4   1  364.06   22.50
  13   4  -1  374.56   22.80
  13   4  -1  348.87   24.50
 -13   4   1  351.36   18.70
  13   4  -1  378.46   24.60
  13   4  -1  409.96   24.50
 -13   4   1  393.96   22.20
 -13   4   1  351.66   23.60
  13   4  -1  400.16   19.80
  12  -4  -1   21.20   11.50
  12  -4  -1   35.40   10.00
  12  -4  -1   18.40    7.20
 -12  -4   1   15.60   11.00
  12  -4  -1    6.90   10.50
 -12  -4   1   17.10   10.30
  12  -4  -1   31.90    9.80
 -12  -4   1   37.00    8.00
 -12  -4   1   25.40   10.00
  12  -4  -1   15.50    8.30
 -12   4   1    9.50    9.20
  12   4  -1   -4.80   11.50
 -12   4   1   26.50    9.20
 -12   4   1   49.50   12.00
  12   4  -1   25.80   10.90
  12   4  -1   15.00   10.00
  12   4  -1   24.30   10.10
  12   4  -1   20.00    7.60
 -12   4   1   11.80    6.70
  12   4  -1   29.10   10.30
 -12   4   1   30.70   10.40
  11  -4  -1  340.87   21.80
 -11  -4   1  352.46   21.70
  11  -4  -1  392.16   23.60
 -11  -4   1  359.46   18.80
 -11  -4   1  399.96   22.60
  11  -4  -1  365.36   25.80
 -11  -4   1  358.96   22.60
 -11  -4   1  388.26   21.20
  11  -4  -1  381.76   21.20
  11  -4  -1  397.86   21.40
 -11  -4   1  366.96   21.00
  11  -4  -1  385.76   21.80
  11  -4  -1  386.16   17.60
 -11   4   1  368.96   20.60
  11   4  -1  401.46   22.90
  11   4  -1  356.16   20.90
  11   4  -1  386.66   22.90
  11   4  -1  367.16   22.30
  11   4  -1  380.76   20.70
 -11   4   1  396.46   13.40
 -11   4   1  369.06   22.00
 -11   4   1  346.57   22.00
 -11   4   1  403.86   21.00
  11   4  -1  362.06   18.80
 -10  -4   1  844.12   35.00
 -10  -4   1  857.91   35.40
  10  -4  -1  812.02   34.10
  10  -4  -1  819.82   29.90
 -10  -4   1  870.01   33.80
  10  -4  -1  817.42   35.40
 -10  -4   1  848.62   34.70
  10  -4  -1  808.32   34.30
 -10  -4   1  809.22   35.20
  10  -4  -1  790.82   33.30
  10  -4  -1  836.02   34.50
 -10  -4   1  846.02   32.10
  10  -4  -1  829.92   35.90
  10  -4  -1  825.42   27.40
 -10   4   1  864.71   34.00
  10   4  -1  806.92   35.20
  10   4  -1  854.71   34.80
 -10   4   1  823.92   35.20
 -10   4   1  825.32   29.90
 -10   4   1  856.41   33.90
 -10   4   1  835.02   38.00
  10   4  -1  848.02   32.20
  10   4  -1  833.62   35.40
  10   4  -1  859.11   33.40
   9  -4  -1   41.70    8.40
  -9  -4   1   47.00    8.70
  -9  -4   1   67.89   11.60
  -9  -4   1   42.20    9.10
   9  -4  -1   49.80   10.40
   9  -4  -1   58.39    9.70
  -9  -4   1   41.90   10.20
   9  -4  -1   52.79   11.20
   9  -4  -1   71.19   10.10
   9  -4  -1   43.10    9.20
   9  -4  -1   47.60    5.10
  -9  -4   1   48.20    8.60
  -9  -4   1   49.50    8.50
  -9  -4   1   48.30    8.90
   9   4  -1   53.39   10.60
   9   4  -1   60.19   10.30
   9   4  -1   55.89    9.00
  -9   4   1   46.30    9.60
  -9   4   1   51.49    5.20
   9   4  -1   51.29    9.20
  -9   4   1   34.50    8.90
  -9   4   1   46.00    8.80
   9   4  -1   65.99    9.10
  -9   4   1   67.69    9.90
   9   4  -1   44.30   10.20
  -9   4   1   62.29    6.50
  -8  -4   1  176.58   15.10
   8  -4  -1  180.48   15.30
   8  -4  -1  173.28   13.90
   8  -4  -1  179.18   13.30
  -8  -4   1  181.48   14.60
   8  -4  -1  158.68   13.40
  -8  -4   1  192.68   14.20
   8  -4  -1  178.28   13.10
  -8  -4   1  190.58   12.60
  -8  -4   1  191.48   12.40
   8  -4  -1  189.68   14.50
   8  -4  -1  177.18    9.20
  -8  -4   1  165.88   13.00
   8   4  -1  166.38   12.80
  -8   4   1  188.48   13.50
  -8   4   1  149.79    9.00
   8   4  -1  176.08   14.10
   8   4  -1  184.68   13.10
  -8   4   1  172.58   12.90
  -8   4   1  181.58    9.50
  -8   4   1  180.88   14.20
   8   4  -1  179.28   14.70
   8   4  -1  188.38   13.80
   8   4  -1  142.19   12.10
   8   4  -1  167.28   14.70
  -8   4   1  172.68   14.00
   7  -4  -1  286.47   12.60
  -7  -4   1  271.97   15.90
   7  -4  -1  285.07   17.00
  -7  -4   1  288.07   17.40
   7  -4  -1  303.77   16.00
   7  -4  -1  275.77   16.10
   7  -4  -1  314.47   18.20
  -7  -4   1  295.67   15.80
   7  -4  -1  259.97   16.20
  -7  -4   1  278.57   15.10
   7  -4  -1  285.47   15.80
  -7  -4   1  301.37   17.80
  -7   4   1  279.47   16.00
   7   4  -1  292.37   14.90
   7   4  -1  288.27   15.80
   7   4  -1  286.57   16.90
  -7   4   1  299.77   15.40
  -7   4   1  282.47   15.80
   7   4  -1  280.87   17.20
  -7   4   1  286.47   12.70
   7   4  -1  282.27   15.30
   7   4  -1  284.47   17.10
  -7   4   1  274.87   11.70
  -7   4   1  280.47   16.90
   7   4  -1  287.97   17.40
  -6  -4   1   59.19   11.00
  -6  -4   1   62.59    9.70
   6  -4  -1   58.99    8.80
  -6  -4   1   64.69   10.00
   6  -4  -1   58.89    8.60
   6  -4  -1   59.69    6.20
  -6  -4   1   58.19    7.50
   6  -4  -1   68.49    9.40
   6  -4  -1   47.20    8.50
  -6  -4   1   63.19    9.40
  -6  -4   1   53.99    7.90
   6  -4  -1   67.69    8.70
   6  -4  -1   41.10    7.30
   6   4  -1   66.09    8.80
   6   4  -1   44.30    8.20
   6   4  -1   63.99    9.40
  -6   4   1   42.80    8.60
  -6   4   1   60.99    4.90
  -6   4   1   61.09    8.60
   6   4  -1   56.69    8.10
  -6   4   1   58.59    6.40
  -6   4   1   49.99    9.00
   6   4  -1   58.49    8.30
   6   4  -1   58.09    8.50
   5  -4  -1  177.48   12.50
  -5  -4   1  184.28   12.90
   5  -4  -1  167.68   13.20
  -5  -4   1  188.98   12.50
   5  -4  -1  176.98   11.90
   5  -4  -1  179.98   10.00
   5  -4  -1  178.28   11.40
  -5  -4   1  179.28   11.20
   5  -4  -1  183.88   11.20
  -5  -4   1  155.48    9.90
  -5  -4   1  166.88   12.70
  -5   4   1  173.18   10.10
  -5   4   1  199.68   10.20
   5   4  -1  160.48   12.10
   5   4  -1  164.78   11.50
   5   4  -1  174.98   12.20
   5   4  -1  174.98    9.40
  -5   4   1  161.58   12.10
  -5   4   1  163.78   10.50
   5   4  -1  153.38   12.10
  -5   4   1  189.08   12.60
  -5   4   1  178.28    7.30
   5   4  -1  147.49   12.10
   5   4  -1  175.78   11.50
  -4  -4   1  951.40   34.10
  -4  -4   1  950.40   33.90
   4  -4  -1  941.91   32.90
   4  -4  -1  927.91   34.00
   4  -4  -1  927.01   34.60
   4  -4  -1  961.90   32.10
  -4  -4   1  960.30   34.60
  -4  -4   1  937.61   33.80
   4  -4  -1  930.91   34.10
  -4  -4   1  925.61   31.10
  -4   4   1  959.90   33.50
  -4   4   1  936.91   32.20
   4   4  -1  911.91   30.90
   4   4  -1  944.51   33.80
  -4   4   1  918.71   29.20
  -4   4   1  937.71   33.90
   4   4  -1  903.11   33.70
   4   4  -1  879.21   33.50
   4   4  -1  932.91   34.50
   4   4  -1  964.60   34.30
  -4   4   1  878.21   33.00
  -4   4   1  907.21   32.50
   4   4  -1  926.61   33.30
   3  -4  -1 3013.50   96.99
   3  -4  -1 3026.70   96.99
   3  -4  -1 3188.38   96.89
   3  -4  -1 3006.40   95.59
  -3  -4   1 3126.69   93.69
   3  -4  -1 3079.19   96.59
  -3  -4   1 3099.09   96.89
   3  -4  -1 3089.89   95.39
  -3  -4   1 3059.29   96.29
  -3  -4   1 3041.80   96.69
  -3  -4   1 3100.89   97.39
  -3  -4   1 3086.59   99.19
  -3  -4   1 3066.19   96.19
  -3  -4   1 3029.80   96.79
  -3   4   1 3024.10   92.49
  -3   4   1 3097.29   95.39
   3   4  -1 3132.19   97.09
  -3   4   1 3006.00   95.39
   3   4  -1 3000.70   93.49
   3   4  -1 2924.91   96.19
   3   4  -1 3023.50   96.59
   3   4  -1 3080.19   97.09
  -3   4   1 3097.59   96.79
  -3   4   1 3053.59   96.39
   3   4  -1 3089.69   95.99
   3   4  -1 3212.68   97.79
   3   4  -1 3002.30   99.29
   2  -4  -1  335.47   12.20
   2  -4  -1  334.87   15.80
  -2  -4   1  349.27   15.20
  -2  -4   1  367.06   15.90
  -2  -4   1  330.57   12.60
  -2  -4   1  328.17   15.10
  -2  -4   1  311.97   16.10
  -2  -4   1  286.87   14.90
  -2  -4   1  330.77   15.90
   2  -4  -1  331.97   14.90
   2  -4  -1  327.37   15.40
   2  -4  -1  364.46   15.80
   2  -4  -1  356.26   16.10
  -2   4   1  328.17   15.20
   2   4  -1  346.67   16.10
  -2   4   1  327.27   15.80
  -2   4   1  326.47   15.60
   2   4  -1  333.77   15.60
   2   4  -1  332.47   15.00
  -2   4   1  341.27   14.60
  -2   4   1  332.67   14.90
   2   4  -1  335.57   15.90
  -2   4   1  318.57   12.20
   2   4  -1  324.67   16.00
   2   4  -1  342.07   12.50
   2   4  -1  360.66   16.10
  -2   4   1  346.17   15.00
  -2   4   1  339.17   15.90
  -2   4   1  348.27   15.90
   2   4  -1  335.37   15.20
   1  -4  -1    8.70    5.10
   1  -4  -1    2.00    3.50
  -1  -4   1   -1.80    2.50
  -1  -4   1    2.40    3.90
   1  -4  -1    1.00    3.60
  -1  -4   1    2.60    3.80
   1  -4  -1    1.20    4.40
  -1  -4   1   -0.80    5.00
   1  -4  -1    4.70    2.80
   1  -4  -1    5.80    5.40
   1  -4  -1    4.70    4.60
  -1  -4   1    2.20    4.90
  -1  -4   1    0.50    4.60
  -1  -4   1   -6.30    5.20
   1   4  -1    7.20    3.80
  -1   4   1   -0.20    3.50
  -1   4   1    0.70    4.60
  -1   4   1    1.40    4.90
   1   4  -1   -0.60    3.70
  -1   4   1    3.10    4.30
  -1   4   1    6.40    2.90
  -1   4   1   -1.60    4.10
   1   4  -1   -2.50    3.70
   1   4  -1    7.30    4.70
   1   4  -1    2.80    4.60
  -1   4   1    4.50    5.00
  -1   4   1   -2.00    4.50
   1   4  -1   -3.00    4.90
   0  -4  -1  164.28   10.30
   0  -4   1  164.38   11.10
   0  -4   1  173.18    9.80
   0  -4   1  167.98   10.40
   0  -4  -1  162.08    8.80
   0  -4   1  168.48    9.40
   0  -4  -1  176.88    8.80
   0  -4  -1  155.98   11.10
   0  -4  -1  139.69   10.30
   0  -4  -1  155.78   10.30
   0  -4   1  164.08    8.80
   0  -4  -1  182.38   10.80
   0  -4   1  180.18   11.60
   0   4  -1  156.38    8.80
   0   4   1  162.68   10.30
   0   4   1  162.68   10.60
   0   4  -1  155.88    9.60
   0   4   1  173.08   10.70
   0   4   1  167.58   10.80
   0   4  -1  149.09    9.80
   0   4  -1  149.49    9.50
   0   4   1  168.68    8.90
   0   4   1  178.68   10.00
   0   4  -1  169.88    9.00
   0   4   1  170.98   10.00
   0   4   1  176.48   11.10
   1  -4   1  215.48   12.10
  -1  -4  -1  200.78   10.50
  -1  -4  -1  216.08   12.00
   1  -4   1  216.08   11.50
   1  -4   1  214.58   11.60
  -1  -4  -1  218.98   12.00
  -1  -4  -1  201.18   11.00
   1  -4   1  207.58   10.40
  -1  -4  -1  226.98   12.40
  -1  -4  -1  213.68   10.60
   1  -4   1  199.88   12.20
   1  -4   1  211.28   11.70
   1   4   1  200.08   12.30
  -1   4  -1  212.18   11.30
   1   4   1  223.48   11.70
   1   4   1  220.38   11.70
  -1   4  -1  215.48   11.80
   1   4   1  221.88   11.50
   1   4   1  196.88   10.70
   1   4   1  211.08   12.30
   1   4   1  214.18   10.40
  -1   4  -1  214.38   10.40
   1   4   1  216.38   11.60
  -1   4  -1  214.18   10.20
  -1   4  -1  206.18   11.50
   2  -4   1  155.38    9.80
   2  -4   1  143.29   11.10
   2  -4   1  149.19   10.80
   2  -4   1  149.79    8.80
  -2  -4  -1  153.98   10.30
  -2  -4  -1  153.08   10.50
   2  -4   1  138.59   10.30
  -2  -4  -1  171.68   11.10
  -2  -4  -1  142.59   10.70
  -2  -4  -1  160.48   11.50
   2  -4   1  171.78   11.30
  -2  -4  -1  156.88    9.20
  -2  -4  -1  166.68   11.10
   2   4   1  148.89   11.20
  -2   4  -1  153.38   11.10
   2   4   1  161.18   10.30
   2   4   1  172.98   10.50
   2   4   1  162.38   10.00
  -2   4  -1  149.69    8.50
  -2   4  -1  139.09   11.30
  -2   4  -1  141.29    8.00
  -2   4  -1  172.48   10.00
  -2   4  -1  151.28   11.00
   2   4   1  157.28   11.00
   2   4   1  160.78    9.90
  -2   4  -1  155.28    9.90
   2   4   1  149.79    8.90
   2   4   1  159.88   10.70
  -3  -4  -1    6.80    4.20
   3  -4   1   11.20    4.90
   3  -4   1    0.30    5.00
  -3  -4  -1    2.00    4.30
  -3  -4  -1   10.10    6.20
   3  -4   1    9.80    6.30
  -3  -4  -1    9.10    4.60
  -3  -4  -1   -4.90    5.70
   3  -4   1    8.90    5.70
   3  -4   1    9.00    4.00
  -3   4  -1    2.10    5.20
   3   4   1    4.60    4.70
   3   4   1   -0.70    4.60
  -3   4  -1    8.30    6.20
   3   4   1   -0.40    4.80
  -3   4  -1    4.10    3.80
  -3   4  -1    9.10    4.90
  -3   4  -1    3.50    5.40
   3   4   1    4.10    5.50
   3   4   1    7.70    5.60
   3   4   1    1.40    5.50
   3   4   1    9.60    6.20
   3   4   1    9.90    4.20
   4  -4   1   97.59    9.80
  -4  -4  -1  102.09    8.90
  -4  -4  -1   92.09   10.30
  -4  -4  -1  108.49   10.10
   4  -4   1   94.99    8.20
   4  -4   1   94.99   10.30
   4  -4   1   78.09    8.40
   4  -4   1   96.49   10.80
   4  -4   1   90.19    9.20
   4  -4   1  103.09    8.40
  -4  -4  -1   88.59   10.30
  -4  -4  -1   89.49    9.20
   4   4   1   92.19   10.30
   4   4   1   96.89    9.10
   4   4   1   66.39    8.60
  -4   4  -1   99.89    8.50
   4   4   1   78.29    8.70
  -4   4  -1   93.29    9.80
  -4   4  -1  107.79    8.20
   4   4   1   82.09    9.00
   4   4   1   80.39    9.10
   4   4   1   94.29   10.50
  -4   4  -1   91.99    9.50
   5  -4   1   70.49    9.30
  -5  -4  -1   79.69    9.90
  -5  -4  -1   76.29    8.70
   5  -4   1   74.59    7.30
  -5  -4  -1   77.39    9.30
   5  -4   1   62.29    8.50
  -5  -4  -1   79.69   10.00
   5  -4   1   58.09    8.20
   5  -4   1   70.39    7.50
  -5  -4  -1   83.39   10.20
   5  -4   1   70.69   10.00
  -5  -4  -1   62.89    8.40
  -5   4  -1   71.89    7.50
  -5   4  -1   58.39    9.60
  -5   4  -1   89.79    9.70
   5   4   1   68.89    9.30
  -5   4  -1   69.79    8.50
   5   4   1   63.19    9.80
  -5   4  -1   69.69    6.20
   5   4   1   74.19    9.40
   5   4   1   67.89    9.80
   5   4   1   69.99    8.20
   5   4   1   64.29    8.70
  -5   4  -1   70.19    8.50
   6  -4   1  221.48   13.80
  -6  -4  -1  203.08   14.70
  -6  -4  -1  211.08   14.30
   6  -4   1  183.28   12.50
  -6  -4  -1  171.78   13.00
   6  -4   1  212.98   15.40
   6  -4   1  184.48   10.60
   6  -4   1  200.28   15.00
   6  -4   1  204.18   13.60
  -6  -4  -1  198.58   12.70
  -6  -4  -1  233.18   14.40
  -6  -4  -1  191.78   13.00
  -6  -4  -1  199.38   14.10
   6  -4   1  206.98   13.10
   6   4   1  192.88   14.60
  -6   4  -1  243.18   14.80
  -6   4  -1  210.18   13.00
  -6   4  -1  222.88   15.30
   6   4   1  191.18   12.60
   6   4   1  195.98   13.40
   6   4   1  214.18   13.30
   6   4   1  196.18   13.00
  -6   4  -1  202.88   10.60
  -6   4  -1  195.98   11.30
  -6   4  -1  227.08   14.00
   6   4   1  184.78   15.00
  -7  -4  -1  336.57   20.20
   7  -4   1  348.97   20.00
  -7  -4  -1  380.26   19.70
  -7  -4  -1  394.86   18.30
   7  -4   1  415.36   19.80
   7  -4   1  373.56   17.60
  -7  -4  -1  362.36   18.50
   7  -4   1  364.46   15.50
   7  -4   1  346.97   18.10
   7  -4   1  360.16   20.20
  -7  -4  -1  338.47   20.10
   7  -4   1  371.66   19.70
  -7  -4  -1  358.86   20.00
  -7  -4  -1  338.07   18.40
  -7   4  -1  372.56   19.60
   7   4   1  378.76   20.30
   7   4   1  384.86   18.30
   7   4   1  383.36   20.70
  -7   4  -1  371.16   20.40
  -7   4  -1  392.46   19.70
   7   4   1  366.86   18.60
  -7   4  -1  348.47   15.80
   7   4   1  391.46   19.70
  -7   4  -1  371.66   18.60
   7   4   1  397.06   18.70
   7   4   1  397.36   20.30
  -8  -4  -1   86.29   11.80
   8  -4   1   85.99   11.90
  -8  -4  -1   99.99   12.40
   8  -4   1   94.69   11.40
   8  -4   1   88.39    7.30
  -8  -4  -1   70.99    9.30
  -8  -4  -1   83.29   10.90
   8  -4   1  102.59   12.80
   8  -4   1   78.69   11.20
   8  -4   1   92.69   11.30
  -8  -4  -1   93.19   11.80
  -8  -4  -1   87.19   12.00
   8  -4   1   88.19   10.00
   8   4   1   97.09   11.00
   8   4   1   82.09   10.10
   8   4   1   90.49   12.60
  -8   4  -1   90.09    8.20
   8   4   1   83.09   11.80
  -8   4  -1  100.19   12.00
  -8   4  -1  103.09   11.00
  -8   4  -1   73.99   11.90
   8   4   1   85.79   11.40
  -8   4  -1   81.79    7.50
   8   4   1   87.99   11.90
  -8   4  -1   92.99   11.50
   8   4   1  102.29   12.70
   9  -4   1    2.40    3.90
   9  -4   1    7.90    7.80
  -9  -4  -1   14.80    6.50
  -9  -4  -1    3.30    8.90
  -9  -4  -1    6.30    7.70
  -9  -4  -1   -0.60    8.10
  -9  -4  -1    5.80    8.20
   9  -4   1    8.80    8.20
   9  -4   1    3.30    6.70
   9  -4   1  -11.00    8.30
   9  -4   1    2.60    7.90
  -9  -4  -1    3.70    7.00
   9  -4   1   19.90    8.50
   9   4   1    7.60    9.50
  -9   4  -1   16.10    7.60
  -9   4  -1    8.00    7.40
   9   4   1    6.60    8.20
   9   4   1   -6.30    7.00
   9   4   1   -0.60    6.70
   9   4   1   -5.80    5.90
  -9   4  -1    3.20    8.10
  -9   4  -1    8.10    7.50
  -9   4  -1    8.60    4.50
   9   4   1   17.00    9.10
 -10  -4  -1  214.98   17.50
  10  -4   1  234.58   18.50
  10  -4   1  256.37   19.00
 -10  -4  -1  219.08   14.50
  10  -4   1  227.68   16.00
 -10  -4  -1  224.88   19.00
 -10  -4  -1  226.28   18.70
 -10  -4  -1  215.28   16.80
 -10  -4  -1  259.27   18.20
  10  -4   1  233.48   15.90
  10  -4   1  228.68   16.50
  10  -4   1  252.07   16.80
  10   4   1  257.17   18.80
 -10   4  -1  237.98   17.10
 -10   4  -1  224.08   17.40
 -10   4  -1  224.08   11.40
 -10   4  -1  239.48   18.90
  10   4   1  251.47   18.80
  10   4   1  227.08   18.30
  10   4   1  246.98   17.90
 -10   4  -1  236.98   14.00
  10   4   1  234.38   16.80
  10   4   1  268.27   19.30
  10   4   1  219.38   15.10
 -11  -4  -1  278.37   16.40
  11  -4   1  287.67   19.90
  11  -4   1  277.67   20.70
  11  -4   1  273.77   20.10
 -11  -4  -1  290.37   21.60
  11  -4   1  265.57   20.70
 -11  -4  -1  286.57   21.80
 -11  -4  -1  269.37   19.10
 -11  -4  -1  282.57   20.70
  11  -4   1  319.27   20.00
 -11  -4  -1  268.97   20.10
  11   4   1  289.27   19.70
 -11   4  -1  285.57   18.30
 -11   4  -1  271.77   16.00
  11   4   1  271.27   18.50
 -11   4  -1  280.17   12.60
  11   4   1  280.47   16.40
  11   4   1  307.57   20.70
 -11   4  -1  289.97   19.00
 -11   4  -1  283.87   21.00
 -11   4  -1  289.27   19.10
  11   4   1  293.97   21.00
  11   4   1  326.67   21.80
  11   4   1  292.57   19.50
 -12  -4  -1   23.20    8.30
 -12  -4  -1    7.00   12.90
 -12  -4  -1    4.70    7.80
 -12  -4  -1   16.70    9.30
  12  -4   1    0.80   10.30
 -12  -4  -1   28.80   11.30
  12  -4   1   17.20   11.00
  12  -4   1    6.30    7.70
 -12   4  -1   10.10    9.10
  12   4   1   19.20    9.30
  12   4   1   -0.90   10.10
 -12   4  -1   14.30    9.50
 -12   4  -1   -4.90   10.80
 -12   4  -1    5.60    7.20
  12   4   1   15.90    9.50
 -12   4  -1    3.00    3.80
  12   4   1   18.30   11.20
  12   4   1    5.70    9.40
  13  -4   1  271.67   22.50
 -13  -4  -1  272.77   24.00
  13  -4   1  263.17   22.80
 -13  -4  -1  258.97   16.70
  13  -4   1  256.97   17.80
 -13  -4  -1  272.57   21.90
  13  -4   1  246.08   20.30
  13  -4   1  271.17   20.20
 -13  -4  -1  271.67   19.70
  13   4   1  298.07   21.50
  13   4   1  253.17   21.40
 -13   4  -1  263.17   22.60
  13   4   1  281.97   23.00
  13   4   1  255.27   22.10
  13   4   1  270.67   23.00
 -13   4  -1  261.67   20.70
 -13   4  -1  257.27   17.20
 -14  -4  -1   73.39   11.10
  14  -4   1   59.09   15.80
  14  -4   1   98.99   12.70
  14  -4   1   55.39   13.90
  14  -4   1   87.79   17.10
  14  -4   1   82.69   16.40
 -14  -4  -1  105.09   18.00
 -14  -4  -1   88.49   16.10
  14   4   1   67.09   15.80
  14   4   1  102.19   17.90
  14   4   1   85.69   16.60
  14   4   1   91.39   15.20
 -14   4  -1   83.29   15.70
 -14   4  -1   81.19   11.70
  14   4   1   75.09   14.00
 -15  -4  -1  609.54   36.10
  15  -4   1  624.24   36.40
  15  -4   1  680.03   36.80
  15  -4   1  653.33   35.20
  15  -4   1  671.33   30.10
 -15  -4  -1  620.54   28.40
 -15  -4  -1  688.73   35.60
  15   4   1  658.23   33.70
  15   4   1  672.73   36.00
 -15   4  -1  666.03   29.80
  15   4   1  646.14   36.30
  15   4   1  683.13   36.90
 -15   4  -1  570.04   34.80
 -16  -4  -1   56.29   10.90
 -16  -4  -1   92.89   18.70
  16  -4   1   81.89   17.80
  16  -4   1   31.40   16.80
  16  -4   1   66.49   18.20
  16  -4   1   71.99   13.10
 -16  -4  -1   93.19   19.30
  16   4   1   56.59   16.80
  16   4   1   98.09   16.30
 -16   4  -1   79.29   17.50
 -16   4  -1   63.19   11.50
  16   4   1   50.79   14.60
  16   4   1   53.49   14.10
  17  -4   1    6.70   14.80
  17  -4   1   -7.50   15.50
  17  -4   1    0.00   11.90
  17  -4   1   10.10   11.60
 -17  -4  -1   17.60   15.20
 -17  -4  -1    9.50   15.60
 -17  -4  -1   11.30    7.80
  17   4   1   29.00   16.10
 -17   4  -1   -8.00   14.40
  17   4   1   -4.60   10.60
  17   4   1   15.80   14.20
  17   4   1   -3.10   11.40
  18  -4   1  346.17   31.90
 -18  -4  -1  328.87   29.00
  18  -4   1  296.97   23.20
 -18  -4  -1  309.47   29.80
  18  -4   1  318.37   26.50
  18  -4   1  294.47   28.30
 -18  -4  -1  353.46   19.80
  18   4   1  276.57   26.00
  18   4   1  285.67   28.70
  18   4   1  336.27   31.70
 -18   4  -1  258.47   28.70
  18   4   1  307.57   30.50
 -19  -4  -1  233.28   26.40
  19  -4   1  257.87   29.10
  19  -4   1  172.88   27.70
  19  -4   1  204.88   26.20
 -19  -4  -1  204.58   26.10
 -19  -4  -1  233.68   16.80
  19   4   1  250.97   27.50
  19   4   1  187.78   23.20
  19   4   1  249.08   28.30
  19   4   1  166.88   25.40
 -19   4  -1  232.48   26.80
 -20  -4  -1    0.50   17.40
 -20  -4  -1   33.40    9.70
 -20  -4  -1   37.20   19.40
  20  -4   1   21.30   14.70
  20  -4   1   23.40   18.00
  20  -4   1   -4.00   17.70
  20   4   1   24.40   16.00
  20   4   1   50.29   20.60
 -20   4  -1   29.70   19.30
  20   4   1   22.40   18.50
  20   4   1   21.90   17.80
  21  -4   1   -1.80   19.30
  21  -4   1   12.20   18.30
 -21  -4  -1    9.40   18.00
  21  -4   1   18.30   16.40
  21  -4   1   -0.10   17.70
  21   4   1   -7.30   15.30
  21   4   1   45.30   19.60
  21   4   1   -0.20   18.10
  21   4   1   15.80   20.60
 -21   4  -1   14.10   18.70
  22  -4   1   37.40   19.30
 -22  -4  -1   35.40   21.50
 -22  -4  -1   18.30   19.80
  22  -4   1   13.30   21.40
  22  -4   1   27.20   16.90
  22  -4   1   13.40   21.20
 -22   4  -1   15.40   21.00
  22   4   1   11.10   20.30
  22   4   1   12.40   18.50
  22   4   1   66.59   19.30
  22   4   1   60.99   22.80
  23  -4   1  -14.70   20.30
 -23  -4  -1   -9.40   19.50
 -23  -4  -1   -9.70   19.00
  23  -4   1    3.60   16.80
  23  -4   1    6.10   20.90
  23   4   1   21.80   23.00
 -23   4  -1   25.30   21.40
  23   4   1  -22.10   20.20
  23   4   1  -10.60   17.90
  24  -5  -1  -29.80   18.10
  23  -5  -1   -4.30   19.80
 -23  -5   1   -5.60   19.80
  23  -5  -1   10.20   18.50
  23  -5  -1   -8.30   19.10
  23  -5  -1   -2.30   21.30
  23   5  -1   31.60   21.30
 -23   5   1  -19.20   18.50
  23   5  -1  -23.20   19.20
  23   5  -1  -32.30   17.20
  23   5  -1   16.20   21.20
 -22  -5   1  157.08   25.90
  22  -5  -1  145.39   26.10
  22  -5  -1  134.69   23.00
  22  -5  -1   83.59   23.10
  22  -5  -1  136.99   26.70
  22   5  -1  184.98   27.50
  22   5  -1  130.69   25.60
  22   5  -1  172.08   25.30
  22   5  -1  179.58   28.00
 -22   5   1  122.79   24.80
  21  -5  -1   23.10   19.00
  21  -5  -1   35.60   18.00
  21  -5  -1    9.60   19.90
  21  -5  -1   62.59   21.70
 -21  -5   1   23.00   19.30
 -21  -5   1   -1.20   16.90
  21   5  -1   14.60   18.50
  21   5  -1   -0.90   18.50
  21   5  -1   40.90   18.80
  21   5  -1   31.80   18.00
 -21   5   1   30.80   18.50
  20  -5  -1   32.40   14.80
  20  -5  -1   35.80   19.00
 -20  -5   1   34.90   18.90
  20  -5  -1   29.70   18.00
  20  -5  -1   41.20   18.00
 -20  -5   1   18.60   18.80
 -20   5   1   20.50   18.50
  20   5  -1   42.60   15.70
  20   5  -1   25.90   16.60
  20   5  -1   15.10   18.40
  20   5  -1   48.70   19.40
  19  -5  -1   52.29   19.10
  19  -5  -1   28.10   15.50
  19  -5  -1   20.60   16.80
 -19  -5   1   18.90   16.20
  19  -5  -1   39.40   19.10
 -19  -5   1   24.20   15.40
  19   5  -1   30.80   17.70
  19   5  -1   28.10   17.50
  19   5  -1   23.70   17.70
  19   5  -1   37.70   17.00
 -19   5   1   37.40   18.00
 -18  -5   1   11.60   15.30
  18  -5  -1   -0.40   13.70
 -18  -5   1   -7.20   13.80
  18  -5  -1   -7.50   16.60
  18  -5  -1  -11.10   16.10
  18  -5  -1   -5.80   15.30
  18   5  -1   -0.70   14.70
 -18   5   1   -8.30    7.70
  18   5  -1   -3.50   14.70
 -18   5   1  -25.20   13.90
  18   5  -1    2.00   14.80
  17  -5  -1   -9.60   14.60
  17  -5  -1   -8.50   13.50
 -17  -5   1    4.50   14.90
  17  -5  -1   -9.70   14.40
 -17  -5   1   22.60   14.10
  17  -5  -1    1.10   12.60
  17   5  -1   -4.40   15.10
 -17   5   1  -15.30   13.90
 -17   5   1   -5.80    8.30
  17   5  -1    2.70   12.80
  17   5  -1    6.40   15.40
  17   5  -1   19.20   14.10
  16  -5  -1  331.37   24.30
  16  -5  -1  287.47   26.00
 -16  -5   1  269.67   24.30
  16  -5  -1  344.67   27.70
 -16  -5   1  297.17   26.90
 -16  -5   1  319.27   20.20
  16  -5  -1  309.17   27.50
  16   5  -1  289.47   25.10
 -16   5   1  266.57   25.60
 -16   5   1  298.37   19.20
  16   5  -1  367.36   25.10
  16   5  -1  336.07   27.30
  16   5  -1  337.17   26.20
  15  -5  -1    6.70   11.70
 -15  -5   1    9.30    8.40
  15  -5  -1    6.70   10.00
  15  -5  -1    4.10   11.60
 -15  -5   1   -6.30   10.90
 -15  -5   1   -7.30   12.20
  15  -5  -1  -13.70    9.80
  15  -5  -1    8.50   13.60
  15   5  -1   -6.10   11.10
  15   5  -1    7.50    9.40
  15   5  -1    7.30   12.00
  15   5  -1   29.70   14.20
  15   5  -1    7.50   13.10
 -15   5   1    7.80    7.40
 -15   5   1   -3.10   12.40
  15   5  -1    2.30   10.50
 -14  -5   1    6.70   11.10
  14  -5  -1   -4.90   12.40
  14  -5  -1   -3.40   10.90
 -14  -5   1    6.90    8.10
 -14  -5   1    6.70   12.80
  14  -5  -1   23.70   11.10
  14  -5  -1   22.20   13.80
  14  -5  -1    7.20   12.50
  14   5  -1    8.50    9.30
  14   5  -1   -2.70   11.50
  14   5  -1    6.30    9.50
 -14   5   1   11.10   11.20
 -14   5   1   -3.50   11.90
  14   5  -1    2.90    9.70
 -14   5   1   13.00    7.10
  14   5  -1   16.30   11.50
  14   5  -1    8.80   11.40
  13  -5  -1   -5.50    9.80
 -13  -5   1   -4.50    9.80
  13  -5  -1  -11.70   11.30
  13  -5  -1    6.90   10.20
 -13  -5   1    5.50    8.90
 -13  -5   1  -12.60   10.50
  13  -5  -1   -4.90    7.90
 -13  -5   1    2.20   10.90
 -13  -5   1   -9.90    7.60
  13  -5  -1    2.70    9.40
  13   5  -1  -16.50   10.40
 -13   5   1    3.50    2.60
 -13   5   1   -0.10   11.30
  13   5  -1    6.00    9.50
 -13   5   1    0.30    6.10
 -13   5   1  -13.20    7.60
  13   5  -1   15.20    9.00
  13   5  -1   -6.30   11.20
  13   5  -1    2.20   11.70
  12  -5  -1 1745.23   62.09
  12  -5  -1 1764.92   63.49
 -12  -5   1 1749.22   60.49
 -12  -5   1 1669.63   62.49
  12  -5  -1 1799.42   65.49
 -12  -5   1 1737.73   61.89
  12  -5  -1 1714.43   64.49
 -12  -5   1 1642.84   64.09
 -12  -5   1 1791.12   64.19
  12  -5  -1 1721.83   63.19
  12   5  -1 1662.13   64.69
  12   5  -1 1698.83   63.39
 -12   5   1 1676.33   63.89
 -12   5   1 1709.93   62.09
  12   5  -1 1675.33   64.19
 -12   5   1 1651.83   62.59
 -12   5   1 1732.53   53.89
  12   5  -1 1743.83   60.09
  12   5  -1 1780.82   64.59
  12   5  -1 1665.23   64.09
 -11  -5   1  -12.60    8.90
 -11  -5   1    1.20    8.00
 -11  -5   1    4.80    7.40
  11  -5  -1    2.80    3.60
  11  -5  -1    4.20    7.60
  11  -5  -1   22.80    9.90
 -11  -5   1    2.00    8.80
  11  -5  -1    5.20   10.70
  11  -5  -1    1.10    9.00
 -11  -5   1    6.90    8.80
 -11   5   1    4.80    5.10
  11   5  -1    3.70    7.40
  11   5  -1   -7.10    9.20
 -11   5   1    4.30    4.00
  11   5  -1    6.50    8.00
 -11   5   1   -7.60    5.60
  11   5  -1    0.80    8.80
  11   5  -1   14.70   10.10
  11   5  -1    3.50   10.00
 -11   5   1    8.00    9.90
 -11   5   1   -1.90    8.10
 -11   5   1    3.80    8.90
  10  -5  -1   -8.80    6.90
 -10  -5   1  -15.00    6.50
 -10  -5   1    2.60    6.40
  10  -5  -1   -9.10    7.20
  10  -5  -1    6.70    8.30
 -10  -5   1   -7.50    7.70
  10  -5  -1    9.20    9.20
  10  -5  -1    3.70    3.90
 -10  -5   1    4.60    9.00
 -10  -5   1    9.00    7.60
  10  -5  -1    4.80   10.00
  10  -5  -1   -0.30   10.20
 -10  -5   1    7.70    7.50
  10   5  -1   -3.90    8.80
 -10   5   1    3.60    8.60
  10   5  -1   -3.50    7.50
  10   5  -1    4.80    9.30
 -10   5   1    3.80    8.70
  10   5  -1   -7.40    8.60
  10   5  -1   -0.90    7.10
 -10   5   1   -2.10    4.10
 -10   5   1   -1.20    5.50
  10   5  -1   -0.20    6.50
 -10   5   1    8.60    7.60
   9  -5  -1  100.79   14.60
   9  -5  -1   90.09    7.80
  -9  -5   1  101.39   11.00
   9  -5  -1  106.69   13.60
   9  -5  -1   87.69   11.40
  -9  -5   1   92.49   11.00
   9  -5  -1   71.79   12.60
  -9  -5   1  109.99   13.60
  -9  -5   1  100.69   13.60
   9  -5  -1   96.59   11.40
   9  -5  -1   87.29   11.20
  -9  -5   1  106.39   12.30
  -9   5   1   64.39   12.00
   9   5  -1   87.29   11.00
  -9   5   1  113.99   12.70
   9   5  -1   94.89   12.00
   9   5  -1  108.59   11.00
  -9   5   1   93.59    7.50
  -9   5   1   98.39    8.30
  -9   5   1  105.89   12.30
   9   5  -1   95.79   11.10
   9   5  -1   95.49   13.00
   9   5  -1  119.39   13.70
  -8  -5   1 2957.80   95.49
   8  -5  -1 2958.20   96.59
   8  -5  -1 2977.60   97.89
  -8  -5   1 2918.01   97.09
   8  -5  -1 2911.51   96.59
  -8  -5   1 2950.70   96.79
   8  -5  -1 3011.70   97.69
   8  -5  -1 2917.01   96.39
  -8  -5   1 2924.01   93.99
  -8  -5   1 2944.11   96.99
  -8  -5   1 2972.10   97.59
   8  -5  -1 2914.11   95.09
  -8  -5   1 2908.31   96.49
   8   5  -1 2938.91   97.19
  -8   5   1 2983.50   97.19
   8   5  -1 2992.10   97.39
   8   5  -1 2981.80   97.59
  -8   5   1 2967.30   97.29
  -8   5   1 2871.01   95.79
   8   5  -1 2915.41   95.29
   8   5  -1 2895.21   93.79
  -8   5   1 2915.41   90.29
   8   5  -1 2916.91   96.59
   8   5  -1 2908.31   97.19
  -8   5   1 2932.61   95.99
  -8   5   1 2973.80   91.99
   7  -5  -1    4.30    5.40
   7  -5  -1    4.80    7.10
  -7  -5   1   11.20    8.00
   7  -5  -1    0.20    7.70
  -7  -5   1   -0.40    7.70
  -7  -5   1    5.00    7.50
   7  -5  -1    2.70    7.50
  -7  -5   1    5.30    6.70
   7  -5  -1   -6.90    5.70
  -7  -5   1   13.20    6.60
   7  -5  -1   14.10    5.10
   7  -5  -1   12.60    8.50
  -7  -5   1    0.70    5.90
  -7  -5   1   27.50    9.50
   7   5  -1   20.10    7.20
  -7   5   1   10.60    7.10
  -7   5   1    6.80    7.40
   7   5  -1   15.00    6.30
  -7   5   1   16.80    5.60
  -7   5   1    4.20    7.30
   7   5  -1   12.40    5.40
   7   5  -1   21.00    6.90
  -7   5   1   23.10    6.90
   7   5  -1   -5.50    6.70
  -7   5   1   12.40    3.40
   7   5  -1    6.90    8.50
   7   5  -1    8.60    8.60
   7   5  -1   11.00    6.20
   6  -5  -1   62.59    7.30
   6  -5  -1   70.99   10.80
  -6  -5   1   79.39   10.30
   6  -5  -1   90.59   10.60
  -6  -5   1   87.19   10.20
   6  -5  -1   63.59   11.60
   6  -5  -1   66.69    9.10
  -6  -5   1   71.59    9.80
  -6  -5   1   83.09   11.10
  -6  -5   1   87.89   10.30
   6  -5  -1   67.19   10.60
  -6  -5   1   75.69    8.10
  -6  -5   1   83.79   11.10
  -6   5   1   82.79    8.30
   6   5  -1   83.99   10.80
  -6   5   1   77.89   10.20
   6   5  -1   78.89   10.30
   6   5  -1   83.99    8.10
   6   5  -1   83.69   10.80
   6   5  -1   83.49   11.50
  -6   5   1   98.99   11.20
  -6   5   1   98.89    9.60
  -6   5   1   81.09   10.10
   6   5  -1   85.09   10.90
   6   5  -1   80.09   10.20
  -6   5   1   70.29    5.20
  -6   5   1   73.39   10.70
   6   5  -1   68.29   10.60
  -5  -5   1  515.45   22.30
  -5  -5   1  490.15   23.00
   5  -5  -1  523.95   23.60
  -5  -5   1  476.45   19.40
   5  -5  -1  498.95   21.60
  -5  -5   1  506.45   22.60
  -5  -5   1  501.95   22.30
   5  -5  -1  468.45   21.50
   5  -5  -1  472.75   23.50
  -5  -5   1  476.45   23.20
  -5  -5   1  449.46   21.80
   5  -5  -1  463.45   19.90
   5  -5  -1  471.45   22.80
  -5   5   1  477.25   22.10
   5   5  -1  522.45   23.50
   5   5  -1  512.35   19.40
   5   5  -1  501.45   22.60
  -5   5   1  506.25   23.10
   5   5  -1  483.05   23.20
  -5   5   1  473.45   16.80
  -5   5   1  499.65   16.70
  -5   5   1  500.55   21.00
   5   5  -1  497.95   23.00
   5   5  -1  498.85   22.60
   5   5  -1  512.65   21.70
  -5   5   1  520.05   22.40
  -5   5   1  513.95   20.40
   5   5  -1  468.15   21.70
  -4  -5   1 1284.77   45.60
  -4  -5   1 1269.27   45.20
   4  -5  -1 1272.67   46.50
  -4  -5   1 1322.07   45.90
   4  -5  -1 1332.97   46.50
  -4  -5   1 1248.18   45.30
   4  -5  -1 1255.97   44.30
   4  -5  -1 1322.57   44.20
  -4  -5   1 1276.37   42.30
  -4  -5   1 1257.07   46.00
  -4  -5   1 1262.97   45.20
   4  -5  -1 1290.47   46.00
   4  -5  -1 1346.17   45.90
  -4   5   1 1293.77   45.10
  -4   5   1 1221.28   43.80
   4   5  -1 1314.17   45.90
   4   5  -1 1252.87   44.90
  -4   5   1 1304.17   46.00
   4   5  -1 1311.97   46.40
   4   5  -1 1279.17   42.00
   4   5  -1 1309.87   46.50
   4   5  -1 1316.27   45.50
   4   5  -1 1288.17   46.20
  -4   5   1 1270.47   40.30
  -4   5   1 1285.37   44.00
   4   5  -1 1322.77   45.60
  -4   5   1 1324.47   47.80
   3  -5  -1    8.70    6.80
  -3  -5   1    6.90    6.40
   3  -5  -1   10.60    5.20
  -3  -5   1   12.40    6.80
  -3  -5   1   17.60    6.50
  -3  -5   1   -2.00    6.70
  -3  -5   1    7.00    6.50
  -3  -5   1   11.40    7.00
   3  -5  -1   11.30    5.50
  -3  -5   1   18.60    6.20
  -3  -5   1   10.50    4.10
   3  -5  -1   10.10    7.60
   3  -5  -1   19.30    5.80
   3  -5  -1   12.50    6.80
   3   5  -1    5.30    6.40
   3   5  -1    3.50    5.70
  -3   5   1    9.70    6.60
   3   5  -1   13.50    6.00
   3   5  -1    6.10    3.50
   3   5  -1   11.60    7.10
  -3   5   1    7.90    6.50
   3   5  -1    4.30    5.10
  -3   5   1    9.00    5.50
   3   5  -1    7.90    6.20
  -3   5   1    7.70    3.40
   3   5  -1    7.50    6.70
  -3   5   1    5.60    6.80
  -3   5   1   13.70    5.50
  -3   5   1    9.50    5.20
  -2  -5   1   37.50    8.50
   2  -5  -1   40.40    7.10
   2  -5  -1   50.19    8.80
   2  -5  -1   49.10    4.90
  -2  -5   1   47.90    7.70
  -2  -5   1   48.10    5.10
   2  -5  -1   59.19    8.00
  -2  -5   1   25.60    7.50
   2  -5  -1   66.39    8.30
   2  -5  -1   39.00    7.00
  -2  -5   1   34.40    6.50
   2  -5  -1   49.90    8.10
  -2   5   1   55.29    8.80
  -2   5   1   43.80    7.00
   2   5  -1   49.30    7.00
  -2   5   1   34.60    7.10
  -2   5   1   60.59    8.70
  -2   5   1   43.20    4.70
   2   5  -1   40.90    7.80
   2   5  -1   56.89    8.80
   2   5  -1   48.20    7.20
   2   5  -1   51.79    7.80
   2   5  -1   45.70    8.60
  -2   5   1   41.50    7.50
  -2   5   1   25.00    8.50
   1  -5  -1   -0.20    5.90
  -1  -5   1    0.10    4.30
  -1  -5   1    3.50    3.40
   1  -5  -1   -3.70    4.90
  -1  -5   1   -9.20    5.00
   1  -5  -1    7.30    5.00
  -1  -5   1    2.00    4.50
  -1  -5   1    2.50    6.90
   1  -5  -1   -0.20    4.30
  -1  -5   1    4.40    5.30
   1  -5  -1   -0.70    3.30
  -1  -5   1    4.00    5.40
   1  -5  -1    1.50    4.50
   1  -5  -1    5.20    4.50
   1   5  -1    5.60    4.80
   1   5  -1    9.60    5.10
  -1   5   1    2.70    5.80
   1   5  -1   -1.30    4.70
   1   5  -1    4.60    4.60
  -1   5   1   -0.20    3.60
  -1   5   1   -0.70    4.30
  -1   5   1   -3.00    4.30
   1   5  -1   -2.90    5.90
   1   5  -1    5.50    4.60
  -1   5   1   -1.20    5.70
  -1   5   1    1.10    4.90
   0  -5  -1   58.59    8.40
   0  -5   1   46.40    5.30
   0  -5  -1   61.39    8.30
   0  -5  -1   64.19    8.80
   0  -5  -1   53.39    7.60
   0  -5   1   64.49    9.20
   0  -5  -1   52.79    7.70
   0  -5   1   47.80    8.50
   0  -5  -1   46.60    6.20
   0  -5   1   52.89    7.00
   0  -5   1   43.30    5.90
   0  -5  -1   45.50    7.10
   0  -5  -1   48.40    6.10
   0  -5   1   55.09    8.10
   0  -5   1   49.80    7.10
   0   5   1   60.89    7.50
   0   5   1   51.29    7.50
   0   5  -1   47.00    8.40
   0   5  -1   36.20    7.70
   0   5   1   52.59    7.90
   0   5   1   49.80    8.30
   0   5  -1   67.79    7.20
   0   5   1   44.00    5.80
   0   5  -1   51.29    8.80
   0   5   1   54.49    8.40
   0   5  -1   44.60    6.20
   0   5  -1   53.09    7.30
   1  -5   1   69.69    8.30
   1  -5   1   63.59    7.40
   1  -5   1   72.59    6.90
  -1  -5  -1   71.99    7.40
   1  -5   1   75.79    9.50
   1  -5   1   63.19    9.30
   1  -5   1   79.59    8.80
  -1  -5  -1   85.39    8.00
  -1  -5  -1   88.79   10.30
  -1  -5  -1   78.89    9.10
  -1  -5  -1   78.59    8.60
  -1  -5  -1   67.49    8.80
  -1   5  -1   83.49    9.80
  -1   5  -1   58.59    6.80
  -1   5  -1   62.09    7.90
   1   5   1   69.79    9.50
  -1   5  -1   55.79    6.40
  -1   5  -1   73.69    9.00
   1   5   1   71.89    7.00
   1   5   1   74.89    8.70
   1   5   1   73.69    9.40
  -1   5  -1   63.69    8.30
   1   5   1   69.49    7.30
   1   5   1   67.19    7.90
   1   5   1   65.59    8.80
   2  -5   1  599.34   23.30
  -2  -5  -1  629.04   23.90
  -2  -5  -1  592.44   25.00
   2  -5   1  588.44   25.50
  -2  -5  -1  499.55   25.50
   2  -5   1  649.54   24.60
  -2  -5  -1  603.74   26.20
   2  -5   1  621.04   26.00
  -2  -5  -1  607.04   24.40
   2  -5   1  575.74   25.50
   2  -5   1  581.34   24.90
  -2  -5  -1  645.54   25.40
  -2  -5  -1  587.94   22.70
  -2  -5  -1  611.74   24.90
   2   5   1  615.84   25.70
  -2   5  -1  609.54   25.20
  -2   5  -1  618.04   27.40
   2   5   1  604.24   25.10
  -2   5  -1  607.84   25.20
  -2   5  -1  646.74   23.00
   2   5   1  608.84   24.50
  -2   5  -1  598.44   22.10
  -2   5  -1  616.34   25.70
   2   5   1  637.64   22.70
   2   5   1  575.84   24.30
  -2   5  -1  616.64   24.60
   2   5   1  634.24   26.10
   2   5   1  577.64   23.60
   3  -5   1   56.29    8.10
   3  -5   1   46.30    8.00
  -3  -5  -1   54.39    8.80
   3  -5   1   62.29    8.00
  -3  -5  -1   66.29    9.60
  -3  -5  -1   47.80    8.80
  -3  -5  -1   64.69    9.00
   3  -5   1   44.70    7.90
   3  -5   1   64.79    9.70
   3  -5   1   51.69    7.10
  -3  -5  -1   55.69    8.70
  -3  -5  -1   48.50    9.70
  -3  -5  -1   58.79    7.80
  -3  -5  -1   51.79    7.40
  -3   5  -1   75.59    9.60
   3   5   1   36.70    8.70
   3   5   1   69.39    8.80
  -3   5  -1   36.60    5.60
  -3   5  -1   49.50    6.50
   3   5   1   54.59    8.50
   3   5   1   52.19    7.80
  -3   5  -1   40.00    7.60
  -3   5  -1   47.00    8.80
   3   5   1   39.10    8.40
   3   5   1   55.29    8.40
  -3   5  -1   39.00    9.00
   3   5   1   69.89    8.60
  -4  -5  -1   72.39    8.20
   4  -5   1   73.19    9.10
   4  -5   1   78.29   11.00
   4  -5   1   66.49   10.30
  -4  -5  -1   78.29   10.50
  -4  -5  -1   67.29   10.80
  -4  -5  -1   98.39   10.00
  -4  -5  -1   71.59   10.70
  -4  -5  -1   86.19   10.40
   4  -5   1   92.09   11.50
   4  -5   1   69.69    7.90
   4  -5   1   65.09    7.90
  -4  -5  -1   78.69    9.70
   4   5   1   78.19   10.10
   4   5   1   65.19   13.20
   4   5   1   66.59    9.60
  -4   5  -1   62.09    8.50
   4   5   1   85.19   10.30
   4   5   1   68.19    9.70
  -4   5  -1   75.79    7.90
  -4   5  -1   65.29   10.00
  -4   5  -1   75.89   10.00
  -4   5  -1   71.19    8.60
   4   5   1   88.69    8.60
  -4   5  -1   64.49   10.40
   4   5   1   65.59   10.30
   4   5   1   55.99    9.60
   5  -5   1  115.69   10.20
  -5  -5  -1  123.89   11.80
   5  -5   1  108.69   12.00
  -5  -5  -1  101.19   11.90
   5  -5   1  123.79   12.50
  -5  -5  -1  105.49   11.20
  -5  -5  -1  127.09   12.80
   5  -5   1  106.59   11.20
  -5  -5  -1  119.89   10.50
   5  -5   1  116.89   12.10
  -5  -5  -1  102.79   11.50
   5  -5   1  115.39   10.80
   5  -5   1  104.79    9.20
  -5  -5  -1  128.79   12.20
  -5   5  -1  113.89   10.10
  -5   5  -1  115.49    9.80
   5   5   1  120.29   13.10
   5   5   1  116.19   10.90
   5   5   1  100.59   12.40
   5   5   1  121.89   10.40
   5   5   1  122.19   11.80
   5   5   1  114.49   11.00
  -5   5  -1  122.79   10.90
  -5   5  -1  116.79   12.50
  -5   5  -1  104.59   10.70
  -5   5  -1  105.89    9.20
   5   5   1  112.89   10.10
   5   5   1  123.49   12.00
  -6  -5  -1 1768.32   61.89
   6  -5   1 1804.72   62.39
  -6  -5  -1 1799.62   59.79
  -6  -5  -1 1797.62   60.59
   6  -5   1 1761.52   61.49
  -6  -5  -1 1757.12   61.49
   6  -5   1 1716.13   60.39
   6  -5   1 1793.22   58.39
   6  -5   1 1742.03   62.29
  -6  -5  -1 1733.93   61.59
  -6  -5  -1 1775.52   61.89
  -6  -5  -1 1840.12   62.59
   6  -5   1 1760.22   58.89
   6  -5   1 1859.51   61.99
  -6   5  -1 1814.52   61.39
   6   5   1 1742.13   60.29
   6   5   1 1705.53   61.99
  -6   5  -1 1794.92   61.19
   6   5   1 1707.63   61.99
  -6   5  -1 1757.02   61.29
   6   5   1 1755.42   60.59
   6   5   1 1830.42   62.69
   6   5   1 1755.62   61.29
  -6   5  -1 1783.92   58.59
  -6   5  -1 1794.92   56.69
   6   5   1 1806.52   59.39
  -6   5  -1 1797.92   62.29
   7  -5   1   27.60    9.00
  -7  -5  -1   64.39   12.00
   7  -5   1   59.89   10.50
  -7  -5  -1   36.00    8.40
   7  -5   1   57.79    8.40
   7  -5   1   62.99   11.20
   7  -5   1   58.19   10.50
   7  -5   1   47.50    6.80
  -7  -5  -1   62.29   10.00
  -7  -5  -1   50.79    8.90
  -7  -5  -1   61.59    9.30
  -7  -5  -1   53.29    9.70
  -7  -5  -1   43.70   10.80
   7  -5   1   62.29    9.70
  -7   5  -1   42.40    7.10
   7   5   1   60.49    9.90
   7   5   1   35.10    8.50
  -7   5  -1   52.19    8.70
  -7   5  -1   53.09    9.80
  -7   5  -1   49.20    9.30
   7   5   1   39.10   10.80
   7   5   1   53.69   10.00
   7   5   1   51.29   10.60
   7   5   1   45.70    8.20
  -7   5  -1   46.40   10.40
  -7   5  -1   39.70    7.10
   7   5   1   41.60   10.00
  -8  -5  -1  -10.10    8.00
  -8  -5  -1   12.40    7.60
  -8  -5  -1   14.80    7.00
   8  -5   1    4.30    6.60
   8  -5   1    0.00    6.90
   8  -5   1   18.70    9.50
   8  -5   1    3.10    8.70
   8  -5   1   -0.40    8.90
   8  -5   1    5.70    4.80
  -8  -5  -1    6.40    6.70
  -8  -5  -1    7.20    7.70
  -8  -5  -1   12.90    8.70
   8  -5   1   13.10    7.50
   8   5   1   15.10    9.40
   8   5   1   15.10    7.00
  -8   5  -1   13.50    4.90
   8   5   1    7.70    7.40
  -8   5  -1   22.30    8.50
   8   5   1   15.00    7.50
   8   5   1   24.40    9.60
  -8   5  -1    2.20    5.40
   8   5   1    8.10    9.30
  -8   5  -1    7.70    8.60
   8   5   1    2.10    8.90
  -8   5  -1    7.80    8.00
  -8   5  -1    8.60    6.10
  -9  -5  -1  145.69   16.10
   9  -5   1  152.78   10.20
  -9  -5  -1  172.68   17.40
   9  -5   1  167.48   16.40
  -9  -5  -1  160.38   16.30
   9  -5   1  133.19   15.80
  -9  -5  -1  163.98   14.50
   9  -5   1  174.88   14.80
  -9  -5  -1   86.69   16.90
   9  -5   1  162.78   15.50
   9  -5   1  166.88   17.40
  -9  -5  -1  153.08   14.20
  -9  -5  -1  168.78   18.70
   9  -5   1  167.88   14.20
  -9   5  -1  177.28   17.00
   9   5   1  143.99   16.20
  -9   5  -1  156.18   17.60
   9   5   1  170.68   13.90
   9   5   1  175.08   16.40
  -9   5  -1  193.68   17.00
   9   5   1  189.38   14.80
  -9   5  -1  165.48   10.80
   9   5   1  156.78   15.80
   9   5   1  184.68   17.40
  -9   5  -1  175.98   17.90
   9   5   1  150.18   14.10
  10  -5   1 1472.25   48.40
  10  -5   1 1397.86   50.99
 -10  -5  -1 1394.66   54.19
 -10  -5  -1 1479.15   54.19
 -10  -5  -1 1426.66   51.49
  10  -5   1 1452.05   54.69
 -10  -5  -1 1440.96   54.49
 -10  -5  -1 1400.36   53.69
  10  -5   1 1411.56   53.69
  10  -5   1 1506.05   55.59
 -10  -5  -1 1469.15   52.79
  10  -5   1 1376.46   54.09
  10  -5   1 1375.06   53.09
 -10   5  -1 1397.76   53.49
 -10   5  -1 1351.76   52.59
  10   5   1 1424.56   54.89
 -10   5  -1 1405.46   53.99
  10   5   1 1385.76   51.19
 -10   5  -1 1369.46   47.10
  10   5   1 1437.06   54.29
  10   5   1 1469.15   52.29
  10   5   1 1431.06   54.79
 -10   5  -1 1326.77   53.09
  10   5   1 1488.35   54.59
  11  -5   1   20.20   11.70
 -11  -5  -1   16.80    9.50
 -11  -5  -1   -4.30    7.00
 -11  -5  -1   -0.40   10.80
 -11  -5  -1   22.60   10.60
  11  -5   1   17.90   11.70
 -11  -5  -1   16.00   12.90
  11  -5   1   13.00    8.60
  11  -5   1   11.10    9.20
  11   5   1   13.30   11.40
  11   5   1   -2.80    9.10
 -11   5  -1   13.40    9.40
  11   5   1   -7.00    7.90
 -11   5  -1   27.60   10.10
  11   5   1   24.70   11.60
 -11   5  -1   17.50    5.50
 -11   5  -1   -0.30    7.20
  11   5   1   26.40    8.50
 -11   5  -1   -0.70    5.90
  11   5   1   11.80    9.10
 -12  -5  -1  128.69   17.20
  12  -5   1  111.69   14.20
  12  -5   1  144.89   16.40
  12  -5   1  116.19   16.20
  12  -5   1  125.29   17.20
 -12  -5  -1  171.68   19.10
 -12  -5  -1  146.49   16.70
 -12  -5  -1  163.28   13.80
  12  -5   1  120.69   16.60
  12   5   1  148.49   18.50
  12   5   1  111.09   17.30
  12   5   1  108.59   15.80
 -12   5  -1  101.19   13.80
 -12   5  -1  142.09    9.50
 -12   5  -1  105.99   11.10
  12   5   1  117.49   15.00
 -12   5  -1  111.89   17.40
  12   5   1  168.08   18.30
  12   5   1  145.19   14.40
 -13  -5  -1   -6.20    7.70
 -13  -5  -1    2.10    9.90
  13  -5   1    3.60   12.50
 -13  -5  -1   13.70   11.40
  13  -5   1  -12.90   11.80
 -13  -5  -1   -0.10   13.10
  13  -5   1   -8.80    8.70
  13  -5   1   12.10   10.90
  13  -5   1  -16.50   11.80
 -13   5  -1    3.30    4.30
  13   5   1  -12.10   10.10
 -13   5  -1   -9.20    6.60
  13   5   1    4.00   12.10
 -13   5  -1    2.30   11.60
 -13   5  -1  -15.90   11.90
  13   5   1   -5.90    9.10
  13   5   1    1.30   10.10
 -14  -5  -1  349.67   27.60
  14  -5   1  300.37   25.40
  14  -5   1  356.16   24.50
  14  -5   1  293.57   22.30
  14  -5   1  370.96   27.10
 -14  -5  -1  380.76   26.10
  14   5   1  334.47   26.30
 -14   5  -1  350.66   20.30
  14   5   1  355.76   24.70
  14   5   1  416.46   28.00
 -14   5  -1  344.87   27.20
  14   5   1  318.37   23.30
  15  -5   1   58.69   16.10
 -15  -5  -1   46.40   16.90
 -15  -5  -1   62.29   11.50
  15  -5   1   31.40   13.10
 -15  -5  -1   56.89   15.70
  15  -5   1   25.30   15.60
  15  -5   1   69.89   17.50
 -15   5  -1   48.90   15.90
  15   5   1   51.49   16.30
  15   5   1   44.00   13.40
  15   5   1   44.90   15.80
  15   5   1   41.80   14.40
  16  -5   1   52.79   14.50
  16  -5   1   73.59   17.90
  16  -5   1   63.79   18.50
 -16  -5  -1   54.99   11.40
 -16  -5  -1   63.29   16.80
 -16  -5  -1  123.29   21.10
  16  -5   1   75.69   19.50
  16   5   1   64.29   15.90
  16   5   1   57.69   16.80
 -16   5  -1   76.19   16.50
  16   5   1   54.69   17.40
 -16   5  -1   72.69   11.90
  16   5   1   51.99   14.30
  17  -5   1   38.10   16.40
  17  -5   1    3.70   16.30
  17  -5   1   19.90   14.20
 -17  -5  -1   -4.60   15.80
 -17  -5  -1   38.70   16.00
 -17  -5  -1   23.20    9.60
 -17   5  -1   28.60   15.20
 -17   5  -1   27.30   11.40
  17   5   1   14.90   14.10
  17   5   1   23.60   13.80
  18  -5   1  206.48   27.00
  18  -5   1  141.69   22.10
 -18  -5  -1  156.28   23.50
 -18  -5  -1  149.88   24.00
  18  -5   1  169.58   21.00
 -18  -5  -1  168.58   16.20
  18  -5   1  162.98   25.00
  18   5   1  162.18   24.30
  18   5   1  173.68   24.70
  18   5   1  162.98   24.60
  18   5   1  144.49   20.90
 -18   5  -1  174.78   24.20
  19  -5   1  -19.30   16.00
 -19  -5  -1   19.90   16.00
 -19  -5  -1   17.90   16.50
 -19  -5  -1   17.70    9.30
  19  -5   1   -8.00   12.60
  19  -5   1  -18.20   16.40
  19  -5   1   16.40   14.90
  19   5   1   16.90   18.10
  19   5   1   16.30   18.30
  19   5   1   25.60   17.40
  19   5   1   17.30   16.20
 -19   5  -1   15.50   18.40
  20  -5   1   28.50   20.40
  20  -5   1  -33.90   16.70
 -20  -5  -1   -2.00   18.30
 -20  -5  -1   25.00   13.90
 -20  -5  -1    9.90   17.20
  20  -5   1    9.60   16.20
  20  -5   1   -4.80   17.40
  20   5   1  -23.80   17.60
 -20   5  -1  -20.20   17.80
  20   5   1   20.50   18.50
  20   5   1   16.10   18.80
  21  -5   1    3.90   16.40
  21  -5   1   -6.70   19.00
 -21  -5  -1    4.80   16.40
  21  -5   1   24.80   19.80
 -21  -5  -1  -19.00   16.90
  21  -5   1  -43.60   16.40
 -21   5  -1   -8.10   20.60
  21   5   1   17.70   18.10
  21   5   1    4.60   16.30
  21   5   1   14.30   18.70
  21   5   1   12.30   15.00
 -22  -5  -1  117.19   25.50
  22  -5   1  138.89   22.10
 -22  -5  -1   94.29   24.80
  22  -5   1   98.79   24.80
  22  -5   1  119.99   27.60
  22  -5   1  105.59   21.80
 -22   5  -1  116.89   27.00
  22   5   1  128.69   26.70
  22   5   1  165.88   29.00
  22   5   1   92.39   25.20
  22   5   1  147.29   23.20
  23  -5   1  -11.40   22.70
 -23  -5  -1   46.00   23.10
  23  -5   1   11.70   19.30
  23  -5   1   -5.00   20.60
 -23  -5  -1   18.40   21.80
  23  -5   1   43.60   24.30
  23   5   1   20.80   22.10
 -23   5  -1    8.90   22.20
  23   5   1   29.00   24.20
  23   5   1  -11.80   16.60
  23   5   1    4.40   21.20
  23  -6  -1   -1.10   18.40
  23  -6  -1  -13.30   20.40
  23  -6  -1   -9.60   21.40
 -23  -6   1  -34.10   19.10
  23   6  -1  -12.40   17.90
  23   6  -1    8.30   16.30
 -23   6   1  -39.30   18.00
  22  -6  -1   30.30   17.80
 -22  -6   1    4.00   18.00
  22  -6  -1    2.10   20.80
  22  -6  -1   38.00   23.40
  22  -6  -1   -5.60   18.70
 -22  -6   1   35.90   19.40
  22   6  -1   19.50   20.20
  22   6  -1   44.60   21.10
  22   6  -1   32.30   21.50
  22   6  -1   -0.80   17.20
  21  -6  -1  148.59   26.80
  21  -6  -1  135.09   26.10
  21  -6  -1  141.09   25.10
 -21  -6   1  149.19   23.70
 -21  -6   1  126.89   25.20
  21  -6  -1  142.99   23.40
  21   6  -1  151.98   26.40
  21   6  -1  138.39   26.00
 -21   6   1  105.89   22.80
  21   6  -1  149.59   25.90
  21   6  -1  140.59   23.80
  20  -6  -1   91.19   22.40
  20  -6  -1   96.29   23.30
  20  -6  -1  105.49   20.50
 -20  -6   1  119.79   23.00
  20  -6  -1   91.49   22.80
 -20  -6   1  104.59   21.30
  20   6  -1   72.69   19.90
  20   6  -1  108.79   23.40
 -20   6   1  102.49   22.60
  20   6  -1  127.19   23.90
  20   6  -1  153.88   25.40
 -19  -6   1   20.80   13.10
  19  -6  -1   18.90   17.10
  19  -6  -1   40.30   19.70
 -19  -6   1   35.50   16.60
  19  -6  -1   32.20   18.20
 -19  -6   1   55.59   19.80
  19   6  -1   40.20   19.40
  19   6  -1   49.99   19.40
 -19   6   1   17.50    9.40
  19   6  -1   51.79   19.50
 -19   6   1   30.90   18.40
 -18  -6   1   41.20   16.70
 -18  -6   1   37.00   17.80
  18  -6  -1  -11.60   16.30
 -18  -6   1   33.50   10.40
  18  -6  -1   31.50   17.70
  18  -6  -1   15.80   14.40
  18  -6  -1    7.00   16.30
  18   6  -1   15.80   16.70
  18   6  -1   20.80   17.30
  18   6  -1  -21.20   13.50
  18   6  -1   29.40   15.50
 -18   6   1   -6.50   13.60
 -18   6   1   30.10   10.20
  17  -6  -1  832.82   44.60
  17  -6  -1  865.01   45.90
  17  -6  -1  880.91   46.30
  17  -6  -1  863.51   42.90
 -17  -6   1  962.50   46.30
 -17  -6   1  882.61   42.90
 -17  -6   1  890.21   37.90
 -17   6   1  844.82   45.20
  17   6  -1  809.32   44.40
 -17   6   1  822.92   35.20
  17   6  -1  893.71   44.60
  17   6  -1  911.01   45.80
  16  -6  -1    3.10   14.50
  16  -6  -1   20.00   15.70
 -16  -6   1    6.60    8.40
  16  -6  -1   -4.80   12.70
 -16  -6   1    9.30   15.50
 -16  -6   1   -3.30   12.30
  16  -6  -1    2.20   12.70
  16   6  -1   27.70   15.50
  16   6  -1    0.60    9.60
  16   6  -1   20.70   15.60
  16   6  -1   45.50   16.40
 -16   6   1    1.10    7.70
 -16   6   1   16.60   15.00
 -15  -6   1  407.26   28.90
  15  -6  -1  393.16   26.20
 -15  -6   1  378.76   26.00
  15  -6  -1  367.96   29.20
 -15  -6   1  380.46   23.20
  15  -6  -1  426.76   30.30
  15  -6  -1  339.07   28.20
  15  -6  -1  346.37   27.60
  15   6  -1  383.46   22.70
 -15   6   1  390.96   19.90
 -15   6   1  384.26   28.70
  15   6  -1  434.86   29.90
  15   6  -1  395.36   28.70
  15   6  -1  425.96   29.70
 -14  -6   1  240.88   18.20
  14  -6  -1  270.27   24.30
  14  -6  -1  243.88   22.50
 -14  -6   1  265.47   24.90
  14  -6  -1  207.78   20.60
  14  -6  -1  229.58   23.20
 -14  -6   1  266.57   21.30
  14  -6  -1  290.17   25.40
 -14   6   1  266.57   24.70
  14   6  -1  267.37   19.80
  14   6  -1  258.17   24.30
  14   6  -1  292.67   22.00
  14   6  -1  218.48   22.60
 -14   6   1  247.28   15.20
  14   6  -1  242.18   23.50
  13  -6  -1  674.93   33.00
  13  -6  -1  718.23   36.20
  13  -6  -1  680.43   34.10
 -13  -6   1  697.03   36.10
 -13  -6   1  723.73   33.00
 -13  -6   1  709.73   31.60
  13  -6  -1  645.34   36.30
  13  -6  -1  671.93   24.30
  13  -6  -1  695.73   36.30
  13   6  -1  727.63   36.50
  13   6  -1  667.03   34.00
  13   6  -1  656.63   32.10
 -13   6   1  713.53   36.00
  13   6  -1  725.33   36.50
  13   6  -1  706.83   31.40
 -13   6   1  688.03   24.70
  13   6  -1  714.33   36.30
  12  -6  -1  485.45   26.40
  12  -6  -1  494.35   29.10
 -12  -6   1  469.75   27.10
  12  -6  -1  492.55   29.80
  12  -6  -1  453.45   29.20
 -12  -6   1  498.15   27.70
 -12  -6   1  501.15   25.60
 -12  -6   1  487.45   24.90
 -12  -6   1  471.75   26.30
  12  -6  -1  498.75   29.00
  12   6  -1  462.95   28.40
  12   6  -1  499.45   28.80
 -12   6   1  488.75   28.20
  12   6  -1  501.65   27.20
 -12   6   1  447.36   21.70
 -12   6   1  482.35   25.90
 -12   6   1  486.75   19.30
  12   6  -1  510.95   28.40
 -12   6   1  470.55   26.80
 -11  -6   1  355.16   23.60
 -11  -6   1  357.16   20.40
  11  -6  -1  355.36   23.80
 -11  -6   1  315.77   21.10
 -11  -6   1  310.07   21.60
  11  -6  -1  334.67   22.40
 -11  -6   1  374.46   23.10
  11  -6  -1  301.57   20.60
  11  -6  -1  330.37   23.40
  11  -6  -1  347.87   21.80
  11  -6  -1  330.57   15.40
 -11  -6   1  353.66   24.10
 -11   6   1  328.27   20.70
 -11   6   1  338.57   22.00
  11   6  -1  335.37   20.00
 -11   6   1  359.86   16.10
  11   6  -1  378.36   23.40
 -11   6   1  301.87   22.80
  11   6  -1  359.56   23.80
  11   6  -1  396.36   24.40
  11   6  -1  353.66   20.70
  11   6  -1  348.17   21.80
  10  -6  -1  218.18   17.00
  10  -6  -1  192.88   17.00
 -10  -6   1  215.68   17.20
 -10  -6   1  214.18   19.40
  10  -6  -1  223.28   19.40
 -10  -6   1  236.28   21.20
  10  -6  -1  249.88   16.80
  10  -6  -1  224.28   12.70
 -10  -6   1  223.98   16.60
  10  -6  -1  274.47   19.20
 -10  -6   1  231.68   17.30
  10  -6  -1  190.68   16.30
  10   6  -1  245.98   17.90
 -10   6   1  244.18   19.80
 -10   6   1  216.18   17.30
  10   6  -1  228.58   17.40
  10   6  -1  237.58   17.00
 -10   6   1  231.18   13.10
 -10   6   1  213.28   11.30
 -10   6   1  248.08   18.90
 -10   6   1  235.98   19.10
  10   6  -1  236.18   17.80
  10   6  -1  233.18   19.60
  10   6  -1  219.68   18.90
  10   6  -1  225.18   15.60
   9  -6  -1   93.19   12.10
   9  -6  -1  122.09   13.00
   9  -6  -1   89.89   13.80
   9  -6  -1   80.29   12.70
   9  -6  -1  102.59    9.30
  -9  -6   1  105.69   14.40
  -9  -6   1   92.49   12.00
  -9  -6   1   91.89   12.90
  -9  -6   1  118.79   12.10
  -9  -6   1  108.79   13.10
  -9  -6   1   93.99   14.50
   9  -6  -1   84.99   12.20
  -9  -6   1   84.49   13.60
   9  -6  -1   86.69   14.30
  -9   6   1  103.79   12.00
   9   6  -1  104.99   12.50
   9   6  -1  109.69   13.60
   9   6  -1  109.99   14.20
   9   6  -1  122.49   15.40
  -9   6   1   97.29    9.50
  -9   6   1  101.69    7.20
  -9   6   1   95.29   14.00
  -9   6   1  102.39   12.80
   9   6  -1   96.99   11.00
  -9   6   1  115.79   14.10
   9   6  -1  106.09   13.90
   9   6  -1  117.59   13.70
   8  -6  -1   -3.40    6.40
   8  -6  -1    5.60    6.90
   8  -6  -1   10.10    7.30
  -8  -6   1   10.10    6.50
  -8  -6   1    0.10    6.40
   8  -6  -1  -13.60   10.60
   8  -6  -1    0.50    6.80
   8  -6  -1    9.90    5.70
  -8  -6   1    8.60    7.40
  -8  -6   1   -1.80    7.20
  -8  -6   1   -3.10    5.60
  -8  -6   1   -2.90    7.00
   8  -6  -1    2.50    7.30
   8   6  -1    7.20    6.00
   8   6  -1    1.30    8.90
   8   6  -1    3.70   10.50
   8   6  -1    2.00    7.50
   8   6  -1   -0.90    6.90
   8   6  -1    0.70    6.80
   8   6  -1    4.70    9.00
  -8   6   1    9.40    3.50
  -8   6   1   12.90    9.80
  -8   6   1    8.60    6.00
  -8   6   1    0.20    7.90
  -8   6   1    0.00    7.90
  -8   6   1    7.80    7.40
   8   6  -1    3.10    8.30
  -7  -6   1  159.28   14.80
  -7  -6   1  154.18   11.70
   7  -6  -1  122.89   10.40
   7  -6  -1  138.39   13.30
  -7  -6   1  149.19   13.20
   7  -6  -1  136.79   14.50
   7  -6  -1  134.39   14.70
  -7  -6   1  155.28   15.60
  -7  -6   1  130.79   13.10
   7  -6  -1  166.08   14.00
   7  -6  -1  105.29   14.30
   7  -6  -1  152.58   12.80
  -7  -6   1  134.29   13.90
  -7  -6   1  122.29   13.90
   7   6  -1  118.79   12.90
   7   6  -1  152.08   14.40
   7   6  -1  132.29   13.60
   7   6  -1  131.09   10.40
   7   6  -1  163.08   15.70
  -7   6   1  132.39   13.70
  -7   6   1  135.19   14.30
   7   6  -1  131.59   14.40
   7   6  -1  141.59   14.50
  -7   6   1  141.49    7.20
  -7   6   1  149.19   14.10
   7   6  -1  127.69   14.60
  -7   6   1  158.98   15.00
  -7   6   1  130.39   11.50
   6  -6  -1  127.79   13.70
   6  -6  -1  120.79   10.90
  -6  -6   1  158.68   14.60
  -6  -6   1  139.89   13.50
   6  -6  -1  141.39   13.20
  -6  -6   1  159.68   15.50
   6  -6  -1  145.99   12.50
  -6  -6   1  138.99   11.90
  -6  -6   1  140.59   13.40
   6  -6  -1  114.29   11.80
   6  -6  -1  142.99   14.50
  -6  -6   1  139.59   13.60
  -6  -6   1  131.29   10.50
   6   6  -1  114.59   13.20
   6   6  -1  146.49   14.80
  -6   6   1  166.38   15.00
  -6   6   1  118.79   12.90
   6   6  -1  150.38   13.90
   6   6  -1  130.19   11.60
   6   6  -1  138.19   14.50
  -6   6   1  135.19   11.20
  -6   6   1  122.99    6.70
  -6   6   1  130.69    7.60
   6   6  -1  142.39   14.50
   6   6  -1  141.39    9.80
   6   6  -1  158.78   13.70
  -6   6   1  135.99   13.10
  -6   6   1  120.89   12.20
  -6   6   1  122.59   10.60
  -5  -6   1  746.23   29.10
  -5  -6   1  708.13   25.90
   5  -6  -1  675.43   30.80
   5  -6  -1  669.23   30.00
   5  -6  -1  692.73   30.60
   5  -6  -1  734.43   27.60
   5  -6  -1  680.33   28.20
  -5  -6   1  709.43   29.80
  -5  -6   1  680.03   30.50
   5  -6  -1  678.13   29.40
  -5  -6   1  713.43   29.70
  -5  -6   1  740.83   30.20
  -5  -6   1  654.03   28.90
   5   6  -1  714.73   29.10
   5   6  -1  670.03   30.30
  -5   6   1  702.93   27.80
  -5   6   1  679.63   29.20
  -5   6   1  736.23   29.40
  -5   6   1  698.63   27.70
   5   6  -1  702.83   29.80
   5   6  -1  669.13   28.80
   5   6  -1  687.83   27.00
  -5   6   1  703.03   28.80
   5   6  -1  691.13   30.40
   5   6  -1  711.43   29.70
   5   6  -1  670.23   30.30
  -4  -6   1    9.10    6.70
  -4  -6   1   19.60    6.50
   4  -6  -1   20.80    6.60
  -4  -6   1   16.30    8.30
  -4  -6   1   11.70    8.60
   4  -6  -1    9.50    5.80
   4  -6  -1   18.10    7.50
   4  -6  -1    0.60    7.80
   4  -6  -1    7.60    7.40
  -4  -6   1    1.40    6.90
   4  -6  -1   15.30    8.90
  -4  -6   1   16.10    5.20
  -4  -6   1    9.60    6.00
  -4   6   1   15.10    6.80
  -4   6   1    8.50    8.10
  -4   6   1   14.00    3.70
   4   6  -1   22.10    8.50
  -4   6   1   15.70    7.40
   4   6  -1   11.10    4.40
  -4   6   1    9.10    6.00
   4   6  -1   11.30    7.50
  -4   6   1    9.60    7.40
   4   6  -1    5.40    7.60
   4   6  -1   17.40    7.50
   4   6  -1   13.60    8.60
   4   6  -1   17.80    6.10
  -4   6   1    7.40    7.50
   4   6  -1    9.40    6.80
  -3  -6   1 3808.62  122.69
   3  -6  -1 3742.83  122.29
   3  -6  -1 3780.92  121.99
  -3  -6   1 3774.92  120.49
   3  -6  -1 3839.72  121.59
  -3  -6   1 3819.12  121.69
  -3  -6   1 3709.13  121.59
  -3  -6   1 3788.62  121.79
  -3  -6   1 3750.32  117.19
   3  -6  -1 3806.52  120.49
   3  -6  -1 3843.42  120.29
  -3  -6   1 3891.71  122.19
  -3  -6   1 3862.01  120.89
   3   6  -1 3930.91  122.59
  -3   6   1 3902.01  121.69
  -3   6   1 3941.31  122.09
  -3   6   1 3807.32  120.49
  -3   6   1 3786.72  121.99
   3   6  -1 3755.52  121.59
  -3   6   1 3911.91  121.69
   3   6  -1 3842.72  117.19
   3   6  -1 3862.81  120.39
  -3   6   1 3711.23  116.39
  -3   6   1 3931.21  122.19
   3   6  -1 3812.72  121.49
   3   6  -1 3841.22  122.39
  -3   6   1 3803.22  119.69
   3   6  -1 3813.02  121.99
  -3   6   1 3722.23  121.69
   3   6  -1 3829.52  120.69
   2  -6  -1  573.74   24.30
  -2  -6   1  560.14   23.50
   2  -6  -1  604.14   24.80
  -2  -6   1  574.74   24.70
   2  -6  -1  628.84   24.80
  -2  -6   1  524.35   24.60
  -2  -6   1  581.04   24.50
  -2  -6   1  570.44   26.50
   2  -6  -1  573.34   25.10
   2  -6  -1  549.15   20.80
  -2  -6   1  540.55   20.90
   2  -6  -1  575.14   25.40
   2   6  -1  567.44   25.50
   2   6  -1  546.55   24.80
  -2   6   1  604.04   25.20
  -2   6   1  581.54   25.20
   2   6  -1  558.34   23.70
  -2   6   1  574.84   23.60
  -2   6   1  570.14   25.00
  -2   6   1  550.74   24.50
   2   6  -1  543.55   25.10
   2   6  -1  565.34   24.00
   2   6  -1  598.64   26.10
  -2   6   1  564.34   25.30
  -2   6   1  558.04   20.90
  -2   6   1  577.84   25.70
   2   6  -1  564.14   25.00
   1  -6  -1   25.80    7.90
  -1  -6   1   28.60    6.90
  -1  -6   1   30.30    7.80
   1  -6  -1   16.30    5.90
   1  -6  -1   18.90    8.70
  -1  -6   1   25.60    6.30
  -1  -6   1   18.50    5.00
   1  -6  -1   15.70    7.20
   1  -6  -1   12.70    8.30
   1  -6  -1   15.50    6.00
  -1  -6   1   32.40    9.10
   1  -6  -1   21.60    5.20
  -1  -6   1   17.80    9.00
  -1  -6   1    9.10    6.90
   1   6  -1   16.30    6.50
  -1   6   1    4.60    6.80
   1   6  -1   14.20    6.10
  -1   6   1   17.60    7.20
  -1   6   1   15.30    6.00
  -1   6   1   24.80    8.60
  -1   6   1   16.40    5.00
   1   6  -1   25.10    7.90
  -1   6   1   26.70    7.60
   1   6  -1   19.10    7.90
  -1   6   1   25.00    6.10
   1   6  -1   15.60    6.30
  -1   6   1   18.10    8.40
   1   6  -1   22.20    7.00
   1   6  -1   23.50    8.20
   0  -6  -1  164.98   10.80
   0  -6  -1  151.78   10.10
   0  -6   1  160.98   10.90
   0  -6   1  178.18   12.40
   0  -6  -1  197.88   14.20
   0  -6  -1  167.48   12.00
   0  -6   1  160.28    9.90
   0  -6  -1  174.18   14.20
   0  -6  -1  179.38   13.50
   0  -6   1  160.48   12.80
   0  -6   1  164.08   14.60
   0  -6  -1  174.58   13.10
   0  -6  -1  169.78   14.70
   0  -6   1  184.58   15.00
   0  -6   1  193.68   13.70
   0   6   1  157.68   14.00
   0   6  -1  157.98   11.80
   0   6  -1  174.78   11.50
   0   6  -1  166.88   13.70
   0   6   1  182.48   12.40
   0   6   1  174.08   13.60
   0   6  -1  154.88   14.10
   0   6  -1  186.38   13.80
   0   6   1  194.38   13.70
   0   6   1  163.48   11.00
   0   6  -1  155.18   13.80
   0   6   1  163.38   12.30
   0   6   1  163.38   11.90
   0   6  -1  162.28   12.10
   0   6   1  170.18   13.90
  -1  -6  -1 1421.96   49.80
  -1  -6  -1 1395.96   50.19
   1  -6   1 1412.46   50.29
  -1  -6  -1 1485.05   50.39
   1  -6   1 1433.16   48.50
   1  -6   1 1390.46   49.60
   1  -6   1 1452.85   47.40
  -1  -6  -1 1394.86   47.80
  -1  -6  -1 1423.36   47.60
   1  -6   1 1425.66   50.49
   1  -6   1 1445.36   51.49
  -1  -6  -1 1420.76   50.29
  -1  -6  -1 1408.56   51.29
  -1   6  -1 1405.26   50.29
  -1   6  -1 1355.36   50.59
  -1   6  -1 1472.55   50.29
   1   6   1 1403.36   50.19
   1   6   1 1444.26   49.20
  -1   6  -1 1387.56   47.20
   1   6   1 1469.35   49.99
  -1   6  -1 1376.56   50.79
   1   6   1 1403.86   50.69
   1   6   1 1398.16   50.79
   1   6   1 1403.96   50.79
   1   6   1 1432.46   47.90
  -1   6  -1 1376.86   47.70
  -1   6  -1 1461.55   50.69
  -2  -6  -1    5.30    8.30
  -2  -6  -1    9.90    7.80
  -2  -6  -1   12.70    6.30
   2  -6   1   16.00    8.00
   2  -6   1   16.10    7.50
  -2  -6  -1   20.20    6.40
   2  -6   1    6.50    6.40
  -2  -6  -1   12.70    8.30
   2  -6   1   11.20    6.50
  -2  -6  -1   12.80    8.10
   2  -6   1   14.10    6.50
  -2  -6  -1    2.80    5.50
   2  -6   1    5.10    7.20
   2   6   1   10.90    5.40
  -2   6  -1   28.30    8.40
   2   6   1   12.10    7.10
  -2   6  -1   14.00    5.30
  -2   6  -1   15.30    7.90
   2   6   1   18.40    6.80
   2   6   1    5.50    7.40
   2   6   1   17.70    8.30
  -2   6  -1    8.90    7.20
  -2   6  -1   18.20    6.50
   2   6   1   13.00    6.70
  -2   6  -1   12.50    5.60
   2   6   1    8.10    6.10
   2   6   1    9.20    7.40
  -3  -6  -1  226.38   13.30
   3  -6   1  218.08   13.90
   3  -6   1  216.98   16.80
   3  -6   1  216.68   16.30
  -3  -6  -1  239.68   16.00
  -3  -6  -1  210.78   13.70
   3  -6   1  236.98   13.60
  -3  -6  -1  225.28   15.00
   3  -6   1  238.68   15.70
   3  -6   1  229.98   16.50
  -3  -6  -1  242.98   17.00
  -3  -6  -1  225.38   15.80
  -3  -6  -1  211.18   15.30
  -3  -6  -1  190.98   14.60
  -3   6  -1  231.78   15.60
   3   6   1  213.68   15.90
   3   6   1  196.98   12.30
  -3   6  -1  218.48   11.70
   3   6   1  219.08   14.70
   3   6   1  229.68   16.60
   3   6   1  214.78   14.00
  -3   6  -1  215.78   14.50
  -3   6  -1  223.68   16.10
  -3   6  -1  226.28   15.00
  -3   6  -1  236.08   14.40
   3   6   1  209.68   15.80
  -3   6  -1  222.18   13.10
   3   6   1  213.88   15.40
   3   6   1  209.68   14.80
  -4  -6  -1  457.35   21.90
   4  -6   1  467.85   20.90
   4  -6   1  450.25   20.20
  -4  -6  -1  447.36   20.30
  -4  -6  -1  459.85   22.60
  -4  -6  -1  471.95   24.10
   4  -6   1  458.25   22.70
   4  -6   1  453.55   23.30
  -4  -6  -1  490.35   22.70
  -4  -6  -1  440.46   21.30
   4  -6   1  454.15   22.70
  -4  -6  -1  495.05   22.50
   4  -6   1  433.16   22.00
   4  -6   1  469.35   20.50
  -4   6  -1  448.46   19.60
  -4   6  -1  489.45   22.30
   4   6   1  455.05   22.30
   4   6   1  465.85   19.90
  -4   6  -1  476.25   22.70
  -4   6  -1  455.25   18.20
   4   6   1  443.86   23.30
   4   6   1  456.15   22.40
   4   6   1  436.16   22.50
  -4   6  -1  467.35   21.80
   4   6   1  453.65   21.80
   4   6   1  470.05   22.00
   4   6   1  451.25   21.10
  -4   6  -1  462.55   23.30
  -4   6  -1  471.75   21.80
  -5  -6  -1  594.84   26.90
   5  -6   1  570.64   27.90
   5  -6   1  535.75   24.20
   5  -6   1  607.54   24.80
   5  -6   1  577.74   26.80
  -5  -6  -1  597.74   27.30
  -5  -6  -1  651.43   27.10
  -5  -6  -1  642.44   28.10
  -5  -6  -1  596.94   28.50
   5  -6   1  597.44   25.30
  -5  -6  -1  592.14   27.60
   5  -6   1  599.94   27.10
  -5  -6  -1  638.54   25.40
   5  -6   1  605.54   27.40
   5   6   1  624.64   28.50
   5   6   1  586.14   24.00
   5   6   1  615.34   26.80
   5   6   1  627.24   27.30
   5   6   1  602.14   26.00
  -5   6  -1  601.54   26.40
  -5   6  -1  600.24   26.30
  -5   6  -1  601.74   22.50
   5   6   1  596.04   27.10
  -5   6  -1  577.94   26.90
   5   6   1  618.84   28.30
  -5   6  -1  588.14   24.00
  -5   6  -1  562.24   26.10
   5   6   1  593.54   26.10
  -5   6  -1  644.04   25.60
  -6  -6  -1   68.49    9.10
  -6  -6  -1   61.39   11.70
  -6  -6  -1   62.09   10.80
  -6  -6  -1   59.69   11.30
   6  -6   1   57.99    9.00
   6  -6   1   66.09    8.80
   6  -6   1   77.69   12.80
  -6  -6  -1   73.69   10.50
   6  -6   1   47.30    8.30
   6  -6   1   66.79   10.30
   6  -6   1   92.99   11.90
  -6  -6  -1   91.89   11.80
   6  -6   1   60.79   10.10
  -6  -6  -1   80.99   11.20
   6   6   1   75.79   11.20
   6   6   1   68.49    9.70
  -6   6  -1   71.19    6.70
   6   6   1   57.79   10.30
   6   6   1   67.59   11.80
   6   6   1   59.19    9.80
   6   6   1   66.99   11.20
  -6   6  -1   51.29    9.90
  -6   6  -1   73.79    9.90
   6   6   1   68.69    9.20
  -6   6  -1   66.19    9.10
   6   6   1   54.39   11.10
  -6   6  -1   70.29   11.70
  -6   6  -1   55.29   10.80
   7  -6   1   63.39   12.30
  -7  -6  -1   44.90   11.90
   7  -6   1   45.90   11.40
   7  -6   1   43.50    9.40
  -7  -6  -1   47.10    9.90
   7  -6   1   53.09    8.00
   7  -6   1   67.19   13.70
   7  -6   1   44.20   10.70
  -7  -6  -1   45.80   10.60
  -7  -6  -1   58.29   11.40
  -7  -6  -1   54.49    9.30
   7  -6   1   52.89    9.10
  -7   6  -1   57.99   10.70
   7   6   1   64.49   12.10
   7   6   1   55.99   10.40
   7   6   1   81.99   13.00
  -7   6  -1   53.79    8.90
  -7   6  -1   51.19   11.80
   7   6   1   51.89   10.70
   7   6   1   58.99    8.80
   7   6   1   68.99   10.90
  -7   6  -1   57.79   10.70
   7   6   1   41.60    9.60
   8  -6   1   22.70    9.10
   8  -6   1   30.00   11.60
  -8  -6  -1   21.40    8.50
  -8  -6  -1   15.60   10.50
  -8  -6  -1   18.20    7.80
   8  -6   1   26.90    6.70
   8  -6   1    7.80    8.00
   8  -6   1   12.60    8.10
  -8  -6  -1   15.50    8.30
  -8  -6  -1   21.10    8.10
  -8  -6  -1   25.30    9.50
  -8  -6  -1   27.90    9.30
   8  -6   1    6.30    9.10
   8  -6   1   13.90   10.20
   8   6   1   20.70    7.50
   8   6   1   20.70    9.70
  -8   6  -1   28.20    7.30
   8   6   1   31.50   10.40
   8   6   1   17.30    8.70
  -8   6  -1   21.00    9.70
  -8   6  -1   23.60    5.50
   8   6   1   -0.40    7.30
  -8   6  -1   22.90    7.50
  -8   6  -1   10.70   10.10
   8   6   1   21.70   10.90
   8   6   1   12.10    9.30
  -8   6  -1   16.00    8.90
  -9  -6  -1   19.80    9.40
   9  -6   1    4.20    7.60
  -9  -6  -1    4.00    6.30
   9  -6   1    2.00    7.20
   9  -6   1  -11.60    9.70
  -9  -6  -1   -2.30    6.90
  -9  -6  -1   -2.50    9.60
   9  -6   1    2.60   10.40
  -9  -6  -1    5.80    7.90
  -9  -6  -1   -1.90    7.90
   9  -6   1   -0.40    6.40
  -9  -6  -1   12.20    8.80
   9  -6   1   -0.70    9.90
   9  -6   1   -3.40    5.10
  -9   6  -1    2.60    5.70
   9   6   1   12.20   10.60
   9   6   1   15.50   10.00
  -9   6  -1    1.80    8.70
   9   6   1   -7.30    6.90
  -9   6  -1   -8.50    7.30
   9   6   1   19.50   10.80
   9   6   1    0.00    7.30
   9   6   1   11.20    8.60
  -9   6  -1    7.40    6.60
  -9   6  -1    4.70    8.70
   9   6   1    6.70   10.80
  -9   6  -1  -12.90    6.90
  10  -6   1  444.86   22.50
  10  -6   1  420.96   26.60
 -10  -6  -1  370.16   25.50
  10  -6   1  446.86   23.30
 -10  -6  -1  429.86   30.10
  10  -6   1  387.36   18.40
 -10  -6  -1  430.66   24.70
  10  -6   1  437.86   26.40
 -10  -6  -1  395.06   23.80
  10  -6   1  392.96   23.10
  10  -6   1  450.35   26.70
 -10  -6  -1  418.36   23.90
 -10  -6  -1  430.86   24.50
  10   6   1  392.16   24.60
  10   6   1  423.06   23.00
 -10   6  -1  415.66   19.30
 -10   6  -1  420.06   24.50
  10   6   1  436.66   23.40
  10   6   1  457.35   26.60
  10   6   1  415.86   26.30
 -10   6  -1  464.25   30.60
  10   6   1  413.56   25.60
  10   6   1  376.06   24.90
 -10   6  -1  411.06   24.70
 -10   6  -1  445.36   24.50
 -11  -6  -1  145.99   18.60
 -11  -6  -1  142.79   18.10
  11  -6   1  133.59   18.00
 -11  -6  -1  122.89   15.70
  11  -6   1  137.89   16.70
 -11  -6  -1  130.19   15.80
 -11  -6  -1  116.99   14.60
  11  -6   1  142.39   10.40
  11  -6   1  162.68   19.20
  11  -6   1  130.49   16.50
  11  -6   1  135.09   16.30
  11   6   1  131.19   16.30
  11   6   1  162.58   19.00
 -11   6  -1  128.39   11.30
  11   6   1  145.59   15.60
  11   6   1  121.29   14.50
  11   6   1  118.99   16.60
 -11   6  -1  150.08   19.10
  11   6   1  137.09   15.10
 -11   6  -1  121.79   11.00
  11   6   1  139.39   17.70
 -11   6  -1  143.49   15.60
  12  -6   1  354.26   16.30
  12  -6   1  340.97   26.10
 -12  -6  -1  373.96   26.60
  12  -6   1  386.76   22.60
  12  -6   1  365.06   26.50
  12  -6   1  335.97   23.80
 -12  -6  -1  392.36   24.00
  12  -6   1  357.96   26.20
 -12  -6  -1  345.87   23.00
 -12  -6  -1  365.46   26.70
 -12  -6  -1  403.86   22.70
 -12   6  -1  356.36   23.70
  12   6   1  372.06   23.90
 -12   6  -1  361.66   17.00
  12   6   1  341.57   25.00
 -12   6  -1  344.57   26.30
  12   6   1  333.57   21.80
  12   6   1  321.87   21.30
  12   6   1  340.17   26.10
 -12   6  -1  385.76   18.70
  12   6   1  337.07   23.40
  13  -6   1  235.98   19.70
 -13  -6  -1  242.48   24.60
  13  -6   1  262.57   24.30
  13  -6   1  275.67   24.70
  13  -6   1  295.77   25.00
 -13  -6  -1  214.88   18.50
 -13  -6  -1  232.38   21.60
  13   6   1  249.58   23.80
  13   6   1  276.27   20.30
 -13   6  -1  231.18   15.50
 -13   6  -1  261.77   13.60
  13   6   1  258.17   21.10
 -13   6  -1  271.37   24.50
  13   6   1  205.08   22.30
  14  -6   1   -0.50   10.10
  14  -6   1   -8.90   13.20
 -14  -6  -1   15.50   12.50
 -14  -6  -1    6.80   14.30
 -14  -6  -1   -1.60    8.00
  14  -6   1   -3.90   13.00
  14  -6   1    0.80   10.90
  14   6   1  -23.50   13.30
  14   6   1    6.20   13.90
 -14   6  -1    5.90    4.70
 -14   6  -1    1.60    7.60
  14   6   1    0.50   13.00
 -14   6  -1  -17.00   13.60
  15  -6   1  980.10   48.90
 -15  -6  -1  986.90   42.90
  15  -6   1 1072.29   49.70
  15  -6   1 1183.18   51.79
 -15  -6  -1 1052.99   49.70
  15  -6   1 1006.00   45.40
 -15  -6  -1 1042.70   47.00
  15   6   1 1021.80   49.30
  15   6   1 1055.29   50.09
 -15   6  -1 1082.19   41.20
 -15   6  -1 1066.59   49.40
  15   6   1 1073.79   49.30
  16  -6   1   -3.80   14.50
  16  -6   1   -0.30   12.60
  16  -6   1    3.50   15.90
 -16  -6  -1   -9.90   12.60
 -16  -6  -1  -10.40   13.60
  16  -6   1   -8.90   14.60
  16   6   1   -9.70   14.00
  16   6   1   11.50   16.20
  16   6   1   13.70   12.30
  16   6   1    1.30   12.50
 -16   6  -1  -16.50    7.20
 -16   6  -1   10.70   15.60
  17  -6   1  -10.90   14.90
  17  -6   1   -9.50   15.50
 -17  -6  -1    3.70   15.20
  17  -6   1  -10.40   12.70
 -17  -6  -1   -7.20   14.20
  17  -6   1  -14.90   15.00
 -17   6  -1   -2.20    8.80
  17   6   1   -4.90   15.30
  17   6   1   -4.50   12.50
  17   6   1  -24.30   13.40
  17   6   1   25.10   17.50
 -17   6  -1    0.30   15.60
  18  -6   1   63.29   19.00
  18  -6   1   61.69   16.00
  18  -6   1  100.49   21.70
 -18  -6  -1   86.29   19.80
 -18  -6  -1   50.59   19.50
  18  -6   1  102.19   22.00
 -18   6  -1   87.29   22.00
  18   6   1  128.69   23.10
  18   6   1   99.09   21.80
  18   6   1  117.29   21.00
  18   6   1   80.69   19.90
 -19  -6  -1  712.43   42.00
  19  -6   1  605.14   42.30
  19  -6   1  742.93   43.90
  19  -6   1  693.23   43.40
 -19  -6  -1  750.82   44.70
  19   6   1  714.13   40.90
  19   6   1  698.23   43.70
  19   6   1  643.24   43.00
 -19   6  -1  649.83   42.80
  20  -6   1   42.30   19.80
 -20  -6  -1   63.99   19.50
 -20  -6  -1   64.99   25.90
  20  -6   1   17.60   19.60
  20  -6   1   28.20   15.90
  20  -6   1   23.70   19.30
  20   6   1   41.60   16.90
 -20   6  -1   -0.50   20.50
  20   6   1   16.10   18.60
  20   6   1   46.60   21.30
  20   6   1   60.59   19.20
  21  -6   1    9.40   15.80
  21  -6   1    4.20   20.30
 -21  -6  -1   17.10   20.00
  21  -6   1   40.80   22.70
 -21  -6  -1   35.20   19.10
  21  -6   1   22.80   21.30
 -21   6  -1   15.60   18.90
  21   6   1    1.00   15.80
  21   6   1   22.50   19.00
  21   6   1  -27.50   18.40
  21   6   1   -4.00   18.30
  22  -6   1   -0.50   14.30
  22  -6   1   -3.90   23.50
  22  -6   1   15.30   18.80
 -22  -6  -1   41.50   21.10
 -22  -6  -1   17.10   19.90
  22  -6   1  -31.50   19.30
 -22   6  -1   50.99   23.20
  22   6   1  -10.00   16.30
  22   6   1   25.50   22.70
  23  -7  -1   26.90   20.70
  23   7  -1   19.20   21.30
  22  -7  -1   25.50   20.90
 -22  -7   1   76.79   24.00
 -22  -7   1   44.00   21.30
  22  -7  -1   23.70   18.00
  22  -7  -1   57.79   24.40
  22  -7  -1   17.40   22.70
  22   7  -1   65.39   21.50
  22   7  -1   36.90   22.20
  22   7  -1    7.50   20.20
  22   7  -1   34.20   20.20
 -22   7   1   34.70   22.20
 -21  -7   1  203.88   26.70
  21  -7  -1  186.68   27.90
  21  -7  -1  231.08   26.80
 -21  -7   1  226.28   33.10
  21  -7  -1  169.18   28.10
  21  -7  -1  202.08   30.30
  21   7  -1  207.88   29.30
  21   7  -1  136.59   27.00
 -21   7   1  240.48   34.90
  21   7  -1  241.58   31.10
  21   7  -1  209.28   26.90
  20  -7  -1  106.29   23.80
  20  -7  -1   44.90   20.90
  20  -7  -1   94.19   20.10
 -20  -7   1   68.49   22.30
 -20  -7   1   64.19   19.00
  20  -7  -1   68.49   21.30
  20   7  -1   55.69   21.20
  20   7  -1   68.49   19.00
 -20   7   1   84.19   22.90
  20   7  -1   86.69   23.30
  20   7  -1   79.29   21.40
  19  -7  -1   62.49   20.90
  19  -7  -1   57.29   20.70
  19  -7  -1   86.79   21.60
  19  -7  -1   96.89   19.20
 -19  -7   1  118.19   20.90
 -19  -7   1   78.89   20.70
  19   7  -1   62.39   20.30
  19   7  -1  107.49   23.20
  19   7  -1  102.89   20.70
  19   7  -1  105.49   22.50
 -19   7   1  106.89   22.60
  18  -7  -1   46.50   16.80
  18  -7  -1   30.10   18.20
  18  -7  -1   14.20   17.30
 -18  -7   1   60.99   19.30
  18  -7  -1   16.80   18.20
 -18  -7   1   32.20   15.30
  18   7  -1   89.79   21.20
  18   7  -1   44.00   16.80
 -18   7   1   69.69   19.90
 -18   7   1   37.50    9.40
  18   7  -1   44.20   18.40
  18   7  -1   26.50   18.40
 -17  -7   1   -0.20   15.00
 -17  -7   1   18.30   13.50
  17  -7  -1    9.10   11.70
  17  -7  -1    5.30   13.50
  17  -7  -1    1.70   16.60
  17  -7  -1   18.50   19.20
  17   7  -1   -9.60   14.30
 -17   7   1   -5.90   16.40
  17   7  -1   14.20   16.60
 -17   7   1   16.40    8.10
  17   7  -1    4.80   11.90
  17   7  -1  -11.40   14.50
  16  -7  -1    4.80   15.70
  16  -7  -1   16.60   14.00
  16  -7  -1    2.70   12.50
 -16  -7   1   18.30   16.20
  16  -7  -1   21.30   15.10
 -16  -7   1   28.20   14.50
 -16   7   1   30.90   16.40
  16   7  -1    4.10   11.90
 -16   7   1    0.60    7.10
  16   7  -1   19.40   15.70
  16   7  -1   21.30   11.20
  15  -7  -1  273.27   23.00
  15  -7  -1  327.87   28.50
 -15  -7   1  268.27   22.40
  15  -7  -1  274.17   24.00
  15  -7  -1  271.87   27.30
 -15  -7   1  274.87   26.70
  15   7  -1  263.37   22.10
  15   7  -1  262.37   26.40
  15   7  -1  285.47   26.50
  15   7  -1  265.07   26.40
 -15   7   1  255.27   26.50
 -15   7   1  246.38   15.60
  14  -7  -1   10.90   15.40
  14  -7  -1    2.90   13.80
  14  -7  -1    6.20   11.70
 -14  -7   1  -12.50   11.90
  14  -7  -1   10.10   13.80
 -14  -7   1    4.30   10.70
  14   7  -1   -1.40   13.90
  14   7  -1    7.40   13.10
  14   7  -1   25.20   13.40
  14   7  -1   16.30   11.00
 -14   7   1   15.10    5.40
 -14   7   1  -11.90   12.50
  13  -7  -1  157.28   20.70
  13  -7  -1   96.19   18.30
  13  -7  -1  125.59   19.50
 -13  -7   1  120.89   19.70
  13  -7  -1  141.99   17.00
  13  -7  -1  141.39   17.50
  13  -7  -1  112.79    9.70
 -13  -7   1  110.69   17.90
 -13  -7   1  132.79   15.80
  13   7  -1  118.09   18.90
  13   7  -1  101.29   14.00
  13   7  -1  137.39   17.70
 -13   7   1  130.19   11.70
 -13   7   1  120.49   18.00
  13   7  -1  101.29   16.60
  13   7  -1  139.69   20.00
 -13   7   1  139.79   11.00
  13   7  -1  133.49   16.30
  12  -7  -1  646.34   25.40
 -12  -7   1  647.64   31.00
  12  -7  -1  644.74   35.20
  12  -7  -1  680.63   32.00
  12  -7  -1  608.34   34.10
 -12  -7   1  666.33   35.00
 -12  -7   1  571.04   33.80
 -12  -7   1  614.14   30.50
  12  -7  -1  624.34   32.70
  12  -7  -1  613.34   35.30
  12   7  -1  687.63   33.40
  12   7  -1  680.93   32.30
  12   7  -1  635.24   33.80
  12   7  -1  665.43   34.90
  12   7  -1  679.13   35.20
  12   7  -1  603.24   31.90
 -12   7   1  647.64   34.10
 -12   7   1  642.54   25.70
  11  -7  -1   22.50    6.80
 -11  -7   1   40.40   13.30
 -11  -7   1   13.40    9.60
  11  -7  -1   25.60   11.00
  11  -7  -1    3.60    9.20
 -11  -7   1   10.40   10.60
 -11  -7   1   23.90   10.20
  11  -7  -1    7.00   10.40
  11  -7  -1   21.10   13.60
  11  -7  -1   23.40   12.50
 -11  -7   1   18.90   10.80
  11   7  -1   20.30   12.90
  11   7  -1   21.80   11.20
 -11   7   1   12.90    7.10
  11   7  -1   13.50   10.90
  11   7  -1   16.20   12.30
  11   7  -1   15.00   12.70
 -11   7   1   19.40    8.10
 -11   7   1   26.90    5.40
  11   7  -1   11.20    8.50
 -11   7   1   33.20   10.90
  10  -7  -1    6.40   11.50
  10  -7  -1   -7.10    8.60
 -10  -7   1   -0.20    8.50
 -10  -7   1    4.50   11.10
 -10  -7   1  -11.90    7.30
  10  -7  -1   -0.40   11.10
  10  -7  -1    7.60    6.00
  10  -7  -1    2.50   11.90
 -10  -7   1   12.10   10.20
 -10  -7   1   -9.70   10.80
  10  -7  -1    7.40    9.30
 -10  -7   1   -6.90    7.80
  10   7  -1    0.90   13.50
 -10   7   1    4.30    3.90
 -10   7   1   -9.50    5.50
 -10   7   1    3.60    6.50
  10   7  -1    5.20    9.20
  10   7  -1    7.70    9.10
  10   7  -1  -10.00   10.50
 -10   7   1   -0.70   10.80
  10   7  -1  -17.40    9.80
 -10   7   1   -4.30    8.00
  10   7  -1    8.30   11.40
  10   7  -1   -1.30    7.40
   9  -7  -1  141.69   15.50
   9  -7  -1  161.48   15.90
   9  -7  -1  157.38   18.00
  -9  -7   1  148.19   16.70
  -9  -7   1  149.29   16.10
  -9  -7   1  164.68   16.10
   9  -7  -1  168.28   16.50
  -9  -7   1  144.29   13.50
   9  -7  -1  134.39   11.40
   9  -7  -1  142.59   17.80
  -9  -7   1  156.28   18.10
  -9  -7   1  111.59   16.20
   9   7  -1  143.09   12.40
  -9   7   1  162.48    8.50
   9   7  -1  154.28   17.50
   9   7  -1  165.18   18.10
  -9   7   1  158.08   17.50
   9   7  -1  153.28   16.70
  -9   7   1  145.59   15.90
   9   7  -1  174.08   16.50
  -9   7   1  153.48   12.70
   9   7  -1  151.58   16.00
  -9   7   1  137.19    8.10
   9   7  -1  179.48   18.40
  -9   7   1  146.69   15.60
   8  -7  -1  630.24   26.10
  -8  -7   1  584.24   31.00
   8  -7  -1  636.24   31.00
  -8  -7   1  615.84   30.70
  -8  -7   1  593.14   26.00
  -8  -7   1  605.84   29.10
   8  -7  -1  668.43   32.60
  -8  -7   1  603.44   29.10
   8  -7  -1  695.03   32.10
  -8  -7   1  633.24   29.70
   8  -7  -1  659.63   28.80
   8  -7  -1  644.74   29.10
  -8  -7   1  612.34   29.80
   8  -7  -1  654.33   30.10
   8   7  -1  628.34   31.10
   8   7  -1  628.04   29.60
  -8   7   1  619.74   21.30
  -8   7   1  646.44   29.40
  -8   7   1  591.14   28.30
   8   7  -1  649.24   31.20
   8   7  -1  585.24   29.30
   8   7  -1  618.94   29.70
   8   7  -1  611.74   29.60
  -8   7   1  649.64   26.70
   8   7  -1  630.14   30.60
   8   7  -1  615.14   25.80
  -8   7   1  646.64   31.10
  -8   7   1  618.94   22.00
   7  -7  -1  439.56   25.90
   7  -7  -1  433.26   22.20
  -7  -7   1  440.36   23.00
   7  -7  -1  405.86   22.00
   7  -7  -1  423.36   22.00
   7  -7  -1  452.25   25.20
  -7  -7   1  446.16   25.30
   7  -7  -1  428.96   20.70
  -7  -7   1  446.26   23.70
  -7  -7   1  381.86   22.20
  -7  -7   1  423.66   20.00
  -7  -7   1  491.85   24.10
   7  -7  -1  407.06   24.30
   7   7  -1  430.16   24.20
   7   7  -1  460.55   25.10
  -7   7   1  476.45   23.80
  -7   7   1  425.56   15.40
   7   7  -1  439.26   19.20
   7   7  -1  431.46   24.70
   7   7  -1  391.26   24.00
   7   7  -1  414.26   22.90
  -7   7   1  418.76   21.00
  -7   7   1  457.05   21.30
  -7   7   1  426.36   23.20
  -7   7   1  428.26   22.90
   7   7  -1  448.06   26.10
  -7   7   1  345.17   22.70
  -6  -7   1  144.39   16.20
[truncated: 5,177,941 more chars]
